# Supplementary material for: Transcriptomics analysis and hormonal changes of male and female neonatal rats treated chronically with a low dose of acrylamide in their drinking water
Source: PubMed Central journal article supplement — Toxicol Rep. 2016 Mar 19;3:414–26. doi: 10.1016/j.toxrep.2016.03.009 (PMC5615912; doi:10.1016/j.toxrep.2016.03.009), 2016-03-19
Supplement: mmc2.pdf [file mmc2.pdf]

**Table S1. Genes significantly altered in the thyroid glands of RccHan Wistar rats after a sub-chronically exposed to AA (3 mg/Kg bw/day) in drinking water.**

| Probe Name    | Gen bank Accession | Entrez GeneID | Gene Symbol | Gene Name                                                                                                    | p-value MN | Fold Change MN | p-value FN | Fold Change FN | p-value FM | Fold Change FM |
|---------------|--------------------|---------------|-------------|--------------------------------------------------------------------------------------------------------------|------------|----------------|------------|----------------|------------|----------------|
| A_64_P120327  | XM_001078857       | 29605         | Myh13       | myosin, heavy chain 13, skeletal muscle                                                                      | 4.99E-02   | -12.5          | 2.85E-01   | NS             | 9.39E-02   | NS             |
| A_44_P124219  | NM_001013247       | 367086        | Sln         | sarcolipin                                                                                                   | 3.51E-03   | -6.8           | 2.48E-01   | NS             | 7.88E-02   | NS             |
| A_44_P435713  | NM_001010970       | 24203         | Amy1a       | amylase, alpha 1A (salivary)                                                                                 | 2.13E-02   | -6.7           | 3.06E-01   | NS             | 5.04E-02   | NS             |
| A_43_P15812   | NM_031607          | 50565         | Hspb7       | heat shock protein family, member 7 (cardiovascular)                                                         | 3.56E-02   | -6.4           | 2.37E-02   | -2.6           | 6.54E-02   | NS             |
| A_64_P116108  | XR_008539          |               |             |                                                                                                              | 4.43E-02   | -5.9           | 2.54E-01   | NS             | 4.31E-02   | 2.4            |
| A_44_P116652  | NM_019298          | 54240         | Chrnd       | cholinergic receptor, nicotinic, delta                                                                       | 4.28E-02   | -5.8           | 2.22E-01   | NS             | 1.39E-02   | 2.5            |
| A_42_P600215  | NM_175844          | 286965        | Abra        | actin-binding Rho activating protein                                                                         | 2.44E-02   | -5.8           | 1.35E-01   | NS             | 1.92E-01   | NS             |
| A_44_P142837  | XM_236702          | 316071        | Xirp1       | xin actin-binding repeat containing 1 similar to Myosin light polypeptide 4                                  | 3.79E-02   | -5.8           | 1.62E-01   | NS             | 2.08E-01   | NS             |
| A_42_P643349  | NM_001109495       | 688228        | LOC688228   | (Myosin light chain 1, atrial isoform)                                                                       | 3.98E-02   | -5.6           | 1.52E-01   | NS             | 1.35E-01   | NS             |
| A_64_P107409  | XM_001071732       | 498267        | Dusp27      | dual specificity phosphatase 27 (putative)                                                                   | 4.78E-02   | -5.5           | 1.36E-01   | NS             | 5.32E-02   | NS             |
| A_64_P029501  | NM_001034105       | 290561        | Tnnc1       | troponin C type 1 (slow)                                                                                     | 4.95E-02   | -5.5           | 1.69E-01   | NS             | 2.93E-01   | NS             |
| A_44_P217919  | NM_001106148       | 291605        | Myot        | myotilin                                                                                                     | 4.88E-02   | -5.0           | 1.13E-01   | NS             | 8.19E-02   | NS             |
| A_64_P022654  | NM_001109085       | 498316        | LOC498316   | hypothetical LOC498316 SH3 domain binding glutamic acid-rich protein                                         | 1.30E-02   | -4.9           | 1.34E-01   | NS             | 6.69E-02   | NS             |
| A_44_P471450  | NM_001127682       | 498066        | Sh3bgr      |                                                                                                              | 4.29E-02   | -4.8           | 1.62E-01   | NS             | 5.02E-02   | NS             |
| A_44_P532133  | XR_008863          |               |             |                                                                                                              | 1.80E-02   | -4.8           | 2.44E-01   | NS             | 1.02E-01   | NS             |
| A_64_P102049  | NM_001109401       | 680319        | LOC680319   | hypothetical protein LOC680319                                                                               | 3.67E-02   | -4.7           | 1.17E-01   | NS             | 2.69E-01   | NS             |
| A_64_P042586  | NM_001013039       | 259167        | Art5        | ADP-ribosyltransferase 5 ubiquitin-conjugating enzyme E2Q family-like 1                                      | 1.47E-02   | -4.6           | 6.83E-02   | NS             | 8.88E-02   | NS             |
| A_64_P042302  | NM_001145163       | 679949        | Ube2q1      |                                                                                                              | 2.05E-02   | -4.6           | 9.87E-02   | NS             | 1.64E-01   | NS             |
| A_44_P352331  | NM_001077590       | 365603        | Bves        | blood vessel epicardial substance                                                                            | 2.85E-02   | -4.5           | 9.05E-02   | NS             | 6.22E-02   | NS             |
| A_64_P130627  | NM_001013930       | 298139        | LOC298139   | similar to RIKEN cDNA 2310003M01 fibronectin type III and SPRY domain containing 2                           | 4.52E-02   | -4.5           | 2.48E-01   | NS             | 5.16E-02   | NS             |
| A_44_P503708  | XM_001062337       | 308779        | Fsd2        |                                                                                                              | 4.42E-02   | -4.4           | 9.03E-02   | NS             | 4.75E-02   | 4.5            |
| A_64_P102043  | NM_001109401       | 680319        | LOC680319   | hypothetical protein LOC680319                                                                               | 4.62E-02   | -4.4           | 8.25E-02   | NS             | 4.34E-01   | NS             |
| A_64_P060094  | NM_001012001       | 301033        | Lrrc2       | leucine rich repeat containing 2                                                                             | 3.57E-02   | -4.4           | 9.66E-02   | NS             | 1.20E-01   | NS             |
| A_44_P389448  | XM_228900          | 317454        | RGD1560334  | similar to Myosin light chain 1 slow a                                                                       | 4.12E-02   | -4.3           | 4.94E-01   | NS             | 3.87E-01   | NS             |
| A_64_P026858  | NM_001106451       | 295315        | Tbx15       | T-box 15                                                                                                     | 4.39E-02   | -4.3           | 1.39E-01   | NS             | 2.99E-02   | 3.3            |
| A_64_P100059  | XM_213443          | 287659        | Socs7       | suppressor of cytokine signaling 7                                                                           | 4.44E-02   | -4.2           | 1.47E-01   | NS             | 2.80E-02   | 3.4            |
| A_64_P165386  | NM_001109333       | 502225        | Lrrc14b     | leucine rich repeat containing 14B triggering receptor expressed on myeloid cells 1                          | 3.61E-02   | -4.2           | 1.02E-01   | NS             | 2.25E-03   | 8.1            |
| A_44_P354415  | NM_001106885       | 301229        | Trem1       |                                                                                                              | 1.26E-04   | -4.2           | 9.60E-01   | NS             | 1.62E-01   | NS             |
| A_64_P162476  | NM_001107541       | 308873        | Art1        | ADP-ribosyltransferase 1                                                                                     | 3.62E-02   | -4.1           | 1.13E-01   | NS             | 1.26E-01   | NS             |
| A_64_P034740  | NM_001101003       | 681190        | Kcne1l      | potassium voltage-gated channel, Isk-related family, member 1-like acyl-Coenzyme A oxidase 2, branched chain | 1.92E-02   | -4.0           | 5.12E-01   | NS             | 9.90E-03   | 4.7            |
| A_44_P330188  | NM_145770          | 252898        | Acox2       |                                                                                                              | 5.71E-03   | -3.9           | 2.23E-03   | -2.1           | 7.64E-02   | NS             |
| A_44_P478313  | XR_008378          |               |             |                                                                                                              | 4.72E-03   | -3.9           | 2.44E-02   | -1.6           | 6.03E-01   | NS             |
| A_43_P12768   | NM_053328          | 79431         | Bhlhe40     | basic helix-loop-helix family, member e40                                                                    | 9.78E-04   | -3.9           | 1.78E-01   | NS             | 1.73E-01   | NS             |
| A_44_P1035007 | NM_017194          | 29422         | Chrme       | cholinergic receptor, nicotinic, epsilon ankyrin repeat and SOCS box-containing 14                           | 1.32E-02   | -3.8           | 3.34E-01   | NS             | 6.00E-03   | 4.0            |
| A_64_P099897  | NM_001170749       | 680076        | Asb14       |                                                                                                              | 3.63E-02   | -3.7           | 8.52E-02   | NS             | 3.86E-02   | 4.8            |
| A_44_P384090  | NM_022531          | 64362         | Des         | desmin                                                                                                       | 4.91E-02   | -3.6           | 6.76E-02   | NS             | 9.33E-02   | NS             |
| A_64_P311745  | NM_001107987       | 313625        | Myom3       | myomesin family, member 3                                                                                    | 1.52E-02   | -3.6           | 1.09E-01   | NS             | 1.72E-01   | NS             |
| A_43_P12790   | NM_053381          | 84396         | Atp1b4      | ATPase, (Na <sup>+</sup> )/K <sup>+</sup> transporting, beta 4 polypeptide                                   | 3.51E-02   | -3.6           | 1.08E-01   | NS             | 1.40E-01   | NS             |
| A_44_P390995  | NM_013044          | 25566         | Tmod1       | tropomodulin 1                                                                                               | 2.12E-02   | -3.6           | 1.29E-01   | NS             | 3.61E-02   | 3.6            |
| A_44_P835847  | NM_001134436       | 294806        | C1qtnf3     | C1q and tumor necrosis factor related protein 3                                                              | 4.16E-03   | -3.6           | 4.52E-02   | -2.9           | 7.08E-02   | NS             |
| A_64_P237784  | XM_001073426       | 690139        | Rbm24       | RNA binding motif protein 24                                                                                 | 1.11E-02   | -3.5           | 2.03E-01   | NS             | 4.51E-02   | 3.0            |
| A_64_P082540  | NM_145877          | 113886        | Kif1c       | kinesin family member 1C                                                                                     | 4.43E-02   | -3.5           | 3.69E-02   | -2.2           | 5.63E-01   | NS             |
| A_44_P139291  | NM_001135778       | 680409        | Prodh       | proline dehydrogenase                                                                                        | 3.76E-02   | -3.5           | 1.28E-03   | 1.9            | 9.64E-01   | NS             |

|              |              |        |           |                                                                                                                                                                           |          |      |          |      |          |      |
|--------------|--------------|--------|-----------|---------------------------------------------------------------------------------------------------------------------------------------------------------------------------|----------|------|----------|------|----------|------|
| A_44_P548611 | XM_001054443 | 317224 | Fndc3c1   | fibronectin type III domain containing 3C1                                                                                                                                | 1.62E-02 | -3.5 | 8.68E-02 | NS   | 9.89E-02 | NS   |
| A_64_P137486 | XM_001068161 | 688750 | Cd209g    | CD209g molecule<br>ankyrin repeat and SOCS box-containing                                                                                                                 | 8.19E-04 | -3.5 | 3.06E-02 | -2.0 | 1.04E-01 | NS   |
| A_64_P127488 | XM_001055574 | 680076 | Asb14     | 14                                                                                                                                                                        | 2.35E-02 | -3.5 | 3.96E-02 | -3.5 | 6.20E-02 | NS   |
| A_43_P15638  | NM_053861    | 116640 | Tnc       | tenascin C                                                                                                                                                                | 6.60E-03 | -3.4 | 7.88E-01 | NS   | 2.71E-02 | 5.1  |
| A_44_P210852 | NM_001034187 | 307472 | Sh3rf2    | SH3 domain containing ring finger 2                                                                                                                                       | 4.62E-02 | -3.4 | 6.07E-02 | NS   | 3.43E-02 | 2.6  |
| A_43_P19787  | XM_001054550 |        |           |                                                                                                                                                                           | 4.92E-02 | -3.4 | 9.51E-01 | NS   | 6.25E-01 | NS   |
| A_42_P464434 | XM_215498    |        |           |                                                                                                                                                                           | 7.25E-03 | -3.4 | 4.75E-02 | -3.9 | 2.09E-01 | NS   |
|              |              |        |           | leukocyte immunoglobulin-like receptor,<br>subfamily B (with TM and ITIM domains),<br>member 3-like                                                                       |          |      |          |      |          |      |
| A_64_P111058 | NM_001037357 | 361493 | Lilrb3l   |                                                                                                                                                                           | 1.27E-02 | -3.4 | 5.87E-02 | NS   | 2.68E-01 | NS   |
| A_44_P409232 | NM_031543    | 25086  | Cyp2e1    | cytochrome P450, family 2, subfamily e,<br>polypeptide 1                                                                                                                  | 1.59E-03 | -3.4 | 2.79E-01 | NS   | 1.80E-02 | 2.4  |
|              |              |        |           | glutamine-fructose-6-phosphate<br>transaminase 2                                                                                                                          |          |      |          |      |          |      |
| A_43_P18793  | NM_001002819 | 360518 | Gfpt2     |                                                                                                                                                                           | 2.14E-02 | -3.4 | 1.99E-02 | -1.8 | 4.66E-02 | 2.2  |
| A_42_P540920 | NM_001135045 | 363153 | Arpp-21   | cyclic AMP-regulated phosphoprotein                                                                                                                                       | 4.51E-02 | -3.4 | 1.51E-01 | NS   | 3.74E-02 | 3.1  |
| A_64_P074440 | XM_001073426 | 690139 | Rbm24     | RNA binding motif protein 24                                                                                                                                              | 6.62E-03 | -3.3 | 1.10E-01 | NS   | 7.11E-02 | NS   |
| A_64_P078862 | NM_019183    | 29275  | Actc1     | actin, alpha, cardiac muscle 1                                                                                                                                            | 9.43E-03 | -3.3 | 1.72E-01 | NS   | 4.06E-02 | 3.3  |
| A_44_P638191 | XM_574086    | 498803 | Otud1     | OTU domain containing 1                                                                                                                                                   | 1.48E-02 | -3.3 | 3.21E-01 | NS   | 2.02E-01 | NS   |
| A_44_P135650 | XM_001069604 | 311167 | Smtnl1    | smoothelin-like 1                                                                                                                                                         | 3.77E-02 | -3.3 | 1.49E-01 | NS   | 7.14E-02 | NS   |
| A_64_P161818 | NM_001107985 | 313610 | Extl1     | exostoses (multiple)-like 1                                                                                                                                               | 4.03E-02 | -3.3 | 1.59E-01 | NS   | 3.37E-02 | 2.7  |
| A_64_P023355 | XM_001081149 |        |           |                                                                                                                                                                           | 4.71E-02 | -3.3 | 1.58E-01 | NS   | 2.32E-02 | -2.4 |
| A_64_P053785 | NM_012739    | 25083  | Adra2a    | adrenergic, alpha-2A-, receptor<br>potassium voltage-gated channel, shaker-<br>related subfamily, member 7                                                                | 6.63E-03 | -3.3 | 2.33E-01 | NS   | 1.98E-01 | NS   |
| A_64_P000870 | NM_001108914 | 365241 | Kcna7     |                                                                                                                                                                           | 2.04E-02 | -3.3 | 2.39E-02 | -2.1 | 3.70E-01 | NS   |
| A_64_P005581 | NM_001038615 | 308099 | Fndc1     | fibronectin type III domain containing 1<br>similar to Tumor necrosis factor, alpha-<br>induced protein 3 (Putative DNA binding<br>protein A20) (Zinc finger protein A20) | 1.85E-02 | -3.3 | 4.97E-02 | -1.6 | 3.58E-02 | 3.2  |
|              |              |        |           | similar to Protein C6orf142 homolog                                                                                                                                       |          |      |          |      |          |      |
| A_64_P101950 | XM_001060914 | 683206 | LOC683206 |                                                                                                                                                                           | 4.37E-02 | -3.2 | 6.02E-01 | NS   | 4.91E-01 | NS   |
| A_64_P127789 | XM_002729912 | 691933 | LOC691933 |                                                                                                                                                                           | 4.00E-02 | -3.2 | 8.47E-02 | NS   | 1.08E-01 | NS   |
| A_64_P095586 | NM_001109085 | 498316 | LOC498316 | hypothetical LOC498316<br>creatine kinase, mitochondrial 2,<br>sarcomeric                                                                                                 | 6.93E-03 | -3.2 | 1.19E-01 | NS   | 1.05E-01 | NS   |
| A_42_P615837 | NM_001127652 | 688698 | Ckmt2     |                                                                                                                                                                           | 4.90E-02 | -3.1 | 1.35E-01 | NS   | 1.54E-01 | NS   |
| A_44_P367761 | NM_012923    | 25405  | Ccng1     | cyclin G1                                                                                                                                                                 | 2.10E-02 | -3.1 | 3.78E-02 | -3.9 | 1.48E-01 | NS   |
|              |              |        |           | glutamic-oxaloacetic transaminase 1,<br>soluble (aspartate aminotransferase 1)                                                                                            |          |      |          |      |          |      |
| A_44_P388973 | NM_012571    | 24401  | Got1      |                                                                                                                                                                           | 2.52E-02 | -3.1 | 3.66E-01 | NS   | 6.62E-02 | NS   |
| A_44_P134143 | NM_053612    | 113906 | Hspb8     | heat shock protein B8                                                                                                                                                     | 4.12E-02 | -3.1 | 1.53E-01 | NS   | 4.11E-02 | 3.3  |
|              |              |        |           | CAP, adenylate cyclase-associated protein,<br>2 (yeast)                                                                                                                   |          |      |          |      |          |      |
| A_43_P12967  | NM_053874    | 116653 | Cap2      |                                                                                                                                                                           | 4.59E-02 | -3.1 | 5.52E-02 | NS   | 6.78E-02 | NS   |
|              |              |        |           | similar to T-box transcription factor TBX15<br>(T-box protein 15) (MmTBx8)                                                                                                |          |      |          |      |          |      |
| A_64_P023715 | XM_575564    | 500213 | LOC500213 | ankyrin repeat and SOCS box-containing<br>10                                                                                                                              | 6.36E-04 | -3.1 | 2.51E-01 | NS   | 3.50E-01 | NS   |
| A_44_P621454 | NM_001109216 | 499972 | Asb10     |                                                                                                                                                                           | 3.41E-02 | -3.1 | 4.19E-02 | -2.1 | 8.64E-02 | NS   |
| A_42_P476474 | NM_001033926 | 25177  | Fhl1      | four and a half LIM domains 1                                                                                                                                             | 4.16E-02 | -3.1 | 1.49E-01 | NS   | 1.18E-01 | NS   |
| A_64_P099452 | NM_030828    | 58920  | Gpc1      | glypican 1                                                                                                                                                                | 1.26E-02 | -3.0 | 9.17E-02 | NS   | 1.21E-01 | NS   |
| A_64_P043161 | NM_001127547 | 315191 | Fbln1     | fibulin 1                                                                                                                                                                 | 2.12E-02 | -3.0 | 1.09E-01 | NS   | 1.29E-01 | NS   |
|              |              |        |           | ribonuclease, RNase A family, 2 (liver,<br>eosinophil-derived neurotoxin)                                                                                                 |          |      |          |      |          |      |
| A_42_P782235 | NM_001007015 | 474169 | Rnase2    |                                                                                                                                                                           | 1.97E-02 | -3.0 | 1.97E-01 | NS   | 6.02E-01 | NS   |
| A_64_P100983 | NM_001025008 | 314996 | Khl38     | kelch-like 38 (Drosophila)                                                                                                                                                | 3.16E-02 | -3.0 | 9.44E-02 | NS   | 7.45E-02 | NS   |
| A_64_P140275 | NM_001107765 | 311348 | Cdan1     | congenital dyserythropoietic anemia, type I                                                                                                                               | 4.82E-02 | -3.0 | 5.64E-01 | NS   | 6.89E-01 | NS   |
| A_44_P112551 | NM_001108180 | 315962 | Ky        | kyphoscoliosis peptidase                                                                                                                                                  | 1.91E-02 | -3.0 | 3.14E-02 | -2.5 | 4.14E-02 | 2.8  |
| A_42_P765066 | NM_021588    | 59108  | Mb        | myoglobin                                                                                                                                                                 | 3.88E-02 | -3.0 | 1.34E-01 | NS   | 2.54E-01 | NS   |
|              |              |        |           | wingless-type MMTV integration site family,<br>member 16                                                                                                                  |          |      |          |      |          |      |
| A_64_P092782 | NM_001109223 | 500047 | Wnt16     |                                                                                                                                                                           | 1.34E-02 | -3.0 | 1.70E-01 | NS   | 7.50E-02 | NS   |
|              |              |        |           | V-set domain containing T cell activation<br>inhibitor 1                                                                                                                  |          |      |          |      |          |      |
| A_64_P078624 | NM_001024244 | 295322 | Vtcn1     |                                                                                                                                                                           | 1.89E-02 | -2.9 | 1.29E-01 | NS   | 4.06E-01 | NS   |
| A_44_P478176 | NM_001109637 | 691307 | Lrrc39    | leucine rich repeat containing 39                                                                                                                                         | 3.47E-02 | -2.9 | 1.60E-01 | NS   | 1.56E-01 | NS   |
| A_64_P038177 | NM_001107979 | 313582 | Fhl3      | four and a half LIM domains 3                                                                                                                                             | 4.47E-02 | -2.9 | 2.20E-01 | NS   | 2.96E-02 | 2.2  |
| A_64_P114074 | NM_001170481 | 294312 | Pi16      | peptidase inhibitor 16                                                                                                                                                    | 4.98E-02 | -2.9 | 8.58E-02 | NS   | 1.14E-01 | NS   |

|              |              |        |            |                                                                                               |          |      |          |      |          |      |
|--------------|--------------|--------|------------|-----------------------------------------------------------------------------------------------|----------|------|----------|------|----------|------|
| A_42_P541025 | NM_212546    | 24963  | Hspa1l     | heat shock protein 1-like                                                                     | 4.99E-02 | -2.9 | 7.78E-02 | NS   | 1.78E-01 | NS   |
| A_64_P006464 | XM_001081125 |        |            |                                                                                               | 3.74E-02 | -2.9 | 9.95E-01 | NS   | 8.83E-01 | NS   |
| A_64_P005309 | NM_021746    | 60352  | Mapk12     | mitogen-activated protein kinase 12                                                           | 3.18E-02 | -2.8 | 8.39E-02 | NS   | 3.29E-02 | 2.6  |
| A_64_P236835 | XM_002724984 | 289716 | Ccdc96     | coiled-coil domain containing 96                                                              | 7.91E-03 | -2.8 | 1.77E-02 | 1.5  | 9.52E-01 | NS   |
| A_64_P052076 | NM_001106989 | 302993 | Sox8       | SRY (sex determining region Y)-box 8                                                          | 5.41E-02 | -2.8 | 9.34E-02 | NS   | 6.52E-01 | NS   |
| A_43_P15498  | NM_019145    | 25753  | Chrmg      | cholinergic receptor, nicotinic, gamma myeloid-associated differentiation marker-like 2       | 4.46E-02 | -2.8 | 3.24E-01 | NS   | 3.96E-01 | NS   |
| A_64_P138800 | NM_001128185 | 303744 | Myadml2    |                                                                                               | 4.40E-02 | -2.8 | 7.23E-02 | NS   | 1.65E-01 | NS   |
| A_64_P149016 | BC072512     |        |            |                                                                                               | 3.67E-02 | -2.8 | 1.67E-01 | NS   | 2.74E-02 | 3.3  |
| A_43_P23118  | NM_001108972 | 366366 | Igfbp1     | insulin-like growth factor binding protein-like 1                                             | 1.29E-02 | -2.8 | 2.72E-01 | NS   | 2.45E-01 | NS   |
| A_64_P099011 | NM_030875    | 81574  | Scn1a      | sodium channel, voltage-gated, type I, alpha                                                  | 2.89E-03 | -2.8 | 1.93E-01 | NS   | 7.87E-02 | NS   |
| A_64_P151627 | NM_001135033 | 303214 | Trim16     | tripartite motif-containing 16                                                                | 1.09E-05 | -2.7 | 3.76E-01 | NS   | 5.67E-02 | NS   |
| A_64_P147263 | NM_053566    | 89830  | Ptch1      | patched homolog 1 (Drosophila)                                                                | 7.55E-03 | -2.7 | 1.40E-01 | NS   | 8.65E-01 | NS   |
| A_64_P082431 | XM_001066085 | 499297 | RGD1562011 | similar to MAS-related G-protein coupled receptor, member G                                   | 1.57E-02 | -2.7 | 7.29E-01 | NS   | 8.55E-01 | NS   |
| A_42_P589812 | NM_022618    | 64553  | Akap6      | A kinase (PRKA) anchor protein 6                                                              | 3.82E-02 | -2.7 | 8.99E-02 | NS   | 1.41E-01 | NS   |
| A_64_P083771 | NM_013178    | 25722  | Scn4a      | sodium channel, voltage-gated, type IV, alpha                                                 | 3.13E-02 | -2.7 | 2.83E-02 | -2.2 | 2.80E-01 | NS   |
| A_43_P11616  | NM_012912    | 25389  | Atf3       | activating transcription factor 3                                                             | 1.08E-02 | -2.7 | 5.06E-01 | NS   | 9.08E-01 | NS   |
| A_44_P238897 | NM_001108416 | 361256 | Svil       | supervillin                                                                                   | 1.93E-02 | -2.7 | 1.62E-01 | NS   | 4.64E-02 | 3.0  |
| A_64_P081203 | NM_001173357 | 361548 | Dmkn       | dermokine                                                                                     | 2.91E-02 | -2.7 | 1.89E-01 | NS   | 1.44E-02 | 13.7 |
| A_42_P799702 | NM_145093    | 246323 | Aard       | alanine and arginine rich domain containing protein                                           | 1.53E-02 | -2.6 | 1.58E-01 | NS   | 2.21E-01 | NS   |
| A_42_P674843 | NM_001008880 | 315611 | Scn4b      | sodium channel, voltage-gated, type IV, beta                                                  | 2.02E-02 | -2.6 | 8.31E-02 | NS   | 7.62E-02 | NS   |
| A_64_P033565 | XM_001080527 |        |            |                                                                                               | 3.58E-02 | -2.6 | 1.42E-01 | NS   | 5.78E-02 | NS   |
| A_43_P13386  | NM_139333    | 246216 | Prpf19     | PRP19/PSO4 pre-mRNA processing factor 19 homolog (S. cerevisiae)                              | 1.49E-02 | -2.6 | 6.69E-02 | NS   | 2.72E-01 | NS   |
| A_64_P150276 | NM_001109616 | 691024 | LOC691024  | similar to Protein C9orf25 homolog                                                            | 3.69E-03 | -2.6 | 2.15E-01 | NS   | 8.67E-01 | NS   |
| A_42_P594085 | XM_001060017 |        |            |                                                                                               | 4.17E-02 | -2.6 | 7.51E-02 | NS   | 9.13E-02 | NS   |
| A_43_P19118  | XM_002729912 | 681849 | LOC681849  | similar to Protein C6orf142 homolog                                                           | 3.30E-02 | -2.6 | 7.89E-02 | NS   | 9.78E-02 | NS   |
| A_42_P724510 | NM_001007625 | 291180 | Epdrl      | ependymin related protein 1 (zebrafish)                                                       | 1.53E-02 | -2.6 | 1.17E-01 | NS   | 9.26E-02 | NS   |
| A_64_P036370 | NM_031007    | 81636  | Adcy2      | adenylate cyclase 2 (brain)                                                                   | 3.89E-02 | -2.5 | 6.32E-02 | NS   | 7.04E-02 | NS   |
| A_44_P471818 | XM_001071384 |        |            |                                                                                               | 4.56E-02 | -2.5 | 1.37E-01 | NS   | 1.92E-02 | 3.3  |
| A_44_P122386 | NM_031750    | 78951  | Hspb3      | heat shock protein 3                                                                          | 3.72E-02 | -2.5 | 9.62E-02 | NS   | 1.59E-01 | NS   |
| A_64_P006220 | NM_001109637 | 691307 | Lrrc39     | leucine rich repeat containing 39                                                             | 3.30E-02 | -2.5 | 1.11E-01 | NS   | 9.62E-02 | NS   |
| A_64_P112684 | NM_001037357 | 361493 | Lilrb3l    | leukocyte immunoglobulin-like receptor, subfamily B (with TM and ITIM domains), member 3-like | 4.82E-03 | -2.5 | 2.57E-01 | NS   | 6.21E-01 | NS   |
| A_44_P492581 | NM_001012203 | 363192 | Klhdc3     | kelch domain containing 3                                                                     | 4.36E-02 | -2.5 | 7.02E-02 | NS   | 4.97E-02 | 2.1  |
| A_64_P115286 | XR_008378    | 312401 | RGD1311080 | similar to RIKEN cDNA A930038C07                                                              | 1.60E-02 | -2.5 | 8.34E-03 | -1.8 | 4.17E-01 | NS   |
| A_44_P251212 | NM_031715    | 65152  | Pfkm       | phosphofructokinase, muscle                                                                   | 3.64E-02 | -2.5 | 6.04E-02 | NS   | 5.76E-02 | NS   |
| A_42_P503626 | NM_001044247 | 361187 | Asb5       | ankyrin repeat and SOCS box-containing 5 nuclear receptor subfamily 1, group D, member 1      | 2.84E-02 | -2.5 | 1.17E-01 | NS   | 1.03E-01 | NS   |
| A_44_P175041 | NM_145775    | 252917 | Nr1d1      |                                                                                               | 1.61E-02 | -2.5 | 1.17E-01 | NS   | 1.14E-01 | NS   |
| A_42_P752416 | NM_001135238 | 684352 | LOC684352  | similar to twinfilin-like protein                                                             | 9.93E-03 | -2.5 | 5.26E-02 | NS   | 3.30E-02 | 2.3  |
| A_44_P116369 | NM_001002835 | 314280 | Smoc1      | SPARC related modular calcium binding 1                                                       | 2.15E-02 | -2.5 | 9.88E-01 | NS   | 5.10E-03 | -2.2 |
| A_64_P130618 | NM_001013930 | 298139 | LOC298139  | similar to RIKEN cDNA 2310003M01                                                              | 3.17E-02 | -2.4 | 9.27E-02 | NS   | 2.76E-01 | NS   |
| A_44_P374741 | NM_001003958 | 444984 | Dnmt3a     | DNA (cytosine-5-)-methyltransferase 3 alpha                                                   | 3.45E-02 | -2.4 | 4.53E-02 | -1.4 | 5.76E-01 | NS   |
| A_64_P065037 | XM_230745    |        |            |                                                                                               | 1.33E-02 | -2.4 | 1.18E-01 | NS   | 1.59E-01 | NS   |
| A_42_P542638 | NM_001012202 | 363122 | Ppp2r3a    | protein phosphatase 2 (formerly 2A), regulatory subunit B", alpha                             | 1.48E-02 | -2.4 | 8.65E-02 | NS   | 1.45E-01 | NS   |
| A_64_P013288 | NM_019176    | 79423  | Stmn4      | stathmin-like 4                                                                               | 2.12E-02 | -2.4 | 4.79E-01 | NS   | 1.07E-01 | NS   |
| A_64_P078899 | NM_001134826 | 497892 | Sgcd       | sarcoglycan, delta (dystrophin-associated glycoprotein)                                       | 3.38E-02 | -2.4 | 4.48E-02 | -1.8 | 2.46E-01 | NS   |
| A_43_P15884  | AF155823     |        |            |                                                                                               | 4.98E-02 | -2.4 | 5.13E-03 | -1.8 | 4.34E-01 | NS   |

|              |              |           |            |                                                                                                              |          |      |          |      |          |     |
|--------------|--------------|-----------|------------|--------------------------------------------------------------------------------------------------------------|----------|------|----------|------|----------|-----|
| A_64_P049781 | NM_001107451 | 308028    | Slc2a12    | solute carrier family 2 (facilitated glucose transporter), member 12                                         | 3.26E-02 | -2.4 | 5.36E-01 | NS   | 6.77E-01 | NS  |
| A_44_P168159 | NM_022269    | 64036     | Cd55       | Cd55 molecule                                                                                                | 1.61E-03 | -2.4 | 1.10E-01 | NS   | 7.78E-02 | NS  |
| A_64_P108876 | NM_001007006 | 361002    | Dusp13     | dual specificity phosphatase 13                                                                              | 3.42E-02 | -2.4 | 9.33E-02 | NS   | 1.29E-01 | NS  |
| A_44_P335776 | NM_001105894 | 288289    | Chodl      | chondrolectin                                                                                                | 1.30E-02 | -2.4 | 4.69E-02 | -1.7 | 1.10E-01 | NS  |
| A_64_P099055 | XM_001071401 |           |            |                                                                                                              | 5.60E-03 | -2.4 | 1.78E-01 | NS   | 1.42E-01 | NS  |
| A_43_P21122  | NM_001108492 | 361604    | Syt12      | synaptotagmin-like 2                                                                                         | 2.35E-02 | -2.4 | 5.20E-01 | NS   | 3.13E-01 | NS  |
| A_64_P121191 | U83879       | 680324    | LOC680324  | hypothetical protein LOC680324                                                                               | 1.46E-02 | -2.4 | 8.25E-01 | NS   | 7.15E-01 | NS  |
| A_64_P033939 | NM_033651    | 29728     | Mcm4       | minichromosome maintenance complex component 4                                                               | 4.42E-02 | -2.4 | 5.95E-01 | NS   | 7.42E-02 | NS  |
| A_42_P841193 | NM_080399    | 140582    | Ddit4l     | DNA-damage-inducible transcript 4-like                                                                       | 2.74E-02 | -2.4 | 6.26E-02 | NS   | 9.11E-02 | NS  |
| A_44_P943285 | NM_001109093 | 498416    | Grb10      | growth factor receptor bound protein 10                                                                      | 1.31E-02 | -2.4 | 1.35E-01 | NS   | 2.25E-02 | 3.3 |
| A_43_P22561  | NM_001024751 | 293165    | Sox6       | SRY (sex determining region Y)-box 6                                                                         | 3.28E-02 | -2.3 | 9.32E-02 | NS   | 6.71E-02 | NS  |
| A_64_P051691 | NM_013196    | 25747     | Ppara      | peroxisome proliferator activated receptor alpha                                                             | 1.52E-02 | -2.3 | 7.31E-01 | NS   | 5.72E-01 | NS  |
| A_64_P024399 | NM_001108851 | 363872    | Znf498     | zinc finger protein 498                                                                                      | 1.50E-02 | -2.3 | 9.92E-01 | NS   | 7.64E-01 | NS  |
| A_64_P121896 | XM_001065765 | 361492    | Pira2      | paired-Ig-like receptor A2                                                                                   | 6.69E-03 | -2.3 | 1.35E-01 | NS   | 2.16E-01 | NS  |
| A_44_P412322 | XM_221928    |           |            |                                                                                                              | 1.57E-02 | -2.3 | 4.26E-02 | -1.5 | 1.53E-02 | 2.4 |
| A_43_P14436  | NM_001109599 | 690528    | Pou2af1    | POU class 2 associating factor 1                                                                             | 1.47E-03 | -2.3 | 6.16E-01 | NS   | 1.53E-01 | NS  |
| A_64_P071732 | NM_175763    | 302822    | Igsf1      | immunoglobulin superfamily, member 1                                                                         | 1.09E-02 | -2.3 | 3.79E-02 | -2.3 | 2.20E-01 | NS  |
| A_64_P073475 | NM_001024252 | 301164    | Pcaf       | p300/CBP-associated factor                                                                                   | 3.91E-02 | -2.3 | 1.80E-01 | NS   | 8.16E-01 | NS  |
| A_64_P006478 | NM_001013936 | 298606    | Slc25a34   | solute carrier family 25, member 34                                                                          | 4.70E-02 | -2.3 | 1.44E-01 | NS   | 2.93E-01 | NS  |
| A_44_P561166 | NM_001142366 | 25293     | Aqp4       | aquaporin 4                                                                                                  | 4.01E-02 | -2.3 | 6.33E-02 | NS   | 8.50E-02 | NS  |
| A_64_P051802 | NM_001109979 | 100126191 | Rab1b      | RAB1B, member RAS oncogene family DnaJ (Hsp40) homolog, subfamily B, member 5                                | 2.47E-02 | -2.3 | 9.39E-01 | NS   | 4.98E-01 | NS  |
| A_44_P331706 | NM_001108004 | 313811    | Dnajb5     | similar to RIKEN cDNA 6330416G13 gene                                                                        | 1.97E-02 | -2.3 | 1.66E-01 | NS   | 2.69E-02 | 3.7 |
| A_44_P103114 | NM_001106661 | 298104    | RGD1304595 | similar to ESO3 protein                                                                                      | 7.31E-03 | -2.3 | 1.47E-01 | NS   | 6.32E-01 | NS  |
| A_64_P074725 | XM_001081754 | 363523    | RGD1565203 | kinesin family member 1B                                                                                     | 4.12E-02 | -2.3 | 4.99E-01 | NS   | 3.57E-01 | NS  |
| A_64_P105573 | NM_057200    | 117548    | Kif1b      | shisa homolog 4 (Xenopus laevis)                                                                             | 4.28E-02 | -2.3 | 7.36E-01 | NS   | 1.27E-01 | NS  |
| A_44_P959143 | NM_001077826 | 360848    | Shisa4     | tollid-like 2                                                                                                | 4.60E-02 | -2.3 | 5.03E-02 | NS   | 1.12E-01 | NS  |
| A_64_P117251 | XM_001054070 | 365460    | Tll2       | dickkopf homolog 2 (Xenopus laevis)                                                                          | 1.08E-02 | -2.2 | 8.74E-01 | NS   | 6.72E-01 | NS  |
| A_64_P103414 | NM_001106472 | 295445    | Dkk2       | thrombospondin 4                                                                                             | 1.05E-02 | -2.2 | 2.10E-01 | NS   | 1.42E-01 | NS  |
| A_44_P337311 | XM_001066338 | 29220     | Thbs4      | zinc finger protein 641                                                                                      | 4.44E-02 | -2.2 | 9.67E-01 | NS   | 3.80E-02 | 2.7 |
| A_64_P071858 | NM_001106792 | 300197    | Znf641     | XK, Kell blood group complex subunit-related family, member 4                                                | 1.79E-02 | -2.2 | 6.70E-03 | -1.7 | 1.97E-01 | NS  |
| A_64_P104713 | NM_001011971 | 297801    | Xkr4       | msh homeobox 2                                                                                               | 1.46E-02 | -2.2 | 2.76E-01 | NS   | 1.39E-01 | NS  |
| A_44_P716637 | NM_012982    | 25483     | Msx2       | lysozyme C type 2                                                                                            | 2.04E-03 | -2.2 | 6.72E-01 | NS   | 1.44E-01 | NS  |
| A_44_P452186 | XM_002725446 |           |            |                                                                                                              | 2.06E-02 | -2.2 | 2.40E-01 | NS   | 1.06E-01 | NS  |
| A_64_P215398 | NM_001128494 | 688047    | Lyc2       | UDP-Gal:betaGlcNAc beta 1,3-galactosyltransferase, polypeptide 1 similar to Fructose-bisphosphate aldolase A | 5.81E-03 | -2.2 | 5.56E-01 | NS   | 3.60E-01 | NS  |
| A_64_P141349 | NM_001108954 | 366064    | B3galt1    | (Muscle-type aldolase)                                                                                       | 8.44E-03 | -2.2 | 3.92E-02 | -1.7 | 5.07E-01 | NS  |
| A_64_P138790 | NM_001109504 | 688539    | LOC688539  | phytanoyl-CoA 2-hydroxylase                                                                                  | 3.62E-02 | -2.2 | 4.91E-02 | -1.5 | 3.62E-02 | 2.2 |
| A_44_P191021 | NM_053674    | 114209    | Phyh       | interleukin 17 receptor B                                                                                    | 8.43E-03 | -2.2 | 7.31E-01 | NS   | 6.61E-02 | NS  |
| A_64_P115212 | NM_001107290 | 306247    | Il17rb     | protein kinase-like protein Sgk493                                                                           | 1.67E-02 | -2.2 | 4.35E-01 | NS   | 7.70E-01 | NS  |
| A_42_P459349 | NM_001108007 | 313860    | Sgk493     | v-ets erythroblastosis virus E26 oncogene homolog 1 (avian)                                                  | 1.88E-02 | -2.2 | 1.95E-01 | NS   | 3.96E-02 | 2.9 |
| A_64_P097223 | NM_012555    | 24356     | Ets1       | forkhead box O4                                                                                              | 1.79E-02 | -2.2 | 5.19E-01 | NS   | 1.33E-01 | NS  |
| A_64_P085082 | NM_001106943 | 302415    | Foxo4      | leucine rich repeat containing 20                                                                            | 3.56E-02 | -2.2 | 9.08E-02 | NS   | 1.88E-01 | NS  |
| A_44_P649046 | NM_001109171 | 499430    | Lrrc20     | speedy homolog A (Xenopus laevis)                                                                            | 2.76E-02 | -2.2 | 5.86E-02 | NS   | 5.80E-02 | NS  |
| A_42_P529780 | NM_138855    | 192209    | Spdya      | sestrin 1                                                                                                    | 1.12E-03 | -2.2 | 1.13E-01 | NS   | 1.75E-02 | 1.9 |
| A_64_P389571 | NM_001106396 | 294518    | Sesn1      | similar to dimerization cofactor of hepatocyte nuclear factor 1 (HNF1) from muscle                           | 1.37E-02 | -2.2 | 4.81E-01 | NS   | 2.69E-02 | 3.9 |
| A_64_P045128 | BC087670     | 685729    | LOC685729  | Smith-Magenis syndrome chromosome region, candidate 7 homolog (human)                                        | 2.51E-03 | -2.2 | 8.23E-01 | NS   | 3.91E-02 | 1.9 |
| A_44_P447158 | BC081703     |           |            |                                                                                                              | 1.91E-02 | -2.2 | 1.60E-01 | NS   | 1.26E-01 | NS  |
| A_64_P121058 | XM_001077609 | 497916    | Smcr7      | DENN/MADD domain containing 2C                                                                               | 3.39E-02 | -2.2 | 2.53E-01 | NS   | 3.27E-02 | 2.3 |
| A_44_P403088 | XM_002729114 | 295333    | Dennd2c    | natriuretic peptide precursor C                                                                              | 2.31E-02 | -2.2 | 4.85E-01 | NS   | 5.94E-01 | NS  |
| A_44_P240696 | NM_053750    | 114593    | Nppc       |                                                                                                              | 4.91E-03 | -2.1 | 1.01E-02 | -1.7 | 8.24E-01 | NS  |

|               |              |        |            |                                                                                                                   |          |      |          |      |          |     |
|---------------|--------------|--------|------------|-------------------------------------------------------------------------------------------------------------------|----------|------|----------|------|----------|-----|
| A_64_P147774  | XM_001080099 |        |            |                                                                                                                   | 2.47E-02 | -2.1 | 1.54E-01 | NS   | 6.62E-01 | NS  |
| A_64_P351272  | NM_001013994 | 305811 | Rcor2      | REST corepressor 2                                                                                                | 1.21E-02 | -2.1 | 3.04E-02 | -1.5 | 5.47E-01 | NS  |
| A_64_P166514  | BC101919     | 25651  | Selp       | selectin P                                                                                                        | 9.05E-04 | -2.1 | 2.13E-02 | -1.7 | 9.29E-01 | NS  |
| A_44_P552452  | NM_001004084 | 309622 | RT1-Bb     | RT1 class II, locus Bb similar to glyceraldehyde-3-phosphate dehydrogenase (phosphorylating) (EC 1.2.1.12)        | 2.75E-03 | -2.1 | 6.65E-01 | NS   | 1.27E-01 | NS  |
| A_44_P405321  | XM_001078200 | 293876 | RGD1561881 |                                                                                                                   | 1.45E-02 | -2.1 | 4.66E-02 | -1.5 | 4.02E-02 | 2.0 |
| A_44_P1017458 | NM_199402    | 360604 | Spata20    | spermatogenesis associated 20                                                                                     | 4.12E-02 | -2.1 | 6.42E-02 | NS   | 1.80E-01 | NS  |
| A_44_P531758  | NM_012935    | 25420  | Cryab      | crystallin, alpha B                                                                                               | 1.67E-02 | -2.1 | 2.41E-01 | NS   | 4.81E-01 | NS  |
| A_64_P237860  | XM_001080554 |        |            |                                                                                                                   | 3.92E-02 | -2.1 | 6.79E-01 | NS   | 1.13E-01 | NS  |
| A_44_P456792  | NM_053966    | 117036 | Lamc1      | laminin, gamma 1                                                                                                  | 4.13E-02 | -2.1 | 2.91E-01 | NS   | 2.27E-01 | NS  |
| A_64_P009857  | NM_001108322 | 360737 | Tbx1       | T-box 1 receptor (G protein-coupled) activity modifying protein 1 family with sequence similarity 181, member B   | 1.58E-02 | -2.1 | 2.76E-02 | -1.8 | 8.36E-02 | NS  |
| A_64_P022090  | NM_031645    | 58965  | Ramp1      |                                                                                                                   | 2.58E-02 | -2.1 | 2.15E-01 | NS   | 1.72E-01 | NS  |
| A_64_P044295  | NM_001109150 | 499205 | Fam181b    |                                                                                                                   | 3.27E-02 | -2.1 | 1.43E-01 | NS   | 3.85E-01 | NS  |
| A_64_P057603  | NM_001100850 | 311860 | Abl1       | c-abl oncogene 1, receptor tyrosine kinase calcium channel, voltage-dependent, beta 1 subunit                     | 4.28E-02 | -2.1 | 5.44E-01 | NS   | 1.32E-01 | NS  |
| A_43_P11929   | NM_017346    | 50688  | Cacnb1     | similar to solute carrier organic anion transporter family, member 6c1                                            | 3.95E-02 | -2.1 | 6.00E-02 | NS   | 9.03E-02 | NS  |
| A_64_P023880  | XM_001047881 | 501192 | RGD1559925 |                                                                                                                   | 2.24E-02 | -2.1 | 5.99E-01 | NS   | 6.91E-02 | NS  |
| A_64_P107821  | NM_001047881 | 307404 | Arsi       | arylsulfatase family, member I                                                                                    | 4.64E-02 | -2.1 | 1.21E-02 | -1.7 | 8.57E-02 | NS  |
| A_64_P159110  | XM_001054995 | 502160 | Lvrn       | laeverin                                                                                                          | 1.10E-02 | -2.1 | 3.34E-01 | NS   | 3.78E-02 | 2.1 |
| A_43_P10269   | NM_001025712 | 317218 | Itm2a      | integral membrane protein 2A                                                                                      | 4.21E-02 | -2.1 | 1.07E-01 | NS   | 6.94E-02 | NS  |
| A_43_P13147   | NM_131908    | 170700 | Fgf6       | fibroblast growth factor 6                                                                                        | 2.14E-03 | -2.1 | 5.19E-01 | NS   | 1.04E-01 | NS  |
| A_44_P1037953 | NM_031511    | 24483  | Igf2       | insulin-like growth factor 2                                                                                      | 1.44E-02 | -2.1 | 4.00E-03 | -1.9 | 5.91E-02 | NS  |
| A_44_P192000  | NM_001044231 | 292793 | Sbsn       | suprabasin                                                                                                        | 2.70E-02 | -2.1 | 7.99E-02 | NS   | 6.99E-02 | NS  |
| A_44_P158758  | NM_053816    | 116506 | Calcr      | calcitonin receptor                                                                                               | 1.01E-02 | -2.1 | 1.13E-02 | -2.7 | 5.51E-01 | NS  |
| A_44_P822989  | XM_001070627 | 498650 | Rab11fip1  | RAB11 family interacting protein 1 (class I)                                                                      | 2.12E-02 | -2.1 | 5.89E-01 | NS   | 7.98E-01 | NS  |
| A_64_P147403  | XM_346994    | 361629 | RGD1565926 | RGD1565926                                                                                                        | 1.02E-02 | -2.1 | 4.14E-02 | -1.8 | 8.18E-02 | NS  |
| A_44_P541456  | NM_001106615 | 297518 | Arcp4      | actin related protein 2/3 complex, subunit 4                                                                      | 4.19E-02 | -2.1 | 1.35E-01 | NS   | 1.96E-01 | NS  |
| A_44_P299247  | NM_012778    | 25240  | Aqp1       | aquaporin 1                                                                                                       | 3.16E-02 | -2.1 | 3.10E-01 | NS   | 1.66E-02 | 1.9 |
| A_64_P157371  | NM_019358    | 54320  | Pdpr       | podoplanin                                                                                                        | 2.80E-02 | -2.1 | 3.15E-01 | NS   | 3.14E-01 | NS  |
| A_44_P456689  | NM_001109904 | 25114  | Fgfr4      | fibroblast growth factor receptor 4 solute carrier family 1 (glial high affinity glutamate transporter), member 2 | 1.28E-02 | -2.1 | 2.19E-02 | -2.2 | 4.55E-02 | 2.1 |
| A_64_P031123  | NM_001035233 | 29482  | Slc1a2     | chaperone, ABC1 activity of bc1 complex homolog (S. pombe)                                                        | 2.28E-03 | -2.1 | 2.11E-01 | NS   | 1.87E-01 | NS  |
| A_44_P165999  | NM_001013185 | 360887 | Cabc1      |                                                                                                                   | 8.39E-03 | -2.1 | 5.40E-02 | NS   | 3.08E-02 | 2.1 |
| A_64_P092891  | XM_001056859 | 499660 | Sprr1al    | small proline-rich protein 1A-like                                                                                | 2.67E-02 | -2.1 | 4.55E-01 | NS   | 1.64E-01 | NS  |
| A_44_P182195  | NM_012677    | 24841  | Ton        | tonin                                                                                                             | 2.55E-02 | -2.1 | 1.01E-02 | -2.5 | 5.14E-01 | NS  |
| A_44_P553267  | XM_002727615 |        |            |                                                                                                                   | 1.05E-02 | -2.1 | 2.59E-01 | NS   | 9.47E-01 | NS  |
| A_64_P098449  | NM_021698    | 60327  | F13a1      | coagulation factor XIII, A1 polypeptide                                                                           | 2.15E-02 | -2.0 | 2.61E-01 | NS   | 1.87E-01 | NS  |
| A_64_P080582  | NM_001108461 | 361466 | Tppp       | tubulin polymerization promoting protein protein tyrosine phosphatase, receptor type, J                           | 6.24E-03 | -2.0 | 8.72E-01 | NS   | 9.02E-01 | NS  |
| A_44_P332780  | NM_017269    | 29645  | Ptprj      |                                                                                                                   | 4.80E-02 | -2.0 | 7.88E-01 | NS   | 7.91E-01 | NS  |
| A_43_P11923   | NM_017337    | 50678  | Pde3a      | phosphodiesterase 3A, cGMP inhibited sarcoglycan, gamma (dystrophin-associated glycoprotein)                      | 3.79E-02 | -2.0 | 2.01E-01 | NS   | 5.01E-01 | NS  |
| A_43_P14597   | NM_001006993 | 305941 | Sgcg       |                                                                                                                   | 1.22E-02 | -2.0 | 2.94E-02 | -1.8 | 8.93E-02 | NS  |
| A_44_P109455  | NM_177426    | 24424  | Gstm2      | glutathione S-transferase mu 2 glucose-fructose oxidoreductase domain containing 1                                | 2.41E-02 | -2.0 | 2.80E-02 | -2.0 | 1.56E-02 | 2.7 |
| A_43_P20986   | NM_001170334 | 306842 | Gfod1      |                                                                                                                   | 3.97E-02 | -2.0 | 2.81E-01 | NS   | 9.04E-01 | NS  |
| A_64_P137679  | NM_001134513 | 295446 | Tbck       | TBC1 domain containing kinase                                                                                     | 1.35E-02 | -2.0 | 4.45E-01 | NS   | 7.63E-01 | NS  |
| A_64_P101425  | XR_008828    | 290372 | RGD1560137 | similar to expressed sequence AU021034                                                                            | 3.01E-02 | -2.0 | 5.36E-01 | NS   | 6.65E-01 | NS  |
| A_44_P579385  | XM_574618    | 191572 | Ahnak      | AHNAK nucleoprotein                                                                                               | 4.66E-02 | -2.0 | 7.47E-01 | NS   | 5.85E-01 | NS  |
| A_44_P840891  | XM_001079346 | 499415 | Icoslg     | inducible T-cell co-stimulator ligand gamma-aminobutyric acid (GABA) B receptor 1                                 | 1.79E-02 | -2.0 | 6.67E-02 | NS   | 7.97E-01 | NS  |
| A_64_P089421  | NM_031028    | 81657  | Gabbr1     |                                                                                                                   | 5.43E-03 | -2.0 | 7.48E-01 | NS   | 8.01E-01 | NS  |
| A_44_P325189  | NM_175578    | 140666 | Rcan2      | regulator of calcineurin 2                                                                                        | 9.49E-03 | -2.0 | 1.23E-01 | NS   | 2.63E-02 | 3.3 |

|               |              |        |            |                                                                                                                                 |          |      |          |      |          |      |
|---------------|--------------|--------|------------|---------------------------------------------------------------------------------------------------------------------------------|----------|------|----------|------|----------|------|
| A_64_P000023  | NM_032078    | 689560 | Ryr2       | ryanodine receptor 2, cardiac                                                                                                   | 3.36E-02 | -2.0 | 3.09E-01 | NS   | 8.97E-02 | NS   |
| A_64_P068648  | NM_001107971 | 313554 | Foxj3      | forkhead box J3                                                                                                                 | 1.13E-02 | -2.0 | 7.14E-01 | NS   | 4.60E-02 | 1.6  |
| A_44_P507911  | NM_139230    | 246172 | Nexn       | nexilin (F actin binding protein)                                                                                               | 3.63E-02 | -2.0 | 1.54E-01 | NS   | 1.06E-01 | NS   |
| A_42_P834031  | NM_001105871 | 288025 | Hrasls     | HRAS-like suppressor                                                                                                            | 3.11E-02 | -2.0 | 9.43E-02 | NS   | 6.66E-02 | NS   |
| A_44_P536757  | NM_001107735 | 311129 | Osbp16     | oxysterol binding protein-like 6<br>sulfotransferase family, cytosolic, 1C,<br>member 2a                                        | 4.29E-02 | -2.0 | 1.74E-03 | -1.4 | 2.29E-01 | NS   |
| A_44_P958682  | NM_001013177 | 316153 | Sult1c2a   |                                                                                                                                 | 3.11E-02 | -2.0 | 7.76E-01 | NS   | 5.34E-01 | NS   |
| A_64_P014376  | AABR03073588 |        |            |                                                                                                                                 | 2.52E-02 | -2.0 | 2.61E-01 | NS   | 4.78E-02 | 2.5  |
| A_42_P648800  | AA998304     |        |            |                                                                                                                                 | 2.52E-02 | -2.0 | 5.76E-01 | NS   | 1.68E-01 | NS   |
| A_64_P020706  | XM_001061909 | 295274 | Hist2h2be  | histone cluster 2, H2be                                                                                                         | 3.19E-02 | -2.0 | 3.98E-01 | NS   | 4.48E-01 | NS   |
| A_42_P586141  | NM_0017035   | 24655  | Plcd1      | phospholipase C, delta 1                                                                                                        | 3.94E-02 | -2.0 | 4.34E-02 | -1.3 | 3.17E-02 | 2.2  |
| A_64_P066621  | XM_001063707 | 312897 | Msc        | musculin                                                                                                                        | 4.17E-02 | -2.0 | 2.96E-01 | NS   | 7.99E-03 | 2.2  |
| A_44_P425058  | NM_031653    | 58982  | Ncan       | neurocan                                                                                                                        | 8.55E-03 | -2.0 | 7.81E-01 | NS   | 6.98E-01 | NS   |
| A_44_P520929  | NM_001007675 | 303701 | C1qtnf1    | C1q and tumor necrosis factor related<br>protein 1                                                                              | 4.08E-02 | -2.0 | 1.05E-01 | NS   | 6.40E-02 | NS   |
| A_64_P137932  | NM_031794    | 308444 | Axl        | Axl receptor tyrosine kinase                                                                                                    | 1.69E-02 | -2.0 | 3.44E-01 | NS   | 4.49E-01 | NS   |
| A_64_P157229  | XM_001072745 | 311639 | Zfp334     | zinc finger protein 334                                                                                                         | 3.23E-02 | -2.0 | 8.87E-01 | NS   | 3.44E-01 | NS   |
| A_64_P053392  | NM_001144859 | 292199 | LOC292199  | hypothetical LOC292199                                                                                                          | 1.55E-02 | -2.0 | 4.92E-02 | -1.8 | 1.25E-01 | NS   |
| A_64_P041228  | NM_001106455 | 295325 | Igsf3      | immunoglobulin superfamily, member 3                                                                                            | 1.41E-02 | -2.0 | 9.60E-01 | NS   | 4.13E-01 | NS   |
| A_64_P100389  | NM_001106774 | 299694 | Nuak1      | NUAK family, SNF1-like kinase, 1                                                                                                | 7.52E-03 | -2.0 | 6.14E-01 | NS   | 6.19E-01 | NS   |
| A_43_P19341   | XM_342827    |        |            |                                                                                                                                 | 4.59E-02 | -2.0 | 3.85E-01 | NS   | 4.23E-01 | NS   |
| A_44_P125069  | XM_001074013 | 362246 | Tp53inp2   | tumor protein p53 inducible nuclear protein<br>2                                                                                | 4.54E-02 | -2.0 | 2.62E-01 | NS   | 5.19E-02 | NS   |
| A_44_P665075  | NM_001025720 | 361272 | Dhtkd1     | dehydrogenase E1 and transketolase<br>domain containing 1                                                                       | 3.82E-02 | -2.0 | 5.66E-01 | NS   | 5.03E-01 | NS   |
| A_44_P541384  | NM_001106164 | 291813 | Cmtm3      | CKLF-like MARVEL transmembrane<br>domain containing 3                                                                           | 4.71E-02 | -1.9 | 8.85E-02 | NS   | 1.05E-01 | NS   |
| A_44_P317287  | NM_031694    | 64441  | Hsf2       | heat shock transcription factor 2                                                                                               | 3.35E-02 | -1.9 | 2.62E-01 | NS   | 1.27E-01 | NS   |
| A_43_P22972   | XM_001075116 | 690657 | Tmem71     | transmembrane protein 71                                                                                                        | 2.16E-03 | -1.9 | 1.46E-01 | NS   | 7.97E-01 | NS   |
| A_64_P045007  | NM_001100666 | 295105 | Schip1     | schwannomin interacting protein 1                                                                                               | 3.39E-02 | -1.9 | 1.23E-01 | NS   | 1.18E-01 | NS   |
| A_43_P11040   | NM_001009639 | 291966 | Tppp3      | tubulin polymerization-promoting protein<br>family member 3                                                                     | 8.76E-03 | -1.9 | 9.83E-02 | NS   | 1.48E-01 | NS   |
| A_64_P020152  | NM_001109382 | 679921 | Vasn       | vasorin                                                                                                                         | 2.96E-02 | -1.9 | 4.23E-02 | -1.2 | 1.82E-01 | NS   |
| A_64_P133355  | NM_001012349 | 296635 | Ppapdc3    | phosphatidic acid phosphatase type 2<br>domain containing 3                                                                     | 4.34E-02 | -1.9 | 3.25E-02 | -2.2 | 1.45E-01 | NS   |
| A_44_P538789  | XM_222813    |        |            |                                                                                                                                 | 1.01E-02 | -1.9 | 5.02E-02 | NS   | 1.45E-02 | 2.2  |
| A_44_P1011780 | NM_001108565 | 362039 | Pla2g12a   | phospholipase A2, group XIIA                                                                                                    | 2.85E-03 | -1.9 | 1.70E-02 | -1.9 | 1.43E-01 | NS   |
| A_44_P450440  | NM_001048215 | 315546 | Kirrel3    | kin of IRRE like 3 (Drosophila)                                                                                                 | 4.01E-02 | -1.9 | 6.44E-01 | NS   | 1.11E-01 | NS   |
| A_64_P101908  | XR_085779    | 688582 | LOC688582  | similar to hemicentin 1                                                                                                         | 1.08E-02 | -1.9 | 1.69E-01 | NS   | 1.76E-01 | NS   |
| A_64_P140836  | NM_001017486 | 498174 | Gbas       | glioblastoma amplified sequence                                                                                                 | 4.66E-02 | -1.9 | 1.10E-01 | NS   | 8.49E-02 | NS   |
| A_64_P031481  | NM_001107172 | 304784 | Slc26a9    | solute carrier family 26, member 9                                                                                              | 1.95E-02 | -1.9 | 9.50E-02 | NS   | 3.29E-02 | -2.2 |
| A_64_P084525  | NM_001101001 | 680115 | Ptpla      | protein tyrosine phosphatase-like (proline<br>instead of catalytic arginine), member a<br>receptor (G protein-coupled) activity | 4.74E-02 | -1.9 | 3.35E-02 | -2.1 | 4.62E-01 | NS   |
| A_64_P159404  | NM_031645    | 58965  | Ramp1      | modifying protein 1                                                                                                             | 3.67E-02 | -1.9 | 1.50E-01 | NS   | 7.14E-02 | NS   |
| A_44_P325599  | NM_212499    | 309611 | G7c        | G7c protein                                                                                                                     | 7.41E-03 | -1.9 | 1.24E-01 | NS   | 4.18E-01 | NS   |
| A_42_P588504  | XM_575808    | 500446 | RGD1559864 | similar to mKIAA1045 protein                                                                                                    | 3.86E-02 | -1.9 | 2.02E-01 | NS   | 9.33E-01 | NS   |
| A_42_P716750  | NM_001024757 | 297930 | Wwp1       | WW domain containing E3 ubiquitin protein<br>ligase 1                                                                           | 4.60E-02 | -1.9 | 2.65E-01 | NS   | 1.43E-01 | NS   |
| A_44_P449819  | NM_053851    | 116600 | Cacnb2     | calcium channel, voltage-dependent, beta 2<br>subunit                                                                           | 4.84E-02 | -1.9 | 2.45E-01 | NS   | 2.17E-01 | NS   |
| A_44_P700105  | NM_001108495 | 361615 | Relt       | RELT tumor necrosis factor receptor                                                                                             | 4.49E-02 | -1.9 | 1.01E-01 | NS   | 8.21E-02 | NS   |
| A_44_P290187  | NM_053544    | 89803  | Sfrp4      | secreted frizzled-related protein 4                                                                                             | 1.45E-02 | -1.9 | 2.28E-01 | NS   | 3.92E-01 | NS   |
| A_44_P157408  | NM_013027    | 25545  | Sepw1      | selenoprotein W, 1                                                                                                              | 7.53E-03 | -1.9 | 8.87E-02 | NS   | 8.43E-02 | NS   |
| A_44_P328767  | NM_001007709 | 315141 | Smcr7l     | Smith-Magenis syndrome chromosome<br>region, candidate 7-like (human)                                                           | 1.44E-02 | -1.9 | 2.14E-01 | NS   | 8.01E-01 | NS   |
| A_64_P077871  | XR_009614    |        |            |                                                                                                                                 | 1.81E-02 | -1.9 | 5.87E-01 | NS   | 2.77E-01 | NS   |
| A_64_P089950  | NM_001039686 | 297419 | Gkn2       | gastrokine 2                                                                                                                    | 3.71E-02 | -1.9 | 1.11E-01 | NS   | 4.32E-02 | -1.6 |
| A_44_P476088  | NM_001106830 | 300776 | Iqch       | IQ motif containing H                                                                                                           | 1.16E-02 | -1.9 | 1.13E-01 | NS   | 6.11E-02 | NS   |
| A_64_P081045  | XM_001067781 | 688657 | LOC688657  | similar to Olfactory receptor 5D13                                                                                              | 1.68E-02 | -1.9 | 1.50E-02 | 1.7  | 3.66E-02 | -2.0 |

|              |              |        |            |                                                                                                                       |          |      |          |      |          |     |
|--------------|--------------|--------|------------|-----------------------------------------------------------------------------------------------------------------------|----------|------|----------|------|----------|-----|
| A_44_P295187 | NM_001107308 | 306357 | Gmip       | Gem-interacting protein                                                                                               | 4.53E-02 | -1.9 | 2.07E-01 | NS   | 1.04E-01 | NS  |
| A_44_P387308 | NM_001034012 | 310670 | Adamts14   | ADAMTS-like 4                                                                                                         | 3.19E-02 | -1.9 | 6.83E-02 | NS   | 6.01E-02 | NS  |
| A_64_P127808 | NM_022269    | 64036  | Cd55       | Cd55 molecule                                                                                                         | 4.06E-03 | -1.9 | 9.82E-02 | NS   | 7.74E-02 | NS  |
| A_64_P164784 | NM_001135713 | 309433 | Sec31b     | SEC31 homolog B ( <i>S. cerevisiae</i> )<br>cytochrome P450, family 2, subfamily c,<br>polypeptide 23                 | 1.76E-02 | -1.9 | 1.15E-01 | NS   | 6.66E-02 | NS  |
| A_42_P514057 | NM_031839    | 83790  | Cyp2c23    |                                                                                                                       | 1.45E-02 | -1.9 | 4.62E-01 | NS   | 4.25E-02 | 1.5 |
| A_64_P092584 | M59313       |        |            |                                                                                                                       | 2.36E-02 | -1.8 | 5.61E-01 | NS   | 5.43E-02 | NS  |
| A_42_P717175 | NM_001013428 | 298579 | Pla2g2d    | phospholipase A2, group IID                                                                                           | 4.90E-03 | -1.8 | 6.26E-01 | NS   | 2.90E-01 | NS  |
| A_64_P105073 | NM_001106662 | 298141 | Frmd3      | FERM domain containing 3                                                                                              | 2.58E-02 | -1.8 | 3.25E-01 | NS   | 6.57E-01 | NS  |
| A_64_P121796 | NM_001108001 | 313776 | RGD1304931 | similar to RIKEN cDNA 2310042D19                                                                                      | 1.58E-02 | -1.8 | 6.00E-02 | NS   | 8.60E-02 | NS  |
| A_64_P033456 | NM_031070    | 81734  | Nell2      | NEL-like 2 (chicken)                                                                                                  | 3.02E-02 | -1.8 | 6.10E-01 | NS   | 6.13E-02 | NS  |
| A_44_P898436 | NM_001025155 | 502715 | Lrrc17     | leucine rich repeat containing 17                                                                                     | 2.29E-02 | -1.8 | 4.05E-02 | -1.4 | 5.32E-02 | NS  |
| A_44_P241398 | NM_001106607 | 297433 | Podxl2     | podocalyxin-like 2                                                                                                    | 1.75E-02 | -1.8 | 7.05E-02 | NS   | 9.08E-02 | NS  |
| A_43_P14648  | NM_001012034 | 305235 | Art3       | ADP-ribosyltransferase 3<br>XK, Kell blood group complex subunit-<br>related family, member 6                         | 1.60E-02 | -1.8 | 1.35E-01 | NS   | 1.28E-01 | NS  |
| A_64_P066256 | NM_001012042 | 305960 | Xkr6       | transforming, acidic coiled-coil containing<br>protein 2                                                              | 1.39E-02 | -1.8 | 7.92E-01 | NS   | 8.32E-01 | NS  |
| A_43_P18160  | NM_001004415 | 309025 | Tacc2      | nucleolar protein 3 (apoptosis repressor<br>with CARD domain)                                                         | 4.06E-02 | -1.8 | 4.42E-01 | NS   | 1.12E-01 | NS  |
| A_43_P12832  | NM_053516    | 85383  | Nol3       |                                                                                                                       | 8.16E-03 | -1.8 | 1.06E-01 | NS   | 1.54E-01 | NS  |
| A_64_P026420 | XM_002727417 |        |            |                                                                                                                       | 3.68E-02 | -1.8 | 1.65E-01 | NS   | 1.37E-01 | NS  |
| A_44_P278881 |              | 290019 | RGD1562558 | similar to Cytochrome c, somatic<br>family with sequence similarity 54, member<br>B                                   | 2.40E-02 | -1.8 | 6.63E-01 | NS   | 7.25E-02 | NS  |
| A_64_P107549 | NM_001013935 | 298549 | Fam54b     |                                                                                                                       | 2.93E-02 | -1.8 | 4.13E-01 | NS   | 4.04E-02 | 2.2 |
| A_44_P508917 | XR_008528    | 290341 | LOC290341  | similar to RIKEN cDNA 9430077D24 gene<br>phosphatidylinositol-3,4,5-trisphosphate-<br>dependent Rac exchange factor 1 | 3.79E-02 | -1.8 | 8.31E-01 | NS   | 8.71E-01 | NS  |
| A_44_P288548 | NM_001135718 | 311647 | Prex1      | mannose receptor, C type 1                                                                                            | 4.62E-02 | -1.8 | 7.20E-01 | NS   | 6.14E-01 | NS  |
| A_43_P18738  | NM_001106123 | 291327 | Mrc1       | alcohol dehydrogenase, iron containing, 1                                                                             | 4.76E-02 | -1.8 | 7.17E-02 | NS   | 2.86E-01 | NS  |
| A_44_P412710 | NM_001025423 | 362474 | Adhfe1     | Src homology 3 domain-containing guanine<br>nucleotide exchange factor                                                | 4.42E-02 | -1.8 | 2.28E-01 | NS   | 2.16E-02 | 2.4 |
| A_64_P127873 | XM_001063458 | 310460 | Sgef       | tumor protein p63 regulated 1                                                                                         | 8.55E-03 | -1.8 | 7.75E-01 | NS   | 2.45E-01 | NS  |
| A_44_P142925 | NM_001108320 | 360731 | Tprg1      | cofilin 2, muscle                                                                                                     | 1.42E-02 | -1.8 | 3.76E-01 | NS   | 2.46E-01 | NS  |
| A_44_P315106 | NM_001108982 | 366624 | Cfl2       | glutathione S-transferase, mu 7                                                                                       | 2.49E-02 | -1.8 | 1.71E-01 | NS   | 7.08E-02 | NS  |
| A_42_P716352 | NM_031154    | 81869  | Gstm7      | cadherin 23 (otocadherin)                                                                                             | 2.68E-02 | -1.8 | 7.73E-02 | NS   | 2.96E-02 | 1.9 |
| A_64_P033974 | NM_053644    | 114102 | Cdh23      | ADAMTS-like 5                                                                                                         | 1.10E-02 | -1.8 | 3.45E-02 | -1.6 | 8.81E-01 | NS  |
| A_64_P117891 | NM_001108071 | 314626 | Adamts15   |                                                                                                                       | 1.96E-02 | -1.8 | 2.56E-02 | -1.9 | 3.79E-02 | 2.4 |
| A_64_P393579 | XM_223172    |        |            |                                                                                                                       | 3.22E-02 | -1.8 | 1.35E-01 | NS   | 6.15E-01 | NS  |
| A_44_P378799 | NM_013104    | 25641  | Igfbp6     | insulin-like growth factor binding protein 6<br>immunoglobulin superfamily, DCC<br>subclass, member 4                 | 2.61E-02 | -1.8 | 1.17E-01 | NS   | 7.11E-02 | NS  |
| A_44_P230697 | NM_001108767 | 363081 | Igdcc4     |                                                                                                                       | 2.70E-02 | -1.8 | 1.32E-01 | NS   | 6.84E-02 | NS  |
| A_44_P243534 | NM_001025719 | 361238 | RGD1311307 | similar to 1300014106Rik protein<br>membrane associated guanylate kinase,<br>WW and PDZ domain containing 2           | 3.17E-02 | -1.8 | 3.30E-01 | NS   | 4.56E-02 | 2.7 |
| A_44_P320987 | NM_053621    | 113970 | Magi2      | C1q and tumor necrosis factor related<br>protein 6                                                                    | 2.36E-02 | -1.8 | 2.30E-01 | NS   | 2.77E-01 | NS  |
| A_64_P115706 | NM_001034932 | 315114 | C1qtnf6    |                                                                                                                       | 4.54E-02 | -1.8 | 1.69E-01 | NS   | 1.45E-01 | NS  |
| A_44_P344777 | XM_230014    |        |            |                                                                                                                       | 1.46E-02 | -1.8 | 7.64E-02 | NS   | 2.41E-02 | 2.0 |
| A_44_P273468 | NM_053515    | 85333  | Slc25a4    | solute carrier family 25 (mitochondrial<br>carrier; adenine nucleotide translocator),<br>member 4                     | 1.73E-02 | -1.8 | 6.37E-02 | NS   | 8.42E-02 | NS  |
| A_64_P046091 | XM_001064153 |        |            |                                                                                                                       | 1.03E-02 | -1.8 | 2.81E-01 | NS   | 8.34E-01 | NS  |
| A_64_P140303 | NM_024376    | 79217  | Gja3       | gap junction protein, alpha 3                                                                                         | 1.68E-02 | -1.8 | 3.39E-02 | -1.4 | 2.33E-01 | NS  |
| A_64_P074918 | NM_031623    | 58844  | Grb14      | growth factor receptor bound protein 14                                                                               | 1.35E-02 | -1.8 | 2.31E-01 | NS   | 7.25E-02 | NS  |
| A_44_P257582 | NM_001029901 | 307403 | Csf1r      | colony stimulating factor 1 receptor                                                                                  | 4.90E-02 | -1.8 | 1.08E-01 | NS   | 5.21E-01 | NS  |
| A_43_P20587  | NM_001013233 | 364837 | Gypc       | glycophorin C (Gerbig blood group)                                                                                    | 2.54E-02 | -1.8 | 2.19E-02 | -1.3 | 7.93E-02 | NS  |
| A_64_P036955 | NM_031054    | 81686  | Mmp2       | matrix metalloproteinase 2                                                                                            | 4.93E-02 | -1.8 | 5.70E-02 | NS   | 3.02E-02 | 2.5 |
| A_42_P583245 | XM_002726186 | 362145 | Slc25a12   | solute carrier family 25 (mitochondrial<br>carrier, Aralar), member 12                                                | 8.92E-03 | -1.8 | 1.40E-01 | NS   | 8.23E-02 | NS  |
| A_44_P526866 | NM_053394    | 84410  | Klf5       | Kruppel-like factor 5                                                                                                 | 1.62E-02 | -1.8 | 7.34E-01 | NS   | 1.37E-01 | NS  |
| A_64_P318045 | XM_213086    |        |            |                                                                                                                       | 2.24E-02 | -1.8 | 1.88E-01 | NS   | 6.74E-02 | NS  |

|               |              |        |            |                                                                              |          |      |          |      |          |      |
|---------------|--------------|--------|------------|------------------------------------------------------------------------------|----------|------|----------|------|----------|------|
| A_44_P557673  | NM_001107219 | 305417 | Lgi2       | leucine-rich repeat LGI family, member 2                                     | 4.07E-02 | -1.8 | 2.03E-01 | NS   | 2.15E-01 | NS   |
| A_64_P115907  | NM_001106096 | 290921 | Gdf2       | growth differentiation factor 2                                              | 4.84E-02 | -1.8 | 2.30E-01 | NS   | 5.00E-01 | NS   |
| A_64_P158903  | NM_013153    | 25694  | Has2       | hyaluronan synthase 2                                                        | 1.96E-03 | -1.8 | 5.85E-02 | NS   | 9.20E-01 | NS   |
| A_64_P126230  | NM_001109655 | 791259 | Car14      | carbonic anhydrase 14                                                        | 2.81E-02 | -1.8 | 1.02E-01 | NS   | 6.90E-02 | NS   |
| A_64_P136164  | NM_001037154 | 498847 | Pcdhga3    | protocadherin gamma subfamily A, 3                                           | 4.83E-02 | -1.8 | 5.83E-01 | NS   | 2.30E-02 | -1.8 |
| A_64_P045062  | NM_001106262 | 292918 | Otog       | otogelin                                                                     | 2.05E-02 | -1.8 | 9.88E-01 | NS   | 2.44E-01 | NS   |
| A_64_P010234  | NM_001109615 | 690987 | Gys1       | glycogen synthase 1, muscle                                                  | 6.11E-03 | -1.8 | 7.11E-02 | NS   | 1.11E-01 | NS   |
| A_64_P113692  |              | 498834 | Myo7b      | myosin VIIb                                                                  | 3.74E-03 | -1.8 | 1.61E-01 | NS   | 9.09E-01 | NS   |
| A_64_P105620  | NM_052799    | 24598  | Nos1       | nitric oxide synthase 1, neuronal                                            | 1.52E-02 | -1.8 | 2.19E-01 | NS   | 1.67E-01 | NS   |
| A_64_P026152  | NM_001105734 | 63995  | Dusp10     | dual specificity phosphatase 10                                              | 7.36E-03 | -1.8 | 6.58E-02 | NS   | 1.06E-01 | NS   |
| A_64_P096184  | NM_001110139 | 29693  | Atp2a2     | ATPase, Ca++ transporting, cardiac muscle, slow twitch 2                     | 2.42E-02 | -1.8 | 1.83E-01 | NS   | 1.47E-01 | NS   |
| A_64_P158975  | NM_001109536 | 689388 | Ptx3       | pentraxin related gene                                                       | 3.93E-02 | -1.8 | 4.39E-01 | NS   | 1.27E-01 | NS   |
| A_44_P395928  | NM_001037977 | 304344 | Ap4m1      | adaptor-related protein complex 4, mu 1 subunit                              | 3.33E-02 | -1.8 | 8.61E-01 | NS   | 9.09E-01 | NS   |
| A_44_P436808  | NM_001108161 | 315761 | Cilp       | cartilage intermediate layer protein, nucleotide pyrophosphohydrolase        | 3.78E-02 | -1.8 | 4.69E-01 | NS   | 1.08E-01 | NS   |
| A_44_P337077  | NM_181085    | 300286 | Lhfp1      | lipoma HMGIC fusion partner-like 1                                           | 2.55E-02 | -1.7 | 7.30E-03 | -1.6 | 1.22E-02 | 2.3  |
| A_44_P1042876 | NM_212504    | 294254 | Hspa1b     | heat shock 70kD protein 1B (mapped)                                          | 8.74E-03 | -1.7 | 3.10E-01 | NS   | 3.54E-01 | NS   |
| A_44_P360629  | NM_001000030 | 287501 | Olr1498    | olfactory receptor 1498                                                      | 4.15E-03 | -1.7 | 7.43E-01 | NS   | 3.59E-01 | NS   |
| A_64_P048106  | XM_002726363 | 500037 | Foxp2      | forkhead box P2                                                              | 1.66E-02 | -1.7 | 6.14E-01 | NS   | 5.53E-01 | NS   |
| A_64_P038437  | XM_233371    |        |            |                                                                              | 2.28E-02 | -1.7 | 4.73E-01 | NS   | 7.45E-02 | NS   |
| A_64_P124701  | NM_001106074 | 290655 | Crif1      | cytokine receptor-like factor 1                                              | 4.21E-02 | -1.7 | 1.29E-01 | NS   | 5.72E-02 | NS   |
| A_64_P111225  | NM_001033072 | 500959 | LOC500959  | triosephosphate isomerase                                                    | 3.01E-02 | -1.7 | 5.18E-02 | NS   | 3.02E-02 | 2.3  |
| A_64_P035397  | XM_001066959 | 365298 | Alpk3      | alpha-kinase 3                                                               | 3.91E-02 | -1.7 | 1.20E-01 | NS   | 3.28E-01 | NS   |
| A_64_P000895  | XM_001076338 | 686921 | LOC686921  | hypothetical protein LOC686921                                               | 1.79E-02 | -1.7 | 3.83E-01 | NS   | 3.67E-01 | NS   |
| A_64_P041521  | NM_012945    | 25433  | Hbgef      | heparin-binding EGF-like growth factor                                       | 2.32E-02 | -1.7 | 9.77E-01 | NS   | 7.38E-01 | NS   |
| A_44_P263117  | NM_001107082 | 303828 | Etv5       | ets variant 5                                                                | 3.50E-02 | -1.7 | 9.07E-01 | NS   | 9.57E-01 | NS   |
| A_64_P084643  | NM_001109388 | 680039 | LOC680039  | hypothetical protein LOC680039                                               | 4.94E-02 | -1.7 | 8.24E-01 | NS   | 7.29E-01 | NS   |
| A_64_P246032  | J04197       | 24638  | Pfkfb1     | 6-phosphofructo-2-kinase/fructose-2,6-biphosphatase 1                        | 8.87E-03 | -1.7 | 3.56E-02 | -1.5 | 7.63E-02 | NS   |
| A_44_P534753  | NM_001105800 | 287457 | Zmynd15    | zinc finger, MYND-type containing 15                                         | 1.11E-02 | -1.7 | 1.20E-02 | -1.5 | 4.71E-01 | NS   |
| A_64_P027625  | NM_031765    | 83574  | Rxrg       | retinoid X receptor gamma                                                    | 2.93E-02 | -1.7 | 6.68E-02 | NS   | 9.13E-02 | NS   |
| A_64_P114638  | NM_130431    | 161476 | Hspb2      | heat shock protein beta 2                                                    | 9.64E-03 | -1.7 | 4.93E-02 | -1.5 | 7.64E-02 | NS   |
| A_64_P017871  | NM_001000605 | 404794 | Olr782     | olfactory receptor 782                                                       | 2.37E-02 | -1.7 | 8.14E-01 | NS   | 4.09E-02 | -1.4 |
| A_64_P129273  | NM_001105871 | 288025 | Hrasls     | HRAS-like suppressor                                                         | 4.55E-02 | -1.7 | 1.03E-01 | NS   | 1.23E-01 | NS   |
| A_64_P019037  | NM_001013886 | 291081 | Tubb2b     | tubulin, beta 2b                                                             | 2.89E-02 | -1.7 | 9.56E-02 | NS   | 3.30E-01 | NS   |
| A_64_P007268  | NM_001003710 | 445269 | Gpr77      | G protein-coupled receptor 77                                                | 3.28E-02 | -1.7 | 2.82E-01 | NS   | 3.93E-01 | NS   |
| A_44_P388072  | XM_001054467 |        |            |                                                                              | 1.24E-02 | -1.7 | 1.87E-01 | NS   | 2.27E-02 | 1.8  |
| A_44_P229430  | XM_001060407 | 310005 | Aggf1      | angiogenic factor with G patch and FHA domains 1                             | 4.18E-02 | -1.7 | 1.87E-01 | NS   | 8.26E-02 | NS   |
| A_44_P867671  | XM_226468    | 292017 | Hydin      | hydrocephalus inducing                                                       | 1.90E-02 | -1.7 | 4.86E-01 | NS   | 2.72E-01 | NS   |
| A_64_P030025  | NM_001106484 | 295649 | Fign       | fidgetin                                                                     | 2.88E-02 | -1.7 | 7.91E-01 | NS   | 4.30E-01 | NS   |
| A_42_P572123  | NM_031648    | 58971  | Fxyd1      | FXFD domain-containing ion transport regulator 1                             | 1.89E-02 | -1.7 | 7.72E-02 | NS   | 1.04E-01 | NS   |
| A_44_P527795  | NM_001108125 | 315427 | Sesn3      | sestrin 3                                                                    | 1.13E-02 | -1.7 | 5.07E-01 | NS   | 4.49E-03 | -1.5 |
| A_43_P10303   | NM_001109200 | 499818 | Ppp1r1c    | protein phosphatase 1, regulatory (inhibitor) subunit 1C                     | 4.50E-02 | -1.7 | 1.86E-01 | NS   | 9.04E-02 | NS   |
| A_64_P127572  | NM_001107225 | 305438 | Sorcs2     | sortilin-related VPS10 domain containing receptor 2                          | 3.75E-02 | -1.7 | 2.15E-01 | NS   | 3.36E-01 | NS   |
| A_64_P000849  | XM_001079575 | 304485 | RGD1310788 | similar to RIKEN cDNA 0610039P13                                             | 4.23E-03 | -1.7 | 4.48E-01 | NS   | 5.38E-01 | NS   |
| A_44_P928825  | XM_001065601 | 498638 | Msr1       | macrophage scavenger receptor 1                                              | 2.67E-02 | -1.7 | 1.90E-01 | NS   | 5.84E-01 | NS   |
| A_44_P903850  | NM_001042621 | 365865 | Pip5k1a    | phosphatidylinositol-4-phosphate 5-kinase, type 1, alpha                     | 2.61E-02 | -1.7 | 4.16E-01 | NS   | 1.99E-01 | NS   |
| A_44_P117119  | NM_001014068 | 313521 | Hpd1       | 4-hydroxyphenylpyruvate dioxygenase-like                                     | 7.30E-03 | -1.7 | 3.61E-01 | NS   | 7.21E-01 | NS   |
| A_43_P22351   | NM_001024968 | 288454 | Slc46a3    | solute carrier family 46, member 3                                           | 3.82E-02 | -1.7 | 6.30E-01 | NS   | 2.62E-02 | 2.2  |
| A_64_P018206  | NM_001135833 | 287751 | Lyzl6      | lysozyme-like 6                                                              | 1.49E-02 | -1.7 | 9.15E-01 | NS   | 2.91E-01 | NS   |
| A_64_P009678  | NM_001107810 | 311726 | Pcmt2      | protein-L-isoaspartate (D-aspartate) O-methyltransferase domain containing 2 | 4.79E-02 | -1.7 | 6.51E-01 | NS   | 6.08E-02 | NS   |



|              |               |        |            |                                                                     |          |      |          |      |          |      |
|--------------|---------------|--------|------------|---------------------------------------------------------------------|----------|------|----------|------|----------|------|
| A_42_P682589 | NM_024388     | 79240  | Nr4a1      | nuclear receptor subfamily 4, group A, member 1                     | 3.39E-02 | -1.7 | 1.63E-01 | NS   | 5.87E-02 | NS   |
| A_64_P061345 | NM_001108719  | 362768 | Ttc7b      | tetratricopeptide repeat domain 7B                                  | 3.48E-02 | -1.7 | 3.35E-01 | NS   | 1.51E-01 | NS   |
| A_43_P10061  | NM_0011134699 | 690586 | Ankrd40    | ankyrin repeat domain 40                                            | 4.27E-02 | -1.7 | 2.39E-01 | NS   | 3.35E-01 | NS   |
| A_43_P12586  | NM_031557     | 25527  | Ptgis      | prostaglandin I2 (prostacyclin) synthase                            | 8.16E-03 | -1.7 | 4.53E-02 | -1.3 | 2.18E-01 | NS   |
| A_44_P271941 | NM_001106016  | 289736 | Morc2      | MORC family CW-type zinc finger 2                                   | 3.97E-02 | -1.7 | 3.58E-01 | NS   | 4.42E-01 | NS   |
| A_64_P005659 | NR_003722     | 366057 | Gapdh-ps1  | glyceraldehyde-3-phosphate dehydrogenase, pseudogene 1              | 3.64E-02 | -1.7 | 5.89E-02 | NS   | 1.63E-01 | NS   |
| A_43_P21256  | NM_001083966  | 309812 | Rev3l      | REV3-like, catalytic subunit of DNA polymerase zeta (yeast)         | 1.94E-02 | -1.7 | 8.60E-01 | NS   | 1.44E-01 | NS   |
| A_64_P103615 | NM_001107179  | 304816 | Lmod1      | leiomodulin 1 (smooth muscle)                                       | 1.56E-02 | -1.7 | 9.16E-02 | NS   | 1.37E-01 | NS   |
| A_44_P168514 | XM_001058915  | 310250 | Zfx4       | zinc finger homeobox 4                                              | 3.65E-02 | -1.7 | 1.96E-01 | NS   | 4.97E-02 | 2.0  |
| A_42_P594228 | XM_221100     | 303638 | Abca8a     | ATP-binding cassette, sub-family A (ABC1), member 8a                | 1.19E-02 | -1.7 | 5.77E-02 | NS   | 8.62E-02 | NS   |
| A_64_P047416 | NM_001109501  | 688429 | Arhgap10   | Rho GTPase activating protein 10                                    | 3.35E-02 | -1.7 | 3.83E-02 | -1.3 | 9.14E-02 | NS   |
| A_64_P120912 | NM_001109599  | 690528 | Pou2af1    | POU class 2 associating factor 1                                    | 2.87E-02 | -1.7 | 2.84E-01 | NS   | 2.64E-01 | NS   |
| A_43_P14911  | NM_031512     | 24494  | Il1b       | interleukin 1 beta                                                  | 1.56E-02 | -1.7 | 9.17E-01 | NS   | 6.94E-01 | NS   |
| A_64_P031016 | NM_001037197  | 309429 | Kank1      | KN motif and ankyrin repeat domains 1                               | 4.35E-02 | -1.7 | 5.70E-01 | NS   | 1.53E-01 | NS   |
| A_64_P070002 | XM_233699     |        |            |                                                                     | 4.00E-02 | -1.7 | 2.32E-01 | NS   | 2.38E-02 | 2.2  |
| A_64_P151226 | NM_001012034  | 305235 | Art3       | ADP-ribosyltransferase 3                                            | 4.96E-02 | -1.7 | 8.33E-02 | NS   | 1.04E-01 | NS   |
| A_44_P567088 | NM_001008354  | 311903 | Mrrf       | mitochondrial ribosome recycling factor                             | 2.40E-02 | -1.7 | 7.24E-02 | NS   | 8.98E-02 | NS   |
| A_44_P227221 | XR_086188     | 308021 | Syde2      | synapse defective 1, Rho GTPase, homolog 2 (C. elegans)             | 1.03E-02 | -1.7 | 5.72E-01 | NS   | 1.10E-01 | NS   |
| A_42_P685330 | NM_001127531  | 302671 | Ap1s2      | adaptor-related protein complex 1, sigma 2 subunit                  | 4.25E-03 | -1.7 | 1.10E-01 | NS   | 8.33E-02 | NS   |
| A_64_P104014 | NM_013103     | 25640  | Hnf1b      | HNF1 homeobox B                                                     | 3.04E-02 | -1.7 | 3.47E-01 | NS   | 5.32E-01 | NS   |
| A_64_P030464 | BC168189      | 415089 | Tnxb       | tenascin XB                                                         | 6.19E-03 | -1.7 | 5.19E-02 | NS   | 1.37E-01 | NS   |
| A_64_P007847 | NM_001047909  | 689025 | Mrps28     | mitochondrial ribosomal protein S28                                 | 3.04E-03 | -1.7 | 3.74E-01 | NS   | 6.83E-01 | NS   |
| A_64_P045578 | NM_153471     | 266712 | Rnf40      | ring finger protein 40                                              | 3.32E-02 | -1.7 | 1.56E-01 | NS   | 6.72E-01 | NS   |
| A_44_P179745 | NM_031825     | 83727  | Fbn1       | fibrillin 1                                                         | 4.96E-02 | -1.7 | 4.17E-02 | -1.5 | 1.34E-01 | NS   |
| A_44_P400520 | NM_012866     | 25337  | Nfyc       | nuclear transcription factor-Y gamma                                | 2.63E-02 | -1.7 | 3.74E-01 | NS   | 1.50E-01 | NS   |
| A_64_P028390 | AB008804      |        |            |                                                                     | 3.11E-02 | -1.7 | 8.32E-01 | NS   | 3.90E-02 | -1.9 |
| A_64_P029887 | XM_001053590  | 313346 | RGD1311849 | similar to mKIAA1797 protein                                        | 3.89E-02 | -1.7 | 8.51E-02 | NS   | 4.44E-01 | NS   |
| A_64_P050099 | XM_001069254  | 502091 | RGD1561238 | similar to ring finger protein 122 homolog                          | 1.89E-02 | -1.7 | 1.97E-01 | NS   | 6.61E-01 | NS   |
| A_44_P500708 | NM_001008524  | 362634 | C1qc       | complement component 1, q subcomponent, C chain                     | 4.88E-02 | -1.7 | 7.28E-02 | NS   | 4.71E-02 | 1.5  |
| A_42_P523612 | XM_001056692  | 499497 | Mef2c      | myocyte enhancer factor 2C                                          | 2.00E-02 | -1.7 | 6.23E-02 | NS   | 5.76E-02 | NS   |
| A_64_P312700 | NM_053740     | 114559 | Arhgef7    | Rho guanine nucleotide exchange factor (GEF7)                       | 1.89E-02 | -1.7 | 5.29E-01 | NS   | 2.41E-01 | NS   |
| A_64_P029985 | NM_001106216  | 292409 | Fpr1       | formyl peptide receptor 1                                           | 4.56E-03 | -1.6 | 2.87E-01 | NS   | 1.33E-01 | NS   |
| A_44_P530253 | NM_001029899  | 301460 | Adam23     | ADAM metalloproteinase domain 23                                    | 6.58E-03 | -1.6 | 1.23E-01 | NS   | 4.37E-01 | NS   |
| A_64_P095484 | NM_017038     | 24666  | Ppm1a      | protein phosphatase 1A, magnesium dependent, alpha isoform          | 2.22E-02 | -1.6 | 6.77E-02 | NS   | 2.64E-02 | 1.8  |
| A_64_P114583 | XR_085838     | 313196 | RGD1306148 | similar to KIAA0368                                                 | 4.69E-02 | -1.6 | 9.60E-01 | NS   | 3.31E-01 | NS   |
| A_44_P158798 | NM_053663     | 114122 | Vcan       | versican                                                            | 1.62E-02 | -1.6 | 5.82E-01 | NS   | 4.21E-01 | NS   |
| A_64_P013118 | XM_237274     |        |            |                                                                     | 4.16E-02 | -1.6 | 5.36E-02 | NS   | 4.28E-02 | 2.0  |
| A_44_P481667 | DV716912      |        |            |                                                                     | 3.20E-02 | -1.6 | 1.46E-01 | NS   | 5.23E-02 | NS   |
| A_64_P015922 | NM_001107506  | 308523 | Tshz3      | teashirt zinc finger homeobox 3                                     | 3.75E-02 | -1.6 | 1.59E-02 | -2.0 | 7.40E-01 | NS   |
| A_64_P074914 | NM_001024264  | 314615 | Prtn3      | proteinase 3                                                        | 2.11E-02 | -1.6 | 5.96E-03 | -2.0 | 8.82E-01 | NS   |
| A_42_P463602 | NM_001107592  | 309380 | Loxl4      | lysyl oxidase-like 4                                                | 2.90E-02 | -1.6 | 6.35E-04 | -1.7 | 2.72E-01 | NS   |
| A_44_P156589 | NM_001136241  | 246217 | Ngef       | neuronal guanine nucleotide exchange factor                         | 1.95E-02 | -1.6 | 7.66E-02 | NS   | 7.38E-01 | NS   |
| A_43_P12800  | NM_053410     | 84470  | Gnpat      | glyceronephosphate O-acyltransferase                                | 3.48E-02 | -1.6 | 2.12E-01 | NS   | 2.43E-02 | 2.5  |
| A_44_P441181 | NM_001012118  | 315039 | Osr2       | odd-skipped related 2 (Drosophila)                                  | 9.90E-03 | -1.6 | 1.18E-02 | -1.5 | 6.49E-02 | NS   |
| A_64_P155039 | XM_342445     | 362145 | Slc25a12   | solute carrier family 25 (mitochondrial carrier, Aralar), member 12 | 4.36E-02 | -1.6 | 7.79E-02 | NS   | 6.06E-02 | NS   |
| A_44_P154112 | NM_023991     | 78975  | Prkaa2     | protein kinase, AMP-activated, alpha 2 catalytic subunit            | 1.74E-02 | -1.6 | 4.36E-02 | -1.5 | 1.69E-01 | NS   |

|               |              |        |            |                                                                                                                   |          |      |          |      |          |      |
|---------------|--------------|--------|------------|-------------------------------------------------------------------------------------------------------------------|----------|------|----------|------|----------|------|
| A_44_P182536  | NM_134393    | 171414 | Pmfbp1     | polyamine modulated factor 1 binding protein 1                                                                    | 3.89E-02 | -1.6 | 5.67E-02 | NS   | 3.47E-01 | NS   |
| A_44_P1024065 | NM_053450    | 84580  | Hdac5      | histone deacetylase 5                                                                                             | 2.10E-02 | -1.6 | 4.67E-02 | -1.2 | 7.70E-02 | NS   |
| A_64_P037716  | NM_001109222 | 500036 | Ppp1r3a    | protein phosphatase 1, regulatory (inhibitor) subunit 3A                                                          | 4.23E-02 | -1.6 | 8.05E-02 | NS   | 2.87E-01 | NS   |
| A_44_P431049  | NM_053338    | 83521  | Rrad       | Ras-related associated with diabetes                                                                              | 1.10E-02 | -1.6 | 1.26E-01 | NS   | 3.36E-01 | NS   |
| A_64_P164250  | NM_001009968 | 316940 | Spetex-2F  | Spetex-2F protein                                                                                                 | 2.71E-02 | -1.6 | 7.43E-01 | NS   | 8.36E-01 | NS   |
| A_44_P790674  | XM_573517    | 498289 | Opn3       | opsin 3                                                                                                           | 4.99E-02 | -1.6 | 1.39E-02 | 1.2  | 7.11E-01 | NS   |
| A_44_P427346  | NM_134378    | 171396 | Sulf1      | sulfatase 1                                                                                                       | 7.46E-03 | -1.6 | 4.29E-03 | -1.4 | 2.39E-01 | NS   |
| A_44_P871389  | NM_001109255 | 500364 | Sspn       | sarcospan                                                                                                         | 8.96E-03 | -1.6 | 1.21E-01 | NS   | 1.41E-01 | NS   |
| A_44_P366303  | XM_216941    | 299996 | Matn2      | matrilin 2                                                                                                        | 2.47E-02 | -1.6 | 1.31E-01 | NS   | 1.05E-01 | NS   |
| A_42_P608713  | XM_001066028 | 85420  | Prkcq      | protein kinase C, theta                                                                                           | 4.29E-02 | -1.6 | 1.25E-01 | NS   | 3.25E-02 | 2.6  |
| A_44_P105034  | NM_012822    | 25290  | Alox5      | arachidonate 5-lipoxygenase                                                                                       | 4.77E-03 | -1.6 | 4.44E-01 | NS   | 8.46E-02 | NS   |
| A_64_P100793  | NM_021866    | 60463  | Ccr2       | chemokine (C-C motif) receptor 2                                                                                  | 6.60E-03 | -1.6 | 5.89E-01 | NS   | 8.06E-01 | NS   |
| A_64_P054686  | XR_007683    |        |            |                                                                                                                   | 1.55E-02 | -1.6 | 6.65E-02 | NS   | 1.54E-01 | NS   |
| A_44_P468380  | NM_020094    | 56817  | Kcnp2      | Kv channel-interacting protein 2                                                                                  | 3.86E-02 | -1.6 | 9.17E-01 | NS   | 4.16E-01 | NS   |
| A_64_P127337  | NM_023978    | 78962  | Per3       | period homolog 3 (Drosophila)                                                                                     | 2.25E-02 | -1.6 | 9.65E-01 | NS   | 6.43E-01 | NS   |
| A_64_P100788  | NM_001034107 | 312154 | Ing3       | inhibitor of growth family, member 3                                                                              | 2.69E-02 | -1.6 | 4.61E-01 | NS   | 6.92E-01 | NS   |
| A_64_P120280  | XM_001077411 | 310859 | Tet2       | tet oncogene family member 2                                                                                      | 3.37E-02 | -1.6 | 5.37E-01 | NS   | 1.49E-01 | NS   |
| A_44_P152237  | NM_001025022 | 362535 | RGD1308059 | similar to DNA segment, Chr 4, Brigham & Womens Genetics 0951 expressed ankyrin repeat and SOCS box-containing 18 | 5.00E-02 | -1.6 | 4.35E-02 | -1.4 | 8.89E-02 | NS   |
| A_43_P18638   | NM_001108231 | 316614 | Asb18      |                                                                                                                   | 4.75E-02 | -1.6 | 1.68E-02 | -1.8 | 6.37E-01 | NS   |
| A_64_P154352  | XM_002726524 |        |            |                                                                                                                   | 1.54E-02 | -1.6 | 7.04E-01 | NS   | 2.55E-01 | NS   |
| A_64_P133276  | NM_001107464 | 308212 | Dact2      | dapper, antagonist of beta-catenin, homolog 2 (Xenopus laevis)                                                    | 8.62E-03 | -1.6 | 2.25E-02 | -1.2 | 2.28E-01 | NS   |
| A_42_P633463  | NM_053316    | 50560  | Ip6k1      | inositol hexakisphosphate kinase 1                                                                                | 4.16E-02 | -1.6 | 9.40E-01 | NS   | 2.37E-01 | NS   |
| A_64_P013719  | XM_001071643 | 689685 | LOC689685  | hypothetical protein LOC689685                                                                                    | 3.31E-02 | -1.6 | 6.86E-01 | NS   | 8.24E-01 | NS   |
| A_64_P142631  | NM_001008310 | 294807 | Rxfp3      | relaxin/insulin-like family peptide receptor 3 adaptor-related protein complex 4, beta 1 subunit                  | 2.45E-02 | -1.6 | 1.60E-01 | NS   | 9.56E-04 | -2.6 |
| A_44_P173239  | NM_001107709 | 310746 | Ap4b1      |                                                                                                                   | 3.03E-02 | -1.6 | 1.08E-01 | NS   | 1.38E-01 | NS   |
| A_64_P049356  | XM_001074878 | 686591 | LOC686591  | similar to paraneoplastic antigen MA2                                                                             | 3.44E-02 | -1.6 | 9.02E-01 | NS   | 8.87E-01 | NS   |
| A_44_P324707  | NM_012645    | 24737  | RT1-EC2    | RT1 class Ib, locus EC2                                                                                           | 2.34E-02 | -1.6 | 5.07E-01 | NS   | 8.06E-02 | NS   |
| A_44_P770253  | XM_001058869 | 501128 | RGD1565676 | similar to regulatory factor X domain containing 1                                                                | 3.53E-02 | -1.6 | 3.43E-01 | NS   | 4.09E-01 | NS   |
| A_44_P539312  | NM_001009601 | 316226 | Klc4       | kinesin light chain 4                                                                                             | 2.86E-02 | -1.6 | 3.28E-01 | NS   | 4.36E-01 | NS   |
| A_64_P019545  | NM_001108727 | 362810 | Coq10a     | coenzyme Q10 homolog A (S. cerevisiae)                                                                            | 3.39E-02 | -1.6 | 1.57E-01 | NS   | 2.46E-02 | 2.2  |
| A_64_P131111  | BC081950     |        |            |                                                                                                                   | 4.26E-02 | -1.6 | 6.66E-02 | NS   | 7.29E-01 | NS   |
| A_64_P047496  | XM_002727950 |        |            |                                                                                                                   | 2.27E-02 | -1.6 | 8.25E-01 | NS   | 8.54E-01 | NS   |
| A_43_P12334   | NM_022925    | 360417 | Ptprq      | protein tyrosine phosphatase, receptor type, Q                                                                    | 2.76E-02 | -1.6 | 2.84E-01 | NS   | 2.54E-01 | NS   |
| A_64_P108674  | NM_001109664 | 292739 | RGD1307554 | similar to CG16812-PA                                                                                             | 4.22E-02 | -1.6 | 6.08E-02 | NS   | 1.21E-01 | NS   |
| A_44_P214922  | NM_013155    | 25696  | Vldlr      | very low density lipoprotein receptor                                                                             | 4.93E-02 | -1.6 | 3.46E-02 | -1.6 | 1.48E-01 | NS   |
| A_42_P642575  | NM_001048185 | 298607 | Agmat      | agmatine ureohydrolase (agmatinase)                                                                               | 3.59E-02 | -1.6 | 4.93E-01 | NS   | 1.73E-01 | NS   |
| A_64_P078215  | NM_001106960 | 302656 | Frmpd4     | FERM and PDZ domain containing 4                                                                                  | 4.63E-02 | -1.6 | 6.19E-01 | NS   | 3.21E-01 | NS   |
| A_64_P144587  | XM_001054584 |        |            |                                                                                                                   | 4.90E-03 | -1.6 | 4.49E-01 | NS   | 4.97E-01 | NS   |
| A_42_P772878  | NM_001011936 | 293524 | Bag3       | Bcl2-associated athanogene 3                                                                                      | 3.70E-03 | -1.6 | 1.53E-01 | NS   | 7.58E-02 | NS   |
| A_64_P129263  | NM_013080    | 25613  | Ptprz1     | protein tyrosine phosphatase, receptor-type, Z polypeptide 1                                                      | 2.96E-02 | -1.6 | 8.56E-01 | NS   | 1.75E-02 | 2.6  |
| A_43_P15246   | NM_012636    | 24695  | Pthlh      | parathyroid hormone-like hormone                                                                                  | 2.04E-02 | -1.6 | 7.35E-01 | NS   | 2.36E-01 | NS   |
| A_64_P018116  | XM_001074770 | 686567 | LOC686567  | similar to Epiplakin                                                                                              | 3.56E-02 | -1.6 | 6.11E-01 | NS   | 1.46E-01 | NS   |
| A_44_P320858  | NM_017094    | 25235  | Ghr        | growth hormone receptor                                                                                           | 9.10E-03 | -1.6 | 3.65E-01 | NS   | 1.98E-01 | NS   |
| A_64_P003572  | NM_001106784 | 299802 | Lgr5       | leucine rich repeat containing G protein coupled receptor 5                                                       | 3.90E-02 | -1.6 | 7.19E-01 | NS   | 4.25E-02 | -2.5 |
| A_42_P729743  | NM_022005    | 63847  | Fxyd6      | FXFD domain-containing ion transport regulator 6                                                                  | 2.53E-02 | -1.6 | 1.53E-01 | NS   | 1.21E-01 | NS   |
| A_64_P163633  | XR_005869    | 680774 | LOC680774  | hypothetical protein LOC680774                                                                                    | 1.15E-02 | -1.6 | 6.59E-01 | NS   | 3.67E-01 | NS   |
| A_64_P121692  | XM_001062273 |        |            |                                                                                                                   | 2.00E-02 | -1.6 | 2.53E-01 | NS   | 7.27E-02 | NS   |
| A_44_P450518  | NM_001105790 | 287419 | Rangrf     | RAN guanine nucleotide release factor                                                                             | 1.95E-02 | -1.5 | 2.67E-01 | NS   | 1.14E-01 | NS   |

|               |              |        |            |                                                                                                                                                           |          |      |          |      |          |     |
|---------------|--------------|--------|------------|-----------------------------------------------------------------------------------------------------------------------------------------------------------|----------|------|----------|------|----------|-----|
| A_64_P149482  | NM_153722    | 266762 | Mrgprf     | MAS-related GPR, member F                                                                                                                                 | 3.01E-02 | -1.5 | 1.45E-02 | -1.4 | 9.81E-02 | NS  |
| A_43_P18208   | NM_001107363 | 307081 | Pitrm1     | pitrilysin metallopeptidase 1<br>similar to Zinc finger protein 44 (Zinc finger protein KOX7) (Gonadotropin-inducible transcription repressor 2) (GIOT-2) | 3.03E-02 | -1.5 | 8.61E-01 | NS   | 1.29E-01 | NS  |
| A_44_P145152  | XR_009217    | 299558 | LOC299558  | transcription repressor 2) (GIOT-2)                                                                                                                       | 4.42E-02 | -1.5 | 3.67E-02 | -1.5 | 2.88E-02 | 2.0 |
| A_44_P248090  | NM_001169138 | 292406 | Thbs2      | thrombospondin 2                                                                                                                                          | 2.60E-02 | -1.5 | 1.43E-01 | NS   | 7.38E-03 | 2.0 |
| A_64_P038050  | NM_001169145 | 364224 | Acyp2      | acylphosphatase 2, muscle type                                                                                                                            | 1.33E-02 | -1.5 | 1.13E-01 | NS   | 1.04E-01 | NS  |
| A_64_P090851  | XM_226153    | 307579 | Znf521     | zinc finger protein 521                                                                                                                                   | 4.84E-02 | -1.5 | 4.59E-01 | NS   | 5.21E-01 | NS  |
| A_44_P290559  | NM_001100538 | 298510 | Pabpc4     | poly(A) binding protein, cytoplasmic 4                                                                                                                    | 2.00E-02 | -1.5 | 6.68E-02 | NS   | 8.15E-02 | NS  |
| A_44_P310596  | NM_001014166 | 361749 | Il33       | interleukin 33                                                                                                                                            | 3.05E-02 | -1.5 | 1.70E-01 | NS   | 2.59E-01 | NS  |
| A_44_P992908  | NM_031970    | 24471  | Hspb1      | heat shock protein 1                                                                                                                                      | 1.49E-02 | -1.5 | 3.23E-02 | -1.6 | 1.79E-01 | NS  |
| A_43_P15824   | NM_031554    | 25366  | Acvr2b     | activin A receptor, type IIB                                                                                                                              | 2.82E-02 | -1.5 | 1.28E-01 | NS   | 9.30E-01 | NS  |
| A_64_P068598  | XR_009333    |        |            |                                                                                                                                                           | 3.28E-02 | -1.5 | 3.93E-02 | -1.5 | 2.49E-02 | 1.9 |
| A_64_P051099  | NM_001105967 | 289201 | Lmx1a      | LIM homeobox transcription factor 1 alpha                                                                                                                 | 1.00E-02 | -1.5 | 3.32E-02 | -1.2 | 8.08E-01 | NS  |
| A_64_P012868  | NR_024118    | 25602  | Tnxa       | tenascin XA<br>musculoskeletal, embryonic nuclear protein 1                                                                                               | 2.01E-02 | -1.5 | 5.49E-02 | NS   | 1.72E-01 | NS  |
| A_42_P808945  | NM_181368    | 290553 | Mustn1     |                                                                                                                                                           | 4.58E-02 | -1.5 | 2.22E-01 | NS   | 1.92E-01 | NS  |
| A_64_P109719  | BF284891     |        |            |                                                                                                                                                           | 3.05E-02 | -1.5 | 8.19E-01 | NS   | 6.61E-02 | NS  |
| A_64_P020627  | NM_031623    | 58844  | Grb14      | growth factor receptor bound protein 14                                                                                                                   | 2.46E-02 | -1.5 | 1.61E-01 | NS   | 1.10E-01 | NS  |
| A_44_P482700  | NM_001106225 | 292597 | Tyh1       | tweety homolog 1 (Drosophila)                                                                                                                             | 4.16E-02 | -1.5 | 8.37E-01 | NS   | 2.76E-01 | NS  |
| A_64_P065857  | NM_012888    | 25360  | Tshr       | thyroid stimulating hormone receptor<br>guanine nucleotide binding protein, alpha 15                                                                      | 4.52E-02 | -1.5 | 1.53E-01 | NS   | 2.22E-01 | NS  |
| A_44_P438060  | NM_053542    | 89788  | Gna15      |                                                                                                                                                           | 8.55E-03 | -1.5 | 1.21E-01 | NS   | 1.57E-01 | NS  |
| A_44_P682992  | FM112215     | 680521 | LOC680521  | hypothetical protein LOC680521                                                                                                                            | 4.61E-02 | -1.5 | 4.19E-01 | NS   | 2.06E-01 | NS  |
| A_42_P549271  | NM_001107598 | 309440 | Mrpl43     | mitochondrial ribosomal protein L43                                                                                                                       | 2.62E-02 | -1.5 | 3.44E-01 | NS   | 9.03E-02 | NS  |
| A_64_P033121  | XM_002724808 |        |            |                                                                                                                                                           | 2.55E-02 | -1.5 | 1.38E-02 | -1.3 | 4.21E-01 | NS  |
| A_44_P403458  | NM_001108234 | 316642 | Neu4       | sialidase 4                                                                                                                                               | 3.77E-02 | -1.5 | 7.86E-01 | NS   | 8.35E-01 | NS  |
| A_44_P226928  | NM_022940    | 65034  | Pdzd2      | PDZ domain containing 2                                                                                                                                   | 3.11E-02 | -1.5 | 1.57E-01 | NS   | 3.56E-01 | NS  |
| A_43_P15620   | XM_002726072 |        |            |                                                                                                                                                           | 3.71E-02 | -1.5 | 1.81E-01 | NS   | 4.24E-01 | NS  |
| A_64_P043164  | XM_001062865 | 282583 | Fbin2      | fibulin 2                                                                                                                                                 | 1.98E-02 | -1.5 | 2.63E-01 | NS   | 1.41E-01 | NS  |
| A_64_P070288  | XM_344418    |        |            |                                                                                                                                                           | 4.18E-02 | -1.5 | 2.31E-02 | -1.5 | 6.19E-02 | NS  |
| A_64_P136432  | NM_001007757 | 363496 | Armcx6     | armadillo repeat containing, X-linked 6<br>solute carrier family 16 (monocarboxylic acid transporters), member 10                                         | 2.89E-02 | -1.5 | 5.67E-01 | NS   | 7.30E-01 | NS  |
| A_44_P226315  | NM_138831    | 170566 | Slc16a10   |                                                                                                                                                           | 3.29E-02 | -1.5 | 1.63E-01 | NS   | 2.60E-01 | NS  |
| A_64_P067593  | NM_053774    | 115771 | Usp2       | ubiquitin specific peptidase 2<br>CDC42 effector protein (Rho GTPase binding) 1                                                                           | 2.98E-02 | -1.5 | 4.87E-02 | -1.3 | 5.99E-01 | NS  |
| A_64_P149461  | NM_001079700 | 315121 | Cdc42ep1   |                                                                                                                                                           | 2.64E-02 | -1.5 | 2.51E-01 | NS   | 4.30E-01 | NS  |
| A_44_P244040  | NM_001013924 | 296462 | Gtbp5      | GTP binding protein 5                                                                                                                                     | 1.94E-02 | -1.5 | 9.93E-01 | NS   | 6.77E-02 | NS  |
| A_43_P22048   | XM_227694    | 310859 | Tet2       | tet oncogene family member 2                                                                                                                              | 3.47E-02 | -1.5 | 3.45E-01 | NS   | 2.02E-01 | NS  |
| A_44_P359032  | NM_001106694 | 298575 | Pink1      | PTEN induced putative kinase 1                                                                                                                            | 1.44E-02 | -1.5 | 4.07E-02 | -1.4 | 7.32E-02 | NS  |
| A_64_P165085  | NM_001033757 | 246060 | Cdkn1c     | cyclin-dependent kinase inhibitor 1C                                                                                                                      | 2.45E-02 | -1.5 | 1.78E-01 | NS   | 1.25E-01 | NS  |
| A_64_P031610  | XR_085895    |        |            |                                                                                                                                                           | 3.64E-02 | -1.5 | 1.36E-01 | NS   | 6.96E-01 | NS  |
| A_64_P094135  | NM_001107374 | 307249 | RGD1308601 | similar to hypothetical protein<br>latent transforming growth factor beta binding protein 4                                                               | 2.27E-02 | -1.5 | 7.01E-01 | NS   | 9.54E-01 | NS  |
| A_44_P107535  | NM_001170336 | 292734 | Ltbp4      |                                                                                                                                                           | 2.45E-02 | -1.5 | 3.65E-01 | NS   | 4.66E-02 | 2.1 |
| A_44_P443235  | NM_001011957 | 296102 | Eli3       | elongation factor RNA polymerase II-like 3<br>similar to Homeobox protein cut-like 2                                                                      | 8.03E-03 | -1.5 | 3.43E-01 | NS   | 1.49E-01 | NS  |
| A_64_P012877  | XM_222184    | 688301 | LOC688301  | (Homeobox protein Cux-2) (Cut-like 2)                                                                                                                     | 7.37E-03 | -1.5 | 3.91E-01 | NS   | 2.68E-01 | NS  |
| A_44_P1007841 | XM_002724759 |        |            |                                                                                                                                                           | 3.17E-02 | -1.5 | 6.43E-01 | NS   | 4.42E-01 | NS  |
| A_64_P133479  | NM_001006984 | 299738 | Vezt       | vezatin, adherens junctions<br>transmembrane protein                                                                                                      | 9.02E-03 | -1.5 | 4.62E-02 | -1.3 | 6.76E-02 | NS  |
| A_44_P159355  | XM_342878    | 362559 | Zyg11b     | zyg-11 homolog B (C. elegans)                                                                                                                             | 1.19E-02 | -1.5 | 5.39E-02 | NS   | 2.17E-01 | NS  |
| A_64_P002156  | NM_053453    | 84583  | Rgs2       | regulator of G-protein signaling 2                                                                                                                        | 3.42E-02 | -1.5 | 5.76E-01 | NS   | 5.20E-01 | NS  |
| A_64_P235751  | NM_001100538 | 298510 | Pabpc4     | poly(A) binding protein, cytoplasmic 4                                                                                                                    | 3.21E-02 | -1.5 | 1.04E-01 | NS   | 9.16E-02 | NS  |
| A_64_P005744  | XM_215252    |        |            |                                                                                                                                                           | 4.09E-02 | -1.5 | 8.46E-03 | -1.5 | 5.24E-02 | NS  |
| A_64_P069051  | NM_012800    | 25265  | P2ry1      | purinergic receptor P2Y, G-protein coupled, 1                                                                                                             | 3.41E-02 | -1.5 | 1.31E-01 | NS   | 3.48E-02 | 2.5 |
| A_44_P245616  | XM_213954    | 25494  | Nid1       | nidogen 1                                                                                                                                                 | 3.96E-02 | -1.5 | 6.81E-02 | NS   | 8.96E-01 | NS  |
| A_44_P392234  | NM_022182    | 29348  | Fgf7       | fibroblast growth factor 7                                                                                                                                | 2.62E-02 | -1.5 | 5.84E-01 | NS   | 1.53E-01 | NS  |

|              |              |        |            |                                                                                                              |          |      |          |      |          |      |
|--------------|--------------|--------|------------|--------------------------------------------------------------------------------------------------------------|----------|------|----------|------|----------|------|
| A_42_P619926 | NM_001106578 | 296787 | Sema3c     | sema domain, immunoglobulin domain (Ig), short basic domain, secreted, (semaphorin) 3C                       | 7.43E-03 | -1.5 | 1.16E-01 | NS   | 4.94E-01 | NS   |
| A_64_P098374 | NM_001107980 | 313589 | Rspo1      | R-spondin homolog (Xenopus laevis)                                                                           | 2.73E-02 | -1.5 | 4.04E-02 | -1.3 | 9.25E-02 | NS   |
| A_64_P061797 | NM_013198    | 25750  | Maob       | monoamine oxidase B                                                                                          | 2.43E-02 | -1.5 | 5.09E-01 | NS   | 6.44E-01 | NS   |
| A_64_P162743 | NM_001014124 | 360699 | Dnajc28    | DnaJ (Hsp40) homolog, subfamily C, member 28                                                                 | 1.43E-02 | -1.5 | 8.75E-01 | NS   | 3.49E-02 | 1.7  |
| A_44_P545867 | NM_001105934 | 288702 | Unc119b    | unc-119 homolog B (C. elegans)                                                                               | 3.33E-02 | -1.5 | 8.00E-01 | NS   | 3.62E-02 | -1.4 |
| A_44_P302675 | NM_001107036 | 303413 | Mpo        | myeloperoxidase                                                                                              | 4.50E-02 | -1.5 | 9.58E-01 | NS   | 4.08E-01 | NS   |
| A_64_P027634 | NM_001000223 | 293421 | Olr285     | olfactory receptor 285                                                                                       | 7.05E-03 | -1.5 | 6.38E-01 | NS   | 3.06E-01 | NS   |
| A_64_P053124 | XM_002725502 | 690948 | LOC690948  | similar to paired-Ig-like receptor A11                                                                       | 4.21E-02 | -1.5 | 1.77E-01 | NS   | 3.82E-01 | NS   |
| A_64_P083913 | NM_053396    | 84420  | Adcy7      | adenylate cyclase 7                                                                                          | 4.78E-02 | -1.5 | 6.53E-01 | NS   | 5.98E-02 | NS   |
| A_64_P052101 | NM_001047877 | 303631 | Arsf       | arylsulfatase G                                                                                              | 4.59E-02 | -1.5 | 1.71E-01 | NS   | 1.84E-01 | NS   |
| A_64_P001580 | XR_009033    | 686785 | LOC686785  | similar to N-acetyltransferase, homolog of S. cerevisiae ARD1                                                | 2.84E-02 | -1.5 | 8.07E-01 | NS   | 1.02E-02 | 1.7  |
| A_64_P125130 | XM_001079317 | 691700 | LOC691700  | similar to heparan sulfate D-glucosaminyl 3-O-sulfotransferase 4                                             | 1.80E-02 | -1.5 | 5.82E-01 | NS   | 4.19E-01 | NS   |
| A_64_P086096 | NM_001013039 | 259167 | Art5       | ADP-ribosyltransferase 5                                                                                     | 8.92E-03 | -1.5 | 1.20E-01 | NS   | 3.86E-01 | NS   |
| A_64_P160338 | NM_001106149 | 291608 | RGD1563060 | similar to AVLV472                                                                                           | 2.61E-02 | -1.5 | 7.10E-02 | NS   | 1.28E-01 | NS   |
| A_64_P078423 | XM_001078533 | 500286 | RGD1562010 | similar to Fls485 protein                                                                                    | 2.84E-02 | -1.5 | 6.71E-01 | NS   | 2.06E-02 | -1.8 |
| A_64_P165137 | NM_001109438 | 681287 | Map7d1     | MAP7 domain containing 1 chaperonin containing Tcp1, subunit 4 (delta)                                       | 1.88E-02 | -1.5 | 8.41E-02 | NS   | 5.43E-02 | NS   |
| A_44_P262192 | NM_182814    | 29374  | Cct4       | thyroid hormone receptor interactor 10                                                                       | 2.02E-02 | -1.5 | 6.54E-01 | NS   | 3.94E-02 | 1.9  |
| A_44_P238257 | NM_053920    | 116717 | Trip10     | D site of albumin promoter (albumin D-box) binding protein                                                   | 6.60E-03 | -1.5 | 1.58E-03 | -1.3 | 1.28E-01 | NS   |
| A_64_P049828 | NM_012543    | 24309  | Dbp        | dual-specificity tyrosine-(Y)-phosphorylation regulated kinase 1b                                            | 2.38E-02 | -1.5 | 1.07E-01 | NS   | 4.23E-01 | NS   |
| A_64_P131903 | NM_001107496 | 308468 | Dyrk1b     | glucocorticoid modulatory element binding protein 2                                                          | 2.77E-02 | -1.5 | 4.27E-02 | -1.6 | 2.05E-01 | NS   |
| A_64_P058477 | NM_031803    | 83635  | Gmeb2      | protein 2                                                                                                    | 1.68E-02 | -1.5 | 9.81E-01 | NS   | 1.37E-01 | NS   |
| A_43_P12426  | NM_024369    | 79210  | Fstl1      | folliculin-like 1                                                                                            | 4.11E-02 | -1.5 | 2.32E-01 | NS   | 3.53E-01 | NS   |
| A_64_P118499 | XM_001068622 |        |            |                                                                                                              | 1.47E-02 | -1.5 | 6.21E-01 | NS   | 5.11E-01 | NS   |
| A_44_P267415 | NM_001108428 | 361312 | RGD1563159 | RGD1563159                                                                                                   | 2.10E-02 | -1.5 | 5.79E-02 | NS   | 6.15E-01 | NS   |
| A_64_P030829 | NM_001109501 | 688429 | Arhgap10   | Rho GTPase activating protein 10                                                                             | 1.84E-02 | -1.5 | 1.08E-01 | NS   | 4.01E-02 | 1.7  |
| A_42_P625531 | NM_001107985 | 313610 | Extl1      | exostosin (multiple)-like 1                                                                                  | 2.99E-02 | -1.5 | 2.66E-02 | -1.3 | 2.66E-01 | NS   |
| A_64_P065200 | NM_001044300 | 690899 | MGC112715  | platelet receptor G24                                                                                        | 1.04E-02 | -1.5 | 9.03E-02 | NS   | 2.50E-01 | NS   |
| A_64_P043010 | XM_219933    | 293985 | Cyp2c79    | cytochrome P450, family 2, subfamily c, polypeptide 79                                                       | 4.75E-02 | -1.5 | 9.30E-01 | NS   | 9.34E-01 | NS   |
| A_44_P482595 | NM_053796    | 116479 | F11r       | F11 receptor                                                                                                 | 4.73E-02 | -1.5 | 1.61E-01 | NS   | 7.98E-01 | NS   |
| A_44_P291071 | NM_001106834 | 300807 | Rora       | RAR-related orphan receptor A                                                                                | 1.31E-02 | -1.4 | 1.89E-01 | NS   | 7.66E-01 | NS   |
| A_64_P151146 | NM_001034130 | 296936 | Iqub       | IQ motif and ubiquitin domain containing                                                                     | 8.93E-03 | -1.4 | 9.15E-01 | NS   | 2.68E-02 | 1.8  |
| A_64_P132109 | FQ225308     |        |            |                                                                                                              | 2.16E-02 | -1.4 | 1.57E-01 | NS   | 1.39E-01 | NS   |
| A_44_P380070 | NM_001008851 | 414787 | RT1-M10-1  | RT1 class I, locus M10, gene 1 solute carrier family 4, sodium bicarbonate transporter, member 10            | 4.65E-02 | -1.4 | 2.88E-01 | NS   | 3.84E-01 | NS   |
| A_64_P174001 | NM_178092    | 295645 | Slc4a10    | chloride channel Kb                                                                                          | 1.39E-02 | -1.4 | 1.07E-01 | NS   | 1.56E-01 | NS   |
| A_64_P011544 | NM_173103    | 79430  | Clnkb      |                                                                                                              | 2.70E-02 | -1.4 | 7.13E-01 | NS   | 1.22E-01 | NS   |
| A_44_P958051 | FQ222842     |        |            |                                                                                                              | 3.03E-02 | -1.4 | 8.46E-01 | NS   | 1.26E-01 | NS   |
| A_44_P241541 | NM_001017458 | 314683 | Tcp11i2    | t-complex 11 (mouse) like 2                                                                                  | 3.64E-02 | -1.4 | 6.72E-01 | NS   | 7.75E-02 | NS   |
| A_44_P222475 | NM_001014248 | 365493 | RGD1308127 | similar to 2700078E11Rik protein                                                                             | 3.97E-02 | -1.4 | 9.41E-01 | NS   | 1.05E-01 | NS   |
| A_44_P764174 | NM_001014843 | 548326 | Faim3      | Fas apoptotic inhibitory molecule 3                                                                          | 1.55E-02 | -1.4 | 6.24E-01 | NS   | 4.63E-01 | NS   |
| A_64_P159952 | NM_019123    | 29758  | St6galnac3 | ST6 (alpha-N-acetylneuraminyl-2,3-beta-galactosyl-1,3)-N-acetylgalactosaminide alpha-2,6-sialyltransferase 3 | 1.12E-02 | -1.4 | 8.22E-02 | NS   | 1.80E-01 | NS   |
| A_44_P468879 | NM_001007798 | 367901 | Btk        | Bruton agammaglobulinemia tyrosine kinase                                                                    | 2.04E-02 | -1.4 | 7.71E-01 | NS   | 1.87E-01 | NS   |
| A_64_P130977 | NM_001012179 | 361927 | Fxr1       | fragile X mental retardation, autosomal homolog 1                                                            | 3.20E-02 | -1.4 | 1.48E-01 | NS   | 1.13E-01 | NS   |
| A_42_P815675 | NM_001108394 | 361104 | Zcchc24    | zinc finger, CCHC domain containing 24                                                                       | 4.07E-02 | -1.4 | 7.50E-03 | -1.5 | 7.89E-02 | NS   |

|               |              |        |            |                                                                                                 |          |      |          |      |          |      |
|---------------|--------------|--------|------------|-------------------------------------------------------------------------------------------------|----------|------|----------|------|----------|------|
| A_44_P1000653 | NM_031531    | 24795  | Serpina3n  | serine (or cysteine) peptidase inhibitor, clade A, member 3N                                    | 4.12E-02 | -1.4 | 1.98E-01 | NS   | 4.35E-01 | NS   |
| A_64_P065947  | NM_031138    | 81816  | Ube2b      | ubiquitin-conjugating enzyme E2B (RAD6 homolog, <i>S. cerevisiae</i> )                          | 9.19E-03 | -1.4 | 8.76E-02 | NS   | 2.00E-01 | NS   |
| A_64_P144401  | XM_001063390 | 305940 | Sacs       | spastic ataxia of Charlevoix-Saguenay (sacsin)                                                  | 2.53E-02 | -1.4 | 1.54E-01 | NS   | 8.56E-02 | NS   |
| A_44_P668313  | XR_085898    | 315732 | RGD1560011 | similar to Nuclear membrane binding protein NUCLING                                             | 3.80E-02 | -1.4 | 1.85E-01 | NS   | 6.44E-02 | NS   |
| A_44_P548065  | NM_031535    | 24888  | Bcl2l1     | Bcl2-like 1                                                                                     | 3.05E-02 | -1.4 | 2.94E-01 | NS   | 8.94E-02 | NS   |
| A_44_P177465  | AJ131902     | 85246  | Gas7       | growth arrest specific 7                                                                        | 4.46E-03 | -1.4 | 7.82E-01 | NS   | 8.36E-01 | NS   |
| A_64_P086259  | NM_001100671 | 298757 | Ati2       | atlastin GTPase 2                                                                               | 1.89E-02 | -1.4 | 3.69E-01 | NS   | 9.20E-03 | 1.9  |
| A_44_P188280  | NM_012492    | 24176  | Adrb2      | adrenergic, beta-2-, receptor, surface                                                          | 3.40E-02 | -1.4 | 3.41E-02 | -1.4 | 1.23E-01 | NS   |
| A_44_P355850  | NM_139115    | 245982 | Coro6      | coronin 6                                                                                       | 2.30E-02 | -1.4 | 7.14E-03 | -1.4 | 4.59E-02 | 1.9  |
| A_64_P019370  | XM_340932    |        |            |                                                                                                 | 4.79E-02 | -1.4 | 5.83E-03 | 1.5  | 1.84E-01 | NS   |
| A_44_P304825  | XR_008128    |        |            |                                                                                                 | 3.28E-02 | -1.4 | 9.47E-01 | NS   | 1.20E-01 | NS   |
| A_64_P203665  | BC166501     |        |            |                                                                                                 | 1.43E-02 | -1.4 | 5.88E-04 | -1.4 | 7.49E-01 | NS   |
| A_64_P149193  | NM_001107355 | 306991 | RGD1560511 | similar to Vps41 protein chromodomain protein, Y chromosome-like 2                              | 3.92E-02 | -1.4 | 1.91E-01 | NS   | 2.96E-01 | NS   |
| A_44_P196922  | NM_001106189 | 292044 | Cdyl2      | calcium/calmodulin-dependent protein kinase II delta                                            | 3.96E-02 | -1.4 | 7.99E-01 | NS   | 3.25E-01 | NS   |
| A_64_P158505  | NM_012519    | 24246  | Camk2d     | platelet-derived growth factor beta polypeptide (simian sarcoma viral (v-sis) oncogene homolog) | 3.29E-02 | -1.4 | 2.11E-01 | NS   | 3.84E-02 | -1.4 |
| A_64_P086538  | NM_031524    | 24628  | Pdgfb      | activation-induced cytidine deaminase                                                           | 4.85E-02 | -1.4 | 8.36E-01 | NS   | 3.53E-03 | 2.2  |
| A_64_P113483  | NM_001100779 | 399679 | aicda      | period homolog 1 ( <i>Drosophila</i> )                                                          | 3.81E-02 | -1.4 | 5.60E-01 | NS   | 1.57E-02 | -2.1 |
| A_64_P300243  | NM_001034125 | 287422 | Per1       | RT1 class II, locus Db1                                                                         | 4.10E-02 | -1.4 | 8.16E-01 | NS   | 2.39E-01 | NS   |
| A_64_P130578  | NM_001008884 | 294270 | RT1-Db1    | protein kinase C, beta                                                                          | 3.04E-02 | -1.4 | 4.54E-01 | NS   | 7.93E-01 | NS   |
| A_64_P019599  | NM_012713    | 25023  | Prkcb      | ral guanine nucleotide dissociation stimulator                                                  | 2.44E-02 | -1.4 | 8.23E-01 | NS   | 8.32E-01 | NS   |
| A_44_P339818  | NM_019250    | 29622  | Ralgds     | tolerance-associated gene 1                                                                     | 2.05E-02 | -1.4 | 5.17E-01 | NS   | 4.97E-01 | NS   |
| A_44_P335703  | NM_001110838 | 363169 | Toag1      | dual specificity phosphatase 8                                                                  | 2.90E-02 | -1.4 | 5.69E-03 | -1.2 | 2.46E-01 | NS   |
| A_64_P055428  | NM_001108510 | 361679 | Dusp8      | ubiquitin specific peptidase 32                                                                 | 3.91E-02 | -1.4 | 3.63E-02 | -1.6 | 5.30E-01 | NS   |
| A_44_P255934  | NM_001107032 | 303394 | Usp32      |                                                                                                 | 3.49E-02 | -1.4 | 2.68E-01 | NS   | 1.96E-01 | NS   |
| A_64_P349856  | BC169047     |        |            |                                                                                                 | 4.04E-02 | -1.4 | 7.57E-02 | NS   | 1.27E-01 | NS   |
| A_64_P066841  | NM_021865    | 60462  | Batf3      | basic leucine zipper transcription factor, ATF-like 3                                           | 4.47E-02 | -1.4 | 3.17E-01 | NS   | 5.04E-01 | NS   |
| A_44_P1004781 | XM_001056227 |        |            |                                                                                                 | 4.49E-02 | -1.4 | 5.61E-02 | NS   | 4.43E-01 | NS   |
| A_64_P157884  | NM_001108589 | 362197 | Mapkbp1    | mitogen activated protein kinase binding protein 1                                              | 4.45E-02 | -1.4 | 6.89E-01 | NS   | 9.09E-01 | NS   |
| A_44_P289173  | NM_001031813 | 361180 | Grtp1      | growth hormone regulated TBC protein 1                                                          | 3.83E-02 | -1.4 | 1.83E-01 | NS   | 2.80E-01 | NS   |
| A_44_P1010087 | NM_012581    | 24452  | Hoxa2      | homeo box A2                                                                                    | 2.87E-02 | -1.4 | 1.47E-02 | -1.3 | 6.43E-02 | NS   |
| A_64_P049827  | NM_012543    | 24309  | Dbp        | D site of albumin promoter (albumin D-box) binding protein                                      | 4.92E-02 | -1.4 | 2.32E-01 | NS   | 7.26E-01 | NS   |
| A_64_P152873  | XM_001077526 | 315163 | RGD1563996 | similar to Protein UNQ9166/PRO28631 precursor                                                   | 2.63E-02 | -1.4 | 7.38E-01 | NS   | 2.14E-01 | NS   |
| A_42_P673370  | NM_022922    | 24849  | Tpi1       | triosephosphate isomerase 1                                                                     | 3.85E-02 | -1.4 | 2.17E-02 | -1.6 | 1.37E-01 | NS   |
| A_64_P084786  | XM_001064981 | 310256 | RGD1561499 | similar to leucine rich repeat containing 31                                                    | 3.73E-02 | -1.4 | 6.59E-01 | NS   | 3.35E-02 | -2.5 |
| A_44_P192360  | NM_001039914 | 297968 | Akirin2    | akirin 2                                                                                        | 4.86E-02 | -1.4 | 9.98E-01 | NS   | 3.34E-02 | 1.7  |
| A_43_P13418   | NM_172042    | 170899 | Kcnk2      | potassium channel, subfamily K, member 2                                                        | 3.57E-02 | -1.4 | 1.87E-01 | NS   | 8.04E-02 | NS   |
| A_42_P625419  | XM_221535    | 304020 | RGD1565927 | similar to 4631422O05Rik protein                                                                | 2.70E-02 | -1.4 | 1.52E-02 | -1.4 | 2.00E-01 | NS   |
| A_64_P013226  | NM_001025420 | 361680 | Lsp1       | lymphocyte-specific protein 1                                                                   | 1.97E-02 | -1.4 | 2.67E-01 | NS   | 1.16E-01 | NS   |
| A_64_P013549  | NM_001127653 | 364418 | Nkx2-6     | NK2 transcription factor related, locus 6 ( <i>Drosophila</i> )                                 | 4.22E-02 | -1.4 | 1.95E-01 | NS   | 5.80E-01 | NS   |
| A_44_P971189  | EV768969     |        |            |                                                                                                 | 3.47E-02 | -1.4 | 9.83E-01 | NS   | 4.37E-02 | 1.9  |
| A_64_P048379  | NM_023025    | 65210  | Cyp2j4     | cytochrome P450, family 2, subfamily j, polypeptide 4                                           | 1.19E-02 | -1.4 | 5.41E-02 | NS   | 7.78E-01 | NS   |
| A_64_P066404  | NM_001108438 | 361364 | Dok4       | docking protein 4                                                                               | 2.71E-02 | -1.4 | 2.52E-01 | NS   | 9.13E-01 | NS   |
| A_44_P603986  | AI407942     |        |            |                                                                                                 | 4.84E-02 | -1.4 | 1.67E-01 | NS   | 2.17E-01 | NS   |

|               |              |        |            |                                                                                         |          |      |          |      |          |      |
|---------------|--------------|--------|------------|-----------------------------------------------------------------------------------------|----------|------|----------|------|----------|------|
| A_44_P503996  | NM_001135872 | 311987 | Rsbn1l     | round spermatid basic protein 1-like                                                    | 2.48E-02 | -1.4 | 1.67E-01 | NS   | 8.70E-02 | NS   |
| A_64_P082653  | BC085710     |        |            |                                                                                         | 3.25E-02 | -1.4 | 3.29E-01 | NS   | 4.64E-01 | NS   |
| A_44_P726568  | XM_001055793 | 362524 | Ptpn3      | protein tyrosine phosphatase, non-receptor type 3                                       | 3.38E-02 | -1.4 | 4.21E-01 | NS   | 5.52E-02 | NS   |
| A_42_P715070  | NM_001105725 | 29157  | Ccng2      | cyclin G2                                                                               | 3.67E-02 | -1.4 | 4.04E-01 | NS   | 1.33E-02 | 1.9  |
| A_42_P624905  | XM_001054594 | 317508 | Map7d2     | MAP7 domain containing 2                                                                | 5.35E-03 | -1.4 | 9.54E-01 | NS   | 9.32E-01 | NS   |
| A_42_P653257  | NM_145683    | 246781 | Ptpn7      | protein tyrosine phosphatase, non-receptor type 7                                       | 4.44E-02 | -1.4 | 5.52E-01 | NS   | 5.10E-01 | NS   |
| A_64_P093068  | AY310156     |        |            |                                                                                         | 4.08E-02 | -1.4 | 6.58E-01 | NS   | 6.26E-01 | NS   |
| A_64_P176343  | XM_219045    |        |            |                                                                                         | 2.80E-02 | -1.4 | 4.83E-01 | NS   | 6.28E-01 | NS   |
| A_44_P206550  | NM_001100494 | 287447 | Dullard    | Dullard homolog (Xenopus laevis)                                                        | 3.11E-02 | -1.4 | 2.35E-01 | NS   | 1.35E-01 | NS   |
| A_44_P945404  | NM_001109425 | 680717 | Znf703     | zinc finger protein 703                                                                 | 2.38E-02 | -1.4 | 4.87E-02 | -1.3 | 4.61E-02 | 1.4  |
| A_64_P035790  | NM_001000642 | 404835 | Olr646     | olfactory receptor 646                                                                  | 2.41E-02 | -1.4 | 6.00E-01 | NS   | 1.62E-01 | NS   |
| A_64_P022363  | XM_001062816 |        |            |                                                                                         | 1.86E-02 | -1.3 | 4.00E-01 | NS   | 9.35E-01 | NS   |
| A_64_P024486  | NM_001109301 | 501097 | RGD1560271 | similar to inhibitor of MyoD family-a                                                   | 4.44E-02 | -1.3 | 2.07E-01 | NS   | 6.07E-02 | NS   |
| A_44_P999395  | NM_001013950 | 300215 | Lmbr1l     | limb region 1-like homolog (mouse)                                                      | 3.06E-02 | -1.3 | 1.76E-01 | NS   | 8.30E-01 | NS   |
| A_44_P1011038 | NM_001044259 | 498959 | Fbxo31     | F-box protein 31                                                                        | 4.08E-02 | -1.3 | 9.98E-02 | NS   | 1.36E-01 | NS   |
| A_64_P071983  | NM_001012072 | 309513 | Ppp1r3c    | subunit 3C                                                                              | 2.61E-02 | -1.3 | 9.13E-02 | NS   | 1.10E-01 | NS   |
| A_64_P022320  | NM_172323    | 282821 | Has1       | hyaluronan synthase 1                                                                   | 3.70E-02 | -1.3 | 7.57E-02 | NS   | 9.16E-01 | NS   |
| A_44_P492543  | NM_001014096 | 315953 | Cldn18     | claudin 18                                                                              | 4.29E-02 | -1.3 | 7.53E-02 | NS   | 1.83E-01 | NS   |
| A_64_P016810  | NM_001108076 | 314654 | Myo1f      | myosin IF                                                                               | 4.59E-02 | -1.3 | 1.82E-01 | NS   | 4.28E-01 | NS   |
| A_44_P349844  | XM_221023    |        |            |                                                                                         | 3.60E-02 | -1.3 | 4.75E-01 | NS   | 2.98E-01 | NS   |
| A_64_P133967  | NM_033352    | 84356  | Abcd2      | ATP-binding cassette, sub-family D (ALD), member 2                                      | 4.97E-02 | -1.3 | 9.80E-02 | NS   | 1.26E-01 | NS   |
| A_44_P549494  | NM_013069    | 25599  | Cd74       | Cd74 molecule, major histocompatibility complex, class II invariant chain               | 2.80E-02 | -1.3 | 5.99E-01 | NS   | 8.94E-01 | NS   |
| A_44_P542390  | NM_019140    | 25529  | Ptprs      | protein tyrosine phosphatase, receptor type, S                                          | 3.48E-02 | -1.3 | 2.76E-01 | NS   | 1.28E-01 | NS   |
| A_42_P655620  | FQ213594     |        |            |                                                                                         | 1.45E-02 | -1.3 | 9.65E-01 | NS   | 1.28E-02 | 1.7  |
| A_64_P119407  | NM_023978    | 78962  | Per3       | period homolog 3 (Drosophila)                                                           | 1.99E-02 | -1.3 | 6.39E-01 | NS   | 2.39E-01 | NS   |
| A_44_P339862  | NM_001106852 | 300974 | Mrp13      | mitochondrial ribosomal protein L3                                                      | 4.28E-02 | -1.3 | 7.32E-01 | NS   | 9.02E-02 | NS   |
| A_64_P065483  | NM_001012106 | 313702 | Mad2l2     | MAD2 mitotic arrest deficient-like 2 (yeast)                                            | 4.84E-02 | -1.3 | 1.57E-01 | NS   | 5.01E-01 | NS   |
| A_64_P038822  | NM_001008846 | 365542 | RT1-DOb    | RT1 class II, locus DOb                                                                 | 4.06E-02 | -1.3 | 3.04E-01 | NS   | 2.14E-02 | -1.3 |
| A_44_P269085  | NM_024354    | 25590  | Chra4      | cholinergic receptor, nicotinic, alpha 4                                                | 3.41E-02 | -1.3 | 3.99E-01 | NS   | 7.81E-02 | NS   |
| A_42_P828547  | NM_133611    | 171147 | Slc2a13    | solute carrier family 2 (facilitated glucose transporter), member 13                    | 4.04E-02 | -1.3 | 4.63E-01 | NS   | 6.58E-01 | NS   |
| A_64_P030654  | NM_017128    | 29200  | Inhba      | inhibin beta-A                                                                          | 3.86E-02 | -1.3 | 4.49E-02 | -1.3 | 5.91E-01 | NS   |
| A_64_P132516  | NM_031831    | 83765  | Rtn4       | reticulon 4                                                                             | 4.86E-02 | -1.3 | 5.99E-02 | NS   | 2.45E-01 | NS   |
| A_64_P038847  | X62889       |        |            |                                                                                         | 4.91E-02 | -1.3 | 7.22E-01 | NS   | 4.77E-01 | NS   |
| A_44_P430345  | NM_001030041 | 363026 | Carm1      | coactivator-associated arginine methyltransferase 1                                     | 4.02E-02 | -1.3 | 9.09E-02 | NS   | 6.89E-02 | NS   |
| A_64_P001799  | NM_001109270 | 500563 | Grrp1      | glycine/arginine rich protein 1                                                         | 2.91E-02 | -1.3 | 3.27E-01 | NS   | 3.73E-01 | NS   |
| A_64_P082217  | XM_001061747 | 117253 | Dnah11     | dynein, axonemal, heavy chain 11                                                        | 3.74E-02 | -1.3 | 2.16E-01 | NS   | 3.51E-01 | NS   |
| A_44_P306810  | NM_001106331 | 293704 | Trpt1      | tRNA phosphotransferase 1                                                               | 3.00E-02 | -1.3 | 7.37E-02 | NS   | 6.25E-02 | NS   |
| A_64_P150187  | XM_343468    | 363133 | Pcbp4      | poly(rC) binding protein 4                                                              | 4.86E-02 | -1.3 | 8.86E-01 | NS   | 4.96E-01 | NS   |
| A_64_P085926  | NM_030860    | 81518  | Mef2d      | myocyte enhancer factor 2D                                                              | 2.87E-02 | -1.3 | 2.37E-02 | -1.3 | 4.78E-02 | 1.5  |
| A_64_P076725  | NM_001107587 | 309349 | Slitrk2    | SLIT and NTRK-like family, member 2                                                     | 4.07E-02 | -1.3 | 2.01E-01 | NS   | 1.01E-01 | NS   |
| A_44_P180229  | XM_002724808 | 288589 | RGD1565457 | similar to Rasa4 protein                                                                | 4.63E-02 | -1.3 | 1.05E-01 | NS   | 2.34E-01 | NS   |
| A_44_P149352  | NM_017327    | 50664  | Gnao1      | guanine nucleotide binding protein (G protein), alpha activating activity polypeptide O | 4.52E-02 | -1.2 | 8.77E-02 | NS   | 5.61E-01 | NS   |
| A_44_P1046697 | NM_001128079 | 363249 | Ctdsp1     | CTD (carboxy-terminal domain, RNA polymerase II, polypeptide A) small phosphatase 1     | 3.86E-02 | -1.2 | 6.75E-01 | NS   | 3.39E-01 | NS   |
| A_64_P094065  | NM_012773    | 498549 | Akap11     | A kinase (PRKA) anchor protein 11                                                       | 4.86E-02 | -1.2 | 6.05E-02 | NS   | 6.62E-02 | NS   |
| A_42_P624382  | NM_138899    | 192260 | Cdipt      | CDP-diacylglycerol--inositol 3-phosphatidyltransferase (phosphatidylinositol synthase)  | 4.32E-02 | 1.2  | 3.24E-01 | NS   | 2.50E-02 | -1.4 |

|              |              |           |              |                                                                                                                                |          |     |          |     |          |      |
|--------------|--------------|-----------|--------------|--------------------------------------------------------------------------------------------------------------------------------|----------|-----|----------|-----|----------|------|
| A_64_P135813 | NM_001004233 | 296988    | Mkm1         | makorin ring finger protein 1                                                                                                  | 4.85E-02 | 1.2 | 1.76E-01 | NS  | 2.83E-01 | NS   |
| A_64_P142086 | XR_008781    |           |              | protein-kinase, interferon-inducible double stranded RNA dependent inhibitor, repressor of (P58 repressor)                     | 4.93E-02 | 1.2 | 1.59E-01 | NS  | 3.04E-01 | NS   |
| A_44_P300965 | XM_218949    | 308845    | Prkrir       |                                                                                                                                | 3.96E-02 | 1.2 | 3.08E-01 | NS  | 1.59E-01 | NS   |
| A_64_P030904 | NM_001107023 | 303337    | Rab11fip4    | RAB11 family interacting protein 4 (class II)                                                                                  | 3.78E-02 | 1.2 | 6.24E-01 | NS  | 3.67E-01 | NS   |
| A_64_P138346 | XR_008831    |           |              |                                                                                                                                | 2.33E-02 | 1.2 | 2.44E-02 | 1.2 | 9.62E-02 | NS   |
| A_44_P391986 | NM_001034112 | 360631    | Mlx          | MAX-like protein X exportin, tRNA (nuclear export receptor for tRNAs)                                                          | 3.95E-02 | 1.3 | 3.64E-02 | 1.2 | 7.05E-01 | NS   |
| A_64_P262041 | NM_001108102 | 314879    | Xpot         | protein phosphatase 1, regulatory (inhibitor) subunit 12C                                                                      | 3.98E-02 | 1.3 | 4.51E-01 | NS  | 1.14E-02 | -1.5 |
| A_44_P339202 | XM_574359    | 499076    | Ppp1r12c     |                                                                                                                                | 4.74E-02 | 1.3 | 2.52E-01 | NS  | 5.27E-01 | NS   |
| A_64_P111594 | XM_001078937 |           |              |                                                                                                                                | 2.73E-02 | 1.3 | 1.18E-01 | NS  | 1.86E-01 | NS   |
| A_64_P062123 | NM_001108521 | 361739    | Tmc1         | transmembrane channel-like 1                                                                                                   | 4.15E-02 | 1.3 | 7.22E-01 | NS  | 8.55E-01 | NS   |
| A_44_P652332 | NM_001025023 | 362557    | Tmem48       | transmembrane protein 48                                                                                                       | 3.60E-02 | 1.3 | 1.23E-01 | NS  | 9.09E-01 | NS   |
| A_64_P085004 | NM_023992    | 78976     | Kiss1r       | KISS1 receptor                                                                                                                 | 3.10E-02 | 1.3 | 4.61E-01 | NS  | 3.10E-01 | NS   |
| A_64_P061855 | NM_001130494 | 300057    | Recq4        | RecQ protein-like 4                                                                                                            | 3.15E-02 | 1.3 | 5.81E-01 | NS  | 6.65E-01 | NS   |
| A_44_P513193 | NM_012793    | 25257     | Gamt         | guanidinoacetate N-methyltransferase                                                                                           | 2.10E-02 | 1.3 | 6.16E-01 | NS  | 3.03E-01 | NS   |
| A_44_P166206 | NM_001024260 | 311111    | Nostrin      | nitric oxide synthase trafficker                                                                                               | 2.73E-02 | 1.3 | 8.76E-01 | NS  | 6.53E-01 | NS   |
| A_42_P789283 | NM_053463    | 84595     | Nucb1        | nucleobindin 1                                                                                                                 | 4.54E-02 | 1.3 | 1.17E-01 | NS  | 6.21E-01 | NS   |
| A_43_P22519  | NM_001105820 | 287557    | Spaca3       | sperm acrosome associated 3 similar to pyridoxal (pyridoxine, vitamin B6) kinase                                               | 3.43E-02 | 1.3 | 8.14E-02 | NS  | 5.42E-01 | NS   |
| A_64_P273084 | XM_342112    | 361819    | RGD1566085   |                                                                                                                                | 3.11E-02 | 1.3 | 2.33E-02 | 1.4 | 7.55E-02 | NS   |
| A_42_P568916 | NM_001013881 | 290669    | Gatad2a      | GATA zinc finger domain containing 2A                                                                                          | 2.19E-02 | 1.3 | 2.74E-01 | NS  | 8.70E-01 | NS   |
| A_64_P056689 | XM_001071473 |           |              | TRAF domain and POZ/BTB containing protein T1-like                                                                             | 4.89E-02 | 1.3 | 1.20E-01 | NS  | 8.32E-01 | NS   |
| A_64_P002602 | XM_002725996 | 100365687 | LOC100365687 |                                                                                                                                | 1.98E-02 | 1.3 | 1.09E-01 | NS  | 3.15E-01 | NS   |
| A_64_P074240 | XM_002725745 |           |              |                                                                                                                                | 4.71E-02 | 1.3 | 9.97E-02 | NS  | 3.25E-01 | NS   |
| A_64_P003937 | NM_173111    | 117557    | Tpm3         | tropomyosin 3, gamma similar to Hypothetical UPF0184 protein                                                                   | 3.52E-02 | 1.3 | 8.96E-03 | 1.2 | 3.92E-01 | NS   |
| A_42_P472520 | XM_575113    | 499780    | RGD1561113   | C9orf16 homolog                                                                                                                | 2.27E-02 | 1.3 | 1.16E-01 | NS  | 2.44E-01 | NS   |
| A_64_P047371 | NM_001109423 | 680615    | Hist1h2ak    | histone cluster 1, H2ak                                                                                                        | 3.28E-02 | 1.3 | 1.43E-01 | NS  | 8.97E-01 | NS   |
| A_64_P165964 | NM_017122    | 29177     | Hpca         | hippocalcin                                                                                                                    | 2.59E-02 | 1.3 | 5.75E-01 | NS  | 2.67E-01 | NS   |
| A_44_P210892 | NM_001009409 | 311530    | Nanp         | N-acetylneuraminic acid phosphatase                                                                                            | 3.01E-02 | 1.3 | 1.34E-01 | NS  | 1.87E-01 | NS   |
| A_44_P996006 | NM_001106590 | 296969    | Slc35b4      | solute carrier family 35, member B4                                                                                            | 4.67E-02 | 1.3 | 5.79E-02 | NS  | 2.29E-02 | 1.5  |
| A_64_P101026 | NM_001107847 | 312077    | Golga3       | golgi autoantigen, golgin subfamily a, 3                                                                                       | 4.74E-02 | 1.3 | 2.11E-02 | 1.2 | 4.69E-01 | NS   |
| A_64_P074539 | NM_053748    | 114591    | Dpp3         | dipeptidylpeptidase 3                                                                                                          | 4.92E-02 | 1.3 | 3.92E-01 | NS  | 3.36E-01 | NS   |
| A_64_P121558 | NM_001107233 | 305476    | RGD1308775   | similar to RIKEN cDNA 4921536K21                                                                                               | 2.39E-02 | 1.3 | 8.85E-01 | NS  | 8.46E-01 | NS   |
| A_64_P073098 | NM_031838    | 83789     | Rps2         | ribosomal protein S2 similar to Nucleolar GTP-binding protein 1 (Chronic renal failure gene protein) (GTP-binding protein NGB) | 4.63E-02 | 1.3 | 9.75E-01 | NS  | 3.35E-01 | NS   |
| A_64_P022559 | XR_006738    | 689842    | LOC689842    |                                                                                                                                | 2.04E-02 | 1.3 | 7.95E-01 | NS  | 2.20E-02 | -1.4 |
| A_43_P14881  | NM_031121    | 81785     | Ssrp1        | structure specific recognition protein 1                                                                                       | 4.03E-02 | 1.3 | 3.57E-01 | NS  | 5.35E-01 | NS   |
| A_43_P22140  | XR_085571    | 360595    | Rnft1        | ring finger protein, transmembrane 1                                                                                           | 3.83E-02 | 1.3 | 9.35E-01 | NS  | 1.89E-01 | NS   |
| A_64_P095403 | XM_002728651 |           |              |                                                                                                                                | 4.07E-02 | 1.3 | 7.22E-02 | NS  | 1.95E-02 | -1.4 |
| A_64_P116993 | NM_001009636 | 290995    | Prelid1      | PRELI domain containing 1                                                                                                      | 4.18E-02 | 1.3 | 2.67E-01 | NS  | 1.24E-01 | NS   |
| A_44_P326717 | XM_002724975 | 360932    | Atp10d       | ATPase, class V, type 10D                                                                                                      | 1.94E-02 | 1.3 | 7.01E-01 | NS  | 9.39E-01 | NS   |
| A_64_P098898 | NM_001108947 | 365841    | Slc25a44     | solute carrier family 25, member 44                                                                                            | 3.85E-02 | 1.3 | 2.62E-01 | NS  | 8.56E-01 | NS   |
| A_44_P438269 | NM_022585    | 58961     | Azin1        | antizyme inhibitor 1                                                                                                           | 2.66E-02 | 1.3 | 8.20E-01 | NS  | 8.08E-01 | NS   |
| A_42_P655897 | NM_001107890 | 312728    | Tspan9       | tetraspanin 9 glyoxylate reductase/hydroxypyruvate reductase                                                                   | 2.42E-02 | 1.3 | 5.01E-01 | NS  | 2.12E-01 | NS   |
| A_64_P157313 | NM_001113754 | 680021    | Grhpr        |                                                                                                                                | 4.23E-02 | 1.3 | 3.32E-01 | NS  | 7.91E-01 | NS   |
| A_44_P466321 | NM_001113776 | 289635    | Rel1         | RELT-like 1                                                                                                                    | 4.80E-02 | 1.3 | 2.51E-01 | NS  | 1.20E-02 | -2.0 |
| A_64_P151408 | NM_019226    | 29489     | Dync1h1      | dynein cytoplasmic 1 heavy chain 1                                                                                             | 3.60E-02 | 1.3 | 5.46E-01 | NS  | 9.83E-01 | NS   |
| A_64_P069581 | XM_001057119 | 680426    | LOC680426    | similar to CG7220-PA, isoform A                                                                                                | 4.94E-02 | 1.3 | 5.90E-01 | NS  | 2.00E-03 | -1.8 |
| A_64_P038142 | NM_001105826 | 287592    | Tubd1        | tubulin, delta 1                                                                                                               | 1.77E-02 | 1.3 | 4.18E-01 | NS  | 5.01E-01 | NS   |
| A_42_P800793 | NM_001108117 | 315345    | Copz1        | coatamer protein complex, subunit zeta 1                                                                                       | 3.27E-02 | 1.3 | 1.07E-01 | NS  | 1.09E-01 | NS   |
| A_44_P104952 | NM_053423    | 301965    | Tert         | telomerase reverse transcriptase                                                                                               | 4.18E-02 | 1.3 | 8.72E-01 | NS  | 4.27E-01 | NS   |
| A_64_P122676 | NM_001109553 | 689897    | Crygs        | crystallin, gamma S                                                                                                            | 2.72E-02 | 1.3 | 6.39E-01 | NS  | 6.50E-01 | NS   |

|               |              |           |            |                                                                                                                                  |          |     |          |     |          |      |
|---------------|--------------|-----------|------------|----------------------------------------------------------------------------------------------------------------------------------|----------|-----|----------|-----|----------|------|
| A_64_P015793  | XM_001061409 |           |            |                                                                                                                                  | 3.41E-02 | 1.3 | 4.26E-01 | NS  | 1.56E-01 | NS   |
| A_43_P20515   | XM_001055634 | 361917    | Zfand1     | zinc finger, AN1-type domain 1                                                                                                   | 2.25E-02 | 1.3 | 3.25E-01 | NS  | 1.08E-02 | -1.4 |
| A_44_P1058502 | NM_001106320 | 293645    | Ppfia1     | protein tyrosine phosphatase, receptor type, f polypeptide (PTPRF), interacting protein (liprin), alpha 1                        | 3.06E-02 | 1.3 | 6.45E-01 | NS  | 1.11E-02 | -1.6 |
| A_64_P122939  | NM_001108832 | 363661    | Mrm1       | mitochondrial rRNA methyltransferase 1 homolog (S. cerevisiae)                                                                   | 2.01E-02 | 1.3 | 9.72E-01 | NS  | 8.01E-03 | -1.5 |
| A_42_P688266  | XR_085668    | 361314    | Centd3     | centaurin, delta 3                                                                                                               | 4.80E-02 | 1.3 | 7.90E-02 | NS  | 9.35E-02 | NS   |
| A_64_P146444  | XR_006164    |           |            |                                                                                                                                  | 3.67E-02 | 1.3 | 2.64E-01 | NS  | 2.48E-01 | NS   |
| A_64_P062960  | NM_001106907 | 301373    | Tgfbra1    | transforming growth factor, beta receptor associated protein 1                                                                   | 2.58E-02 | 1.3 | 6.95E-01 | NS  | 2.60E-02 | -1.4 |
| A_42_P528007  | NM_053871    | 116650    | Srp54a     | signal recognition particle 54a                                                                                                  | 2.95E-02 | 1.3 | 1.53E-01 | NS  | 4.06E-01 | NS   |
| A_44_P482605  | NM_053341    | 83823     | Gipc1      | GIPC PDZ domain containing family, member 1                                                                                      | 4.19E-02 | 1.3 | 2.56E-01 | NS  | 7.60E-01 | NS   |
| A_44_P300137  | XM_001076355 | 299616    | Atp8b3     | ATPase, Class I, type 8B, member 3                                                                                               | 1.42E-02 | 1.3 | 2.26E-01 | NS  | 7.76E-01 | NS   |
| A_64_P006964  | XM_001079768 | 691824    | LOC691824  | hypothetical protein LOC691824                                                                                                   | 2.00E-02 | 1.3 | 4.91E-01 | NS  | 8.91E-04 | -1.6 |
| A_44_P349408  | NM_001024797 | 499653    | Gon4l      | gon-4-like (C. elegans)                                                                                                          | 2.57E-02 | 1.3 | 4.67E-01 | NS  | 9.45E-01 | NS   |
| A_64_P140736  | XM_001061943 |           |            |                                                                                                                                  | 3.07E-02 | 1.3 | 9.72E-02 | NS  | 3.11E-02 | -2.2 |
| A_64_P053943  | NM_001012192 | 362721    | Tssc1      | tumor suppressing subtransferable candidate 1                                                                                    | 1.53E-02 | 1.3 | 4.00E-03 | 1.3 | 1.77E-01 | NS   |
| A_44_P358883  | NM_001171096 | 100328908 | RGD1565819 | similar to C20orf174                                                                                                             | 2.18E-02 | 1.3 | 6.27E-01 | NS  | 5.52E-01 | NS   |
| A_44_P365443  | NM_134408    | 171447    | Lphn2      | latrophilin 2                                                                                                                    | 4.67E-02 | 1.3 | 4.14E-01 | NS  | 8.69E-01 | NS   |
| A_44_P163018  | NM_001009619 | 287042    | Nubp1      | nucleotide binding protein 1                                                                                                     | 3.28E-02 | 1.3 | 3.59E-02 | 1.2 | 2.21E-01 | NS   |
| A_42_P574960  | XR_009642    |           |            |                                                                                                                                  | 4.74E-02 | 1.3 | 3.98E-02 | 1.1 | 2.51E-01 | NS   |
| A_44_P527154  | NM_001024282 | 498753    | RGD1564767 | Histone H2a                                                                                                                      | 2.45E-02 | 1.3 | 9.28E-02 | NS  | 9.55E-01 | NS   |
| A_44_P158709  | NM_212497    | 361799    | Dom3z      | DOM-3 homolog Z (C. elegans)                                                                                                     | 4.82E-02 | 1.3 | 7.94E-01 | NS  | 4.73E-01 | NS   |
| A_64_P056897  | XM_001078590 | 502208    | Slc38a8    | solute carrier family 38, member 8                                                                                               | 2.81E-02 | 1.3 | 5.28E-01 | NS  | 6.68E-01 | NS   |
| A_64_P057106  | NM_001004087 | 360942    | Pcdh7      | protocadherin 7                                                                                                                  | 3.81E-02 | 1.3 | 5.28E-01 | NS  | 1.20E-02 | -1.5 |
| A_64_P030342  | XM_001056658 | 680322    | LOC680322  | similar to Histone H2a type 1                                                                                                    | 2.12E-02 | 1.3 | 8.66E-02 | NS  | 7.12E-01 | NS   |
| A_64_P030866  | NM_001024282 | 498753    | RGD1564767 | Histone H2a                                                                                                                      | 2.17E-02 | 1.3 | 1.28E-01 | NS  | 8.99E-01 | NS   |
| A_64_P016518  | NM_001005877 | 292794    | Ffar2      | free fatty acid receptor 2                                                                                                       | 4.81E-02 | 1.3 | 9.33E-01 | NS  | 1.53E-01 | NS   |
| A_44_P989558  | NM_001024347 | 500540    | Sifn1      | schlafen-like 1                                                                                                                  | 1.80E-02 | 1.3 | 4.17E-01 | NS  | 7.51E-01 | NS   |
| A_64_P129162  | NM_001131032 | 681901    | Utf1       | undifferentiated embryonic cell transcription factor 1                                                                           | 2.53E-02 | 1.3 | 2.31E-01 | NS  | 1.55E-01 | NS   |
| A_64_P138008  | NM_138505    | 24174     | Adra2b     | adrenergic, alpha-2B-, receptor                                                                                                  | 4.81E-02 | 1.3 | 2.06E-01 | NS  | 8.69E-01 | NS   |
| A_64_P134789  | XM_001080215 | 293509    | RGD1306928 | similar to hypothetical protein MGC13138                                                                                         | 4.09E-02 | 1.3 | 3.21E-02 | 1.2 | 2.08E-01 | NS   |
| A_64_P102410  | NM_001014188 | 362394    | Isy1       | ISY1 splicing factor homolog (S. cerevisiae)                                                                                     | 4.89E-02 | 1.3 | 6.53E-01 | NS  | 1.40E-01 | NS   |
| A_64_P149011  | NM_031352    | 83527     | Dbnl       | drebrin-like                                                                                                                     | 4.46E-02 | 1.3 | 1.09E-01 | NS  | 7.16E-01 | NS   |
| A_64_P031975  | NM_001108264 | 360475    | Alg1       | asparagine-linked glycosylation 1, beta-1,4-mannosyltransferase homolog (S. cerevisiae)                                          | 1.87E-02 | 1.3 | 1.14E-02 | 1.2 | 8.63E-01 | NS   |
| A_64_P019768  | XM_001068669 | 688874    | LOC688874  | similar to NEDD4-binding protein 1 (N4BP1)                                                                                       | 4.56E-02 | 1.3 | 6.58E-01 | NS  | 4.48E-02 | -1.5 |
| A_44_P161823  | NM_001013956 | 301306    | RGD1309049 | similar to RIKEN cDNA 4933415F23                                                                                                 | 3.90E-02 | 1.3 | 1.32E-01 | NS  | 8.52E-01 | NS   |
| A_64_P145701  | NM_001107875 | 312562    | Zfyve20    | zinc finger, FYVE domain containing 20                                                                                           | 3.94E-02 | 1.3 | 7.07E-02 | NS  | 7.20E-01 | NS   |
| A_44_P501843  | NM_001008322 | 299857    | Shmt2      | serine hydroxymethyltransferase 2 (mitochondrial)                                                                                | 3.13E-02 | 1.3 | 1.61E-02 | 1.2 | 6.71E-01 | NS   |
| A_64_P111953  | XM_001078666 | 309649    | Rab44      | RAB44, member RAS oncogene family                                                                                                | 4.15E-02 | 1.3 | 8.90E-01 | NS  | 4.57E-01 | NS   |
| A_64_P069872  | XR_009409    | 303275    | RGD1305508 | similar to hypothetical protein MGC23280 sema domain, immunoglobulin domain (Ig), short basic domain, secreted, (semaphorin) 3 F | 2.74E-02 | 1.3 | 2.81E-02 | 1.2 | 3.34E-01 | NS   |
| A_64_P131697  | NM_001108185 | 315996    | Sema3f     |                                                                                                                                  | 3.65E-02 | 1.3 | 8.78E-01 | NS  | 9.09E-01 | NS   |
| A_64_P112200  | FQ228322     |           |            |                                                                                                                                  | 4.39E-02 | 1.3 | 3.40E-01 | NS  | 5.41E-04 | -1.9 |
| A_64_P002506  | XM_001073085 |           |            |                                                                                                                                  | 2.53E-02 | 1.3 | 3.53E-02 | 1.1 | 8.04E-02 | NS   |
| A_64_P147993  | XM_001061850 | 499675    | Hist2h2ac  | histone cluster 2, H2ac                                                                                                          | 2.73E-02 | 1.3 | 7.95E-02 | NS  | 9.59E-01 | NS   |
| A_64_P143966  | NM_001108714 | 362756    | Pigh       | phosphatidylinositol glycan anchor biosynthesis, class H                                                                         | 4.27E-02 | 1.3 | 1.41E-01 | NS  | 1.69E-01 | NS   |
| A_64_P111816  | XR_005720    |           |            |                                                                                                                                  | 2.56E-02 | 1.3 | 2.16E-02 | 1.3 | 3.38E-01 | NS   |



|               |              |        |            |                                                                                                                                                            |          |     |          |     |          |      |
|---------------|--------------|--------|------------|------------------------------------------------------------------------------------------------------------------------------------------------------------|----------|-----|----------|-----|----------|------|
| A_44_P434462  | NM_013003    | 25511  | Pemt       | phosphatidylethanolamine N-methyltransferase                                                                                                               | 4.95E-02 | 1.3 | 6.04E-03 | 1.3 | 1.62E-01 | NS   |
| A_64_P071995  | AF148210     |        |            |                                                                                                                                                            | 3.42E-02 | 1.3 | 2.31E-01 | NS  | 1.29E-01 | NS   |
| A_64_P084333  | NM_001109508 | 688721 | Lrln4      | leucine rich repeat and fibronectin type III domain containing 4                                                                                           | 4.87E-02 | 1.3 | 1.85E-01 | NS  | 8.37E-01 | NS   |
| A_64_P027545  | NM_023095    | 65271  | Mgat5      | mannosyl (alpha-1,6-)-glycoprotein beta-1,6-N-acetyl-glucosaminyltransferase                                                                               | 1.07E-02 | 1.3 | 8.28E-01 | NS  | 1.57E-02 | -1.6 |
| A_64_P006340  | AY325170     |        |            |                                                                                                                                                            | 4.38E-02 | 1.3 | 6.31E-02 | NS  | 1.92E-02 | -1.5 |
| A_43_P16642   | NM_001009419 | 312826 | Cmas       | cytidine monophosphate N-acetylneuraminic acid synthetase similar to retinoblastoma-binding protein 1 isoform I                                            | 3.15E-02 | 1.3 | 2.67E-01 | NS  | 5.02E-01 | NS   |
| A_44_P264965  | XM_226650    | 294622 | RGD1564961 | similar to gem (nuclear organelle) associated protein 5                                                                                                    | 3.65E-02 | 1.3 | 2.36E-01 | NS  | 6.92E-01 | NS   |
| A_44_P272404  | NM_001172089 | 691231 | LOC691231  | Der1-like domain family, member 2                                                                                                                          | 3.47E-02 | 1.4 | 6.87E-01 | NS  | 7.47E-01 | NS   |
| A_64_P129033  | XM_001079920 | 691956 | Der12      |                                                                                                                                                            | 2.46E-02 | 1.4 | 8.16E-01 | NS  | 4.44E-02 | -1.5 |
| A_64_P082461  | FQ211879     |        |            |                                                                                                                                                            | 4.68E-02 | 1.4 | 5.71E-01 | NS  | 3.03E-02 | -1.3 |
| A_44_P1038885 | NM_001005530 | 287451 | Slc16a13   | solute carrier family 16, member 13 (monocarboxylic acid transporter 13) STT3, subunit of the oligosaccharyltransferase complex, homolog B (S. cerevisiae) | 4.64E-02 | 1.4 | 8.80E-03 | 1.2 | 8.99E-01 | NS   |
| A_44_P240819  | NM_001170539 | 363160 | Stt3b      |                                                                                                                                                            | 2.77E-02 | 1.4 | 3.43E-01 | NS  | 4.18E-01 | NS   |
| A_44_P271405  | NM_172223    | 282634 | Pxmp4      | peroxisomal membrane protein 4                                                                                                                             | 3.26E-02 | 1.4 | 8.53E-01 | NS  | 3.16E-01 | NS   |
| A_64_P024297  | NM_181091    | 113940 | Gmfg       | glia maturation factor, gamma                                                                                                                              | 4.59E-02 | 1.4 | 1.59E-01 | NS  | 8.77E-01 | NS   |
| A_43_P11181   | NM_001126098 | 691193 | Elof1      | elongation factor 1 homolog (S. cerevisiae)                                                                                                                | 3.57E-02 | 1.4 | 7.99E-02 | NS  | 4.13E-02 | -1.4 |
| A_64_P112610  | NM_001024872 | 298342 | Nkap       | NFKB activating protein                                                                                                                                    | 3.42E-02 | 1.4 | 7.93E-01 | NS  | 6.42E-01 | NS   |
| A_64_P125559  | NM_001105947 | 288925 | RGD1564058 | similar to cDNA sequence BC056474 acidic (leucine-rich) nuclear phosphoprotein 32 family, member B                                                         | 3.18E-02 | 1.4 | 2.91E-01 | NS  | 5.13E-02 | NS   |
| A_64_P022235  | NM_131911    | 170724 | Anp32b     |                                                                                                                                                            | 1.62E-02 | 1.4 | 3.08E-01 | NS  | 2.55E-01 | NS   |
| A_64_P043468  | XM_001068901 |        |            |                                                                                                                                                            | 4.63E-02 | 1.4 | 4.78E-01 | NS  | 1.28E-02 | -1.3 |
| A_44_P333078  | XM_001078833 | 311827 | Adamts2    | ADAMTS-like 2                                                                                                                                              | 1.78E-02 | 1.4 | 4.91E-01 | NS  | 2.77E-01 | NS   |
| A_64_P002551  | FQ219888     |        |            |                                                                                                                                                            | 4.27E-02 | 1.4 | 1.48E-02 | 1.2 | 7.78E-01 | NS   |
| A_64_P080165  | NM_001109147 | 499171 | Klf13      | Kruppel-like factor 13                                                                                                                                     | 2.59E-02 | 1.4 | 4.39E-02 | 1.2 | 1.31E-01 | NS   |
| A_44_P276811  | NM_001106539 | 296358 | Matn4      | matrilin 4                                                                                                                                                 | 3.95E-02 | 1.4 | 1.17E-03 | 1.4 | 1.65E-01 | NS   |
| A_44_P137802  | NM_001006997 | 308909 | Smpd1      | sphingomyelin phosphodiesterase 1, acid lysosomal                                                                                                          | 4.04E-02 | 1.4 | 3.69E-01 | NS  | 1.07E-01 | NS   |
| A_64_P050631  | NM_001107293 | 306261 | Eaf1       | ELL associated factor 1                                                                                                                                    | 2.41E-02 | 1.4 | 5.37E-01 | NS  | 6.24E-01 | NS   |
| A_64_P147769  | NM_012770    | 25206  | Gucy1b2    | guanylate cyclase 1, soluble, beta 2 potassium channel tetramerisation domain containing 14                                                                | 2.77E-02 | 1.4 | 6.44E-02 | NS  | 3.58E-01 | NS   |
| A_44_P332896  | XM_001064247 | 308836 | Kctd14     |                                                                                                                                                            | 2.50E-02 | 1.4 | 6.35E-04 | 1.5 | 3.19E-01 | NS   |
| A_64_P006739  | AY318959     |        |            |                                                                                                                                                            | 2.54E-02 | 1.4 | 4.47E-01 | NS  | 1.18E-01 | NS   |
| A_64_P228661  | NM_001011945 | 294336 | Pcbp3      | poly(rC) binding protein 3                                                                                                                                 | 3.77E-02 | 1.4 | 2.97E-01 | NS  | 2.15E-01 | NS   |
| A_64_P085201  | XM_001071952 | 689775 | LOC689775  | hypothetical protein LOC689775                                                                                                                             | 3.86E-02 | 1.4 | 6.92E-01 | NS  | 1.78E-01 | NS   |
| A_64_P069671  | XM_001073395 |        |            |                                                                                                                                                            | 1.27E-02 | 1.4 | 6.43E-02 | NS  | 6.44E-01 | NS   |
| A_44_P1020780 | NM_001034104 | 308310 | Tmc4       | transmembrane channel-like 4 phosphatidylinositol glycan anchor biosynthesis, class Z                                                                      | 4.57E-02 | 1.4 | 1.19E-01 | NS  | 1.24E-01 | NS   |
| A_44_P1019826 | NM_001109525 | 689116 | Pigz       |                                                                                                                                                            | 4.25E-02 | 1.4 | 2.08E-01 | NS  | 4.36E-01 | NS   |
| A_42_P664520  | NM_053430    | 84490  | Fen1       | flap structure-specific endonuclease 1                                                                                                                     | 4.81E-02 | 1.4 | 2.71E-01 | NS  | 2.86E-01 | NS   |
| A_44_P300506  | NM_022399    | 64202  | Calr       | calreticulin                                                                                                                                               | 2.59E-02 | 1.4 | 6.44E-02 | NS  | 4.47E-02 | -1.8 |
| A_44_P370537  | NM_001107784 | 311487 | Polr3f     | polymerase (RNA) III (DNA directed) polypeptide F                                                                                                          | 1.38E-02 | 1.4 | 7.92E-01 | NS  | 3.48E-01 | NS   |
| A_44_P685392  | NM_001031825 | 502858 | Gp9        | glycoprotein IX (platelet)                                                                                                                                 | 4.40E-02 | 1.4 | 9.94E-01 | NS  | 3.34E-01 | NS   |
| A_44_P375185  | NM_001107275 | 306009 | Slc39a14   | solute carrier family 39 (zinc transporter), member 14                                                                                                     | 3.65E-02 | 1.4 | 9.18E-01 | NS  | 4.85E-02 | -1.4 |
| A_64_P118907  | NM_001106699 | 298690 | B3galt6    | UDP-Gal:betaGal beta 1,3-galactosyltransferase, polypeptide 6                                                                                              | 4.21E-02 | 1.4 | 1.40E-01 | NS  | 6.19E-01 | NS   |
| A_44_P980732  | NM_001109604 | 690610 | Tmem86b    | transmembrane protein 86B                                                                                                                                  | 1.32E-02 | 1.4 | 4.62E-01 | NS  | 2.97E-01 | NS   |
| A_42_P814056  | NM_001108866 | 364380 | Abhd4      | abhydrolase domain containing 4                                                                                                                            | 2.82E-02 | 1.4 | 8.77E-02 | NS  | 5.14E-02 | NS   |
| A_64_P105107  | XM_001066614 | 306505 | Lonrf1     | LON peptidase N-terminal domain and ring finger 1                                                                                                          | 9.58E-03 | 1.4 | 3.30E-01 | NS  | 7.86E-01 | NS   |

|               |              |        |            |                                                                                                                 |          |     |          |     |          |      |
|---------------|--------------|--------|------------|-----------------------------------------------------------------------------------------------------------------|----------|-----|----------|-----|----------|------|
| A_44_P548857  | NM_001047102 | 360687 | Cadm2      | cell adhesion molecule 2                                                                                        | 3.20E-02 | 1.4 | 1.99E-02 | 1.5 | 9.13E-02 | NS   |
| A_64_P139285  | NM_001135716 | 310544 | Map9       | microtubule-associated protein 9                                                                                | 1.11E-02 | 1.4 | 1.50E-01 | NS  | 5.32E-02 | NS   |
| A_64_P030867  | NM_001024282 | 498753 | RGD1564767 | Histone H2a                                                                                                     | 4.47E-02 | 1.4 | 9.00E-02 | NS  | 9.19E-01 | NS   |
| A_64_P018639  | XM_001063288 | 682827 | LOC682827  | similar to F41G3.12                                                                                             | 2.73E-02 | 1.4 | 6.24E-01 | NS  | 8.16E-01 | NS   |
| A_64_P064888  | NM_001127303 | 499253 | Itpr12     | inositol 1,4,5-triphosphate receptor interacting protein-like 2                                                 | 3.12E-02 | 1.4 | 3.17E-01 | NS  | 1.14E-01 | NS   |
| A_44_P1018622 | NM_001007611 | 287534 | Fam101b    | family with sequence similarity 101, member B                                                                   | 4.39E-02 | 1.4 | 8.05E-01 | NS  | 3.15E-01 | NS   |
| A_64_P009560  | NM_001106981 | 302962 | Zscan10    | zinc finger and SCAN domain containing 10                                                                       | 2.28E-02 | 1.4 | 7.05E-01 | NS  | 1.13E-02 | -1.5 |
| A_44_P114638  | NM_001014057 | 312649 | Tsen2      | tRNA splicing endonuclease 2 homolog (S. cerevisiae)                                                            | 2.05E-02 | 1.4 | 7.44E-02 | NS  | 6.89E-01 | NS   |
| A_44_P225129  | XR_006869    |        |            |                                                                                                                 | 4.47E-02 | 1.4 | 8.43E-01 | NS  | 4.20E-01 | NS   |
| A_44_P254973  | NM_198051    | 378794 | Trmt11     | tRNA methyltransferase 11 homolog (S. cerevisiae)                                                               | 1.81E-02 | 1.4 | 6.85E-02 | NS  | 1.79E-02 | -1.6 |
| A_44_P445359  | NM_001034147 | 308718 | Pex7       | peroxisomal biogenesis factor 7                                                                                 | 4.87E-02 | 1.4 | 8.45E-02 | NS  | 6.82E-01 | NS   |
| A_64_P031456  | NM_022615    | 64550  | Top1       | topoisomerase (DNA) I                                                                                           | 2.89E-02 | 1.4 | 4.63E-01 | NS  | 8.32E-02 | NS   |
| A_43_P12065   | NM_020093    | 56816  | Park2      | Parkinson disease (autosomal recessive, juvenile) 2, parkin                                                     | 4.10E-02 | 1.4 | 9.83E-03 | 1.3 | 2.12E-01 | NS   |
| A_64_P095329  | XM_224421    |        |            |                                                                                                                 | 1.24E-02 | 1.4 | 8.67E-03 | 1.3 | 4.07E-01 | NS   |
| A_64_P009411  | NM_001014167 | 361751 | Rnls       | renalase, FAD-dependent amine oxidase                                                                           | 1.99E-02 | 1.4 | 3.39E-01 | NS  | 2.72E-01 | NS   |
| A_64_P145166  | NM_031756    | 81716  | Ggcs       | gamma-glutamyl carboxylase                                                                                      | 2.75E-02 | 1.4 | 3.64E-01 | NS  | 1.14E-02 | -1.5 |
| A_64_P144168  | NM_175577    | 25752  | Cd6        | Cd6 molecule                                                                                                    | 2.85E-02 | 1.4 | 3.20E-01 | NS  | 8.90E-02 | NS   |
| A_43_P14875   | NM_031324    | 83471  | Prep       | prolyl endopeptidase                                                                                            | 2.92E-02 | 1.4 | 1.80E-01 | NS  | 5.24E-01 | NS   |
| A_43_P13102   | NM_130399    | 24165  | Ada        | adenosine deaminase                                                                                             | 2.63E-02 | 1.4 | 1.00E-02 | 1.2 | 2.22E-01 | NS   |
| A_64_P146767  | NM_031343    | 83511  | Slc6a2     | solute carrier family 6 (neurotransmitter transporter, noradrenalin), member 2                                  | 2.42E-02 | 1.4 | 9.65E-02 | NS  | 3.97E-01 | NS   |
| A_64_P126560  | NM_001107463 | 308178 | Vps37c     | vacuolar protein sorting 37 homolog C (S. cerevisiae)                                                           | 4.68E-02 | 1.4 | 6.46E-01 | NS  | 1.13E-01 | NS   |
| A_64_P002076  | NM_001107540 | 308871 | Rnf121     | ring finger protein 121                                                                                         | 4.13E-02 | 1.4 | 1.94E-01 | NS  | 6.41E-01 | NS   |
| A_44_P473234  | XM_001078412 | 293511 | Znf688     | zinc finger protein 688                                                                                         | 2.80E-02 | 1.4 | 2.88E-01 | NS  | 4.97E-01 | NS   |
| A_64_P063107  | NM_001134763 | 81917  | Hip1r      | huntingtin interacting protein 1 related                                                                        | 3.95E-02 | 1.4 | 8.86E-01 | NS  | 8.74E-01 | NS   |
| A_44_P179282  | XM_001066628 | 260321 | Fkbp4      | FK506 binding protein 4                                                                                         | 3.13E-02 | 1.4 | 2.21E-02 | 1.1 | 1.65E-01 | NS   |
| A_64_P105377  | XM_213271    | 287157 | Wdr90      | WD repeat domain 90                                                                                             | 3.20E-02 | 1.4 | 1.26E-01 | NS  | 4.37E-01 | NS   |
| A_64_P059032  | NM_001107341 | 306810 | Susd3      | sushi domain containing 3                                                                                       | 3.55E-02 | 1.4 | 8.66E-02 | NS  | 2.96E-01 | NS   |
| A_42_P787743  | NM_001014159 | 361545 | Rbm42      | RNA binding motif protein 42                                                                                    | 2.76E-02 | 1.4 | 1.20E-01 | NS  | 5.70E-01 | NS   |
| A_44_P229710  | XM_001065500 | 362615 | Gpatch3    | G patch domain containing 3                                                                                     | 2.70E-02 | 1.4 | 2.16E-02 | 1.2 | 1.62E-01 | NS   |
| A_64_P038596  | XM_577863    | 502386 | RGD1566018 | similar to ovarian fibroin-like substance-1                                                                     | 4.17E-02 | 1.4 | 8.63E-01 | NS  | 5.58E-01 | NS   |
| A_43_P15489   | NM_133311    | 170819 | Il24       | interleukin 24                                                                                                  | 4.97E-02 | 1.4 | 4.05E-01 | NS  | 2.06E-02 | -1.9 |
| A_64_P128667  | NM_024132    | 29347  | Faah       | fatty acid amide hydrolase                                                                                      | 4.90E-02 | 1.4 | 2.13E-02 | 1.3 | 7.64E-02 | NS   |
| A_44_P592381  | CO563983     |        |            |                                                                                                                 | 1.70E-02 | 1.4 | 4.06E-02 | 1.2 | 5.44E-01 | NS   |
| A_42_P599062  | NM_053491    | 85253  | Plg        | plasminogen                                                                                                     | 1.86E-02 | 1.4 | 8.70E-02 | NS  | 7.15E-01 | NS   |
| A_64_P155099  | XM_001057715 | 680558 | LOC680558  | similar to solute carrier family 35 (UDP-glucuronic acid/UDP-N-acetylgalactosamine dual transporter), member D1 | 1.74E-02 | 1.4 | 4.91E-03 | 1.4 | 7.11E-02 | NS   |
| A_64_P315073  | NM_001100548 | 300996 | Rbm5       | RNA binding motif protein 5                                                                                     | 4.67E-02 | 1.4 | 5.27E-03 | 1.4 | 9.25E-02 | NS   |
| A_43_P17610   | NM_001037097 | 366697 | Sptlc2     | serine palmitoyltransferase, long chain base subunit 2                                                          | 1.63E-02 | 1.4 | 6.54E-03 | 1.2 | 8.81E-01 | NS   |
| A_42_P794613  | NM_031062    | 81726  | Mvd        | mevalonate (diphospho) decarboxylase                                                                            | 2.62E-02 | 1.4 | 8.34E-01 | NS  | 3.73E-01 | NS   |
| A_44_P975113  | NM_001014075 | 313949 | RGD1311648 | similar to hypothetical protein FLJ21820                                                                        | 3.31E-02 | 1.4 | 4.74E-01 | NS  | 2.36E-01 | NS   |
| A_64_P031691  | NM_012893    | 25365  | Actg2      | actin, gamma 2, smooth muscle, enteric                                                                          | 4.20E-02 | 1.4 | 5.31E-01 | NS  | 7.73E-01 | NS   |
| A_64_P002697  | XM_001054773 | 296417 | Ankrd60    | ankyrin repeat domain 60                                                                                        | 1.10E-02 | 1.4 | 3.48E-01 | NS  | 2.71E-01 | NS   |
| A_44_P292503  | NM_001002809 | 406169 | Atf6b      | activating transcription factor 6 beta                                                                          | 4.06E-02 | 1.4 | 5.68E-02 | NS  | 2.90E-01 | NS   |
| A_42_P826115  | NM_001109418 | 680531 | LOC680531  | similar to CG3880-PA                                                                                            | 1.75E-02 | 1.4 | 2.28E-01 | NS  | 1.61E-01 | NS   |
| A_43_P16664   | NM_001009630 | 288704 | RGD1311899 | similar to RIKEN cDNA 2210016L21 gene                                                                           | 3.77E-02 | 1.4 | 8.53E-01 | NS  | 1.28E-03 | -1.7 |
| A_44_P500431  | NM_053886    | 116666 | Lman1      | lectin, mannose-binding, 1                                                                                      | 3.84E-02 | 1.4 | 3.94E-02 | 1.1 | 5.71E-01 | NS   |
| A_64_P137037  | NM_017156    | 29295  | Cyp2b12    | cytochrome P450, family 2, subfamily b, polypeptide 12                                                          | 3.12E-02 | 1.4 | 8.62E-03 | 2.0 | 5.32E-01 | NS   |
| A_64_P151719  | NM_001100778 | 399489 | E2f1       | E2F transcription factor 1                                                                                      | 2.93E-02 | 1.4 | 5.31E-01 | NS  | 8.21E-01 | NS   |

|               |              |        |            |                                                                                                                                             |          |     |          |      |          |      |
|---------------|--------------|--------|------------|---------------------------------------------------------------------------------------------------------------------------------------------|----------|-----|----------|------|----------|------|
| A_44_P1023801 | NM_001108155 | 315740 | Kif23      | kinesin family member 23                                                                                                                    | 4.83E-02 | 1.4 | 3.37E-01 | NS   | 1.43E-02 | 1.8  |
| A_44_P281435  | NM_001013923 | 296318 | Ndrp3      | N-myc downstream regulated gene 3                                                                                                           | 2.17E-02 | 1.4 | 2.12E-02 | 1.3  | 3.55E-01 | NS   |
| A_64_P152091  | NM_001134642 | 503257 | Tmem194b   | transmembrane protein 194B                                                                                                                  | 2.41E-02 | 1.4 | 8.91E-01 | NS   | 2.54E-01 | NS   |
| A_42_P809733  | NM_001134584 | 363020 | RGD1309410 | LOC363020                                                                                                                                   | 2.37E-02 | 1.4 | 7.78E-01 | NS   | 2.77E-02 | -1.4 |
| A_64_P123507  | XM_001071932 | 689765 | B3gatl1    | beta 1,3-galactosyltransferase-like                                                                                                         | 3.96E-02 | 1.4 | 3.90E-01 | NS   | 9.24E-01 | NS   |
| A_44_P380332  | NM_001106996 | 303073 | Cyfp2      | cytoplasmic FMR1 interacting protein 2                                                                                                      | 8.76E-03 | 1.4 | 2.78E-01 | NS   | 1.63E-01 | NS   |
| A_64_P010658  | NM_019288    | 54226  | App        | amyloid beta (A4) precursor protein                                                                                                         | 2.91E-02 | 1.4 | 3.52E-01 | NS   | 3.74E-02 | -1.6 |
| A_64_P189793  | FQ220757     | 290659 | Cope       | coatamer protein complex, subunit epsilon                                                                                                   | 2.91E-02 | 1.4 | 1.11E-01 | NS   | 3.48E-02 | -1.4 |
| A_44_P331015  | XR_008354    |        |            |                                                                                                                                             | 2.96E-02 | 1.4 | 1.46E-02 | -1.9 | 9.23E-01 | NS   |
| A_43_P12780   | NM_053350    | 84114  | Agps       | alkylglycerone phosphate synthase                                                                                                           | 4.17E-02 | 1.4 | 6.09E-01 | NS   | 6.63E-01 | NS   |
| A_44_P421582  | NM_031676    | 63837  | Tagln3     | transgelin 3                                                                                                                                | 4.32E-02 | 1.4 | 5.89E-01 | NS   | 8.97E-01 | NS   |
| A_64_P152427  | XM_001066898 | 317189 | Diaph2     | diaphanous homolog 2 (Drosophila)                                                                                                           | 4.28E-02 | 1.4 | 1.10E-01 | NS   | 3.15E-01 | NS   |
| A_43_P17660   | NM_001100655 | 289786 | Nacad      | NAC alpha domain containing<br>KDEL (Lys-Asp-Glu-Leu) endoplasmic<br>reticulum protein retention receptor 2                                 | 3.91E-02 | 1.4 | 6.80E-01 | NS   | 2.19E-01 | NS   |
| A_44_P419337  | NM_001013122 | 304290 | Kdelr2     | reticulum protein retention receptor 2                                                                                                      | 4.41E-02 | 1.4 | 1.01E-02 | 1.2  | 2.30E-01 | NS   |
| A_64_P099923  | NM_022526    | 64322  | Dap        | death-associated protein                                                                                                                    | 4.44E-02 | 1.4 | 3.30E-01 | NS   | 5.84E-01 | NS   |
| A_43_P11800   | NM_017059    | 24887  | Bax        | Bcl2-associated X protein                                                                                                                   | 3.99E-02 | 1.4 | 1.28E-01 | NS   | 2.39E-01 | NS   |
| A_42_P506402  | NM_145677    | 246771 | Slc25a25   | solute carrier family 25 (mitochondrial<br>carrier, phosphate carrier), member 25                                                           | 3.65E-02 | 1.4 | 6.26E-01 | NS   | 4.11E-01 | NS   |
| A_64_P046125  | NM_001128155 | 497936 | Tmem88     | transmembrane protein 88                                                                                                                    | 4.44E-02 | 1.4 | 3.82E-01 | NS   | 1.83E-03 | -1.6 |
| A_64_P009310  | NM_019181    | 29270  | Spr        | sepiapterin reductase (7,8-<br>dihydrobiopterin:NADP+ oxidoreductase)                                                                       | 4.06E-02 | 1.4 | 2.08E-01 | NS   | 8.29E-02 | NS   |
| A_64_P003779  | NM_001025742 | 362836 | Dazap1     | DAZ associated protein 1                                                                                                                    | 4.37E-02 | 1.4 | 6.55E-01 | NS   | 5.03E-01 | NS   |
| A_64_P006132  | NM_001106997 | 303101 | Maml1      | mastermind like 1 (Drosophila)                                                                                                              | 2.70E-02 | 1.4 | 9.29E-01 | NS   | 4.09E-02 | -1.4 |
| A_42_P826191  | NM_031591    | 29583  | Pecam1     | platelet/endothelial cell adhesion molecule<br>1                                                                                            | 4.40E-02 | 1.4 | 1.29E-02 | -1.2 | 1.37E-01 | NS   |
| A_42_P563382  | NM_001109152 | 499211 | Gdpd5      | glycerophosphodiester phosphodiesterase<br>domain containing 5                                                                              | 4.21E-02 | 1.4 | 7.80E-01 | NS   | 8.68E-03 | -1.6 |
| A_44_P995906  | NM_001108204 | 316235 | Polh       | polymerase (DNA directed), eta                                                                                                              | 1.86E-02 | 1.4 | 7.00E-01 | NS   | 2.87E-01 | NS   |
| A_44_P537024  | NM_001109670 | 362942 | Gpr172b    | G protein-coupled receptor 172B                                                                                                             | 3.16E-02 | 1.4 | 1.38E-01 | NS   | 2.14E-01 | NS   |
| A_64_P052230  | NM_001013966 | 303067 | Thg1l      | tRNA-histidine guanylyltransferase 1-like<br>(S. cerevisiae)                                                                                | 3.72E-02 | 1.4 | 8.49E-02 | NS   | 5.06E-01 | NS   |
| A_42_P527141  | NM_031633    | 58921  | Foxm1      | forkhead box M1                                                                                                                             | 1.28E-02 | 1.4 | 1.01E-01 | NS   | 8.33E-01 | NS   |
| A_44_P319087  | NM_001107923 | 313131 | Rngtt      | RNA guanylyltransferase and 5'-<br>phosphatase                                                                                              | 2.53E-02 | 1.4 | 4.68E-02 | 1.2  | 7.65E-02 | NS   |
| A_44_P125432  | NM_001105723 | 25574  | Ubtf       | upstream binding transcription factor, RNA<br>polymerase I                                                                                  | 3.35E-02 | 1.4 | 9.86E-01 | NS   | 1.84E-03 | -1.5 |
| A_64_P055994  | NM_001004424 | 360962 | Tacc3      | transforming, acidic coiled-coil containing<br>protein 3                                                                                    | 3.71E-02 | 1.4 | 4.95E-02 | 1.2  | 1.28E-01 | NS   |
| A_42_P842580  | NM_001107305 | 306348 | RGD1566239 | similar to RIKEN cDNA 2810428115                                                                                                            | 4.90E-02 | 1.4 | 1.26E-01 | NS   | 9.72E-01 | NS   |
| A_44_P252559  | NM_001000890 | 405191 | Olr1682    | olfactory receptor 1682                                                                                                                     | 2.56E-02 | 1.4 | 1.52E-01 | NS   | 1.80E-01 | NS   |
| A_64_P063358  | NM_001108901 | 365038 | Samd5      | sterile alpha motif domain containing 5<br>asparagine-linked glycosylation 3, alpha-<br>1,3- mannosyltransferase homolog (S.<br>cerevisiae) | 4.16E-02 | 1.4 | 2.88E-02 | 1.4  | 7.05E-02 | NS   |
| A_64_P159827  | NM_001142363 | 287983 | Alg3       | hypothetical protein LOC691649                                                                                                              | 2.16E-02 | 1.4 | 4.52E-01 | NS   | 1.89E-01 | NS   |
| A_64_P156051  | XM_001079150 | 691649 | LOC691649  | XK, Kell blood group complex subunit-<br>related family, member 5                                                                           | 4.57E-02 | 1.4 | 2.95E-01 | NS   | 8.70E-02 | NS   |
| A_42_P671422  | NM_001012228 | 497083 | Xkr5       | Tnf receptor-associated factor 6                                                                                                            | 3.83E-02 | 1.4 | 7.04E-02 | NS   | 3.57E-01 | NS   |
| A_44_P433773  | NM_001107754 | 311245 | Traf6      |                                                                                                                                             | 4.11E-02 | 1.4 | 3.57E-01 | NS   | 1.55E-01 | NS   |
| A_44_P220617  | XM_346086    |        |            |                                                                                                                                             | 7.45E-03 | 1.4 | 6.34E-01 | NS   | 2.46E-01 | NS   |
| A_44_P144237  | NM_053961    | 117030 | Erp29      | endoplasmic reticulum protein 29                                                                                                            | 1.05E-02 | 1.4 | 9.39E-03 | 1.3  | 2.27E-01 | NS   |
| A_44_P712484  | XM_222205    | 304503 | RGD1309762 | similar to KIAA0614 protein                                                                                                                 | 4.28E-02 | 1.4 | 4.09E-01 | NS   | 3.71E-01 | NS   |
| A_64_P090413  | NM_199094    | 296554 | Tubb2c     | tubulin, beta 2c                                                                                                                            | 6.17E-03 | 1.4 | 2.46E-02 | 1.3  | 7.56E-01 | NS   |
| A_64_P140818  | XM_001056810 |        |            |                                                                                                                                             | 1.66E-02 | 1.4 | 6.11E-02 | NS   | 8.35E-01 | NS   |
| A_44_P278562  | AY325172     |        |            |                                                                                                                                             | 3.02E-02 | 1.4 | 1.93E-02 | 1.3  | 5.52E-02 | NS   |
| A_64_P065981  | NM_001025129 | 361018 | Fam107a    | family with sequence similarity 107,<br>member A                                                                                            | 1.18E-02 | 1.4 | 3.34E-01 | NS   | 1.78E-01 | NS   |
| A_42_P473425  | NM_138844    | 192177 | Unc13d     | unc-13 homolog D (C. elegans)                                                                                                               | 2.02E-02 | 1.4 | 1.65E-01 | NS   | 7.42E-01 | NS   |
| A_64_P115661  | NM_001105754 |        |            |                                                                                                                                             | 4.85E-02 | 1.4 | 8.03E-01 | NS   | 1.18E-01 | NS   |

|               |              |           |              |                                                                           |          |     |          |     |          |      |
|---------------|--------------|-----------|--------------|---------------------------------------------------------------------------|----------|-----|----------|-----|----------|------|
| A_64_P050025  | NM_001013980 | 304138    | Cyrr1        | cysteine/tyrosine-rich 1                                                  | 4.72E-02 | 1.4 | 2.88E-01 | NS  | 1.01E-02 | -1.7 |
| A_64_P025803  | NM_144752    | 246268    | Oas1b        | 2-5 oligoadenylate synthetase 1B                                          | 3.66E-02 | 1.4 | 9.22E-01 | NS  | 4.76E-02 | -1.2 |
| A_64_P112429  | NM_001037549 | 641624    | Defb5        | defensin beta 5                                                           | 4.55E-02 | 1.4 | 2.35E-01 | NS  | 1.30E-01 | NS   |
| A_64_P081282  | XR_008598    |           |              |                                                                           | 1.20E-02 | 1.4 | 7.73E-02 | NS  | 8.21E-01 | NS   |
| A_64_P078520  | NM_001100517 | 292023    | Aars         | alanyl-tRNA synthetase activating signal cointegrator 1 complex subunit 3 | 3.66E-02 | 1.4 | 3.20E-01 | NS  | 5.17E-01 | NS   |
| A_44_P124772  | NM_001107640 | 309887    | Ascc3        | activating signal cointegrator 1 complex subunit 3                        | 3.16E-02 | 1.4 | 1.92E-02 | 1.2 | 2.05E-01 | NS   |
| A_64_P134571  | NM_001109540 | 689576    | Nkain3       | Na+/K+ transporting ATPase interacting 3                                  | 2.08E-02 | 1.4 | 5.27E-01 | NS  | 1.55E-01 | NS   |
| A_44_P279222  | NM_001108698 | 362678    | RGD1308923   | LOC362678                                                                 | 2.16E-02 | 1.4 | 1.87E-01 | NS  | 5.11E-01 | NS   |
| A_44_P727274  | NM_001126495 | 364996    | Chtf8        | CTF8, chromosome transmission fidelity factor 8 homolog (S. cerevisiae)   | 2.16E-02 | 1.4 | 9.59E-01 | NS  | 1.02E-01 | NS   |
| A_64_P001679  | NM_001114603 | 291649    | Pcdhb10      | protocadherin beta 10                                                     | 1.10E-02 | 1.4 | 9.68E-03 | 1.2 | 1.43E-01 | NS   |
| A_44_P851620  | NM_001107690 | 310640    | Fam189b      | family with sequence similarity 189, member B                             | 3.47E-02 | 1.4 | 9.53E-01 | NS  | 1.34E-01 | NS   |
| A_42_P783572  | NM_012504    | 24211     | Atp1a1       | ATPase, Na+/K+ transporting, alpha 1 polypeptide                          | 3.93E-02 | 1.4 | 1.36E-02 | 1.3 | 1.91E-01 | NS   |
| A_64_P110409  | NM_001105870 | 288006    | Rtp1         | receptor (chemosensory) transporter protein 1                             | 1.56E-02 | 1.4 | 8.92E-01 | NS  | 9.33E-02 | NS   |
| A_64_P040855  | NM_001000110 | 292559    | Olr3         | olfactory receptor 3                                                      | 4.26E-02 | 1.4 | 5.69E-01 | NS  | 7.08E-01 | NS   |
| A_64_P129850  | NM_001002855 | 442921    | Prm3         | primate 3                                                                 | 1.98E-02 | 1.4 | 6.16E-01 | NS  | 8.59E-01 | NS   |
| A_64_P042099  | XM_001063442 |           |              |                                                                           | 2.50E-02 | 1.4 | 1.71E-01 | NS  | 2.19E-01 | NS   |
| A_64_P155193  | NM_021653    | 25430     | Dio1         | deiodinase, iodothyronine, type I                                         | 3.87E-02 | 1.4 | 2.69E-03 | 1.6 | 3.22E-01 | NS   |
| A_64_P066226  | XM_001071740 | 499072    | RGD1565210   | RGD1565210                                                                | 3.14E-02 | 1.4 | 2.78E-01 | NS  | 6.84E-02 | NS   |
| A_44_P910533  | XM_343671    | 363333    | Chaf1a       | chromatin assembly factor 1, subunit A (p150)                             | 1.11E-02 | 1.4 | 1.35E-01 | NS  | 2.14E-01 | NS   |
| A_64_P146654  | NM_031698    | 64701     | Rpn2         | ribophorin II                                                             | 5.92E-03 | 1.4 | 9.60E-03 | 1.3 | 6.52E-01 | NS   |
| A_64_P079870  | NM_001134535 | 303812    | Vwa5b2       | von Willebrand factor A domain containing 5B2                             | 4.02E-02 | 1.4 | 6.91E-01 | NS  | 7.64E-01 | NS   |
| A_44_P300919  | NM_001011956 | 296098    | Lcmt2        | leucine carboxyl methyltransferase 2                                      | 3.69E-02 | 1.4 | 1.76E-02 | 1.2 | 1.51E-01 | NS   |
| A_64_P131001  | NM_001106124 | 291328    | Slc39a12     | solute carrier family 39 (zinc transporter), member 12                    | 3.15E-02 | 1.4 | 7.30E-01 | NS  | 2.38E-01 | NS   |
| A_64_P032918  | NM_001024237 | 288917    | Farsa        | phenylalanyl-tRNA synthetase, alpha subunit                               | 2.21E-02 | 1.4 | 4.70E-02 | 1.1 | 4.60E-01 | NS   |
| A_44_P478066  | NM_001106335 | 293733    | Incenp       | inner centromere protein                                                  | 2.10E-02 | 1.4 | 1.21E-03 | 1.4 | 1.26E-02 | 2.3  |
| A_64_P043086  | NM_001108339 | 360821    | Gatc         | glutamyl-tRNA(Gln) amidotransferase, subunit C homolog (bacterial)        | 3.91E-02 | 1.4 | 3.36E-01 | NS  | 7.97E-01 | NS   |
| A_44_P138838  | NM_001008805 | 407757    | Krt76        | keratin 76                                                                | 1.48E-02 | 1.4 | 5.40E-01 | NS  | 1.53E-01 | NS   |
| A_43_P12325   | NM_022860    | 64828     | B4galnt1     | beta-1,4-N-acetyl-galactosaminyl transferase 1                            | 4.02E-02 | 1.4 | 2.44E-02 | 1.5 | 9.42E-01 | NS   |
| A_64_P201730  | NM_019306    | 54251     | Flt1         | fms-related tyrosine kinase 1                                             | 6.99E-03 | 1.4 | 5.28E-01 | NS  | 2.98E-02 | -1.3 |
| A_64_P067550  | XM_001071529 |           |              |                                                                           | 1.34E-02 | 1.4 | 2.44E-01 | NS  | 6.45E-01 | NS   |
| A_44_P508733  | NM_001137626 | 291105    | E2f3         | E2F transcription factor 3                                                | 4.53E-02 | 1.4 | 5.48E-01 | NS  | 3.02E-01 | NS   |
| A_43_P17061   | BC167000     | 305624    | Pcgf3        | polycomb group ring finger 3                                              | 3.16E-02 | 1.4 | 6.05E-01 | NS  | 9.30E-01 | NS   |
| A_44_P121736  | XM_346293    | 367772    | RGD1564338   | similar to aminoacylase 1                                                 | 1.25E-02 | 1.4 | 1.03E-03 | 1.4 | 7.16E-02 | NS   |
| A_64_P106162  | NM_001108377 | 361042    | Pck2         | phosphoenolpyruvate carboxykinase 2 (mitochondrial)                       | 2.85E-02 | 1.4 | 2.68E-01 | NS  | 8.64E-02 | NS   |
| A_64_P135416  | NM_001172151 | 498902    | Cmtm4        | CKLF-like MARVEL transmembrane domain containing 4                        | 1.97E-02 | 1.4 | 6.33E-01 | NS  | 6.23E-01 | NS   |
| A_44_P1010482 | NM_001109416 | 680493    | Cd3eap       | CD3e molecule, epsilon associated protein                                 | 7.09E-03 | 1.4 | 2.16E-01 | NS  | 5.22E-01 | NS   |
| A_64_P025578  | NM_001109497 | 688394    | Mab211l      | mab-21-like 1 (C. elegans)                                                | 2.38E-02 | 1.4 | 2.08E-01 | NS  | 2.50E-01 | NS   |
| A_64_P047221  | NM_019276    | 50555     | Ugt8         | UDP glycosyltransferase 8                                                 | 2.25E-02 | 1.4 | 9.13E-01 | NS  | 5.07E-03 | -2.1 |
| A_64_P026943  | NM_012565    | 24385     | Gck          | glucokinase                                                               | 1.73E-02 | 1.4 | 3.96E-01 | NS  | 6.34E-01 | NS   |
| A_44_P1040230 | NM_001106346 | 293864    | Ubl4         | ubiquitin-like 4                                                          | 4.19E-02 | 1.5 | 5.51E-01 | NS  | 2.42E-01 | NS   |
| A_44_P472776  | NM_053317    | 58850     | Nr0b1        | nuclear receptor subfamily 0, group B, member 1                           | 2.64E-02 | 1.5 | 3.98E-01 | NS  | 3.26E-01 | NS   |
| A_42_P539095  | XM_001081794 | 688311    | LOC688311    | similar to ADP-ribosylation factor-like 1                                 | 3.34E-02 | 1.5 | 5.99E-01 | NS  | 2.60E-01 | NS   |
| A_44_P280659  | NM_001100971 | 305579    | RGD1305110   | similar to KIAA1841 protein                                               | 4.09E-02 | 1.5 | 1.61E-01 | NS  | 5.74E-02 | NS   |
| A_64_P130159  | NM_001177824 | 100363193 | LOC100363193 | LRRGT00076-like                                                           | 4.72E-02 | 1.5 | 4.14E-01 | NS  | 5.22E-01 | NS   |
| A_64_P075640  | NM_012848    | 25319     | Fth1         | ferritin, heavy polypeptide 1                                             | 2.63E-02 | 1.5 | 2.06E-01 | NS  | 9.56E-02 | NS   |

|              |              |        |           |                                                                                                                   |          |     |          |     |          |      |
|--------------|--------------|--------|-----------|-------------------------------------------------------------------------------------------------------------------|----------|-----|----------|-----|----------|------|
| A_64_P122267 | NM_001013983 | 304543 | Mlec      | malectin                                                                                                          | 7.37E-03 | 1.5 | 3.38E-01 | NS  | 1.26E-01 | NS   |
| A_44_P346832 | XM_213790    | 288689 | Tesc      | tescalcin                                                                                                         | 2.07E-02 | 1.5 | 2.60E-01 | NS  | 9.03E-01 | NS   |
| A_64_P108354 | XM_001054556 | 679812 | Plekhhg1  | pleckstrin homology domain containing, family G (with RhoGef domain) member 1 similar to UPF0197 protein C11orf10 | 4.76E-02 | 1.5 | 6.87E-01 | NS  | 5.14E-01 | NS   |
| A_64_P025507 | XM_001076350 | 680191 | LOC680191 | homolog                                                                                                           | 1.72E-02 | 1.5 | 1.89E-03 | 1.3 | 2.46E-01 | NS   |
| A_44_P440988 | NM_001106393 | 294456 | Nt5dc1    | 5'-nucleotidase domain containing 1                                                                               | 4.49E-02 | 1.5 | 1.09E-01 | NS  | 7.91E-02 | NS   |
| A_64_P027941 | XM_002725263 |        |           | family with sequence similarity 65, member B                                                                      | 1.50E-02 | 1.5 | 1.27E-01 | NS  | 9.19E-01 | NS   |
| A_44_P184659 | NM_001014009 | 306934 | Fam65b    |                                                                                                                   | 1.72E-02 | 1.5 | 4.27E-01 | NS  | 3.15E-01 | NS   |
| A_64_P035152 | NM_001107044 | 303497 | Osbpl7    | oxysterol binding protein-like 7                                                                                  | 2.58E-02 | 1.5 | 1.35E-01 | NS  | 4.23E-02 | -1.7 |
| A_64_P150083 | NM_001135896 | 362945 | Lrrc24    | leucine rich repeat containing 24                                                                                 | 1.54E-02 | 1.5 | 1.58E-02 | 1.4 | 1.40E-02 | -1.8 |
| A_64_P042455 | XM_001058094 |        |           |                                                                                                                   | 2.51E-02 | 1.5 | 6.67E-01 | NS  | 3.09E-01 | NS   |
| A_44_P506017 | XM_002725279 |        |           |                                                                                                                   | 3.17E-02 | 1.5 | 1.64E-01 | NS  | 2.10E-01 | NS   |
| A_64_P142330 | XM_001066513 |        |           |                                                                                                                   | 1.56E-02 | 1.5 | 9.79E-02 | NS  | 2.10E-01 | NS   |
| A_64_P098394 | BC158841     |        |           |                                                                                                                   | 2.59E-02 | 1.5 | 7.53E-02 | NS  | 5.05E-02 | NS   |
| A_64_P102518 | NM_201416    | 292067 | Zc3h18    | zinc finger CCCH-type containing 18                                                                               | 4.80E-02 | 1.5 | 6.03E-01 | NS  | 6.99E-01 | NS   |
| A_44_P149662 | NM_001024979 | 295228 | Gpatch4   | G patch domain containing 4                                                                                       | 4.36E-02 | 1.5 | 5.29E-01 | NS  | 3.63E-01 | NS   |
| A_64_P156473 | NM_001107121 | 304293 | Zfp316    | zinc finger protein 316                                                                                           | 1.18E-02 | 1.5 | 4.22E-01 | NS  | 1.08E-01 | NS   |
| A_43_P23458  | NM_001107508 | 308564 | Klk12     | kallikrein related-peptidase 12                                                                                   | 4.44E-02 | 1.5 | 5.56E-01 | NS  | 4.64E-01 | NS   |
| A_64_P001824 | NM_001109630 | 691209 | Slc12a6   | solute carrier family 12, member 6                                                                                | 2.19E-02 | 1.5 | 7.37E-01 | NS  | 4.84E-01 | NS   |
| A_44_P140358 | XM_230789    |        |           |                                                                                                                   | 4.89E-02 | 1.5 | 6.37E-01 | NS  | 8.46E-01 | NS   |
| A_64_P140193 | NM_001014195 | 362711 | Tmem214   | transmembrane protein 214                                                                                         | 1.35E-02 | 1.5 | 3.76E-03 | 1.2 | 1.23E-02 | -1.5 |
| A_43_P12806  | NM_053439    | 84509  | Ran       | RAN, member RAS oncogene family                                                                                   | 3.27E-02 | 1.5 | 9.05E-03 | 1.2 | 3.60E-01 | NS   |
| A_64_P010891 | XM_001055051 | 679950 | Hist2h3c  | histone cluster 2, H3c                                                                                            | 2.61E-02 | 1.5 | 7.38E-03 | 1.6 | 5.96E-01 | NS   |
| A_42_P687819 | NM_001109241 | 500200 | Atoh8     | atonal homolog 8 (Drosophila) similar to UPF0197 protein C11orf10                                                 | 4.82E-03 | 1.5 | 7.62E-03 | 1.3 | 6.24E-01 | NS   |
| A_64_P095948 | XM_001073421 | 690138 | LOC690138 | homolog                                                                                                           | 1.82E-02 | 1.5 | 1.64E-02 | 1.2 | 1.85E-01 | NS   |
| A_44_P463313 | NM_017100    | 25515  | Plk1      | polo-like kinase 1 (Drosophila)                                                                                   | 1.51E-02 | 1.5 | 5.80E-03 | 1.3 | 1.06E-01 | NS   |
| A_64_P134873 | XM_001076034 |        |           |                                                                                                                   | 3.27E-02 | 1.5 | 5.71E-01 | NS  | 1.20E-01 | NS   |
| A_44_P175807 | NM_001024892 | 317241 | Rlim      | ring finger protein, LIM domain interacting SHC (Src homology 2 domain containing) transforming protein 1         | 4.48E-02 | 1.5 | 2.90E-01 | NS  | 3.87E-01 | NS   |
| A_64_P019295 | NM_001164060 | 85385  | Shc1      | DEAH (Asp-Glu-Ala-His) box polypeptide 36                                                                         | 2.32E-02 | 1.5 | 9.31E-01 | NS  | 1.17E-01 | NS   |
| A_43_P19947  | NM_001107678 | 310461 | Dhx36     |                                                                                                                   | 4.12E-02 | 1.5 | 9.16E-01 | NS  | 1.06E-01 | NS   |
| A_64_P079609 | NM_001044295 | 689256 | Tpd52l1   | tumor protein D52-like 1                                                                                          | 4.00E-02 | 1.5 | 2.98E-02 | 1.2 | 7.37E-02 | NS   |
| A_64_P071193 | XM_001079214 | 287063 | Nmral1    | NmrA-like family domain containing 1                                                                              | 4.13E-02 | 1.5 | 1.38E-01 | NS  | 9.44E-02 | NS   |
| A_64_P119901 | NM_172329    | 282832 | Ccr9      | chemokine (C-C motif) receptor 9                                                                                  | 4.84E-02 | 1.5 | 1.95E-01 | NS  | 2.06E-01 | NS   |
| A_64_P006357 | XM_002727381 |        |           | ankyrin repeat and SOCS box-containing                                                                            | 3.67E-02 | 1.5 | 2.12E-02 | 1.4 | 6.59E-01 | NS   |
| A_64_P003209 | NM_001108420 | 361268 | Asb13     | 13                                                                                                                | 6.37E-03 | 1.5 | 8.84E-01 | NS  | 2.39E-01 | NS   |
| A_64_P165168 | NM_001108662 | 362510 | Melk      | maternal embryonic leucine zipper kinase                                                                          | 2.14E-02 | 1.5 | 2.12E-03 | 1.4 | 1.22E-01 | NS   |
| A_64_P129755 | NM_001105758 | 252889 | Tmed7     | transmembrane emp24 protein transport domain containing 7                                                         | 4.92E-02 | 1.5 | 3.70E-02 | 1.1 | 1.44E-01 | NS   |
| A_64_P052745 | XM_236988    | 316273 | Mcm3      | minichromosome maintenance complex component 3                                                                    | 4.03E-02 | 1.5 | 1.05E-01 | NS  | 7.22E-01 | NS   |
| A_64_P142194 | NM_053426    | 84486  | Sf3b1     | splicing factor 3b, subunit 1                                                                                     | 3.99E-02 | 1.5 | 6.67E-01 | NS  | 6.29E-01 | NS   |
| A_64_P070957 | XM_001070294 | 499866 | Fam98b    | family with sequence similarity 98, member B                                                                      | 3.15E-02 | 1.5 | 4.56E-01 | NS  | 7.83E-02 | NS   |
| A_44_P288982 | NM_001107913 | 313049 | Zbtb8a    | zinc finger and BTB domain containing 8a                                                                          | 3.31E-02 | 1.5 | 3.18E-01 | NS  | 5.13E-03 | -2.0 |
| A_64_P062343 | NM_001037777 | 305880 | Lrp10     | low-density lipoprotein receptor-related protein 10                                                               | 4.42E-02 | 1.5 | 2.39E-02 | 1.2 | 1.51E-02 | -1.5 |
| A_64_P146228 | NM_080583    | 140670 | Ap2b1     | adaptor-related protein complex 2, beta 1 subunit                                                                 | 4.99E-02 | 1.5 | 3.19E-01 | NS  | 5.71E-03 | -1.6 |
| A_43_P13339  | NM_138914    | 192348 | Fnbp1     | formin binding protein 1                                                                                          | 4.23E-02 | 1.5 | 2.72E-01 | NS  | 2.18E-02 | -1.7 |
| A_64_P082446 | NM_001109562 | 689984 | Gpr137    | G protein-coupled receptor 137                                                                                    | 1.17E-02 | 1.5 | 5.27E-01 | NS  | 1.36E-01 | NS   |
| A_64_P058162 | S73424       | 81683  | Mif       | macrophage migration inhibitory factor                                                                            | 2.69E-02 | 1.5 | 4.57E-02 | 1.2 | 3.43E-02 | -1.6 |
| A_64_P249541 | XM_001066190 | 316229 | Ttbk1     | tau tubulin kinase 1                                                                                              | 3.93E-02 | 1.5 | 3.89E-01 | NS  | 6.49E-02 | NS   |
| A_64_P070078 | BF285572     | 690414 | LOC690414 | hypothetical protein LOC690414                                                                                    | 4.45E-02 | 1.5 | 4.45E-01 | NS  | 4.76E-01 | NS   |
| A_43_P15918  | NM_001100488 | 266780 | Rimbp2    | RIMS binding protein 2                                                                                            | 3.17E-02 | 1.5 | 8.54E-01 | NS  | 1.15E-01 | NS   |

|               |              |        |            |                                                                                                  |          |     |          |     |          |      |
|---------------|--------------|--------|------------|--------------------------------------------------------------------------------------------------|----------|-----|----------|-----|----------|------|
| A_44_P1034522 | NM_001008772 | 312952 | Impad1     | inositol monophosphatase domain containing 1                                                     | 4.05E-02 | 1.5 | 2.49E-01 | NS  | 8.65E-01 | NS   |
| A_42_P461794  | NM_001013080 | 296566 | Clic3      | chloride intracellular channel 3                                                                 | 1.55E-02 | 1.5 | 7.42E-02 | NS  | 2.37E-01 | NS   |
| A_64_P111903  | NM_001105925 | 288626 | Mmp17      | matrix metalloproteinase 17                                                                      | 2.60E-02 | 1.5 | 9.92E-01 | NS  | 9.41E-02 | NS   |
| A_64_P047661  | XM_001054448 |        |            |                                                                                                  | 6.52E-03 | 1.5 | 8.40E-01 | NS  | 1.75E-01 | NS   |
| A_44_P111337  | NM_001108724 | 362788 | Traf3      | Tnf receptor-associated factor 3                                                                 | 3.12E-02 | 1.5 | 8.66E-01 | NS  | 3.42E-01 | NS   |
| A_44_P1057412 | NM_031630    | 58856  | Ddx25      | DEAD (Asp-Glu-Ala-Asp) box polypeptide 25                                                        | 3.02E-02 | 1.5 | 4.38E-02 | 1.1 | 9.96E-01 | NS   |
| A_64_P138430  | XM_001055507 | 500917 | Odf3b      | outer dense fiber of sperm tails 3B                                                              | 3.97E-02 | 1.5 | 7.72E-01 | NS  | 1.33E-02 | -1.6 |
| A_44_P501898  | NM_001105773 | 287146 | Chtf18     | CTF18, chromosome transmission fidelity factor 18 homolog (S. cerevisiae)                        | 4.66E-03 | 1.5 | 1.18E-01 | NS  | 1.57E-01 | NS   |
| A_64_P088397  | NM_001025651 | 297872 | Sytl1      | synaptotagmin-like 1                                                                             | 3.39E-02 | 1.5 | 4.42E-01 | NS  | 6.13E-01 | NS   |
| A_64_P100963  | XR_085785    | 680089 | Ncaph      | non-SMC condensin I complex, subunit H                                                           | 3.93E-02 | 1.5 | 1.17E-01 | NS  | 6.61E-01 | NS   |
| A_64_P034456  | NM_001012065 | 308453 | Adck4      | aaRF domain containing kinase 4                                                                  | 3.73E-02 | 1.5 | 4.23E-01 | NS  | 4.03E-02 | -1.3 |
| A_43_P15302   | NM_024488    | 80278  | Cdk5rap3   | CDK5 regulatory subunit associated protein 3                                                     | 4.02E-02 | 1.5 | 6.32E-03 | 1.3 | 1.90E-01 | NS   |
| A_44_P889931  | NM_001100584 | 309051 | Pign       | phosphatidylinositol glycan, class N xylosylprotein beta1,4-galactosyltransferase, polypeptide 7 | 1.58E-02 | 1.5 | 2.74E-02 | 1.2 | 2.14E-01 | NS   |
| A_43_P18485   | NM_001031661 | 364675 | B4galt7    | (galactosyltransferase I)                                                                        | 2.79E-02 | 1.5 | 5.21E-02 | NS  | 4.95E-01 | NS   |
| A_64_P164601  | XM_001061072 | 500926 | RGD1562157 | similar to olfactory receptor Olfr287                                                            | 3.59E-02 | 1.5 | 5.56E-01 | NS  | 4.82E-02 | -2.1 |
| A_64_P091953  | NM_001008871 | 408233 | Spink4     | serine peptidase inhibitor, Kazal type 4                                                         | 1.33E-02 | 1.5 | 7.87E-01 | NS  | 9.88E-02 | NS   |
| A_44_P1045834 | NM_001108781 | 363145 | Gmppb      | GDP-mannose pyrophosphorylase B                                                                  | 1.65E-02 | 1.5 | 6.62E-03 | 1.5 | 6.85E-01 | NS   |
| A_44_P310386  | NM_001107426 | 307821 | Psmad7     | proteasome (prosome, macropain) 26S subunit, non-ATPase, 7                                       | 4.53E-02 | 1.5 | 8.85E-01 | NS  | 8.74E-01 | NS   |
| A_64_P079751  | NM_030848    | 81506  | Bst1       | bone marrow stromal cell antigen 1                                                               | 4.55E-02 | 1.5 | 2.94E-01 | NS  | 2.72E-01 | NS   |
| A_64_P098779  | NM_001005265 | 54243  | Cr1l       | complement component (3b/4b) receptor 1-like                                                     | 3.82E-02 | 1.5 | 1.52E-01 | NS  | 2.02E-02 | -1.5 |
| A_64_P030272  | XM_001069708 | 501588 | Tex11      | testis expressed 11                                                                              | 1.03E-02 | 1.5 | 7.32E-01 | NS  | 3.16E-01 | NS   |
| A_64_P055936  | XR_008912    |        |            |                                                                                                  | 2.75E-02 | 1.5 | 3.63E-01 | NS  | 1.00E-01 | NS   |
| A_44_P520045  | NM_001001371 | 288881 | Olr1002    | olfactory receptor 1002                                                                          | 2.22E-02 | 1.5 | 9.03E-01 | NS  | 1.25E-01 | NS   |
| A_42_P535608  | NM_001107160 | 304648 | Asf1b      | ASF1 anti-silencing function 1 homolog B (S. cerevisiae)                                         | 3.12E-02 | 1.5 | 3.40E-03 | 1.4 | 4.73E-02 | 2.6  |
| A_64_P121816  | NM_001106769 | 299611 | Apc2       | adenomatosis polyposis coli 2                                                                    | 3.75E-02 | 1.5 | 3.60E-01 | NS  | 1.57E-01 | NS   |
| A_44_P1058916 | NM_001013923 | 296318 | Ndr3       | N-myc downstream regulated gene 3                                                                | 3.50E-02 | 1.5 | 1.52E-03 | 1.3 | 4.85E-01 | NS   |
| A_64_P107876  | XM_344763    |        |            |                                                                                                  | 2.97E-02 | 1.5 | 3.71E-01 | NS  | 4.54E-02 | -1.5 |
| A_64_P135634  | NM_001044295 | 689256 | Tpd52l1    | tumor protein D52-like 1                                                                         | 4.78E-02 | 1.5 | 3.58E-01 | NS  | 7.06E-02 | NS   |
| A_64_P139108  |              | 85254  | Slc44a1    | solute carrier family 44, member 1                                                               | 4.59E-02 | 1.5 | 2.64E-01 | NS  | 5.83E-01 | NS   |
| A_44_P156317  | NM_138910    | 192275 | Dad1       | defender against cell death 1                                                                    | 2.70E-02 | 1.5 | 3.51E-02 | 1.2 | 4.08E-02 | -1.6 |
| A_64_P001157  | NM_001106745 | 299202 | Rps6kl1    | ribosomal protein S6 kinase-like 1                                                               | 2.95E-02 | 1.5 | 4.87E-01 | NS  | 5.15E-01 | NS   |
| A_44_P180017  | NM_052804    | 24948  | Fmr1       | fragile X mental retardation 1                                                                   | 3.00E-02 | 1.5 | 6.66E-01 | NS  | 2.87E-01 | NS   |
| A_42_P687645  | NM_001134995 | 683570 | Gnpda1     | glucosamine-6-phosphate deaminase 1                                                              | 1.07E-02 | 1.5 | 2.44E-02 | 1.2 | 9.09E-01 | NS   |
| A_64_P124200  | NM_053930    | 116727 | Gp1bb      | glycoprotein Ib (platelet), beta polypeptide                                                     | 1.67E-02 | 1.5 | 3.90E-01 | NS  | 7.15E-01 | NS   |
| A_64_P116176  | XM_001056308 |        |            |                                                                                                  | 3.24E-02 | 1.5 | 8.64E-01 | NS  | 1.21E-01 | NS   |
| A_42_P599210  | NM_001008326 | 300689 | Rexo2      | REX2, RNA exonuclease 2 homolog (S. cerevisiae)                                                  | 4.49E-02 | 1.5 | 1.14E-01 | NS  | 7.16E-01 | NS   |
| A_64_P015188  | XM_002727122 |        |            |                                                                                                  | 2.73E-02 | 1.5 | 3.95E-01 | NS  | 6.68E-01 | NS   |
| A_64_P155330  | XM_001059721 | 682074 | LOC682074  | similar to marapsin                                                                              | 4.02E-02 | 1.5 | 2.32E-01 | NS  | 8.91E-01 | NS   |
| A_64_P399208  | XM_002728651 |        |            |                                                                                                  | 4.02E-02 | 1.5 | 2.52E-01 | NS  | 1.96E-03 | -1.5 |
| A_44_P499166  | NM_001107312 | 306490 | Mtmr7      | myotubularin related protein 7                                                                   | 2.02E-02 | 1.5 | 9.35E-01 | NS  | 4.18E-01 | NS   |
| A_64_P044146  | NM_017281    | 29671  | Psma4      | proteasome (prosome, macropain) subunit, alpha type 4                                            | 4.75E-02 | 1.5 | 1.62E-01 | NS  | 6.89E-01 | NS   |
| A_64_P150519  | NM_012944    | 25432  | Drd4       | dopamine receptor D4                                                                             | 2.92E-02 | 1.5 | 2.59E-01 | NS  | 2.79E-01 | NS   |
| A_64_P073658  | XM_001064739 | 303016 | RGD1310862 | similar to adult retina protein                                                                  | 3.05E-02 | 1.5 | 1.83E-01 | NS  | 7.99E-03 | -1.5 |
| A_64_P032693  | XM_002724830 | 304382 | RGD1561143 | similar to cell surface receptor FDFACT                                                          | 3.43E-02 | 1.5 | 1.81E-01 | NS  | 1.08E-01 | NS   |
| A_64_P093599  | NM_133411    | 170924 | Abcc4      | ATP-binding cassette, sub-family C (CFTR/MRP), member 4                                          | 4.10E-03 | 1.5 | 3.96E-02 | 1.4 | 1.52E-01 | NS   |
| A_44_P267199  | NM_001173344 | 308478 | Spred3     | sprouty-related, EVH1 domain containing 3                                                        | 4.39E-03 | 1.5 | 4.73E-01 | NS  | 2.11E-01 | NS   |

|              |              |           |              |                                                                                                  |          |     |          |     |          |      |
|--------------|--------------|-----------|--------------|--------------------------------------------------------------------------------------------------|----------|-----|----------|-----|----------|------|
| A_43_P21827  | NM_001007093 | 310616    | Creb3l4      | cAMP responsive element binding protein 3 like 4                                                 | 4.73E-02 | 1.5 | 8.24E-01 | NS  | 4.65E-01 | NS   |
| A_64_P031118 | NM_139263    | 246174    | Fgd4         | FYVE, RhoGEF and PH domain containing 4                                                          | 8.95E-03 | 1.5 | 1.46E-01 | NS  | 1.55E-01 | NS   |
| A_64_P003342 | XM_577381    | 501954    | RGD1562612   | similar to RIKEN cDNA 1110003E01 CCAAT/enhancer binding protein (C/EBP), delta                   | 2.20E-02 | 1.5 | 2.54E-02 | 1.3 | 6.61E-01 | NS   |
| A_42_P762829 | NM_013154    | 25695     | Cebpd        | delta                                                                                            | 3.19E-02 | 1.5 | 8.26E-01 | NS  | 9.69E-02 | NS   |
| A_64_P014756 | NM_001000037 | 287517    | Olr1519      | olfactory receptor 1519                                                                          | 4.45E-02 | 1.5 | 1.86E-02 | 1.3 | 9.86E-02 | NS   |
| A_64_P030347 | NM_001107857 | 312275    | Ephb6        | Eph receptor B6                                                                                  | 3.22E-03 | 1.5 | 3.44E-01 | NS  | 3.43E-01 | NS   |
| A_42_P558703 | NM_001106810 | 300474    | Adamts15     | ADAM metalloproteinase with thrombospondin type 1 motif, 15                                      | 4.82E-02 | 1.5 | 9.26E-01 | NS  | 1.41E-01 | NS   |
| A_64_P063077 | NM_001009503 | 494222    | Pfn4         | profilin family, member 4                                                                        | 2.80E-02 | 1.5 | 8.58E-02 | NS  | 5.16E-02 | NS   |
| A_42_P535152 | XM_001069024 | 684122    | LOC684122    | similar to development and differentiation enhancing factor-like 1                               | 4.69E-02 | 1.5 | 7.72E-01 | NS  | 1.57E-02 | -1.5 |
| A_64_P144513 | XR_086096    | 691781    | LOC691781    | similar to Tubulin alpha-2 chain (Alpha-tubulin 2)                                               | 9.99E-03 | 1.5 | 2.27E-02 | 1.3 | 8.30E-01 | NS   |
| A_64_P158073 | NM_001170602 | 315330    | Espl1        | extra spindle pole bodies homolog 1 (S. cerevisiae)                                              | 2.92E-02 | 1.5 | 6.35E-02 | NS  | 2.48E-01 | NS   |
| A_64_P099240 | XR_006253    |           |              |                                                                                                  | 4.70E-02 | 1.5 | 4.80E-03 | 1.3 | 1.33E-01 | NS   |
| A_44_P262025 | NM_001113570 | 246299    | Gtf3a        | general transcription factor III A                                                               | 3.42E-02 | 1.5 | 6.25E-03 | 1.3 | 2.35E-01 | NS   |
| A_64_P019186 | NM_001107433 | 307868    | Mon1b        | MON1 homolog b (yeast)                                                                           | 1.49E-02 | 1.5 | 5.84E-02 | NS  | 5.56E-03 | -1.7 |
| A_64_P112026 | XM_001079920 |           |              |                                                                                                  | 2.24E-02 | 1.5 | 1.77E-01 | NS  | 8.22E-01 | NS   |
| A_64_P003972 | NM_022270    | 64037     | Slc22a4      | solute carrier family 22 (organic cation transporter), member 4                                  | 4.89E-03 | 1.5 | 2.64E-01 | NS  | 7.71E-01 | NS   |
| A_43_P12023  | NM_019328    | 54278     | Nr4a2        | nuclear receptor subfamily 4, group A, member 2                                                  | 4.41E-02 | 1.5 | 6.15E-01 | NS  | 2.30E-02 | -1.8 |
| A_44_P529833 | NM_001107666 | 310314    | Ttc14        | tetratricopeptide repeat domain 14                                                               | 4.23E-02 | 1.5 | 8.74E-02 | NS  | 1.00E-02 | -1.6 |
| A_44_P445484 | XM_002728168 | 100359425 | LOC100359425 | CG13585-like                                                                                     | 1.48E-02 | 1.5 | 2.87E-02 | 1.4 | 9.63E-01 | NS   |
| A_64_P098892 | NM_001109065 | 498179    | RGD1563482   | similar to hypothetical protein FLJ38663                                                         | 2.87E-02 | 1.5 | 6.92E-02 | NS  | 9.42E-01 | NS   |
| A_64_P158053 | NM_001109487 | 685936    | Pfn3         | profilin 3                                                                                       | 2.37E-03 | 1.5 | 9.41E-01 | NS  | 6.41E-01 | NS   |
| A_64_P075175 | XM_002728984 | 499453    | RGD1565550   | similar to double homeobox, 4                                                                    | 4.84E-02 | 1.5 | 1.92E-01 | NS  | 1.47E-01 | NS   |
| A_43_P17945  | NM_001014006 | 306761    | F12          | coagulation factor XII (Hageman factor)                                                          | 1.67E-02 | 1.5 | 1.96E-01 | NS  | 4.41E-01 | NS   |
| A_42_P804469 | NM_001107816 | 311795    | RGD1308019   | similar to hypothetical protein FLJ20245                                                         | 3.00E-02 | 1.5 | 2.45E-01 | NS  | 2.57E-01 | NS   |
| A_43_P15154  | NM_053384    | 84399     | lhh          | Indian hedgehog                                                                                  | 1.06E-02 | 1.5 | 3.80E-02 | 1.3 | 5.43E-01 | NS   |
| A_44_P265709 | NM_013195    | 25746     | Il2rb        | interleukin 2 receptor, beta                                                                     | 8.80E-03 | 1.5 | 2.56E-02 | 1.5 | 2.54E-01 | NS   |
| A_64_P018582 | XM_226016    | 307498    | Pura         | purine rich element binding protein A                                                            | 3.20E-02 | 1.5 | 5.27E-01 | NS  | 2.48E-02 | -1.4 |
| A_64_P025998 | NM_001107814 | 311783    | Il1f5        | interleukin 1 family, member 5 (delta)                                                           | 3.36E-02 | 1.5 | 7.75E-01 | NS  | 6.09E-01 | NS   |
| A_64_P086433 | NM_001005906 | 316533    | Chpf         | chondroitin polymerizing factor                                                                  | 1.26E-02 | 1.5 | 1.15E-01 | NS  | 5.72E-02 | NS   |
| A_64_P067320 | NM_001033706 | 361571    | Aldh16a1     | aldehyde dehydrogenase 16 family, member A1                                                      | 1.39E-02 | 1.5 | 2.15E-01 | NS  | 4.71E-01 | NS   |
| A_64_P030630 | NM_001109610 | 690795    | H2afj        | H2A histone family, member J                                                                     | 4.04E-02 | 1.5 | 3.49E-02 | 1.4 | 8.13E-01 | NS   |
| A_64_P133370 | NM_175765    | 313323    | Psp1         | PC4 and SFRS1 interacting protein 1                                                              | 1.85E-02 | 1.5 | 1.84E-01 | NS  | 2.56E-01 | NS   |
| A_42_P550702 | NM_001107574 | 309177    | Znhit2       | zinc finger, HIT type 2                                                                          | 4.54E-02 | 1.5 | 4.53E-02 | 1.2 | 2.64E-01 | NS   |
| A_64_P114610 | XM_001060106 | 682147    | LOC682147    | similar to CG7194-PA                                                                             | 2.06E-02 | 1.5 | 4.01E-01 | NS  | 9.72E-01 | NS   |
| A_43_P14727  | NM_001106496 | 296050    | RGD1305045   | similar to hypothetical protein transducin-like enhancer of split 1 (E(sp1) homolog, Drosophila) | 4.03E-02 | 1.5 | 4.38E-01 | NS  | 2.24E-01 | NS   |
| A_44_P246114 | NM_001173433 | 362533    | Tie1         | homolog, Drosophila)                                                                             | 3.55E-02 | 1.5 | 6.32E-01 | NS  | 2.89E-01 | NS   |
| A_42_P649672 | NM_057210    | 117559    | Sv2a         | synaptic vesicle glycoprotein 2a                                                                 | 4.22E-02 | 1.5 | 7.84E-01 | NS  | 4.81E-01 | NS   |
| A_64_P123798 | XM_001063101 | 681193    | LOC681193    | similar to DNA-directed RNA polymerase II 7.6 kDa polypeptide (RPB10) (RPB7.6) (RPABC5)          | 4.04E-02 | 1.5 | 1.11E-01 | NS  | 1.13E-01 | NS   |
| A_44_P181548 | NM_053926    | 116723    | Pip4k2a      | phosphatidylinositol-5-phosphate 4-kinase, type II, alpha                                        | 2.57E-02 | 1.5 | 7.23E-02 | NS  | 8.25E-01 | NS   |
| A_44_P272186 | NM_001107950 | 313433    | RGD1564541   | similar to hypothetical protein FLJ22965                                                         | 1.44E-02 | 1.5 | 5.22E-01 | NS  | 1.01E-02 | -1.8 |
| A_44_P995874 | XM_002725789 | 100364597 | LOC100364597 | 5'-nucleotidase, cytosolic II-like                                                               | 2.41E-02 | 1.5 | 1.79E-01 | NS  | 4.38E-01 | NS   |
| A_64_P036509 | NM_012527    | 24260     | Chrm3        | cholinergic receptor, muscarinic 3                                                               | 4.78E-02 | 1.5 | 9.13E-01 | NS  | 6.07E-03 | -1.6 |
| A_44_P219699 | NM_001000615 | 404804    | Olr749       | olfactory receptor 749                                                                           | 1.17E-02 | 1.5 | 4.44E-01 | NS  | 1.23E-01 | NS   |
| A_44_P187056 | XM_002729169 | 114517    | Itga6        | integrin, alpha 6                                                                                | 3.62E-02 | 1.5 | 8.18E-01 | NS  | 2.34E-03 | -2.3 |
| A_44_P478114 | NM_001107273 | 305984    | Cdca2        | cell division cycle associated 2                                                                 | 2.86E-02 | 1.5 | 3.92E-02 | 1.5 | 1.20E-01 | NS   |

|              |              |        |            |                                                                                            |          |     |          |     |          |      |
|--------------|--------------|--------|------------|--------------------------------------------------------------------------------------------|----------|-----|----------|-----|----------|------|
| A_64_P133286 | NM_001017386 | 361757 | Opalin     | oligodendrocytic myelin paranodal and inner loop protein                                   | 4.72E-02 | 1.5 | 4.11E-01 | NS  | 8.79E-02 | NS   |
| A_44_P479359 | NM_031063    | 81727  | Mvk        | mevalonate kinase                                                                          | 2.82E-02 | 1.5 | 2.49E-02 | 1.3 | 3.28E-01 | NS   |
| A_64_P104800 | XM_001062397 | 684903 | LOC684903  | similar to Probable ATP-dependent RNA helicase DHX34 (DEAH box protein 34)                 | 3.98E-02 | 1.5 | 3.30E-01 | NS  | 5.07E-02 | NS   |
| A_42_P687443 | NM_020100    | 56820  | Ramp3      | receptor (G protein-coupled) activity modifying protein 3                                  | 3.17E-02 | 1.5 | 4.15E-02 | 1.2 | 7.25E-01 | NS   |
| A_42_P496411 | NM_001109410 | 680465 | Trappc6a   | trafficking protein particle complex 6A DnaJ (Hsp40) homolog, subfamily C, member 17       | 3.67E-02 | 1.5 | 2.11E-01 | NS  | 6.25E-03 | -1.9 |
| A_64_P110048 | XM_001080801 | 311329 | Dnajc17    | member 17                                                                                  | 1.77E-02 | 1.5 | 9.37E-01 | NS  | 5.55E-01 | NS   |
| A_64_P157244 | NM_001013072 | 294011 | Sfxn2      | sideroflexin 2                                                                             | 3.98E-02 | 1.5 | 3.77E-01 | NS  | 1.70E-01 | NS   |
| A_44_P487249 | NM_031051    | 81683  | Mif        | macrophage migration inhibitory factor                                                     | 3.09E-02 | 1.5 | 3.73E-02 | 1.2 | 3.93E-02 | -1.5 |
| A_64_P148180 | XM_001074464 |        |            |                                                                                            | 8.32E-03 | 1.5 | 6.07E-03 | 1.2 | 1.24E-01 | NS   |
| A_64_P007371 | XM_001080416 | 687869 | LOC687869  | similar to olfactory receptor 389                                                          | 3.54E-02 | 1.5 | 7.18E-02 | NS  | 1.25E-01 | NS   |
| A_64_P054496 | NM_001127599 | 292811 | Ccdc123    | coiled-coil domain containing 123                                                          | 4.05E-02 | 1.5 | 2.65E-03 | 1.2 | 7.30E-01 | NS   |
| A_64_P122423 | XR_085670    |        |            |                                                                                            | 2.71E-02 | 1.5 | 2.93E-01 | NS  | 9.31E-02 | NS   |
| A_64_P033214 | XM_346406    | 360243 | Top2a      | topoisomerase (DNA) II alpha                                                               | 3.63E-02 | 1.5 | 1.16E-03 | 1.5 | 5.12E-01 | NS   |
| A_64_P069066 | NM_031680    | 63843  | P2ry4      | pyrimidinergic receptor P2Y, G-protein coupled, 4                                          | 2.73E-02 | 1.5 | 6.48E-01 | NS  | 2.76E-01 | NS   |
| A_64_P016828 | NM_053986    | 117057 | Myo1b      | myosin Ib                                                                                  | 2.67E-02 | 1.5 | 4.76E-01 | NS  | 9.01E-01 | NS   |
| A_64_P070656 | XR_006986    | 361414 | LOC361414  | similar to Synaptic vesicle membrane protein VAT-1 homolog                                 | 2.77E-02 | 1.5 | 7.86E-01 | NS  | 4.56E-02 | -1.4 |
| A_43_P16725  | NM_001009638 | 291784 | RGD1311805 | similar to RIKEN cDNA 2400010D15 synuclein, gamma (breast cancer-specific protein 1)       | 1.51E-02 | 1.5 | 1.10E-02 | 1.3 | 9.00E-01 | NS   |
| A_44_P384017 | NM_031688    | 64347  | Sncg       | similar to Ankyrin-2 (Brain ankyrin) (Ankyrin B) (Ankyrin, nonerythroid)                   | 4.82E-02 | 1.5 | 7.26E-01 | NS  | 9.66E-01 | NS   |
| A_64_P087094 | NM_001109427 | 680734 | LOC680734  |                                                                                            | 1.42E-02 | 1.5 | 8.98E-01 | NS  | 8.30E-01 | NS   |
| A_44_P112082 | NM_001134833 | 293107 | Ccdc89     | coiled-coil domain containing 89                                                           | 1.29E-02 | 1.5 | 1.83E-01 | NS  | 2.26E-02 | -1.7 |
| A_64_P056638 | NM_001108308 | 360667 | RGD1307394 | similar to hypothetical protein ET                                                         | 1.09E-02 | 1.5 | 4.97E-01 | NS  | 9.91E-01 | NS   |
| A_44_P503240 | NM_178333    | 302538 | Syt5       | synaptotagmin-like 5                                                                       | 2.87E-02 | 1.5 | 6.64E-02 | NS  | 8.91E-02 | NS   |
| A_64_P086519 | NM_001106236 | 292737 | Blvrb      | biliverdin reductase B (flavin reductase (NADPH))                                          | 4.66E-02 | 1.5 | 1.43E-01 | NS  | 8.84E-03 | -1.4 |
| A_64_P039342 | NM_001004242 | 300115 | Arhgap8    | Rho GTPase activating protein 8                                                            | 2.70E-02 | 1.5 | 2.96E-02 | 1.2 | 1.07E-01 | NS   |
| A_64_P075406 | XM_001062061 | 287170 | Snmp25     | small nuclear ribonucleoprotein 25 (U11/U12) family with sequence similarity 71, member F1 | 3.75E-02 | 1.5 | 2.40E-01 | NS  | 4.73E-01 | NS   |
| A_64_P071411 | NM_001024324 | 500061 | Fam71f1    |                                                                                            | 6.98E-04 | 1.5 | 2.70E-01 | NS  | 6.54E-01 | NS   |
| A_64_P009460 | NM_133302    | 117088 | Adarb2     | adenosine deaminase, RNA-specific, B2                                                      | 4.84E-03 | 1.5 | 8.33E-01 | NS  | 7.90E-01 | NS   |
| A_64_P048315 | XM_344527    |        |            |                                                                                            | 3.47E-02 | 1.5 | 9.91E-01 | NS  | 7.00E-01 | NS   |
| A_64_P293317 | XM_002729146 | 114089 | Sec16a     | SEC16 homolog A (S. cerevisiae) signal transducer and activator of transcription 2         | 3.86E-02 | 1.5 | 3.34E-02 | 1.2 | 7.93E-01 | NS   |
| A_64_P092005 | NM_001011905 | 288774 | Stat2      | transcription 2                                                                            | 2.97E-02 | 1.5 | 4.32E-01 | NS  | 1.38E-01 | NS   |
| A_64_P052441 | NM_001100630 | 360589 | Ints2      | integrator complex subunit 2                                                               | 4.74E-03 | 1.5 | 1.60E-02 | 1.3 | 7.86E-01 | NS   |
| A_42_P627572 | NM_001166275 | 309595 | Mdc1       | mediator of DNA damage checkpoint 1 polymerase (DNA directed), epsilon 2 (p59 subunit)     | 6.39E-03 | 1.5 | 1.33E-01 | NS  | 1.47E-01 | NS   |
| A_44_P236738 | NM_001169108 | 299112 | Pole2      |                                                                                            | 4.89E-02 | 1.5 | 3.81E-01 | NS  | 5.57E-02 | NS   |
| A_42_P582004 | NM_001113780 | 313021 | Tmem222    | transmembrane protein 222                                                                  | 2.22E-02 | 1.5 | 6.92E-03 | 1.2 | 1.15E-01 | NS   |
| A_64_P091852 | XR_007272    | 497848 | LOC497848  | hypothetical LOC497848                                                                     | 1.78E-02 | 1.5 | 2.30E-03 | 1.3 | 2.54E-01 | NS   |
| A_64_P086719 | XM_001071882 |        |            |                                                                                            | 2.79E-02 | 1.5 | 3.22E-01 | NS  | 5.24E-02 | NS   |
| A_64_P009355 | NM_001025279 | 306014 | Reep4      | receptor accessory protein 4                                                               | 1.20E-02 | 1.5 | 1.06E-01 | NS  | 4.17E-01 | NS   |
| A_64_P074127 | XM_002727194 |        |            |                                                                                            | 8.78E-03 | 1.5 | 2.19E-02 | 1.4 | 8.86E-01 | NS   |
| A_64_P051367 | NM_001145062 | 688536 | Glyat3     | glycine-N-acyltransferase-like 3                                                           | 3.86E-02 | 1.5 | 2.02E-01 | NS  | 1.97E-02 | -1.8 |
| A_64_P126458 | NM_001008282 | 287835 | Galk1      | galactokinase 1                                                                            | 2.41E-02 | 1.5 | 5.50E-02 | NS  | 1.76E-01 | NS   |
| A_64_P109457 | NM_001085369 | 171529 | Kif2c      | kinesin family member 2C                                                                   | 8.46E-03 | 1.5 | 2.86E-01 | NS  | 2.48E-02 | 2.7  |
| A_64_P038852 | NM_001106375 | 294103 | Papss2     | 3'-phosphoadenosine 5'-phosphosulfate synthase 2                                           | 3.10E-02 | 1.5 | 1.47E-01 | NS  | 4.13E-01 | NS   |
| A_64_P056678 | NM_001109506 | 688581 | Elmod2     | ELMO/CED-12 domain containing 2 protein kinase, membrane associated                        | 2.83E-02 | 1.5 | 9.69E-01 | NS  | 2.19E-02 | -1.6 |
| A_44_P520859 | NM_001105766 | 287101 | Pkmyt1     | tyrosine/threonine 1                                                                       | 2.70E-03 | 1.5 | 1.97E-01 | NS  | 7.43E-01 | NS   |



|               |              |           |            |                                                                                                      |          |     |          |      |          |      |
|---------------|--------------|-----------|------------|------------------------------------------------------------------------------------------------------|----------|-----|----------|------|----------|------|
| A_64_P017053  | XM_002724507 | 117251    | Dnah9      | dynein, axonemal, heavy polypeptide 9                                                                | 3.30E-02 | 1.5 | 6.89E-01 | NS   | 6.12E-01 | NS   |
| A_44_P386901  | NM_224454    |           |            |                                                                                                      | 4.51E-02 | 1.6 | 1.99E-01 | NS   | 1.59E-01 | NS   |
| A_64_P014085  | NM_001007678 | 304807    | Rabif      | RAB interacting factor                                                                               | 3.54E-02 | 1.6 | 3.66E-01 | NS   | 1.89E-01 | NS   |
| A_64_P024459  | XM_002726986 |           |            |                                                                                                      | 2.24E-02 | 1.6 | 3.84E-01 | NS   | 7.13E-01 | NS   |
| A_42_P729711  | NM_001108344 | 360847    | Ube2t      | ubiquitin-conjugating enzyme E2T (putative)                                                          | 4.36E-02 | 1.6 | 4.03E-02 | 1.3  | 3.64E-01 | NS   |
| A_44_P187080  | NM_001110823 | 29693     | Atp2a2     | ATPase, Ca++ transporting, cardiac muscle, slow twitch 2                                             | 3.58E-02 | 1.6 | 1.05E-01 | NS   | 2.27E-01 | NS   |
| A_64_P025476  | NM_133297    | 113922    | 15-Sep     | selenoprotein                                                                                        | 2.83E-02 | 1.6 | 2.03E-01 | NS   | 2.01E-01 | NS   |
| A_64_P024664  | XM_001066357 |           |            |                                                                                                      | 4.22E-02 | 1.6 | 1.84E-01 | NS   | 5.68E-02 | NS   |
| A_64_P088814  | NM_022297    | 64157     | Ddah1      | dimethylarginine dimethylaminohydrolase 1                                                            | 1.50E-03 | 1.6 | 1.11E-01 | NS   | 1.31E-01 | NS   |
| A_64_P077422  | XM_001074160 | 690343    | LOC690343  | similar to zinc finger protein 420                                                                   | 4.37E-02 | 1.6 | 4.24E-01 | NS   | 3.09E-01 | NS   |
| A_43_P11967   | NM_019190    | 29333     | Cd46       | CD46 molecule, complement regulatory protein                                                         | 1.00E-02 | 1.6 | 4.84E-02 | 1.4  | 8.26E-01 | NS   |
| A_64_P068152  | NM_001109002 | 367100    | Smad6      | SMAD family member 6                                                                                 | 3.95E-02 | 1.6 | 1.26E-01 | NS   | 5.79E-02 | NS   |
| A_44_P105310  | NM_001109118 | 498728    | Elovl2     | elongation of very long chain fatty acids (FEN1/Elo2, SUR4/Elo3, yeast)-like 2                       | 8.01E-03 | 1.6 | 4.54E-01 | NS   | 2.09E-01 | NS   |
| A_64_P131199  | NM_001109467 | 685462    | Emid1      | EMI domain containing 1                                                                              | 4.05E-02 | 1.6 | 2.64E-01 | NS   | 6.95E-02 | NS   |
| A_64_P067233  | AY325245     | 307759    | Gpt2       | glutamic pyruvate transaminase (alanine aminotransferase) 2                                          | 4.42E-02 | 1.6 | 6.75E-01 | NS   | 4.51E-01 | NS   |
| A_64_P162140  | NM_001044295 | 689256    | Tpd521     | tumor protein D52-like 1                                                                             | 2.34E-02 | 1.6 | 1.75E-01 | NS   | 1.79E-01 | NS   |
| A_44_P997940  | NM_001135006 | 100189544 | Nrn1       | neuritin 1-like                                                                                      | 3.25E-02 | 1.6 | 4.44E-01 | NS   | 8.96E-01 | NS   |
| A_64_P095830  | NM_152242    | 260326    | Gpr56      | G protein-coupled receptor 56                                                                        | 2.20E-02 | 1.6 | 9.00E-03 | 1.3  | 6.86E-02 | NS   |
| A_64_P006177  | NM_001134971 | 360955    | Man2b2     | mannosidase, alpha, class 2B, member 2                                                               | 2.60E-02 | 1.6 | 4.34E-01 | NS   | 2.31E-02 | -2.2 |
| A_44_P418944  | NM_199394    | 314312    | Entpd5     | diphosphohydrolase 5                                                                                 | 4.10E-02 | 1.6 | 4.37E-01 | NS   | 2.82E-01 | NS   |
| A_64_P117413  | NM_001107436 | 307907    | RGD1304884 | similar to RIKEN cDNA 6430548M08                                                                     | 1.54E-03 | 1.6 | 8.48E-01 | NS   | 3.10E-01 | NS   |
| A_64_P100559  | XM_001078017 | 293498    | RGD1306636 | hypothetical LOC293498                                                                               | 2.71E-02 | 1.6 | 5.86E-01 | NS   | 8.94E-02 | NS   |
| A_44_P205528  | NM_145786    | 252958    | liig9      | LIIG9 protein                                                                                        | 2.65E-03 | 1.6 | 8.75E-02 | NS   | 2.18E-01 | NS   |
| A_44_P469040  | NM_001173336 | 300120    | Fam118a    | family with sequence similarity 118, member A                                                        | 2.29E-02 | 1.6 | 3.83E-01 | NS   | 3.37E-01 | NS   |
| A_44_P258855  | NM_053431    | 84491     | Qsox1      | quiescin Q6 sulfhydryl oxidase 1                                                                     | 1.44E-02 | 1.6 | 3.58E-01 | NS   | 2.42E-02 | -1.4 |
| A_44_P1045652 | XM_001057185 |           |            |                                                                                                      | 1.85E-02 | 1.6 | 5.70E-01 | NS   | 9.54E-02 | NS   |
| A_44_P433614  | NM_001011940 | 293735    | Best1      | bestrophin 1                                                                                         | 3.87E-02 | 1.6 | 5.39E-01 | NS   | 5.56E-01 | NS   |
| A_64_P170600  | NM_012577    | 24426     | Gstp1      | glutathione S-transferase pi 1                                                                       | 2.21E-02 | 1.6 | 8.49E-03 | 1.3  | 4.89E-01 | NS   |
| A_64_P037465  | NM_001108336 | 360816    | Sdsl       | serine dehydratase-like                                                                              | 1.79E-02 | 1.6 | 1.69E-01 | NS   | 4.40E-02 | -1.3 |
| A_64_P048359  | XM_001063568 | 682889    | LOC682889  | similar to CG8486-PA, isoform A                                                                      | 4.43E-02 | 1.6 | 2.48E-01 | NS   | 7.75E-02 | NS   |
| A_64_P079225  | NM_001014050 | 311535    | Fam110a    | family with sequence similarity 110, member A                                                        | 1.46E-02 | 1.6 | 5.77E-02 | NS   | 5.30E-01 | NS   |
| A_64_P148136  | NM_001166352 | 362774    | Serpina11  | serine (or cysteine) peptidase inhibitor, clade A (alpha-1 antiproteinasase, antitrypsin), member 11 | 3.90E-02 | 1.6 | 7.51E-01 | NS   | 7.18E-01 | NS   |
| A_44_P1007110 | XM_001080929 | 499157    | RGD1565432 | similar to hypothetical protein                                                                      | 4.87E-02 | 1.6 | 3.03E-01 | NS   | 7.75E-03 | -1.4 |
| A_64_P068498  | XR_008012    |           |            |                                                                                                      | 3.42E-02 | 1.6 | 2.70E-01 | NS   | 3.22E-01 | NS   |
| A_64_P146702  | XM_001056235 | 307486    | Pcdhb22    | protocadherin beta 22                                                                                | 3.27E-02 | 1.6 | 2.53E-03 | -1.4 | 3.22E-01 | NS   |
| A_64_P071664  | NM_017067    | 24942     | Chm        | choroideremia (Rab escort protein 1)                                                                 | 4.71E-02 | 1.6 | 8.52E-01 | NS   | 2.22E-01 | NS   |
| A_44_P153901  | NM_001000065 | 288829    | Olr1061    | olfactory receptor 1061                                                                              | 2.52E-02 | 1.6 | 8.74E-02 | NS   | 2.13E-01 | NS   |
| A_43_P13043   | NM_057137    | 117278    | Ebp        | emopamil binding protein (sterol isomerase)                                                          | 4.49E-02 | 1.6 | 1.47E-01 | NS   | 1.47E-01 | NS   |
| A_44_P123994  | NM_001033666 | 502674    | Dstn       | destrin                                                                                              | 2.53E-02 | 1.6 | 9.46E-02 | NS   | 7.37E-03 | -2.0 |
| A_64_P052765  | NM_001012055 | 307614    | Cdh16      | cadherin 16                                                                                          | 4.45E-02 | 1.6 | 3.76E-01 | NS   | 2.38E-01 | NS   |
| A_64_P035584  | NM_001109901 | 362262    | Emilin3    | elastin microfibril interfacier 3                                                                    | 2.29E-02 | 1.6 | 4.36E-01 | NS   | 3.03E-01 | NS   |
| A_64_P143307  | NM_001014106 | 499328    | Rfk        | riboflavin kinase                                                                                    | 3.43E-02 | 1.6 | 2.88E-01 | NS   | 2.40E-03 | -1.7 |
| A_44_P394737  | NM_001008809 | 406227    | Krt72      | keratin 72                                                                                           | 2.28E-02 | 1.6 | 8.04E-01 | NS   | 6.42E-01 | NS   |
| A_64_P124641  | XR_005580    |           |            |                                                                                                      | 4.47E-02 | 1.6 | 9.01E-02 | NS   | 9.66E-02 | NS   |
| A_44_P1042473 | NM_139096    | 245955    | Lgals3bp   | lectin, galactoside-binding, soluble, 3                                                              | 1.95E-02 | 1.6 | 8.61E-01 | NS   | 4.19E-02 | -2.6 |
| A_64_P044682  | NM_033443    | 25227     | Arsb       | arylsulfatase B                                                                                      | 3.62E-02 | 1.6 | 9.54E-01 | NS   | 5.01E-02 | NS   |

|               |              |        |            |                                                                                            |          |     |          |     |          |      |
|---------------|--------------|--------|------------|--------------------------------------------------------------------------------------------|----------|-----|----------|-----|----------|------|
| A_64_P136857  | XM_001078537 | 691495 | LOC691495  | hypothetical protein LOC691495 capping protein (actin filament) muscle Z-line, alpha 1     | 1.85E-02 | 1.6 | 1.73E-01 | NS  | 5.86E-02 | NS   |
| A_64_P180747  | NM_001109625 | 691149 | Capza1     | IQ motif and Sec7 domain 3                                                                 | 1.62E-02 | 1.6 | 8.63E-01 | NS  | 2.87E-01 | NS   |
| A_64_P037666  | NM_207617    | 404781 | lqsec3     | similar to cathepsin O                                                                     | 1.57E-02 | 1.6 | 2.97E-01 | NS  | 1.73E-02 | -3.4 |
| A_64_P029394  | XM_001070844 | 684529 | LOC684529  | growth differentiation factor 15                                                           | 9.81E-03 | 1.6 | 2.06E-02 | 1.5 | 6.31E-01 | NS   |
| A_64_P011489  | NM_019216    | 29455  | Gdf15      | similar to RIKEN cDNA 1110031I02                                                           | 4.07E-02 | 1.6 | 5.97E-01 | NS  | 4.01E-01 | NS   |
| A_44_P1027244 | NM_001013976 | 303749 | RGD1305007 | aquaporin 6, kidney specific                                                               | 4.65E-02 | 1.6 | 1.40E-01 | NS  | 4.22E-02 | -1.6 |
| A_64_P122362  | NM_022181    | 29170  | Aqp6       |                                                                                            | 2.90E-02 | 1.6 | 8.89E-01 | NS  | 1.29E-01 | NS   |
| A_64_P067331  | XM_344065    |        |            | SH3-domain binding protein 5 (BTK-associated)                                              | 2.25E-02 | 1.6 | 4.97E-02 | 1.2 | 5.41E-01 | NS   |
| A_44_P423662  | NM_054011    | 117186 | Sh3bp5     | pannexin 2                                                                                 | 1.27E-02 | 1.6 | 9.77E-01 | NS  | 3.99E-01 | NS   |
| A_44_P179787  | NM_199409    | 362979 | Panx2      | basigin                                                                                    | 7.02E-03 | 1.6 | 6.61E-02 | NS  | 1.33E-01 | NS   |
| A_64_P013284  | NM_001109882 | 25246  | Bsg        | melanoma associated antigen (mutated) 1-like 1                                             | 3.65E-02 | 1.6 | 2.73E-01 | NS  | 2.65E-01 | NS   |
| A_64_P163075  | NM_001109321 | 501630 | Mum11      | methyltransferase like 2                                                                   | 3.12E-02 | 1.6 | 9.20E-01 | NS  | 1.58E-01 | NS   |
| A_64_P028270  | NM_001108839 | 363687 | Mettl2     | similar to isopentenyl-diphosphate delta isomerase 2                                       | 4.27E-03 | 1.6 | 1.82E-01 | NS  | 5.52E-02 | NS   |
| A_64_P146051  | XM_001072335 | 689872 | LOC689872  | olfactory receptor 82                                                                      | 4.62E-02 | 1.6 | 4.34E-01 | NS  | 3.24E-02 | -1.5 |
| A_44_P381764  | NM_001001282 | 365328 | Olr82      | similar to Macrophage migration inhibitory factor (MIF) (Delayed early response protein 6) | 2.67E-02 | 1.6 | 7.63E-01 | NS  | 5.62E-01 | NS   |
| A_64_P026098  | XM_575674    |        |            | toll-like receptor 12                                                                      | 4.09E-02 | 1.6 | 6.99E-01 | NS  | 3.89E-02 | -1.3 |
| A_64_P025329  | XM_001080942 | 366675 | RGD1559921 | hypothetical LOC302495                                                                     | 1.46E-02 | 1.6 | 2.71E-02 | 1.2 | 2.51E-02 | -1.5 |
| A_64_P035564  | NM_001108682 | 362604 | Tlr12      | ras homolog gene family, member B                                                          | 2.91E-02 | 1.6 | 2.07E-02 | 1.8 | 5.54E-01 | NS   |
| A_64_P037638  | XM_001077660 |        |            | neuropeptide B                                                                             | 4.54E-02 | 1.6 | 8.50E-01 | NS  | 7.25E-02 | NS   |
| A_64_P062023  | NM_001106950 | 302495 | LOC302495  | ferritin, heavy polypeptide 1                                                              | 1.66E-02 | 1.6 | 4.55E-01 | NS  | 4.90E-01 | NS   |
| A_64_P141727  | NM_022542    | 64373  | Rhob       | neuropeptide W                                                                             | 2.09E-02 | 1.6 | 8.73E-01 | NS  | 3.17E-01 | NS   |
| A_44_P454227  | NM_153293    | 259222 | Npb        | interleukin 13 receptor, alpha 1                                                           | 4.20E-02 | 1.6 | 7.57E-01 | NS  | 4.77E-02 | -1.6 |
| A_43_P13974   | NM_012848    | 25319  | Fth1       | thyroid peroxidase                                                                         | 9.82E-03 | 1.6 | 1.25E-01 | NS  | 1.51E-01 | NS   |
| A_64_P050084  | NM_153294    | 259224 | Npw        | leukocyte immunoglobulin-like receptor, subfamily A (with TM domain), member 5             | 4.68E-02 | 1.6 | 8.32E-01 | NS  | 3.72E-01 | NS   |
| A_44_P389072  | NM_145789    | 252963 | Il13ra1    | testis derived transcript                                                                  | 1.07E-02 | 1.6 | 3.46E-01 | NS  | 2.59E-02 | -1.5 |
| A_64_P045019  | XR_086270    |        |            | ankyrin repeat domain 55                                                                   | 4.94E-02 | 1.6 | 1.09E-01 | NS  | 2.61E-02 | -1.6 |
| A_64_P155756  | NM_019353    | 54314  | Tpo        | heat shock 105kDa/110kDa protein 1 CDC45 cell division cycle 45-like (S. cerevisiae)       | 2.59E-02 | 1.6 | 7.00E-02 | NS  | 1.74E-01 | NS   |
| A_64_P145571  | NM_001076793 | 691533 | Lilra5     | melanoma antigen, family H, 1                                                              | 3.15E-02 | 1.6 | 3.09E-01 | NS  | 4.61E-01 | NS   |
| A_64_P058923  | NM_001039344 | 500040 | Tes        | fermitin family homolog 1 (Drosophila)                                                     | 3.52E-02 | 1.6 | 1.87E-01 | NS  | 3.42E-02 | -1.7 |
| A_43_P17467   | XM_342195    | 361898 | Ankrd55    | similar to ribosomal protein L35a                                                          | 2.63E-02 | 1.6 | 2.62E-02 | 1.7 | 7.73E-01 | NS   |
| A_44_P121374  | NM_001011901 | 288444 | Hsph1      | lipid phosphate phosphatase-related protein type 4                                         | 3.66E-02 | 1.6 | 4.73E-04 | 1.7 | 4.66E-01 | NS   |
| A_44_P1030098 | NM_001105866 | 287961 | Cdc45l     | family with sequence similarity 184, member A                                              | 2.17E-02 | 1.6 | 3.58E-02 | 1.3 | 2.54E-01 | NS   |
| A_44_P436336  | NM_001013250 | 367767 | Mageh1     | calpain 1                                                                                  | 8.46E-03 | 1.6 | 1.24E-02 | 1.3 | 2.04E-01 | NS   |
| A_64_P096871  | NM_001106515 | 296179 | Fermt1     | transmembrane emp24 protein transport domain containing 9                                  | 4.15E-02 | 1.6 | 2.81E-01 | NS  | 3.75E-01 | NS   |
| A_64_P113982  | XM_001072004 | 689786 | LOC689786  | carbohydrate (chondroitin 4) sulfotransferase 11                                           | 2.40E-03 | 1.6 | 7.29E-01 | NS  | 5.60E-02 | NS   |
| A_64_P017083  | NM_001001508 | 295401 | Lppr4      | zinc finger, AN1-type domain 2A                                                            | 3.06E-02 | 1.6 | 7.49E-01 | NS  | 2.34E-01 | NS   |
| A_64_P015183  | AF235993     |        |            | defensin alpha 10                                                                          | 2.16E-02 | 1.6 | 2.85E-01 | NS  | 4.55E-01 | NS   |
| A_64_P149764  | XR_086152    | 361853 | Fam184a    | lin-7 homolog C (C. elegans)                                                               | 3.44E-02 | 1.6 | 5.30E-01 | NS  | 4.10E-01 | NS   |
| A_64_P166406  | NM_019152    | 29153  | Capn1      |                                                                                            | 4.00E-02 | 1.6 | 1.13E-01 | NS  | 1.93E-02 | -1.8 |
| A_44_P316504  | NM_001009703 | 361207 | Tmed9      |                                                                                            | 1.61E-02 | 1.6 | 8.78E-02 | NS  | 1.93E-01 | NS   |
| A_64_P031781  | XM_001057861 |        |            |                                                                                            | 1.37E-02 | 1.6 | 1.98E-02 | 1.3 | 7.85E-03 | -1.6 |
| A_64_P128209  | NM_001108079 | 314694 | Chst11     |                                                                                            | 3.27E-02 | 1.6 | 4.80E-01 | NS  | 3.49E-02 | -2.3 |
| A_42_P457692  | NM_001008363 | 360772 | Zfand2a    |                                                                                            | 4.40E-02 | 1.6 | 5.18E-02 | NS  | 7.85E-01 | NS   |
| A_64_P125531  | NM_001033074 | 613221 | Defa10     |                                                                                            | 4.09E-02 | 1.6 | 8.02E-01 | NS  | 6.98E-01 | NS   |
| A_64_P033322  | NM_021851    | 60442  | Lin7c      |                                                                                            | 2.31E-02 | 1.6 | 1.43E-01 | NS  | 3.84E-02 | -1.3 |
| A_64_P086529  | XM_001071683 |        |            |                                                                                            | 3.52E-02 | 1.6 | 1.05E-01 | NS  | 6.34E-01 | NS   |

|              |              |           |              |                                                                                                                                  |          |     |          |      |          |      |
|--------------|--------------|-----------|--------------|----------------------------------------------------------------------------------------------------------------------------------|----------|-----|----------|------|----------|------|
| A_64_P115200 | AY325138     | 502374    | Polr2l       | polymerase (RNA) II (DNA directed)                                                                                               | 3.05E-02 | 1.6 | 5.44E-01 | NS   | 5.32E-01 | NS   |
| A_64_P035962 | XM_001061186 | 682360    | LOC682360    | polypeptide L<br>hypothetical protein LOC682360                                                                                  | 1.66E-02 | 1.6 | 5.28E-01 | NS   | 2.94E-02 | -3.4 |
| A_64_P013398 | NM_053765    | 114711    | Gne          | epimerase/N-acetylmannosamine kinase                                                                                             | 2.68E-02 | 1.6 | 4.56E-03 | 1.2  | 5.59E-02 | NS   |
| A_64_P012232 | NM_017136    | 29230     | Sqle         | squalene epoxidase                                                                                                               | 3.44E-02 | 1.6 | 4.07E-03 | 1.4  | 1.71E-01 | NS   |
| A_64_P127966 | NM_001127639 | 684536    | Gba          | glucosidase, beta, acid                                                                                                          | 3.66E-02 | 1.6 | 9.27E-02 | NS   | 1.22E-01 | NS   |
| A_42_P492882 | NM_001106857 | 301009    | Nckipsd      | NCK interacting protein with SH3 domain                                                                                          | 2.72E-02 | 1.6 | 7.63E-02 | NS   | 1.10E-02 | -1.7 |
| A_44_P899127 | NM_001024334 | 500300    | LOC500300    | similar to hypothetical protein MGC6835                                                                                          | 2.95E-02 | 1.6 | 1.39E-02 | -1.8 | 2.52E-01 | NS   |
| A_42_P834852 | NM_001105844 | 287738    | Higd1b       | HIG1 hypoxia inducible domain family,<br>member 1B                                                                               | 3.29E-02 | 1.6 | 9.55E-01 | NS   | 2.61E-02 | -1.4 |
| A_44_P231444 | NM_001013042 | 287796    | Slc39a11     | solute carrier family 39 (metal ion<br>transporter), member 11                                                                   | 3.14E-02 | 1.6 | 9.62E-01 | NS   | 4.01E-02 | -1.8 |
| A_64_P077920 |              | 308956    | LOC308956    | similar to NAD(P) dependent steroid<br>dehydrogenase-like                                                                        | 1.77E-02 | 1.6 | 1.02E-01 | NS   | 6.90E-01 | NS   |
| A_64_P024497 | BF549728     |           |              |                                                                                                                                  | 4.40E-02 | 1.6 | 4.46E-02 | -1.9 | 5.82E-02 | NS   |
| A_64_P052440 | NM_001100630 | 360589    | Ints2        | integrator complex subunit 2                                                                                                     | 4.86E-03 | 1.6 | 4.48E-03 | 1.3  | 3.26E-01 | NS   |
| A_44_P483360 | NM_001108498 | 361625    | Nrip3        | nuclear receptor interacting protein 3                                                                                           | 4.60E-02 | 1.6 | 1.11E-02 | 1.5  | 1.13E-01 | NS   |
| A_64_P020968 | NM_001013063 | 292461    | Raet1l       | retinoic acid early transcript 1L                                                                                                | 1.29E-02 | 1.6 | 6.99E-01 | NS   | 1.07E-01 | NS   |
| A_64_P056485 | XM_001070932 | 498814    | Mtcp1        | mature T-cell proliferation 1<br>similar to receptor expression enhancing<br>protein 2                                           | 1.58E-02 | 1.6 | 2.13E-02 | 1.2  | 3.40E-01 | NS   |
| A_44_P392201 | NM_001048047 | 682105    | LOC682105    |                                                                                                                                  | 4.96E-02 | 1.6 | 8.54E-01 | NS   | 1.67E-01 | NS   |
| A_64_P104185 | XM_001068424 |           |              |                                                                                                                                  | 3.53E-02 | 1.6 | 1.41E-01 | NS   | 5.82E-01 | NS   |
| A_64_P071725 | XM_227554    | 310727    | Igsf2        | immunoglobulin superfamily, member 2                                                                                             | 1.89E-02 | 1.6 | 2.98E-01 | NS   | 1.43E-01 | NS   |
| A_42_P667696 | XM_236661    | 316023    | Dclk3        | doublecortin-like kinase 3                                                                                                       | 3.23E-02 | 1.6 | 4.96E-01 | NS   | 4.25E-02 | -2.2 |
| A_64_P140636 | NM_001109496 | 688390    | LOC688390    | hypothetical protein LOC688390                                                                                                   | 4.44E-02 | 1.6 | 6.52E-01 | NS   | 1.55E-02 | -1.7 |
| A_64_P090495 | XM_228242    |           |              |                                                                                                                                  | 4.78E-02 | 1.6 | 9.89E-01 | NS   | 3.60E-01 | NS   |
| A_42_P459855 | NM_001113791 | 501007    | RGD1562618   | similar to RIKEN cDNA 6030419C18 gene                                                                                            | 2.17E-02 | 1.6 | 2.60E-01 | NS   | 2.16E-02 | -1.6 |
| A_64_P290615 | NM_001099492 | 690729    | Vom2r19      | vomeronal 2 receptor, 19                                                                                                         | 4.55E-02 | 1.6 | 6.78E-01 | NS   | 6.91E-01 | NS   |
| A_64_P043033 | NM_001107110 | 304078    | Cbr3         | carbonyl reductase 3                                                                                                             | 2.39E-02 | 1.6 | 3.90E-01 | NS   | 5.02E-01 | NS   |
| A_64_P066694 | NM_001033898 | 64366     | Calu         | calumenin                                                                                                                        | 3.79E-03 | 1.6 | 3.18E-02 | 1.3  | 2.92E-02 | -1.4 |
| A_64_P058055 | XM_001053529 |           |              |                                                                                                                                  | 1.72E-02 | 1.6 | 2.22E-02 | 1.9  | 1.01E-02 | -1.4 |
| A_44_P493980 | NM_030841    | 81005     | Nptrx        | neuronal pentraxin receptor<br>caspase recruitment domain family,<br>member 9                                                    | 4.57E-02 | 1.6 | 8.25E-01 | NS   | 8.53E-01 | NS   |
| A_42_P678430 | NM_022303    | 64171     | Card9        | tumor necrosis factor (ligand) superfamily,<br>member 13                                                                         | 2.14E-02 | 1.6 | 3.07E-02 | 1.4  | 3.21E-01 | NS   |
| A_64_P059660 | NM_001009623 | 287437    | Tnfsf13      |                                                                                                                                  | 2.68E-02 | 1.6 | 1.53E-03 | 1.3  | 4.09E-02 | -1.9 |
| A_64_P085425 | NM_001109610 | 690795    | H2afj        | H2A histone family, member J                                                                                                     | 4.31E-02 | 1.6 | 5.64E-02 | NS   | 4.47E-02 | -1.7 |
| A_64_P010743 | NM_001109453 | 685046    | LOC685046    | hypothetical protein LOC685046<br>similar to chromosome 9 open reading<br>frame 7                                                | 3.27E-02 | 1.6 | 5.12E-01 | NS   | 4.20E-01 | NS   |
| A_42_P624493 | NM_001106561 | 296599    | RGD1311501   |                                                                                                                                  | 1.41E-02 | 1.6 | 8.16E-01 | NS   | 2.27E-02 | -3.3 |
| A_44_P532237 | NM_001108455 | 361435    | Fanca        | Fanconi anemia, complementation group A                                                                                          | 8.29E-04 | 1.6 | 8.89E-02 | NS   | 9.63E-01 | NS   |
| A_64_P162262 | NM_139111    | 245978    | Cklf         | chemokine-like factor                                                                                                            | 1.33E-02 | 1.6 | 7.14E-02 | NS   | 5.75E-01 | NS   |
| A_44_P131248 | XM_237105    |           |              |                                                                                                                                  | 3.76E-02 | 1.6 | 9.91E-02 | NS   | 1.36E-01 | NS   |
| A_64_P139387 | NM_030586    | 80773     | Cyb5b        | cytochrome b5 type B (outer mitochondrial<br>membrane)<br>biliverdin reductase B (flavin reductase<br>(NADPH))                   | 3.34E-02 | 1.6 | 6.18E-01 | NS   | 5.70E-02 | NS   |
| A_64_P071840 | NM_001106236 | 292737    | Blvrb        |                                                                                                                                  | 3.19E-02 | 1.6 | 4.73E-01 | NS   | 7.48E-02 | NS   |
| A_44_P490100 | XM_001060474 | 362702    | Lclat1       | lysocardiolipin acyltransferase 1                                                                                                | 1.14E-02 | 1.6 | 2.19E-01 | NS   | 1.20E-02 | -1.6 |
| A_44_P380527 | NM_001039378 | 287427    | Trappc1      | trafficking protein particle complex 1<br>solute carrier family 11 (proton-coupled<br>divalent metal ion transporters), member 2 | 3.87E-02 | 1.6 | 2.99E-02 | 1.1  | 3.34E-01 | NS   |
| A_64_P102433 | NM_013173    | 25715     | Slc11a2      |                                                                                                                                  | 2.91E-02 | 1.6 | 7.75E-02 | NS   | 6.15E-02 | NS   |
| A_44_P243689 | NM_001107932 | 313228    | Invs         | inversin                                                                                                                         | 1.71E-03 | 1.6 | 3.02E-01 | NS   | 9.75E-01 | NS   |
| A_64_P001740 | NM_053702    | 114494    | Ccna2        | cyclin A2                                                                                                                        | 2.34E-02 | 1.6 | 6.02E-02 | NS   | 9.01E-02 | NS   |
| A_42_P818287 | NM_001107762 | 311336    | Nusap1       | nucleolar and spindle associated protein 1                                                                                       | 4.59E-02 | 1.6 | 8.35E-02 | NS   | 2.04E-01 | NS   |
| A_43_P12839  | NM_053531    | 85491     | Vamp7        | vesicle-associated membrane protein 7                                                                                            | 1.45E-02 | 1.6 | 5.85E-01 | NS   | 6.97E-02 | NS   |
| A_64_P087188 | XM_002726633 | 100364138 | LOC100364138 | ferritin light chain 1-like<br>family with sequence similarity 84, member<br>A                                                   | 3.66E-02 | 1.6 | 1.93E-01 | NS   | 1.82E-02 | -1.4 |
| A_64_P061830 | NM_001127299 | 313969    | Fam84a       |                                                                                                                                  | 3.24E-02 | 1.6 | 1.70E-02 | 1.4  | 4.18E-01 | NS   |

|              |              |        |            |                                                                                             |          |     |          |     |          |      |
|--------------|--------------|--------|------------|---------------------------------------------------------------------------------------------|----------|-----|----------|-----|----------|------|
| A_44_P318957 | NM_001014779 | 680020 | Pcdhb8     | protocadherin beta 8                                                                        | 2.38E-02 | 1.6 | 2.23E-01 | NS  | 1.35E-01 | NS   |
| A_64_P286599 |              | 116669 | Vwf        | von Willebrand factor                                                                       | 3.58E-02 | 1.6 | 7.12E-01 | NS  | 1.51E-01 | NS   |
| A_44_P485640 | XM_001081626 | 287782 | RGD1565459 | similar to ribosomal protein L10a                                                           | 2.69E-02 | 1.6 | 2.56E-02 | 1.2 | 4.50E-02 | -1.5 |
| A_64_P030789 | NM_080777    | 113893 | Sncb       | synuclein, beta                                                                             | 1.75E-02 | 1.6 | 2.24E-01 | NS  | 1.24E-01 | NS   |
| A_64_P114462 | NM_001008877 | 362901 | LOC362901  | Ac1254                                                                                      | 2.56E-02 | 1.6 | 5.84E-01 | NS  | 2.82E-01 | NS   |
| A_64_P116922 | XM_002725159 |        |            |                                                                                             | 1.19E-02 | 1.6 | 2.55E-01 | NS  | 1.21E-01 | NS   |
| A_42_P780097 | NM_001008280 | 287633 | Lrrc59     | leucine rich repeat containing 59                                                           | 8.44E-03 | 1.6 | 2.33E-02 | 1.2 | 5.79E-01 | NS   |
| A_64_P127415 | NM_001109506 | 688581 | Elmod2     | ELMO/CED-12 domain containing 2                                                             | 3.93E-02 | 1.6 | 8.83E-01 | NS  | 9.71E-01 | NS   |
| A_64_P004695 | XM_001081678 | 287822 | RGD1311422 | similar to CG8841-PA                                                                        | 4.53E-03 | 1.6 | 4.38E-02 | 1.3 | 5.76E-02 | NS   |
| A_64_P052332 | XM_002726849 | 299488 | RGD1565705 | similar to chr2 synaptotagmin                                                               | 2.09E-02 | 1.6 | 6.30E-01 | NS  | 6.80E-02 | NS   |
| A_44_P962846 | NM_001107274 | 305987 | Dock5      | dedicator of cytokinesis 5                                                                  | 4.94E-02 | 1.6 | 2.90E-02 | 1.2 | 1.41E-01 | NS   |
| A_44_P346572 | NM_001008891 | 361233 | Ssr1       | signal sequence receptor, alpha                                                             | 9.89E-03 | 1.6 | 4.82E-01 | NS  | 3.92E-01 | NS   |
| A_64_P155701 | XM_001080815 | 303280 | RGD1307929 | similar to CG14967-PA                                                                       | 4.68E-02 | 1.6 | 7.27E-01 | NS  | 4.91E-02 | -1.2 |
| A_64_P132586 | NM_001108359 | 360928 | Dcun1d4    | DCN1, defective in cullin neddylation 1, domain containing 4 (S. cerevisiae)                | 1.77E-02 | 1.6 | 5.23E-01 | NS  | 4.82E-01 | NS   |
| A_44_P290879 | XM_001053669 | 311483 | Rrbp1      | ribosome binding protein 1                                                                  | 9.69E-03 | 1.6 | 1.64E-03 | 1.3 | 3.32E-01 | NS   |
| A_64_P123078 | NM_031620    | 58835  | Phgdh      | phosphoglycerate dehydrogenase major facilitator superfamily domain                         | 1.10E-02 | 1.6 | 7.48E-03 | 1.4 | 8.22E-02 | NS   |
| A_64_P015346 | NM_001106911 | 301388 | Mfsd6      | containing 6                                                                                | 1.71E-02 | 1.6 | 3.01E-01 | NS  | 2.29E-03 | -1.5 |
| A_43_P11451  | NM_012536    | 24291  | Ctrb1      | chymotrypsinogen B1                                                                         | 3.43E-02 | 1.6 | 8.15E-01 | NS  | 3.68E-02 | -1.5 |
| A_43_P17424  | NM_001024741 | 288242 | Chaf1b     | chromatin assembly factor 1, subunit B (p60)                                                | 1.48E-02 | 1.6 | 2.37E-02 | 1.2 | 8.73E-01 | NS   |
| A_44_P403501 | NM_001127597 | 690043 | Rnf168     | ring finger protein 168 similar to Werner syndrome helicase                                 | 3.86E-02 | 1.6 | 5.92E-01 | NS  | 2.87E-01 | NS   |
| A_64_P113525 | XM_001059940 | 290805 | RGD1564788 | homolog                                                                                     | 8.09E-03 | 1.6 | 6.82E-01 | NS  | 1.38E-02 | -1.6 |
| A_44_P339798 | NM_001109417 | 680522 | Hist1h1b   | histone cluster 1, H1b                                                                      | 4.43E-02 | 1.6 | 7.97E-01 | NS  | 8.43E-01 | NS   |
| A_64_P134397 | NM_001071776 | 365875 | Bola1      | bolA homolog 1 (E. coli)                                                                    | 4.98E-02 | 1.6 | 6.34E-02 | NS  | 1.05E-02 | -1.6 |
| A_44_P996482 | NM_001025410 | 297995 | Chmp5      | chromatin modifying protein 5                                                               | 3.80E-02 | 1.6 | 2.62E-02 | 1.3 | 2.33E-02 | -1.5 |
| A_42_P827204 | NM_001108740 | 362859 | Ckap4      | cytoskeleton-associated protein 4                                                           | 1.26E-02 | 1.6 | 2.40E-02 | 1.2 | 1.28E-01 | NS   |
| A_42_P576823 | XM_225460    | 366937 | RGD1566252 | similar to Ki-67                                                                            | 6.56E-03 | 1.6 | 1.05E-01 | NS  | 1.70E-01 | NS   |
| A_64_P090005 | XM_225089    | 290952 | RGD1563615 | similar to Contactin associated protein-like 3 precursor (Cell recognition molecule Caspr3) | 4.10E-02 | 1.6 | 1.50E-02 | 1.8 | 3.06E-01 | NS   |
| A_64_P045804 | XR_005933    | 365444 | LOC365444  | similar to CGI-09 protein                                                                   | 2.68E-02 | 1.6 | 5.86E-02 | NS  | 7.81E-01 | NS   |
| A_43_P12266  | NM_022622    | 64557  | Bard1      | BRCA1 associated RING domain 1                                                              | 8.11E-03 | 1.6 | 9.16E-02 | NS  | 3.72E-01 | NS   |
| A_42_P619114 | NM_001014204 | 362998 | Dnajc22    | DnaJ (Hsp40) homolog, subfamily C, member 22                                                | 3.15E-02 | 1.6 | 1.43E-01 | NS  | 2.39E-02 | -1.7 |
| A_64_P100586 | XR_008043    |        |            |                                                                                             | 4.83E-02 | 1.6 | 4.45E-01 | NS  | 2.31E-01 | NS   |
| A_42_P636627 | NM_017110    | 29131  | Cartpt     | CART prepropeptide                                                                          | 4.83E-02 | 1.6 | 2.36E-02 | 2.4 | 9.59E-01 | NS   |
| A_44_P888860 | NM_001134600 | 497896 | RGD1563273 | similar to hypothetical protein 9630041N07                                                  | 2.82E-02 | 1.6 | 6.50E-02 | NS  | 1.26E-01 | NS   |
| A_42_P783205 | NM_147145    | 259171 | Dclre1c    | DNA cross-link repair 1C, PSO2 homolog (S. cerevisiae)                                      | 9.17E-03 | 1.6 | 5.83E-02 | NS  | 3.93E-01 | NS   |
| A_44_P351141 | NM_133593    | 171126 | Ap3m1      | adaptor-related protein complex 3, mu 1 subunit                                             | 2.00E-02 | 1.6 | 2.20E-01 | NS  | 1.58E-01 | NS   |
| A_44_P285803 | NM_138892    | 192252 | Dctpp1     | dCTP pyrophosphatase 1                                                                      | 2.70E-02 | 1.6 | 4.87E-02 | 1.2 | 9.26E-01 | NS   |
| A_64_P063974 | XM_001067658 | 688624 | LOC688624  | hypothetical protein LOC688624                                                              | 3.85E-02 | 1.6 | 8.22E-01 | NS  | 5.16E-01 | NS   |
| A_64_P052697 | XM_002726157 |        |            |                                                                                             | 2.24E-02 | 1.6 | 5.96E-01 | NS  | 2.51E-01 | NS   |
| A_44_P463912 | NM_001170554 | 288654 | Mphosph9   | M-phase phosphoprotein 9                                                                    | 1.12E-02 | 1.6 | 3.78E-01 | NS  | 1.39E-01 | NS   |
| A_64_P018982 | NM_001108021 | 314111 | Khl15      | kelch-like 15 (Drosophila)                                                                  | 4.15E-02 | 1.7 | 6.63E-01 | NS  | 1.78E-02 | -1.5 |
| A_64_P098807 | XM_001073192 |        |            |                                                                                             | 4.03E-02 | 1.7 | 3.41E-01 | NS  | 2.53E-02 | -1.4 |
| A_42_P761778 | XM_576697    | 501282 | LOC501282  | similar to lymphocyte antigen 6 complex, locus E ligand                                     | 2.10E-02 | 1.7 | 6.53E-01 | NS  | 3.87E-02 | -1.6 |
| A_64_P014497 | NM_001100978 | 311405 | Tmem127    | transmembrane protein 127                                                                   | 4.90E-02 | 1.7 | 4.57E-01 | NS  | 1.15E-01 | NS   |
| A_42_P534172 | NM_053983    | 117054 | Cd52       | CD52 antigen                                                                                | 3.75E-02 | 1.7 | 1.62E-01 | NS  | 2.30E-01 | NS   |
| A_44_P998137 | NM_053461    | 84592  | Cetn1      | centrin 1                                                                                   | 2.06E-02 | 1.7 | 8.63E-02 | NS  | 4.95E-01 | NS   |
| A_64_P163718 | NM_001013187 | 361074 | Slc25a30   | solute carrier family 25, member 30                                                         | 1.76E-02 | 1.7 | 3.86E-01 | NS  | 6.88E-03 | -1.7 |
| A_44_P426924 | NM_001109531 | 689296 | LOC689296  | similar to expressed sequence C79407                                                        | 1.93E-02 | 1.7 | 6.26E-02 | NS  | 4.18E-01 | NS   |
| A_44_P258417 | NM_001009699 | 316237 | Mad211bp   | MAD2L1 binding protein                                                                      | 2.49E-02 | 1.7 | 6.63E-01 | NS  | 4.75E-01 | NS   |
| A_64_P040960 | NM_001126274 | 305458 | Tmem129    | transmembrane protein 129                                                                   | 1.96E-02 | 1.7 | 8.86E-02 | NS  | 2.58E-01 | NS   |
| A_64_P157020 | NM_001109244 | 500224 | Lbx2       | ladybird homeobox 2                                                                         | 1.35E-03 | 1.7 | 2.84E-02 | 1.4 | 9.49E-01 | NS   |

|               |              |        |            |                                                                                                      |          |     |          |     |          |      |
|---------------|--------------|--------|------------|------------------------------------------------------------------------------------------------------|----------|-----|----------|-----|----------|------|
| A_64_P142992  | NM_001025769 | 499943 | C2orf165   | chromosome 20 open reading frame 165                                                                 | 4.71E-02 | 1.7 | 9.71E-01 | NS  | 1.74E-01 | NS   |
| A_64_P136521  | XM_233308    | 298316 | Nkrf       | NFKB repressing factor                                                                               | 2.70E-02 | 1.7 | 6.16E-01 | NS  | 2.54E-01 | NS   |
| A_44_P318466  | NM_001009536 | 494338 | Trim25     | tripartite motif-containing 25                                                                       | 1.50E-02 | 1.7 | 9.87E-01 | NS  | 9.17E-03 | -1.7 |
| A_44_P161220  | NM_080482    | 140610 | Dcb1       | deleted in bladder cancer 1 (human)                                                                  | 1.49E-02 | 1.7 | 5.45E-02 | NS  | 7.28E-01 | NS   |
| A_64_P119916  | NM_024141    | 79107  | Duox2      | dual oxidase 2                                                                                       | 3.28E-02 | 1.7 | 4.42E-02 | 1.2 | 2.32E-02 | -1.7 |
| A_64_P021696  | XM_001057506 | 502541 | Lor        | loricin                                                                                              | 2.82E-02 | 1.7 | 9.71E-01 | NS  | 5.60E-02 | NS   |
| A_64_P089150  | NM_001127633 | 682457 | Txlna      | taxilin alpha                                                                                        | 4.44E-03 | 1.7 | 1.42E-01 | NS  | 8.67E-01 | NS   |
| A_64_P144143  | NM_001007146 | 315159 | Tob2       | transducer of ERBB2, 2                                                                               | 2.60E-02 | 1.7 | 4.99E-01 | NS  | 5.30E-01 | NS   |
| A_43_P10705   | NM_001014163 | 361675 | Cend1      | cell cycle exit and neuronal differentiation 1                                                       | 2.18E-02 | 1.7 | 5.25E-02 | NS  | 2.93E-01 | NS   |
| A_44_P468873  | XM_001055438 | 363484 | Chic1      | cysteine-rich hydrophobic domain 1                                                                   | 4.20E-02 | 1.7 | 8.54E-01 | NS  | 1.35E-02 | -2.4 |
| A_64_P006257  | EV777635     |        |            |                                                                                                      | 1.97E-02 | 1.7 | 7.71E-01 | NS  | 5.74E-01 | NS   |
| A_42_P540711  | NM_133568    | 171099 | Rasd2      | RASD family, member 2                                                                                | 1.41E-02 | 1.7 | 1.48E-01 | NS  | 1.04E-01 | NS   |
| A_44_P360650  | NM_001000066 | 288832 | Olr1058    | olfactory receptor 1058                                                                              | 1.52E-02 | 1.7 | 3.30E-01 | NS  | 3.18E-01 | NS   |
| A_64_P106853  | XR_008769    | 290671 | Ndufa13-ps | NADH dehydrogenase (ubiquinone) 1 alpha subcomplex 13 pseudogene                                     | 2.35E-02 | 1.7 | 6.55E-01 | NS  | 2.52E-01 | NS   |
| A_43_P21810   | NM_001025000 | 308129 | lyd        | iodotyrosine deiodinase                                                                              | 4.61E-02 | 1.7 | 6.60E-01 | NS  | 1.15E-01 | NS   |
| A_44_P352252  | NM_138841    | 192153 | Gpr26      | G protein-coupled receptor 26                                                                        | 4.52E-02 | 1.7 | 5.34E-01 | NS  | 3.55E-01 | NS   |
| A_44_P366251  | NM_001105862 | 287940 | Hic2       | hypermethylated in cancer 2                                                                          | 2.37E-02 | 1.7 | 6.43E-01 | NS  | 7.40E-01 | NS   |
| A_42_P604252  | NM_001108797 | 363236 | Fam117b    | family with sequence similarity 117, member B                                                        | 2.65E-02 | 1.7 | 2.98E-01 | NS  | 1.78E-01 | NS   |
| A_64_P012325  | NM_001106668 | 298280 | Slc35d1    | solute carrier family 35 (UDP-glucuronic acid/UDP-N-acetylgalactosamine dual transporter), member D1 | 4.90E-02 | 1.7 | 8.92E-01 | NS  | 3.88E-02 | -1.5 |
| A_64_P130407  | XM_001078620 | 691521 | LOC691521  | similar to MEGF11 protein                                                                            | 4.54E-02 | 1.7 | 2.08E-03 | 2.0 | 1.18E-01 | NS   |
| A_42_P467531  | XM_001077162 | 687121 | LOC687121  | 1                                                                                                    | 1.07E-02 | 1.7 | 7.03E-02 | NS  | 3.17E-01 | NS   |
| A_44_P1036481 | XM_002724884 |        |            |                                                                                                      | 3.36E-02 | 1.7 | 6.24E-01 | NS  | 5.47E-02 | NS   |
| A_64_P045388  | NM_031802    | 83633  | Gabbr2     | gamma-aminobutyric acid (GABA) B receptor 2                                                          | 4.47E-02 | 1.7 | 4.47E-01 | NS  | 9.80E-02 | NS   |
| A_64_P021433  | NM_001007755 | 363285 | Scly       | selenocysteine lyase                                                                                 | 3.04E-02 | 1.7 | 4.51E-03 | 1.3 | 3.03E-02 | -1.7 |
| A_44_P252623  | NM_001004097 | 408247 | Try10      | trypsin 10                                                                                           | 1.83E-03 | 1.7 | 3.73E-01 | NS  | 2.62E-01 | NS   |
| A_44_P121039  | NM_172008    | 29144  | Canx       | calnexin                                                                                             | 1.40E-02 | 1.7 | 2.19E-01 | NS  | 2.85E-02 | -1.7 |
| A_64_P042405  | NM_001106163 | 291794 | Snrpd1     | small nuclear ribonucleoprotein D1                                                                   | 4.34E-02 | 1.7 | 1.68E-01 | NS  | 8.19E-01 | NS   |
| A_64_P268234  | XM_343359    | 363028 | Spc24      | SPC24, NDC80 kinetochore complex component, homolog (S. cerevisiae)                                  | 1.64E-02 | 1.7 | 5.15E-01 | NS  | 9.13E-01 | NS   |
| A_44_P313825  | NM_019335    | 54287  | Eif2ak2    | eukaryotic translation initiation factor 2-alpha kinase 2                                            | 2.39E-02 | 1.7 | 4.88E-01 | NS  | 3.35E-02 | -1.4 |
| A_42_P678378  | NM_134472    | 171529 | Kif2c      | kinesin family member 2C                                                                             | 1.63E-02 | 1.7 | 2.77E-01 | NS  | 4.39E-02 | 2.2  |
| A_44_P425619  | BC166838     | 363109 | Pgm3       | phosphoglucomutase 3                                                                                 | 3.39E-02 | 1.7 | 1.39E-02 | 1.3 | 6.17E-02 | NS   |
| A_43_P12090   | NM_021662    | 59294  | Pold1      | polymerase (DNA directed), delta 1, catalytic subunit                                                | 4.57E-02 | 1.7 | 2.30E-01 | NS  | 9.91E-01 | NS   |
| A_44_P219628  | NM_053840    | 116568 | Ggt1       | gamma-glutamyltransferase 1                                                                          | 8.17E-03 | 1.7 | 1.91E-01 | NS  | 4.96E-01 | NS   |
| A_64_P106760  | NM_001025150 | 500101 | Tas2r40    | taste receptor, type 2, member 40                                                                    | 2.12E-02 | 1.7 | 7.37E-03 | 1.6 | 2.03E-01 | NS   |
| A_44_P109575  | NM_024154    | 79123  | Accn2      | amiloride-sensitive cation channel 2, neuronal                                                       | 4.02E-03 | 1.7 | 8.04E-01 | NS  | 7.92E-01 | NS   |
| A_64_P157939  | NM_001109357 | 502968 | Zfp352     | zinc finger protein 352                                                                              | 1.17E-02 | 1.7 | 6.55E-04 | 1.8 | 2.29E-01 | NS   |
| A_44_P1039606 | NM_001024257 | 307805 | Cenpt      | centromere protein T                                                                                 | 1.34E-02 | 1.7 | 1.10E-02 | 1.3 | 3.05E-01 | NS   |
| A_44_P368249  | NM_001173555 | 362508 | Spag8      | sperm associated antigen 8                                                                           | 8.82E-03 | 1.7 | 5.78E-03 | 1.3 | 4.26E-01 | NS   |
| A_44_P682891  | NM_001007617 | 289419 | Nuak2      | NUAK family, SNF1-like kinase, 2                                                                     | 2.26E-02 | 1.7 | 3.86E-01 | NS  | 4.97E-01 | NS   |
| A_44_P182807  | NM_001108401 | 361174 | Alg11      | asparagine-linked glycosylation 11, alpha-1,2-mannosyltransferase homolog (yeast)                    | 1.68E-02 | 1.7 | 1.00E-01 | NS  | 3.95E-02 | -1.3 |
| A_64_P004488  | NM_001000125 | 293193 | Olr44      | olfactory receptor 44                                                                                | 2.19E-02 | 1.7 | 6.06E-01 | NS  | 6.53E-01 | NS   |
| A_42_P719607  | NM_153721    | 246358 | Pbbp       | pro-platelet basic protein (chemokine (C-X-C motif) ligand 7)                                        | 2.69E-03 | 1.7 | 6.18E-01 | NS  | 1.92E-01 | NS   |
| A_64_P111749  | XM_001057533 | 84391  | Kif2a      | kinesin family member 2A                                                                             | 2.06E-02 | 1.7 | 4.83E-03 | 1.9 | 8.59E-01 | NS   |
| A_64_P003363  | XM_001063568 |        |            |                                                                                                      | 3.92E-02 | 1.7 | 5.83E-01 | NS  | 3.83E-01 | NS   |
| A_64_P307087  | XM_001058120 | 680643 | LOC680643  | similar to MIC2 like 1                                                                               | 2.33E-02 | 1.7 | 1.81E-01 | NS  | 5.46E-03 | -1.8 |

|               |              |        |            |                                                                                                                |          |     |          |      |          |      |
|---------------|--------------|--------|------------|----------------------------------------------------------------------------------------------------------------|----------|-----|----------|------|----------|------|
| A_44_P454232  | NM_201561    | 306942 | Scgn       | secretagogin, EF-hand calcium binding protein                                                                  | 4.37E-02 | 1.7 | 9.92E-01 | NS   | 1.38E-01 | NS   |
| A_64_P126999  | NM_001000925 | 405243 | Olr661     | olfactory receptor 661                                                                                         | 3.26E-02 | 1.7 | 3.61E-01 | NS   | 7.65E-01 | NS   |
| A_64_P153870  | NM_001047854 | 293628 | Chid1      | chitinase domain containing 1 family with sequence similarity 18, member B2                                    | 2.92E-02 | 1.7 | 3.25E-03 | 1.3  | 4.90E-01 | NS   |
| A_44_P335247  | NM_001107568 | 687358 | Fam18b2    | G2e3                                                                                                           | 3.30E-02 | 1.7 | 1.03E-01 | NS   | 9.22E-01 | NS   |
| A_64_P047465  | NM_001106726 | 299002 | G2e3       | G2/M-phase specific E3 ubiquitin ligase                                                                        | 2.62E-02 | 1.7 | 2.68E-01 | NS   | 9.59E-02 | NS   |
| A_64_P120836  | NM_053903    | 116683 | Efna5      | efrin A5                                                                                                       | 1.96E-02 | 1.7 | 5.22E-01 | NS   | 4.52E-02 | -1.6 |
| A_64_P330354  | NM_001170471 | 305955 | Zc3h13     | zinc finger CCCH type containing 13                                                                            | 2.40E-02 | 1.7 | 3.56E-01 | NS   | 3.15E-02 | -1.7 |
| A_44_P481398  | NM_022861    | 64829  | Unc13a     | unc-13 homolog A (C. elegans)                                                                                  | 3.44E-02 | 1.7 | 1.40E-01 | NS   | 7.02E-02 | NS   |
| A_44_P1011716 | NM_017161    | 29316  | Adora2b    | adenosine A2B receptor                                                                                         | 3.92E-02 | 1.7 | 3.16E-02 | 1.2  | 6.11E-02 | NS   |
| A_64_P111714  | NM_001108566 | 362040 | Ostc       | oligosaccharyltransferase complex subunit                                                                      | 4.37E-02 | 1.7 | 8.59E-03 | 1.4  | 5.93E-01 | NS   |
| A_64_P059565  | NM_183403    | 29326  | Gpx2       | glutathione peroxidase 2                                                                                       | 2.52E-02 | 1.7 | 9.32E-02 | NS   | 6.86E-02 | NS   |
| A_44_P507571  | NM_001100821 | 25729  | Ccne1      | cyclin E1                                                                                                      | 8.84E-03 | 1.7 | 2.57E-01 | NS   | 3.04E-01 | NS   |
| A_42_P804913  | XR_086142    | 361773 | RGD1307158 | similar to oocyte-testis gene 1                                                                                | 1.54E-02 | 1.7 | 4.18E-01 | NS   | 5.86E-03 | -1.9 |
| A_64_P144711  | XM_002724915 | 678708 | LOC678708  | similar to histone 1, H2ai mesoderm specific transcript homolog (mouse)                                        | 4.93E-02 | 1.7 | 5.98E-01 | NS   | 5.01E-01 | NS   |
| A_64_P032683  | NM_001009617 | 58827  | Mest       | mesoderm specific transcript homolog (mouse)                                                                   | 3.54E-02 | 1.7 | 8.23E-01 | NS   | 5.23E-02 | NS   |
| A_64_P035843  | CB763787     | 499352 | RGD1561251 | RGD1561251                                                                                                     | 4.82E-02 | 1.7 | 4.14E-02 | -1.7 | 3.98E-01 | NS   |
| A_64_P106739  | XM_579959    | 499399 | RGD1559984 | RGD1559984                                                                                                     | 2.85E-02 | 1.7 | 6.55E-01 | NS   | 3.21E-01 | NS   |
| A_64_P162633  | NM_054000    | 117105 | Kcnb2      | potassium voltage gated channel, Shab-related subfamily, member 2                                              | 3.91E-02 | 1.7 | 4.86E-01 | NS   | 1.29E-02 | -2.1 |
| A_42_P580844  | NM_019296    | 54237  | Cdc2       | cell division cycle 2, G1 to S and G2 to M                                                                     | 2.86E-02 | 1.7 | 9.01E-02 | NS   | 8.15E-02 | NS   |
| A_64_P005810  | XM_001067223 |        |            |                                                                                                                | 4.01E-02 | 1.7 | 9.31E-01 | NS   | 4.50E-02 | -2.4 |
| A_64_P006183  | XM_001081399 | 363677 | Gjd3       | gap junction protein, delta 3                                                                                  | 4.75E-02 | 1.7 | 1.71E-01 | NS   | 6.84E-01 | NS   |
| A_64_P000539  | NM_053930    | 116727 | Gp1bb      | glycoprotein Ib (platelet), beta polypeptide                                                                   | 7.70E-03 | 1.7 | 6.87E-02 | NS   | 6.00E-01 | NS   |
| A_64_P117303  | NM_001008757 | 303527 | Krt33a     | keratin 33A                                                                                                    | 3.86E-02 | 1.7 | 5.20E-01 | NS   | 6.51E-01 | NS   |
| A_44_P231583  | NM_032462    | 65199  | Kcnp3      | Kv channel interacting protein 3, calсениlin                                                                   | 1.90E-02 | 1.7 | 5.75E-02 | NS   | 1.08E-01 | NS   |
| A_44_P531770  | NM_022183    | 360243 | Top2a      | topoisomerase (DNA) II alpha                                                                                   | 3.06E-02 | 1.7 | 7.66E-02 | NS   | 1.88E-02 | 3.3  |
| A_64_P108200  | NM_001009645 | 293502 | Kif22      | kinesin family member 22                                                                                       | 3.10E-02 | 1.7 | 4.50E-02 | 1.2  | 1.30E-01 | NS   |
| A_64_P029551  | NM_212466    | 294257 | Cfb        | complement factor B                                                                                            | 4.03E-02 | 1.7 | 3.24E-02 | 1.3  | 2.61E-02 | -3.5 |
| A_64_P145852  | NM_001100983 | 362816 | Myl6l      | myosin, light polypeptide 6, alkali, smooth muscle and non-muscle-like                                         | 4.79E-02 | 1.7 | 1.21E-01 | NS   | 4.01E-02 | -1.4 |
| A_44_P283339  | NM_001004249 | 300888 | Tmed3      | transmembrane emp24 protein transport domain containing 3                                                      | 2.14E-02 | 1.7 | 1.39E-02 | 1.2  | 1.58E-01 | NS   |
| A_44_P148407  | NM_001004442 | 286906 | Pdia6      | protein disulfide isomerase family A, member 6                                                                 | 3.42E-03 | 1.7 | 8.83E-04 | 1.5  | 5.37E-01 | NS   |
| A_64_P150759  | XM_001054323 | 679750 | LOC679750  | similar to Salivary gland secretion 1                                                                          | 2.53E-02 | 1.7 | 8.14E-02 | NS   | 3.22E-01 | NS   |
| A_44_P313767  | NM_022712    | 64678  | Tfrc       | CG3047-PA transferrin receptor                                                                                 | 2.02E-02 | 1.7 | 2.25E-02 | 1.3  | 3.53E-01 | NS   |
| A_64_P074332  | NM_001108183 | 315989 | Manf       | mesencephalic astrocyte-derived neurotrophic factor                                                            | 1.93E-02 | 1.7 | 4.48E-02 | 1.4  | 4.81E-01 | NS   |
| A_64_P068353  | XM_225460    | 366937 | RGD1566252 | similar to Ki-67                                                                                               | 5.38E-03 | 1.7 | 1.21E-01 | NS   | 1.75E-01 | NS   |
| A_44_P231269  | NM_053551    | 89813  | Pdk4       | pyruvate dehydrogenase kinase, isozyme 4                                                                       | 3.54E-02 | 1.7 | 5.36E-01 | NS   | 1.33E-01 | NS   |
| A_44_P192543  | NM_001013105 | 300211 | Fkbp11     | FK506 binding protein 11                                                                                       | 4.32E-03 | 1.7 | 2.10E-03 | 1.4  | 9.40E-02 | NS   |
| A_42_P757414  | XM_001074393 | 290396 | Diaph3     | diaphanous homolog 3 (Drosophila)                                                                              | 3.90E-02 | 1.7 | 3.35E-01 | NS   | 4.33E-01 | NS   |
| A_64_P057340  | NM_133411    | 170924 | Abcc4      | ATP-binding cassette, sub-family C (CFTR/MRP), member 4                                                        | 1.38E-02 | 1.7 | 5.71E-02 | NS   | 2.36E-01 | NS   |
| A_64_P104469  | NM_001044224 | 252918 | Spag5      | sperm associated antigen 5                                                                                     | 9.58E-03 | 1.7 | 6.51E-02 | NS   | 2.09E-01 | NS   |
| A_64_P011000  | XM_001070045 | 501590 | RGD1562081 | RGD1562081                                                                                                     | 2.77E-02 | 1.7 | 2.08E-01 | NS   | 2.79E-01 | NS   |
| A_44_P252491  | NM_053870    | 116649 | Kcnj4      | potassium inwardly-rectifying channel, subfamily J, member 4                                                   | 2.08E-02 | 1.7 | 1.17E-01 | NS   | 1.13E-01 | NS   |
| A_64_P066601  | NM_001106323 | 293660 | Rhod       | ras homolog gene family, member D similar to N-acetyltransferase ESCO2 (Establishment of cohesion 1 homolog 2) | 1.46E-02 | 1.7 | 7.17E-02 | NS   | 8.16E-02 | NS   |
| A_64_P072204  | XM_002725115 | 691979 | LOC691979  | (ECO1 homolog 2)                                                                                               | 4.89E-02 | 1.7 | 1.47E-02 | 1.7  | 1.32E-01 | NS   |
| A_64_P111495  | NM_001106977 | 302935 | Ubn1       | (ECO1 homolog 2) ubinuclein 1                                                                                  | 2.24E-02 | 1.7 | 9.20E-01 | NS   | 5.24E-01 | NS   |

|               |              |        |            |                                                                                                    |          |     |          |      |          |      |
|---------------|--------------|--------|------------|----------------------------------------------------------------------------------------------------|----------|-----|----------|------|----------|------|
| A_64_P043722  | NM_022286    | 64060  | Vps33b     | vacuolar protein sorting 33 homolog B (yeast)                                                      | 4.04E-02 | 1.7 | 2.27E-01 | NS   | 1.27E-01 | NS   |
| A_64_P092787  | XM_001067275 | 295117 | RGD1562064 | similar to hypothetical protein MGC48915                                                           | 8.79E-03 | 1.7 | 6.27E-02 | NS   | 7.23E-01 | NS   |
| A_44_P1019148 | NM_001040180 | 292777 | Tbcb       | tubulin folding cofactor B                                                                         | 2.88E-02 | 1.7 | 3.68E-02 | 1.3  | 2.80E-01 | NS   |
| A_64_P156543  | NM_001053368 |        |            |                                                                                                    | 3.86E-02 | 1.7 | 2.69E-03 | 1.3  | 1.95E-01 | NS   |
| A_64_P121427  | XM_001108613 | 362287 | Slc17a9    | solute carrier family 17, member 9                                                                 | 2.61E-03 | 1.7 | 1.43E-02 | 1.4  | 3.38E-01 | NS   |
| A_44_P653701  | NM_001106536 | 296344 | Mybl2      | myeloblastosis oncogene-like 2                                                                     | 3.53E-03 | 1.7 | 1.91E-01 | NS   | 3.31E-02 | 2.6  |
| A_64_P109337  | XM_002725565 |        |            |                                                                                                    | 1.47E-03 | 1.7 | 1.48E-02 | 1.3  | 3.61E-01 | NS   |
| A_44_P1013006 | NM_001106629 | 297738 | Steap1     | six transmembrane epithelial antigen of the prostate 1                                             | 3.52E-02 | 1.7 | 2.52E-03 | 1.7  | 1.61E-02 | 1.7  |
| A_64_P105211  | XM_233310    |        |            |                                                                                                    | 2.94E-02 | 1.7 | 1.94E-01 | NS   | 2.95E-01 | NS   |
| A_44_P520349  | XM_573544    | 305123 | Brdt       | bromodomain, testis-specific                                                                       | 6.90E-03 | 1.7 | 1.94E-01 | NS   | 1.74E-01 | NS   |
| A_44_P215157  | NM_021758    | 60377  | Lin7b      | lin-7 homolog b (C. elegans)                                                                       | 1.42E-02 | 1.7 | 2.19E-01 | NS   | 2.86E-01 | NS   |
| A_64_P040213  | XM_001074243 |        |            |                                                                                                    | 4.28E-02 | 1.7 | 7.18E-01 | NS   | 8.87E-01 | NS   |
| A_64_P078822  | NM_001024259 | 310914 | Bmpr1b     | bone morphogenetic protein receptor, type IB                                                       | 9.75E-03 | 1.7 | 2.38E-02 | 1.2  | 2.71E-02 | -1.6 |
| A_64_P005208  | NM_017000    | 24314  | Nqo1       | NAD(P)H dehydrogenase, quinone 1                                                                   | 2.21E-02 | 1.7 | 8.10E-02 | NS   | 2.16E-01 | NS   |
| A_44_P1008950 | NM_001013880 | 290651 | Isyna1     | inositol-3-phosphate synthase 1                                                                    | 5.27E-03 | 1.7 | 7.02E-02 | NS   | 2.38E-01 | NS   |
| A_64_P081020  | XM_001053529 |        |            |                                                                                                    | 1.07E-02 | 1.7 | 8.95E-01 | NS   | 9.74E-01 | NS   |
| A_64_P114338  | NM_001109201 | 499836 | RGD1563263 | similar to RIKEN cDNA 1700029115 protein tyrosine phosphatase, receptor type, H                    | 1.20E-02 | 1.7 | 4.49E-01 | NS   | 1.27E-01 | NS   |
| A_44_P290457  | XM_574357    | 171125 | Ptprh      | similar to RIKEN cDNA 1700029115 protein tyrosine phosphatase, receptor type, H                    | 4.42E-02 | 1.7 | 3.46E-02 | -1.2 | 8.21E-01 | NS   |
| A_64_P119765  | XM_001069014 | 688972 | LOC688972  | similar to Glycophorin                                                                             | 4.90E-02 | 1.7 | 5.74E-01 | NS   | 4.54E-02 | -1.9 |
| A_64_P044137  | NM_001135896 | 362945 | Lrrc24     | leucine rich repeat containing 24 similar to NADH dehydrogenase (ubiquinone) 1 beta subcomplex 3   | 1.21E-02 | 1.7 | 1.09E-02 | 1.4  | 1.11E-02 | -1.9 |
| A_44_P171008  | XM_001053805 | 678918 | LOC678918  | (ubiquinone) 1 beta subcomplex 3                                                                   | 2.62E-02 | 1.7 | 3.67E-02 | 1.4  | 4.50E-01 | NS   |
| A_44_P362954  | NM_012520    | 24248  | Cat        | catalase                                                                                           | 3.90E-03 | 1.7 | 2.50E-01 | NS   | 8.44E-01 | NS   |
| A_64_P101204  | NM_133315    | 170840 | Slc40a1    | solute carrier family 39 (iron-regulated transporter), member 1                                    | 1.15E-02 | 1.7 | 4.29E-01 | NS   | 8.31E-01 | NS   |
| A_64_P023219  | XM_001065024 | 685727 | LOC685727  | similar to neuron navigator 3                                                                      | 2.45E-02 | 1.7 | 2.48E-01 | NS   | 1.49E-01 | NS   |
| A_64_P042890  |              | 503150 | RGD1561670 | similar to ribosomal protein budding uninhibited by benzimidazoles 1 homolog, beta (S. cerevisiae) | 2.41E-02 | 1.7 | 8.33E-01 | NS   | 2.65E-02 | -1.6 |
| A_43_P10723   | XM_001080736 | 171576 | Bub1b      | similar to keratinocytes associated protein 3                                                      | 3.63E-02 | 1.7 | 2.50E-02 | 1.4  | 8.13E-02 | NS   |
| A_43_P19743   | NM_001109674 | 683980 | LOC683980  |                                                                                                    | 2.75E-02 | 1.7 | 2.16E-01 | NS   | 3.92E-02 | -1.9 |
| A_64_P096157  | XM_347163    |        |            |                                                                                                    | 4.09E-02 | 1.7 | 1.15E-01 | NS   | 2.78E-01 | NS   |
| A_44_P342578  | XM_217568    | 302396 | RGD1561931 | similar to KIAA2022 protein                                                                        | 2.37E-02 | 1.7 | 1.78E-01 | NS   | 4.48E-03 | -2.1 |
| A_42_P477311  | NM_001013170 | 314442 | Wars       | tryptophanyl-tRNA synthetase                                                                       | 2.24E-02 | 1.7 | 1.40E-01 | NS   | 2.41E-01 | NS   |
| A_64_P165877  | AY387058     |        |            |                                                                                                    | 3.69E-02 | 1.7 | 6.96E-02 | NS   | 5.70E-02 | NS   |
| A_44_P214811  | NM_022712    | 64678  | Tfrc       | transferrin receptor                                                                               | 8.43E-03 | 1.7 | 1.11E-02 | 1.4  | 6.15E-02 | NS   |
| A_64_P072422  | XM_001079712 |        |            |                                                                                                    | 3.87E-02 | 1.7 | 3.35E-02 | 1.2  | 9.21E-02 | NS   |
| A_64_P012154  | XM_225935    | 291595 | RGD1561627 | similar to hypothetical protein 4930474N05                                                         | 2.27E-02 | 1.7 | 8.71E-01 | NS   | 1.93E-01 | NS   |
| A_42_P496322  | XM_574285    | 498995 | Ncoa7      | nuclear receptor coactivator 7                                                                     | 2.64E-02 | 1.7 | 9.67E-01 | NS   | 1.31E-02 | -2.1 |
| A_44_P336608  | NM_001106831 | 300783 | RGD1565496 | similar to Butyrate-induced transcript 1 mitogen-activated protein kinase kinase                   | 2.32E-02 | 1.7 | 2.34E-01 | NS   | 2.02E-01 | NS   |
| A_64_P080887  | XM_002726763 | 500690 | Map3k9     | kinase 9                                                                                           | 9.91E-03 | 1.7 | 5.93E-02 | NS   | 9.95E-01 | NS   |
| A_64_P000645  | NM_001029918 | 311123 | Ttc30a1    | tetratricopeptide repeat domain 30A1                                                               | 4.14E-02 | 1.7 | 3.00E-01 | NS   | 2.02E-01 | NS   |
| A_44_P546537  | NM_021663    | 59295  | Nucb2      | nucleobindin 2                                                                                     | 3.00E-02 | 1.7 | 9.42E-03 | 1.3  | 1.51E-01 | NS   |
| A_64_P014366  | NM_053770    | 114901 | Sorbs2     | sorbin and SH3 domain containing 2 neurotrophic tyrosine kinase, receptor, type 2                  | 1.86E-02 | 1.7 | 6.91E-01 | NS   | 1.57E-02 | -1.7 |
| A_43_P15837   | NM_001163169 | 25054  | Ntrk2      | serine (or cysteine) peptidase inhibitor, clade A (alpha-1 antitrypsinase, antitrypsin), member 11 | 3.80E-02 | 1.7 | 5.18E-01 | NS   | 2.80E-01 | NS   |
| A_44_P172787  | NM_001008776 | 362774 | Serpina11  | antitrypsin, member 11                                                                             | 4.35E-02 | 1.7 | 7.60E-01 | NS   | 1.34E-01 | NS   |
| A_64_P114278  | NM_001000519 | 315573 | Olr1307    | olfactory receptor 1307                                                                            | 8.95E-03 | 1.7 | 2.51E-01 | NS   | 7.02E-01 | NS   |
| A_44_P548559  | NM_001109577 | 690315 | Derl3      | Der1-like domain family, member 3                                                                  | 2.13E-02 | 1.8 | 3.27E-04 | 2.1  | 3.61E-01 | NS   |
| A_64_P010214  | NM_001135780 | 313108 | RGD1304693 | similar to CG14803-PA                                                                              | 6.95E-03 | 1.8 | 1.34E-02 | 1.4  | 1.83E-01 | NS   |
| A_64_P059640  | NM_012916    | 25393  | Bcan       | brevican                                                                                           | 4.27E-02 | 1.8 | 8.72E-01 | NS   | 2.04E-01 | NS   |
| A_64_P066689  | NM_001033898 | 64366  | Calu       | calumenin                                                                                          | 4.89E-02 | 1.8 | 4.87E-02 | 1.2  | 2.04E-01 | NS   |

|              |              |        |            |                                                                                                                             |          |     |          |      |          |      |
|--------------|--------------|--------|------------|-----------------------------------------------------------------------------------------------------------------------------|----------|-----|----------|------|----------|------|
| A_64_P125345 | NM_053630    | 114032 | Kcnh4      | potassium voltage-gated channel, subfamily H (eag-related), member 4                                                        | 1.48E-02 | 1.8 | 4.53E-01 | NS   | 2.10E-02 | -2.0 |
| A_64_P061061 | NM_001109177 | 499539 | Lmbrd2     | LMBR1 domain containing 2                                                                                                   | 3.18E-02 | 1.8 | 3.76E-01 | NS   | 3.67E-01 | NS   |
| A_64_P020769 | NM_001108205 | 316238 | Rsph9      | radial spoke head 9 homolog (Chlamydomonas)                                                                                 | 4.37E-02 | 1.8 | 1.23E-02 | 1.3  | 2.16E-01 | NS   |
| A_42_P621872 | NM_172091    | 24953  | Gcgr       | glucagon receptor                                                                                                           | 2.34E-02 | 1.8 | 7.71E-01 | NS   | 2.50E-01 | NS   |
| A_44_P555767 | XM_234477    |        |            |                                                                                                                             | 4.32E-02 | 1.8 | 5.59E-01 | NS   | 9.93E-01 | NS   |
| A_42_P540609 | XM_001056892 | 680711 | LOC680711  | hypothetical protein LOC680711                                                                                              | 4.85E-02 | 1.8 | 1.85E-01 | NS   | 5.15E-01 | NS   |
| A_43_P12769  | NM_053329    | 79438  | Igfals     | insulin-like growth factor binding protein, acid labile subunit                                                             | 2.20E-03 | 1.8 | 1.79E-03 | 1.3  | 8.23E-02 | NS   |
| A_42_P757258 | NM_001107609 | 309523 | Kif20b     | kinesin family member 20B                                                                                                   | 1.93E-02 | 1.8 | 1.66E-02 | 1.3  | 2.24E-01 | NS   |
| A_64_P055972 | NM_001109520 | 688996 | Kcnk16     | potassium channel, subfamily K, member 16                                                                                   | 4.03E-02 | 1.8 | 8.71E-01 | NS   | 1.17E-01 | NS   |
| A_64_P014286 | NM_001107774 | 311422 | Itpa       | inosine triphosphatase (nucleoside triphosphate pyrophosphatase)                                                            | 3.63E-02 | 1.8 | 3.81E-01 | NS   | 4.28E-01 | NS   |
| A_64_P163031 | NM_139111    | 245978 | Ck1f       | chemokine-like factor                                                                                                       | 2.35E-02 | 1.8 | 9.65E-02 | NS   | 7.57E-01 | NS   |
| A_64_P110059 | NM_001009694 | 314140 | LOC314140  | ribose-phosphate pyrophosphokinase I-like family with sequence similarity 3, member B                                       | 6.76E-03 | 1.8 | 5.77E-01 | NS   | 7.55E-01 | NS   |
| A_44_P103349 | NM_001107102 | 304050 | Fam3b      |                                                                                                                             | 1.80E-02 | 1.8 | 4.49E-01 | NS   | 2.04E-01 | NS   |
| A_64_P037993 | NM_001109612 | 690845 | Rps4y2     | ribosomal protein S4, Y-linked 2                                                                                            | 2.87E-02 | 1.8 | 2.30E-02 | 1.4  | 4.68E-04 | -2.3 |
| A_64_P126170 | XM_002724899 | 683955 | LOC683955  | similar to Feline leukemia virus subgroup C receptor-related protein 1 (Feline leukemia virus subgroup C receptor) (hFLVCR) | 4.04E-02 | 1.8 | 6.34E-01 | NS   | 5.91E-01 | NS   |
| A_44_P443328 | NM_001127657 | 317395 | Spin2a     | spindlin family, member 2A                                                                                                  | 3.59E-02 | 1.8 | 4.51E-01 | NS   | 1.43E-01 | NS   |
| A_44_P838888 | XM_001081096 | 360588 | Brip1      | BRCA1 interacting protein C-terminal helicase 1                                                                             | 5.04E-03 | 1.8 | 1.05E-02 | 1.6  | 1.58E-01 | NS   |
| A_64_P146557 | NM_133587    | 171119 | Dscam      | Down syndrome cell adhesion molecule                                                                                        | 3.27E-02 | 1.8 | 2.76E-01 | NS   | 7.63E-02 | NS   |
| A_44_P577090 | NM_001109204 | 499870 | Rad51      | RAD51 homolog (RecA homolog, E. coli) (S. cerevisiae)                                                                       | 5.94E-03 | 1.8 | 1.13E-01 | NS   | 3.91E-01 | NS   |
| A_64_P162780 | NM_001034188 | 309651 | Ppil1      | peptidylprolyl isomerase (cyclophilin)-like 1                                                                               | 3.32E-02 | 1.8 | 2.57E-02 | 1.2  | 2.42E-01 | NS   |
| A_44_P377396 | NM_001013151 | 309242 | Gna14      | guanine nucleotide binding protein, alpha 14                                                                                | 1.94E-02 | 1.8 | 1.03E-01 | NS   | 5.14E-01 | NS   |
| A_64_P041902 | NM_001025653 | 298309 | Lrrc42     | leucine rich repeat containing 42                                                                                           | 2.61E-02 | 1.8 | 1.53E-01 | NS   | 8.80E-02 | NS   |
| A_64_P107642 | NM_001106227 | 292654 | Tmem160    | transmembrane protein 160                                                                                                   | 3.81E-02 | 1.8 | 8.82E-02 | NS   | 3.46E-02 | -1.5 |
| A_44_P993914 | NM_001014125 | 360722 | Pdia5      | protein disulfide isomerase family A, member 5                                                                              | 3.55E-02 | 1.8 | 4.03E-02 | 1.2  | 5.36E-01 | NS   |
| A_64_P150371 | NM_001126270 | 301701 | Ndc80      | NDC80 homolog, kinetochore complex component (S. cerevisiae)                                                                | 4.12E-02 | 1.8 | 4.13E-02 | 1.3  | 1.99E-01 | NS   |
| A_64_P125801 | XM_344537    |        |            |                                                                                                                             | 1.88E-03 | 1.8 | 8.66E-01 | NS   | 2.04E-01 | NS   |
| A_64_P016072 | XM_342232    | 361932 | RGD1561393 | similar to CG15133-PA                                                                                                       | 4.01E-02 | 1.8 | 3.12E-01 | NS   | 2.91E-02 | -1.5 |
| A_42_P640792 | NM_053388    | 84403  | Gjb6       | gap junction protein, beta 6                                                                                                | 2.21E-02 | 1.8 | 5.15E-01 | NS   | 4.97E-01 | NS   |
| A_64_P078997 | XM_001066532 | 315327 | Spryd3     | SPRY domain containing 3                                                                                                    | 3.67E-02 | 1.8 | 1.46E-01 | NS   | 1.63E-02 | -1.6 |
| A_42_P838822 | NM_001037198 | 311536 | RGD1304644 | similar to RIKEN cDNA 2310046K01                                                                                            | 3.21E-02 | 1.8 | 5.26E-01 | NS   | 1.86E-01 | NS   |
| A_44_P323349 | NM_017263    | 29629  | Gria4      | glutamate receptor, ionotropic, AMPA4                                                                                       | 1.15E-02 | 1.8 | 5.81E-01 | NS   | 1.78E-03 | -1.8 |
| A_44_P468193 | NM_145773    | 252915 | Mxd3       | Max dimerization protein 3                                                                                                  | 9.96E-03 | 1.8 | 4.75E-01 | NS   | 9.11E-01 | NS   |
| A_64_P037486 | NM_001109551 | 689864 | Msgn1      | mesogenin 1                                                                                                                 | 1.59E-02 | 1.8 | 1.54E-01 | NS   | 7.65E-01 | NS   |
| A_44_P116591 | NM_134455    | 89808  | Cx3cl1     | chemokine (C-X3-C motif) ligand 1                                                                                           | 4.17E-02 | 1.8 | 5.31E-01 | NS   | 1.11E-01 | NS   |
| A_64_P082557 | XM_001057715 |        |            |                                                                                                                             | 2.75E-03 | 1.8 | 2.80E-02 | 1.3  | 5.56E-01 | NS   |
| A_64_P061120 | NM_001166344 | 294268 | Btnl4      | butyrophilin-like 4                                                                                                         | 4.52E-02 | 1.8 | 8.49E-01 | NS   | 3.02E-01 | NS   |
| A_64_P125045 | NM_001013903 | 293634 | Tmem171    | transmembrane protein 171                                                                                                   | 4.56E-02 | 1.8 | 4.41E-01 | NS   | 2.31E-02 | -1.4 |
| A_43_P14233  | NM_022391    | 64193  | Pttg1      | pituitary tumor-transforming 1                                                                                              | 3.46E-02 | 1.8 | 1.03E-01 | NS   | 3.29E-01 | NS   |
| A_64_P002066 | XM_001056138 | 680214 | LOC680214  | hypothetical protein LOC680214                                                                                              | 4.55E-02 | 1.8 | 6.55E-01 | NS   | 5.28E-01 | NS   |
| A_64_P062976 | NM_001014059 | 312711 | RGD1304952 | similar to RIKEN cDNA C530028O21 gene                                                                                       | 9.96E-03 | 1.8 | 3.29E-02 | -1.3 | 3.85E-02 | -2.5 |
| A_64_P014962 | XM_002727995 | 313149 | LOC313149  | hypothetical LOC313149                                                                                                      | 9.38E-04 | 1.8 | 7.18E-01 | NS   | 7.90E-01 | NS   |
| A_64_P129945 | NM_001008828 | 300247 | Krt75      | keratin 75                                                                                                                  | 1.19E-02 | 1.8 | 2.13E-01 | NS   | 4.21E-01 | NS   |
| A_44_P299571 | NM_022705    | 64669  | Olah       | oleoyl-ACP hydrolase                                                                                                        | 4.85E-02 | 1.8 | 8.41E-01 | NS   | 1.72E-01 | NS   |
| A_44_P238927 | NM_001137642 | 362186 | Kif18a     | kinesin family member 18A                                                                                                   | 4.54E-02 | 1.8 | 6.70E-02 | NS   | 5.46E-02 | NS   |



|              |              |        |            |                                                                                |          |     |          |     |          |      |
|--------------|--------------|--------|------------|--------------------------------------------------------------------------------|----------|-----|----------|-----|----------|------|
| A_64_P041069 | NM_001127485 | 310775 | RGD1306520 | similar to receptor-interacting factor 1                                       | 4.45E-02 | 1.8 | 7.30E-01 | NS  | 5.25E-03 | -1.5 |
| A_44_P878617 | NM_001108742 | 362861 | Slc41a2    | solute carrier family 41, member 2                                             | 3.77E-02 | 1.8 | 2.89E-01 | NS  | 2.25E-01 | NS   |
| A_64_P165521 | NM_001106531 | 296290 | Bpil1      | bactericidal/permeability-increasing protein-like 1                            | 4.49E-02 | 1.8 | 4.11E-01 | NS  | 5.09E-01 | NS   |
| A_44_P836742 | NM_573124    | 497937 | Tmem102    | transmembrane protein 102                                                      | 1.83E-02 | 1.8 | 1.22E-01 | NS  | 1.05E-01 | NS   |
| A_44_P125710 | NM_173152    | 286937 | Pex5l      | peroxisomal biogenesis factor 5-like                                           | 5.53E-03 | 1.8 | 1.06E-01 | NS  | 1.17E-01 | NS   |
| A_42_P559414 | NM_053402    | 84426  | Wnt4       | wingless-type MMTV integration site family, member 4                           | 7.18E-03 | 1.8 | 5.50E-03 | 1.3 | 4.66E-01 | NS   |
| A_42_P708181 | NM_001107140 | 304477 | Kntc1      | kinetochore associated 1                                                       | 3.43E-03 | 1.8 | 6.60E-02 | NS  | 2.09E-01 | NS   |
| A_64_P047542 | NM_001034151 | 362605 | Tmem54     | transmembrane protein 54                                                       | 9.41E-03 | 1.8 | 1.94E-01 | NS  | 7.65E-01 | NS   |
| A_64_P005987 | NM_001107131 | 304375 | Agfg2      | ArfGAP with FG repeats 2                                                       | 3.91E-02 | 1.8 | 3.98E-02 | 1.3 | 4.15E-02 | -2.0 |
| A_43_P12299  | NM_022692    | 64633  | Rab5a      | RAB5A, member RAS oncogene family                                              | 4.40E-02 | 1.8 | 4.18E-01 | NS  | 4.50E-01 | NS   |
| A_44_P146753 | NM_001000128 | 293198 | Olr39      | olfactory receptor 39                                                          | 3.13E-03 | 1.8 | 6.02E-01 | NS  | 3.26E-01 | NS   |
| A_64_P118602 | NM_001057789 | 362288 | Rtel1      | regulator of telomere elongation helicase 1                                    | 2.93E-02 | 1.8 | 9.10E-01 | NS  | 1.81E-01 | NS   |
| A_44_P205572 | NM_012915    | 25392  | Atpif1     | ATPase inhibitory factor 1                                                     | 3.77E-02 | 1.8 | 3.39E-02 | 1.3 | 1.81E-02 | -1.7 |
| A_64_P076108 | XR_086144    | 688542 | LOC688542  | carboxylesterase 5-like                                                        | 1.76E-02 | 1.8 | 7.12E-01 | NS  | 2.93E-02 | -1.6 |
| A_64_P058103 | NM_001012466 | 303729 | Enpp7      | pyrophosphatase/phosphodiesterase 7                                            | 1.55E-02 | 1.8 | 7.92E-01 | NS  | 3.28E-01 | NS   |
| A_64_P030559 | NM_053761    | 114636 | Zyx        | zyxin                                                                          | 2.02E-02 | 1.8 | 1.13E-01 | NS  | 1.94E-01 | NS   |
| A_64_P021980 | NM_013036    | 25555  | Sstr4      | somatostatin receptor 4                                                        | 1.47E-02 | 1.8 | 1.27E-01 | NS  | 1.30E-01 | NS   |
| A_42_P748891 | NM_001013974 | 303606 | Ccdc47     | coiled-coil domain containing 47                                               | 2.79E-02 | 1.8 | 1.39E-01 | NS  | 6.65E-01 | NS   |
| A_64_P021456 | NM_199376    | 291673 | Sil1       | SIL1 homolog, endoplasmic reticulum chaperone (S. cerevisiae)                  | 1.31E-02 | 1.8 | 2.58E-02 | 1.2 | 3.46E-02 | -2.1 |
| A_64_P007518 | NM_001134519 | 298366 | Ttc39a     | tetratricopeptide repeat domain 39A                                            | 1.36E-02 | 1.8 | 1.65E-01 | NS  | 2.60E-03 | -1.8 |
| A_64_P130201 | NM_031982    | 83810  | Trpv1      | transient receptor potential cation channel, subfamily V, member 1             | 1.51E-02 | 1.8 | 8.59E-01 | NS  | 9.04E-01 | NS   |
| A_64_P165046 | NM_001072524 | 292947 | RGD1309903 | similar to mKIAA1244 protein                                                   | 8.04E-03 | 1.8 | 4.66E-01 | NS  | 3.51E-02 | -2.3 |
| A_64_P100853 | NM_001106351 | 293925 | RGD1564599 | similar to mKIAA1244 protein                                                   | 3.97E-02 | 1.8 | 7.65E-02 | NS  | 3.48E-01 | NS   |
| A_64_P062248 | NM_001107667 | 310315 | Ccdc39     | coiled-coil domain containing 39                                               | 2.79E-02 | 1.8 | 9.96E-01 | NS  | 2.29E-01 | NS   |
| A_64_P006748 | NM_001000435 | 300524 | Olr1196    | olfactory receptor 1196                                                        | 4.81E-02 | 1.8 | 8.06E-01 | NS  | 4.44E-01 | NS   |
| A_43_P12467  | NM_030871    | 81529  | Pde1a      | phosphodiesterase 1A, calmodulin-dependent                                     | 3.20E-02 | 1.8 | 5.08E-01 | NS  | 7.36E-03 | -1.9 |
| A_44_P526390 | NM_001108937 | 365684 | Paip1      | poly(A) binding protein interacting protein 1                                  | 3.75E-02 | 1.8 | 1.70E-01 | NS  | 1.60E-01 | NS   |
| A_64_P104538 | NM_001108172 | 315852 | Ttk        | Ttk protein kinase                                                             | 6.32E-03 | 1.8 | 1.71E-01 | NS  | 7.13E-02 | NS   |
| A_64_P058965 | NM_001037503 | 641626 | Defb13     | defensin beta 13                                                               | 3.93E-03 | 1.8 | 8.47E-01 | NS  | 4.74E-01 | NS   |
| A_64_P029008 | NM_198731    | 290551 | Chdh       | choline dehydrogenase                                                          | 2.71E-02 | 1.8 | 2.49E-01 | NS  | 7.92E-02 | NS   |
| A_42_P641393 | NM_001115042 | 684771 | Cdca5      | cell division cycle associated 5                                               | 3.68E-02 | 1.8 | 2.95E-02 | 1.4 | 4.92E-01 | NS   |
| A_64_P070296 | NM_001109502 | 688459 | LOC688459  | hypothetical protein LOC688459                                                 | 3.39E-02 | 1.8 | 2.34E-01 | NS  | 7.19E-02 | NS   |
| A_64_P081364 | NM_001079689 | 289032 | Chit1      | chitinase 1 (chitotriosidase)                                                  | 1.11E-02 | 1.8 | 5.78E-01 | NS  | 1.99E-01 | NS   |
| A_64_P151438 | NM_002725547 |        |            |                                                                                | 1.21E-02 | 1.8 | 2.82E-01 | NS  | 7.79E-02 | NS   |
| A_64_P044465 | NM_347067    |        |            |                                                                                | 3.45E-02 | 1.8 | 1.35E-01 | NS  | 4.89E-01 | NS   |
| A_64_P066023 | NM_001109102 | 498533 | Fam167a    | family with sequence similarity 167, member A                                  | 5.11E-03 | 1.8 | 8.40E-01 | NS  | 1.55E-01 | NS   |
| A_42_P588785 | NM_001109398 | 680308 | Mthfd2     | methylentetrahydrofolate dehydrogenase (NADP+ dependent) 2,                    | 1.47E-02 | 1.8 | 9.43E-04 | 1.6 | 8.23E-01 | NS   |
| A_64_P007462 | NM_002725190 |        |            | methylenetetrahydrofolate cyclohydrolase                                       | 7.92E-03 | 1.8 | 4.50E-01 | NS  | 2.53E-01 | NS   |
| A_64_P057481 | NM_001106788 | 300142 | Trabd      | TraB domain containing                                                         | 1.60E-02 | 1.8 | 6.96E-01 | NS  | 6.86E-03 | -1.5 |
| A_64_P009250 | NM_001000619 | 404811 | Olr727     | olfactory receptor 727                                                         | 4.22E-03 | 1.8 | 1.78E-01 | NS  | 9.14E-03 | -1.8 |
| A_64_P150156 | NM_080690    | 140722 | Caskin1    | CASK interacting protein 1                                                     | 8.99E-03 | 1.8 | 2.83E-02 | 1.2 | 1.31E-01 | NS   |
| A_44_P819401 | NM_133315    | 170840 | Slc40a1    | solute carrier family 39 (iron-regulated transporter), member 1                | 4.01E-02 | 1.8 | 4.13E-01 | NS  | 6.48E-01 | NS   |
| A_44_P415518 | NM_022232    | 63880  | Dnajc3     | DnaJ (Hsp40) homolog, subfamily C, member 3                                    | 7.21E-03 | 1.8 | 5.34E-04 | 1.5 | 1.01E-01 | NS   |
| A_44_P116904 | NM_001106109 | 291129 | Nrsn1      | neurensin 1                                                                    | 2.18E-02 | 1.8 | 4.95E-01 | NS  | 7.03E-02 | NS   |
| A_44_P239306 | NM_001013863 | 287938 | YdjC       | YdjC homolog (bacterial)                                                       | 3.56E-03 | 1.8 | 3.59E-01 | NS  | 4.25E-01 | NS   |
| A_44_P474101 | NM_013111    | 25648  | Slc7a1     | solute carrier family 7 (cationic amino acid transporter, y+ system), member 1 | 4.67E-02 | 1.8 | 4.39E-01 | NS  | 9.34E-02 | NS   |

|               |              |        |            |                                                                                 |          |     |          |      |          |      |
|---------------|--------------|--------|------------|---------------------------------------------------------------------------------|----------|-----|----------|------|----------|------|
| A_64_P050303  | NM_001009654 | 295661 | Spz25      | SPC25, NDC80 kinetochore complex component, homolog (S. cerevisiae)             | 2.04E-02 | 1.9 | 9.26E-02 | NS   | 1.72E-01 | NS   |
| A_64_P089400  | NM_022605    | 64537  | Hpse       | heparanase                                                                      | 1.27E-02 | 1.9 | 1.43E-01 | NS   | 4.64E-01 | NS   |
| A_64_P060125  | XM_227717    |        |            |                                                                                 | 4.72E-02 | 1.9 | 3.22E-01 | NS   | 9.49E-01 | NS   |
| A_64_P055002  | NM_199088    | 292890 | Tsks       | testis-specific serine kinase substrate                                         | 3.85E-03 | 1.9 | 3.90E-01 | NS   | 2.30E-01 | NS   |
| A_44_P550602  | XM_001080708 | 292902 | Slc6a16    | solute carrier family 6, member 16                                              | 2.06E-02 | 1.9 | 1.41E-01 | NS   | 8.31E-03 | -1.6 |
| A_64_P019676  | NM_001000157 | 293260 | Olr124     | olfactory receptor 124                                                          | 7.77E-03 | 1.9 | 6.06E-02 | NS   | 2.95E-02 | -1.3 |
| A_64_P001741  | NM_053702    | 114494 | Ccna2      | cyclin A2                                                                       | 3.93E-03 | 1.9 | 2.97E-02 | 1.3  | 7.27E-02 | NS   |
| A_64_P099715  | NM_001106538 | 296352 | Wfdc5      | WAP four-disulfide core domain 5                                                | 3.63E-02 | 1.9 | 7.56E-01 | NS   | 1.33E-01 | NS   |
| A_42_P843603  | NM_052800    | 24834  | Tk1        | thymidine kinase 1, soluble                                                     | 6.58E-03 | 1.9 | 1.27E-01 | NS   | 9.86E-02 | NS   |
| A_44_P184484  | NM_177931    | 313479 | Orc1l      | origin recognition complex, subunit 1-like (yeast)                              | 6.30E-03 | 1.9 | 3.29E-02 | 1.6  | 2.43E-01 | NS   |
| A_42_P576446  | NM_001107673 | 310392 | Slc7a11    | solute carrier family 7 (cationic amino acid transporter, y+ system), member 11 | 2.82E-02 | 1.9 | 1.07E-01 | NS   | 6.34E-01 | NS   |
| A_44_P370694  | NM_001107961 | 313512 | Dmbx1      | diencephalon/mesencephalon homeobox 1                                           | 3.12E-02 | 1.9 | 4.02E-01 | NS   | 4.73E-02 | -1.6 |
| A_42_P554157  | NM_001015021 | 360734 | Dnajb11    | DnaJ (Hsp40) homolog, subfamily B, member 11                                    | 2.64E-02 | 1.9 | 2.34E-02 | 1.4  | 9.05E-01 | NS   |
| A_64_P029048  | XM_001066421 | 293142 | Spzcs2     | signal peptidase complex subunit 2                                              | 4.17E-02 | 1.9 | 1.76E-01 | NS   | 4.49E-02 | -1.7 |
| A_44_P356407  | NM_001106069 | 290639 | Fcho1      | homolog (S. cerevisiae)                                                         | 8.49E-03 | 1.9 | 4.11E-01 | NS   | 5.72E-01 | NS   |
| A_44_P217875  | XM_001058477 | 306871 | Dsp        | FCH domain only 1                                                               | 6.06E-04 | 1.9 | 3.49E-04 | 1.4  | 4.28E-01 | NS   |
| A_43_P15072   | NM_001013060 | 291713 | Rit2       | desmoplakin                                                                     | 6.09E-03 | 1.9 | 7.00E-01 | NS   | 8.21E-01 | NS   |
| A_43_P10714   | XM_001053368 | 361348 | Mro        | Ras-like without CAAX 2                                                         | 4.38E-02 | 1.9 | 5.35E-03 | 1.3  | 2.31E-01 | NS   |
| A_64_P098081  | XR_006811    | 690148 | RGD1563516 | maestro                                                                         | 4.09E-02 | 1.9 | 1.53E-01 | NS   | 2.96E-01 | NS   |
| A_42_P555780  | XM_345342    | 362119 | C5         | similar to histone protein Hist2h3c1                                            | 4.48E-02 | 1.9 | 6.20E-03 | -1.7 | 1.30E-01 | NS   |
| A_44_P304220  | NM_053719    | 114511 | Emb        | complement component 5                                                          | 4.56E-02 | 1.9 | 5.44E-01 | NS   | 1.56E-01 | NS   |
| A_42_P579577  | NM_022608    | 64543  | Sec14i3    | embigin homolog (mouse)                                                         | 2.11E-02 | 1.9 | 2.88E-01 | NS   | 2.54E-01 | NS   |
| A_44_P213776  | NM_052829    | 84556  | Rims1      | SEC14-like 3 (S. cerevisiae)                                                    | 1.78E-02 | 1.9 | 3.55E-01 | NS   | 3.32E-01 | NS   |
| A_64_P109018  | NM_001172067 | 363618 | Hs3st3a1   | regulating synaptic membrane exocytosis 1                                       | 2.83E-02 | 1.9 | 2.80E-01 | NS   | 2.50E-01 | NS   |
| A_64_P071556  | NM_001134429 | 293702 | Fkbp2      | heparan sulfate (glucosamine) 3-O-sulfotransferase 3A1                          | 2.66E-02 | 1.9 | 9.22E-02 | NS   | 2.52E-02 | -2.0 |
| A_43_P12275   | NM_022635    | 64570  | Nat8       | FK506 binding protein 2                                                         | 4.11E-02 | 1.9 | 6.94E-02 | NS   | 1.34E-01 | NS   |
| A_44_P463749  | XM_001077321 | 64455  | Rasd1      | N-acetyltransferase 8                                                           | 1.88E-02 | 1.9 | 4.76E-01 | NS   | 3.16E-01 | NS   |
| A_44_P529240  | NM_183054    | 310625 | Rhbg       | RAS, dexamethasone-induced 1                                                    | 9.59E-04 | 1.9 | 4.65E-02 | 1.3  | 3.37E-01 | NS   |
| A_64_P092026  | NM_012863    | 25334  | Bhlha15    | Rh family, B glycoprotein                                                       | 3.70E-02 | 1.9 | 7.63E-01 | NS   | 8.65E-02 | NS   |
| A_64_P043392  | XM_001078620 | 691517 | Megf11     | basic helix-loop-helix family, member a15                                       | 4.77E-03 | 1.9 | 1.74E-02 | 1.8  | 4.61E-01 | NS   |
| A_44_P137448  | NM_017043    | 24693  | Ptgs1      | multiple EGF-like-domains 11                                                    | 3.55E-02 | 1.9 | 3.45E-03 | 1.3  | 2.02E-01 | NS   |
| A_43_P12258   | NM_022605    | 64537  | Hpse       | prostaglandin-endoperoxide synthase 1                                           | 3.18E-02 | 1.9 | 4.53E-02 | 1.3  | 6.35E-02 | NS   |
| A_43_P21779   | XM_001062907 | 366531 | Ttc39d     | heparanase                                                                      | 1.10E-03 | 1.9 | 9.31E-01 | NS   | 9.05E-01 | NS   |
| A_43_P10591   | NM_001025735 | 362479 | Tcea1      | tetratricopeptide repeat domain 39D                                             | 4.23E-02 | 1.9 | 9.83E-01 | NS   | 1.58E-02 | -1.6 |
| A_64_P163822  | NM_001126083 | 498709 | Cks2       | transcription elongation factor A (SII) 1                                       | 2.90E-02 | 1.9 | 2.82E-01 | NS   | 2.84E-01 | NS   |
| A_64_P022511  | NM_001170594 | 311327 | Casc5      | CDC28 protein kinase regulatory subunit 2                                       | 7.14E-03 | 1.9 | 8.55E-01 | NS   | 5.78E-01 | NS   |
| A_44_P304387  | NM_020076    | 56823  | Haoa       | cancer susceptibility candidate 5                                               | 3.28E-02 | 1.9 | 8.22E-01 | NS   | 5.98E-01 | NS   |
| A_43_P12718   | NM_032069    | 84016  | Grip1      | 3-hydroxyanthranilate 3,4-dioxygenase                                           | 3.09E-02 | 1.9 | 5.47E-01 | NS   | 4.52E-01 | NS   |
| A_42_P621514  | XM_002726351 |        |            | glutamate receptor interacting protein 1                                        | 1.21E-03 | 1.9 | 2.14E-01 | NS   | 2.89E-02 | -1.7 |
| A_42_P548796  | NM_021762    | 60381  | Tsn        | translin                                                                        | 4.87E-02 | 1.9 | 2.04E-02 | 1.2  | 4.77E-01 | NS   |
| A_43_P16967   | NM_001013085 | 297096 | Snx10      | sorting nexin 10                                                                | 1.20E-02 | 1.9 | 9.49E-01 | NS   | 3.63E-02 | -1.6 |
| A_64_P097922  | NM_001000662 | 404862 | Olr582     | oligofactin 10                                                                  | 6.86E-04 | 1.9 | 7.47E-01 | NS   | 7.81E-01 | NS   |
| A_64_P113802  | NM_001025740 | 362720 | Rrm2       | olifactory receptor 582                                                         | 8.21E-03 | 1.9 | 1.83E-02 | 1.5  | 3.18E-01 | NS   |
| A_64_P125147  | XM_238235    | 24641  | Flg        | ribonucleotide reductase M2                                                     | 4.03E-03 | 1.9 | 4.68E-01 | NS   | 5.05E-01 | NS   |
| A_43_P21680   | NM_001014001 | 306469 | RGD1307325 | filaggrin                                                                       | 3.49E-02 | 1.9 | 9.66E-01 | NS   | 3.42E-02 | -1.6 |
| A_64_P141564  | NM_001105861 | 287930 | Top3b      | similar to RIKEN cDNA 4933411K20                                                | 4.50E-02 | 1.9 | 2.20E-01 | NS   | 1.43E-01 | NS   |
| A_64_P005254  | XM_001071529 | 689656 | LOC689656  | topoisomerase (DNA) III beta                                                    | 1.49E-02 | 1.9 | 9.68E-02 | NS   | 4.66E-01 | NS   |
| A_44_P1010816 | NM_001106134 | 291441 | Ska1       | hypothetical protein LOC689656                                                  | 3.52E-02 | 1.9 | 1.68E-01 | NS   | 1.42E-01 | NS   |
| A_64_P062969  | NM_001014059 | 312711 | RGD1304952 | spindle and kinetochore associated complex subunit 1                            | 8.57E-03 | 1.9 | 6.13E-01 | NS   | 4.80E-01 | NS   |
| A_44_P115192  | NM_052983    | 114613 | Slc5a5     | similar to RIKEN cDNA C530028Q21 gene                                           | 5.65E-04 | 1.9 | 8.41E-01 | NS   | 2.37E-01 | NS   |
|               |              |        |            | solute carrier family 5 (sodium iodide symporter), member 5                     |          |     |          |      |          |      |

|               |              |        |            |                                                                                                   |          |     |          |      |          |      |
|---------------|--------------|--------|------------|---------------------------------------------------------------------------------------------------|----------|-----|----------|------|----------|------|
| A_42_P513050  | NM_001106375 | 294103 | Papss2     | 3'-phosphoadenosine 5'-phosphosulfate synthase 2                                                  | 4.55E-02 | 1.9 | 4.51E-03 | 1.2  | 7.24E-01 | NS   |
| A_44_P325863  | NM_053594    | 94202  | Ptprr      | protein tyrosine phosphatase, receptor type, R                                                    | 3.36E-02 | 1.9 | 6.87E-01 | NS   | 5.06E-02 | NS   |
| A_64_P161994  | NM_001033666 | 502674 | Dstn       | desmin                                                                                            | 4.04E-02 | 1.9 | 5.32E-02 | NS   | 3.52E-01 | NS   |
| A_64_P094793  | XM_001055690 | 680095 | LOC680095  | hypothetical protein LOC680095                                                                    | 3.61E-02 | 1.9 | 4.61E-01 | NS   | 2.26E-02 | -1.7 |
| A_64_P028556  | XM_001063746 |        |            |                                                                                                   | 7.06E-03 | 1.9 | 1.01E-01 | NS   | 1.24E-01 | NS   |
| A_44_P863259  | XR_008228    | 305681 | RGD1566399 | similar to MYST histone acetyltransferase monocytic leukemia 4                                    | 4.59E-02 | 1.9 | 9.62E-01 | NS   | 4.68E-02 | -1.4 |
| A_64_P013813  | NM_019135    | 25069  | Tnfrsf8    | tumor necrosis factor receptor superfamily, member 8                                              | 4.42E-03 | 1.9 | 2.88E-01 | NS   | 5.20E-01 | NS   |
| A_64_P084538  | NM_001108073 | 314640 | Tjp3       | tight junction protein 3                                                                          | 3.96E-02 | 1.9 | 7.12E-01 | NS   | 5.01E-02 | NS   |
| A_64_P104988  | NM_001130572 | 366953 | Nfkbil2    | nuclear factor of kappa light polypeptide gene enhancer in B-cells inhibitor-like 2               | 9.08E-03 | 1.9 | 1.34E-01 | NS   | 9.32E-01 | NS   |
| A_44_P974524  | NM_001025764 | 498933 | LOC498933  | LOC498933                                                                                         | 3.40E-02 | 1.9 | 2.91E-01 | NS   | 1.28E-01 | NS   |
| A_64_P112485  | NM_001037509 | 641633 | Defb9      | defensin beta 9                                                                                   | 1.39E-02 | 1.9 | 4.77E-01 | NS   | 6.55E-01 | NS   |
| A_64_P051430  | NM_183403    | 29326  | Gpx2       | glutathione peroxidase 2                                                                          | 4.82E-03 | 1.9 | 1.42E-01 | NS   | 2.72E-02 | -2.7 |
| A_44_P999115  | NM_001012216 | 365360 | Tmc5       | transmembrane channel-like 5                                                                      | 3.78E-02 | 1.9 | 1.09E-01 | NS   | 1.71E-01 | NS   |
| A_64_P107892  | NM_133527    | 171049 | Folr1      | folate receptor 1 (adult)                                                                         | 2.08E-02 | 1.9 | 8.48E-02 | NS   | 1.23E-01 | NS   |
| A_44_P1045354 | NM_199081    | 287642 | Slc35b1    | solute carrier family 35, member B1                                                               | 1.06E-02 | 1.9 | 1.20E-02 | 1.3  | 3.25E-01 | NS   |
| A_44_P449638  | NM_017279    | 29669  | Psma2      | proteasome (prosome, macropain) subunit, alpha type 2                                             | 3.13E-02 | 1.9 | 4.69E-03 | 1.6  | 8.43E-01 | NS   |
| A_44_P480379  | XM_001060717 | 305628 | Ccdc18     | coiled-coil domain containing 18                                                                  | 4.40E-02 | 1.9 | 9.26E-01 | NS   | 4.39E-01 | NS   |
| A_44_P257788  | NM_001106349 | 293894 | Tpd52l3    | tumor protein D52-like 3                                                                          | 2.30E-02 | 1.9 | 1.50E-01 | NS   | 3.43E-01 | NS   |
| A_44_P457203  | XM_215865    | 296198 | Banf2      | barrier to autointegration factor 2 poly(A)-specific ribonuclease (PARN)-like domain containing 1 | 1.27E-03 | 1.9 | 1.31E-02 | 1.5  | 7.84E-01 | NS   |
| A_43_P22983   | NM_001025724 | 361478 | Pnlcd1     | pancreatic lipase domain containing 1                                                             | 1.70E-02 | 1.9 | 3.18E-03 | 1.2  | 1.26E-01 | NS   |
| A_64_P149230  | XM_237757    |        |            |                                                                                                   | 1.06E-02 | 1.9 | 9.09E-01 | NS   | 1.93E-01 | NS   |
| A_42_P557394  | NM_001008510 | 293052 | Isg20      | interferon stimulated exonuclease gene 20                                                         | 3.79E-02 | 1.9 | 1.63E-01 | NS   | 9.98E-01 | NS   |
| A_64_P147878  | NM_001109450 | 684979 | Hs3st6     | heparan sulfate (glucosamine) 3-O-sulfotransferase 6                                              | 2.38E-02 | 1.9 | 3.90E-01 | NS   | 6.45E-02 | NS   |
| A_44_P637792  | NM_001013191 | 361391 | Cbfb       | core-binding factor, beta subunit                                                                 | 3.61E-02 | 2.0 | 4.93E-01 | NS   | 8.76E-01 | NS   |
| A_42_P689013  | NM_053800    | 116484 | Txn1       | thioredoxin 1                                                                                     | 4.59E-02 | 2.0 | 5.92E-02 | NS   | 1.20E-01 | NS   |
| A_64_P129413  | XM_343359    |        |            |                                                                                                   | 8.75E-03 | 2.0 | 1.48E-01 | NS   | 3.36E-01 | NS   |
| A_42_P529445  | NM_001106022 | 289864 | Ncrna00117 | non-protein coding RNA 117                                                                        | 1.60E-02 | 2.0 | 6.84E-01 | NS   | 9.74E-02 | NS   |
| A_44_P1025349 | NM_001106856 | 301000 | Uba7       | ubiquitin-like modifier activating enzyme 7                                                       | 6.47E-03 | 2.0 | 7.61E-02 | NS   | 6.79E-02 | NS   |
| A_64_P155201  | XR_006805    | 690126 | LOC690126  | hypothetical protein LOC690126                                                                    | 2.14E-02 | 2.0 | 5.59E-03 | -1.5 | 4.58E-02 | -1.5 |
| A_64_P056846  | NM_012815    | 25283  | Gclc       | glutamate-cysteine ligase, catalytic subunit                                                      | 2.83E-02 | 2.0 | 6.10E-03 | 1.4  | 4.44E-01 | NS   |
| A_43_P13554   | XM_001056437 | 680280 | Gas2l3     | growth arrest-specific 2 like 3                                                                   | 2.56E-02 | 2.0 | 1.77E-01 | NS   | 3.91E-01 | NS   |
| A_44_P471201  | NM_001106632 | 297783 | Mybl1      | myeloblastosis oncogene-like 1                                                                    | 1.83E-02 | 2.0 | 2.15E-01 | NS   | 7.66E-01 | NS   |
| A_44_P354229  | XM_228535    |        |            |                                                                                                   | 1.62E-02 | 2.0 | 9.95E-01 | NS   | 1.25E-01 | NS   |
| A_64_P138679  | XM_001080197 | 308190 | Cyp26c1    | cytochrome P450, family 26, subfamily C, polypeptide 1                                            | 3.20E-02 | 2.0 | 2.27E-01 | NS   | 8.71E-02 | NS   |
| A_64_P052555  | XM_001062242 | 685087 | LOC685087  | hypothetical protein LOC685087                                                                    | 3.48E-02 | 2.0 | 6.32E-01 | NS   | 1.12E-02 | -1.7 |
| A_44_P728540  | NM_001134609 | 499068 | Zfp583     | zinc finger protein 583                                                                           | 4.84E-03 | 2.0 | 2.85E-01 | NS   | 4.97E-02 | -1.3 |
| A_64_P052665  | NM_001108298 | 360621 | Cdc6       | cell division cycle 6 homolog (S. cerevisiae)                                                     | 2.85E-03 | 2.0 | 3.88E-01 | NS   | 5.61E-01 | NS   |
| A_64_P114019  | NM_001008891 | 361233 | Ssr1       | signal sequence receptor, alpha                                                                   | 4.60E-02 | 2.0 | 9.08E-02 | NS   | 7.79E-01 | NS   |
| A_64_P064254  | XM_001080900 | 363648 | RGD1562534 | protein 4 precursor (IGFBP-4)                                                                     | 1.18E-02 | 2.0 | 3.42E-01 | NS   | 5.71E-01 | NS   |
| A_64_P035544  | NM_001105943 | 288905 | Il27ra     | interleukin 27 receptor, alpha                                                                    | 1.82E-02 | 2.0 | 1.14E-01 | NS   | 4.98E-01 | NS   |
| A_64_P028551  | NM_001008318 | 298748 | RGD1311578 | similar to PRO1853 homolog corticotropin releasing hormone binding protein                        | 2.17E-02 | 2.0 | 9.08E-01 | NS   | 4.23E-01 | NS   |
| A_44_P104054  | NM_139183    | 29625  | Crhbp      | protein                                                                                           | 1.02E-03 | 2.0 | 3.66E-01 | NS   | 2.88E-01 | NS   |
| A_64_P084088  | NM_001011954 | 295669 | Cybrd1     | cytochrome b reductase 1                                                                          | 2.64E-02 | 2.0 | 9.33E-03 | 1.2  | 8.41E-02 | NS   |
| A_44_P1013851 | NM_017178    | 29373  | Bmp2       | bone morphogenetic protein 2                                                                      | 1.92E-03 | 2.0 | 1.61E-01 | NS   | 3.63E-02 | -1.6 |
| A_64_P115566  | NM_001107943 | 313339 | Acer2      | alkaline ceramidase 2                                                                             | 1.65E-02 | 2.0 | 1.02E-01 | NS   | 4.78E-01 | NS   |
| A_44_P638638  | NM_001109547 | 689711 | Fam101a    | family with sequence similarity 101, member A                                                     | 5.59E-03 | 2.0 | 5.87E-01 | NS   | 9.02E-01 | NS   |

|              |              |        |            |                                                                                             |          |     |          |     |          |      |
|--------------|--------------|--------|------------|---------------------------------------------------------------------------------------------|----------|-----|----------|-----|----------|------|
| A_64_P097779 | XM_001065485 |        |            | heat shock protein 90kDa beta (Grp94), member 1                                             | 2.54E-02 | 2.0 | 2.84E-01 | NS  | 1.87E-01 | NS   |
| A_43_P15719  | NM_001012197 | 362862 | Hsp90b1    |                                                                                             | 3.57E-02 | 2.0 | 1.46E-01 | NS  | 1.43E-01 | NS   |
| A_64_P062285 | NM_001134788 | 363830 | Vpreb2     | pre-B lymphocyte gene 2                                                                     | 3.37E-02 | 2.0 | 6.73E-01 | NS  | 7.75E-01 | NS   |
| A_64_P005396 | NM_001000061 | 288818 | Olr889     | olfactory receptor 889                                                                      | 7.91E-03 | 2.0 | 4.47E-01 | NS  | 4.12E-02 | -2.1 |
| A_44_P411097 | NM_012738    | 25081  | Apoa1      | apolipoprotein A-I                                                                          | 2.72E-02 | 2.0 | 5.93E-01 | NS  | 5.99E-01 | NS   |
| A_64_P048526 | NM_017301    | 29733  | S1pr1      | sphingosine-1-phosphate receptor 1                                                          | 4.23E-02 | 2.0 | 6.76E-01 | NS  | 7.10E-01 | NS   |
| A_44_P510738 | NM_012723    | 25046  | Pigr       | polymeric immunoglobulin receptor                                                           | 4.85E-02 | 2.0 | 8.14E-02 | NS  | 2.32E-01 | NS   |
| A_44_P269675 | XM_001065605 |        |            |                                                                                             | 2.20E-02 | 2.0 | 1.18E-01 | NS  | 9.69E-02 | NS   |
| A_44_P347149 | NM_001100963 | 296925 | Aass       | aminoadipate-semialdehyde synthase similar to Alpha-1-antitrypsin-related protein precursor | 6.32E-04 | 2.0 | 5.01E-05 | 1.8 | 2.29E-01 | NS   |
| A_64_P101956 | XM_001074053 | 690311 | LOC690311  |                                                                                             | 2.73E-02 | 2.0 | 3.62E-01 | NS  | 2.46E-01 | NS   |
| A_44_P654498 | NM_001109502 | 688459 | LOC688459  | hypothetical protein LOC688459                                                              | 3.38E-02 | 2.0 | 7.25E-01 | NS  | 2.39E-02 | -1.8 |
| A_64_P014544 | NM_057135    | 117276 | Pfkfb3     | 6-phosphofructo-2-kinase/fructose-2,6-biphosphatase 3                                       | 3.91E-02 | 2.0 | 7.57E-01 | NS  | 2.67E-01 | NS   |
| A_64_P044752 | XM_001076394 | 316022 | Trank1     | tetratricopeptide repeat and ankyrin repeat containing 1                                    | 3.36E-02 | 2.0 | 5.91E-01 | NS  | 4.57E-01 | NS   |
| A_42_P495001 | NM_001009713 | 363103 | Slc17a5    | solute carrier family 17 (anion/sugar transporter), member 5                                | 4.18E-02 | 2.0 | 6.21E-02 | NS  | 4.40E-02 | -1.5 |
| A_64_P104009 | NM_001025740 | 362720 | Rrm2       | ribonucleotide reductase M2                                                                 | 1.40E-02 | 2.0 | 1.19E-01 | NS  | 1.73E-01 | NS   |
| A_64_P097243 | NM_001145175 | 691429 | Shisa7     | shisa homolog 7 (Xenopus laevis)                                                            | 3.46E-02 | 2.0 | 9.24E-01 | NS  | 1.22E-01 | NS   |
| A_42_P723173 | NM_012797    | 25261  | Id1        | inhibitor of DNA binding 1                                                                  | 4.74E-02 | 2.0 | 3.65E-03 | 1.4 | 1.71E-01 | NS   |
| A_43_P12559  | NM_031338    | 83506  | Camkk2     | calcium/calmodulin-dependent protein kinase kinase 2, beta                                  | 3.40E-02 | 2.0 | 4.67E-01 | NS  | 3.68E-02 | -1.5 |
| A_64_P138949 | NM_001110365 | 682507 | Wasl       | Wiskott-Aldrich syndrome-like                                                               | 4.08E-02 | 2.0 | 8.55E-01 | NS  | 7.96E-04 | -1.7 |
| A_44_P123887 | NM_001037185 | 295107 | Smc4       | structural maintenance of chromosomes 4                                                     | 4.21E-02 | 2.0 | 1.70E-01 | NS  | 8.67E-01 | NS   |
| A_44_P379377 | NM_053348    | 83928  | Fetub      | fetuin B                                                                                    | 7.77E-03 | 2.0 | 6.70E-01 | NS  | 1.32E-01 | NS   |
| A_44_P403532 | XM_001078585 | 499783 | RGD1564019 | similar to GTPase activating RANGAP domain-like 3                                           | 4.68E-02 | 2.0 | 6.45E-01 | NS  | 2.96E-01 | NS   |
| A_44_P992697 | NM_001107739 | 311151 | Dusp19     | dual specificity phosphatase 19                                                             | 4.13E-02 | 2.0 | 1.03E-01 | NS  | 2.86E-01 | NS   |
| A_64_P003621 | NM_001047927 | 498308 | LOC498308  | Da2-20                                                                                      | 1.77E-02 | 2.0 | 3.35E-01 | NS  | 5.56E-01 | NS   |
| A_64_P078914 | XM_001080765 | 499867 | Phgr1      | proline/histidine/glycine-rich 1                                                            | 2.77E-03 | 2.0 | 6.41E-02 | NS  | 6.47E-01 | NS   |
| A_64_P397198 | NM_001135780 | 313108 | RGD1304693 | similar to CG14803-PA                                                                       | 1.73E-02 | 2.0 | 2.29E-01 | NS  | 6.14E-01 | NS   |
| A_44_P363009 | NM_198748    | 298975 | Scin       | scinderin                                                                                   | 1.44E-02 | 2.0 | 1.32E-01 | NS  | 7.08E-01 | NS   |
| A_64_P011070 | NM_022234    | 63882  | Accn4      | amiloride-sensitive cation channel 4, pituitary                                             | 3.95E-02 | 2.0 | 7.25E-01 | NS  | 3.44E-04 | -2.7 |
| A_64_P080002 | NM_001135749 | 499655 | Cks1b      | CDC28 protein kinase regulatory subunit 1B                                                  | 4.76E-02 | 2.0 | 2.79E-01 | NS  | 2.48E-01 | NS   |
| A_44_P267778 | NM_001107030 | 303376 | Fndc8      | fibronectin type III domain containing 8                                                    | 3.67E-02 | 2.0 | 6.16E-01 | NS  | 1.93E-01 | NS   |
| A_64_P125305 | NM_001107494 | 308443 | B9d2       | B9 protein domain 2                                                                         | 2.99E-03 | 2.0 | 8.21E-01 | NS  | 4.04E-01 | NS   |
| A_64_P059645 | NM_001033665 | 25393  | Bcan       | brevican                                                                                    | 4.75E-03 | 2.0 | 2.20E-01 | NS  | 1.03E-01 | NS   |
| A_44_P947743 | XM_218313    | 308376 | Gpr126     | G protein-coupled receptor 126                                                              | 1.96E-02 | 2.0 | 2.45E-01 | NS  | 2.84E-02 | -1.7 |
| A_44_P593161 | NM_001013151 | 309242 | Gna14      | 14                                                                                          | 4.62E-02 | 2.1 | 1.19E-02 | 1.3 | 8.84E-02 | NS   |
| A_44_P461383 | XM_001059752 | 295090 | Vom2r45    | vomeroneasal 2 receptor, 45                                                                 | 4.86E-02 | 2.1 | 5.71E-01 | NS  | 9.91E-02 | NS   |
| A_64_P137042 | NM_012614    | 24604  | Npy        | neuropeptide Y                                                                              | 1.13E-02 | 2.1 | 2.38E-01 | NS  | 2.16E-01 | NS   |
| A_64_P103590 | XR_008568    |        |            |                                                                                             | 8.96E-04 | 2.1 | 3.99E-01 | NS  | 1.79E-02 | 2.2  |
| A_64_P132576 | NM_001012357 | 360579 | Ccl9       | chemokine (C-C motif) ligand 9                                                              | 1.97E-02 | 2.1 | 3.02E-01 | NS  | 7.17E-01 | NS   |
| A_44_P289637 | NM_012651    | 24779  | Slc4a1     | solute carrier family 4 (anion exchanger), member 1                                         | 5.93E-03 | 2.1 | 1.72E-01 | NS  | 1.02E-01 | NS   |
| A_64_P116819 | NM_001106553 | 296511 | Alx4       | ALX homeobox 4                                                                              | 1.70E-02 | 2.1 | 3.12E-01 | NS  | 2.33E-01 | NS   |
| A_64_P133167 | XM_001080999 | 499879 | Duoxa2     | dual oxidase maturation factor 2                                                            | 4.78E-02 | 2.1 | 3.38E-01 | NS  | 1.51E-01 | NS   |
| A_64_P123341 | NM_147212    | 259244 | LOC259244  | alpha-2u globulin PGCL3                                                                     | 4.19E-03 | 2.1 | 8.87E-01 | NS  | 5.36E-01 | NS   |
| A_64_P091747 | NM_019363    | 54349  | Aox1       | aldehyde oxidase 1                                                                          | 7.01E-03 | 2.1 | 7.81E-02 | NS  | 8.82E-01 | NS   |
| A_64_P138011 | NM_016991    | 24173  | Adra1b     | adrenergic, alpha-1B-, receptor                                                             | 1.17E-02 | 2.1 | 6.14E-01 | NS  | 6.25E-01 | NS   |
| A_42_P493380 | NM_012603    | 24577  | Myc        | myelocytomatosis oncogene                                                                   | 4.07E-02 | 2.1 | 8.32E-01 | NS  | 6.18E-01 | NS   |
| A_44_P103337 | NM_001013861 | 287741 | RGD1307851 | similar to RIKEN cDNA 4933439F11                                                            | 1.64E-02 | 2.1 | 5.55E-01 | NS  | 4.80E-01 | NS   |
| A_64_P070591 | NM_001106655 | 298071 | Nans       | N-acetylneuraminic acid synthase                                                            | 1.90E-02 | 2.1 | 4.49E-02 | 1.2 | 1.32E-01 | NS   |
| A_64_P134053 | NM_053968    | 117038 | Mt3        | metallothionein 3                                                                           | 2.01E-02 | 2.1 | 7.17E-02 | NS  | 7.78E-02 | NS   |
| A_44_P620895 | NM_001024329 | 500124 | LOC500124  | similar to RIKEN cDNA 4921507P07                                                            | 2.52E-02 | 2.1 | 9.13E-03 | 1.7 | 1.92E-01 | NS   |

|               |              |        |            |                                                               |          |     |          |      |          |      |
|---------------|--------------|--------|------------|---------------------------------------------------------------|----------|-----|----------|------|----------|------|
| A_42_P684295  | NM_057121    | 117261 | Slc15a1    | solute carrier family 15 (oligopeptide transporter), member 1 | 3.25E-02 | 2.1 | 7.40E-02 | NS   | 3.93E-01 | NS   |
| A_43_P20976   | XM_001054970 | 362295 | Lmbr1      | limb region 1 homolog (mouse)                                 | 2.61E-02 | 2.1 | 5.62E-01 | NS   | 8.99E-02 | NS   |
| A_44_P445044  | NM_001003403 | 444983 | Apold1     | apolipoprotein L domain containing 1                          | 3.80E-02 | 2.1 | 6.23E-01 | NS   | 6.80E-01 | NS   |
| A_64_P078303  | NM_001106526 | 296269 | Angpt4     | angiopoietin 4                                                | 3.07E-02 | 2.1 | 6.35E-01 | NS   | 9.99E-01 | NS   |
| A_64_P097380  | NM_133426    | 171011 | Kcng3      | potassium voltage-gated channel, subfamily G, member 3        | 5.64E-03 | 2.1 | 6.68E-01 | NS   | 3.87E-01 | NS   |
| A_64_P147644  | NM_013045    | 25567  | Tnr        | tenascin R                                                    | 2.11E-02 | 2.1 | 8.51E-01 | NS   | 6.93E-02 | NS   |
| A_64_P035031  | NM_001099505 | 301154 | Vom2r76    | vomeroneasal 2 receptor, 76                                   | 2.68E-04 | 2.1 | 7.11E-01 | NS   | 8.39E-02 | NS   |
| A_64_P035371  | XM_001056897 | 681740 | LOC681740  | similar to jumonji protein                                    | 1.64E-02 | 2.1 | 7.57E-01 | NS   | 7.96E-01 | NS   |
| A_42_P542809  | NM_021671    | 59303  | Tmem33     | transmembrane protein 33                                      | 2.55E-02 | 2.1 | 3.48E-01 | NS   | 6.45E-02 | NS   |
| A_44_P203859  | BE106644     |        |            |                                                               | 3.11E-02 | 2.1 | 5.60E-01 | NS   | 4.26E-03 | -2.0 |
| A_64_P147674  | NM_021693    | 59329  | Sik1       | salt-inducible kinase 1                                       | 6.40E-04 | 2.1 | 9.02E-01 | NS   | 5.99E-02 | NS   |
| A_44_P203411  | NM_053917    | 116699 | Inpp4b     | inositol polyphosphate-4-phosphatase, type II                 | 4.99E-02 | 2.1 | 1.44E-01 | NS   | 6.39E-01 | NS   |
| A_64_P045516  | XR_006055    | 685577 | LOC685577  | similar to major urinary protein 5                            | 2.11E-02 | 2.1 | 8.53E-01 | NS   | 5.06E-01 | NS   |
| A_64_P117171  | NM_001109548 | 689755 | LOC689755  | hypothetical protein LOC689755                                | 6.58E-03 | 2.1 | 6.38E-03 | 1.4  | 1.46E-01 | NS   |
| A_64_P028585  | NM_001012233 | 497196 | NMS        | neuromedin S                                                  | 4.17E-03 | 2.2 | 1.57E-01 | NS   | 9.35E-02 | NS   |
| A_44_P112527  | XM_001078620 | 691521 | LOC691521  | similar to MEGF11 protein                                     | 1.24E-02 | 2.2 | 1.09E-02 | 2.3  | 4.67E-01 | NS   |
| A_64_P007092  | XM_237488    |        |            |                                                               | 8.37E-04 | 2.2 | 5.00E-01 | NS   | 1.63E-01 | NS   |
| A_64_P121991  | NM_012877    | 25349  | Scn2b      | sodium channel, voltage-gated, type II, beta                  | 3.63E-03 | 2.2 | 4.73E-01 | NS   | 7.06E-01 | NS   |
| A_44_P281393  | XM_344684    |        |            |                                                               | 4.13E-02 | 2.2 | 3.29E-02 | 1.5  | 7.09E-02 | NS   |
| A_44_P1054213 | NM_013083    | 25617  | Hspa5      | heat shock protein 5                                          | 7.93E-03 | 2.2 | 7.81E-03 | 1.4  | 2.42E-01 | NS   |
| A_44_P352538  | NM_001013043 | 287885 | Sectm1a    | secreted and transmembrane 1A                                 | 2.93E-02 | 2.2 | 9.28E-02 | NS   | 1.81E-01 | NS   |
| A_64_P081232  | NM_001108580 | 362113 | Pthr1      | peptidyl-tRNA hydrolase 1 homolog (S. cerevisiae)             | 2.79E-02 | 2.2 | 6.63E-02 | NS   | 5.96E-02 | NS   |
| A_64_P166501  | NM_0166501   | 25466  | Il1rap     | interleukin 1 receptor accessory protein                      | 2.99E-02 | 2.2 | 9.55E-01 | NS   | 5.87E-01 | NS   |
| A_64_P113079  | XR_007928    |        |            |                                                               | 4.52E-02 | 2.2 | 2.24E-01 | NS   | 1.33E-04 | -2.8 |
| A_43_P16457   | NM_001037208 | 362978 | Creld2     | cysteine-rich with EGF-like domains 2                         | 7.68E-04 | 2.2 | 2.38E-03 | 2.1  | 9.12E-01 | NS   |
| A_64_P087479  | NM_147215    | 259247 | Obp3       | alpha-2u globulin PGCL4                                       | 3.02E-03 | 2.2 | 4.94E-01 | NS   | 5.48E-01 | NS   |
| A_64_P074480  | XM_001059495 | 680927 | LOC680927  | hypothetical protein LOC680927                                | 2.84E-03 | 2.2 | 4.30E-01 | NS   | 1.94E-01 | NS   |
| A_64_P017662  | XM_346212    |        |            |                                                               | 3.68E-02 | 2.2 | 1.41E-01 | NS   | 2.23E-02 | -2.6 |
| A_64_P054900  | XM_001055294 | 291652 | Pcdhb7     | protocadherin beta 7                                          | 1.30E-02 | 2.2 | 3.19E-01 | NS   | 9.12E-01 | NS   |
| A_64_P141787  | XM_001076368 | 498352 | Pdcl2      | phosducin-like 2                                              | 5.11E-03 | 2.2 | 4.64E-01 | NS   | 5.46E-01 | NS   |
| A_64_P088146  | NM_001004097 | 408247 | Try10      | trypsin 10                                                    | 1.24E-03 | 2.2 | 2.71E-01 | NS   | 5.15E-01 | NS   |
| A_64_P043140  | NM_001109633 | 691277 | LOC691277  | similar to Robo-1                                             | 3.87E-02 | 2.2 | 6.08E-01 | NS   | 3.12E-01 | NS   |
| A_64_P117653  | NM_203325    | 298107 | Mup5       | major urinary protein 5                                       | 9.52E-03 | 2.2 | 8.38E-01 | NS   | 8.98E-01 | NS   |
| A_44_P493956  | NM_053849    | 116598 | Pdia4      | protein disulfide isomerase family A, member 4                | 1.65E-03 | 2.2 | 8.44E-03 | 1.5  | 2.56E-01 | NS   |
| A_44_P424723  | AF106937     | 59329  | Sik1       | salt-inducible kinase 1                                       | 8.76E-03 | 2.2 | 3.59E-01 | NS   | 8.24E-01 | NS   |
| A_64_P047266  | XM_001072885 | 499520 | Fam159b    | family with sequence similarity 159, member B                 | 2.22E-02 | 2.2 | 4.05E-01 | NS   | 8.77E-01 | NS   |
| A_64_P039818  | XM_001072885 | 84394  | Dcx        | doublecortin                                                  | 1.47E-02 | 2.2 | 6.56E-01 | NS   | 3.77E-01 | NS   |
| A_64_P131915  | XM_001064819 | 685685 | LOC685685  | similar to S100 calcium-binding protein, ventral prostate     | 4.76E-02 | 2.2 | 5.06E-01 | NS   | 2.80E-01 | NS   |
| A_64_P149689  | NM_001014114 | 360459 | RGD1305733 | similar to RIKEN cDNA 2900011O08                              | 2.37E-02 | 2.2 | 8.88E-01 | NS   | 3.42E-01 | NS   |
| A_64_P060608  | XM_001068783 | 688909 | LOC688909  | hypothetical protein LOC688909                                | 1.82E-02 | 2.3 | 5.54E-01 | NS   | 5.99E-01 | NS   |
| A_43_P16262   | NM_173321    | 286987 | LOC286987  | hemiferrin, transferrin-like protein                          | 1.09E-03 | 2.3 | 3.58E-02 | -1.8 | 1.28E-01 | NS   |
| A_43_P10280   | NM_001112742 | 29628  | Gria3      | glutamate receptor, ionotropic, AMPA 3                        | 4.30E-02 | 2.3 | 2.94E-01 | NS   | 2.01E-02 | -2.9 |
| A_44_P506273  | NM_001170346 | 290729 | Neil3      | nei endonuclease VIII-like 3 (E. coli)                        | 4.82E-02 | 2.3 | 6.16E-01 | NS   | 2.59E-01 | NS   |
| A_64_P120640  | NM_053595    | 94203  | Pgf        | placental growth factor                                       | 1.98E-02 | 2.3 | 1.01E-01 | NS   | 6.13E-01 | NS   |
| A_64_P127855  | NM_053440    | 84510  | Stmn2      | stathmin-like 2                                               | 2.67E-02 | 2.3 | 2.25E-01 | NS   | 5.89E-01 | NS   |
| A_64_P097547  | NM_001100528 | 295953 | Rag2       | recombination activating gene 2                               | 2.49E-02 | 2.3 | 2.97E-01 | NS   | 8.24E-01 | NS   |
| A_64_P140545  | NM_001107112 | 304125 | Cldn17     | claudin 17                                                    | 1.41E-02 | 2.3 | 4.17E-01 | NS   | 8.87E-01 | NS   |
| A_44_P428739  | NM_001105743 | 114858 | Shc3       | SHC (Src homology 2 domain containing) transforming protein 3 | 8.49E-03 | 2.3 | 1.35E-02 | 1.3  | 2.43E-01 | NS   |
| A_64_P136407  | XM_001055336 |        |            |                                                               | 1.91E-02 | 2.3 | 4.70E-01 | NS   | 6.44E-01 | NS   |
| A_42_P559831  | NM_017004    | 24346  | Es1        | esterase 1                                                    | 1.99E-02 | 2.3 | 9.88E-03 | 1.6  | 2.26E-01 | NS   |
| A_64_P038639  | FM119812     |        |            |                                                               | 1.43E-03 | 2.3 | 7.94E-01 | NS   | 4.30E-01 | NS   |

|               |              |        |            |                                                                                                    |          |     |          |      |          |      |
|---------------|--------------|--------|------------|----------------------------------------------------------------------------------------------------|----------|-----|----------|------|----------|------|
| A_64_P064976  | NM_001106939 | 302377 | RGD1560455 | similar to RIKEN cDNA A630033H20 gene                                                              | 1.70E-03 | 2.3 | 4.77E-02 | 1.7  | 1.37E-01 | NS   |
| A_64_P048834  | NM_001080939 | 690572 | Tas2r109   | taste receptor, type 2, member 109                                                                 | 1.35E-02 | 2.3 | 4.12E-01 | NS   | 3.62E-01 | NS   |
| A_44_P213149  | NM_001107369 | 307169 | Mastl      | kinase-like                                                                                        | 1.28E-02 | 2.3 | 5.20E-03 | 1.6  | 3.19E-02 | 2.3  |
| A_64_P133114  | XM_580047    | 500074 | RGD1562026 | microtubule associated serine/threonine heat shock protein 90, alpha (cytosolic), class A member 1 | 1.71E-02 | 2.3 | 5.41E-01 | NS   | 6.79E-01 | NS   |
| A_44_P299870  | NM_175761    | 299331 | Hsp90aa1   | class A member 1                                                                                   | 2.26E-02 | 2.3 | 2.64E-01 | NS   | 6.41E-02 | NS   |
| A_64_P097332  | NM_001008922 | 494271 | Vom1r73    | vomeronasal 1 receptor, 73                                                                         | 1.32E-03 | 2.3 | 1.25E-01 | NS   | 5.05E-01 | NS   |
| A_64_P038312  | NM_031038    | 81668  | Gnrhr      | gonadotropin releasing hormone receptor                                                            | 1.92E-02 | 2.3 | 1.78E-01 | NS   | 2.80E-01 | NS   |
| A_44_P203401  | NM_001079898 | 498659 | RatNP-3b   | defensin RatNP-3 precursor                                                                         | 4.00E-02 | 2.3 | 4.09E-01 | NS   | 6.79E-01 | NS   |
| A_64_P062462  | NM_001009474 | 363465 | Pir        | pirin (iron-binding nuclear protein)                                                               | 1.96E-02 | 2.3 | 1.78E-02 | 1.4  | 8.84E-01 | NS   |
| A_64_P071800  | NM_001025021 | 362526 | LOC362526  | hypothetical protein LOC362526                                                                     | 2.68E-02 | 2.3 | 3.04E-02 | 1.3  | 4.02E-02 | -1.9 |
| A_44_P309266  | NM_001079937 | 290326 | Pbk        | PDZ binding kinase                                                                                 | 3.15E-03 | 2.3 | 4.21E-02 | 1.4  | 2.40E-01 | NS   |
| A_64_P066868  | XM_001067914 |        |            |                                                                                                    | 2.75E-02 | 2.4 | 7.10E-01 | NS   | 5.11E-02 | NS   |
| A_42_P536741  | NM_001109577 | 690315 | Derl3      | Der1-like domain family, member 3 solute carrier family 14 (urea transporter), member 2            | 6.97E-04 | 2.4 | 2.76E-03 | 1.5  | 1.46E-01 | NS   |
| A_43_P12032   | NM_019347    | 54302  | Slc14a2    | member 2                                                                                           | 3.62E-02 | 2.4 | 2.64E-01 | NS   | 8.25E-03 | -2.0 |
| A_43_P11333   | NM_138867    | 192235 | Hyou1      | hypoxia up-regulated 1                                                                             | 8.35E-03 | 2.4 | 9.43E-03 | 1.4  | 7.27E-02 | NS   |
| A_44_P354078  | NM_001106113 | 291145 | Hist1h1a   | histone cluster 1, H1a                                                                             | 2.09E-03 | 2.4 | 1.91E-01 | NS   | 7.80E-01 | NS   |
| A_64_P395299  | NM_001105855 |        |            |                                                                                                    | 3.51E-02 | 2.4 | 4.56E-01 | NS   | 1.17E-01 | NS   |
| A_44_P1057585 | NM_001106263 | 292935 | Htatip2    | HIV-1 tat interactive protein 2, homolog (human)                                                   | 2.04E-03 | 2.4 | 9.01E-04 | 1.4  | 3.38E-01 | NS   |
| A_64_P035291  | NM_001159739 | 494500 | Gsta5      | glutathione S-transferase Yc2 subunit solute carrier family 39 (zinc transporter), member 4        | 2.04E-02 | 2.4 | 8.13E-03 | 1.4  | 1.52E-01 | NS   |
| A_42_P692476  | NM_001077669 | 300051 | Slc39a4    | member 4                                                                                           | 2.12E-02 | 2.4 | 2.71E-01 | NS   | 1.86E-01 | NS   |
| A_64_P007703  | NM_031674    | 63835  | Ctla4      | cytotoxic T-lymphocyte-associated protein 4                                                        | 4.44E-03 | 2.4 | 8.33E-01 | NS   | 7.23E-01 | NS   |
| A_64_P073614  | NM_053514    | 85327  | Lin7a      | lin-7 homolog a (C. elegans)                                                                       | 3.62E-02 | 2.4 | 7.23E-03 | -1.3 | 1.49E-01 | NS   |
| A_44_P496624  | NM_022302    | 64169  | Necab1     | N-terminal EF-hand calcium binding protein 1                                                       | 1.06E-02 | 2.5 | 1.17E-01 | NS   | 7.73E-01 | NS   |
| A_64_P025543  | NM_001107623 | 309724 | Tmem26     | transmembrane protein 26                                                                           | 1.79E-02 | 2.5 | 8.32E-01 | NS   | 6.42E-01 | NS   |
| A_64_P051208  | NM_001106514 | 296178 | Mcm8       | minichromosome maintenance complex component 8                                                     | 3.07E-02 | 2.5 | 9.66E-03 | 1.6  | 9.77E-01 | NS   |
| A_44_P243111  | NM_080580    | 140665 | Rab3d      | RAB3D, member RAS oncogene family similar to chromosome condensation protein G                     | 2.34E-02 | 2.5 | 9.97E-01 | NS   | 8.21E-02 | NS   |
| A_44_P297428  | XM_001058724 | 305392 | RGD1562646 | protein G                                                                                          | 4.67E-02 | 2.5 | 7.11E-01 | NS   | 3.45E-01 | NS   |
| A_64_P004231  | NM_001159739 | 494500 | Gsta5      | glutathione S-transferase Yc2 subunit                                                              | 5.74E-03 | 2.5 | 8.80E-04 | 1.5  | 1.48E-01 | NS   |
| A_64_P012902  | NM_001109433 | 680945 | Sdf2l1     | stromal cell-derived factor 2-like 1                                                               | 1.52E-03 | 2.5 | 7.22E-02 | NS   | 1.45E-01 | NS   |
| A_42_P538135  | NM_012858    | 25329  | Lhb        | luteinizing hormone beta                                                                           | 6.02E-03 | 2.5 | 3.19E-01 | NS   | 6.84E-01 | NS   |
| A_42_P842833  | NM_001047858 | 296271 | Srxn1      | sulfiredoxin 1 homolog (S. cerevisiae)                                                             | 6.70E-04 | 2.5 | 4.26E-03 | 1.6  | 3.16E-01 | NS   |
| A_64_P119154  | NM_001000338 | 295843 | Olr619     | olfactory receptor 619                                                                             | 3.56E-02 | 2.5 | 9.81E-01 | NS   | 9.63E-02 | NS   |
| A_64_P136602  | NM_198784    | 362527 | Mup4       | major urinary protein 4                                                                            | 1.78E-02 | 2.5 | 6.14E-01 | NS   | 6.58E-01 | NS   |
| A_44_P1034541 | NM_022602    | 64534  | Pim3       | pim-3 oncogene                                                                                     | 1.11E-02 | 2.5 | 2.73E-01 | NS   | 8.99E-01 | NS   |
| A_44_P372810  | NM_001025673 | 306464 | Mlf1ip     | myeloid leukemia factor 1 interacting protein                                                      | 2.45E-02 | 2.5 | 4.39E-01 | NS   | 4.88E-01 | NS   |
| A_64_P273771  | XM_002725480 |        |            |                                                                                                    | 4.36E-03 | 2.5 | 4.66E-01 | NS   | 7.46E-01 | NS   |
| A_64_P150618  | NM_001109548 | 689755 | LOC689755  | hypothetical protein LOC689755                                                                     | 4.96E-02 | 2.5 | 3.90E-01 | NS   | 9.59E-03 | -2.1 |
| A_44_P260751  | NM_153735    | 266777 | Nptx1      | neuronal pentraxin 1                                                                               | 8.57E-03 | 2.5 | 9.64E-01 | NS   | 8.59E-01 | NS   |
| A_64_P019401  | NM_001109433 | 680945 | Sdf2l1     | stromal cell-derived factor 2-like 1 major facilitator superfamily domain containing 2             | 1.08E-03 | 2.5 | 4.10E-02 | 1.5  | 1.95E-01 | NS   |
| A_44_P269930  | NM_001106683 | 298504 | Mfsd2      | containing 2                                                                                       | 1.28E-02 | 2.5 | 1.08E-01 | NS   | 5.63E-03 | 2.0  |
| A_64_P141747  | NM_001106825 | 300751 | RGD1311874 | hypothetical LOC300751                                                                             | 1.12E-03 | 2.5 | 6.99E-01 | NS   | 3.31E-01 | NS   |
| A_44_P1014420 | XM_001056872 | 315530 | Rics       | Rho GTPase-activating protein spectrin, alpha, erythrocytic 1 (elliptocytosis 2)                   | 3.95E-02 | 2.6 | 6.09E-01 | NS   | 4.47E-02 | -1.5 |
| A_64_P000930  | NM_001011908 | 289257 | Spta1      | internexin neuronal intermediate filament protein, alpha                                           | 9.78E-03 | 2.6 | 3.26E-02 | 1.4  | 1.54E-01 | NS   |
| A_44_P421375  | NM_019128    | 24503  | Ina        | protein, alpha                                                                                     | 3.32E-02 | 2.6 | 7.66E-01 | NS   | 5.52E-02 | NS   |
| A_44_P312038  | XM_345959    | 367121 | RGD1560019 | similar to hypothetical protein                                                                    | 5.77E-03 | 2.6 | 4.18E-01 | NS   | 3.29E-01 | NS   |
| A_42_P624195  | NM_031509    | 24421  | Gsta3      | glutathione S-transferase A3                                                                       | 5.15E-03 | 2.6 | 4.05E-04 | 1.7  | 9.69E-02 | NS   |

|              |              |        |            |                                                                                            |          |       |          |      |          |      |
|--------------|--------------|--------|------------|--------------------------------------------------------------------------------------------|----------|-------|----------|------|----------|------|
| A_44_P255424 | NM_001135762 | 368128 | Hpse2      | heparanase 2                                                                               | 4.04E-03 | 2.6   | 7.09E-01 | NS   | 5.27E-01 | NS   |
| A_64_P095005 | NM_001037217 | 304301 | Mmd2       | monocyte to macrophage differentiation-associated 2                                        | 4.51E-02 | 2.6   | 4.40E-01 | NS   | 9.96E-02 | NS   |
| A_64_P000934 | NM_001127523 | 288272 | RGD1310778 | similar to Putative protein C21orf45 cytochrome P450, family 4, subfamily a, polypeptide 2 | 1.26E-02 | 2.6   | 8.41E-03 | 1.4  | 2.32E-01 | NS   |
| A_64_P019361 | NM_001044770 | 24306  | Cyp4a2     | NS5A (hepatitis C virus) transactivated protein 9                                          | 2.11E-03 | 2.6   | 7.52E-02 | NS   | 7.31E-03 | -1.8 |
| A_44_P477555 | NM_201418    | 300795 | Ns5atp9    | E74-like factor 5                                                                          | 1.38E-02 | 2.6   | 6.74E-02 | NS   | 3.91E-01 | NS   |
| A_42_P821316 | NM_001108956 | 366142 | Elf5       | major urinary protein 5                                                                    | 4.93E-02 | 2.6   | 4.84E-02 | 1.4  | 1.51E-01 | NS   |
| A_44_P214936 | NM_203325    | 298107 | Mup5       | DNA-damage-inducible transcript 4                                                          | 1.30E-02 | 2.6   | 8.60E-01 | NS   | 8.43E-01 | NS   |
| A_44_P414860 | XM_345276    |        |            | origin recognition complex, subunit 6 like (yeast)                                         | 2.06E-02 | 2.6   | 1.77E-01 | NS   | 8.86E-01 | NS   |
| A_42_P605985 | NM_080906    | 140942 | Ddit4      | prodynorphin                                                                               | 4.26E-03 | 2.6   | 3.45E-01 | NS   | 5.22E-02 | NS   |
| A_44_P499287 | NM_001033690 | 291927 | Orc6l      | transcription factor 7, T-cell specific                                                    | 1.81E-02 | 2.6   | 9.12E-02 | NS   | 9.25E-01 | NS   |
| A_44_P476915 | NM_019374    | 29190  | Pdyn       | hematopoietically expressed homeobox                                                       | 2.77E-02 | 2.7   | 9.14E-01 | NS   | 3.94E-01 | NS   |
| A_64_P103404 | XM_001073458 | 363595 | Tcf7       | similar to germ cell-less                                                                  | 6.64E-03 | 2.7   | 9.66E-02 | NS   | 9.15E-01 | NS   |
| A_43_P12437  | NM_024385    | 79237  | Hhex       | glucagon                                                                                   | 3.23E-02 | 2.7   | 8.02E-01 | NS   | 6.08E-02 | NS   |
| A_64_P070651 | NM_001106728 | 299036 | RGD1565657 | angiopoietin-like 4                                                                        | 1.99E-03 | 2.7   | 8.70E-01 | NS   | 1.09E-01 | NS   |
| A_44_P298465 | NM_012707    | 24952  | Gcg        | chitinase, acidic                                                                          | 4.07E-03 | 2.8   | 4.06E-01 | NS   | 8.67E-01 | NS   |
| A_64_P088382 | NM_199115    | 362850 | Angptl4    | esterase 22                                                                                | 3.22E-03 | 2.8   | 4.84E-01 | NS   | 7.43E-01 | NS   |
| A_64_P142251 | NM_207586    | 113901 | Chia       | sodium channel, voltage-gated, type X, alpha                                               | 1.88E-02 | 2.9   | 4.11E-01 | NS   | 5.55E-01 | NS   |
| A_44_P334556 | BF549697     |        |            |                                                                                            | 2.77E-02 | 2.9   | 8.86E-01 | NS   | 1.03E-01 | NS   |
| A_64_P006498 | NM_031565    | 29225  | Es22       | Mov10l1, Moloney leukemia virus 10-like 1, homolog (mouse)                                 | 2.06E-05 | 3.0   | 5.63E-04 | 2.0  | 1.44E-01 | NS   |
| A_64_P051229 | XM_002725775 |        |            | glycoprotein m6a                                                                           | 4.72E-02 | 3.0   | 3.93E-03 | 1.6  | 5.48E-01 | NS   |
| A_44_P941612 | DV716430     |        |            | killer cell lectin-like receptor subfamily C, member 2                                     | 2.18E-02 | 3.0   | 4.57E-01 | NS   | 8.97E-03 | -2.1 |
| A_64_P069374 | NM_017247    | 29571  | Scn10a     | nucleolar protein 4                                                                        | 3.10E-04 | 3.1   | 2.93E-04 | 1.9  | 2.64E-01 | NS   |
| A_64_P050150 | BX883049     |        |            | aldo-keto reductase family 1, member B8                                                    | 1.35E-03 | 3.1   | 6.04E-01 | NS   | 5.45E-01 | NS   |
| A_64_P012009 | NM_001106787 | 300141 | Mov10l1    | prostaglandin reductase 1                                                                  | 2.56E-02 | 3.2   | 7.64E-03 | 2.4  | 1.49E-04 | -3.4 |
| A_44_P652899 | NM_178105    | 306439 | Gpm6a      | placental growth factor                                                                    | 7.82E-03 | 3.2   | 8.89E-01 | NS   | 1.58E-01 | NS   |
| A_64_P124984 | NM_019261    | 29684  | Klrc2      | peptidylprolyl isomerase (cyclophilin) like 5                                              | 1.05E-03 | 3.3   | 1.37E-01 | NS   | 7.45E-03 | -2.3 |
| A_64_P132666 | NM_001107401 | 307553 | No14       | integrin-binding sialoprotein                                                              | 2.95E-02 | 3.4   | 1.17E-03 | 1.7  | 2.73E-01 | NS   |
| A_44_P426107 | NM_173136    | 286921 | Akr1b8     | defensin NP-4 precursor                                                                    | 4.96E-04 | 3.4   | 1.24E-01 | NS   | 1.41E-01 | NS   |
| A_42_P698240 | NM_138863    | 192227 | Ptgr1      | dopamine receptor D2                                                                       | 2.15E-02 | 3.4   | 4.89E-02 | 1.3  | 2.06E-01 | NS   |
| A_64_P120634 | NM_053595    | 94203  | Pgf        | hypothetical protein LOC680310                                                             | 2.31E-03 | 3.4   | 1.83E-01 | NS   | 3.46E-01 | NS   |
| A_64_P123288 | NM_001109483 | 685860 | Ppil5      | similar to RIKEN cDNA 5330437I02 gene                                                      | 1.88E-03 | 3.7   | 4.12E-03 | 1.6  | 4.83E-01 | NS   |
| A_44_P255216 | NM_012587    | 24477  | Ibsp       |                                                                                            | 1.16E-02 | 3.9   | 9.35E-01 | NS   | 8.91E-02 | NS   |
| A_44_P869774 | XM_001068837 |        |            |                                                                                            | 6.82E-04 | 4.3   | 6.27E-02 | NS   | 6.45E-02 | NS   |
| A_64_P115157 | NM_031565    | 29225  | Es22       |                                                                                            | 2.95E-04 | 4.5   | 1.39E-03 | 2.1  | 1.58E-01 | NS   |
| A_64_P032504 | NM_173299    | 286958 | Es22       |                                                                                            | 3.86E-02 | 4.5   | 9.91E-01 | NS   | 8.36E-01 | NS   |
| A_42_P625922 | NM_012547    | 24318  | Np4        |                                                                                            | 1.90E-02 | 5.2   | 5.60E-02 | 2.4  | 7.77E-01 | NS   |
| A_64_P014736 | XM_001056586 | 680310 | Drd2       |                                                                                            | 9.95E-03 | 6.2   | 4.85E-01 | NS   | 4.44E-01 | NS   |
| A_64_P132721 | NM_001106139 | 291549 | LOC680310  |                                                                                            | 2.36E-02 | 7.2   | 4.51E-01 | NS   | 7.47E-02 | NS   |
| A_64_P059728 | XM_214813    |        | RGD1304731 |                                                                                            | 9.47E-05 | 7.2   | 6.94E-01 | NS   | 8.83E-01 | NS   |
| A_64_P076450 | NM_139326    | 24664  | Pomc       |                                                                                            | 1.95E-03 | 18.4  | 3.13E-02 | 6.3  | 6.17E-03 | -1.5 |
| A_64_P048349 | NM_001034848 | 24391  | Gh1        |                                                                                            | 2.06E-03 | 32.7  | 7.24E-02 | NS   | 2.17E-01 | NS   |
| A_64_P085680 | NM_053918    | 116700 | Cga        |                                                                                            | 1.03E-03 | 36.6  | 1.30E-01 | NS   | 6.50E-01 | NS   |
| A_64_P003654 | NM_012629    | 24683  | Prl        |                                                                                            | 2.93E-04 | 363.0 | 7.72E-02 | NS   | 2.09E-01 | NS   |
| A_64_P069942 | NM_001134586 | 363274 | RGD1563955 |                                                                                            | 8.49E-01 | NS    | 9.55E-03 | -4.5 | 5.39E-01 | NS   |
| A_44_P541485 | NM_001107931 | 313225 | Murc       |                                                                                            | 1.35E-01 | NS    | 4.51E-02 | -4.1 | 3.84E-01 | NS   |
| A_44_P156262 | NM_176079    | 337868 | Myod1      |                                                                                            | 8.85E-02 | NS    | 3.60E-02 | -4.0 | 6.85E-01 | NS   |
| A_44_P539299 | XM_002742435 |        |            |                                                                                            | 5.69E-02 | NS    | 2.13E-02 | -4.0 | 8.57E-03 | 2.9  |
| A_44_P385066 | NM_031813    | 83708  | Mybph      |                                                                                            | 1.70E-01 | NS    | 4.19E-02 | -3.8 | 8.95E-02 | NS   |
| A_44_P262593 | NM_001107589 | 309374 | Ankrd2     |                                                                                            | 7.80E-02 | NS    | 4.06E-02 | -3.4 | 8.50E-01 | NS   |
| A_64_P023245 | AB046449     | 246301 | Ascl3      |                                                                                            | 6.14E-01 | NS    | 4.65E-02 | -3.4 | 1.11E-01 | NS   |

|              |              |        |            |                                                                          |          |    |          |      |          |      |
|--------------|--------------|--------|------------|--------------------------------------------------------------------------|----------|----|----------|------|----------|------|
| A_64_P067993 | NM_001166267 | 502412 | RGD1562885 | similar to RIKEN cDNA 2300002M23                                         | 8.99E-01 | NS | 5.41E-03 | -3.4 |          | NS   |
| A_64_P074126 | NM_001163921 | 685202 | Ccdc4811   | coiled-coil domain containing 48-like1                                   | 8.79E-01 | NS | 5.07E-05 | -3.2 | 4.42E-01 | NS   |
| A_43_P20887  | NM_001109390 | 680047 | Pcdhb9     | protocadherin beta 9                                                     | 6.95E-01 | NS | 4.11E-02 | -3.2 | 6.59E-01 | NS   |
| A_64_P129316 | NM_017232    | 29527  | Ptgs2      | prostaglandin-endoperoxide synthase 2                                    | 5.53E-01 | NS | 3.74E-04 | -3.1 | 2.40E-01 | NS   |
| A_42_P686234 | XM_221384    |        |            |                                                                          | 4.85E-01 | NS | 8.51E-03 | -3.1 | 3.14E-01 | NS   |
| A_64_P029596 | NM_001102417 | 296354 | Svs3b      | seminal vesicle secretory protein 3B                                     | 8.69E-01 | NS | 3.95E-02 | -3.0 | 2.78E-02 | -1.6 |
| A_42_P798447 | XM_001080179 | 687797 | LOC687797  | similar to tumor suppressor candidate 5                                  | 1.18E-01 | NS | 3.97E-02 | -3.0 | 5.50E-01 | NS   |
| A_64_P115556 | NM_001004021 | 287699 | Krt13      | keratin 13                                                               | 9.96E-01 | NS | 1.69E-02 | -2.9 | 2.13E-02 | 28.1 |
| A_64_P317400 | XM_001056444 |        |            |                                                                          | 2.97E-01 | NS | 7.82E-03 | -2.9 | 7.78E-01 | NS   |
| A_64_P017133 | XR_008124    |        |            |                                                                          | 1.55E-01 | NS | 3.07E-02 | -2.8 | 9.24E-01 | NS   |
| A_64_P004660 | NM_001109635 | 691300 | LOC691300  | hypothetical protein LOC691300                                           | 3.07E-01 | NS | 4.89E-02 | -2.8 | 3.38E-01 | NS   |
| A_44_P342289 | NR_027324    | 309122 | H19        | H19, imprinted maternally expressed transcript                           | 8.67E-02 | NS | 3.47E-02 | -2.8 | 7.87E-01 | NS   |
| A_44_P977085 | NM_001109431 | 680885 | LOC680885  | hypothetical protein LOC680885                                           | 5.80E-01 | NS | 3.94E-02 | -2.8 | 9.43E-01 | NS   |
| A_64_P047937 | XM_225698    | 307248 | Pstpip2    | proline-serine-threonine phosphatase-interacting protein 2               | 1.03E-01 | NS | 1.38E-02 | -2.8 | 7.72E-02 | NS   |
| A_44_P306551 | M64373       |        |            |                                                                          | 2.98E-01 | NS | 1.87E-02 | -2.7 | 3.74E-01 | NS   |
| A_64_P098324 | NM_012795    | 25259  | Gp5        | glycoprotein V (platelet)                                                | 4.34E-01 | NS | 2.36E-03 | -2.6 | 3.73E-01 | NS   |
| A_64_P117468 | NM_001108180 | 315962 | Ky         | kyphoscoliosis peptidase                                                 | 5.26E-02 | NS | 3.63E-02 | -2.6 | 3.82E-02 | 3.1  |
| A_64_P020441 | NM_001108170 | 315833 | Klh31      | kelch-like 31 (Drosophila)                                               | 1.15E-01 | NS | 4.62E-02 | -2.6 | 1.24E-01 | NS   |
| A_42_P671348 | NM_001106868 | 301073 | Hhntl      | hedgehog acyltransferase-like                                            | 6.39E-02 | NS | 4.11E-02 | -2.6 | 1.07E-01 | NS   |
| A_64_P071188 | XM_001056974 | 300289 | Amot       | angiominin                                                               | 1.32E-01 | NS | 1.05E-02 | -2.6 | 5.49E-01 | NS   |
| A_44_P227132 | NM_001106035 | 290217 | RGD1564324 | similar to dehydrogenase/reductase member 2                              | 5.89E-01 | NS | 2.79E-02 | -2.5 | 6.17E-01 | NS   |
| A_64_P010348 | XM_001070120 |        |            |                                                                          | 9.21E-02 | NS | 4.76E-02 | -2.5 | 1.18E-01 | NS   |
| A_64_P018751 | NM_001142366 | 25293  | Aqp4       | aquaporin 4                                                              | 1.53E-01 | NS | 2.36E-02 | -2.5 | 1.44E-01 | NS   |
| A_64_P059491 | NM_080688    | 140693 | Plcd4      | phospholipase C, delta 4                                                 | 3.05E-01 | NS | 3.27E-02 | -2.5 | 2.09E-01 | NS   |
| A_44_P167951 | NM_053772    | 114906 | Pkia       | protein kinase (cAMP-dependent, catalytic) inhibitor alpha               | 1.01E-01 | NS | 2.72E-02 | -2.5 | 1.72E-01 | NS   |
| A_64_P021166 | XR_008854    |        |            |                                                                          | 7.00E-01 | NS | 1.73E-02 | -2.5 | 3.01E-02 | -1.5 |
| A_64_P075067 | XM_345846    | 366949 | Mafa       | v-maf musculoaponeurotic fibrosarcoma oncogene homolog A (avian)         | 6.79E-02 | NS | 3.03E-02 | -2.5 | 1.17E-01 | NS   |
| A_43_P16282  | S76214       |        |            |                                                                          | 6.13E-02 | NS | 4.03E-02 | -2.5 | 3.36E-01 | NS   |
| A_64_P151756 | NM_001109385 | 679958 | LOC679958  | similar to CG10806-PB, isoform B                                         | 2.24E-01 | NS | 3.60E-02 | -2.4 | 8.75E-01 | NS   |
| A_44_P442780 | NM_017303    | 29737  | Kcnab1     | potassium voltage-gated channel, shaker-related subfamily, beta member 1 | 5.74E-01 | NS | 4.34E-02 | -2.4 | 5.01E-01 | NS   |
| A_43_P16066  | NM_198050    | 246209 | Kif27      | kinesin family member 27                                                 | 9.90E-01 | NS | 4.50E-02 | -2.4 | 5.20E-01 | NS   |
| A_44_P318546 | NM_022624    | 64559  | Slc22a23   | solute carrier family 22, member 23                                      | 4.29E-01 | NS | 2.54E-02 | -2.4 | 5.35E-01 | NS   |
| A_64_P023018 | CB606389     | 316090 | Fam198a    | family with sequence similarity 198, member A                            | 7.81E-02 | NS | 4.60E-02 | -2.3 | 1.08E-01 | NS   |
| A_64_P095136 | NM_001109458 | 685169 | Fam163b    | family with sequence similarity 163, member B                            | 4.43E-01 | NS | 1.17E-02 | -2.3 | 5.63E-01 | NS   |
| A_64_P105373 | NM_001109289 | 500945 | RGD1561795 | similar to RIKEN cDNA 1700012B09                                         | 5.49E-01 | NS | 2.05E-02 | -2.3 | 8.17E-02 | NS   |
| A_64_P126640 | NM_001001076 | 405966 | Olr1064    | olfactory receptor 1064                                                  | 3.08E-01 | NS | 1.64E-02 | -2.3 | 6.22E-01 | NS   |
| A_64_P203817 | NM_001001368 | 288875 | Olr943     | olfactory receptor 943                                                   | 6.43E-02 | NS | 4.18E-02 | -2.3 | 2.44E-01 | NS   |
| A_64_P097014 | XM_001065563 |        |            |                                                                          | 7.19E-01 | NS | 4.61E-02 | -2.3 | 3.39E-01 | NS   |
| A_44_P277058 | XM_001066248 | 316399 | Ccdc150    | coiled-coil domain containing 150                                        | 8.53E-01 | NS | 2.98E-02 | -2.3 | 8.12E-02 | NS   |
| A_44_P348781 | NM_012696    | 24903  | Kng1       | kininogen 1                                                              | 7.51E-01 | NS | 1.92E-02 | -2.3 | 3.35E-01 | NS   |
| A_44_P272108 | XM_001080166 | 295999 | RGD1309783 | similar to RIKEN cDNA 4930430A15                                         | 6.28E-01 | NS | 5.20E-03 | -2.3 | 5.71E-02 | NS   |
| A_64_P135833 | XM_001080943 | 314847 | Best3      | bestrophin 3                                                             | 1.22E-01 | NS | 6.48E-03 | -2.3 | 5.19E-02 | NS   |
| A_64_P006077 | XM_001063305 | 682829 | LOC682829  | similar to benzodiazapine receptor, peripheral-like 1                    | 1.51E-01 | NS | 7.87E-03 | -2.3 | 9.01E-02 | NS   |
| A_64_P098053 | NM_001105873 | 288044 | Tm4sf19    | transmembrane 4 L six family member 19                                   | 8.02E-01 | NS | 1.03E-02 | -2.3 | 2.70E-01 | NS   |
| A_44_P791908 | XR_008965    | 500243 | RGD1560859 | similar to 2300003P22Rik protein                                         | 2.08E-01 | NS | 3.39E-03 | -2.3 | 7.27E-02 | NS   |
| A_64_P103174 | NM_001003929 | 313173 | Cnfr       | ciliary neurotrophic factor receptor                                     | 8.43E-02 | NS | 1.66E-03 | -2.2 | 3.56E-02 | 1.5  |
| A_44_P769703 | NM_178096    | 338475 | Nrep       | neuronal regeneration related protein                                    | 7.18E-02 | NS | 3.28E-03 | -2.2 | 3.74E-01 | NS   |
| A_43_P10996  | NM_012507    | 24214  | Atp1b2     | ATPase, Na <sup>+</sup> /K <sup>+</sup> transporting, beta 2 polypeptide | 3.59E-01 | NS | 3.69E-02 | -2.2 | 4.12E-01 | NS   |
| A_43_P16203  | XM_001057601 |        |            |                                                                          | 5.99E-01 | NS | 1.05E-02 | -2.2 | 2.16E-01 | NS   |
| A_44_P622992 | NM_001024339 | 500377 | Tuba8      | tubulin, alpha 8                                                         | 2.05E-01 | NS | 1.46E-02 | -2.2 | 2.32E-01 | NS   |



|              |              |        |            |                                                                                                                      |          |    |          |      |          |      |
|--------------|--------------|--------|------------|----------------------------------------------------------------------------------------------------------------------|----------|----|----------|------|----------|------|
| A_64_P008867 | NM_016998    | 24269  | Cpa1       | carboxypeptidase A1                                                                                                  | 9.93E-02 | NS | 3.82E-02 | -2.2 | 2.41E-01 | NS   |
| A_64_P000480 | NM_001108530 | 361831 | Ube2d1     | ubiquitin-conjugating enzyme E2D 1, UBC4/5 homolog (yeast)                                                           | 6.54E-02 | NS | 4.84E-02 | -2.2 | 3.31E-01 | NS   |
| A_64_P035709 | NM_001109492 | 686081 | B3galt2    | UDP-Gal:betaGlcNAc beta 1,3-galactosyltransferase, polypeptide 2                                                     | 7.37E-01 | NS | 1.45E-02 | -2.2 | 6.76E-01 | NS   |
| A_44_P126638 | XR_085562    | 287646 | Ttl6       | tubulin tyrosine ligase-like family, member 6                                                                        | 8.13E-02 | NS | 2.05E-02 | -2.2 | 1.50E-01 | NS   |
| A_64_P113592 | NM_001134849 | 684972 | Fam25a     | family with sequence similarity 25, member A                                                                         | 9.13E-01 | NS | 3.69E-02 | -2.1 | 5.64E-02 | NS   |
| A_64_P250567 | XM_340807    |        |            |                                                                                                                      | 7.66E-02 | NS | 2.94E-02 | -2.1 | 4.04E-01 | NS   |
| A_64_P042152 | NM_001107473 | 308322 | Zim1       | zinc finger, imprinted 1                                                                                             | 5.71E-02 | NS | 8.97E-03 | -2.1 | 4.94E-01 | NS   |
| A_64_P295169 | AI236441     |        |            |                                                                                                                      | 5.82E-01 | NS | 3.07E-02 | -2.1 | 3.93E-01 | NS   |
| A_64_P065600 | NM_022954    | 65048  | Fat2       | FAT tumor suppressor homolog 2 (Drosophila)                                                                          | 8.38E-01 | NS | 1.40E-02 | -2.1 | 7.42E-01 | NS   |
| A_64_P054681 | XM_001067238 | 315324 | Krt78      | keratin 78                                                                                                           | 6.79E-01 | NS | 3.81E-03 | -2.1 | 2.87E-02 | 13.8 |
| A_64_P006753 | NM_001000485 | 302027 | Olr1096    | olfactory receptor 1096                                                                                              | 7.60E-01 | NS | 3.14E-02 | -2.1 | 3.36E-01 | NS   |
| A_64_P034264 | XM_001078222 |        |            |                                                                                                                      | 1.80E-01 | NS | 8.95E-03 | -2.0 | 5.62E-01 | NS   |
| A_64_P094050 | NM_001030044 | 498918 | Irx5       | iroquois homeobox 5                                                                                                  | 1.62E-01 | NS | 4.41E-02 | -2.0 | 3.17E-01 | NS   |
| A_64_P006563 | NM_001107755 | 311252 | Pamr1      | peptidase domain containing associated with muscle regeneration 1                                                    | 7.73E-01 | NS | 8.21E-03 | -2.0 | 1.90E-01 | NS   |
| A_64_P062648 | NM_001106352 | 293937 | Pkd2l1     | polycystic kidney disease 2-like 1                                                                                   | 2.65E-01 | NS | 3.90E-02 | -2.0 | 2.48E-01 | NS   |
| A_42_P826938 | NM_001109374 | 679668 | LRRTM1     | leucine rich repeat transmembrane neuronal 1                                                                         | 3.89E-01 | NS | 1.11E-02 | -2.0 | 7.18E-01 | NS   |
| A_64_P156079 | NM_001126085 | 498934 | Lsm6       | LSM6 homolog, U6 small nuclear RNA associated (S. cerevisiae)                                                        | 1.99E-01 | NS | 2.83E-02 | -2.0 | 1.30E-01 | NS   |
| A_64_P050877 | XM_001081816 | 688321 | LOC688321  | similar to Lung carbonyl reductase [NADPH] (NADPH-dependent carbonyl reductase) (LCR) (Adipocyte P27 protein) (AP27) | 8.42E-01 | NS | 1.10E-03 | -2.0 | 6.12E-01 | NS   |
| A_64_P017952 | AY321325     |        |            |                                                                                                                      | 1.02E-01 | NS | 7.15E-03 | -2.0 | 6.29E-01 | NS   |
| A_43_P13203  | NM_133537    | 171059 | Expi       | extracellular proteinase inhibitor                                                                                   | 1.24E-01 | NS | 4.43E-02 | -2.0 | 5.68E-01 | NS   |
| A_44_P328097 | NM_031650    | 58978  | Slc01b3    | solute carrier organic anion transporter family, member 1b3                                                          | 9.76E-01 | NS | 1.98E-02 | -2.0 | 9.22E-02 | NS   |
| A_42_P463998 | NM_031013    | 81642  | Abcc6      | ATP-binding cassette, sub-family C (CFTR/MRP), member 6                                                              | 6.66E-01 | NS | 2.30E-02 | -2.0 | 1.94E-02 | -1.5 |
| A_43_P11654  | NM_013007    | 25516  | Phoc       | prepronociceptin                                                                                                     | 2.23E-01 | NS | 1.44E-02 | -2.0 | 2.95E-01 | NS   |
| A_44_P399414 | NM_012593    | 24523  | Klk11      | kallikrein 1-like peptidase                                                                                          | 1.17E-01 | NS | 2.52E-02 | -2.0 | 1.31E-01 | NS   |
| A_42_P512860 | NM_001005549 | 300846 | Tinag      | tubulointerstitial nephritis antigen                                                                                 | 1.81E-01 | NS | 5.98E-03 | -2.0 | 7.87E-01 | NS   |
| A_64_P075762 | XM_341045    | 360777 | RGD1563400 | similar to paired immunoglobulin-like type 2 receptor beta                                                           | 8.52E-01 | NS | 1.86E-02 | -2.0 | 6.98E-01 | NS   |
| A_64_P060662 | NM_001032397 | 252856 | Tcf21      | transcription factor 21                                                                                              | 8.02E-01 | NS | 4.91E-02 | -2.0 | 7.44E-01 | NS   |
| A_44_P418245 | NM_013028    | 25546  | Shox2      | short stature homeobox 2                                                                                             | 8.84E-01 | NS | 1.39E-03 | -1.9 | 1.31E-01 | NS   |
| A_64_P006608 | XM_002725807 |        |            |                                                                                                                      | 7.48E-01 | NS | 1.29E-02 | -1.9 | 8.27E-01 | NS   |
| A_64_P092342 | NM_001042354 | 24245  | Camk2b     | calcium/calmodulin-dependent protein kinase II beta                                                                  | 6.20E-02 | NS | 4.50E-02 | -1.9 | 2.68E-01 | NS   |
| A_44_P885377 | NM_001104633 | 246262 | Sema3d     | sema domain, immunoglobulin domain (Ig), short basic domain, secreted, (semaphorin) 3D                               | 2.33E-01 | NS | 9.25E-03 | -1.9 | 6.85E-01 | NS   |
| A_64_P009788 | XM_002726146 | 83826  | Nr5a1      | nuclear receptor subfamily 5, group A, member 1                                                                      | 4.80E-01 | NS | 1.35E-04 | -1.9 | 2.73E-01 | NS   |
| A_64_P160333 | NM_001134541 | 305812 | RGD1563070 | similar to hypothetical protein                                                                                      | 5.31E-01 | NS | 2.21E-02 | -1.9 | 1.99E-01 | NS   |
| A_64_P031329 | NM_001107224 | 305431 | Stk32b     | serine/threonine kinase 32B                                                                                          | 6.72E-02 | NS | 1.09E-02 | -1.9 | 2.69E-01 | NS   |
| A_64_P040989 | NM_031605    | 266674 | Cyp4a8     | cytochrome P450, family 4, subfamily a, polypeptide 8                                                                | 6.49E-01 | NS | 1.65E-02 | -1.9 | 9.02E-01 | NS   |
| A_64_P034128 | NM_178096    | 338475 | Nrep       | neuronal regeneration related protein                                                                                | 1.19E-01 | NS | 7.76E-03 | -1.9 | 8.04E-01 | NS   |
| A_44_P139815 | NM_001000224 | 293424 | Olr282     | olfactory receptor 282                                                                                               | 3.35E-01 | NS | 4.70E-02 | -1.9 | 4.23E-01 | NS   |
| A_43_P16740  | NM_001106103 | 291015 | Ogn        | osteoglycin                                                                                                          | 9.29E-01 | NS | 1.33E-03 | -1.9 | 7.11E-02 | NS   |

|              |              |        |            |                                                                                                                                             |          |    |          |      |          |      |
|--------------|--------------|--------|------------|---------------------------------------------------------------------------------------------------------------------------------------------|----------|----|----------|------|----------|------|
| A_44_P773533 | NM_001107659 | 310207 | Sema5a     | sema domain, seven thrombospondin repeats (type 1 and type 1-like), transmembrane domain (TM) and short cytoplasmic domain, (semaphorin) 5A | 7.94E-02 | NS | 5.93E-03 | -1.9 | 1.43E-01 | NS   |
| A_42_P812008 | NM_053611    | 113900 | Nupr1      | nuclear protein, transcriptional regulator, 1                                                                                               | 9.00E-01 | NS | 1.11E-02 | -1.9 | 8.09E-01 | NS   |
| A_64_P033205 | NM_053867    | 116646 | Tpt1       | tumor protein, translationally-controlled 1                                                                                                 | 8.10E-01 | NS | 4.29E-02 | -1.9 | 8.17E-01 | NS   |
| A_64_P067908 | NM_022798    | 64702  | Trim17     | tripartite motif-containing 17                                                                                                              | 2.18E-01 | NS | 8.40E-03 | -1.9 | 5.74E-01 | NS   |
| A_44_P944353 | XM_001069261 | 499470 | Armc2      | armadillo repeat containing 2                                                                                                               | 1.33E-01 | NS | 4.03E-02 | -1.9 | 4.24E-01 | NS   |
| A_64_P126995 | NM_145083    | 246296 | Lrrc15     | leucine rich repeat containing 15                                                                                                           | 8.04E-01 | NS | 3.17E-02 | -1.9 | 4.58E-01 | NS   |
| A_44_P319322 | NM_001008761 | 360625 | Krt12      | keratin 12                                                                                                                                  | 2.34E-01 | NS | 2.54E-02 | -1.9 | 1.97E-01 | NS   |
| A_64_P117578 | XM_235209    |        |            |                                                                                                                                             | 8.89E-01 | NS | 4.58E-02 | -1.9 | 5.49E-01 | NS   |
| A_64_P050984 | NM_001107659 | 310207 | Sema5a     | sema domain, seven thrombospondin repeats (type 1 and type 1-like), transmembrane domain (TM) and short cytoplasmic domain, (semaphorin) 5A | 2.08E-01 | NS | 1.03E-02 | -1.9 | 9.82E-02 | NS   |
| A_42_P542985 | NM_001012740 | 291388 | Cbln2      | cerebellin 2 precursor                                                                                                                      | 5.31E-01 | NS | 1.97E-03 | -1.9 | 2.37E-01 | NS   |
| A_44_P461976 | XR_085920    |        |            |                                                                                                                                             | 9.58E-01 | NS | 2.15E-02 | -1.9 | 3.56E-01 | NS   |
| A_64_P091765 | NM_017086    | 25148  | Egr3       | early growth response 3                                                                                                                     | 5.94E-01 | NS | 5.86E-03 | -1.8 | 9.84E-01 | NS   |
| A_64_P140881 | NM_001107701 | 310689 | RGD1309453 | similar to hypothetical protein FLJ32884 preferentially expressed antigen in melanoma-like 1                                                | 7.86E-01 | NS | 2.51E-03 | -1.8 | 4.71E-01 | NS   |
| A_44_P760567 | NM_001109617 | 691051 | Pramel1    |                                                                                                                                             | 6.12E-01 | NS | 3.82E-02 | -1.8 | 2.09E-01 | NS   |
| A_64_P104497 | AABR03059028 |        |            |                                                                                                                                             | 4.03E-01 | NS | 6.63E-03 | -1.8 | 5.23E-01 | NS   |
| A_64_P036063 | NM_001142366 | 25293  | Aqp4       | aquaporin 4                                                                                                                                 | 1.21E-01 | NS | 9.72E-03 | -1.8 | 2.07E-01 | NS   |
| A_64_P013437 | NM_001017496 | 498335 | Cxcl13     | chemokine (C-X-C motif) ligand 13                                                                                                           | 1.25E-01 | NS | 1.38E-02 | -1.8 | 4.13E-04 | -4.2 |
| A_64_P038102 | NM_023996    | 78982  | Tas2r114   | taste receptor, type 2, member 114                                                                                                          | 9.14E-01 | NS | 4.90E-02 | -1.8 | 7.36E-01 | NS   |
| A_64_P071406 | XM_001063062 | 499083 | Zscan18    | zinc finger and SCAN domain containing 18                                                                                                   | 8.23E-01 | NS | 4.18E-02 | -1.8 | 1.37E-01 | NS   |
| A_43_P15533  | NM_017095    | 25410  | Cebpe      | CCAAT/enhancer binding protein (C/EBP), epsilon                                                                                             | 3.80E-01 | NS | 2.12E-02 | -1.8 | 5.80E-01 | NS   |
| A_64_P049456 | NM_012872    | 25343  | Pdc        | phosducin                                                                                                                                   | 8.63E-01 | NS | 4.37E-02 | -1.8 | 1.87E-01 | NS   |
| A_64_P071615 | XM_001075200 | 295423 | RGD1560826 | similar to glyceraldehyde-3-phosphate dehydrogenase                                                                                         | 1.16E-01 | NS | 4.74E-02 | -1.8 | 5.65E-02 | NS   |
| A_64_P050802 | NM_001106985 | 302975 | Syngn3     | synaptogyrin 3                                                                                                                              | 1.18E-01 | NS | 2.79E-02 | -1.8 | 1.16E-01 | NS   |
| A_44_P262122 | NM_145769    | 252892 | Lgi1       | leucine-rich, glioma inactivated 1                                                                                                          | 2.49E-01 | NS | 1.85E-02 | -1.8 | 8.18E-02 | NS   |
| A_42_P678870 | NM_019303    | 54246  | Cyp2f4     | cytochrome P450, family 2, subfamily f, polypeptide 4                                                                                       | 2.71E-01 | NS | 1.29E-02 | -1.8 | 1.80E-01 | NS   |
| A_64_P017363 | NM_001013243 | 366568 | Slc30a3    | solute carrier family 30 (zinc transporter), member 3                                                                                       | 6.44E-01 | NS | 1.67E-04 | -1.8 | 7.70E-01 | NS   |
| A_64_P100327 | XR_007778    |        |            |                                                                                                                                             | 5.90E-02 | NS | 2.95E-02 | -1.8 | 5.97E-01 | NS   |
| A_42_P835462 | NM_024349    | 24183  | Ak1        | adenylate kinase 1                                                                                                                          | 7.52E-02 | NS | 2.44E-02 | -1.8 | 2.71E-01 | NS   |
| A_42_P668126 | NM_017308    | 29744  | Sema6c     | sema domain, transmembrane domain (TM), and cytoplasmic domain, (semaphorin) 6C                                                             | 6.44E-02 | NS | 3.53E-02 | -1.8 | 7.35E-02 | NS   |
| A_64_P069522 | NM_001109168 | 499367 | Calhm1     | calcium homeostasis modulator 1                                                                                                             | 7.86E-01 | NS | 8.50E-03 | -1.8 | 1.66E-01 | NS   |
| A_64_P071645 | XM_001080410 | 687866 | LOC687866  | similar to Myosin IB (MIB) (Brush border myosin IB) (BBMIB)                                                                                 | 7.50E-01 | NS | 1.55E-02 | -1.8 | 5.71E-01 | NS   |
| A_44_P342426 | NM_001106108 | 291100 | Irf4       | interferon regulatory factor 4                                                                                                              | 2.11E-01 | NS | 3.07E-03 | -1.8 | 1.90E-01 | NS   |
| A_43_P20954  | XM_345041    |        |            |                                                                                                                                             | 7.39E-01 | NS | 2.83E-02 | -1.8 | 3.39E-01 | NS   |
| A_64_P166188 |              | 29309  | Coq3       | coenzyme Q3 homolog, methyltransferase (S. cerevisiae)                                                                                      | 4.35E-01 | NS | 3.06E-02 | -1.8 | 4.21E-01 | NS   |
| A_64_P154982 | AF205635     |        |            |                                                                                                                                             | 7.07E-02 | NS | 4.10E-02 | -1.8 | 1.25E-01 | NS   |
| A_42_P822588 | NM_031010    | 81639  | Alox15     | arachidonate 15-lipoxygenase                                                                                                                | 8.80E-01 | NS | 4.52E-02 | -1.8 | 6.84E-01 | NS   |
| A_64_P139975 | NM_001000567 | 366108 | Olf577     | olfactory receptor 577                                                                                                                      | 9.34E-01 | NS | 1.24E-02 | -1.8 | 6.04E-01 | NS   |
| A_64_P042913 | XM_228557    |        |            |                                                                                                                                             | 5.11E-01 | NS | 9.78E-04 | -1.8 | 9.58E-01 | NS   |
| A_43_P11940  | NM_019123    | 29758  | St6galnac3 | ST6 (alpha-N-acetyl-neuraminy-2,3-beta-galactosyl-1,3)-N-acetylglactosaminide                                                               | 7.66E-01 | NS | 1.49E-03 | -1.8 | 5.38E-01 | NS   |
| A_43_P11952  | NM_019151    | 29152  | Mstn       | myostatin                                                                                                                                   | 1.00E-01 | NS | 4.20E-02 | -1.8 | 2.35E-02 | 2.9  |
| A_64_P076470 | XM_001065253 | 548104 | Pcdhb17    | protocadherin beta 17                                                                                                                       | 5.80E-01 | NS | 3.88E-02 | -1.8 | 4.84E-01 | NS   |

|              |              |           |            |                                                                                              |          |    |          |      |          |      |
|--------------|--------------|-----------|------------|----------------------------------------------------------------------------------------------|----------|----|----------|------|----------|------|
| A_64_P095438 | NM_001108873 | 364420    | Tnfrsf10b  | tumor necrosis factor receptor superfamily, member 10b                                       | 2.17E-01 | NS | 1.85E-02 | -1.8 | 5.74E-01 | NS   |
| A_64_P029118 | NM_001107592 | 309380    | Loxl4      | lysyl oxidase-like 4                                                                         | 9.80E-01 | NS | 4.36E-02 | -1.8 | 8.92E-02 | NS   |
| A_64_P053478 | NM_001000748 | 405017    | Olr60      | olfactory receptor 60                                                                        | 8.54E-01 | NS | 3.38E-04 | -1.8 | 5.36E-01 | NS   |
| A_64_P009142 | NM_001000249 | 293765    | Olr327     | olfactory receptor 327                                                                       | 5.63E-01 | NS | 3.03E-02 | -1.8 | 9.22E-01 | NS   |
| A_64_P060319 | XM_574558    | 499263    | Gsg1l      | GSG1-like                                                                                    | 7.38E-01 | NS | 2.32E-02 | -1.7 | 6.86E-02 | NS   |
| A_64_P156319 | NM_001111269 | 689064    | LOC689064  | beta-globin                                                                                  | 8.10E-02 | NS | 2.42E-02 | -1.7 | 7.85E-02 | NS   |
| A_64_P283295 | XM_001056646 |           |            |                                                                                              | 2.13E-01 | NS | 1.04E-02 | -1.7 | 2.47E-01 | NS   |
| A_64_P135888 | XM_001081555 |           |            |                                                                                              | 9.91E-01 | NS | 2.98E-02 | -1.7 | 1.06E-01 | NS   |
| A_64_P050739 | XM_343261    | 500892    | Cyp11b1    | cytochrome P450, family 11, subfamily b, polypeptide 1                                       | 6.42E-01 | NS | 1.10E-02 | -1.7 | 3.55E-01 | NS   |
| A_64_P009624 | XM_001079643 | 499848    | Ccdc73     | coiled-coil domain containing 73                                                             | 5.01E-01 | NS | 1.14E-02 | -1.7 | 6.24E-01 | NS   |
| A_64_P086041 | NM_001025020 | 362235    | Tmem90b    | transmembrane protein 90B                                                                    | 1.00E-01 | NS | 2.20E-02 | -1.7 | 5.55E-01 | NS   |
| A_64_P093078 | NM_001000075 | 288886    | Olr1006    | olfactory receptor 1006                                                                      | 6.63E-01 | NS | 2.77E-02 | -1.7 | 4.78E-01 | NS   |
| A_44_P328046 | NM_172043    | 64459     | Masp2      | mannan-binding lectin serine peptidase 2                                                     | 6.34E-01 | NS | 4.01E-02 | -1.7 | 7.40E-01 | NS   |
| A_64_P004970 | XM_001070223 |           |            |                                                                                              | 8.05E-02 | NS | 4.30E-02 | -1.7 | 8.68E-02 | NS   |
| A_64_P053378 | XM_001078339 | 362846    | RGD1560314 | RGD1560314                                                                                   | 5.43E-01 | NS | 3.11E-02 | -1.7 | 9.35E-01 | NS   |
| A_64_P165376 | NM_013150    | 497815    | Nrcam      | neuronal cell adhesion molecule radical S-adenosyl methionine domain containing 2            | 6.88E-02 | NS | 3.79E-03 | -1.7 | 5.79E-01 | NS   |
| A_64_P114193 | NM_138881    | 65190     | Rsad2      | similar to RIKEN cDNA 5031410I06                                                             | 3.56E-01 | NS | 3.38E-02 | -1.7 | 3.51E-01 | NS   |
| A_64_P132309 | XM_001062428 | 685125    | LOC685125  |                                                                                              | 3.62E-01 | NS | 3.25E-02 | -1.7 | 5.08E-01 | NS   |
| A_64_P039809 | XM_001064543 |           |            |                                                                                              | 4.90E-01 | NS | 1.28E-02 | -1.7 | 8.46E-01 | NS   |
| A_64_P115341 | NM_001135002 | 689425    | LOC689425  | hypothetical protein LOC689425                                                               | 3.02E-01 | NS | 3.35E-03 | -1.7 | 9.85E-01 | NS   |
| A_64_P069957 | NM_173315    | 286981    | Vom2r32    | vomeroneasal 2 receptor, 32                                                                  | 8.65E-01 | NS | 3.59E-02 | -1.7 | 7.60E-01 | NS   |
| A_64_P052980 | NM_001014786 | 298210    | Ifna1      | interferon-alpha 1                                                                           | 6.14E-01 | NS | 2.00E-02 | -1.7 | 8.40E-02 | NS   |
| A_64_P118812 | NM_001000512 | 311175    | Olr601     | olfactory receptor 601                                                                       | 7.16E-01 | NS | 4.35E-02 | -1.7 | 2.14E-01 | NS   |
| A_44_P371635 | NM_053382    | 84397     | Tnfaip6    | tumor necrosis factor alpha induced protein 6                                                | 5.89E-02 | NS | 3.02E-02 | -1.7 | 5.17E-01 | NS   |
| A_64_P058256 | XM_001080607 | 498194    | Mn1        | meningioma 1                                                                                 | 1.71E-01 | NS | 2.08E-02 | -1.7 | 3.77E-01 | NS   |
| A_44_P393352 | NM_001000232 | 293594    | Olr292     | olfactory receptor 292                                                                       | 4.54E-01 | NS | 4.93E-02 | -1.7 | 1.36E-01 | NS   |
| A_44_P415957 | NM_022927    | 54252     | Mid1       | midline 1                                                                                    | 4.59E-01 | NS | 7.60E-03 | -1.7 | 1.02E-01 | NS   |
| A_64_P020358 | XM_001080884 | 296091    | Pla2g4e    | phospholipase A2, group IVE                                                                  | 7.59E-01 | NS | 4.17E-02 | -1.7 | 8.23E-01 | NS   |
| A_42_P592981 | NM_001107989 | 313662    | Mfap2      | microfibrillar-associated protein 2                                                          | 5.37E-02 | NS | 4.11E-02 | -1.7 | 4.49E-02 | 1.4  |
| A_64_P011324 | NM_001024285 | 498999    | Ahrr       | aryl-hydrocarbon receptor repressor                                                          | 8.38E-01 | NS | 3.20E-02 | -1.7 | 4.74E-01 | NS   |
| A_44_P526100 | AY387063     |           |            |                                                                                              | 4.10E-01 | NS | 4.74E-02 | -1.7 | 8.53E-01 | NS   |
| A_42_P620006 | NM_133581    | 171112    | Wfdc1      | WAP four-disulfide core domain 1 solute carrier organic anion transporter family, member 5A1 | 6.04E-02 | NS | 2.52E-02 | -1.7 | 1.63E-01 | NS   |
| A_64_P156837 | NM_001107898 | 312907    | Slco5a1    | LAG1 homolog, ceramide synthase 1                                                            | 1.15E-01 | NS | 4.35E-02 | -1.7 | 8.69E-02 | NS   |
| A_44_P429006 | NM_001044230 | 290658    | Lass1      | LAG1 homolog, ceramide synthase 1                                                            | 5.46E-02 | NS | 9.42E-03 | -1.7 | 1.37E-01 | NS   |
| A_44_P416960 | NM_001108224 | 316521    | Vil1       | villin 1                                                                                     | 4.29E-01 | NS | 3.87E-02 | -1.7 | 6.79E-01 | NS   |
| A_44_P600286 | XM_002726055 |           |            |                                                                                              | 5.40E-01 | NS | 4.08E-02 | -1.7 | 1.55E-01 | NS   |
| A_64_P157400 | NM_001108633 | 362384    | Reep1      | receptor accessory protein 1 ribonuclease, RNase A family, 11 (non-active)                   | 9.94E-01 | NS | 3.04E-04 | -1.7 | 6.79E-01 | NS   |
| A_64_P039616 | NM_001012476 | 497651    | Rnase11    |                                                                                              | 4.38E-01 | NS | 3.98E-02 | -1.7 | 3.74E-01 | NS   |
| A_44_P352268 | NM_031821    | 83722     | Plk2       | polo-like kinase 2 (Drosophila)                                                              | 2.13E-01 | NS | 9.88E-04 | -1.6 | 7.26E-02 | NS   |
| A_64_P166118 | NM_053678    | 114213    | Rax        | retina and anterior neural fold homeobox                                                     | 8.60E-01 | NS | 3.25E-02 | -1.6 | 5.31E-01 | NS   |
| A_64_P099638 | NM_001135809 | 100169711 | Lcn11      | lipocalin 11                                                                                 | 7.66E-01 | NS | 2.97E-02 | -1.6 | 4.40E-02 | -2.6 |
| A_64_P155608 | XM_002724821 |           |            |                                                                                              | 1.58E-01 | NS | 4.96E-02 | -1.6 | 1.24E-01 | NS   |
| A_44_P577899 | NM_001108615 | 362291    | Myt1       | myelin transcription factor 1 sarcoglycan, alpha (dystrophin-associated glycoprotein)        | 4.19E-01 | NS | 1.89E-02 | -1.6 | 1.19E-01 | NS   |
| A_43_P16949  | NM_001107039 | 303468    | Sgca       |                                                                                              | 9.91E-02 | NS | 1.54E-02 | -1.6 | 2.02E-01 | NS   |
| A_64_P073673 | NM_001025145 | 499425    | Zfp365     | zinc finger protein 365                                                                      | 9.26E-02 | NS | 4.61E-03 | -1.6 | 5.53E-01 | NS   |
| A_64_P089195 | XM_002729455 |           |            |                                                                                              | 2.55E-01 | NS | 1.32E-03 | -1.6 | 2.34E-01 | NS   |
| A_42_P523517 | FQ229104     |           |            |                                                                                              | 6.57E-01 | NS | 4.69E-02 | -1.6 | 1.15E-01 | NS   |
| A_42_P637189 | NM_031612    | 58812     | Apln       | apelin                                                                                       | 3.14E-01 | NS | 4.13E-03 | -1.6 | 3.47E-01 | NS   |
| A_44_P280799 | NM_001000654 | 404852    | Olr613     | olfactory receptor 613 similar to Leo1, Paf1/RNA polymerase II complex component, homolog    | 1.15E-01 | NS | 3.60E-02 | -1.6 | 2.55E-01 | NS   |
| A_64_P133957 | XM_001080079 | 691914    | LOC691914  |                                                                                              | 4.66E-01 | NS | 4.15E-02 | -1.6 | 8.34E-01 | NS   |
| A_64_P014685 | NM_001000029 | 287496    | Olr1492    | olfactory receptor 1492                                                                      | 6.09E-01 | NS | 3.07E-02 | -1.6 | 2.30E-01 | NS   |

|              |              |           |              |                                                                                                                    |          |    |          |      |          |      |
|--------------|--------------|-----------|--------------|--------------------------------------------------------------------------------------------------------------------|----------|----|----------|------|----------|------|
| A_44_P897884 | NM_001017492 | 498251    | Apobec4      | apolipoprotein B mRNA editing enzyme, catalytic polypeptide-like 4 (putative)                                      | 2.21E-01 | NS | 2.77E-02 | -1.6 | 3.41E-01 | NS   |
| A_44_P262645 | NM_001044230 | 290658    | Lass1        | LAG1 homolog, ceramide synthase 1                                                                                  | 2.03E-01 | NS | 1.10E-02 | -1.6 | 8.11E-01 | NS   |
| A_64_P111630 | NM_001013166 | 312793    | Gsg1         | germ cell associated 1                                                                                             | 2.81E-01 | NS | 2.04E-02 | -1.6 | 7.30E-01 | NS   |
| A_64_P119477 | NM_001000795 | 405079    | Olr1308      | olfactory receptor 1308                                                                                            | 7.86E-01 | NS | 2.03E-02 | -1.6 | 2.94E-01 | NS   |
| A_64_P302169 | NM_001099493 | 690816    | Vom2r24      | vomeronasal 2 receptor, 24                                                                                         | 9.75E-01 | NS |          | -1.6 | 6.81E-01 | NS   |
| A_64_P054446 | NM_001109385 | 679958    | LOC679958    | similar to CG10806-PB, isoform B                                                                                   | 8.08E-01 | NS | 3.20E-02 | -1.6 | 2.30E-01 | NS   |
| A_64_P056643 | XM_002726526 | 298051    | RGD1309291   | similar to RIKEN cDNA 4930547C10 potassium large conductance calcium-activated channel, subfamily M, beta member 1 | 1.03E-01 | NS | 1.60E-02 | -1.6 | 2.86E-02 | -2.0 |
| A_64_P045750 | NM_019273    | 29747     | Kcnmb1       |                                                                                                                    | 9.73E-01 | NS | 3.98E-02 | -1.6 | 5.32E-01 | NS   |
| A_64_P136061 | NM_133400    | 170912    | A1cf         | APOBEC1 complementation factor                                                                                     | 3.58E-01 | NS | 2.85E-02 | -1.6 | 2.23E-01 | NS   |
| A_64_P029102 | NM_001105883 | 288124    | Pvrl3        | poliovirus receptor-related 3                                                                                      | 3.44E-01 | NS | 3.94E-02 | -1.6 | 9.61E-01 | NS   |
| A_64_P098774 |              | 311743    | RGD1561394   | similar to MLTK-beta                                                                                               | 1.19E-01 | NS | 1.50E-03 | -1.6 | 3.70E-01 | NS   |
| A_64_P052791 | NM_138889    | 192248    | Cdh13        | cadherin 13                                                                                                        | 1.06E-01 | NS | 2.39E-02 | -1.6 | 3.53E-01 | NS   |
| A_44_P541262 | XM_001080760 | 691998    | LOC691998    | similar to NACHT, leucine rich repeat and PYD containing 1                                                         | 5.28E-01 | NS | 1.63E-02 | -1.6 | 5.56E-01 | NS   |
| A_64_P048301 | NM_001107760 | 311332    | Dll4         | delta-like 4 (Drosophila)                                                                                          | 6.73E-02 | NS | 1.17E-02 | -1.6 | 5.48E-01 | NS   |
| A_44_P255608 | NM_001098724 | 311562    | Necab3       | N-terminal EF-hand calcium binding protein 3                                                                       | 5.15E-01 | NS | 2.22E-02 | -1.6 | 7.41E-01 | NS   |
| A_43_P23237  | NM_001107108 | 304071    | Sim2         | single-minded homolog 2 (Drosophila)                                                                               | 7.19E-01 | NS | 4.61E-02 | -1.6 | 2.59E-02 | 4.0  |
| A_64_P108094 | XM_345205    |           |              |                                                                                                                    | 1.46E-01 | NS | 4.97E-02 | -1.6 | 9.10E-02 | NS   |
| A_43_P21037  | NM_001100901 | 362242    | Snta1        | syntrophin, acidic 1                                                                                               | 1.00E-01 | NS | 3.76E-02 | -1.6 | 8.55E-02 | NS   |
| A_64_P065922 | NM_022922    | 24849     | Tpi1         | triosephosphate isomerase 1                                                                                        | 3.69E-01 | NS | 1.51E-02 | -1.6 | 1.66E-01 | NS   |
| A_64_P134277 | XM_001076631 |           |              |                                                                                                                    | 5.49E-01 | NS | 5.00E-03 | -1.6 | 6.54E-01 | NS   |
| A_64_P158040 | NM_001009520 | 494240    | Vom1r76      | vomeronasal 1 receptor, 76                                                                                         | 6.73E-01 | NS | 1.44E-02 | -1.6 | 3.18E-01 | NS   |
| A_44_P431109 | NM_012969    | 25467     | Irs1         | insulin receptor substrate 1                                                                                       | 6.96E-02 | NS | 1.54E-04 | -1.6 | 6.30E-01 | NS   |
| A_44_P473557 | XM_002727671 |           |              |                                                                                                                    | 8.65E-01 | NS | 3.93E-02 | -1.6 | 6.67E-01 | NS   |
| A_42_P766165 | NM_001106142 | 291565    | Afap111      | actin filament associated protein 1-like 1 serine (or cysteine) peptidase inhibitor, clade F, member 2             | 3.43E-01 | NS | 3.42E-02 | -1.6 | 1.15E-01 | NS   |
| A_44_P762292 | NM_001011892 | 287527    | Serpinf2     |                                                                                                                    | 3.25E-01 | NS | 2.12E-02 | -1.6 | 2.79E-02 | 1.3  |
| A_43_P22322  | XR_008302    |           |              |                                                                                                                    | 5.08E-01 | NS | 2.78E-02 | -1.6 | 2.59E-01 | NS   |
| A_64_P397735 | XR_086356    | 100359554 | LOC100359554 | Cytochrome P450 2C26-like                                                                                          | 9.35E-02 | NS | 2.84E-02 | -1.6 | 1.26E-01 | NS   |
| A_64_P105303 | XM_227368    |           |              |                                                                                                                    | 4.53E-01 | NS | 2.36E-02 | -1.6 | 6.20E-01 | NS   |
| A_44_P480939 | NM_001107008 | 303212    | Znf287       | zinc finger protein 287                                                                                            | 2.69E-01 | NS | 3.44E-02 | -1.6 | 7.10E-01 | NS   |
| A_64_P093842 | NM_001001379 | 299553    | Olr1090      | olfactory receptor 1090                                                                                            | 8.67E-01 | NS | 4.98E-03 | -1.6 | 7.48E-01 | NS   |
| A_44_P459760 | NM_001108187 | 316001    | RGD1560778   | similar to RIKEN cDNA 6530418L21                                                                                   | 1.81E-01 | NS | 7.22E-03 | -1.6 | 3.22E-01 | NS   |
| A_64_P149129 | NM_012969    | 25467     | Irs1         | insulin receptor substrate 1                                                                                       | 1.01E-01 | NS | 2.60E-02 | -1.6 | 6.91E-01 | NS   |
| A_44_P637087 | NM_001122658 | 501125    | Fam178b      | family with sequence similarity 178, member B                                                                      | 7.80E-01 | NS | 1.14E-02 | -1.6 | 5.13E-01 | NS   |
| A_44_P550490 | NM_019282    | 50566     | Grem1        | gremlin 1, cysteine knot superfamily, homolog (Xenopus laevis)                                                     | 4.72E-01 | NS | 2.29E-04 | -1.6 | 3.13E-01 | NS   |
| A_44_P384698 | XM_216321    |           |              |                                                                                                                    | 6.26E-02 | NS | 4.75E-02 | -1.6 | 1.93E-02 | 2.2  |
| A_44_P384260 | NM_021595    | 59115     | Ninj2        | ninjurin 2                                                                                                         | 7.44E-01 | NS | 1.19E-02 | -1.6 | 1.85E-01 | NS   |
| A_64_P017500 | NM_214459    | 362284    | Phactr3      | phosphatase and actin regulator 3                                                                                  | 8.96E-01 | NS | 4.75E-02 | -1.6 | 7.98E-01 | NS   |
| A_64_P058883 | NM_012731    | 25054     | Ntrk2        | neurotrophic tyrosine kinase, receptor, type 2                                                                     | 7.80E-01 | NS | 5.31E-03 | -1.6 | 3.06E-01 | NS   |
| A_64_P072377 | XM_001067241 |           |              |                                                                                                                    | 1.52E-01 | NS | 2.32E-02 | -1.6 | 5.76E-01 | NS   |
| A_44_P497692 | XR_009418    |           |              |                                                                                                                    | 1.51E-01 | NS | 4.05E-02 | -1.6 | 2.41E-01 | NS   |
| A_64_P018736 | NM_001000494 | 302958    | Olr1369      | olfactory receptor 1369                                                                                            | 5.58E-01 | NS | 4.78E-02 | -1.6 | 5.07E-02 | NS   |
| A_44_P351461 | XM_001055576 | 291648    | Pcdhb11      | protocadherin beta 11                                                                                              | 7.59E-01 | NS | 1.03E-02 | -1.6 | 2.77E-01 | NS   |
| A_64_P042086 | NM_001108910 | 365222    | Lrfr1        | leucine rich repeat and fibronectin type III domain containing 1                                                   | 1.59E-01 | NS | 2.23E-02 | -1.6 | 3.83E-01 | NS   |
| A_44_P256301 | NM_019282    | 50566     | Grem1        | gremlin 1, cysteine knot superfamily, homolog (Xenopus laevis)                                                     | 9.66E-01 | NS | 1.86E-02 | -1.6 | 9.37E-02 | NS   |
| A_64_P060874 | NM_012774    | 25236     | Gpc3         | glypican 3                                                                                                         | 9.95E-01 | NS | 1.53E-02 | -1.6 | 3.64E-01 | NS   |
| A_64_P093507 | NM_153821    | 266813    | Prx1         | paired related homeobox 1                                                                                          | 2.59E-01 | NS | 4.58E-03 | -1.6 | 7.56E-01 | NS   |
| A_44_P267628 | XM_001073741 | 690226    | LOC690226    | similar to dehydrogenase/reductase (SDR family) member 7                                                           | 3.53E-01 | NS | 3.86E-02 | -1.6 | 2.11E-01 | NS   |
| A_43_P12257  | NM_022604    | 64536     | Esm1         | endothelial cell-specific molecule 1                                                                               | 1.18E-01 | NS | 1.15E-02 | -1.6 | 8.10E-03 | -2.9 |

|               |              |        |            |                                                                     |          |    |          |      |          |      |
|---------------|--------------|--------|------------|---------------------------------------------------------------------|----------|----|----------|------|----------|------|
| A_42_P516658  | NM_001024888 | 310614 | Gatad2b    | GATA zinc finger domain containing 2B                               | 7.95E-01 | NS | 5.92E-03 | -1.6 | 8.08E-01 | NS   |
| A_64_P108495  | NM_001000771 | 405046 | Olr1455    | olfactory receptor 1455                                             | 2.71E-01 | NS | 3.08E-02 | -1.6 | 2.91E-01 | NS   |
| A_64_P134183  | NM_001037514 | 641643 | Defb12     | defensin beta 12                                                    | 7.08E-01 | NS | 2.74E-02 | -1.6 | 9.13E-01 | NS   |
| A_44_P156774  | XM_344467    |        |            |                                                                     | 3.47E-01 | NS | 4.62E-02 | -1.6 | 4.10E-01 | NS   |
| A_44_P295789  | NM_012834    | 25304  | Comp       | cartilage oligomeric matrix protein                                 | 6.46E-01 | NS | 1.29E-02 | -1.6 | 6.55E-02 | NS   |
| A_64_P014302  | NM_019284    | 50568  | Cspg5      | chondroitin sulfate proteoglycan 5                                  | 2.00E-01 | NS | 1.60E-02 | -1.5 | 6.62E-01 | NS   |
| A_42_P707818  | XM_223107    | 305095 | Tmcc2      | transmembrane and coiled-coil domain family 2                       | 9.23E-01 | NS | 1.67E-02 | -1.5 | 5.06E-01 | NS   |
| A_64_P042596  | NM_001106854 | 300990 | RGD1307461 | similar to RIKEN cDNA 6430571L13 gene; similar to g20 protein       | 9.42E-02 | NS | 3.30E-02 | -1.5 | 4.78E-02 | 2.1  |
| A_64_P051104  | NM_001105967 | 289201 | Lmx1a      | LIM homeobox transcription factor 1 alpha                           | 5.56E-02 | NS | 1.87E-02 | -1.5 | 5.51E-01 | NS   |
| A_44_P383667  | NM_020089    | 56764  | LOC56764   | dnaj-like protein                                                   | 7.50E-02 | NS | 4.40E-02 | -1.5 | 3.50E-01 | NS   |
| A_64_P096244  | NM_053651    | 114109 | Nkx2-5     | NK2 transcription factor related, locus 5 (Drosophila)              | 1.60E-01 | NS | 4.92E-02 | -1.5 | 5.18E-01 | NS   |
| A_64_P122437  | XM_001060483 | 681146 | LOC681146  | hypothetical protein LOC681146                                      | 2.22E-01 | NS | 3.32E-02 | -1.5 | 1.71E-01 | NS   |
| A_44_P165643  | FQ225091     | 314251 | Sptb       | spectrin, beta, erythrocytic                                        | 1.42E-01 | NS | 2.88E-02 | -1.5 | 7.65E-02 | NS   |
| A_44_P372358  | NM_001000202 | 293369 | Olr223     | olfactory receptor 223                                              | 2.33E-01 | NS | 1.16E-02 | -1.5 | 4.26E-01 | NS   |
| A_44_P477406  | NM_012751    | 25139  | Slc2a4     | solute carrier family 2 (facilitated glucose transporter), member 4 | 6.79E-02 | NS | 2.58E-02 | -1.5 | 8.04E-02 | NS   |
| A_64_P064259  | XM_001076325 |        |            |                                                                     | 1.02E-01 | NS | 1.93E-02 | -1.5 | 5.58E-02 | NS   |
| A_44_P247880  | XM_001074265 | 116630 | Csf2       | colony stimulating factor 2 (granulocyte-macrophage)                | 2.21E-01 | NS | 4.74E-02 | -1.5 | 7.86E-01 | NS   |
| A_64_P045339  | NM_031358    | 83535  | Kcnj11     | potassium inwardly rectifying channel, subfamily J, member 11       | 7.28E-02 | NS | 4.25E-02 | -1.5 | 2.40E-01 | NS   |
| A_64_P057453  | NM_001037190 | 303448 | LOC303448  | similar to glyceraldehyde-3-phosphate dehydrogenase                 | 5.50E-02 | NS | 2.71E-02 | -1.5 | 3.19E-02 | 2.0  |
| A_64_P007578  | NM_001000851 | 405141 | Olr807     | olfactory receptor 807                                              | 1.44E-01 | NS | 1.95E-02 | -1.5 | 8.33E-01 | NS   |
| A_64_P008502  | NM_001109574 | 690294 | Tmem169    | transmembrane protein 169                                           | 8.19E-02 | NS | 2.81E-03 | -1.5 | 1.99E-02 | -2.7 |
| A_64_P008042  | NM_001012112 | 314457 | Ankrd9     | ankyrin repeat domain 9                                             | 1.97E-01 | NS | 1.76E-02 | -1.5 | 4.59E-01 | NS   |
| A_64_P258712  | XR_085886    |        |            |                                                                     | 2.38E-01 | NS | 3.50E-02 | -1.5 | 1.21E-01 | NS   |
| A_44_P686854  | NM_001100995 | 500874 | RGD1563224 | similar to 4930438D12Rik protein                                    | 1.98E-01 | NS | 5.08E-03 | -1.5 | 2.54E-01 | NS   |
| A_64_P120594  | NM_001099490 | 690680 | Vom2r15    | vomeroneasal 2 receptor, 15                                         | 1.90E-01 | NS | 4.98E-02 | -1.5 | 1.34E-01 | NS   |
| A_64_P130531  | NM_001134568 | 317617 | RGD1563666 | similar to chromosome X open reading frame 43                       | 1.82E-01 | NS | 4.42E-02 | -1.5 | 3.40E-01 | NS   |
| A_44_P552692  | NM_019287    | 54225  | Apop       | apolipoprotein B                                                    | 9.36E-01 | NS | 6.58E-03 | -1.5 | 5.90E-01 | NS   |
| A_64_P156960  | NM_001109008 | 367313 | Col6a3     | procollagen, type VI, alpha 3                                       | 1.01E-01 | NS | 2.52E-02 | -1.5 | 3.72E-01 | NS   |
| A_64_P142759  | NM_001108590 | 362202 | Epb4.2     | erythrocyte protein band 4.2                                        | 1.14E-01 | NS | 3.05E-03 | -1.5 | 9.52E-01 | NS   |
| A_64_P143770  | XM_001081651 | 498019 | RGD1565238 | similar to glyceraldehyde-3-phosphate dehydrogenase                 | 8.97E-02 | NS | 1.55E-02 | -1.5 | 5.95E-02 | NS   |
| A_44_P1052080 | NM_001107291 | 306251 | Itih1      | inter-alpha trypsin inhibitor, heavy chain 1                        | 1.70E-01 | NS | 3.10E-03 | -1.5 | 6.91E-01 | NS   |
| A_44_P990998  | NM_001107509 | 308565 | Klk8       | kallikrein related-peptidase 8                                      | 7.27E-01 | NS | 4.81E-02 | -1.5 | 9.84E-02 | NS   |
| A_64_P161635  | NM_001047891 | 315963 | RGD1310507 | similar to RIKEN cDNA 1300017J02                                    | 2.38E-01 | NS | 2.48E-02 | -1.5 | 2.58E-01 | NS   |
| A_64_P096459  | NM_053716    | 114508 | Fbp2       | fructose-1,6-bisphosphatase 2                                       | 2.61E-01 | NS | 4.96E-02 | -1.5 | 1.97E-01 | NS   |
| A_44_P527054  | NM_001000019 | 287336 | Olr1448    | olfactory receptor 1448                                             | 7.76E-01 | NS | 4.55E-02 | -1.5 | 6.55E-01 | NS   |
| A_44_P408395  | NM_022228    | 63867  | Ugt2a1     | UDP glucuronosyltransferase 2 family, polypeptide A1                | 9.08E-01 | NS | 4.39E-02 | -1.5 | 5.44E-01 | NS   |
| A_64_P139295  | NM_001083811 | 29627  | Gria2      | glutamate receptor, ionotropic, AMPA 2                              | 4.96E-01 | NS | 4.18E-02 | -1.5 | 7.72E-01 | NS   |
| A_64_P004854  | NM_053321    | 58949  | Ptafr      | platelet-activating factor receptor                                 | 1.21E-01 | NS | 3.96E-03 | -1.5 | 9.27E-01 | NS   |
| A_64_P117160  | XM_001081683 | 688256 | LOC688256  | receptor beta                                                       | 9.79E-01 | NS | 2.35E-02 | -1.5 | 7.10E-01 | NS   |
| A_64_P103524  | NM_001108988 | 366836 | Ephx3      | epoxide hydrolase 3                                                 | 1.84E-01 | NS | 4.09E-02 | -1.5 | 1.34E-01 | NS   |
| A_44_P900672  | NM_032106    | 84409  | Robo2      | roundabout, axon guidance receptor, homolog 2 (Drosophila)          | 3.71E-01 | NS | 4.95E-02 | -1.5 | 6.32E-01 | NS   |
| A_64_P145712  | XM_233772    |        |            |                                                                     | 1.12E-01 | NS | 3.00E-02 | -1.5 | 3.71E-02 | 2.0  |
| A_64_P074904  | NM_001109093 | 498416 | Grb10      | growth factor receptor bound protein 10                             | 9.85E-02 | NS | 1.26E-02 | -1.5 | 2.16E-01 | NS   |
| A_44_P100716  | NM_001110810 | 291926 | Myk3       | myosin light chain kinase 3                                         | 1.33E-01 | NS | 1.65E-03 | -1.5 | 5.32E-02 | NS   |
| A_64_P061971  | XM_223850    |        |            |                                                                     | 7.09E-02 | NS | 2.17E-02 | -1.5 | 7.03E-02 | NS   |
| A_64_P107406  | XM_215391    |        |            |                                                                     | 6.27E-02 | NS | 3.06E-02 | -1.5 | 2.66E-02 | 2.2  |
| A_64_P030066  | NM_001008961 | 494304 | Vom1r14    | vomeroneasal 1 receptor, 14                                         | 8.48E-01 | NS | 3.54E-02 | -1.5 | 2.91E-01 | NS   |
| A_44_P746333  | NM_001107639 | 309871 | Prdm1      | PR domain containing 1, with ZNF domain                             | 8.76E-01 | NS | 7.50E-03 | -1.5 | 9.54E-02 | NS   |

|               |              |        |            |                                                                                                          |          |    |          |      |          |     |
|---------------|--------------|--------|------------|----------------------------------------------------------------------------------------------------------|----------|----|----------|------|----------|-----|
| A_64_P020471  | XM_002725036 | 305705 | Lrrc3b     | leucine rich repeat containing 3B                                                                        | 8.06E-01 | NS | 3.48E-02 | -1.5 | 2.70E-01 | NS  |
| A_64_P011704  | NM_001033072 | 500959 | LOC500959  | triosephosphate isomerase similar to very large inducible GTPase 1 isoform A                             | 6.49E-02 | NS | 4.88E-02 | -1.5 | 4.63E-02 | 2.1 |
| A_64_P126365  | XM_001075550 | 499229 | LOC499229  |                                                                                                          | 9.08E-01 | NS | 3.16E-02 | -1.5 | 4.73E-01 | NS  |
| A_64_P005732  | XM_219208    |        |            |                                                                                                          | 6.16E-02 | NS | 1.35E-02 | -1.5 | 2.40E-02 | 1.9 |
| A_64_P157405  | NM_001108633 | 362384 | Reep1      | receptor accessory protein 1                                                                             | 1.10E-01 | NS | 4.54E-02 | -1.5 | 3.05E-01 | NS  |
| A_64_P044935  | XM_230014    |        |            |                                                                                                          | 1.29E-01 | NS | 2.68E-02 | -1.5 | 1.84E-02 | 2.0 |
| A_43_P10340   | XR_006986    |        |            |                                                                                                          | 9.64E-01 | NS | 2.47E-02 | -1.5 | 6.88E-01 | NS  |
| A_44_P255280  | NM_012764    | 25172  | Gata1      | GATA binding protein 1                                                                                   | 3.64E-01 | NS | 1.25E-02 | -1.5 | 9.09E-01 | NS  |
| A_64_P089763  | XM_344243    |        |            |                                                                                                          | 5.30E-02 | NS | 2.91E-02 | -1.5 | 1.45E-02 | 2.0 |
| A_64_P152542  | XM_221353    |        |            |                                                                                                          | 1.17E-01 | NS | 3.50E-02 | -1.5 | 7.08E-02 | NS  |
| A_64_P038414  | NM_017061    | 24914  | Lox        | lysyl oxidase                                                                                            | 9.86E-02 | NS | 1.65E-02 | -1.5 | 3.48E-01 | NS  |
| A_64_P084693  | XM_001081046 |        |            |                                                                                                          | 2.78E-01 | NS | 3.20E-02 | -1.5 | 8.75E-01 | NS  |
| A_64_P134283  | XM_237274    |        |            |                                                                                                          | 1.17E-01 | NS | 3.42E-02 | -1.5 | 4.38E-02 | 1.8 |
| A_44_P335415  | XM_228411    |        |            |                                                                                                          | 7.51E-02 | NS | 3.43E-02 | -1.5 | 6.60E-02 | NS  |
| A_44_P491824  | NM_133605    | 171140 | Camk2g     | calcium/calmodulin-dependent protein kinase II gamma                                                     | 8.24E-02 | NS | 4.02E-02 | -1.5 | 1.00E-01 | NS  |
| A_64_P036950  | NM_134328    | 113914 | Taar1      | trace-amine-associated receptor 1                                                                        | 3.52E-01 | NS | 2.51E-02 | -1.5 | 4.18E-01 | NS  |
| A_64_P114288  | NM_001000005 | 287262 | Olr1407    | olfactory receptor 1407                                                                                  | 5.35E-01 | NS | 9.62E-03 | -1.5 | 4.96E-01 | NS  |
| A_42_P751742  | NM_001135088 | 685474 | Zfp385a    | zinc finger protein 385A                                                                                 | 1.53E-01 | NS | 2.96E-02 | -1.5 | 2.03E-01 | NS  |
| A_64_P152543  | XM_221353    |        |            |                                                                                                          | 6.74E-02 | NS | 3.71E-02 | -1.5 | 2.47E-02 | 1.9 |
| A_44_P206326  | NM_001106937 | 302369 | Tbx22      | T-box 22                                                                                                 | 4.96E-01 | NS | 4.21E-02 | -1.5 | 4.09E-01 | NS  |
| A_64_P057452  | XM_228193    |        |            |                                                                                                          | 1.37E-01 | NS | 2.07E-02 | -1.5 | 7.16E-02 | NS  |
| A_64_P051019  | XM_228999    |        |            |                                                                                                          | 1.17E-01 | NS | 2.78E-02 | -1.5 | 8.06E-02 | NS  |
| A_44_P456769  | NM_057199    | 117547 | Ncr1       | natural cytotoxicity triggering receptor 1                                                               | 2.52E-01 | NS | 1.06E-02 | -1.5 | 8.44E-01 | NS  |
| A_64_P026226  | NM_001170606 | 361319 | Spink5     | serine peptidase inhibitor, Kazal type 5                                                                 | 8.76E-01 | NS | 3.57E-02 | -1.5 | 5.26E-01 | NS  |
| A_43_P13931   | NM_001105974 | 289264 | Grem2      | gremlin 2, cysteine knot superfamily, homolog (Xenopus laevis)                                           | 3.48E-01 | NS | 4.41E-02 | -1.5 | 2.63E-02 | 2.4 |
| A_44_P267454  | NM_001014049 | 311470 | Sel1l2     | sel-1 suppressor of lin-12-like 2 (C. elegans)                                                           | 8.59E-01 | NS | 2.52E-02 | -1.5 | 2.45E-01 | NS  |
| A_64_P089467  | XM_225042    |        |            |                                                                                                          | 2.15E-01 | NS | 1.47E-02 | -1.5 | 2.17E-02 | 1.7 |
| A_64_P049515  | XM_001059246 | 680866 | Tmem45a    | transmembrane protein 45A similar to methionine-R-sulfoxide reductase B3                                 | 2.49E-01 | NS | 2.01E-02 | -1.5 | 3.09E-01 | NS  |
| A_64_P121779  | XM_001081046 | 688073 | LOC688073  |                                                                                                          | 1.73E-01 | NS | 8.94E-03 | -1.5 | 6.51E-01 | NS  |
| A_44_P161470  | NM_001033076 | 613223 | Defa6      | defensin alpha 6                                                                                         | 5.51E-01 | NS | 3.00E-02 | -1.5 | 8.59E-02 | NS  |
| A_64_P003045  | XM_345008    |        |            |                                                                                                          | 7.24E-02 | NS | 2.90E-02 | -1.5 | 2.49E-02 | 1.7 |
| A_44_P1050480 | NM_053882    | 116662 | Ecm1       | extracellular matrix protein 1                                                                           | 3.81E-01 | NS | 2.97E-02 | -1.5 | 2.66E-01 | NS  |
| A_64_P042639  | NM_001109171 | 499430 | Lrrc20     | leucine rich repeat containing 20                                                                        | 1.34E-01 | NS | 4.37E-02 | -1.5 | 1.30E-01 | NS  |
| A_64_P085971  | NM_133391    | 362464 | Arntl2     | aryl hydrocarbon receptor nuclear translocator-like 2                                                    | 6.93E-02 | NS | 4.44E-02 | -1.5 | 6.04E-01 | NS  |
| A_44_P208640  | XM_345107    | 365577 | RGD1559810 | similar to hypothetical protein EGF-like module containing, mucin-like, hormone receptor-like sequence 4 | 2.74E-01 | NS | 3.64E-02 | -1.5 | 7.04E-01 | NS  |
| A_64_P021325  | NM_001007558 | 450235 | Emr4       | hormone receptor-like sequence 4                                                                         | 7.25E-01 | NS | 2.07E-02 | -1.5 | 5.16E-01 | NS  |
| A_44_P447394  | NM_019193    | 29361  | Sox10      | SRY (sex determining region Y)-box 10                                                                    | 2.18E-01 | NS | 3.66E-02 | -1.5 | 5.42E-01 | NS  |
| A_64_P028824  | XM_215798    |        |            |                                                                                                          | 1.13E-01 | NS | 2.46E-02 | -1.5 | 4.93E-02 | 1.6 |
| A_44_P196146  | NM_031349    | 83518  | Aplnr      | apelin receptor                                                                                          | 1.01E-01 | NS | 2.26E-04 | -1.5 | 4.50E-01 | NS  |
| A_64_P019125  | AABR03002941 |        |            |                                                                                                          | 7.88E-02 | NS | 4.01E-02 | -1.5 | 6.34E-02 | NS  |
| A_43_P14796   | XM_001063452 | 682861 | LOC682861  | similar to adenomatosis polyposis coli down-regulated 1                                                  | 6.10E-01 | NS | 1.20E-02 | -1.5 | 1.69E-01 | NS  |
| A_64_P053031  | BP491799     |        |            |                                                                                                          | 6.09E-01 | NS | 4.57E-02 | -1.5 | 2.51E-01 | NS  |
| A_64_P021878  | NM_001167664 | 501738 | LOC501738  | hypothetical LOC501738                                                                                   | 1.09E-01 | NS | 6.26E-04 | -1.5 | 1.70E-01 | NS  |
| A_44_P503115  | NM_001100700 | 310552 | Sfrp2      | secreted frizzled-related protein 2                                                                      | 7.65E-01 | NS | 2.50E-02 | -1.5 | 3.08E-01 | NS  |
| A_64_P131878  | XM_001056123 | 298233 | RGD1562966 | similar to zinc finger protein 352                                                                       | 7.34E-01 | NS | 3.08E-02 | -1.5 | 3.68E-01 | NS  |
| A_42_P641962  | NM_012999    | 25507  | Pcsk6      | proprotein convertase subtilisin/kexin type 6                                                            | 1.03E-01 | NS | 2.67E-02 | -1.5 | 1.64E-01 | NS  |
| A_64_P089733  | NM_001001364 | 288839 | Olr1051    | olfactory receptor 1051                                                                                  | 8.52E-01 | NS | 4.91E-02 | -1.5 | 7.01E-02 | NS  |
| A_64_P147106  | NM_001106211 | 292325 | B3gnt6     | UDP-GlcNAc:betaGal beta-1,3-N-acetylglucosaminyltransferase 6 (core 3 synthase)                          | 3.71E-01 | NS | 2.30E-03 | -1.5 | 9.52E-01 | NS  |
| A_43_P16141   | NM_130828    | 170672 | Nphs2      | nephrosis 2 homolog (human)                                                                              | 9.41E-01 | NS | 2.58E-02 | -1.5 | 7.97E-01 | NS  |

|               |              |        |            |                                                                 |          |    |          |      |          |      |
|---------------|--------------|--------|------------|-----------------------------------------------------------------|----------|----|----------|------|----------|------|
| A_64_P076555  | NM_001106630 | 297748 | Jph1       | junctophilin 1                                                  | 9.38E-01 | NS | 1.87E-02 | -1.5 | 9.44E-01 | NS   |
| A_64_P027858  | NM_001037190 | 303448 | LOC303448  | similar to glyceraldehyde-3-phosphate dehydrogenase             | 1.14E-01 | NS | 3.08E-02 | -1.5 | 9.30E-02 | NS   |
| A_44_P454343  | NM_001047960 | 500702 | LOC500702  | LRRGT00051                                                      | 9.29E-01 | NS | 3.62E-02 | -1.5 | 3.36E-01 | NS   |
| A_64_P030000  | EV763695     |        |            |                                                                 | 3.82E-01 | NS | 2.28E-02 | -1.5 | 5.59E-02 | NS   |
| A_44_P370319  | XM_219295    |        |            |                                                                 | 9.58E-02 | NS | 3.69E-02 | -1.5 | 2.22E-02 | 2.1  |
| A_44_P173370  | XM_228217    |        |            |                                                                 | 1.21E-01 | NS | 2.24E-02 | -1.5 | 3.47E-02 | 1.8  |
| A_44_P454532  | NM_012901    | 25377  | Ambp       | alpha-1-microglobulin/bikunin precursor                         | 7.49E-01 | NS | 4.00E-02 | -1.5 | 1.02E-01 | NS   |
| A_64_P002829  | XM_228801    |        |            |                                                                 | 8.70E-01 | NS | 4.92E-02 | -1.5 | 5.47E-01 | NS   |
| A_64_P076495  | XM_227696    |        |            |                                                                 | 7.69E-02 | NS | 2.57E-02 | -1.5 | 2.73E-02 | 1.8  |
| A_42_P780932  | NM_031348    | 83517  | Fcn1       | ficolin (collagen/fibrinogen domain containing) 1               | 1.24E-01 | NS | 1.56E-02 | -1.5 | 6.36E-01 | NS   |
| A_44_P1041460 | NM_001106641 | 297960 | Rragd      | Ras-related GTP binding D                                       | 5.34E-01 | NS | 4.20E-02 | -1.5 | 3.15E-01 | NS   |
| A_44_P900083  | NM_001109074 | 498274 | RGD1565283 | similar to novel protein                                        | 2.09E-01 | NS | 1.46E-02 | -1.5 | 6.15E-01 | NS   |
| A_44_P464960  | XM_001078202 | 497923 | Znf286a    | zinc finger protein 286A                                        | 9.13E-01 | NS | 1.12E-02 | -1.5 | 9.55E-01 | NS   |
| A_64_P036991  | NM_031766    | 83575  | Cpz        | carboxypeptidase Z                                              | 7.76E-01 | NS | 3.05E-02 | -1.5 | 9.53E-02 | NS   |
| A_64_P052510  | NM_017008    | 24383  | Gapdh      | glyceraldehyde-3-phosphate dehydrogenase                        | 9.90E-02 | NS | 2.77E-02 | -1.5 | 8.85E-02 | NS   |
| A_64_P118878  | XM_002728657 |        |            |                                                                 | 6.22E-01 | NS | 4.78E-02 | -1.5 | 7.53E-01 | NS   |
| A_64_P005029  | NM_001126093 | 685448 | Pcp411     | Purkinje cell protein 4-like 1                                  | 2.69E-01 | NS | 8.21E-03 | -1.5 | 9.60E-01 | NS   |
| A_44_P111759  | NM_001000956 | 405305 | Olr1456    | olfactory receptor 1456                                         | 3.59E-01 | NS | 3.62E-02 | -1.5 | 6.44E-02 | NS   |
| A_44_P451357  | NM_012656    | 24791  | Sparc      | secreted protein, acidic, cysteine-rich (osteonectin)           | 9.95E-01 | NS | 1.35E-02 | -1.5 | 6.36E-01 | NS   |
| A_44_P605194  | NM_001108295 | 360613 | Ccdc49     | coiled-coil domain containing 49                                | 8.57E-02 | NS | 3.37E-02 | -1.5 | 7.17E-01 | NS   |
| A_44_P715330  | NM_001024966 | 287637 | Samd14     | sterile alpha motif domain containing 14                        | 4.52E-01 | NS | 2.12E-02 | -1.4 | 3.13E-01 | NS   |
| A_64_P004869  | NM_175587    | 294130 | Taar7h     | trace amine-associated receptor 7h                              | 6.40E-01 | NS | 3.19E-02 | -1.4 | 8.40E-01 | NS   |
| A_44_P671089  | NM_001101680 | 171356 | Foxc2      | forkhead box C2                                                 | 1.36E-01 | NS | 6.64E-04 | -1.4 | 3.70E-01 | NS   |
| A_44_P302179  | XM_001070842 | 294691 | Naip5      | NLR family, apoptosis inhibitory protein 5                      | 9.43E-01 | NS | 4.76E-02 | -1.4 | 4.25E-02 | -1.6 |
| A_64_P005997  | XM_001075473 |        |            |                                                                 | 6.68E-01 | NS | 4.01E-02 | -1.4 | 4.38E-01 | NS   |
| A_44_P422356  | XM_001073650 |        |            |                                                                 | 7.46E-01 | NS | 2.54E-02 | -1.4 | 2.46E-01 | NS   |
| A_44_P493802  | NM_019264    | 29699  | Prkar2a    | protein kinase, cAMP dependent regulatory, type II alpha        | 3.94E-01 | NS | 1.11E-02 | -1.4 | 9.75E-01 | NS   |
| A_64_P091254  | NM_001106254 | 292852 | Klk7       | kallikrein-related peptidase 7                                  | 3.58E-01 | NS | 4.91E-02 | -1.4 | 2.12E-01 | NS   |
| A_64_P053114  | NM_001136151 | 432361 | Nrg2       | neuregulin 2                                                    | 3.14E-01 | NS | 3.24E-02 | -1.4 | 7.60E-01 | NS   |
| A_64_P139845  | XM_001070575 | 498198 | Cyp3a73    | cytochrome P450, family 3, subfamily a, polypeptide 73          | 6.05E-01 | NS | 1.75E-02 | -1.4 | 1.89E-01 | NS   |
| A_42_P544898  | NM_001108279 | 360551 | Bcl6b      | B-cell CLL/lymphoma 6, member B (zinc finger protein)           | 2.94E-01 | NS | 2.27E-04 | -1.4 | 3.87E-01 | NS   |
| A_64_P034769  | NM_017212    | 29477  | Mapt       | microtubule-associated protein tau                              | 8.96E-01 | NS | 1.28E-04 | -1.4 | 1.52E-01 | NS   |
| A_64_P110151  | XM_223741    |        |            |                                                                 | 8.90E-02 | NS | 2.19E-02 | -1.4 | 2.09E-02 | 2.0  |
| A_64_P015451  | NM_001100781 | 414065 | Nanog      | Nanog homeobox                                                  | 9.11E-01 | NS | 2.66E-02 | -1.4 | 4.05E-01 | NS   |
| A_42_P504549  | NM_001014191 | 362521 | Tmem38b    | transmembrane protein 38B                                       | 5.18E-02 | NS | 4.07E-02 | -1.4 | 1.63E-01 | NS   |
| A_44_P402980  | NM_001107558 | 309095 | Nkx6-2     | NK6 homeobox 2                                                  | 8.29E-01 | NS | 1.86E-02 | -1.4 | 7.57E-01 | NS   |
| A_42_P758454  | NM_001108101 | 314870 | Ilrak3     | interleukin-1 receptor-associated kinase 3                      | 6.75E-01 | NS | 1.16E-02 | -1.4 | 5.39E-01 | NS   |
| A_64_P085450  | NM_175599    | 319104 | Taar8a     | trace amine-associated receptor 8a                              | 4.54E-01 | NS | 1.65E-02 | -1.4 | 3.18E-01 | NS   |
| A_64_P001545  | XM_224877    |        |            |                                                                 | 7.26E-02 | NS | 1.14E-02 | -1.4 | 5.66E-01 | NS   |
| A_64_P104372  | XM_234433    |        |            |                                                                 | 5.59E-02 | NS | 2.29E-02 | -1.4 | 1.65E-02 | 2.1  |
| A_64_P072695  | NM_001109634 | 691286 | LOC691286  | similar to RIKEN cDNA 4930504O13                                | 8.82E-01 | NS | 4.06E-02 | -1.4 | 3.86E-01 | NS   |
| A_64_P133289  | DV725494     |        |            |                                                                 | 2.63E-01 | NS | 2.83E-03 | -1.4 | 7.46E-01 | NS   |
| A_64_P042312  | NM_001000432 | 300411 | Olr1151    | olfactory receptor 1151                                         | 7.23E-01 | NS | 4.24E-02 | -1.4 | 3.22E-01 | NS   |
| A_64_P113115  | NM_198727    | 288750 | Tmem132d   | transmembrane protein 132D                                      | 4.27E-01 | NS | 5.36E-03 | -1.4 | 2.94E-01 | NS   |
| A_64_P040483  | AF127390     |        |            |                                                                 | 9.88E-01 | NS | 1.91E-02 | -1.4 | 8.05E-01 | NS   |
| A_64_P070636  | XM_001071809 | 689730 | LOC689730  | similar to ubiquitin specific peptidase 17 (homolog)            | 8.91E-01 | NS | 3.22E-02 | -1.4 | 9.98E-01 | NS   |
| A_44_P1039927 | NM_001014088 | 315500 | Eepd1      | endonuclease/exonuclease/phosphatase family domain containing 1 | 2.02E-01 | NS | 1.77E-02 | -1.4 | 1.67E-01 | NS   |
| A_64_P069654  | NM_001013049 | 289734 | Smtn       | smoothelin                                                      | 8.82E-02 | NS | 3.59E-02 | -1.4 | 1.25E-01 | NS   |
| A_64_P036505  | XM_001081716 | 688272 | LOC688272  | similar to ring finger protein 157                              | 3.15E-01 | NS | 3.25E-03 | -1.4 | 9.99E-01 | NS   |
| A_64_P143695  | NM_001000074 | 288880 | Olr952     | olfactory receptor 952                                          | 5.45E-01 | NS | 3.47E-02 | -1.4 | 3.61E-01 | NS   |
| A_44_P295548  | XM_235346    |        |            |                                                                 | 1.99E-01 | NS | 2.87E-02 | -1.4 | 4.80E-02 | 1.8  |

|               |              |        |            |                                                                           |          |    |          |      |          |      |
|---------------|--------------|--------|------------|---------------------------------------------------------------------------|----------|----|----------|------|----------|------|
| A_44_P1054991 | XM_001056128 | 140589 | Gli1       | GLI family zinc finger 1                                                  | 5.70E-02 | NS | 1.81E-02 | -1.4 | 4.92E-01 | NS   |
| A_64_P094076  | NM_001000764 | 405038 | Olr312     | olfactory receptor 312                                                    | 8.70E-01 | NS | 2.57E-02 | -1.4 | 8.51E-01 | NS   |
| A_64_P098532  | NM_001029928 | 574531 | Lair1      | leukocyte-associated immunoglobulin-like receptor 1                       | 8.96E-01 | NS | 3.41E-02 | -1.4 | 4.98E-01 | NS   |
| A_64_P136031  | XM_001063442 |        |            |                                                                           | 3.51E-01 | NS | 1.68E-02 | -1.4 | 2.18E-02 | -2.3 |
| A_44_P575300  | XM_213991    |        |            |                                                                           | 4.43E-01 | NS | 3.19E-02 | -1.4 | 2.54E-02 | 2.1  |
| A_64_P068865  | NM_021587    | 59107  | Ltbp1      | latent transforming growth factor beta binding protein 1                  | 1.21E-01 | NS | 2.23E-02 | -1.4 | 2.33E-01 | NS   |
| A_64_P090777  | NM_001109389 | 680045 | LOC680045  | hypothetical protein LOC680045                                            | 5.69E-01 | NS | 3.70E-02 | -1.4 | 8.10E-01 | NS   |
| A_64_P136571  | NM_001134545 | 308341 | RGD1565772 | similar to hypothetical protein A430110N23                                | 7.96E-02 | NS | 4.95E-03 | -1.4 | 3.15E-01 | NS   |
| A_64_P232432  | NM_017008    | 24383  | Gapdh      | glyceraldehyde-3-phosphate dehydrogenase                                  | 9.18E-02 | NS | 3.35E-02 | -1.4 | 2.27E-02 | 1.8  |
| A_44_P196440  | NM_001113366 | 59322  | Cnksr2     | connector enhancer of kinase suppressor of Ras 2                          | 1.19E-01 | NS | 3.47E-02 | -1.4 | 9.74E-01 | NS   |
| A_44_P267465  | NM_001106177 | 291960 | Hsf4       | heat shock transcription factor 4                                         | 2.46E-01 | NS | 2.23E-02 | -1.4 | 1.96E-01 | NS   |
| A_64_P003046  | NM_017008    | 24383  | Gapdh      | glyceraldehyde-3-phosphate dehydrogenase                                  | 2.29E-01 | NS | 3.45E-02 | -1.4 | 1.73E-01 | NS   |
| A_44_P307625  | NM_013115    | 25652  | Ptgr       | prostaglandin F receptor                                                  | 8.62E-01 | NS | 2.09E-02 | -1.4 | 4.99E-01 | NS   |
| A_44_P330717  | XM_226873    | 294844 | LOC294844  | similar to Glyceraldehyde-3-phosphate dehydrogenase (GAPDH)               | 7.47E-02 | NS | 2.32E-02 | -1.4 | 3.70E-02 | 1.6  |
| A_64_P005148  | XM_002724831 | 685030 | LOC685030  | similar to paired immunoglobulin-like type 2 receptor beta                | 1.07E-01 | NS | 5.86E-03 | -1.4 | 1.92E-01 | NS   |
| A_64_P097888  |              | 688217 | LOC688217  | hypothetical protein LOC688217                                            | 4.21E-01 | NS | 2.55E-02 | -1.4 | 5.53E-02 | NS   |
| A_64_P063578  | XM_216715    |        |            |                                                                           | 7.33E-01 | NS | 5.50E-03 | -1.4 | 7.90E-01 | NS   |
| A_44_P445382  | XM_002724840 |        |            |                                                                           | 6.52E-01 | NS | 4.61E-02 | -1.4 | 5.24E-02 | NS   |
| A_42_P541962  | NM_001107745 | 311184 | C1qtnf4    | C1q and tumor necrosis factor related protein 4                           | 3.26E-01 | NS | 1.92E-02 | -1.4 | 8.06E-01 | NS   |
| A_44_P183784  | NM_057103    | 83425  | Akap12     | A kinase (PRKA) anchor protein 12                                         | 2.00E-01 | NS | 2.67E-02 | -1.4 | 1.92E-01 | NS   |
| A_42_P803752  | XM_580093    | 500612 | RGD1562146 | RGD1562146                                                                | 4.00E-01 | NS | 2.46E-02 | -1.4 | 1.25E-01 | NS   |
| A_64_P021206  | XM_001069167 | 689012 | LOC689012  | hypothetical protein LOC689012                                            | 6.61E-01 | NS | 7.21E-03 | -1.4 | 1.33E-01 | NS   |
| A_64_P019813  | XM_217999    | 308209 | RGD1561667 | similar to putative protein kinase                                        | 2.21E-01 | NS | 3.16E-02 | -1.4 | 4.76E-01 | NS   |
| A_64_P103681  | XR_008111    |        |            |                                                                           | 2.17E-01 | NS | 2.95E-02 | -1.4 | 7.48E-02 | NS   |
| A_44_P248542  | XM_234091    |        |            |                                                                           | 8.73E-02 | NS | 2.77E-02 | -1.4 | 1.50E-02 | 1.9  |
| A_64_P108913  | NM_001134592 | 365834 | RGD1565007 | similar to RIKEN cDNA 4632419K20                                          | 6.05E-01 | NS | 4.01E-02 | -1.4 | 2.16E-01 | NS   |
| A_64_P090339  | NM_001000756 | 405027 | Olr358     | olfactory receptor 358                                                    | 4.25E-01 | NS | 4.23E-02 | -1.4 | 7.22E-01 | NS   |
| A_64_P027833  | NM_053675    | 114210 | Spata2     | spermatogenesis associated 2                                              | 6.19E-01 | NS | 3.72E-02 | -1.4 | 1.31E-01 | NS   |
| A_44_P289080  | NM_017336    | 50677  | Ptpro      | protein tyrosine phosphatase, receptor type, O                            | 2.88E-01 | NS | 6.24E-03 | -1.4 | 1.03E-01 | NS   |
| A_64_P083999  | XM_001077073 | 499238 | RGD1564933 | similar to olfactory receptor Olf271 transmembrane and coiled-coil domain | 5.40E-01 | NS | 4.29E-02 | -1.4 | 1.76E-01 | NS   |
| A_64_P008121  | XM_001059693 | 305095 | Tmcc2      | family 2                                                                  | 9.67E-02 | NS | 2.55E-02 | -1.4 | 2.48E-01 | NS   |
| A_44_P279650  | NM_022195    | 60583  | Ivl        | involucrin                                                                | 5.92E-01 | NS | 1.04E-02 | -1.4 | 5.71E-01 | NS   |
| A_44_P684740  | NM_001107279 | 306055 | Pcdh17     | protocadherin 17                                                          | 2.39E-01 | NS | 1.90E-02 | -1.4 | 6.07E-03 | -2.3 |
| A_44_P203646  | XM_223044    |        |            |                                                                           | 8.43E-02 | NS | 4.04E-02 | -1.4 | 1.79E-02 | 2.4  |
| A_64_P152350  | XM_235078    |        |            |                                                                           | 7.62E-02 | NS | 4.25E-02 | -1.4 | 3.14E-02 | 1.8  |
| A_43_P20631   | XM_001079000 | 304469 | Rilp1      | Rab interacting lysosomal protein-like 1                                  | 6.05E-02 | NS | 1.16E-02 | -1.4 | 3.53E-02 | 1.6  |
| A_64_P080598  | NM_001047865 | 297832 | Cntnap5a   | contactin associated protein-like 5A                                      | 1.79E-01 | NS | 2.73E-02 | -1.4 | 5.87E-01 | NS   |
| A_42_P565301  | NM_001108608 | 362275 | B4gal5     | UDP-Gal:betaGlcNAc beta 1,4-galactosyltransferase, polypeptide 5          | 8.17E-01 | NS | 3.27E-03 | -1.4 | 5.09E-01 | NS   |
| A_64_P003491  | NM_001109549 | 689766 | LOC689766  | hypothetical protein LOC689766                                            | 5.22E-01 | NS | 4.91E-02 | -1.4 | 2.96E-02 | -3.1 |
| A_44_P121167  | XM_002728965 |        |            |                                                                           | 5.91E-02 | NS | 3.29E-03 | -1.4 | 2.93E-01 | NS   |
| A_44_P893293  | NM_001024317 | 499971 | LOC499971  | similar to hypothetical protein 4931409K22                                | 9.11E-01 | NS | 2.08E-02 | -1.4 | 5.95E-01 | NS   |
| A_64_P141742  | NM_139337    | 246233 | Macrod1    | MACRO domain containing 1                                                 | 7.49E-02 | NS | 4.09E-02 | -1.4 | 6.94E-02 | NS   |
| A_44_P423691  | NM_012976    | 25475  | Lgals5     | lectin, galactose binding, soluble 5                                      | 6.33E-01 | NS | 3.45E-02 | -1.4 | 9.47E-01 | NS   |
| A_64_P100033  | NM_001025666 | 304646 | RGD1310572 | similar to calmegin                                                       | 5.69E-01 | NS | 4.76E-02 | -1.4 | 8.70E-01 | NS   |
| A_44_P105441  | XM_233295    |        |            |                                                                           | 6.71E-02 | NS | 2.31E-02 | -1.4 | 2.75E-02 | 1.8  |
| A_64_P105019  | XR_008698    |        |            |                                                                           | 2.36E-01 | NS | 4.92E-02 | -1.4 | 2.30E-02 | 2.0  |
| A_43_P11839   | NM_017149    | 29279  | Meox2      | mesenchyme homeobox 2                                                     | 7.54E-01 | NS | 3.22E-03 | -1.4 | 9.16E-01 | NS   |
| A_64_P105318  | XR_085675    |        |            |                                                                           | 9.06E-01 | NS | 2.69E-04 | -1.4 | 8.50E-01 | NS   |
| A_64_P158793  | XM_219301    |        |            |                                                                           | 1.03E-01 | NS | 2.31E-02 | -1.4 | 7.31E-02 | NS   |



|              |              |           |              |                                                                                                    |          |    |          |      |          |     |
|--------------|--------------|-----------|--------------|----------------------------------------------------------------------------------------------------|----------|----|----------|------|----------|-----|
| A_64_P079628 | XM_576072    | 500692    | RGD1566220   | similar to hypothetical MGC48595                                                                   | 5.34E-01 | NS | 4.62E-02 | -1.4 | 8.53E-01 | NS  |
| A_64_P166460 | NM_032060    | 84007     | C3ar1        | complement component 3a receptor 1                                                                 | 2.56E-01 | NS | 1.25E-03 | -1.4 | 1.42E-01 | NS  |
| A_64_P039545 | XM_002730096 | 680787    | LOC680787    | rCG56785-like potassium channel tetramerisation domain containing 8                                | 6.44E-02 | NS | 3.41E-02 | -1.4 | 4.93E-01 | NS  |
| A_64_P048521 | NM_001100172 | 364148    | Kctd8        | containing 8                                                                                       | 2.47E-01 | NS | 2.69E-02 | -1.4 | 2.76E-01 | NS  |
| A_42_P618217 | NM_130752    | 170580    | Fgf21        | fibroblast growth factor 21                                                                        | 7.61E-01 | NS | 1.88E-02 | -1.4 | 2.25E-01 | NS  |
| A_64_P088841 | XM_001063571 |           |              |                                                                                                    | 4.35E-01 | NS | 3.71E-02 | -1.4 | 4.33E-01 | NS  |
| A_64_P043289 | NM_001107259 | 305835    | Peli2        | pellino 2                                                                                          | 2.95E-01 | NS | 3.00E-02 | -1.4 | 7.20E-01 | NS  |
| A_64_P019673 | NM_213629    | 367085    | Arhgap20     | Rho GTPase activating protein 20                                                                   | 1.66E-01 | NS | 4.13E-02 | -1.4 | 9.18E-01 | NS  |
| A_44_P987735 | NM_001106815 | 300656    | Trim29       | tripartite motif-containing 29                                                                     | 7.40E-01 | NS | 1.54E-02 | -1.4 | 3.46E-02 | 9.4 |
| A_64_P011664 | XM_228478    |           |              |                                                                                                    | 7.30E-02 | NS | 3.50E-02 | -1.4 | 3.07E-02 | 1.9 |
| A_64_P082012 | NM_001000772 | 405047    | Olr1453      | olfactory receptor 1453                                                                            | 1.65E-01 | NS | 3.08E-02 | -1.4 | 5.15E-01 | NS  |
| A_64_P060695 | NM_001107021 | 303310    | Hic1         | hypermethylated in cancer 1                                                                        | 5.55E-01 | NS | 4.50E-03 | -1.4 | 1.00E-01 | NS  |
| A_64_P095700 | XM_001077091 |           |              |                                                                                                    | 8.07E-01 | NS | 1.90E-02 | -1.4 | 3.21E-01 | NS  |
| A_64_P114693 | XM_343421    |           |              |                                                                                                    | 8.59E-02 | NS | 3.01E-02 | -1.4 | 5.43E-02 | NS  |
| A_42_P794052 | XM_001077260 |           |              |                                                                                                    | 1.27E-01 | NS | 3.84E-02 | -1.4 | 6.70E-01 | NS  |
| A_44_P838355 | NM_001106846 | 300920    | Cldn2        | claudin 2                                                                                          | 4.34E-01 | NS | 4.02E-02 | -1.4 | 4.29E-01 | NS  |
| A_44_P468694 | XM_225042    |           |              |                                                                                                    | 1.28E-01 | NS | 4.88E-02 | -1.4 | 4.62E-02 | 1.8 |
| A_64_P010643 | NM_001135088 | 685474    | Zfp385a      | zinc finger protein 385A                                                                           | 4.17E-01 | NS | 3.66E-02 | -1.4 | 4.53E-01 | NS  |
| A_64_P158123 | NM_001100524 | 295027    | Pcdh18       | protocadherin 18                                                                                   | 2.64E-01 | NS | 2.52E-02 | -1.4 | 2.55E-01 | NS  |
| A_64_P044757 | NM_001013110 | 24825     | Tf           | transferrin                                                                                        | 1.27E-01 | NS | 1.43E-02 | -1.4 | 2.34E-01 | NS  |
| A_64_P135387 | D28557       |           |              |                                                                                                    | 2.08E-01 | NS | 4.61E-02 | -1.4 | 1.53E-01 | NS  |
| A_64_P050921 | XM_001058944 | 307395    | Ablin3       | actin binding LIM protein family, member 3                                                         | 2.74E-01 | NS | 3.90E-02 | -1.4 | 2.09E-01 | NS  |
| A_64_P131122 | XR_086302    | 500895    | RGD1563870   | similar to CG3104-PA, isoform A microtubule associated serine/threonine kinase family member 4     | 4.50E-01 | NS | 4.57E-02 | -1.4 | 1.38E-01 | NS  |
| A_43_P17397  | XM_001063274 | 310040    | Mast4        | kinase family member 4                                                                             | 8.50E-01 | NS | 2.89E-02 | -1.4 | 8.98E-01 | NS  |
| A_64_P092419 | NM_053488    | 85250     | Col5a2       | collagen, type V, alpha 2                                                                          | 2.03E-01 | NS | 2.92E-02 | -1.4 | 5.75E-01 | NS  |
| A_44_P286484 | XM_001062053 | 363259    | Obsl1        | obscurin-like 1                                                                                    | 9.28E-02 | NS | 1.34E-02 | -1.4 | 5.35E-02 | NS  |
| A_64_P114950 | NM_001106906 | 301372    | Gpr45        | G protein-coupled receptor 45 family with sequence similarity 186, member B                        | 5.49E-01 | NS | 1.22E-02 | -1.4 | 5.06E-02 | NS  |
| A_64_P106042 | NM_001134633 | 500931    | Fam186b      | member B                                                                                           | 7.15E-02 | NS | 1.12E-02 | -1.4 | 1.26E-01 | NS  |
| A_44_P349089 | NM_001014786 | 298210    | Ifna1        | interferon-alpha 1                                                                                 | 3.36E-01 | NS | 3.47E-02 | -1.4 | 5.09E-01 | NS  |
| A_44_P147356 | XM_225859    |           |              |                                                                                                    | 2.45E-01 | NS | 4.39E-02 | -1.4 | 6.29E-02 | NS  |
| A_64_P000474 | XM_342125    |           |              |                                                                                                    | 3.60E-01 | NS | 3.73E-02 | -1.4 | 1.03E-01 | NS  |
| A_64_P021163 | XM_001056750 |           |              |                                                                                                    | 6.86E-01 | NS | 2.95E-02 | -1.4 | 3.42E-01 | NS  |
| A_44_P821699 | NM_001100993 | 499719    | LOC499719    | hypothetical LOC499719                                                                             | 9.52E-01 | NS | 1.88E-02 | -1.4 | 2.01E-01 | NS  |
| A_44_P314370 | XM_235981    |           |              |                                                                                                    | 9.39E-02 | NS | 4.00E-02 | -1.4 | 2.99E-02 | 2.1 |
| A_42_P788740 | NM_001106283 | 293154    | Folr2        | folate receptor 2 (fetal)                                                                          | 5.54E-02 | NS | 1.85E-02 | -1.4 | 4.58E-01 | NS  |
| A_64_P081100 | NM_001008760 | 360623    | Krt28        | keratin 28                                                                                         | 4.57E-01 | NS | 2.05E-02 | -1.4 | 2.89E-01 | NS  |
| A_64_P059954 | XM_216324    |           |              |                                                                                                    | 5.29E-01 | NS | 4.07E-02 | -1.4 | 2.21E-01 | NS  |
| A_44_P146518 | NM_032085    | 84032     | Col3a1       | collagen, type III, alpha 1                                                                        | 6.39E-01 | NS | 3.40E-02 | -1.4 | 4.28E-01 | NS  |
| A_64_P042142 | XM_002724594 |           |              |                                                                                                    | 5.59E-01 | NS | 4.16E-02 | -1.4 | 8.39E-01 | NS  |
| A_64_P142640 | XM_221997    | 288529    | Gjc3         | gap junction protein, gamma 3                                                                      | 2.14E-01 | NS | 2.28E-02 | -1.4 | 5.32E-01 | NS  |
| A_44_P440372 | NM_001000068 | 288851    | Olr1024      | olfactory receptor 1024                                                                            | 7.33E-01 | NS | 1.84E-02 | -1.4 | 2.61E-01 | NS  |
| A_64_P023122 | NM_001080208 | 498791    | Ucn3         | urocortin 3 (stresscopin)                                                                          | 3.51E-01 | NS | 2.19E-02 | -1.4 | 9.39E-02 | NS  |
| A_64_P079379 | NM_031826    | 689008    | Fbn2         | fibrillin 2                                                                                        | 4.84E-01 | NS | 1.84E-02 | -1.4 | 8.84E-01 | NS  |
| A_44_P525235 | NM_001108550 | 361945    | Postn        | periostin, osteoblast specific factor                                                              | 6.70E-02 | NS | 1.52E-02 | -1.4 | 4.55E-01 | NS  |
| A_44_P433783 | NM_001005892 | 366126    | Sfp1         | SFFV proviral integration 1 solute carrier family 22 (organic anion/urate transporter), member 12  | 2.28E-01 | NS | 2.04E-02 | -1.4 | 7.34E-01 | NS  |
| A_64_P155059 | NM_001034943 | 365398    | Slc22a12     | transporter), member 12                                                                            | 9.98E-01 | NS | 3.99E-02 | -1.4 | 4.97E-01 | NS  |
| A_44_P105078 | XM_002728645 | 100359988 | LOC100359988 | hypothetical protein LOC100359988                                                                  | 3.00E-01 | NS | 4.47E-02 | -1.4 | 2.51E-01 | NS  |
| A_64_P003639 | NM_001001279 | 365324    | Olr67        | olfactory receptor 67 potassium channel, subfamily K, member 15                                    | 9.57E-01 | NS | 4.72E-02 | -1.4 | 8.60E-02 | NS  |
| A_44_P479942 | NM_130813    | 156873    | Kcnk15       | autoimmune regulator                                                                               | 8.92E-01 | NS | 7.04E-03 | -1.4 | 4.05E-01 | NS  |
| A_44_P121703 | NM_001106379 | 294328    | Aire         | ADAM metalloproteinase with thrombospondin type 1 motif, 2                                         | 5.54E-01 | NS | 1.97E-02 | -1.4 | 3.95E-01 | NS  |
| A_44_P206526 | NM_001137622 | 287899    | Adamts2      | thrombospondin type 1 motif, 2                                                                     | 1.13E-01 | NS | 4.09E-02 | -1.4 | 4.22E-02 | 1.2 |
| A_64_P139290 | NM_001083811 | 29627     | Gria2        | glutamate receptor, ionotropic, AMPA 2 serine (or cysteine) peptidase inhibitor, clade G, member 1 | 7.46E-01 | NS | 3.36E-02 | -1.4 | 4.54E-01 | NS  |
| A_64_P080025 | NM_199093    | 295703    | Serping1     |                                                                                                    | 9.39E-01 | NS | 4.08E-02 | -1.4 | 4.90E-01 | NS  |

|              |              |        |            |                                                                                                                                                      |          |    |          |      |          |      |
|--------------|--------------|--------|------------|------------------------------------------------------------------------------------------------------------------------------------------------------|----------|----|----------|------|----------|------|
| A_64_P053907 | XM_002725344 | 688710 | LOC688710  | hypothetical protein LOC688710                                                                                                                       | 9.68E-01 | NS | 2.22E-02 | -1.4 | 8.87E-01 | NS   |
| A_43_P14771  | NM_019156    | 29169  | Vtn        | vitronectin                                                                                                                                          | 9.38E-01 | NS | 9.96E-03 | -1.4 | 4.47E-01 | NS   |
| A_44_P145005 | XM_342766    |        |            |                                                                                                                                                      | 1.48E-01 | NS | 4.06E-02 | -1.4 | 4.09E-02 | 2.2  |
| A_64_P142046 | NM_001106049 | 290365 | Nudt15     | nudix (nucleoside diphosphate linked moiety X)-type motif 15                                                                                         | 7.15E-01 | NS | 2.34E-02 | -1.4 | 6.41E-01 | NS   |
| A_64_P146772 | XM_001075996 | 691246 | Rnf207     | ring finger protein 207                                                                                                                              | 3.20E-01 | NS | 4.38E-03 | -1.4 | 4.45E-01 | NS   |
| A_64_P070999 | NM_181633    | 307475 | Gpr151     | G protein-coupled receptor 151                                                                                                                       | 9.73E-01 | NS | 2.89E-02 | -1.4 | 3.19E-01 | NS   |
| A_64_P143658 | XM_001066081 | 685990 | LOC685990  | hypothetical protein LOC685990                                                                                                                       | 4.61E-01 | NS | 4.43E-02 | -1.4 | 8.92E-01 | NS   |
| A_44_P513472 | XM_001059492 | 291174 | RGD1564243 | similar to brain Zn-finger protein                                                                                                                   | 4.20E-01 | NS | 2.93E-02 | -1.4 | 8.28E-02 | NS   |
| A_64_P165616 | NM_001107315 | 306506 | Pragmin    | pragma of Rnd2                                                                                                                                       | 8.44E-02 | NS | 2.25E-02 | -1.4 | 2.10E-01 | NS   |
| A_44_P101625 | NM_012920    | 25400  | Camk2a     | calcium/calmodulin-dependent protein kinase II alpha                                                                                                 | 1.44E-01 | NS | 3.78E-02 | -1.4 | 6.06E-01 | NS   |
| A_43_P14460  | NM_001105962 | 289104 | Prg4       | proteoglycan 4, (megakaryocyte stimulating factor, articular superficial zone protein, camptodactyly, arthropathy, coxa vara, pericarditis syndrome) | 9.71E-02 | NS | 2.25E-02 | -1.4 | 5.24E-02 | NS   |
| A_44_P465975 | NM_001001286 | 405366 | Olr378     | olfactory receptor 378                                                                                                                               | 7.47E-01 | NS | 4.38E-02 | -1.4 | 4.45E-01 | NS   |
| A_64_P010648 | NM_001105822 | 287562 | Ccl12      | chemokine (C-C motif) ligand 12                                                                                                                      | 4.66E-01 | NS | 2.67E-02 | -1.4 | 2.91E-02 | -1.7 |
| A_44_P605492 | NM_001017481 | 498028 | Ddc8       | differential display clone 8                                                                                                                         | 4.43E-01 | NS | 2.90E-02 | -1.4 | 2.47E-01 | NS   |
| A_64_P029962 | XM_001068086 | 363306 | LOC363306  | hypothetical protein LOC363306                                                                                                                       | 4.70E-01 | NS | 2.65E-03 | -1.4 | 7.04E-01 | NS   |
| A_64_P232377 | XR_009165    |        |            |                                                                                                                                                      | 6.69E-02 | NS | 3.50E-02 | -1.4 | 3.04E-02 | 1.9  |
| A_64_P032258 | XM_001069272 |        |            |                                                                                                                                                      | 3.58E-01 | NS | 4.38E-02 | -1.4 | 6.11E-01 | NS   |
| A_44_P547873 | NM_001001093 | 405987 | Olr1396    | olfactory receptor 1396                                                                                                                              | 4.71E-01 | NS | 2.71E-02 | -1.4 | 1.91E-01 | NS   |
| A_64_P081696 | NM_001100717 | 313978 | E2f6       | E2F transcription factor 6                                                                                                                           | 1.56E-01 | NS | 3.41E-02 | -1.4 | 8.35E-02 | NS   |
| A_44_P426529 | NM_001108491 | 361602 | Me3        | malic enzyme 3, NADP(+)-dependent, mitochondrial                                                                                                     | 2.42E-01 | NS | 2.92E-02 | -1.4 | 1.57E-01 | NS   |
| A_64_P076232 | XM_001072229 | 684861 | LOC684861  | similar to Indoleamine 2,3-dioxygenase (IDO) (Indoleamine-pyrrole 2,3-dioxygenase)                                                                   | 3.61E-01 | NS | 1.18E-02 | -1.4 | 3.64E-01 | NS   |
| A_44_P377024 | NM_001000632 | 404825 | Olr675     | olfactory receptor 675                                                                                                                               | 8.55E-01 | NS | 3.17E-02 | -1.4 | 2.17E-01 | NS   |
| A_64_P093245 | XM_002730012 | 367236 | Col19a1    | collagen, type XIX, alpha 1                                                                                                                          | 4.76E-01 | NS | 1.36E-02 | -1.4 | 2.91E-01 | NS   |
| A_64_P042157 | NM_001107473 | 308322 | Zim1       | zinc finger, imprinted 1                                                                                                                             | 5.21E-01 | NS | 2.15E-02 | -1.4 | 7.13E-01 | NS   |
| A_64_P046369 | NM_001105857 | 287877 | Pycr1      | pyrroline-5-carboxylate reductase 1                                                                                                                  | 4.50E-01 | NS | 4.82E-02 | -1.4 | 9.74E-01 | NS   |
| A_64_P080499 | XM_001066547 | 686101 | LOC686101  | hypothetical protein LOC686101                                                                                                                       | 9.55E-01 | NS | 4.26E-02 | -1.4 | 2.58E-01 | NS   |
| A_64_P045568 | NM_001037190 | 303448 | LOC303448  | similar to glyceraldehyde-3-phosphate dehydrogenase                                                                                                  | 2.73E-01 | NS | 4.13E-02 | -1.4 | 4.35E-01 | NS   |
| A_64_P100783 | NM_001107593 | 309387 | Cnnm1      | cyclin M1                                                                                                                                            | 8.21E-02 | NS | 3.41E-02 | -1.4 | 8.40E-01 | NS   |
| A_44_P945456 | NM_001108214 | 316351 | Npas2      | neuronal PAS domain protein 2                                                                                                                        | 7.33E-01 | NS | 2.92E-02 | -1.4 | 8.81E-01 | NS   |
| A_64_P068438 | NM_001000844 | 405133 | Olr818     | olfactory receptor 818                                                                                                                               | 6.54E-01 | NS | 5.79E-03 | -1.4 | 5.31E-01 | NS   |
| A_64_P017560 | NM_178103    | 290032 | Fam12b     | family with sequence similarity 12, member B (epididymal)                                                                                            | 9.80E-02 | NS | 1.04E-02 | -1.4 | 7.73E-01 | NS   |
| A_44_P410348 | NM_001106707 | 298784 | Nlrc4      | NLR family, CARD domain containing 4                                                                                                                 | 3.93E-01 | NS | 8.68E-03 | -1.4 | 7.70E-01 | NS   |
| A_64_P009582 | XM_214287    |        |            |                                                                                                                                                      | 1.13E-01 | NS | 4.42E-02 | -1.4 | 4.32E-02 | 1.6  |
| A_64_P112171 | NM_001109395 | 680203 | Pcdhb20    | protocadherin beta 20                                                                                                                                | 2.66E-01 | NS | 3.40E-02 | -1.4 | 8.37E-02 | NS   |
| A_44_P287842 | NM_138512    | 171518 | Cyp2c22    | cytochrome P450, family 2, subfamily c, polypeptide 22                                                                                               | 4.72E-01 | NS | 2.91E-02 | -1.4 | 3.54E-01 | NS   |
| A_44_P196679 | XM_001064362 | 317051 | RGD1311317 | similar to RIKEN cDNA 4930507C10                                                                                                                     | 5.75E-01 | NS | 2.66E-02 | -1.4 | 5.00E-01 | NS   |
| A_44_P367541 | NM_001001061 | 405949 | Olr671     | olfactory receptor 671                                                                                                                               | 8.57E-01 | NS | 8.71E-03 | -1.4 | 3.79E-02 | -1.4 |
| A_64_P001879 | XM_001061474 |        |            |                                                                                                                                                      | 5.17E-01 | NS | 3.96E-02 | -1.4 | 2.24E-01 | NS   |
| A_44_P150471 | NM_031696    | 64443  | Gpr88      | G-protein coupled receptor 88                                                                                                                        | 4.63E-01 | NS | 6.33E-03 | -1.4 | 1.72E-01 | NS   |
| A_44_P293104 | NM_001106137 | 291526 | Poli       | polymerase (DNA directed), iota                                                                                                                      | 7.46E-01 | NS | 4.86E-02 | -1.4 | 2.56E-01 | NS   |
| A_64_P009174 | NM_001000380 | 296663 | Olr397     | olfactory receptor 397                                                                                                                               | 3.45E-01 | NS | 3.57E-02 | -1.4 | 6.94E-02 | NS   |
| A_64_P035550 | NM_001000470 | 300620 | Olr1319    | olfactory receptor 1319                                                                                                                              | 7.60E-01 | NS | 1.95E-02 | -1.4 | 2.79E-01 | NS   |
| A_44_P463858 | XM_002729454 | 117095 | Bhlhe41    | basic helix-loop-helix family, member e41                                                                                                            | 2.33E-01 | NS | 4.08E-02 | -1.4 | 6.17E-01 | NS   |
| A_44_P386017 | NM_032081    | 84028  | Pnlipp1    | pancreatic lipase-related protein 1                                                                                                                  | 8.81E-01 | NS | 3.88E-02 | -1.4 | 1.49E-01 | NS   |
| A_44_P914607 | NM_001107881 | 312652 | Pplxnd1    | plexin D1                                                                                                                                            | 1.28E-01 | NS | 2.71E-02 | -1.4 | 1.39E-01 | NS   |
| A_64_P006848 | NM_001000054 | 288789 | Olr875     | olfactory receptor 875                                                                                                                               | 7.20E-01 | NS | 2.29E-02 | -1.4 | 3.61E-01 | NS   |
| A_64_P154367 | NM_001108980 | 366598 | Ferd3l     | Fer3-like (Drosophila)                                                                                                                               | 5.61E-01 | NS | 3.24E-02 | -1.4 | 4.96E-01 | NS   |
| A_64_P098552 | NM_001109653 | 691981 | Spem1      | spermatid maturation 1                                                                                                                               | 5.32E-02 | NS | 2.44E-02 | -1.4 | 6.05E-02 | NS   |
| A_44_P272301 | NM_001007002 | 313770 | Mxra8      | matrix-remodelling associated 8                                                                                                                      | 3.71E-01 | NS | 2.16E-03 | -1.4 | 6.73E-02 | NS   |

|              |              |        |            |                                                                                 |          |    |          |      |          |     |
|--------------|--------------|--------|------------|---------------------------------------------------------------------------------|----------|----|----------|------|----------|-----|
| A_64_P024070 | XM_001071338 |        |            |                                                                                 | 4.93E-01 | NS | 3.55E-02 | -1.4 | 3.34E-01 | NS  |
| A_64_P022555 | NM_001074368 | 497904 | RGD1566120 | similar to novel protein                                                        | 8.28E-01 | NS | 2.76E-02 | -1.4 | 3.16E-01 | NS  |
| A_64_P149651 | NM_001009505 | 494224 | LOC494224  | follicular dendritic cell secreted                                              | 8.52E-01 | NS | 3.23E-02 | -1.4 | 3.73E-01 | NS  |
| A_64_P116844 | AY321342     |        |            |                                                                                 | 7.47E-01 | NS | 4.39E-02 | -1.4 | 2.14E-01 | NS  |
| A_64_P075569 | NM_024365    | 64354  | Htr6       | 5-hydroxytryptamine (serotonin) receptor 6                                      | 6.48E-01 | NS | 4.29E-02 | -1.4 | 5.36E-01 | NS  |
| A_44_P397803 | NM_184047    | 373540 | Il18rap    | interleukin 18 receptor accessory protein                                       | 5.82E-01 | NS | 1.20E-02 | -1.4 | 5.79E-01 | NS  |
| A_64_P072288 | NM_001128183 | 366008 | Lcn8       | lipocalin 8                                                                     | 9.89E-01 | NS | 4.22E-02 | -1.4 | 8.19E-01 | NS  |
| A_64_P130269 | NM_001024253 | 303924 | Upk1b      | uropod protein 1B                                                               | 7.33E-01 | NS | 4.72E-02 | -1.3 | 6.34E-01 | NS  |
| A_64_P069633 | NM_001000587 | 366797 | Olr916     | olfactory receptor 916                                                          | 6.09E-01 | NS | 1.27E-02 | -1.3 | 2.40E-01 | NS  |
| A_64_P146243 | NM_001105745 | 116544 | Pou2f3     | POU class 2 homeobox 3                                                          | 4.33E-01 | NS | 4.88E-02 | -1.3 | 5.93E-01 | NS  |
| A_64_P049063 | FQ234320     |        |            |                                                                                 | 7.35E-01 | NS | 2.57E-02 | -1.3 | 5.43E-01 | NS  |
| A_64_P007767 | NM_001108132 | 315497 | Tbx20      | T-box 20                                                                        | 9.38E-01 | NS | 2.48E-02 | -1.3 | 2.03E-01 | NS  |
| A_64_P146165 | NM_001109164 | 499334 | RGD1560242 | similar to RIKEN cDNA 1700028P14                                                | 1.84E-01 | NS | 4.81E-02 | -1.3 | 1.71E-01 | NS  |
| A_64_P129943 | NM_001105712 | 24416  | Grm3       | glutamate receptor, metabotropic 3                                              | 9.90E-01 | NS | 2.56E-02 | -1.3 | 3.07E-01 | NS  |
| A_64_P077801 | NM_001108917 | 365314 | Lipt2      | lipoyl(octanoyl) transferase 2 (putative)                                       | 5.17E-01 | NS | 4.32E-02 | -1.3 | 3.58E-01 | NS  |
| A_44_P839920 | XM_217627    | 302810 | Bcor1      | BCL6 co-repressor-like 1                                                        | 2.09E-01 | NS | 4.45E-02 | -1.3 | 4.06E-01 | NS  |
| A_44_P684874 | NM_001107727 | 310900 | Mtpp       | microsomal triglyceride transfer protein                                        | 4.37E-01 | NS | 3.53E-02 | -1.3 | 2.29E-01 | NS  |
| A_44_P278408 | NM_199502    | 363455 | Chrd1      | kohjirin                                                                        | 5.02E-01 | NS | 3.89E-02 | -1.3 | 6.70E-01 | NS  |
| A_42_P729012 | NM_001011962 | 296616 | Cercam     | cerebral endothelial cell adhesion molecule                                     | 4.25E-01 | NS | 1.38E-02 | -1.3 | 4.85E-01 | NS  |
| A_64_P096071 | NM_001108506 | 361668 | Ebf3       | early B-cell factor 3                                                           | 2.33E-01 | NS | 4.72E-02 | -1.3 | 6.76E-01 | NS  |
| A_64_P093692 | NM_001077079 |        |            |                                                                                 | 3.84E-01 | NS | 4.59E-02 | -1.3 | 3.42E-01 | NS  |
| A_64_P119513 | XM_001000648 | 404844 | Olr633     | olfactory receptor 633                                                          | 9.99E-01 | NS | 1.26E-03 | -1.3 | 6.04E-01 | NS  |
| A_44_P203731 | XR_008080    |        |            |                                                                                 | 8.77E-01 | NS | 3.26E-02 | -1.3 | 3.33E-02 | 1.7 |
| A_64_P008371 | NM_001000848 | 405138 | Olr811     | olfactory receptor 811                                                          | 6.91E-01 | NS | 1.81E-02 | -1.3 | 2.70E-01 | NS  |
| A_64_P153277 | NM_001025706 | 316131 | Fem1a      | fem-1 homolog a (C. elegans)                                                    | 1.61E-01 | NS | 3.51E-02 | -1.3 | 3.65E-01 | NS  |
| A_64_P119846 | NM_144753    | 246271 | Fev        | FEV (ETS oncogene family)                                                       | 8.39E-01 | NS | 3.64E-02 | -1.3 | 7.58E-01 | NS  |
| A_64_P160787 | NM_001008912 | 494263 | V1rc20     | vomeroneasal 1 receptor, C20                                                    | 3.64E-01 | NS | 4.55E-02 | -1.3 | 3.49E-01 | NS  |
| A_43_P11537  | NM_012733    | 25056  | Rbp1       | retinol binding protein 1, cellular                                             | 9.63E-01 | NS | 2.14E-03 | -1.3 | 9.08E-01 | NS  |
| A_64_P124567 | NM_001108065 | 314612 | Shc2       | SHC (Src homology 2 domain containing)                                          | 2.66E-01 | NS | 2.71E-02 | -1.3 | 5.99E-01 | NS  |
| A_64_P030075 | NM_053497    | 85259  | Cnga1      | cyclic nucleotide gated channel alpha 1                                         | 7.76E-01 | NS | 3.11E-02 | -1.3 | 7.49E-01 | NS  |
| A_64_P114818 | XM_002727253 | 301606 | Espnl      | espin-like                                                                      | 7.43E-01 | NS | 3.10E-02 | -1.3 | 2.53E-01 | NS  |
| A_64_P038972 | NM_080409    | 140592 | Ppfia4     | protein tyrosine phosphatase, receptor type, f polypeptide (PTPRF), interacting | 8.28E-02 | NS | 4.76E-02 | -1.3 | 1.36E-02 | 1.8 |
| A_64_P026067 | NM_001000226 | 293429 | Olr279     | protein (liprin), alpha 4                                                       | 6.82E-01 | NS | 3.55E-02 | -1.3 | 9.43E-01 | NS  |
| A_42_P625713 | NM_001134504 | 311114 | Kihl23     | olfactory receptor 279                                                          | 4.10E-01 | NS | 1.71E-02 | -1.3 | 4.62E-01 | NS  |
| A_44_P378845 | NM_001108009 | 313874 | Rasgrp3    | kelch-like 23 (Drosophila)                                                      | 7.60E-01 | NS | 3.12E-02 | -1.3 | 1.91E-01 | NS  |
| A_44_P458918 | NM_001000889 | 405190 | Olr1689    | RAS guanyl releasing protein 3 (calcium and DAG-regulated)                      | 7.97E-01 | NS | 4.04E-02 | -1.3 | 6.74E-01 | NS  |
| A_64_P139063 | NM_001100806 | 683788 | LOC683788  | olfactory receptor 1689                                                         | 1.57E-01 | NS | 3.09E-02 | -1.3 | 9.97E-01 | NS  |
| A_44_P459870 | NM_001108323 | 360738 | RGD1310348 | similar to Fascin (Singed-like protein)                                         | 3.72E-01 | NS | 1.05E-02 | -1.3 | 2.86E-01 | NS  |
| A_42_P460351 | NM_001077674 | 364069 | Hlx        | similar to Ser/Thr-rich protein T10 in DGCR region                              | 4.12E-01 | NS | 3.73E-03 | -1.3 | 6.00E-01 | NS  |
| A_42_P543654 | NM_001109243 | 500221 | Fam176a    | H2.0-like homeobox                                                              | 9.36E-01 | NS | 7.78E-04 | -1.3 | 7.80E-01 | NS  |
| A_44_P550393 | XM_341456    | 57029  | Adam18     | family with sequence similarity 176, member A                                   | 8.54E-01 | NS | 3.00E-02 | -1.3 | 8.96E-01 | NS  |
| A_64_P083049 | XM_001075749 |        |            | ADAM metallopeptidase domain 18                                                 | 3.96E-01 | NS | 2.25E-02 | -1.3 | 3.23E-01 | NS  |
| A_64_P156523 | NM_001000670 | 404872 | Olr551     | similar to aldehyde dehydrogenase 8                                             | 5.72E-01 | NS | 4.74E-02 | -1.3 | 3.54E-01 | NS  |
| A_44_P128306 | XM_001065122 | 683474 | LOC683474  | family, member A1                                                               | 2.80E-01 | NS | 4.24E-02 | -1.3 | 6.19E-01 | NS  |
| A_64_P007200 | XM_574375    | 499088 | Dact3      | dapper, antagonist of beta-catenin,                                             | 8.04E-01 | NS | 3.24E-02 | -1.3 | 2.94E-01 | NS  |
| A_64_P152702 | XM_001055231 | 679994 | LOC679994  | homolog 3 (Xenopus laevis)                                                      | 6.79E-01 | NS | 2.52E-02 | -1.3 | 9.07E-01 | NS  |
| A_44_P414266 | NM_182738    | 308965 | Chp2       | similar to histone 1, H2ai                                                      | 1.02E-01 | NS | 1.81E-02 | -1.3 | 1.46E-01 | NS  |
| A_44_P698466 | NM_001109469 | 685472 | Lrrtm2     | calcineurin B homologous protein 2                                              | 6.18E-01 | NS | 2.41E-02 | -1.3 | 3.93E-01 | NS  |
| A_64_P144944 | NM_024159    | 79128  | Dab2       | leucine rich repeat transmembrane neuronal 2                                    | 4.85E-01 | NS | 1.18E-02 | -1.3 | 7.59E-01 | NS  |
| A_44_P510538 | NM_001000820 | 405108 | Olr1194    | disabled homolog 2 (Drosophila)                                                 | 7.77E-01 | NS | 4.85E-02 | -1.3 | 5.84E-02 | NS  |

|               |              |        |            |                                                                                                       |          |    |          |      |          |    |
|---------------|--------------|--------|------------|-------------------------------------------------------------------------------------------------------|----------|----|----------|------|----------|----|
| A_64_P039531  | NM_001034946 | 498284 | Itln1      | intelectin 1 (galactofuranose binding)                                                                | 2.50E-01 | NS | 2.55E-02 | -1.3 | 4.44E-01 | NS |
| A_43_P16057   | NM_173319    | 286985 | Vom2r31    | vomeronasal 2 receptor, 31                                                                            | 9.73E-01 | NS | 4.41E-02 | -1.3 | 3.31E-01 | NS |
| A_64_P020834  | NM_001109388 | 680039 | LOC680039  | hypothetical protein LOC680039                                                                        | 1.95E-01 | NS | 3.05E-02 | -1.3 | 6.05E-02 | NS |
| A_64_P075013  | NM_001134536 | 304458 | Tmem132b   | transmembrane protein 132B                                                                            | 6.26E-01 | NS | 4.61E-02 | -1.3 | 8.29E-01 | NS |
| A_64_P021266  | NM_001134504 | 311114 | Klhl23     | kelch-like 23 (Drosophila)                                                                            | 9.01E-02 | NS | 4.46E-02 | -1.3 | 1.05E-01 | NS |
| A_44_P227175  | XM_227211    |        |            |                                                                                                       | 8.35E-01 | NS | 1.61E-02 | -1.3 | 1.75E-01 | NS |
| A_64_P006294  | XM_001071084 | 689526 | LOC689526  | hypothetical protein LOC689526                                                                        | 5.74E-01 | NS | 4.01E-02 | -1.3 | 2.89E-01 | NS |
| A_42_P807697  | NM_212525    | 361537 | Tyrobp     | Tyro protein tyrosine kinase binding protein                                                          | 9.96E-01 | NS | 2.30E-02 | -1.3 | 5.53E-01 | NS |
| A_64_P093289  | NM_001000755 | 405026 | Olr360     | olfactory receptor 360                                                                                | 8.04E-01 | NS | 3.07E-02 | -1.3 | 5.31E-01 | NS |
| A_64_P033610  | NM_031771    | 83580  | Thbd       | thrombomodulin                                                                                        | 2.22E-01 | NS | 8.71E-03 | -1.3 | 3.17E-01 | NS |
| A_44_P974940  | XM_346007    | 367201 | RGD1562392 | similar to Sulfotransferase K1 (rSULT1C2)                                                             | 6.90E-01 | NS | 3.87E-02 | -1.3 | 3.55E-01 | NS |
| A_44_P286426  | XM_001070279 | 367152 | Foxl2      | forkhead box L2                                                                                       | 7.26E-01 | NS | 3.32E-02 | -1.3 | 1.48E-01 | NS |
|               |              |        |            | similar to Heat shock transcription factor, Y-linked (Heat shock transcription factor 2-like protein) |          |    |          |      |          |    |
| A_64_P153036  | XM_001057682 | 293913 | RGD1562644 | tripartite motif family-like 2                                                                        | 3.06E-01 | NS | 2.79E-02 | -1.3 | 6.81E-01 | NS |
| A_64_P094756  | XM_224883    | 290766 | Triml2     |                                                                                                       | 5.76E-01 | NS | 3.53E-02 | -1.3 | 3.32E-01 | NS |
| A_64_P078171  | XM_002727373 |        |            |                                                                                                       | 5.47E-01 | NS | 4.98E-02 | -1.3 | 5.98E-01 | NS |
| A_43_P12503   | NM_031079    | 81743  | Pde2a      | phosphodiesterase 2A, cGMP-stimulated                                                                 | 7.90E-01 | NS | 1.01E-03 | -1.3 | 4.28E-01 | NS |
| A_64_P092349  | NM_001000847 | 405137 | Olr812     | olfactory receptor 812                                                                                | 5.77E-01 | NS | 2.81E-02 | -1.3 | 5.35E-01 | NS |
| A_44_P388783  | NM_001003707 | 362432 | Clec4d     | C-type lectin domain family 4, member d                                                               | 9.62E-01 | NS | 3.02E-02 | -1.3 | 7.04E-02 | NS |
| A_64_P159310  | NM_020303    | 498654 | Adam5      | ADAM metalloproteinase domain 5 family with sequence similarity 81, member B                          | 5.65E-01 | NS | 4.74E-02 | -1.3 | 5.50E-01 | NS |
| A_42_P462317  | XM_001059199 | 309925 | Fam81b     |                                                                                                       | 3.51E-01 | NS | 4.58E-02 | -1.3 | 7.97E-01 | NS |
| A_64_P034342  | NM_001108931 | 365554 | RGD1560350 | similar to proteasome subunit iota                                                                    | 6.54E-01 | NS | 4.67E-02 | -1.3 | 2.85E-01 | NS |
| A_44_P1006717 | NM_001109513 | 688777 | Grpel2     | GrpE-like 2, mitochondrial                                                                            | 2.79E-01 | NS | 6.35E-03 | -1.3 | 5.82E-01 | NS |
| A_64_P007538  | NM_001108013 | 313954 | Matn3      | matrilin 3                                                                                            | 8.66E-01 | NS | 3.61E-02 | -1.3 | 7.58E-01 | NS |
|               |              |        |            | protein tyrosine phosphatase, receptor type, O                                                        |          |    |          |      |          |    |
| A_64_P100008  | NM_017336    | 50677  | Ptpro      |                                                                                                       | 1.10E-01 | NS | 2.27E-02 | -1.3 | 2.09E-01 | NS |
| A_42_P508984  | NM_001007729 | 360918 | Pf4        | platelet factor 4                                                                                     | 3.69E-01 | NS | 4.05E-02 | -1.3 | 2.28E-01 | NS |
| A_64_P006072  |              | 292820 | Znf536     | zinc finger protein 536                                                                               | 5.36E-01 | NS | 4.04E-02 | -1.3 | 4.05E-01 | NS |
| A_64_P054227  | NM_199490    | 291754 | Dsg4       | desmoglein 4                                                                                          | 3.23E-01 | NS | 3.60E-02 | -1.3 | 2.31E-01 | NS |
| A_64_P109392  | NM_001033674 | 306809 | Bicd2      | bicaudal D homolog 2 (Drosophila)                                                                     | 1.68E-01 | NS | 3.81E-02 | -1.3 | 5.71E-02 | NS |
| A_64_P092960  | NM_001000694 | 404899 | Olr16      | olfactory receptor 16                                                                                 | 2.61E-01 | NS | 3.15E-02 | -1.3 | 3.31E-01 | NS |
| A_64_P152558  | XM_001069975 |        |            |                                                                                                       | 8.33E-02 | NS | 1.31E-02 | -1.3 | 5.18E-01 | NS |
| A_42_P816479  | NM_022278    | 64045  | Glrx1      | glutaredoxin 1                                                                                        | 5.76E-01 | NS | 2.02E-02 | -1.3 | 8.38E-02 | NS |
| A_64_P038582  | NM_001024262 | 312727 | Tspan11    | tetraspanin 11                                                                                        | 7.21E-01 | NS | 4.16E-02 | -1.3 | 7.20E-01 | NS |
| A_64_P152602  | XM_001053679 | 309261 | Magea9     | melanoma antigen, family A, 9                                                                         | 1.46E-01 | NS | 2.12E-02 | -1.3 | 6.37E-01 | NS |
| A_44_P144828  | XM_345237    | 365851 | RGD1564513 | similar to TDPOZZ                                                                                     | 6.73E-01 | NS | 2.37E-02 | -1.3 | 1.06E-01 | NS |
|               |              |        |            | zinc finger with KRAB and SCAN domains 2                                                              |          |    |          |      |          |    |
| A_64_P160774  | XM_001079250 | 368120 | Zkscan2    |                                                                                                       | 7.90E-01 | NS | 2.51E-02 | -1.3 | 6.30E-01 | NS |
| A_44_P606394  | XM_001077477 |        |            |                                                                                                       | 5.17E-01 | NS | 2.59E-02 | -1.3 | 3.28E-01 | NS |
| A_43_P19907   | NM_001012125 | 315714 | Loxl1      | lysyl oxidase-like 1                                                                                  | 8.91E-02 | NS | 4.81E-02 | -1.3 | 7.99E-02 | NS |
| A_64_P098419  | XM_001080310 |        |            |                                                                                                       | 6.94E-01 | NS | 2.43E-02 | -1.3 | 3.96E-01 | NS |
| A_44_P260663  | NM_001130583 | 689069 | Parvg      | parvin, gamma                                                                                         | 8.22E-01 | NS | 3.46E-02 | -1.3 | 2.47E-01 | NS |
|               |              |        |            | solute carrier family 16, member 5 (monocarboxylic acid transporter 6)                                |          |    |          |      |          |    |
| A_64_P034572  | NM_001109568 | 690212 | Slc16a5    |                                                                                                       | 4.39E-01 | NS | 1.15E-02 | -1.3 | 8.80E-01 | NS |
| A_64_P098134  | NM_001000079 | 289240 | Olr1582    | olfactory receptor 1582                                                                               | 1.43E-01 | NS | 2.04E-02 | -1.3 | 2.89E-01 | NS |
| A_43_P12947   | NM_053828    | 116553 | Il13       | interleukin 13                                                                                        | 6.40E-01 | NS | 4.08E-02 | -1.3 | 2.19E-01 | NS |
| A_64_P025940  | NM_001012117 | 315034 | Fbxo43     | F-box protein 43                                                                                      | 3.68E-01 | NS | 4.57E-02 | -1.3 | 7.22E-02 | NS |
| A_64_P128842  | NM_199382    | 296973 | Bpgm       | 2,3-bisphosphoglycerate mutase                                                                        | 7.78E-01 | NS | 2.83E-02 | -1.3 | 9.11E-01 | NS |
| A_64_P114420  | NM_001001079 | 405969 | Olr1137    | olfactory receptor 1137                                                                               | 7.94E-01 | NS | 3.61E-02 | -1.3 | 1.26E-01 | NS |
| A_64_P162810  | NM_001108374 | 361032 | RGD1310110 | similar to 3632451O06Rik protein                                                                      | 7.36E-01 | NS | 2.10E-02 | -1.3 | 7.73E-01 | NS |
|               |              |        |            | solute carrier family 37 (glucose-6-phosphate transporter), member 4                                  |          |    |          |      |          |    |
| A_44_P1023264 | NM_031589    | 29573  | Slc37a4    | aminocarboxymuconate semialdehyde decarboxylase                                                       | 1.14E-01 | NS | 2.11E-02 | -1.3 | 4.71E-01 | NS |
| A_43_P13249   | NM_134372    | 171385 | Acmsd      |                                                                                                       | 9.45E-01 | NS | 2.81E-02 | -1.3 | 1.69E-01 | NS |
| A_64_P079523  | XM_234572    | 314478 | Ahnak2     | AHNAK nucleoprotein 2                                                                                 | 9.65E-02 | NS | 1.20E-02 | -1.3 | 6.40E-02 | NS |
| A_64_P034234  | XM_001064837 | 500982 | Bsx        | brain specific homeobox                                                                               | 6.48E-01 | NS | 4.60E-02 | -1.3 | 2.29E-01 | NS |
| A_42_P625157  | NM_001107250 | 305687 | Znf503     | zinc finger protein 503                                                                               | 6.41E-01 | NS | 3.78E-02 | -1.3 | 5.98E-01 | NS |

|              |              |        |             |                                                                                                                     |          |    |          |      |          |      |
|--------------|--------------|--------|-------------|---------------------------------------------------------------------------------------------------------------------|----------|----|----------|------|----------|------|
| A_44_P391732 | XM_001061708 | 298326 | RGD1566387  | similar to hypothetical protein                                                                                     | 4.98E-01 | NS | 2.81E-02 | -1.3 | 8.35E-01 | NS   |
| A_44_P457069 | XM_001064537 | 290589 | RGD1562641  | similar to hypothetical protein 4930474N05                                                                          | 9.31E-01 | NS | 2.81E-02 | -1.3 | 3.31E-01 | NS   |
| A_64_P099254 | NM_001007264 | 29623  | Ugt2b37     | UDP-glucuronosyltransferase 2 family, member 37                                                                     | 9.27E-01 | NS | 2.61E-02 | -1.3 | 2.41E-01 | NS   |
| A_44_P227551 | NM_001106870 | 301085 | Fyco1       | FYVE and coiled-coil domain containing 1 solute carrier family 6 (neurotransmitter transporter, dopamine), member 3 | 7.21E-02 | NS | 3.05E-02 | -1.3 | 4.68E-01 | NS   |
| A_44_P314969 | M80570       | 24898  | Slc6a3      | myristoylated alanine rich protein kinase C substrate                                                               | 6.41E-01 | NS | 4.07E-02 | -1.3 | 1.24E-01 | NS   |
| A_64_P088316 | XM_002728965 | 25603  | Marcks      |                                                                                                                     | 8.89E-01 | NS | 2.75E-03 | -1.3 | 2.86E-01 | NS   |
| A_64_P091528 | NM_001000808 | 405094 | Olr1246     | olfactory receptor 1246                                                                                             | 8.14E-01 | NS | 4.21E-02 | -1.3 | 4.41E-01 | NS   |
| A_64_P023694 | NM_001135913 | 685900 | Enthd1      | ENTH domain containing 1                                                                                            | 6.42E-01 | NS | 3.62E-02 | -1.3 | 9.67E-01 | NS   |
| A_44_P543157 | NM_001000815 | 405101 | Olr1213     | olfactory receptor 1213                                                                                             | 9.85E-01 | NS | 2.68E-02 | -1.3 | 7.22E-01 | NS   |
| A_64_P137481 | NM_031695    | 64442  | St3gal2     | ST3 beta-galactoside alpha-2,3-sialyltransferase 2                                                                  | 1.02E-01 | NS | 2.28E-02 | -1.3 | 2.52E-01 | NS   |
| A_64_P038592 | NM_001017497 | 498341 | Smr3a       | submaxillary gland androgen regulated protein 3A                                                                    | 2.38E-01 | NS | 2.65E-02 | -1.3 | 6.20E-01 | NS   |
| A_64_P146787 | NM_001014016 | 308428 | Irgc1       | immunity-related GTPase family, cinema 1                                                                            | 5.84E-01 | NS | 4.14E-02 | -1.3 | 1.71E-01 | NS   |
| A_42_P704784 | XM_001063734 | 293631 | Brsk2       | brain serine/threonine kinase 2                                                                                     | 6.62E-01 | NS | 3.15E-02 | -1.3 | 9.16E-01 | NS   |
| A_64_P160508 | NM_001047091 | 303489 | Hoxb2       | homeo box B2                                                                                                        | 6.69E-01 | NS | 2.71E-02 | -1.3 | 2.44E-01 | NS   |
| A_64_P117510 | NM_001107524 | 308739 | Rgma        | RGM domain family, member A                                                                                         | 8.75E-02 | NS | 4.38E-02 | -1.3 | 1.84E-01 | NS   |
| A_64_P083800 | XM_001058776 | 303817 | RGD1560559  | similar to RIKEN cDNA 2310042E22 cytochrome P450, family 26, subfamily b, polypeptide 4                             | 6.96E-01 | NS | 4.96E-02 | -1.3 | 1.70E-02 | 44.7 |
| A_42_P693964 | NM_181087    | 312495 | Cyp26b1     |                                                                                                                     | 4.10E-01 | NS | 3.19E-02 | -1.3 | 7.73E-01 | NS   |
| A_64_P097088 | XM_001080066 |        |             |                                                                                                                     | 9.00E-01 | NS | 4.77E-02 | -1.3 | 3.11E-01 | NS   |
| A_64_P008330 | NM_001000020 | 287343 | Olr1454     | olfactory receptor 1454                                                                                             | 7.86E-01 | NS | 1.11E-02 | -1.3 | 4.77E-02 | -1.7 |
| A_44_P553199 | XM_001074906 | 294188 | Olr1731     | olfactory receptor 1731                                                                                             | 1.85E-01 | NS | 3.71E-02 | -1.3 | 1.36E-01 | NS   |
| A_44_P214900 | NM_145779    | 252922 | Pzp         | pregnancy-zone protein                                                                                              | 7.30E-01 | NS | 4.82E-02 | -1.3 | 1.66E-01 | NS   |
| A_44_P137427 | NM_001000878 | 405177 | Olr1135     | olfactory receptor 1135                                                                                             | 8.51E-01 | NS | 3.06E-02 | -1.3 | 2.48E-01 | NS   |
| A_42_P626433 | NM_001135855 | 305974 | Scara5      | scavenger receptor class A, member 5 (putative)                                                                     | 7.04E-02 | NS | 3.79E-02 | -1.3 | 4.21E-02 | 1.8  |
| A_64_P004539 | NM_001012209 | 364302 | Rnase12     | ribonuclease, RNase A family, 12 (non-active)                                                                       | 6.86E-01 | NS | 4.52E-02 | -1.3 | 5.49E-01 | NS   |
| A_44_P523028 | XM_344727    |        |             |                                                                                                                     | 6.31E-01 | NS | 4.38E-02 | -1.3 | 2.47E-01 | NS   |
| A_64_P106563 | NM_053639    | 114097 | Ltc4s       | leukotriene C4 synthase                                                                                             | 1.26E-01 | NS | 4.84E-02 | -1.3 | 6.93E-01 | NS   |
| A_44_P156295 | NM_001000894 | 405196 | Olr1675     | olfactory receptor 1675                                                                                             | 5.13E-01 | NS | 3.24E-02 | -1.3 | 3.39E-01 | NS   |
| A_64_P015158 | FQ212420     |        |             |                                                                                                                     | 6.60E-01 | NS | 3.23E-02 | -1.3 | 2.61E-01 | NS   |
| A_44_P228928 | NM_053787    | 116469 | Trpv5       | transient receptor potential cation channel, subfamily V, member 5                                                  | 8.92E-01 | NS | 4.56E-02 | -1.3 | 2.75E-01 | NS   |
| A_64_P159807 | NM_001000273 | 294161 | Olr1691     | olfactory receptor 1691                                                                                             | 9.50E-01 | NS | 1.70E-02 | -1.3 | 5.17E-01 | NS   |
| A_64_P018076 | NM_031764    | 685781 | Ddr2        | discoidin domain receptor tyrosine kinase 2                                                                         | 8.03E-01 | NS | 4.56E-02 | -1.3 | 4.01E-01 | NS   |
| A_44_P165629 | NM_001001285 | 405071 | Olr131      | olfactory receptor 131                                                                                              | 2.47E-01 | NS | 4.87E-02 | -1.3 | 3.60E-01 | NS   |
| A_64_P021750 | NM_013105    | 25642  | Cyp3a23/3a1 | cytochrome P450, family 3, subfamily a, polypeptide 23/polypeptide 1                                                | 9.37E-01 | NS | 4.89E-02 | -1.3 | 3.03E-01 | NS   |
| A_44_P279116 | XM_002726450 | 312721 | Dyrk4       | dual-specificity tyrosine-(Y)-phosphorylation regulated kinase 4                                                    | 1.53E-01 | NS | 3.31E-02 | -1.3 | 4.86E-02 | -1.6 |
| A_64_P069734 | NM_019189    | 29331  | Hapln1      | hyaluronan and proteoglycan link protein 1 C1q and tumor necrosis factor related                                    | 5.91E-01 | NS | 3.77E-02 | -1.3 | 2.60E-01 | NS   |
| A_44_P975458 | NM_001034932 | 315114 | C1qtnf6     | protein 6                                                                                                           | 7.10E-01 | NS | 1.85E-02 | -1.3 | 6.74E-01 | NS   |
| A_44_P199107 | XM_345241    | 365857 | RGD1562545  | similar to TDPOZ2                                                                                                   | 6.58E-01 | NS | 2.95E-02 | -1.3 | 4.47E-01 | NS   |
| A_64_P330457 | NM_001099470 | 292417 | Vom2r11     | vomeroneasal 2 receptor, 11                                                                                         | 6.69E-01 | NS | 4.24E-02 | -1.3 | 2.91E-01 | NS   |
| A_64_P147029 | NM_001013171 | 314543 | Gulp1       | GULP, engulfment adaptor PTB domain containing 1                                                                    | 9.61E-01 | NS | 4.19E-02 | -1.3 | 3.86E-01 | NS   |
| A_64_P087930 | XM_226803    |        |             |                                                                                                                     | 3.95E-01 | NS | 3.92E-02 | -1.3 | 8.12E-03 | -1.8 |
| A_42_P495895 | NM_031024    | 81653  | Dbn1        | drebrin 1                                                                                                           | 1.61E-01 | NS | 2.15E-02 | -1.3 | 2.54E-01 | NS   |
| A_64_P062665 | NM_001170470 | 291770 | Chst9       | carbohydrate (N-acetylgalactosamine 4-O) sulfotransferase 9                                                         | 5.75E-01 | NS | 2.27E-02 | -1.3 | 6.59E-01 | NS   |
| A_64_P076967 | NM_001000004 | 287259 | Olr1409     | olfactory receptor 1409                                                                                             | 6.90E-01 | NS | 3.45E-02 | -1.3 | 7.62E-01 | NS   |
| A_44_P163337 | NM_001000463 | 300603 | Olr1302     | olfactory receptor 1302                                                                                             | 7.59E-01 | NS | 3.04E-02 | -1.3 | 2.48E-02 | -1.4 |

|              |              |           |              |                                                                                                    |          |    |          |      |          |     |
|--------------|--------------|-----------|--------------|----------------------------------------------------------------------------------------------------|----------|----|----------|------|----------|-----|
| A_42_P529550 | NM_139185    | 245986    | Gng8         | guanine nucleotide binding protein (G protein), gamma 8                                            | 6.29E-01 | NS | 9.04E-03 | -1.3 | 7.86E-01 | NS  |
| A_64_P059456 | NM_001105845 | 287745    | Plcd3        | phospholipase C, delta 3                                                                           | 6.29E-02 | NS | 1.47E-02 | -1.3 | 4.88E-01 | NS  |
| A_64_P135107 | NM_001098241 | 293621    | Hras         | Harvey rat sarcoma virus oncogene                                                                  | 1.34E-01 | NS | 3.98E-02 | -1.3 | 2.29E-01 | NS  |
| A_64_P038147 | NM_001025052 | 500825    | LOC500825    | hypothetical protein LOC500825                                                                     | 3.43E-01 | NS | 4.25E-02 | -1.3 | 2.35E-01 | NS  |
| A_44_P787848 | NM_001034004 | 619374    | Jam2         | junctional adhesion molecule 2                                                                     | 6.33E-01 | NS | 1.88E-02 | -1.3 | 3.42E-01 | NS  |
| A_64_P102039 | XM_001064972 |           |              |                                                                                                    | 5.31E-01 | NS | 2.14E-02 | -1.3 | 3.18E-02 | 1.8 |
| A_64_P040100 | XM_002725650 |           |              |                                                                                                    | 3.86E-01 | NS | 4.97E-02 | -1.3 | 2.42E-01 | NS  |
| A_64_P118273 | NM_001170593 | 290567    | Chat         | choline acetyltransferase                                                                          | 8.84E-02 | NS | 4.23E-02 | -1.3 | 4.52E-01 | NS  |
|              |              |           |              | interleukin 1 receptor accessory protein-like 1                                                    | 8.23E-01 | NS | 3.84E-02 | -1.3 | 2.59E-01 | NS  |
| A_64_P150311 | NM_177935    | 317553    | Il1rapl1     |                                                                                                    | 8.62E-01 | NS | 3.54E-02 | -1.3 | 5.48E-01 | NS  |
| A_44_P550133 | NM_172073    | 64509     | Tpbpa        | trophoblast specific protein alpha similar to aldehyde dehydrogenase 4 family, member A1           | 9.26E-01 | NS | 3.62E-02 | -1.3 | 8.70E-02 | NS  |
| A_64_P031640 | NM_001134698 | 641316    | LOC641316    |                                                                                                    | 9.85E-01 | NS | 4.97E-02 | -1.3 | 1.92E-01 | NS  |
| A_64_P099938 | NM_001000638 | 404831    | Olr652       | olfactory receptor 652                                                                             | 2.27E-01 | NS | 3.61E-02 | -1.3 | 7.71E-01 | NS  |
| A_64_P127392 | NM_001044249 | 362393    | Antxr1       | anthrax toxin receptor 1                                                                           | 7.88E-02 | NS | 3.07E-02 | -1.3 | 9.57E-01 | NS  |
| A_64_P095200 | NM_001001010 | 405384    | Olr283       | olfactory receptor 283 similar to QUAhog (hedgehog related) family member (qua-1)                  | 8.49E-01 | NS | 4.13E-02 | -1.3 | 2.67E-01 | NS  |
| A_64_P052071 | XM_001069720 | 689143    | LOC689143    | serine (or cysteine) peptidase inhibitor, clade A, member 3K                                       | 5.72E-01 | NS | 4.25E-02 | -1.3 | 3.91E-01 | NS  |
| A_64_P110234 | NM_012657    | 24794     | Serpina3k    |                                                                                                    | 4.58E-01 | NS | 4.57E-02 | -1.3 | 4.77E-01 | NS  |
| A_64_P045898 | XR_085677    |           |              |                                                                                                    | 9.68E-01 | NS | 4.05E-02 | -1.3 | 3.32E-01 | NS  |
| A_64_P101770 | NM_001000074 | 288880    | Olr952       | olfactory receptor 952                                                                             | 8.31E-01 | NS | 2.13E-02 | -1.3 | 9.86E-01 | NS  |
| A_64_P073460 | NM_001100741 | 361821    | Col6a2       | collagen, type VI, alpha 2                                                                         | 8.58E-01 | NS | 4.17E-02 | -1.3 | 2.82E-01 | NS  |
| A_44_P466345 | XM_002728146 | 100362386 | LOC100362386 | CG56785-like                                                                                       | 8.03E-01 | NS | 2.38E-02 | -1.3 | 2.48E-01 | NS  |
| A_64_P144735 | XM_002725125 | 100363621 | LOC100363621 | hypothetical protein LOC100363621                                                                  |          |    |          |      |          |     |
| A_44_P898347 | NM_001109180 | 499579    | Dnajc5b      | DnaJ (Hsp40) homolog, subfamily C, member 5 beta                                                   | 7.92E-01 | NS | 3.59E-02 | -1.3 | 6.53E-01 | NS  |
|              |              |           |              | serine (or cysteine) peptidase inhibitor, clade A (alpha-1 antiproteinase, antitrypsin), member 12 | 8.51E-01 | NS | 3.31E-02 | -1.3 | 5.35E-02 | NS  |
| A_44_P288224 | NM_138825    | 191570    | Serpina12    |                                                                                                    | 5.38E-01 | NS | 2.38E-02 | -1.3 | 1.20E-02 | 1.7 |
| A_64_P031742 | XM_001061883 |           |              |                                                                                                    |          |    |          |      |          |     |
| A_64_P151393 | NM_021265    | 58808     | Mpp4         | membrane protein, palmitoylated 4 (MAGUK p55 subfamily member 4)                                   | 5.68E-01 | NS | 3.23E-02 | -1.3 | 2.00E-01 | NS  |
| A_44_P177575 | NM_001000331 | 295827    | Olr597       | olfactory receptor 597                                                                             | 9.40E-01 | NS | 4.00E-02 | -1.3 | 8.34E-02 | NS  |
|              |              |           |              | solute carrier family 25 (mitochondrial carrier; adenine nucleotide translocator), member 31       | 2.01E-01 | NS | 3.13E-02 | -1.3 | 3.92E-01 | NS  |
| A_64_P069447 | XM_001069558 | 689108    | Slc25a31     |                                                                                                    | 2.95E-01 | NS | 1.69E-02 | -1.3 | 2.25E-01 | NS  |
| A_64_P243132 | NM_001163921 | 685202    | Ccdc481      | coiled-coil domain containing 48-like1 similar to zinc finger and SCAN domain containing 4         | 9.75E-01 | NS | 4.03E-02 | -1.3 | 3.51E-01 | NS  |
| A_64_P127407 | XM_001079180 | 691661    | LOC691661    |                                                                                                    | 5.43E-01 | NS | 4.01E-02 | -1.3 | 2.18E-01 | NS  |
| A_44_P782405 | NM_001024288 | 499279    | LOC499279    | hypothetical gene supported by BC079265                                                            | 7.58E-01 | NS | 4.38E-02 | -1.3 | 1.07E-01 | NS  |
| A_64_P080627 | NM_001000460 | 300599    | Olr1293      | olfactory receptor 1293                                                                            | 7.48E-01 | NS | 2.66E-02 | -1.3 | 1.58E-01 | NS  |
| A_64_P074865 | XR_008898    | 502072    | RGD1565534   | similar to RING finger protein 33                                                                  | 6.49E-01 | NS | 3.61E-02 | -1.3 | 7.28E-01 | NS  |
| A_44_P407583 | NM_001108345 | 360849    | Kif14        | kinesin family member 14                                                                           |          |    |          |      |          |     |
|              |              |           |              | serine peptidase inhibitor, Kazal type 2 (acrosin-trypsin inhibitor)                               | 9.33E-01 | NS | 4.77E-02 | -1.3 | 2.38E-01 | NS  |
| A_64_P075858 | NM_001008870 | 408234    | Spink2       |                                                                                                    | 9.79E-02 | NS | 1.02E-02 | -1.3 | 2.15E-02 | 2.4 |
| A_64_P081982 | CR467520     |           |              |                                                                                                    | 3.41E-01 | NS | 4.54E-02 | -1.3 | 1.11E-01 | NS  |
| A_64_P038652 | XM_001076751 | 691074    | LOC691074    | hypothetical protein LOC691074                                                                     | 2.52E-01 | NS | 4.29E-02 | -1.3 | 1.34E-01 | NS  |
| A_64_P031113 | XM_001073804 | 502995    | RGD1565680   | similar to Hypothetical protein DJ1198H6.2                                                         | 6.91E-01 | NS | 4.60E-02 | -1.3 | 3.64E-01 | NS  |
| A_44_P477675 | NM_001000858 | 405150    | Olr1364      | olfactory receptor 1364                                                                            | 2.83E-01 | NS | 4.23E-02 | -1.3 | 2.67E-01 | NS  |
| A_64_P200747 | XM_002725730 | 24572     | Muc2         | mucin 2, oligomeric mucus/gel-forming family with sequence similarity 129, member A                | 6.13E-01 | NS | 3.28E-02 | -1.3 | 8.35E-01 | NS  |
| A_64_P068228 | NM_022242    | 63912     | Fam129a      |                                                                                                    | 3.03E-01 | NS | 1.81E-02 | -1.3 | 2.34E-01 | NS  |
| A_64_P148882 | NM_017195    | 29423     | Gap43        | growth associated protein 43                                                                       | 3.12E-01 | NS | 1.98E-02 | -1.3 | 5.96E-01 | NS  |
| A_64_P009255 | NM_001012091 | 311547    | Foxs1        | forkhead box S1                                                                                    | 7.66E-01 | NS | 3.30E-02 | -1.3 | 3.57E-01 | NS  |
| A_64_P158758 | NM_001105935 | 288736    | Foxn4        | forkhead box N4                                                                                    | 9.64E-01 | NS | 4.95E-02 | -1.3 | 2.60E-01 | NS  |
| A_64_P137862 | NM_001000565 | 366104    | Olr541       | olfactory receptor 541                                                                             | 8.92E-02 | NS | 1.92E-02 | -1.3 | 1.58E-01 | NS  |
| A_64_P034384 | NM_019227    | 29491     | Itsn1        | intersectin 1 (SH3 domain protein)                                                                 |          |    |          |      |          |     |

|              |              |        |            |                                                                                                                                                                |          |    |          |      |          |    |
|--------------|--------------|--------|------------|----------------------------------------------------------------------------------------------------------------------------------------------------------------|----------|----|----------|------|----------|----|
| A_64_P036459 | NM_001008903 | 494253 | Vom1r2     | vomeronasal 1 receptor, 2                                                                                                                                      | 6.85E-01 | NS | 4.85E-02 | -1.3 | 2.92E-01 | NS |
| A_64_P136736 | XM_001056051 | 548106 | Pcdhb19    | protocadherin beta 19                                                                                                                                          | 4.66E-01 | NS | 3.48E-02 | -1.3 | 1.80E-01 | NS |
| A_42_P800949 | NM_031787    | 83617  | Hipk3      | homeodomain interacting protein kinase 3<br>similar to MAP/microtubule affinity-<br>regulating kinase 4 (MAP/microtubule<br>affinity-regulating kinase like 1) | 1.21E-01 | NS | 2.96E-02 | -1.3 | 2.42E-01 | NS |
| A_64_P162442 | XM_001058976 | 366221 | RGD1561096 | UDP glucuronosyltransferase 2 family,<br>polypeptide B36                                                                                                       | 9.00E-01 | NS | 4.42E-02 | -1.3 | 6.59E-01 | NS |
| A_44_P236068 | NM_001004271 | 83808  | Ugt2b36    | polyprotein B36                                                                                                                                                | 6.72E-01 | NS | 3.72E-02 | -1.3 | 9.88E-02 | NS |
| A_64_P042367 | NM_001099496 | 691560 | Vom2r29    | vomeronasal 2 receptor, 29                                                                                                                                     | 4.45E-01 | NS | 4.37E-02 | -1.3 | 1.45E-01 | NS |
| A_64_P075532 | NM_172065    | 257651 | Prb1       | proline-rich protein BstNI subfamily 1                                                                                                                         | 6.50E-01 | NS | 3.66E-02 | -1.3 | 3.97E-01 | NS |
| A_64_P063420 | XM_001065540 | 305610 | RGD1561672 | similar to novel protein                                                                                                                                       | 2.55E-01 | NS | 3.31E-02 | -1.3 | 9.79E-02 | NS |
| A_64_P052670 | NM_001004080 | 296654 | Gsn        | gelsolin                                                                                                                                                       | 6.96E-01 | NS | 2.91E-02 | -1.3 | 2.25E-01 | NS |
| A_44_P374568 | NM_001107778 | 311427 | Hspa12b    | heat shock protein 12B                                                                                                                                         | 5.66E-01 | NS | 1.16E-03 | -1.3 | 6.76E-01 | NS |
| A_64_P118822 | NM_001000652 | 404849 | Olr621     | olfactory receptor 621                                                                                                                                         | 5.62E-02 | NS | 3.34E-02 | -1.3 | 5.96E-01 | NS |
| A_44_P365332 | NM_001001424 | 294196 | Olr1742    | olfactory receptor 1742                                                                                                                                        | 8.53E-01 | NS | 4.08E-02 | -1.3 | 1.43E-01 | NS |
| A_64_P145092 | NM_001000448 | 300565 | Olr1240    | olfactory receptor 1240                                                                                                                                        | 9.71E-01 | NS | 4.99E-02 | -1.3 | 8.01E-02 | NS |
| A_64_P132014 | NM_001107164 | 304666 | Klf1       | Kruppel-like factor 1 (erythroid)                                                                                                                              | 1.01E-01 | NS | 4.67E-02 | -1.3 | 2.44E-01 | NS |
| A_44_P238878 | NM_001173973 | 365946 | Nhedc2     | Na <sup>+</sup> /H <sup>+</sup> exchanger domain containing 2                                                                                                  | 6.89E-01 | NS | 4.05E-02 | -1.3 | 2.15E-01 | NS |
| A_64_P078376 | NM_001000382 | 296667 | Olr404     | olfactory receptor 404                                                                                                                                         | 6.92E-01 | NS | 4.50E-02 | -1.3 | 2.07E-01 | NS |
| A_44_P114833 | XM_001065392 | 302192 | LOC302192  | similar to RIKEN cDNA 1700001E04                                                                                                                               | 5.50E-01 | NS | 6.43E-03 | -1.3 | 6.41E-02 | NS |
| A_64_P047934 | NM_001001000 | 405364 | Olr161     | olfactory receptor 161                                                                                                                                         | 8.83E-01 | NS | 4.98E-02 | -1.3 | 8.32E-01 | NS |
| A_44_P163324 | NM_001000349 | 295876 | Olr669     | olfactory receptor 669                                                                                                                                         | 8.35E-01 | NS | 1.03E-02 | -1.3 | 9.81E-01 | NS |
| A_64_P023187 | NM_001000082 | 289250 | Olr1588    | olfactory receptor 1588                                                                                                                                        | 9.62E-01 | NS | 3.80E-02 | -1.3 | 9.61E-01 | NS |
| A_64_P004292 | NM_138536    | 171572 | Tti        | tubulin tyrosine ligase<br>limbic system-associated membrane<br>protein                                                                                        | 8.08E-02 | NS | 4.24E-02 | -1.3 | 6.81E-01 | NS |
| A_64_P037813 | NM_017242    | 29561  | Lsmp       | l(3)mbt-like (Drosophila)                                                                                                                                      | 6.42E-01 | NS | 1.56E-02 | -1.3 | 1.65E-01 | NS |
| A_64_P028175 | XM_001070026 | 311613 | L3mbtl     | l(3)mbt-like (Drosophila)                                                                                                                                      | 5.58E-01 | NS | 3.36E-02 | -1.3 | 1.78E-01 | NS |
| A_44_P160568 | NM_001108015 | 313974 | Trib2      | tribbles homolog 2 (Drosophila)                                                                                                                                | 4.80E-01 | NS | 2.06E-02 | -1.3 | 6.96E-02 | NS |
| A_64_P058584 | NM_001000063 | 288823 | Olr1071    | olfactory receptor 1071                                                                                                                                        | 6.22E-01 | NS | 3.85E-02 | -1.3 | 3.42E-01 | NS |
| A_64_P044119 | LOC681984    | 681984 | LOC681984  | hypothetical protein LOC681984<br>1-acylglycerol-3-phosphate O-<br>acyltransferase 5 (lysophosphatidic acid<br>acyltransferase, epsilon)                       | 9.71E-01 | NS | 4.95E-02 | -1.3 | 6.12E-01 | NS |
| A_43_P17088  | NM_001134744 | 306582 | Agpat5     | acyltransferase, epsilon                                                                                                                                       | 2.16E-01 | NS | 4.63E-02 | -1.3 | 5.75E-01 | NS |
| A_44_P501626 | XM_001079051 | 365544 | Umod1      | uromodulin-like 1                                                                                                                                              | 9.82E-01 | NS | 4.04E-02 | -1.3 | 6.54E-01 | NS |
| A_44_P776390 | NM_001039516 | 364241 | Kcnk5      | potassium channel, subfamily K, member 5                                                                                                                       | 8.36E-01 | NS | 3.64E-02 | -1.3 | 9.04E-02 | NS |
| A_64_P093262 | NM_001001100 | 405996 | Olr1529    | olfactory receptor 1529                                                                                                                                        | 6.44E-01 | NS | 3.65E-02 | -1.3 | 3.32E-01 | NS |
| A_42_P664544 | XM_001066941 | 363231 | Rftn2      | raftlin family member 2<br>sema domain, transmembrane domain<br>(TM), and cytoplasmic domain,                                                                  | 1.87E-01 | NS | 1.70E-02 | -1.3 | 1.45E-01 | NS |
| A_44_P622243 | NM_001107768 | 311384 | Sema6d     | (semaphorin) 6D                                                                                                                                                | 5.06E-01 | NS | 3.46E-02 | -1.3 | 1.32E-01 | NS |
| A_64_P123665 | XM_001077165 | 691192 | LOC691192  | hypothetical protein LOC691192<br>transmembrane phosphatase with tensin<br>homology                                                                            | 7.87E-01 | NS | 4.66E-02 | -1.3 | 8.47E-01 | NS |
| A_44_P121586 | NM_001108877 | 364629 | Tpte       | homology                                                                                                                                                       | 9.18E-01 | NS | 3.17E-02 | -1.3 | 3.21E-01 | NS |
| A_64_P003051 | NM_001000112 | 292561 | Olr5       | olfactory receptor 5                                                                                                                                           | 9.82E-01 | NS | 1.90E-02 | -1.3 | 8.78E-01 | NS |
| A_64_P091243 | XM_001077260 | 691221 | LOC691221  | similar to CG1998-PA                                                                                                                                           | 9.04E-01 | NS | 2.49E-02 | -1.3 | 1.90E-01 | NS |
| A_44_P391517 | NM_001034144 | 305999 | Nkx3-1     | NK3 homeobox 1                                                                                                                                                 | 3.83E-01 | NS | 2.56E-02 | -1.3 | 2.47E-01 | NS |
| A_64_P064357 | NM_001135087 | 681033 | Tessp1     | testis serine protease 1<br>cell division cycle 34 homolog (S.<br>cerevisiae)                                                                                  | 3.47E-01 | NS | 4.08E-02 | -1.3 | 7.11E-01 | NS |
| A_64_P152236 | NM_001013103 | 299602 | Cdc34      | cerevisiae)                                                                                                                                                    | 6.57E-01 | NS | 3.36E-02 | -1.3 | 2.20E-01 | NS |
| A_64_P017570 | NM_001000071 | 288861 | Olr1012    | olfactory receptor 1012                                                                                                                                        | 5.99E-01 | NS | 4.41E-02 | -1.3 | 9.70E-01 | NS |
| A_64_P118054 | NM_001037651 | 315806 | Prtg       | protogenin homolog (Gallus gallus)                                                                                                                             | 3.04E-01 | NS | 4.85E-02 | -1.3 | 3.70E-01 | NS |
| A_42_P502621 | NM_024401    | 79253  | Avil       | advillin                                                                                                                                                       | 8.22E-01 | NS | 1.69E-02 | -1.3 | 1.52E-01 | NS |
| A_44_P715030 | FQ212907     |        |            |                                                                                                                                                                | 6.23E-01 | NS | 4.09E-02 | -1.3 | 4.71E-01 | NS |
| A_64_P109958 | NM_001000469 | 300616 | Olr1315    | olfactory receptor 1315                                                                                                                                        | 8.38E-01 | NS | 4.29E-02 | -1.3 | 6.51E-01 | NS |
| A_64_P019205 | NM_001009718 | 494193 | Ly49i6     | Ly49 inhibitory receptor 6                                                                                                                                     | 9.85E-01 | NS | 3.37E-02 | -1.3 | 2.33E-01 | NS |
| A_64_P116058 | NM_001000640 | 404833 | Olr649     | olfactory receptor 649                                                                                                                                         | 7.42E-01 | NS | 4.95E-02 | -1.3 | 9.66E-02 | NS |
| A_43_P15023  | NM_031771    | 83580  | Thbd       | thrombomodulin                                                                                                                                                 | 8.51E-01 | NS | 2.84E-03 | -1.3 | 9.47E-01 | NS |
| A_64_P140926 | XM_001067649 |        |            |                                                                                                                                                                | 3.31E-01 | NS | 8.53E-03 | -1.3 | 9.86E-01 | NS |

|              |              |           |            |                                                                |          |    |          |      |          |      |
|--------------|--------------|-----------|------------|----------------------------------------------------------------|----------|----|----------|------|----------|------|
| A_64_P070942 | NM_001108999 | 367080    | Ankk1      | ankyrin repeat and kinase domain containing 1                  | 3.77E-01 | NS | 9.67E-03 | -1.3 | 7.22E-01 | NS   |
| A_44_P208936 | NM_001108838 | 363686    | C1q1       | complement component 1, q subcomponent-like 1                  | 8.28E-01 | NS | 1.47E-02 | -1.3 | 3.51E-01 | NS   |
| A_64_P100442 | XM_001069122 |           |            |                                                                | 2.86E-01 | NS | 3.25E-02 | -1.3 | 6.85E-01 | NS   |
| A_64_P115781 | NM_053484    | 85246     | Gas7       | growth arrest specific 7                                       | 6.11E-02 | NS | 1.91E-02 | -1.3 | 4.84E-01 | NS   |
| A_64_P097360 | NM_001107435 | 307900    | Kcng4      | potassium voltage-gated channel, subfamily G, member 4         | 3.67E-01 | NS | 3.78E-02 | -1.3 | 1.78E-01 | NS   |
| A_64_P087663 | NM_019237    | 29569     | Pcolce     | procollagen C-endopeptidase enhancer                           | 4.07E-01 | NS | 3.83E-02 | -1.3 | 1.02E-01 | NS   |
| A_64_P083349 | NM_021843    | 60427     | Kitlg      | KIT ligand                                                     | 1.68E-01 | NS | 3.12E-02 | -1.3 | 1.56E-03 | -1.6 |
| A_44_P323773 | NM_001013057 | 291283    | Akr1c2     | aldo-keto reductase family 1, member C2                        | 6.72E-01 | NS | 3.85E-02 | -1.3 | 2.35E-01 | NS   |
| A_64_P105947 | NM_001127561 | 499174    | Lass3      | LAG1 homolog, ceramide synthase 3                              | 2.64E-01 | NS | 3.86E-02 | -1.3 | 4.53E-01 | NS   |
| A_44_P472919 | NM_001100981 | 362562    | Agbl4      | ATP/GTP binding protein-like 4                                 | 6.18E-01 | NS | 4.86E-02 | -1.3 | 1.58E-01 | NS   |
| A_43_P16380  | NM_001000493 | 302954    | Olr1356    | olfactory receptor 1356                                        | 6.80E-01 | NS | 3.76E-02 | -1.3 | 7.97E-01 | NS   |
| A_64_P070979 | NM_001108258 | 317608    | Gpr101     | G protein-coupled receptor 101                                 | 7.91E-01 | NS | 4.04E-02 | -1.3 | 8.85E-01 | NS   |
| A_64_P097472 | NM_001000627 | 404819    | Olr701     | olfactory receptor 701                                         | 4.52E-01 | NS | 4.08E-02 | -1.3 | 3.58E-01 | NS   |
| A_64_P050650 | XM_344594    | 364712    | Sox4       | SRY (sex determining region Y)-box 4                           | 8.17E-01 | NS | 4.92E-02 | -1.3 | 3.76E-02 | -1.9 |
| A_44_P130286 | NM_012978    | 25477     | Lhcgr      | receptor                                                       | 4.12E-01 | NS | 4.38E-02 | -1.3 | 3.31E-01 | NS   |
| A_43_P16772  | NM_001109448 | 683897    | LOC683897  | similar to Protein C6orf203                                    | 1.10E-01 | NS | 4.16E-02 | -1.3 | 1.32E-01 | NS   |
| A_64_P135960 | NM_001109383 | 679942    | Angptl1    | angiopoietin-like 1                                            | 2.69E-01 | NS | 4.89E-02 | -1.3 | 2.82E-01 | NS   |
| A_64_P031501 | NM_173302    | 286961    | Slc22a9    | solute carrier family 22 (organic anion transporter), member 9 | 6.97E-01 | NS | 3.83E-02 | -1.3 | 2.87E-01 | NS   |
| A_64_P064498 | XM_001061848 | 684998    | LOC684998  | hypothetical protein LOC684998                                 | 1.37E-01 | NS | 2.48E-02 | -1.3 | 8.66E-01 | NS   |
| A_64_P119622 | NM_173289    | 24279     | Cryge      | crystallin, gamma E                                            | 9.70E-01 | NS | 4.54E-02 | -1.3 | 4.32E-01 | NS   |
| A_64_P041493 | XM_001061198 | 365857    | RGD1562545 | similar to TDPOZZ                                              | 7.15E-01 | NS | 2.36E-02 | -1.3 | 4.54E-02 | 1.5  |
| A_44_P473188 | XM_222991    |           |            |                                                                | 9.59E-01 | NS | 4.69E-02 | -1.3 | 6.09E-02 | NS   |
| A_42_P738431 | NM_019175    | 29245     | Klk6       | kallikrein related-peptidase 6                                 | 2.53E-01 | NS | 4.20E-02 | -1.3 | 1.83E-01 | NS   |
| A_44_P194083 | NM_001047921 | 100189555 | Sec61g1    | SEC61 gamma subunit-like                                       | 7.70E-01 | NS | 4.36E-02 | -1.3 | 6.47E-01 | NS   |
| A_64_P008387 | NM_001000842 | 405131    | Olr821     | olfactory receptor 821                                         | 7.92E-01 | NS | 2.33E-02 | -1.3 | 5.19E-01 | NS   |
| A_64_P090722 | XR_085886    | 687270    | LOC687270  | similar to glyceraldehyde-3-phosphate dehydrogenase            | 9.70E-01 | NS | 3.46E-02 | -1.3 | 1.28E-01 | NS   |
| A_64_P064983 | NM_001106939 | 302377    | RGD1560455 | similar to RIKEN cDNA A630033H20 gene                          | 9.68E-02 | NS | 4.49E-02 | -1.3 | 9.03E-01 | NS   |
| A_64_P109531 | BC100663     |           |            |                                                                | 5.07E-01 | NS | 1.46E-02 | -1.3 | 1.61E-02 | -1.7 |
| A_64_P151343 | NM_001000310 | 295759    | Olr495     | olfactory receptor 495                                         | 6.66E-01 | NS | 3.97E-02 | -1.3 | 2.96E-01 | NS   |
| A_64_P015723 | NM_001000918 | 405233    | Olr774     | olfactory receptor 774                                         | 4.43E-01 | NS | 4.60E-02 | -1.3 | 1.46E-01 | NS   |
| A_44_P606216 | NM_001134627 | 500537    | RGD1563015 | RGD1563015                                                     | 7.85E-01 | NS | 4.98E-02 | -1.3 | 5.88E-01 | NS   |
| A_64_P050515 | NM_001014107 | 317312    | Mospd1     | motile sperm domain containing 1                               | 9.04E-01 | NS | 4.34E-03 | -1.3 | 2.40E-01 | NS   |
| A_64_P117190 | NM_001109466 | 685365    | Fmo9       | flavin containing monooxygenase 9                              | 7.22E-01 | NS | 3.92E-02 | -1.3 | 6.44E-01 | NS   |
| A_44_P294838 | NM_017019    | 24493     | Il1a       | interleukin 1 alpha                                            | 8.33E-01 | NS | 4.81E-02 | -1.3 | 3.29E-01 | NS   |
| A_44_P149993 | NM_001033680 | 25716     | Syt1       | synaptotagmin I                                                | 8.78E-01 | NS | 4.57E-02 | -1.3 | 3.42E-01 | NS   |
| A_64_P001396 | XM_227358    |           |            |                                                                | 6.64E-01 | NS | 3.53E-02 | -1.3 | 4.85E-01 | NS   |
| A_64_P117799 | NM_012654    | 24784     | Slc9a3     | solute carrier family 9 (sodium/hydrogen exchanger), member 3  | 7.91E-01 | NS | 4.11E-02 | -1.3 | 3.52E-01 | NS   |
| A_44_P157087 | NM_001037783 | 314328    | LOC314328  | similar to chromosome 14 open reading frame 166B               | 5.94E-01 | NS | 3.60E-02 | -1.3 | 2.64E-01 | NS   |
| A_64_P007822 | NM_001109224 | 500048    | Fezf1      | Fez family zinc finger 1                                       | 7.69E-01 | NS | 4.45E-02 | -1.3 | 2.58E-01 | NS   |
| A_44_P459492 | NM_001037358 | 362176    | Lmo2       | LIM domain only 2                                              | 5.85E-01 | NS | 8.22E-03 | -1.3 | 4.69E-01 | NS   |
| A_64_P186630 | NM_001099480 | 501794    | Vom2r60    | vomer nasal 2 receptor, 60                                     | 5.50E-01 | NS | 4.80E-02 | -1.3 | 1.15E-01 | NS   |
| A_64_P138509 | NM_053656    | 114115    | P2rx2      | purinergic receptor P2X, ligand-gated ion channel, 2           | 3.35E-01 | NS | 4.91E-02 | -1.3 | 9.63E-01 | NS   |
| A_44_P178576 | NM_021686    | 59322     | Cnksr2     | connector enhancer of kinase suppressor of Ras 2               | 6.04E-01 | NS | 3.16E-02 | -1.3 | 6.07E-01 | NS   |
| A_42_P710324 | NM_001107252 | 305751    | Nkiras1    | NFKB inhibitor interacting Ras-like 1                          | 2.44E-01 | NS | 4.03E-02 | -1.3 | 7.89E-02 | NS   |
| A_64_P018081 | NM_031764    | 685781    | Ddr2       | discoidin domain receptor tyrosine kinase 2                    | 8.58E-01 | NS | 3.84E-02 | -1.3 | 6.07E-01 | NS   |
| A_44_P281468 | NM_001127556 | 365549    | RGD1563815 | similar to sodium-glucose cotransporter-like 1                 | 9.64E-01 | NS | 2.69E-02 | -1.3 | 9.33E-01 | NS   |
| A_64_P034774 | NM_017212    | 29477     | Mapt       | microtubule-associated protein tau                             | 3.69E-01 | NS | 1.51E-02 | -1.3 | 3.91E-01 | NS   |
| A_64_P087020 | XM_001058060 |           |            |                                                                | 2.40E-01 | NS | 4.02E-02 | -1.3 | 5.69E-02 | NS   |



|               |              |        |            |                                                                                                                |          |    |          |      |          |      |
|---------------|--------------|--------|------------|----------------------------------------------------------------------------------------------------------------|----------|----|----------|------|----------|------|
| A_64_P073620  | XM_346234    | 367632 | LOC367632  | similar to Spindlin-like protein 2 (SPIN-2)                                                                    | 5.16E-01 | NS | 3.81E-02 | -1.3 | 8.01E-02 | NS   |
| A_64_P041004  | NM_001108599 | 362252 | Scand1     | SCAN domain-containing 1                                                                                       | 8.86E-01 | NS | 2.93E-02 | -1.2 | 7.49E-02 | NS   |
| A_44_P893322  | XM_576413    | 501003 | RGD1563578 | similar to PGC7                                                                                                | 6.09E-01 | NS | 4.36E-02 | -1.2 | 2.74E-01 | NS   |
| A_43_P19019   | NM_001127490 | 315804 | Rfx7       | regulatory factor X, 7                                                                                         | 7.70E-01 | NS | 3.56E-02 | -1.2 | 1.42E-01 | NS   |
| A_64_P109292  | XM_001074644 |        |            |                                                                                                                | 8.29E-01 | NS | 4.40E-02 | -1.2 | 3.34E-01 | NS   |
| A_64_P065449  | NM_001001040 | 405926 | Olr313     | olfactory receptor 313                                                                                         | 3.07E-01 | NS | 1.98E-02 | -1.2 | 5.08E-01 | NS   |
| A_64_P129855  | NM_001134702 | 686117 | Meis1      | Meis homeobox 1                                                                                                | 9.51E-01 | NS | 1.93E-02 | -1.2 | 1.09E-01 | NS   |
| A_64_P112295  | NM_001108973 | 366432 | Slc1a7     | solute carrier family 1 (glutamate transporter), member 7<br>similar to microsomal glutathione S-transferase 3 | 3.77E-01 | NS | 4.72E-02 | -1.2 | 2.06E-01 | NS   |
| A_64_P016786  | BP483272     | 498340 | RGD1561381 | transferase 3                                                                                                  | 5.23E-01 | NS | 3.02E-02 | -1.2 | 6.85E-01 | NS   |
| A_44_P344187  | NM_001000779 | 405056 | Olr1424    | olfactory receptor 1424                                                                                        | 2.80E-01 | NS | 4.59E-02 | -1.2 | 8.91E-01 | NS   |
| A_64_P122663  | XM_001079880 |        |            |                                                                                                                | 7.17E-02 | NS | 2.51E-02 | -1.2 | 3.99E-01 | NS   |
| A_64_P028581  | XM_573389    | 498173 | Auts2      | autism susceptibility candidate 2                                                                              | 6.91E-02 | NS | 3.20E-02 | -1.2 | 7.21E-01 | NS   |
| A_64_P164335  | XM_001069494 | 361630 | Tead1      | TEA domain family member 1                                                                                     | 2.43E-01 | NS | 2.89E-02 | -1.2 | 9.99E-01 | NS   |
| A_44_P506497  | XM_001053696 |        |            |                                                                                                                | 9.18E-01 | NS | 2.81E-02 | -1.2 | 8.61E-01 | NS   |
| A_64_P041243  | XR_008044    |        |            |                                                                                                                | 5.58E-02 | NS | 3.72E-02 | -1.2 | 8.89E-01 | NS   |
| A_44_P190037  | XM_225822    |        |            |                                                                                                                | 5.87E-01 | NS | 4.68E-02 | -1.2 | 3.05E-01 | NS   |
| A_44_P345319  | NM_057134    | 117275 | Chrd       | chordin                                                                                                        | 9.67E-01 | NS | 3.40E-02 | -1.2 | 7.11E-01 | NS   |
| A_44_P473928  | NM_001106427 | 294981 | Spry1      | sprouty homolog 1, antagonist of FGF signaling (Drosophila)                                                    | 7.79E-01 | NS | 1.59E-02 | -1.2 | 4.70E-02 | 1.6  |
| A_44_P238803  | NM_001014792 | 361055 | Kpna3      | karyopherin alpha 3                                                                                            | 6.11E-01 | NS | 2.95E-02 | -1.2 | 3.50E-01 | NS   |
| A_44_P393852  | NM_001134736 | 292165 | Wdr63      | WD repeat domain 63                                                                                            | 2.52E-01 | NS | 5.00E-02 | -1.2 | 1.95E-01 | NS   |
| A_64_P104910  | NM_001000011 | 287318 | Olr1428    | olfactory receptor 1428                                                                                        | 5.26E-01 | NS | 4.26E-02 | -1.2 | 3.08E-01 | NS   |
| A_64_P007377  | NM_001105895 | 288291 | Prss7      | protease, serine, 7 (enterokinase)                                                                             | 7.79E-01 | NS | 4.35E-02 | -1.2 | 2.97E-01 | NS   |
| A_44_P162099  | NM_053296    | 25456  | Glrb       | glycine receptor, beta                                                                                         | 8.59E-01 | NS | 4.68E-02 | -1.2 | 2.66E-01 | NS   |
| A_44_P682742  | XM_001078306 |        |            |                                                                                                                | 3.44E-01 | NS | 3.77E-02 | -1.2 | 9.94E-01 | NS   |
| A_64_P127823  | NM_001108629 | 362368 | Ggct       | gamma-glutamyl cyclotransferase                                                                                | 7.55E-01 | NS | 3.56E-02 | -1.2 | 3.37E-03 | -1.9 |
| A_64_P009809  | NM_031563    | 500538 | Ybx1       | Y box binding protein 1                                                                                        | 2.55E-01 | NS | 3.43E-02 | -1.2 | 6.94E-02 | NS   |
| A_64_P185041  | XM_002725606 |        |            |                                                                                                                | 6.36E-01 | NS | 4.70E-02 | -1.2 | 2.47E-01 | NS   |
| A_44_P637299  | XM_343148    | 29454  | Gdf11      | growth differentiation factor 11                                                                               | 3.12E-01 | NS | 3.45E-02 | -1.2 | 7.74E-01 | NS   |
| A_64_P162387  | NM_001100901 | 362242 | Snta1      | syntrophin, acidic 1                                                                                           | 1.01E-01 | NS | 3.24E-02 | -1.2 | 7.77E-02 | NS   |
| A_44_P360590  | NM_001000650 | 404847 | Olr624     | olfactory receptor 624                                                                                         | 9.80E-01 | NS | 4.79E-02 | -1.2 | 5.05E-01 | NS   |
| A_64_P032112  | FQ215489     |        |            |                                                                                                                | 7.64E-01 | NS | 4.38E-02 | -1.2 | NS       | NS   |
| A_64_P158270  | NM_001107412 | 307667 | Hmgxb4     | HMG box domain containing 4                                                                                    | 1.04E-01 | NS | 3.92E-02 | -1.2 | 1.95E-02 | -1.8 |
| A_64_P105063  | NM_203333    | 361725 | Scgb2a2    | secretoglobin, family 2A, member 2<br>brain abundant, membrane attached signal protein 1                       | 6.88E-01 | NS | 4.37E-02 | -1.2 | 4.70E-01 | NS   |
| A_64_P012546  | NM_022300    | 64160  | Basp1      | family with sequence similarity 193, member B                                                                  | 8.87E-01 | NS | 4.14E-02 | -1.2 | 3.06E-01 | NS   |
| A_64_P028533  | NM_001170408 | 498703 | Fam193b    | potassium voltage-gated channel, delayed-rectifier, subfamily S, member 3                                      | 2.03E-01 | NS | 1.47E-02 | -1.2 | 8.80E-01 | NS   |
| A_44_P416938  | NM_031778    | 83588  | Kcns3      | solute carrier family 41, member 3                                                                             | 6.48E-01 | NS | 2.03E-02 | -1.2 | 9.46E-01 | NS   |
| A_44_P771052  | NM_001037492 | 641603 | Slc41a3    | delta-like 1 (Drosophila)                                                                                      | 2.40E-01 | NS | 2.22E-02 | -1.2 | 6.87E-02 | NS   |
| A_64_P130025  | NM_032063    | 84010  | Dll1       |                                                                                                                | 8.52E-02 | NS | 3.36E-02 | -1.2 | 2.82E-01 | NS   |
| A_44_P297625  | XM_001072159 |        |            |                                                                                                                | 3.79E-01 | NS | 4.63E-02 | -1.2 | 3.02E-01 | NS   |
| A_64_P071115  | XM_225207    | 306816 | Zfp169     | zinc finger protein 169<br>anterior pharynx defective 1 homolog B (C. elegans)                                 | 5.16E-01 | NS | 4.92E-02 | -1.2 | 7.73E-01 | NS   |
| A_64_P010135  | NM_001047090 | 300802 | Aph1b      | carbohydrate (chondroitin 4) sulfotransferase 12                                                               | 1.38E-01 | NS | 3.29E-02 | -1.2 | 5.83E-02 | NS   |
| A_44_P1003333 | NM_001037775 | 304322 | Chst12     | aldolase C, fructose-bisphosphate                                                                              | 2.48E-01 | NS | 1.93E-02 | -1.2 | 6.54E-02 | NS   |
| A_64_P056558  | NM_012497    | 24191  | Aldoc      | integrin, alpha E                                                                                              | 6.42E-01 | NS | 2.77E-02 | -1.2 | 4.34E-02 | 1.9  |
| A_44_P165494  | NM_031768    | 83577  | Itgae      | LRRG00125                                                                                                      | 8.87E-01 | NS | 8.76E-03 | -1.2 | 6.96E-01 | NS   |
| A_44_P269357  | NM_001047935 | 498836 | LOC498836  | cullin 5                                                                                                       | 7.25E-01 | NS | 4.38E-02 | -1.2 | 6.00E-01 | NS   |
| A_44_P525878  | NM_022683    | 64624  | Cul5       | CD93 molecule                                                                                                  | 8.86E-01 | NS | 2.66E-02 | -1.2 | 8.91E-01 | NS   |
| A_43_P12791   | NM_053383    | 84398  | Cd93       | laminin, gamma 1                                                                                               | 1.76E-01 | NS | 9.54E-03 | -1.2 | 2.63E-01 | NS   |
| A_42_P592615  | NM_053966    | 117036 | Lamc1      | olfactory receptor 956                                                                                         | 4.54E-01 | NS | 1.90E-02 | -1.2 | 3.50E-01 | NS   |
| A_64_P087806  | NM_001001381 | 302041 | Olr956     | dual specificity phosphatase 3                                                                                 | 3.52E-01 | NS | 4.70E-02 | -1.2 | 4.38E-01 | NS   |
| A_44_P218284  | NM_001173376 | 498003 | Dusp3      | glutathione peroxidase 7                                                                                       | 1.91E-01 | NS | 4.17E-02 | -1.2 | 3.59E-01 | NS   |
| A_64_P008259  | XM_001055864 |        |            |                                                                                                                | 4.76E-01 | NS | 1.79E-02 | -1.2 | 6.70E-01 | NS   |
| A_64_P100250  | NM_001106673 | 298376 | Gpx7       |                                                                                                                | 4.34E-01 | NS | 1.92E-02 | -1.2 | 6.51E-01 | NS   |

|               |              |        |            |                                                                                              |          |    |          |      |          |      |
|---------------|--------------|--------|------------|----------------------------------------------------------------------------------------------|----------|----|----------|------|----------|------|
| A_64_P038375  | XM_001069479 |        |            | acyl-CoA synthetase short-chain family member 1                                              | 9.30E-01 | NS | 4.84E-02 | -1.2 | 2.75E-01 | NS   |
| A_64_P122790  | NM_001106524 | 296259 | Acss1      |                                                                                              | 7.06E-01 | NS | 4.66E-02 | -1.2 | 3.39E-01 | NS   |
| A_44_P349553  | XM_001079629 | 294337 | Col6a1     | collagen, type VI, alpha 1 glycoprotein 2 (zymogen granule membrane)                         | 4.89E-01 | NS | 4.51E-02 | -1.2 | 6.49E-01 | NS   |
| A_44_P425150  | NM_134418    | 171459 | Gp2        |                                                                                              | 3.12E-01 | NS | 3.21E-02 | -1.2 | 1.95E-01 | NS   |
| A_43_P19799   | NM_001108585 | 362175 | RGD1563222 | similar to RIKEN cDNA A930018P22 guanine nucleotide binding protein (G protein), gamma 11    | 2.28E-01 | NS | 2.95E-02 | -1.2 | 6.12E-01 | NS   |
| A_44_P562092  | NM_022396    | 64199  | Gng11      |                                                                                              | 1.15E-01 | NS | 5.68E-03 | -1.2 | 9.92E-01 | NS   |
| A_43_P10102   | NM_001106150 | 291610 | Spry4      | sprouty homolog 4 (Drosophila) calcium channel, voltage-dependent, T type, alpha 1G subunit  | 1.45E-01 | NS | 1.10E-02 | -1.2 | 2.15E-02 | -1.4 |
| A_64_P004584  | NM_031601    | 29717  | Cacna1g    | CDC42 effector protein (Rho GTPase binding) 2                                                | 1.40E-01 | NS | 3.48E-02 | -1.2 | 4.23E-01 | NS   |
| A_44_P1019480 | NM_001009689 | 309175 | Cdc42ep2   |                                                                                              | 8.15E-02 | NS | 4.58E-02 | -1.2 | 8.19E-01 | NS   |
| A_64_P064938  | NM_001109332 | 502097 | Dkk4       | dickkopf homolog 4 (Xenopus laevis)                                                          | 6.16E-01 | NS | 3.24E-02 | -1.2 | 2.19E-01 | NS   |
| A_44_P311484  | NM_019329    | 54279  | Cntn3      | contactin 3 (plasmacytoma associated)                                                        | 8.37E-01 | NS | 4.86E-02 | -1.2 | 2.27E-01 | NS   |
| A_43_P17235   | FQ221747     |        |            |                                                                                              | 9.14E-01 | NS | 3.25E-02 | -1.2 | 2.68E-01 | NS   |
| A_64_P145837  | NM_198131    | 338457 | Tlr9       | toll-like receptor 9                                                                         | 7.81E-01 | NS | 4.18E-02 | -1.2 | 1.80E-01 | NS   |
| A_44_P620106  | NM_053802    | 116487 | Tgfb1      | transforming growth factor, beta induced                                                     | 3.60E-01 | NS | 4.66E-02 | -1.2 | 2.21E-02 | 1.5  |
| A_43_P10907   | FM113376     | 362323 | Acn9       | ACN9 homolog (S. cerevisiae)                                                                 | 7.13E-01 | NS | 1.32E-02 | -1.2 | 6.22E-01 | NS   |
| A_64_P054137  | NM_001024243 | 294292 | Nudt3      | nudix (nucleoside diphosphate linked moiety X)-type motif 3                                  | 5.71E-01 | NS | 3.54E-02 | -1.2 | 1.47E-01 | NS   |
| A_64_P163511  | NM_013190    | 25741  | Pfkf       | phosphofructokinase, liver                                                                   | 2.21E-01 | NS | 3.90E-02 | -1.2 | 1.35E-01 | NS   |
| A_64_P135758  | XM_001059223 | 363472 | Prrg1      | proline rich Gla (G-carboxyglutamic acid) 1 heat shock protein, alpha-crystallin-related, B9 | 2.04E-01 | NS | 1.63E-02 | -1.2 | 3.31E-01 | NS   |
| A_64_P041797  | NM_001108835 | 363681 | Hspb9      |                                                                                              | 8.44E-01 | NS | 3.91E-02 | -1.2 | 4.95E-01 | NS   |
| A_64_P127838  | XM_219621    |        |            |                                                                                              | 7.14E-01 | NS | 3.59E-02 | -1.2 | 3.41E-01 | NS   |
| A_44_P612186  | NM_001107344 | 306825 | Myliip     | myosin regulatory light chain interacting protein                                            | 7.24E-01 | NS | 3.83E-02 | -1.2 | 9.97E-03 | -1.6 |
| A_44_P1002996 | NM_001013900 | 293494 | Ino80e     | INO80 complex subunit E                                                                      | 1.92E-01 | NS | 4.47E-02 | -1.2 | 8.66E-01 | NS   |
| A_64_P093184  | XM_001066530 | 298069 | Col15a1    | collagen, type XV, alpha 1                                                                   | 6.42E-01 | NS | 2.39E-02 | -1.2 | 5.27E-01 | NS   |
| A_44_P1000391 | NM_001106140 | 291555 | Atp8b1     | ATPase, Class I, type 8B, member 1                                                           | 4.11E-01 | NS | 4.40E-02 | -1.2 | 1.14E-02 | -1.8 |
| A_64_P090548  | NM_001024275 | 362423 | Rassf4     | Ras association (RalGDS/AF-6) domain family member 4                                         | 9.42E-01 | NS | 1.65E-02 | -1.2 | 8.18E-01 | NS   |
| A_44_P243279  | NM_001134780 | 362973 | Parvb      | parvin, beta                                                                                 | 2.89E-01 | NS | 1.77E-02 | -1.2 | 6.80E-01 | NS   |
| A_64_P126630  | XM_001067894 | 317715 | Gsc        | goosecoid homeobox                                                                           | 7.70E-01 | NS | 4.05E-02 | -1.2 | 2.49E-01 | NS   |
| A_44_P121781  | XM_343661    |        |            |                                                                                              | 5.72E-01 | NS | 3.68E-02 | -1.2 | 1.08E-01 | NS   |
| A_44_P671986  | NM_001107781 | 311450 | Pak7       | p21 protein (Cdc42/Rac)-activated kinase 7                                                   | 6.05E-01 | NS | 4.18E-02 | -1.2 | 1.16E-01 | NS   |
| A_64_P064722  | NM_001000198 | 293362 | Olr215     | olfactory receptor 215                                                                       | 9.35E-01 | NS | 2.13E-02 | -1.2 | 3.01E-01 | NS   |
| A_64_P074840  | NM_001014095 | 315952 | Dzip1l     | DAZ interacting protein 1-like eukaryotic translation initiation factor 4E member 3          | 7.55E-01 | NS | 1.85E-02 | -1.2 | 9.54E-01 | NS   |
| A_42_P526712  | NM_001106612 | 297481 | Eif4e3     |                                                                                              | 5.87E-01 | NS | 4.30E-02 | -1.2 | 4.37E-01 | NS   |
| A_64_P083034  | NM_144759    | 246281 | Asmt       | acetylserotonin O-methyltransferase                                                          | 5.80E-01 | NS | 2.85E-02 | -1.2 | 3.65E-01 | NS   |
| A_64_P025633  | NM_139107    | 245966 | Tmem150a   | transmembrane protein 150A potassium inwardly-rectifying channel, subfamily J, member 8      | 2.26E-01 | NS | 2.00E-02 | -1.2 | 2.89E-01 | NS   |
| A_43_P11820   | NM_017099    | 25472  | Kcnj8      |                                                                                              | 6.87E-01 | NS | 1.47E-02 | -1.2 | 6.48E-01 | NS   |
| A_64_P070088  | NM_017354    | 50864  | Ntm        | neurotrimin                                                                                  | 8.11E-02 | NS | 4.19E-02 | -1.2 | 1.97E-01 | NS   |
| A_42_P835787  | NM_001108328 | 360754 | Zfp358     | zinc finger protein 358                                                                      | 2.53E-01 | NS | 1.66E-02 | -1.2 | 9.90E-02 | NS   |
| A_44_P1011918 | XM_001081550 | 287750 | Prp2l1     | proline rich protein 2-like 1                                                                | 2.33E-01 | NS | 3.84E-02 | -1.2 | 3.10E-01 | NS   |
| A_43_P15297   | NM_023974    | 66030  | Synpr      | synaptopodin                                                                                 | 3.13E-01 | NS | 4.19E-02 | -1.2 | 1.22E-01 | NS   |
| A_44_P422696  | NM_031541    | 25073  | Scarb1     | scavenger receptor class B, member 1 family with sequence similarity 53, member B            | 3.58E-01 | NS | 1.16E-02 | -1.2 | 1.37E-01 | NS   |
| A_42_P837441  | NM_001107556 | 309060 | Fam53b     |                                                                                              | 6.60E-01 | NS | 4.63E-02 | -1.2 | 4.33E-01 | NS   |
| A_64_P075008  | XM_001058257 | 296468 | Birc7      | baculoviral IAP repeat-containing 7                                                          | 1.46E-01 | NS | 3.90E-02 | -1.2 | 9.94E-01 | NS   |
| A_42_P668682  | NM_053883    | 116663 | Dusp6      | dual specificity phosphatase 6                                                               | 4.39E-01 | NS | 4.65E-02 | -1.2 | 3.88E-01 | NS   |
| A_64_P067481  | XM_578989    | 503441 | Mageb4     | melanoma antigen family B, 4                                                                 | 6.24E-01 | NS | 3.24E-02 | -1.2 | 5.01E-01 | NS   |
| A_64_P130883  | NM_001109184 | 499618 | LOC499618  | hypothetical LOC499618                                                                       | 5.18E-01 | NS | 4.78E-02 | -1.2 | 4.09E-01 | NS   |
| A_64_P011929  | NM_001025766 | 498951 | Il34       | interleukin 34                                                                               | 2.34E-01 | NS | 2.80E-02 | -1.2 | 6.31E-01 | NS   |

|               |              |        |            |                                                                                      |          |    |          |      |          |      |
|---------------|--------------|--------|------------|--------------------------------------------------------------------------------------|----------|----|----------|------|----------|------|
| A_44_P130380  | NM_001000806 | 405092 | Olr1250    | olfactory receptor 1250<br>similar to kinesin-like motor protein                     | 9.62E-01 | NS | 4.56E-02 | -1.2 | 3.15E-01 | NS   |
| A_44_P1016988 | XM_001080099 | 691920 | LOC691920  | C20orf23                                                                             | 6.89E-01 | NS | 4.32E-02 | -1.2 | 9.53E-01 | NS   |
| A_64_P139168  | NM_001108632 | 362383 | Rpia       | ribose 5-phosphate isomerase A                                                       | 3.35E-01 | NS | 4.65E-02 | -1.2 | 1.56E-01 | NS   |
| A_64_P102220  | NM_173130    | 286914 | Vom2r27    | vomerolnasal 2 receptor, 27<br>diffuse panbronchiolitis critical region 1<br>(human) | 9.68E-01 | NS | 4.54E-02 | -1.2 | 3.23E-01 | NS   |
| A_44_P414379  | NM_001003965 | 406199 | Dpccr1     | mex-3 homolog D (C. elegans)                                                         | 4.15E-01 | NS | 4.30E-02 | -1.2 | 4.26E-01 | NS   |
| A_44_P1014018 | XM_234921    | 299613 | Mex3d      | ubiquitin specific peptidase 15                                                      | 5.21E-01 | NS | 2.30E-02 | -1.2 | 6.73E-01 | NS   |
| A_64_P189275  | NM_145184    | 171329 | Usp15      | LIM and calponin homology domains 1                                                  | 3.65E-01 | NS | 1.53E-02 | -1.2 | 9.52E-01 | NS   |
| A_64_P075063  | XM_001077838 | 305332 | Limch1     | hypothetical protein LOC680119                                                       | 5.63E-02 | NS | 4.33E-02 | -1.2 | 5.70E-02 | NS   |
| A_64_P036034  | XM_001055803 | 680119 | LOC680119  | phosphoinositide-3-kinase interacting<br>protein 1                                   | 9.32E-01 | NS | 3.28E-02 | -1.2 | 7.16E-01 | NS   |
| A_64_P019280  | NM_001017453 | 305472 | Pik3ip1    | optic atrophy 3 (human)                                                              | 4.35E-01 | NS | 2.15E-02 | -1.2 | 7.85E-01 | NS   |
| A_42_P763553  | NM_001107486 | 308409 | Opa3       | similar to IQ motif and Sec7 domain 1                                                | 9.08E-02 | NS | 2.62E-02 | -1.2 | 7.43E-01 | NS   |
| A_44_P488475  | XM_001073009 | 686590 | LOC686590  | clathrin, light chain (Lcb)                                                          | 6.45E-01 | NS | 4.63E-02 | -1.2 | 9.18E-01 | NS   |
| A_64_P089155  | NM_053835    | 116561 | Cltb       | polo-like kinase 5                                                                   | 3.58E-01 | NS | 4.08E-02 | -1.2 | 4.40E-02 | 1.3  |
| A_64_P129088  | NM_001170557 | 314627 | Plk5       | Rho guanine nucleotide exchange factor<br>(GEF) 15                                   | 9.97E-02 | NS | 4.23E-02 | -1.2 | 9.84E-01 | NS   |
| A_64_P021398  | NM_001105789 | 287418 | Arhgef15   | ras homolog gene family, member J                                                    | 2.29E-01 | NS | 4.45E-02 | -1.2 | 1.35E-01 | NS   |
| A_64_P083120  | NM_001008320 | 299145 | Rhoj       | THAP domain containing, apoptosis<br>associated protein 3                            | 2.28E-01 | NS | 2.56E-02 | -1.2 | 4.32E-01 | NS   |
| A_64_P049972  | NM_001108695 | 362667 | Thap3      | dachsous 1 (Drosophila)                                                              | 9.00E-01 | NS | 4.50E-02 | -1.2 | 8.87E-01 | NS   |
| A_42_P542744  | NM_001107544 | 308912 | Dchs1      | similar to Complement C5 precursor                                                   | 1.58E-01 | NS | 2.07E-02 | -1.2 | 9.26E-01 | NS   |
| A_42_P670493  | XM_001080252 | 362120 | RGD1308742 | ubiquitin-conjugating enzyme E2O                                                     | 9.62E-01 | NS | 4.82E-02 | -1.2 | 2.02E-01 | NS   |
| A_64_P027027  | XM_345111    |        |            | selenoprotein P, plasma, 1                                                           | 3.01E-01 | NS | 3.70E-02 | -1.2 | 8.07E-01 | NS   |
| A_42_P607183  | XM_001081723 | 303689 | Ube2o      | suppressor of cytokine signaling 3                                                   | 3.00E-01 | NS | 1.17E-02 | -1.2 | 9.29E-01 | NS   |
| A_64_P057020  | NM_001083911 | 29360  | Sepp1      | zinc finger protein 689                                                              | 7.74E-01 | NS | 1.04E-02 | -1.2 | 9.89E-01 | NS   |
| A_64_P125883  | NM_053565    | 89829  | Socs3      | tetraspanin 2                                                                        | 5.65E-01 | NS | 3.12E-02 | -1.2 | 9.92E-02 | NS   |
| A_42_P792728  | NM_173330    | 286996 | Znf689     | WD and tetratricopeptide repeats 1                                                   | 2.71E-01 | NS | 3.84E-02 | -1.2 | 8.28E-01 | NS   |
| A_64_P005243  | NM_022589    | 64521  | Tspan2     | RGD1562339                                                                           | 7.02E-01 | NS | 2.75E-02 | -1.2 | 1.69E-01 | NS   |
| A_42_P823706  | NM_001107908 | 313020 | Wdtdc1     | catenin, beta-interacting protein 1                                                  | 1.94E-01 | NS | 2.13E-02 | -1.2 | 8.75E-01 | NS   |
| A_64_P027095  | XM_001058431 | 498107 | RGD1562339 | transducin (beta)-like 1 X-linked receptor 1                                         | 9.99E-02 | NS | 3.42E-02 | -1.2 | 7.66E-01 | NS   |
| A_44_P512295  | NM_001173388 | 503000 | Ctnnbip1   | MTERF domain containing 3                                                            | 3.62E-01 | NS | 1.54E-02 | -1.2 | 6.17E-01 | NS   |
| A_44_P119215  | NM_001108941 | 365755 | Tbl1xr1    | cysteine and histidine-rich domain<br>(CHORD)-containing 1                           | 6.38E-01 | NS | 4.15E-02 | -1.2 | 2.13E-01 | NS   |
| A_44_P456172  | NM_001014265 | 366856 | Mterfd3    | mitochondrial ribosomal protein L19                                                  | 7.67E-01 | NS | 2.48E-02 | -1.2 | 2.34E-01 | NS   |
| A_44_P941132  | NM_001108128 | 315447 | Chordc1    | pre-B-cell leukemia homeobox 1                                                       | 3.14E-01 | NS | 4.28E-02 | -1.2 | 2.99E-01 | NS   |
| A_43_P11259   | NM_001029898 | 297372 | Mrpl19     | t-complex 1                                                                          | 4.12E-01 | NS | 3.89E-02 | -1.2 | 7.44E-01 | NS   |
| A_64_P009838  | NM_001100681 | 304947 | Pbx1       | procollagen-lysine 1, 2-oxoglutarate 5-<br>dioxygenase 1                             | 4.42E-01 | NS | 3.59E-02 | -1.2 | 3.39E-01 | NS   |
| A_64_P035058  | NM_012670    | 24818  | Tcp1       | neurexophilin 3                                                                      | 3.13E-01 | NS | 4.81E-02 | -1.2 | 7.41E-01 | NS   |
| A_44_P306355  | NM_053827    | 116552 | Plod1      | ring finger protein 10                                                               | 5.57E-01 | NS | 3.19E-02 | -1.2 | 3.57E-01 | NS   |
| A_64_P070448  | BC101856     | 59315  | Nxph3      | family with sequence similarity 188,<br>member B                                     | 6.64E-01 | NS | 3.84E-02 | -1.2 | 3.02E-01 | NS   |
| A_44_P1047375 | NM_001011904 | 288710 | Rnf10      | olfactory receptor 325                                                               | 7.92E-01 | NS | 1.29E-02 | -1.2 | 7.09E-01 | NS   |
| A_64_P097083  | XM_002727722 |        |            | HCCA2 protein                                                                        | 5.02E-01 | NS |          | -1.2 | 2.09E-01 | NS   |
| A_64_P001122  | NM_001015036 | 407765 | Siat7F     | son of sevenless homolog 2 (Drosophila)                                              | 8.60E-01 | NS | 2.72E-02 | -1.2 | 7.13E-01 | NS   |
| A_64_P029213  | NM_012578    | 24437  | H1f0       | LIM domain binding 2                                                                 | 4.21E-01 | NS | 2.08E-02 | -1.2 | 6.59E-01 | NS   |
| A_44_P180731  | NM_001130501 | 314930 | Zfpm2      | monoacylglycerol O-acyltransferase 1                                                 | 6.21E-01 | NS | 4.43E-02 | -1.2 | 8.36E-01 | NS   |
| A_64_P044476  | NM_001024865 | 287962 | Mrpl40     | purinergic receptor P2Y, G-protein coupled,<br>12                                    | 7.75E-01 | NS | 4.76E-02 | -1.2 | 4.08E-01 | NS   |
| A_44_P314270  | XM_001058587 | 312365 | Fam188b    | membrane magnesium transporter 2                                                     | 6.01E-01 | NS | 4.33E-02 | -1.2 | 5.46E-01 | NS   |
| A_64_P008477  | NM_001000247 | 293763 | Olr325     | placenta-specific 9                                                                  | 4.67E-01 | NS | 4.43E-02 | -1.2 | 2.53E-02 | -1.4 |
| A_42_P830152  | NM_001109159 | 499288 | Hcca2      |                                                                                      | 8.46E-01 | NS | 2.33E-02 | -1.2 | 2.19E-01 | NS   |
| A_64_P142430  | NM_001135561 | 85384  | Sos2       |                                                                                      | 6.11E-01 | NS | 2.27E-02 | -1.2 | 3.42E-01 | NS   |
| A_64_P099134  | NM_001106009 | 289664 | Ldb2       |                                                                                      | 7.31E-01 | NS | 1.28E-02 | -1.2 | 4.77E-01 | NS   |
| A_44_P1018098 | NM_001108803 | 363261 | Mogat1     |                                                                                      | 9.06E-01 | NS | 1.77E-02 | -1.2 | 9.52E-01 | NS   |
| A_43_P12315   | NM_022800    | 64803  | P2ry12     |                                                                                      | 4.39E-01 | NS | 4.16E-02 | -1.2 | 7.25E-01 | NS   |
| A_64_P136845  | NM_001013967 | 303211 | Mmgt2      |                                                                                      | 2.90E-01 | NS | 2.50E-02 | -1.2 | 4.44E-01 | NS   |
| A_64_P122190  | NM_001108395 | 361105 | Plac9      |                                                                                      | 1.31E-01 | NS | 1.10E-02 | -1.2 | 5.89E-01 | NS   |

|               |              |        |            |                                                                                                                                                                   |          |    |          |      |          |      |
|---------------|--------------|--------|------------|-------------------------------------------------------------------------------------------------------------------------------------------------------------------|----------|----|----------|------|----------|------|
| A_42_P618185  | NM_001108486 | 361588 | Lrrc28     | leucine rich repeat containing 28                                                                                                                                 | 5.22E-01 | NS | 4.47E-02 | -1.2 | 8.06E-02 | NS   |
| A_43_P14157   | NM_012570    | 24399  | Glud1      | glutamate dehydrogenase 1                                                                                                                                         | 9.66E-01 | NS | 3.33E-02 | -1.1 | 1.13E-01 | NS   |
| A_64_P059495  | NM_001109986 | 29467  | Ddit3      | DNA-damage inducible transcript 3                                                                                                                                 | 7.64E-01 | NS | 4.70E-02 | -1.1 | 7.94E-02 | NS   |
| A_44_P289132  | NM_001106849 | 300950 | Spsb4      | spiA/ryanodine receptor domain and SOCS box containing 4                                                                                                          | 1.03E-01 | NS | 3.73E-02 | -1.1 | 2.08E-01 | NS   |
| A_64_P084831  | NM_001033683 | 287721 | Vat1       | vesicle amine transport protein 1 homolog (T californica)                                                                                                         | 5.12E-01 | NS | 1.53E-02 | -1.1 | 6.65E-01 | NS   |
| A_44_P1000232 | NM_001106688 | 298544 | Sh3bgrl3   | SH3 domain binding glutamic acid-rich protein-like 3                                                                                                              | 6.31E-01 | NS | 3.56E-02 | -1.1 | 5.25E-01 | NS   |
| A_42_P468805  | NM_145721    | 252827 | Cdk5rap1   | CDK5 regulatory subunit associated protein 1                                                                                                                      | 4.87E-01 | NS | 2.84E-02 | -1.1 | 4.24E-01 | NS   |
| A_43_P15205   | NM_001109302 | 501099 | Srf        | serum response factor (c-fos serum response element-binding transcription factor)                                                                                 | 7.10E-01 | NS | 1.95E-02 | -1.1 | 1.97E-01 | NS   |
| A_44_P517650  | NM_020306    | 57027  | Adam17     | ADAM metallopeptidase domain 17                                                                                                                                   | 3.47E-01 | NS | 4.55E-02 | -1.1 | 2.36E-01 | NS   |
| A_43_P12815   | NM_053475    | 85237  | Ptp4a2     | protein tyrosine phosphatase 4a2                                                                                                                                  | 1.84E-01 | NS | 4.79E-02 | -1.1 | 8.04E-01 | NS   |
| A_64_P064284  | XM_001066439 | 686076 | LOC686076  | similar to suppressor of initiator codon mutations, related sequence 1                                                                                            | 3.79E-01 | NS | 4.04E-02 | -1.1 | 6.65E-01 | NS   |
| A_64_P087758  | NM_001007014 | 474154 | Rbm4b      | RNA binding motif protein 4B                                                                                                                                      | 1.76E-01 | NS | 3.87E-02 | -1.1 | 3.30E-01 | NS   |
| A_64_P066276  | NM_013160    | 25701  | Mxi1       | MAX interactor 1                                                                                                                                                  | 8.33E-01 | NS | 3.27E-02 | -1.1 | 8.39E-01 | NS   |
| A_64_P038758  | BF393110     |        |            |                                                                                                                                                                   | 9.02E-01 | NS | 3.50E-02 | -1.1 | 7.66E-01 | NS   |
| A_42_P584179  | NM_001024360 | 501101 | nod3l      | NOD3-like protein                                                                                                                                                 | 9.61E-01 | NS |          | -1.1 | 5.08E-01 | NS   |
| A_42_P522899  | NM_021578    | 59086  | Tgfb1      | transforming growth factor, beta 1                                                                                                                                | 7.03E-01 | NS | 4.58E-02 | -1.1 | 7.77E-02 | NS   |
| A_64_P121262  | NM_001009704 | 361442 | Sipa1l2    | signal-induced proliferation-associated 1 like 2                                                                                                                  | 1.45E-01 | NS |          | -1.0 | 7.03E-01 | NS   |
| A_64_P129453  | NM_001134840 | 291841 | Cnot1      | CCR4-NOT transcription complex, subunit 1                                                                                                                         | 2.24E-01 | NS |          | -1.0 | 8.09E-01 | NS   |
| A_64_P028067  | XM_225502    |        |            |                                                                                                                                                                   | 2.58E-01 | NS |          | -1.0 | 8.94E-01 | NS   |
| A_64_P104669  | XM_223048    |        |            |                                                                                                                                                                   | 2.29E-01 | NS |          | 1.0  | 7.49E-01 | NS   |
| A_64_P000398  | XM_001069779 | 299963 | RGD1564515 | similar to alpha 1B-glycoprotein                                                                                                                                  | 9.28E-01 | NS |          | 1.1  | 1.81E-01 | NS   |
| A_64_P148673  | XR_008119    |        |            |                                                                                                                                                                   | 7.44E-02 | NS |          | 1.1  | 2.10E-01 | NS   |
| A_64_P007317  | XM_001075288 | 684755 | LOC684755  | similar to zinc finger like protein 1                                                                                                                             | 1.92E-01 | NS |          | 1.1  | 6.73E-02 | NS   |
| A_42_P590577  | NM_020075    | 56783  | Eif5       | eukaryotic translation initiation factor 5                                                                                                                        | 1.75E-01 | NS | 4.64E-02 | 1.1  | 5.53E-01 | NS   |
| A_44_P588645  | FQ230244     |        |            |                                                                                                                                                                   | 6.54E-01 | NS | 4.66E-02 | 1.1  | 1.12E-01 | NS   |
| A_44_P204789  | NM_001025684 | 310682 | Pex11b     | peroxisomal biogenesis factor 11 beta                                                                                                                             | 6.20E-01 | NS | 4.49E-02 | 1.1  | 9.44E-01 | NS   |
| A_43_P12007   | NM_019283    | 50567  | Slc3a2     | solute carrier family 3 (activators of dibasic and neutral amino acid transport), member 2                                                                        | 1.01E-01 | NS | 4.98E-02 | 1.1  | 4.09E-01 | NS   |
| A_64_P033377  | XM_344425    |        |            |                                                                                                                                                                   | 9.32E-02 | NS | 4.61E-02 | 1.1  | 2.78E-01 | NS   |
| A_64_P264316  | NM_001126282 | 315329 | Mfsd5      | major facilitator superfamily domain containing 5                                                                                                                 | 2.77E-01 | NS | 3.84E-02 | 1.1  | 7.78E-01 | NS   |
| A_64_P121206  | NM_001106221 | 292554 | Aurkc      | aurora kinase C                                                                                                                                                   | 3.53E-01 | NS | 4.59E-02 | 1.1  | 1.50E-01 | NS   |
| A_44_P123631  | NM_001106130 | 291411 | Atp9b      | ATPase, class II, type 9B                                                                                                                                         | 1.55E-01 | NS | 3.51E-02 | 1.1  | 2.54E-01 | NS   |
| A_64_P048852  | XR_007887    |        |            |                                                                                                                                                                   | 1.83E-01 | NS |          | 1.1  | 8.55E-01 | NS   |
| A_42_P634910  | NM_017355    | 50866  | Rab4b      | RAB4B, member RAS oncogene family                                                                                                                                 | 2.68E-01 | NS | 4.04E-02 | 1.1  | 3.58E-01 | NS   |
| A_64_P118296  | NM_001025409 | 297893 | Hdac1      | histone deacetylase 1                                                                                                                                             | 1.13E-01 | NS | 3.35E-02 | 1.1  | 8.13E-01 | NS   |
| A_42_P537516  | NM_001106023 | 289874 | Erlec1     | endoplasmic reticulum lectin 1                                                                                                                                    | 2.68E-01 | NS | 4.15E-02 | 1.1  | 5.30E-02 | NS   |
| A_64_P063324  | NM_001107143 | 304512 | Rbm19      | RNA binding motif protein 19                                                                                                                                      | 1.26E-01 | NS | 2.45E-02 | 1.1  | 6.93E-01 | NS   |
| A_64_P011744  | NM_001108789 | 363194 | Xpo5       | exportin 5                                                                                                                                                        | 3.06E-01 | NS | 2.28E-02 | 1.1  | 5.75E-01 | NS   |
| A_64_P089425  | NM_001107143 | 304512 | Rbm19      | RNA binding motif protein 19                                                                                                                                      | 8.96E-01 | NS | 2.91E-02 | 1.1  | 2.32E-01 | NS   |
| A_64_P094930  | NM_001108463 | 361476 | Rshl2      | radial spokehead-like 2                                                                                                                                           | 1.56E-01 | NS | 4.33E-02 | 1.1  | 2.29E-01 | NS   |
| A_44_P558390  | NM_001115039 | 683402 | LOC683402  | similar to AP-3 complex subunit sigma-2 (Adapter-related protein complex 3 sigma-2 subunit) (Sigma-adaptin 3b) (AP-3 complex sigma-3B subunit) (Sigma-3B-adaptin) | 9.60E-01 | NS | 5.00E-02 | 1.1  | 4.72E-01 | NS   |
| A_64_P012444  | NM_001107599 | 309441 | Peo1       | progressive external ophthalmoplegia 1                                                                                                                            | 5.35E-02 | NS | 3.57E-02 | 1.1  | 1.28E-01 | NS   |
| A_44_P311945  | NM_001106677 | 298425 | RGD1310351 | similar to RIKEN cDNA 4732418C07                                                                                                                                  | 7.98E-02 | NS | 4.55E-02 | 1.1  | 4.53E-02 | -1.3 |
| A_42_P573766  | NM_001100894 | 314453 | Wdr20a     | WD repeat domain 20a                                                                                                                                              | 2.83E-01 | NS | 3.65E-02 | 1.1  | 6.27E-01 | NS   |

|               |              |        |            |                                                                                           |          |    |          |     |          |      |
|---------------|--------------|--------|------------|-------------------------------------------------------------------------------------------|----------|----|----------|-----|----------|------|
| A_64_P096836  | NM_001004199 | 246244 | Tax1bp1    | Tax1 (human T-cell leukemia virus type I) binding protein 1                               | 9.86E-02 | NS | 2.41E-02 | 1.1 | 2.88E-01 | NS   |
| A_64_P048133  | NM_175603    | 319110 | Hnrnpr     | heterogeneous nuclear ribonucleoprotein R                                                 | 1.14E-01 | NS | 4.71E-02 | 1.1 | 3.80E-01 | NS   |
| A_44_P457226  | NM_001106187 | 292019 | Sf3b3      | splicing factor 3b, subunit 3                                                             | 5.60E-01 | NS | 2.74E-02 | 1.1 | 8.08E-02 | NS   |
| A_44_P189660  | NM_001024775 | 308362 | Zfp110     | zinc finger protein 110                                                                   | 8.88E-01 | NS | 1.91E-02 | 1.1 | 1.91E-01 | NS   |
| A_64_P057516  | NM_001106697 | 298586 | Mrto4      | mRNA turnover 4 homolog (S. cerevisiae)                                                   | 2.71E-01 | NS | 4.13E-02 | 1.1 | 6.36E-01 | NS   |
| A_42_P513939  | NM_001126286 | 317344 | RGD1565685 | similar to RIKEN cDNA 1810030O07                                                          | 1.07E-01 | NS | 3.96E-02 | 1.1 | 4.09E-01 | NS   |
| A_44_P1030897 | NM_207589    | 290549 | Selk       | selenoprotein K                                                                           | 6.43E-02 | NS | 4.67E-02 | 1.1 | 3.31E-01 | NS   |
| A_44_P717706  | NM_001007682 | 305889 | Thtpa      | thiamine triphosphatase                                                                   | 5.77E-01 | NS | 3.81E-02 | 1.1 | 7.96E-01 | NS   |
| A_64_P032991  | XR_008004    |        |            | tyrosine 3-monooxygenase/tryptophan 5-monooxygenase activation protein, theta polypeptide | 1.65E-01 | NS | 4.88E-02 | 1.1 | 1.91E-02 | -1.6 |
| A_44_P1036408 | NM_013053    | 25577  | Ywhaq      | tyrosine 3-monooxygenase/tryptophan 5-monooxygenase activation protein, theta polypeptide | 1.09E-01 | NS | 4.99E-02 | 1.1 | 1.46E-01 | NS   |
| A_44_P221287  | XM_001067280 | 313478 | Cc2d1b     | coiled-coil and C2 domain containing 1B                                                   | 9.14E-01 | NS | 4.78E-02 | 1.1 | 4.86E-01 | NS   |
| A_64_P085700  | NM_001108548 | 361923 | Rpl22l1    | ribosomal protein L22 like 1                                                              | 3.34E-01 | NS | 4.99E-02 | 1.1 | 3.50E-01 | NS   |
| A_64_P077361  | NM_001107360 | 307067 | Dip2c      | DIP2 disco-interacting protein 2 homolog C (Drosophila)                                   | 9.99E-01 | NS | 3.62E-02 | 1.1 | 8.77E-01 | NS   |
| A_64_P069131  | NM_001012098 | 312824 | Recql      | RecQ protein-like (DNA helicase Q1-like)                                                  | 2.42E-01 | NS | 4.50E-02 | 1.1 | 1.58E-01 | NS   |
| A_44_P265399  | NM_001108220 | 316412 | Als2cr4    | amyotrophic lateral sclerosis 2 (juvenile) chromosome region, candidate 4                 | 3.41E-01 | NS | 3.11E-02 | 1.1 | 2.07E-01 | NS   |
| A_44_P1022237 | NM_133580    | 171111 | Rab26      | RAB26, member RAS oncogene family adaptor-related protein complex 1, beta 1 subunit       | 7.04E-02 | NS | 2.15E-02 | 1.1 | 2.51E-01 | NS   |
| A_64_P040980  | NM_017277    | 29663  | Ap1b1      | dihydrouridine synthase 3-like (S. cerevisiae)                                            | 3.78E-01 | NS | 4.72E-02 | 1.1 | 2.76E-01 | NS   |
| A_44_P539156  | NM_001034923 | 301122 | Dus3l      | dihydrouridine synthase 3-like (S. cerevisiae)                                            | 1.20E-01 | NS | 3.46E-02 | 1.1 | 2.44E-01 | NS   |
| A_64_P081962  | NM_001113783 | 362460 | Golt1b     | golgi transport 1 homolog B (S. cerevisiae)                                               | 1.06E-01 | NS | 4.70E-02 | 1.1 | 1.56E-01 | NS   |
| A_64_P117180  | NM_001106210 | 292306 | Rnaset2    | ribonuclease T2                                                                           | 6.69E-02 | NS | 2.58E-02 | 1.1 | NS       | NS   |
| A_44_P623083  | NM_001009292 | 293489 | Giyd2      | GIY-YIG domain containing 2                                                               | 6.79E-01 | NS | 3.57E-02 | 1.1 | 5.74E-01 | NS   |
| A_44_P525151  | NM_001107576 | 309200 | Ints5      | integrator complex subunit 5                                                              | 2.27E-01 | NS | 2.49E-02 | 1.1 | 1.32E-02 | 1.9  |
| A_64_P105298  | XM_002725785 |        |            | integrator complex subunit 5                                                              | 1.92E-01 | NS | 2.11E-02 | 1.1 | 3.79E-01 | NS   |
| A_64_P132881  | FQ221634     | 29284  | Rps14      | ribosomal protein S14                                                                     | 1.52E-01 | NS | 4.71E-02 | 1.1 | 1.32E-01 | NS   |
| A_64_P053680  | NM_001108089 | 314798 | RGD1310270 | similar to CG33154-PB                                                                     | 2.57E-01 | NS | 4.74E-02 | 1.1 | 5.77E-01 | NS   |
| A_44_P1030215 | NM_001006989 | 301013 | Shisa5     | shisa homolog 5 (Xenopus laevis)                                                          | 4.29E-01 | NS | 2.35E-02 | 1.1 | 4.21E-01 | NS   |
| A_64_P050358  | XM_001053512 |        |            | shisa homolog 5 (Xenopus laevis)                                                          | 1.03E-01 | NS | 3.59E-02 | 1.1 | 1.76E-01 | NS   |
| A_44_P357470  | NM_030849    | 81507  | Bmpr1a     | bone morphogenetic protein receptor, type IA                                              | 2.15E-01 | NS | 4.88E-02 | 1.1 | 4.35E-01 | NS   |
| A_43_P13317   | NM_138877    | 25035  | Cyb5r3     | cytochrome b5 reductase 3                                                                 | 2.20E-01 | NS | 3.41E-02 | 1.1 | 1.99E-01 | NS   |
| A_44_P959443  | NM_001168542 | 296293 | Cbfa2t2    | core-binding factor, runt domain, alpha subunit 2; translocated to, 2                     | 3.13E-01 | NS | 2.82E-02 | 1.1 | 3.26E-01 | NS   |
| A_44_P538691  | NM_031772    | 83581  | Polr1a     | polymerase (RNA) I polypeptide A                                                          | 5.98E-01 | NS | 4.43E-02 | 1.1 | 1.76E-01 | NS   |
| A_43_P16894   | NM_001030054 | 595134 | Akirin1    | akirin 1                                                                                  | 2.67E-01 | NS | 4.10E-02 | 1.1 | 2.45E-01 | NS   |
| A_64_P029054  | NM_021868    | 60465  | Cttn       | cortactin                                                                                 | 5.76E-01 | NS | 3.51E-02 | 1.1 | 6.59E-01 | NS   |
| A_64_P161413  | NM_001013905 | 294004 | RGD1307648 | similar to CG13901-PA                                                                     | 1.05E-01 | NS | 4.45E-02 | 1.1 | 3.31E-01 | NS   |
| A_64_P108692  | NM_001136162 | 292095 | Ttc13      | tetratricopeptide repeat domain 13                                                        | 5.44E-02 | NS | 3.01E-02 | 1.1 | 3.60E-01 | NS   |
| A_44_P213082  | NM_001031641 | 290923 | Aga        | aspartylglucosaminidase                                                                   | 1.05E-01 | NS | 4.11E-02 | 1.2 | 5.93E-01 | NS   |
| A_64_P077806  | NM_001108917 | 365314 | Lipt2      | lipoyl(octanoyl) transferase 2 (putative)                                                 | 1.19E-01 | NS | 3.26E-02 | 1.2 | 5.08E-01 | NS   |
| A_64_P154249  | NM_001011995 | 300218 | Tuba1c     | tubulin, alpha 1C                                                                         | 5.52E-02 | NS | 3.85E-02 | 1.2 | 2.39E-01 | NS   |
| A_44_P132039  | NM_001014208 | 363027 | Yip2       | Yip1 domain family, member 2                                                              | 7.04E-02 | NS | 1.98E-02 | 1.2 | 1.40E-01 | NS   |
| A_64_P137436  | XM_001081745 | 688286 | LOC688286  | similar to threonine aldolase 1                                                           | 7.89E-01 | NS | 2.99E-02 | 1.2 | 7.27E-01 | NS   |
| A_44_P459279  | XM_002725694 | 308837 | Ints4      | integrator complex subunit 4                                                              | 8.47E-01 | NS | 2.88E-02 | 1.2 | 3.74E-01 | NS   |
| A_64_P097193  | XM_001072207 | 315969 | Topbp1     | topoisomerase (DNA) II binding protein 1                                                  | 9.10E-01 | NS | 3.06E-02 | 1.2 | 4.78E-02 | 1.5  |
| A_64_P008928  | NM_001004102 | 296911 | ST7        | suppression of tumorigenicity 7                                                           | 1.19E-01 | NS | 4.36E-02 | 1.2 | 6.87E-01 | NS   |
| A_64_P148762  | NM_001100493 | 287134 | Gnptg      | N-acetylglucosamine-1-phosphate transferase, gamma subunit                                | 8.74E-02 | NS | 2.02E-02 | 1.2 | 9.68E-02 | NS   |
| A_64_P219062  | CK839443     |        |            | ubiquitin-fold modifier conjugating enzyme 1                                              | 4.49E-01 | NS | 4.01E-02 | 1.2 | 5.17E-01 | NS   |
| A_44_P522293  | NM_001003709 | 445268 | Ufc1       | ubiquitin-fold modifier conjugating enzyme 1                                              | 2.32E-01 | NS | 3.34E-02 | 1.2 | 1.76E-01 | NS   |
| A_44_P449734  | XR_085947    |        |            | ubiquitin-fold modifier conjugating enzyme 1                                              | 5.54E-02 | NS | 4.58E-02 | 1.2 | 6.09E-01 | NS   |

|               |              |           |            |                                                                                                 |          |    |          |     |          |      |
|---------------|--------------|-----------|------------|-------------------------------------------------------------------------------------------------|----------|----|----------|-----|----------|------|
| A_44_P607583  | NM_001007706 | 314462    | Trmt61a    | tRNA methyltransferase 61 homolog A (S. cerevisiae)                                             | 5.58E-02 | NS | 1.98E-02 | 1.2 | 3.99E-01 | NS   |
| A_64_P154466  | NM_001107711 | 310756    | Mov10      | Moloney leukemia virus 10                                                                       | 8.70E-01 | NS | 3.50E-02 | 1.2 | 6.18E-01 | NS   |
| A_64_P128438  | NM_012591    | 24508     | Irf1       | interferon regulatory factor 1                                                                  | 3.19E-01 | NS | 4.35E-02 | 1.2 | 9.64E-02 | NS   |
| A_43_P15709   | NM_183329    | 252891    | Sra1       | steroid receptor RNA activator 1                                                                | 5.48E-02 | NS | 2.45E-02 | 1.2 | 6.00E-01 | NS   |
| A_44_P808072  | NM_001107904 | 312947    | Tgs1       | trimethylguanosine synthase homolog (S. cerevisiae)                                             | 5.67E-01 | NS | 4.06E-02 | 1.2 | 3.17E-01 | NS   |
| A_44_P426936  | NM_001108040 | 314300    | RGD1307704 | similar to RIKEN cDNA 2410016O06 conserved helix-loop-helix ubiquitous kinase                   | 5.00E-01 | NS | 3.92E-02 | 1.2 | 2.60E-01 | NS   |
| A_44_P269609  | NM_001107588 | 309361    | Chuk       | kinase                                                                                          | 7.88E-02 | NS | 3.52E-02 | 1.2 | 5.91E-02 | NS   |
| A_64_P026311  | NM_001106444 | 295243    | Krtcap2    | keratinocyte associated protein 2                                                               | 5.32E-02 | NS | 4.84E-02 | 1.2 | 2.16E-02 | -1.6 |
| A_44_P187685  | NM_001105940 | 288783    | Ormdl2     | ORM1-like 2 (S. cerevisiae)                                                                     | 1.56E-01 | NS | 3.72E-02 | 1.2 | 7.12E-02 | NS   |
| A_42_P641107  | NM_021582    | 59102     | Rpa2       | replication protein A2                                                                          | 2.47E-01 | NS | 2.81E-02 | 1.2 | 1.19E-01 | NS   |
| A_44_P318435  | NM_001004078 | 294864    | Cct5       | chaperonin containing Tcp1, subunit 5 (epsilon)                                                 | 2.42E-01 | NS | 2.52E-02 | 1.2 | 8.82E-02 | NS   |
| A_64_P122701  | NM_001107676 | 310417    | RGD1309403 | similar to hypothetical protein FLJ12661 USO1 homolog, vesicle docking protein (yeast)          | 3.41E-01 | NS | 2.40E-02 | 1.2 | 8.95E-01 | NS   |
| A_43_P15540   | NM_019379    | 56042     | Uso1       | USO1 homolog, vesicle docking protein (yeast)                                                   | 1.28E-01 | NS | 4.81E-02 | 1.2 | 2.71E-01 | NS   |
| A_44_P479631  | NM_001108256 | 317576    | Ocri       | oculocerebrorenal syndrome of Lowe v-rel reticuloendotheliosis viral oncogene homolog A (avian) | 1.40E-01 | NS | 3.99E-02 | 1.2 | 5.86E-01 | NS   |
| A_64_P046388  | NM_199267    | 309165    | Rela       | N-acylsphingosine amidohydrolase (non-lysosomal ceramidase) 2                                   | 6.57E-01 | NS | 1.38E-02 | 1.2 | 6.09E-01 | NS   |
| A_64_P102483  | NM_053646    | 114104    | Asah2      | polymerase (DNA-directed), delta interacting protein 3                                          | 5.83E-02 | NS | 4.85E-02 | 1.2 | 1.93E-01 | NS   |
| A_43_P10642   | NM_001130506 | 315170    | Poldip3    | transmembrane protein 175                                                                       | 1.80E-01 | NS | 7.68E-03 | 1.2 | 3.98E-01 | NS   |
| A_44_P501365  | NM_001013991 | 305623    | Tmem175    | THO complex 5                                                                                   | 3.75E-01 | NS | 1.60E-02 | 1.2 | 3.05E-01 | NS   |
| A_43_P23210   | NM_001012153 | 360972    | Thoc5      | WD repeat domain 8                                                                              | 8.03E-01 | NS | 1.45E-02 | 1.2 | 5.07E-01 | NS   |
| A_44_P204956  | NM_001014262 | 366515    | Wdr8       | SEC63 homolog (S. cerevisiae)                                                                   | 3.02E-01 | NS | 4.20E-02 | 1.2 | 2.18E-01 | NS   |
| A_64_P101553  | NM_001107637 | 309858    | Sec63      | ribosomal protein L36a                                                                          | 7.32E-02 | NS | 9.00E-03 | 1.2 | 5.34E-02 | NS   |
| A_64_P057533  | NM_001128065 | 292964    | Rpl36a     | similar to C11orf17 protein                                                                     | 2.53E-01 | NS | 2.87E-02 | 1.2 | 6.09E-01 | NS   |
| A_42_P797965  | NM_001108497 | 361624    | RGD1306959 | zinc finger, MYM-type 3                                                                         | 1.65E-01 | NS | 4.37E-02 | 1.2 | 7.52E-02 | NS   |
| A_44_P389462  | NM_001040155 | 317260    | Zmym3      | COMM domain containing 7                                                                        | 2.50E-01 | NS | 4.92E-02 | 1.2 | 3.67E-01 | NS   |
| A_43_P17772   | NM_001030029 | 296285    | Comm7      | component of oligomeric golgi complex 3                                                         | 1.46E-01 | NS | 3.97E-02 | 1.2 | 7.94E-01 | NS   |
| A_64_P077751  | NM_001012157 | 361073    | Cog3       | sortilin 1                                                                                      | 8.73E-01 | NS | 3.20E-02 | 1.2 | 5.85E-01 | NS   |
| A_44_P822283  | NM_031767    | 83576     | Sort1      | nucleotide binding protein 2                                                                    | 8.98E-01 | NS | 4.28E-02 | 1.2 | 7.72E-01 | NS   |
| A_44_P263060  | NM_001011891 | 287125    | Nubp2      | similar to RIKEN cDNA E230015L20 gene                                                           | 1.26E-01 | NS | 2.34E-02 | 1.2 | 9.62E-01 | NS   |
| A_64_P045544  | FQ226855     |           |            | keratin associated protein 16-5                                                                 | 1.11E-01 | NS | 4.06E-02 | 1.2 | 1.99E-01 | NS   |
| A_44_P306156  | XR_085636    | 306238    | RGD1560873 | WD repeat domain 25-like                                                                        | 1.56E-01 | NS | 4.96E-02 | 1.2 | 2.04E-01 | NS   |
| A_64_P071362  | NM_001109424 | 680703    | Krtap16-5  | TBCC domain containing 1                                                                        | 3.14E-01 | NS | 4.04E-02 | 1.2 | 5.97E-01 | NS   |
| A_64_P054856  | NM_001135894 | 314443    | Wdr25l     | adenosine deaminase, tRNA-specific 3, TAD3 homolog (S. cerevisiae)                              | 5.59E-02 | NS | 2.97E-02 | 1.2 | 7.91E-01 | NS   |
| A_64_P085467  | NM_001012016 | 303830    | Tbccd1     | ATP-binding cassette, sub-family D (ALD), member 3                                              | 4.15E-01 | NS | 2.43E-02 | 1.2 | 3.38E-01 | NS   |
| A_44_P185243  | XM_001072014 |           |            |                                                                                                 | 8.06E-01 | NS | 4.13E-02 | 1.2 | 1.54E-01 | NS   |
| A_64_P065691  | NM_001103361 | 100125374 | Adat3      | calpain 10                                                                                      | 7.47E-01 | NS | 1.52E-02 | 1.2 | 9.75E-01 | NS   |
| A_43_P11570   | NM_012804    | 25270     | Abcd3      | glutamyl-peptide cyclotransferase-like                                                          | 9.65E-02 | NS | 4.91E-02 | 1.2 | 3.09E-01 | NS   |
| A_64_P093633  | XM_001077234 |           |            | zinc finger protein 653                                                                         | 6.90E-01 | NS | 3.89E-02 | 1.2 | 1.84E-01 | NS   |
| A_43_P12631   | NM_031673    | 63834     | Capn10     | fucokinase                                                                                      | 7.44E-02 | NS | 2.42E-02 | 1.2 | 8.23E-01 | NS   |
| A_64_P009515  | NM_001106230 | 292687    | Qpctl      | hippocampus abundant gene transcript 1                                                          | 9.91E-01 | NS | 1.05E-02 | 1.2 | 8.25E-01 | NS   |
| A_44_P1022762 | NM_001106807 | 300446    | Zfp653     | exostoses (multiple) 2                                                                          | 5.13E-02 | NS | 2.81E-02 | 1.2 | 8.65E-01 | NS   |
| A_64_P335246  | NM_001107429 | 307848    | Fuk        | hypothetical protein LOC606294                                                                  | 7.01E-02 | NS | 2.15E-02 | 1.2 | 5.51E-01 | NS   |
| A_44_P575034  | NM_001106467 | 100134827 | Hiat1      | protein tyrosine phosphatase, non-receptor type 9                                               | 6.19E-01 | NS | 4.93E-02 | 1.2 | 3.07E-01 | NS   |
| A_44_P220277  | NM_001107751 | 311215    | Ext2       | PRP4 pre-mRNA processing factor 4 homolog B (yeast)                                             | 1.40E-01 | NS | 3.22E-02 | 1.2 | 3.23E-01 | NS   |
| A_44_P365947  | NM_001031627 | 606294    | LOC606294  | choline kinase alpha                                                                            | 9.04E-01 | NS | 3.65E-02 | 1.2 | 3.24E-01 | NS   |
| A_44_P244138  | NM_001013040 | 266611    | Ptpn9      |                                                                                                 | 8.80E-01 | NS | 3.17E-02 | 1.2 | 1.28E-01 | NS   |
| A_44_P1016170 | NM_001011923 | 291078    | Prpf4b     |                                                                                                 | 2.85E-01 | NS | 2.61E-02 | 1.2 | 7.43E-01 | NS   |
| A_64_P015607  | NM_017127    | 29194     | Chka       |                                                                                                 | 3.49E-01 | NS | 2.73E-02 | 1.2 | 6.18E-02 | NS   |
| A_64_P137070  | XM_002727181 |           |            |                                                                                                 | 2.66E-01 | NS | 4.35E-02 | 1.2 | 1.89E-02 | -1.3 |

|              |              |        |            |                                                                                              |          |    |          |     |          |    |
|--------------|--------------|--------|------------|----------------------------------------------------------------------------------------------|----------|----|----------|-----|----------|----|
| A_44_P144277 | NM_017175    | 29355  | Pkn1       | protein kinase N1                                                                            | 4.42E-01 | NS | 4.45E-02 | 1.2 | 8.37E-01 | NS |
| A_44_P407543 | NM_001024996 | 304346 | Mblac1     | metallo-beta-lactamase domain containing 1                                                   | 6.13E-01 | NS | 3.80E-02 | 1.2 | 8.99E-01 | NS |
| A_44_P210120 | NM_001008521 | 315265 | Twf1       | twinfilin, actin-binding protein, homolog 1 (Drosophila)                                     | 1.10E-01 | NS | 4.70E-02 | 1.2 | 6.49E-01 | NS |
| A_44_P265965 | NM_031360    | 83537  | Smpd2      | sphingomyelin phosphodiesterase 2, neutral                                                   | 3.43E-01 | NS | 3.34E-02 | 1.2 | 4.91E-01 | NS |
| A_42_P762618 | NM_053425    | 84485  | Ccs        | copper chaperone for superoxide dismutase                                                    | 9.78E-02 | NS | 2.40E-02 | 1.2 | 3.04E-01 | NS |
| A_64_P166361 | FQ228753     |        |            |                                                                                              | 6.93E-01 | NS | 1.98E-02 | 1.2 | 1.76E-01 | NS |
| A_44_P382525 | NM_001122976 | 314999 | Trmt12     | tRNA methyltransferase 12 homolog (S. cerevisiae)                                            | 6.58E-01 | NS | 2.50E-02 | 1.2 | 5.77E-01 | NS |
| A_44_P928907 | XM_001077676 | 498952 | Zfp1       | zinc finger protein 1                                                                        | 5.02E-01 | NS | 3.98E-02 | 1.2 | 5.16E-01 | NS |
| A_44_P108003 | NM_001130559 | 362899 | Nipal2     | NIPA-like domain containing 2                                                                | 6.65E-02 | NS | 2.85E-02 | 1.2 | 6.79E-01 | NS |
| A_44_P326198 | NM_001011927 | 291969 | Atp6v0d1   | ATPase, H+ transporting, lysosomal 38kDa, V0 subunit d1                                      | 3.72E-01 | NS | 1.73E-02 | 1.2 | 4.37E-01 | NS |
| A_42_P671502 | NM_053467    | 84599  | Tmed10     | transmembrane emp24-like trafficking protein 10 (yeast)                                      | 6.16E-02 | NS | 4.59E-02 | 1.2 | 6.35E-02 | NS |
| A_44_P459391 | NM_001131006 | 290555 | Spcs1      | signal peptidase complex subunit 1 homolog (S. cerevisiae)                                   | 1.09E-01 | NS | 1.90E-02 | 1.2 | 2.94E-01 | NS |
| A_44_P945846 | NM_001108707 | 362728 | Twistnb    | TWIST neighbor                                                                               | 1.37E-01 | NS | 4.95E-02 | 1.2 | 7.81E-01 | NS |
| A_64_P015983 | NM_022516    | 29497  | Ptbp1      | polypyrimidine tract binding protein 1                                                       | 5.48E-01 | NS | 4.81E-02 | 1.2 | 9.37E-01 | NS |
| A_43_P18388  | NM_001107150 | 304570 | Ddx51      | DEAD (Asp-Glu-Ala-Asp) box polypeptide 51                                                    | 4.00E-01 | NS | 2.04E-02 | 1.2 | 7.69E-01 | NS |
| A_44_P930673 | NM_001135895 | 363164 | Wdr48      | WD repeat domain 48                                                                          | 7.07E-01 | NS | 3.07E-02 | 1.2 | 8.16E-01 | NS |
| A_64_P150835 | NM_001113784 | 362594 | Meaf6      | MYST/Esal1-associated factor 6                                                               | 5.00E-02 | NS | 2.55E-02 | 1.2 | 7.06E-01 | NS |
| A_64_P148326 | XM_001063552 |        |            |                                                                                              | 1.95E-01 | NS | 4.77E-02 | 1.2 | 6.67E-01 | NS |
| A_44_P184817 | NM_080892    | 140927 | Selenbp1   | selenium binding protein 1                                                                   | 5.91E-01 | NS | 3.66E-02 | 1.2 | 5.00E-01 | NS |
| A_42_P453894 | NM_001108296 | 360617 | RGD1306682 | similar to RIKEN cDNA 1810046J19                                                             | 1.63E-01 | NS | 3.71E-02 | 1.2 | 2.48E-01 | NS |
| A_44_P401140 | NM_001012008 | 303226 | Znf18      | zinc finger protein 18                                                                       | 9.72E-01 | NS | 3.90E-02 | 1.2 | 7.15E-01 | NS |
| A_42_P514027 | NM_001079894 | 361659 | Plekha1    | pleckstrin homology domain containing, family A (phosphoinositide binding specific) member 1 | 6.59E-01 | NS | 2.44E-02 | 1.2 | 9.21E-01 | NS |
| A_44_P238392 | NM_001047883 | 309176 | Mrpl49     | mitochondrial ribosomal protein L49                                                          | 2.28E-01 | NS | 4.94E-02 | 1.2 | 1.94E-01 | NS |
| A_44_P107184 | NM_019219    | 29459  | Rbbp9      | retinoblastoma binding protein 9                                                             | 5.03E-01 | NS | 2.85E-02 | 1.2 | 7.94E-01 | NS |
| A_43_P19656  | NM_001127533 | 303100 | Mgat4b     | mannosyl (alpha-1,3-)-glycoprotein beta-1,4-N-acetylglucosaminyltransferase, isozyme B       | 1.55E-01 | NS | 3.05E-02 | 1.2 | 4.23E-01 | NS |
| A_44_P314505 | NM_001108842 | 363760 | Arl6       | ADP-ribosylation factor-like 6                                                               | 1.70E-01 | NS | 8.83E-03 | 1.2 | 2.41E-01 | NS |
| A_64_P148459 | NM_001107442 | 307927 | Taf5l      | TAF5-like RNA polymerase II, p300/CBP-associated factor (PCAF)-associated factor             | 4.07E-01 | NS | 1.27E-02 | 1.2 | 1.32E-01 | NS |
| A_64_P124309 | NM_001024969 | 288545 | RGD1305455 | similar to hypothetical protein FLJ10925                                                     | 3.60E-01 | NS | 1.49E-02 | 1.2 | 5.61E-01 | NS |
| A_64_P128160 | XM_001057307 | 306255 | Nisch      | nischarin                                                                                    | 3.91E-01 | NS | 3.35E-02 | 1.2 | 5.30E-01 | NS |
| A_44_P745585 | NM_001024309 | 499749 | LOC499749  | similar to RIKEN cDNA C430004E15                                                             | 1.64E-01 | NS | 4.85E-02 | 1.2 | 1.59E-01 | NS |
| A_64_P017304 | NM_053463    | 84595  | Nucb1      | nucleobindin 1                                                                               | 5.28E-01 | NS | 2.13E-02 | 1.2 | 9.70E-01 | NS |
| A_44_P346318 | XM_001079503 | 292082 | Tcf25      | transcription factor 25 (basic helix-loop-helix)                                             | 1.47E-01 | NS | 3.25E-02 | 1.2 | 2.79E-01 | NS |
| A_64_P079807 | NM_198734    | 292768 | Yif1b      | Yip1 interacting factor homolog B (S. cerevisiae)                                            | 9.01E-01 | NS | 2.52E-02 | 1.2 | 5.05E-01 | NS |
| A_44_P436101 | NM_001108542 | 361882 | Rgnef      | Rho-guanine nucleotide exchange factor                                                       | 1.23E-01 | NS | 3.02E-02 | 1.2 | 1.72E-01 | NS |
| A_44_P384223 | NM_024151    | 79120  | Arf4       | ADP-ribosylation factor 4                                                                    | 1.31E-01 | NS | 1.34E-02 | 1.2 | 3.49E-01 | NS |
| A_43_P16525  | NM_001108143 | 315634 | Rbm7       | RNA binding motif protein 7                                                                  | 3.88E-01 | NS | 1.54E-02 | 1.2 | 1.48E-01 | NS |
| A_44_P314353 | NM_001037765 | 288772 | Spryd4     | SPRY domain containing 4                                                                     | 3.89E-01 | NS | 3.53E-02 | 1.2 | 1.53E-01 | NS |
| A_44_P466271 | NM_001012066 | 308589 | Sphk2      | sphingosine kinase 2                                                                         | 3.89E-01 | NS | 4.80E-02 | 1.2 | 9.59E-01 | NS |
| A_42_P753198 | NM_001109025 | 407784 | Rnf5       | ring finger protein 5                                                                        | 8.42E-01 | NS | 4.78E-02 | 1.2 | 5.74E-01 | NS |
| A_64_P044151 | NM_001024354 | 500900 | Lrrc14     | leucine rich repeat containing 14                                                            | 7.02E-02 | NS | 1.08E-02 | 1.2 | 1.47E-01 | NS |
| A_64_P111963 | XR_009388    |        |            |                                                                                              | 1.50E-01 | NS | 4.90E-02 | 1.2 | 7.68E-01 | NS |
| A_44_P168713 | NM_022501    | 338401 | Crip2      | cysteine-rich protein 2                                                                      | 5.28E-01 | NS | 3.97E-02 | 1.2 | 3.92E-01 | NS |

|               |              |        |            |                                                                    |          |    |          |     |          |      |
|---------------|--------------|--------|------------|--------------------------------------------------------------------|----------|----|----------|-----|----------|------|
| A_44_P323664  | XM_341363    | 361080 | RGD1559682 | similar to peptidylprolyl isomerase A (cyclophilin A))             | 6.41E-02 | NS | 4.09E-02 | 1.2 | 8.29E-02 | NS   |
| A_44_P275029  | NM_022715    | 64681  | Mvp        | major vault protein                                                | 3.67E-01 | NS | 3.33E-02 | 1.2 | 4.51E-01 | NS   |
| A_64_P056746  | NM_022386    | 64188  | Mafg       | v-maf musculoaponeurotic fibrosarcoma oncogene homolog G (avian)   | 4.28E-01 | NS | 4.77E-02 | 1.2 | 7.50E-01 | NS   |
| A_64_P082113  | NM_001106529 | 296284 | Kif3b      | kinesin family member 3B                                           | 5.07E-01 | NS | 2.99E-02 | 1.2 | 3.72E-01 | NS   |
| A_43_P12212   | NM_022383    | 64185  | Cap1       | CAP, adenylate cyclase-associated protein 1 (yeast)                | 3.34E-01 | NS | 2.15E-02 | 1.2 | 3.18E-01 | NS   |
| A_64_P128887  | NM_053735    | 114554 | Pi4k2a     | phosphatidylinositol 4-kinase type 2 alpha                         | 2.34E-01 | NS | 4.30E-02 | 1.2 | 5.64E-02 | NS   |
| A_43_P15727   | NM_031322    | 83469  | Lrp4       | low density lipoprotein receptor-related protein 4                 | 4.51E-01 | NS | 3.60E-02 | 1.2 | 1.78E-01 | NS   |
| A_44_P459741  | NM_001004443 | 300757 | Hexa       | hexosaminidase A                                                   | 4.43E-01 | NS | 1.12E-02 | 1.2 | 6.14E-01 | NS   |
| A_64_P146984  | NM_031330    | 83498  | Hnrnpab    | heterogeneous nuclear ribonucleoprotein A/B                        | 7.25E-02 | NS | 2.46E-02 | 1.2 | 9.04E-01 | NS   |
| A_64_P166494  | BC072483     | 83527  | Dbnl       | drebrin-like                                                       | 9.53E-02 | NS | 1.62E-02 | 1.2 | 9.33E-01 | NS   |
| A_64_P016373  | XM_001081955 | 289350 | Rab3gap2   | RAB3 GTPase activating protein subunit 2                           | 6.40E-01 | NS | 4.54E-02 | 1.2 | 1.65E-01 | NS   |
| A_64_P118658  | NM_021766    | 291948 | Pgrmc1     | progesterone receptor membrane component 1                         | 8.06E-01 | NS | 2.72E-02 | 1.2 | 2.79E-01 | NS   |
| A_43_P18171   | NM_001008893 | 307858 | Ldhd       | lactate dehydrogenase D                                            | 1.59E-01 | NS | 3.56E-02 | 1.2 | 7.60E-02 | NS   |
| A_43_P16155   | XM_001070228 | 114486 | Braf       | v-raf murine sarcoma viral oncogene homolog B1                     | 2.10E-01 | NS | 2.39E-02 | 1.2 | 3.58E-01 | NS   |
| A_64_P021902  | NM_147142    | 257650 | LOC257650  | hippyragranin                                                      | 4.72E-01 | NS | 3.31E-02 | 1.2 | 8.44E-01 | NS   |
| A_42_P768799  | NM_031774    | 83583  | Rabac1     | Rab acceptor 1 (prenylated)                                        | 3.04E-01 | NS | 6.94E-03 | 1.2 | 2.50E-01 | NS   |
| A_44_P387331  | XM_001079061 |        |            |                                                                    | 1.01E-01 | NS | 4.24E-02 | 1.2 | 8.39E-02 | NS   |
| A_64_P066785  | NM_001009633 | 289468 | Fam175a    | family with sequence similarity 175, member A                      | 1.44E-01 | NS | 2.32E-02 | 1.2 | 9.65E-01 | NS   |
| A_44_P430581  | NM_001106301 | 293528 | Nsmce4a    | non-SMC element 4 homolog A (S. cerevisiae)                        | 1.11E-01 | NS | 2.72E-02 | 1.2 | 1.30E-01 | NS   |
| A_42_P801379  | NM_199114    | 360903 | Fgfr1      | fibroblast growth factor receptor-like 1                           | 1.24E-01 | NS | 3.76E-02 | 1.2 | 1.24E-01 | NS   |
| A_42_P755665  | NM_001013154 | 309457 | Pcgf6      | polycomb group ring finger 6                                       | 1.77E-01 | NS | 3.26E-02 | 1.2 | 4.99E-01 | NS   |
| A_64_P023633  | NM_175761    | 299331 | Hsp90aa1   | heat shock protein 90, alpha (cytosolic), class A member 1         | 8.98E-02 | NS | 4.29E-02 | 1.2 | 6.33E-01 | NS   |
| A_64_P160111  | XM_001061861 | 685003 | LOC685003  | similar to Leydig cell tumor 10 kDa protein                        | 2.80E-01 | NS | 2.52E-02 | 1.2 | 3.67E-01 | NS   |
| A_44_P1039678 | NM_001113747 | 245975 | Setd4      | SET domain containing 4                                            | 5.78E-02 | NS | 2.51E-02 | 1.2 | 5.42E-01 | NS   |
| A_44_P105156  | NM_001013069 | 293150 | Stard10    | STAR-related lipid transfer (START) domain containing 10           | 8.46E-01 | NS | 4.61E-02 | 1.2 | 9.27E-01 | NS   |
| A_44_P203195  | NM_053585    | 94193  | Madd       | MAP-kinase activating death domain                                 | 4.88E-01 | NS | 1.61E-02 | 1.2 | 5.50E-01 | NS   |
| A_44_P196456  | NM_031037    | 81667  | Gnb2       | guanine nucleotide binding protein (G protein), beta polypeptide 2 | 1.30E-01 | NS | 1.95E-02 | 1.2 | 2.39E-01 | NS   |
| A_44_P1007613 | XM_220219    | 302973 | Abca3      | ATP-binding cassette, sub-family A (ABC1), member 3                | 1.02E-01 | NS | 2.45E-02 | 1.2 | 2.78E-02 | -1.9 |
| A_43_P21715   | NM_001100559 | 304132 | Rwdd2b     | RWD domain containing 2B                                           | 7.17E-01 | NS | 4.68E-02 | 1.2 | 5.53E-01 | NS   |
| A_64_P164232  | NM_001107756 | 311257 | RGD1306717 | similar to hypothetical protein MGC25461                           | 3.94E-01 | NS | 3.37E-02 | 1.2 | 2.22E-01 | NS   |
| A_64_P050545  | NM_001012193 | 362757 | Rdh11      | retinol dehydrogenase 11 (all-trans/9-cis/11-cis)                  | 7.26E-02 | NS | 3.21E-02 | 1.2 | 8.55E-02 | NS   |
| A_64_P082381  | NM_001108240 | 316916 | Cliptm1l   | CLPTM1-like                                                        | 5.74E-02 | NS | 1.47E-02 | 1.2 | 3.68E-01 | NS   |
| A_44_P1034637 | NM_001012068 | 309070 | Uros       | uroporphyrinogen III synthase                                      | 4.97E-01 | NS | 4.50E-02 | 1.2 | 7.84E-01 | NS   |
| A_64_P021831  | NM_001107429 | 307848 | Fuk        | fucokinase                                                         | 7.80E-01 | NS | 7.68E-03 | 1.2 | 3.51E-01 | NS   |
| A_44_P189406  | NM_001004265 | 311331 | Spint1     | serine peptidase inhibitor, Kunitz type 1                          | 3.67E-01 | NS | 3.05E-02 | 1.2 | 1.18E-01 | NS   |
| A_64_P070926  | XM_001077085 |        |            |                                                                    | 6.41E-01 | NS | 4.71E-02 | 1.2 | 8.21E-01 | NS   |
| A_44_P487841  | NM_001013252 | 300965 | Srprb      | signal recognition particle receptor, B subunit                    | 5.08E-01 | NS | 1.36E-02 | 1.2 | 5.28E-01 | NS   |
| A_64_P037425  | NM_001008722 | 292060 | Irf8       | interferon regulatory factor 8                                     | 2.74E-01 | NS | 2.10E-02 | 1.2 | 2.60E-02 | -1.4 |
| A_44_P479286  | AI058285     |        |            |                                                                    | 1.78E-01 | NS | 4.55E-02 | 1.2 | 8.11E-01 | NS   |
| A_44_P1026917 | NM_001030033 | 302499 | C1galt1c1  | C1GALT1-specific chaperone 1                                       | 5.10E-02 | NS | 2.91E-02 | 1.2 | 1.15E-01 | NS   |
| A_44_P367624  | AY321321     |        |            |                                                                    | 1.90E-01 | NS | 2.52E-02 | 1.2 | 1.77E-01 | NS   |
| A_42_P540518  | NM_199399    | 316136 | Gpr108     | G protein-coupled receptor 108                                     | 8.81E-02 | NS | 1.27E-02 | 1.2 | 1.12E-01 | NS   |
| A_44_P337094  | NM_013010    | 25520  | Prkag1     | protein kinase, AMP-activated, gamma 1 non-catalytic subunit       | 2.55E-01 | NS | 2.28E-02 | 1.2 | 3.88E-01 | NS   |



|               |              |           |            |                                                                                                                  |          |    |          |     |          |      |
|---------------|--------------|-----------|------------|------------------------------------------------------------------------------------------------------------------|----------|----|----------|-----|----------|------|
| A_42_P701161  | NM_001033666 | 502674    | Dstn       | destrin                                                                                                          | 6.36E-02 | NS | 1.32E-02 | 1.2 | 4.71E-02 | -1.6 |
| A_64_P070818  | NM_001077585 | 685814    | Cnpy2      | canopy 2 homolog (zebrafish)                                                                                     | 1.17E-01 | NS | 4.55E-02 | 1.2 | 6.05E-02 | NS   |
| A_64_P121995  | NM_001108305 | 360662    | Sap30bp    | SAP30 binding protein                                                                                            | 5.66E-02 | NS | 2.61E-02 | 1.2 | 7.23E-01 | NS   |
| A_43_P21719   | NM_001106818 | 300679    | Mpz12      | myelin protein zero-like 2                                                                                       | 4.07E-01 | NS | 1.01E-02 | 1.2 | 4.62E-01 | NS   |
| A_64_P005043  | NM_001009271 | 290558    | Nt5dc2     | 5'-nucleotidase domain containing 2                                                                              | 7.57E-02 | NS | 2.59E-02 | 1.2 | 1.38E-01 | NS   |
| A_43_P22310   | NM_001108022 | 314128    | RGD1304624 | similar to RIKEN cDNA 2700097009<br>general transcription factor IIE, polypeptide 2, beta                        | 2.06E-01 | NS | 2.70E-02 | 1.2 | 5.78E-01 | NS   |
| A_44_P1028065 | NM_001107318 | 306516    | Gtf2e2     | glutathione S-transferase, theta 3                                                                               | 1.35E-01 | NS | 1.17E-02 | 1.2 | 9.90E-01 | NS   |
| A_44_P1015203 | NM_001137643 | 499422    | Gstt3      | glutathione S-transferase, theta 3                                                                               | 9.71E-01 | NS | 4.60E-02 | 1.2 | 8.68E-01 | NS   |
| A_44_P189292  | NM_145671    | 246757    | Klh17      | kelch-like 17 (Drosophila)                                                                                       | 2.39E-01 | NS | 1.13E-02 | 1.2 | 3.76E-02 | 1.8  |
| A_44_P539047  | NM_001106179 | 291963    | Tmem208    | transmembrane protein 208                                                                                        | 7.57E-02 | NS | 2.92E-02 | 1.2 | 5.60E-02 | NS   |
| A_64_P221683  | NM_001106421 | 294900    | Tpd52      | tumor protein D52<br>aldo-keto reductase family 1, member A1 (aldehyde reductase)                                | 8.32E-01 | NS | 4.97E-02 | 1.2 | 2.88E-01 | NS   |
| A_42_P570919  | NM_031000    | 78959     | Akr1a1     | aldo-keto reductase family 1, member A1 (aldehyde reductase)                                                     | 1.44E-01 | NS | 3.85E-03 | 1.2 | 6.45E-01 | NS   |
| A_64_P135182  | NM_001008348 | 309172    | Frm8       | FERM domain containing 8                                                                                         | 2.43E-01 | NS | 4.26E-02 | 1.2 | 8.24E-02 | NS   |
| A_44_P548241  | NM_001107467 | 308232    | Zfp51      | zinc finger protein 51<br>phospholipase A2, group IVA (cytosolic, calcium-dependent)                             | 2.43E-01 | NS | 1.48E-02 | 1.2 | 9.18E-01 | NS   |
| A_44_P477620  | NM_133551    | 24653     | Pla2g4a    | phospholipase A2, group IVA (cytosolic, calcium-dependent)                                                       | 7.65E-02 | NS | 4.76E-02 | 1.2 | 4.10E-01 | NS   |
| A_43_P17141   | NM_206851    | 289372    | Smyd2      | SET and MYND domain containing 2                                                                                 | 8.30E-01 | NS | 6.60E-03 | 1.2 | 7.56E-01 | NS   |
| A_44_P199077  | NM_001034937 | 361094    | Ubac2      | UBA domain containing 2                                                                                          | 2.65E-01 | NS | 2.92E-02 | 1.2 | 1.19E-01 | NS   |
| A_64_P100240  | NM_001127549 | 360661    | Llg12      | lethal giant larvae homolog 2 (Drosophila)                                                                       | 9.19E-01 | NS | 4.51E-02 | 1.2 | 6.25E-01 | NS   |
| A_43_P17139   | NM_001009625 | 287719    | Ifi35      | interferon-induced protein 35                                                                                    | 8.05E-02 | NS | 2.42E-02 | 1.2 | 4.11E-01 | NS   |
| A_64_P054853  | NM_001134762 | 501088    | Tbc1d5     | TBC1 domain family, member 5                                                                                     | 5.06E-01 | NS | 1.54E-02 | 1.2 | 4.24E-01 | NS   |
| A_64_P353328  | XM_002729753 |           |            |                                                                                                                  | 2.74E-01 | NS | 3.57E-02 | 1.2 | 2.15E-01 | NS   |
| A_64_P103249  | NM_001109678 | 100125370 | Nadk       | NAD kinase                                                                                                       | 6.29E-01 | NS | 3.44E-02 | 1.2 | 6.47E-01 | NS   |
| A_42_P471507  | NM_138919    | 192356    | Unc50      | unc-50 homolog (C. elegans)                                                                                      | 1.10E-01 | NS | 2.80E-02 | 1.2 | 2.22E-01 | NS   |
| A_42_P561329  | NM_001107771 | 311412    | Anapc1     | anaphase promoting complex subunit 1                                                                             | 1.66E-01 | NS | 1.24E-02 | 1.2 | 9.92E-01 | NS   |
| A_64_P109904  | XR_009382    |           |            |                                                                                                                  | 1.38E-01 | NS | 2.42E-02 | 1.2 | 8.65E-01 | NS   |
| A_44_P508613  | NM_001106315 | 293619    | Pkp3       | plakophilin 3                                                                                                    | 5.12E-01 | NS |          | 1.2 | 1.63E-01 | NS   |
| A_44_P260268  | NM_001006962 | 290232    | Tinf2      | TERF1 (TRF1)-interacting nuclear factor 2                                                                        | 6.62E-01 | NS | 1.70E-02 | 1.2 | 1.35E-01 | NS   |
| A_64_P041323  | NM_030996    | 29336     | Sigmar1    | sigma non-opioid intracellular receptor 1                                                                        | 2.58E-01 | NS | 2.71E-02 | 1.2 | 8.31E-01 | NS   |
| A_64_P105850  | NM_001108648 | 362441    | Itfg2      | integrin alpha FG-GAP repeat containing 2<br>similar to putative mitochondrial protein (2B324)                   | 4.91E-01 | NS | 3.53E-02 | 1.2 | 7.61E-01 | NS   |
| A_64_P021310  | XM_344647    | 364810    | RGD1561656 | similar to putative mitochondrial protein (2B324)                                                                | 1.43E-01 | NS | 1.94E-02 | 1.2 | 8.50E-02 | NS   |
| A_64_P057650  | XM_218008    | 308222    | Wdr27      | WD repeat domain 27<br>polymerase (RNA) III (DNA directed) polypeptide E                                         | 2.69E-01 | NS | 1.44E-02 | 1.2 | 8.83E-01 | NS   |
| A_44_P102774  | NM_001108503 | 361640    | Polr3e     | polypeptide E<br>LSM2 homolog, U6 small nuclear RNA associated (S. cerevisiae)                                   | 1.84E-01 | NS | 2.76E-02 | 1.2 | 3.86E-02 | 1.5  |
| A_42_P473886  | NM_001165922 | 684148    | Lsm2       | LSM2 homolog, U6 small nuclear RNA associated (S. cerevisiae)<br>IQ motif containing GTPase activating protein 3 | 3.24E-01 | NS | 2.67E-02 | 1.2 | 2.51E-01 | NS   |
| A_64_P182546  | XM_001068995 | 310621    | Iqgap3     | IQ motif containing GTPase activating protein 3                                                                  | 1.83E-01 | NS |          | 1.2 | 7.20E-01 | NS   |
| A_64_P029745  | NM_001099340 | 503018    | Wdr35l     | WD repeat domain 35-like                                                                                         | 1.25E-01 | NS | 3.62E-02 | 1.2 | 7.39E-01 | NS   |
| A_44_P545727  | NM_053760    | 114635    | Traf1      | TRAF type zinc finger domain containing 1<br>DALR anticodon binding domain containing 3                          | 2.62E-01 | NS | 3.74E-02 | 1.2 | 1.66E-01 | NS   |
| A_44_P806655  | NM_001014214 | 363146    | Dalrd3     | DALR anticodon binding domain containing 3                                                                       | 6.13E-02 | NS | 5.60E-03 | 1.2 | 7.22E-01 | NS   |
| A_44_P1026139 | NM_001134983 | 499929    | RGD1564927 | similar to TGFB-induced factor 2<br>2-oxoglutarate and iron-dependent oxygenase domain containing 2              | 6.33E-02 | NS | 4.18E-02 | 1.2 | 1.19E-01 | NS   |
| A_44_P276530  | NM_001105927 | 288657    | Ogfod2     | 2-oxoglutarate and iron-dependent oxygenase domain containing 2                                                  | 2.19E-01 | NS | 2.41E-02 | 1.2 | 3.63E-01 | NS   |
| A_64_P053437  | NM_013199    | 25751     | Dnm2       | dynamitin 2<br>choline/ethanolamine phosphotransferase 1                                                         | 6.74E-01 | NS | 1.29E-02 | 1.2 | 2.86E-01 | NS   |
| A_44_P245916  | NM_001007699 | 310773    | Cept1      | choline/ethanolamine phosphotransferase 1                                                                        | 8.72E-01 | NS | 4.63E-02 | 1.2 | 7.08E-02 | NS   |
| A_64_P064173  | NM_001033695 | 300320    | L3mbtl2    | l(3)mbt-like 2 (Drosophila)                                                                                      | 3.74E-01 | NS | 3.14E-02 | 1.2 | 3.57E-01 | NS   |
| A_42_P792760  | NM_001012191 | 362715    | Dtnb       | dystrobrevin, beta                                                                                               | 1.06E-01 | NS | 2.49E-02 | 1.2 | 2.97E-01 | NS   |
| A_44_P834980  | NM_001109668 | 361677    | Tollip     | toll interacting protein                                                                                         | 1.25E-01 | NS | 4.88E-02 | 1.2 | 4.09E-01 | NS   |
| A_64_P091415  | NM_001013036 | 192357    | Gmpr2      | guanosine monophosphate reductase 2<br>tubulin tyrosine ligase-like family, member 12                            | 6.70E-02 | NS | 2.38E-02 | 1.2 | 5.35E-01 | NS   |
| A_64_P015255  | NM_001135922 | 300105    | Tll12      | tubulin tyrosine ligase-like family, member 12                                                                   | 3.36E-01 | NS | 2.37E-02 | 1.2 | 6.79E-01 | NS   |
| A_64_P148183  | XM_001053588 |           |            |                                                                                                                  | 8.61E-02 | NS | 1.52E-02 | 1.2 | 2.27E-01 | NS   |
| A_42_P530662  | NM_138922    | 192363    | Nos1ap     | nitric oxide synthase 1 (neuronal) adaptor protein                                                               | 4.49E-01 | NS | 3.63E-02 | 1.2 | 1.31E-01 | NS   |

|               |              |           |            |                                                                                                            |          |    |          |     |          |      |
|---------------|--------------|-----------|------------|------------------------------------------------------------------------------------------------------------|----------|----|----------|-----|----------|------|
| A_44_P869351  | NM_001107779 | 311441    | Trmt6      | tRNA methyltransferase 6 homolog (S. cerevisiae)                                                           | 7.69E-02 | NS | 3.82E-02 | 1.2 | 4.05E-01 | NS   |
| A_44_P358782  | NM_001100702 | 310785    | Wdr47      | WD repeat domain 47                                                                                        | 6.20E-01 | NS | 2.05E-02 | 1.2 | 3.24E-01 | NS   |
| A_42_P814107  | NM_001024750 | 293144    | Pold3      | polymerase (DNA-directed), delta 3, accessory subunit                                                      | 1.13E-01 | NS | 1.06E-02 | 1.2 | 7.69E-01 | NS   |
| A_44_P575055  | NM_001017512 | 499094    | Zfp61      | zinc finger protein 61                                                                                     | 3.53E-01 | NS | 3.04E-02 | 1.2 | 8.94E-01 | NS   |
| A_44_P686876  | NM_001109037 | 497958    | Gemin4     | gem (nuclear organelle) associated protein 4                                                               | 2.88E-01 | NS | 1.47E-02 | 1.2 | 8.92E-01 | NS   |
| A_42_P756706  | NM_001108423 | 361293    | Riok3      | RIO kinase 3 (yeast)                                                                                       | 5.90E-02 | NS | 3.01E-02 | 1.2 | 7.35E-01 | NS   |
| A_64_P110018  | NM_001107003 | 303141    | Rapgef6    | Rap guanine nucleotide exchange factor (GEF) 6                                                             | 1.53E-01 | NS | 4.06E-02 | 1.2 | 1.35E-02 | -1.4 |
| A_44_P248634  | NM_001085485 | 315216    | Selo       | selenoprotein O                                                                                            | 5.43E-01 | NS | 5.53E-03 | 1.2 | 2.37E-01 | NS   |
| A_64_P083905  | NM_022958    | 65052     | Pik3c3     | phosphoinositide-3-kinase, class 3                                                                         | 1.97E-01 | NS | 2.73E-02 | 1.2 | 3.06E-01 | NS   |
| A_64_P015022  | NM_031969    | 24242     | Calm1      | calmodulin 1                                                                                               | 3.03E-01 | NS | 3.18E-02 | 1.2 | 2.19E-03 | -1.5 |
| A_44_P132533  | NM_001105869 | 288003    | Rfc4       | replication factor C (activator 1) 4                                                                       | 5.73E-02 | NS | 4.67E-02 | 1.2 | 3.65E-01 | NS   |
| A_44_P107634  | NM_001013995 | 305882    | Haus4      | HAUS augmin-like complex, subunit 4                                                                        | 2.25E-01 | NS | 7.20E-03 | 1.2 | 1.63E-01 | NS   |
| A_44_P363647  | NM_001134979 | 312299    | Ezh2       | enhancer of zeste homolog 2 (Drosophila)                                                                   | 8.87E-02 | NS | 4.95E-02 | 1.2 | 2.51E-01 | NS   |
| A_44_P296924  | NM_181478    | 353252    | Rdh10      | retinol dehydrogenase 10 (all-trans) processing of precursor 4, ribonuclease P/MRP subunit (S. cerevisiae) | 2.55E-01 | NS | 4.92E-02 | 1.2 | 2.40E-01 | NS   |
| A_64_P140040  | NM_001009642 | 292831    | Pop4       | P/MRP subunit (S. cerevisiae)                                                                              | 2.13E-01 | NS | 2.12E-02 | 1.2 | 5.73E-01 | NS   |
| A_44_P173935  | NM_001170586 | 100322884 | Sdccag1    | serologically defined colon cancer antigen 1                                                               | 1.26E-01 | NS | 1.43E-02 | 1.2 | 6.10E-01 | NS   |
| A_64_P138281  | NM_001008366 | 361416    | Cenpn      | centromere protein N                                                                                       | 5.36E-02 | NS | 3.38E-02 | 1.2 | 7.35E-01 | NS   |
| A_43_P17605   | NM_001106138 | 291539    | Psmg2      | proteasome (prosome, macropain) assembly chaperone 2                                                       | 8.01E-02 | NS | 1.86E-02 | 1.2 | 9.74E-02 | NS   |
| A_64_P025217  | NM_001106076 | 290659    | Cope       | coatomer protein complex, subunit epsilon                                                                  | 1.40E-01 | NS | 8.04E-03 | 1.2 | 6.27E-01 | NS   |
| A_64_P005203  | XM_001075013 | 365408    | Ms4a15     | A, member 15                                                                                               | 9.31E-01 | NS | 3.41E-02 | 1.2 | 5.56E-01 | NS   |
| A_64_P015479  | NM_001107146 | 304528    | Rfc5       | replication factor C (activator 1) 5                                                                       | 5.13E-02 | NS | 2.53E-02 | 1.2 | 3.57E-01 | NS   |
| A_64_P023995  | NM_001108953 | 366029    | Zbtb6      | zinc finger and BTB domain containing 6                                                                    | 2.12E-01 | NS | 3.39E-02 | 1.2 | 1.55E-01 | NS   |
| A_44_P1043145 | NM_001007145 | 307505    | Ctnna1     | catenin (cadherin associated protein), alpha 1                                                             | 8.02E-01 | NS | 2.94E-03 | 1.2 | 3.67E-01 | NS   |
| A_64_P377855  | XM_002729125 | 685374    | Ankr13c    | ankyrin repeat domain 13C family with sequence similarity 173, member A                                    | 1.39E-01 | NS | 2.99E-02 | 1.2 | 1.96E-02 | -1.6 |
| A_42_P713737  | NM_001127447 | 287150    | Fam173a    | family with sequence similarity 173, member A                                                              | 8.68E-02 | NS | 1.10E-02 | 1.2 | 9.78E-01 | NS   |
| A_64_P166385  | NM_001005878 | 294286    | Kifc1      | kinesin family member C1                                                                                   | 7.13E-01 | NS | 1.87E-02 | 1.2 | 5.78E-02 | NS   |
| A_44_P809032  | NM_001109263 | 500527    | RGD1566001 | similar to DNA segment, Chr 4, Brigham & Womens Genetics 0951 expressed                                    | 1.02E-01 | NS | 2.71E-02 | 1.2 | 1.12E-02 | -1.9 |
| A_44_P119435  | NM_001013092 | 298400    | Creb3      | cAMP responsive element binding protein 3                                                                  | 1.12E-01 | NS | 1.32E-02 | 1.2 | 3.18E-01 | NS   |
| A_64_P064858  | XM_001068456 | 684006    | LOC684006  | similar to zinc finger protein 617                                                                         | 2.72E-01 | NS | 2.65E-02 | 1.2 | 7.41E-01 | NS   |
| A_44_P338381  | XM_001060172 | 312166    | Cadps2     | Ca++-dependent secretion activator 2                                                                       | 1.31E-01 | NS | 3.33E-02 | 1.2 | 1.08E-01 | NS   |
| A_64_P096239  | XM_002727303 |           |            |                                                                                                            | 9.23E-02 | NS | 3.86E-02 | 1.2 | 1.98E-01 | NS   |
| A_42_P799306  | BC088314     | 300442    | Ccdc159    | coiled-coil domain containing 159                                                                          | 2.20E-01 | NS | 4.65E-02 | 1.2 | 2.32E-01 | NS   |
| A_44_P187640  | NM_001109024 | 368190    | Dnajc30    | DnaJ (Hsp40) homolog, subfamily C, member 30                                                               | 7.17E-01 | NS | 4.70E-02 | 1.2 | 2.57E-01 | NS   |
| A_64_P003261  | NM_001134762 | 501088    | Tbc1d5     | TBC1 domain family, member 5                                                                               | 2.85E-01 | NS | 4.49E-02 | 1.2 | 1.74E-01 | NS   |
| A_64_P058148  | XM_002726605 |           |            |                                                                                                            | 6.14E-01 | NS | 4.39E-02 | 1.2 | 6.46E-02 | NS   |
| A_64_P061596  | NM_001106415 | 294787    | Nipbl      | Nipped-B homolog (Drosophila)                                                                              | 1.69E-01 | NS | 3.12E-02 | 1.2 | 1.17E-01 | NS   |
| A_64_P071263  | XM_223435    |           |            |                                                                                                            | 2.16E-01 | NS | 4.14E-02 | 1.2 | 1.29E-01 | NS   |
| A_44_P1011008 | XM_001060853 | 302526    | Atp6ap2    | ATPase, H+ transporting, lysosomal accessory protein 2                                                     | 2.47E-01 | NS | 1.08E-02 | 1.2 | 9.14E-01 | NS   |
| A_44_P184955  | XM_001066026 | 293148    | C2cd3      | C2 calcium-dependent domain containing 3                                                                   | 4.53E-01 | NS | 1.29E-02 | 1.2 | 7.92E-01 | NS   |
| A_44_P341801  | NM_172039    | 64474     | Hdlbp      | high density lipoprotein binding protein                                                                   | 3.54E-01 | NS | 7.28E-03 | 1.2 | 2.68E-01 | NS   |
| A_43_P19657   | NM_001107903 | 312946    | Tmem68     | transmembrane protein 68                                                                                   | 3.34E-01 | NS | 4.40E-02 | 1.2 | 1.40E-01 | NS   |
| A_43_P18736   | XM_342224    |           |            |                                                                                                            | 5.84E-01 | NS | 1.55E-02 | 1.2 | 4.17E-01 | NS   |
| A_64_P142675  | NM_001130569 | 362971    | Mpped1     | metallophosphoesterase domain containing 1                                                                 | 1.36E-01 | NS | 2.92E-02 | 1.2 | 3.72E-01 | NS   |

|               |              |           |              |                                                                                            |          |    |          |     |          |      |
|---------------|--------------|-----------|--------------|--------------------------------------------------------------------------------------------|----------|----|----------|-----|----------|------|
| A_42_P809869  | NM_012808    | 25274     | Tst          | thiosulfate sulfurtransferase                                                              | 6.67E-01 | NS | 4.23E-02 | 1.2 | 3.81E-01 | NS   |
| A_44_P347325  | NM_001005547 | 300733    | Tspan3       | tetraspanin 3                                                                              | 5.45E-01 | NS | 3.55E-03 | 1.2 | 3.06E-01 | NS   |
| A_64_P044420  | NM_001134983 | 499929    | RGD1564927   | similar to TGFB-induced factor 2                                                           | 4.97E-01 | NS | 2.89E-02 | 1.2 | 7.68E-01 | NS   |
| A_44_P168112  | NM_001007608 | 287280    | Skp1         | S-phase kinase-associated protein 1                                                        | 8.51E-02 | NS | 4.40E-02 | 1.2 | 1.87E-01 | NS   |
| A_44_P304043  | NM_153303    | 266606    | Dyt1         | dystonia 1                                                                                 | 2.44E-01 | NS | 1.43E-02 | 1.2 | 4.75E-01 | NS   |
| A_64_P089091  | NM_001025625 | 287155    | Stub1        | protein 1                                                                                  | 6.20E-02 | NS | 9.11E-03 | 1.2 | 2.05E-01 | NS   |
| A_64_P087748  | NM_001106853 | 300989    | Hemk1        | HemK methyltransferase family member 1                                                     | 9.33E-02 | NS | 3.09E-03 | 1.2 | 7.91E-01 | NS   |
| A_64_P081183  | NM_199383    | 298312    | Yipf1        | Yip1 domain family, member 1                                                               | 9.35E-02 | NS | 4.60E-02 | 1.2 | 4.01E-02 | -1.7 |
| A_44_P298210  | NM_022277    | 64044     | Casp8        | caspase 8                                                                                  | 6.85E-01 | NS | 3.40E-02 | 1.2 | 7.51E-02 | NS   |
| A_44_P407849  | NM_001106506 | 296136    | Nphp1        | nephronophthisis 1 (juvenile) homolog (human)                                              | 2.10E-01 | NS | 3.84E-03 | 1.2 | 3.57E-01 | NS   |
| A_42_P487031  | NM_001009539 | 494342    | B4galt3      | UDP-Gal:betaGlcNAc beta 1,4-galactosyltransferase, polypeptide 3                           | 5.97E-02 | NS | 3.91E-02 | 1.2 | 4.00E-02 | -1.8 |
| A_42_P798776  | XM_002725203 | 100364957 | LOC100364957 | RGD1560755 protein-like                                                                    | 1.81E-01 | NS | 3.46E-02 | 1.2 | 3.43E-01 | NS   |
| A_64_P086635  | XM_575954    | 500585    | RGD1561413   | similar to BC021442 protein                                                                | 5.24E-01 | NS | 4.40E-02 | 1.2 | 6.36E-02 | NS   |
| A_64_P115147  | NM_017213    | 29479     | Odf2         | outer dense fiber of sperm tails 2 required for meiotic nuclear division 5                 | 6.61E-02 | NS | 2.37E-02 | 1.2 | 7.74E-01 | NS   |
| A_44_P246311  | NM_001017473 | 497900    | Rmnd5b       | homolog B (S. cerevisiae)                                                                  | 2.20E-01 | NS | 4.85E-03 | 1.2 | 1.94E-01 | NS   |
| A_44_P245101  | NM_001006987 | 300791    | Spg21        | spastic paraplegia 21 homolog (human)                                                      | 4.58E-01 | NS | 2.95E-02 | 1.2 | 9.91E-01 | NS   |
| A_64_P120529  | NM_001108147 | 315666    | Npat         | nuclear protein, ataxia-telangiectasia locus                                               | 5.69E-02 | NS | 2.79E-02 | 1.2 | 1.10E-01 | NS   |
| A_64_P016503  | XM_001069712 |           |              |                                                                                            | 4.79E-01 | NS | 4.37E-02 | 1.2 | 3.10E-01 | NS   |
| A_44_P342750  | NM_001134466 | 299828    | Xrcc6bp1     | XRCC6 binding protein 1                                                                    | 1.51E-01 | NS | 4.76E-02 | 1.2 | 9.29E-02 | NS   |
| A_64_P057575  | XM_001057159 | 499957    | Samd10       | sterile alpha motif domain containing 10                                                   | 2.95E-01 | NS | 1.24E-02 | 1.2 | 5.89E-01 | NS   |
| A_64_P163812  | XR_007941    |           |              |                                                                                            | 5.17E-02 | NS | 1.18E-02 | 1.2 | 5.85E-01 | NS   |
| A_64_P124126  | XM_001075615 | 690785    | LOC690785    | hypothetical protein LOC690785                                                             | 8.17E-02 | NS | 3.93E-02 | 1.2 | 1.06E-02 | -1.7 |
| A_64_P016970  | NM_017101    | 25518     | Ppia         | peptidylprolyl isomerase A (cyclophilin A)                                                 | 2.10E-01 | NS | 2.03E-02 | 1.2 | 2.06E-02 | -1.4 |
| A_44_P482796  | XM_001061408 |           |              |                                                                                            | 1.64E-01 | NS | 1.72E-02 | 1.2 | 2.81E-01 | NS   |
| A_64_P014000  | NM_134398    | 171435    | Aagab        | alpha- and gamma-adaptin binding protein                                                   | 8.72E-01 | NS | 7.47E-03 | 1.2 | 2.97E-01 | NS   |
| A_44_P441039  | NM_001107955 | 313491    | Hint2        | histidine triad nucleotide binding protein 2 similar to chromosome 1 open reading frame 63 | 5.03E-02 | NS | 7.23E-03 | 1.2 | 3.99E-02 | -1.5 |
| A_64_P054193  | NM_001014193 | 362626    | RGD1359529   | frame 63                                                                                   | 2.27E-01 | NS | 3.68E-02 | 1.2 | 4.60E-01 | NS   |
| A_44_P553017  | FQ211507     | 192357    | Gmpr2        | guanosine monophosphate reductase 2                                                        | 9.85E-02 | NS | 4.37E-03 | 1.2 | 3.98E-01 | NS   |
| A_43_P21117   | NM_001107143 | 304512    | Rbm19        | RNA binding motif protein 19                                                               | 7.27E-01 | NS | 3.75E-02 | 1.2 | 3.44E-01 | NS   |
| A_64_P110971  | NM_001014106 | 499328    | Rfk          | riboflavin kinase                                                                          | 3.32E-01 | NS | 4.99E-02 | 1.2 | 1.65E-02 | -1.6 |
| A_42_P714075  | NM_031723    | 65166     | Sec11a       | SEC11 homolog A (S. cerevisiae)                                                            | 7.10E-02 | NS | 3.57E-02 | 1.2 | 2.76E-01 | NS   |
| A_42_P540908  | NM_001100505 | 288919    | Asna1        | homolog 1 (bacterial)                                                                      | 9.43E-01 | NS | 1.93E-02 | 1.2 | 1.38E-01 | NS   |
| A_64_P042736  | NM_001127373 | 307236    | Adnp2        | ADNP homeobox 2                                                                            | 8.13E-01 | NS | 2.80E-02 | 1.2 | 6.74E-01 | NS   |
| A_44_P543548  | NM_057119    | 117259    | Tra2b        | transformer 2 beta homolog (Drosophila)                                                    | 1.30E-01 | NS | 3.60E-02 | 1.2 | 6.99E-01 | NS   |
| A_44_P945759  | NM_001025770 | 500069    | Tsga14       | testis specific, 14                                                                        | 7.36E-02 | NS | 3.73E-02 | 1.2 | 6.75E-01 | NS   |
| A_44_P217785  | XM_226606    | 294595    | Ttc37        | tetratricopeptide repeat domain 37                                                         | 5.52E-01 | NS | 2.33E-02 | 1.2 | 1.79E-01 | NS   |
| A_64_P154595  | NM_001080207 | 497984    | Znf652       | zinc finger protein 652                                                                    | 3.00E-01 | NS | 1.81E-02 | 1.2 | 2.50E-01 | NS   |
| A_64_P052435  | XM_001075102 | 361988    | Ints3        | integrator complex subunit 3 polymerase (RNA) III (DNA directed)                           | 9.94E-01 | NS | 6.49E-03 | 1.2 | 5.75E-01 | NS   |
| A_44_P335656  | XM_343188    | 362858    | Polr3b       | polypeptide B                                                                              | 3.44E-01 | NS | 3.93E-02 | 1.2 | 4.88E-02 | 1.7  |
| A_42_P812805  | NM_001106215 | 292401    | Smoc2        | SPARC related modular calcium binding 2                                                    | 1.36E-01 | NS | 2.35E-02 | 1.2 | 1.75E-02 | -2.2 |
| A_64_P123438  | NM_001167806 | 303790    | Smpd4        | sphingomyelin phosphodiesterase 4                                                          | 2.76E-01 | NS | 7.41E-03 | 1.2 | 1.50E-01 | NS   |
| A_44_P271842  | NM_001107468 | 308236    | Zfp53        | zinc finger protein 53                                                                     | 2.58E-01 | NS | 2.07E-02 | 1.2 | 1.15E-01 | NS   |
| A_44_P502793  | NM_001009714 | 363219    | Mitd1        | MIT, microtubule interacting and transport, domain containing 1                            | 2.81E-01 | NS | 3.96E-02 | 1.2 | 4.04E-01 | NS   |
| A_64_P015227  | NM_001107779 | 311441    | Trmt6        | tRNA methyltransferase 6 homolog (S. cerevisiae)                                           | 4.04E-01 | NS | 2.21E-02 | 1.2 | 6.94E-02 | NS   |
| A_44_P1037041 | NM_001107909 | 313022    | Map3k6       | mitogen-activated protein kinase kinase kinase 6                                           | 1.16E-01 | NS | 1.67E-02 | 1.2 | 5.45E-01 | NS   |
| A_64_P073208  | NM_198737    | 293551    | Arl6ip1      | ADP-ribosylation factor-like 6 interacting protein 1                                       | 1.32E-01 | NS | 4.66E-02 | 1.2 | 7.07E-01 | NS   |
| A_44_P438442  | XM_001069431 |           |              |                                                                                            | 4.49E-01 | NS | 6.95E-03 | 1.2 | 4.40E-01 | NS   |
| A_44_P389688  | NM_001107057 | 303602    | Dcaf7        | DDB1 and CUL4 associated factor 7                                                          | 6.46E-01 | NS | 1.70E-03 | 1.2 | 3.93E-02 | -1.3 |
| A_44_P328283  | XM_219706    | 309256    | Mtmr15       | myotubularin related protein 15                                                            | 3.66E-01 | NS | 2.68E-02 | 1.2 | 9.41E-01 | NS   |

|              |              |        |           |                                                                                |          |    |          |     |          |      |
|--------------|--------------|--------|-----------|--------------------------------------------------------------------------------|----------|----|----------|-----|----------|------|
| A_64_P058353 | NM_017101    | 25518  | Ppia      | peptidylprolyl isomerase A (cyclophilin A)                                     | 7.96E-02 | NS | 1.14E-02 | 1.2 | 6.43E-01 | NS   |
| A_64_P061730 | NM_001107263 | 305887 | Ngdn      | neuroguidin, EIF4E binding protein                                             | 3.16E-01 | NS | 8.17E-03 | 1.2 | 5.70E-01 | NS   |
| A_42_P537715 | NM_001025743 | 363064 | Wdr61     | WD repeat domain 61                                                            | 1.77E-01 | NS | 3.16E-02 | 1.2 | 6.07E-01 | NS   |
| A_64_P026581 | XM_001060456 |        |           |                                                                                | 3.72E-01 | NS | 8.51E-03 | 1.2 | 7.25E-01 | NS   |
| A_44_P286273 | XM_001067187 | 683719 | LOC683719 | similar to RAS and EF hand domain containing                                   | 8.00E-01 | NS | 3.76E-02 | 1.2 | 1.63E-01 | NS   |
| A_44_P189837 | NM_001108402 | 361185 | Carkd     | carbohydrate kinase domain containing                                          | 3.54E-01 | NS | 4.07E-02 | 1.2 | 8.05E-01 | NS   |
| A_64_P085803 | AY383695     |        |           |                                                                                | 4.89E-01 | NS | 2.58E-02 | 1.2 | 2.61E-01 | NS   |
| A_64_P019002 | NM_001039006 | 293023 | Klh25     | kelch-like 25 (Drosophila)                                                     | 7.45E-02 | NS | 2.95E-02 | 1.2 | 7.52E-02 | NS   |
| A_44_P975437 | NM_001012022 | 304407 | Cldn4     | claudin 4                                                                      | 7.04E-01 | NS | 2.77E-02 | 1.2 | 3.81E-02 | -2.7 |
| A_44_P991682 | NM_001106581 | 296849 | Pdk3      | pyruvate dehydrogenase kinase, isozyme 3                                       | 4.59E-01 | NS | 5.05E-03 | 1.2 | 6.03E-01 | NS   |
| A_43_P20449  | XM_001060521 | 360495 | Lmf1      | lipase maturation factor 1                                                     | 6.01E-01 | NS | 3.43E-02 | 1.2 | 3.66E-01 | NS   |
| A_42_P667148 | NM_057194    | 117540 | Plscr1    | phospholipid scramblase 1                                                      | 3.07E-01 | NS | 3.14E-02 | 1.2 | 4.80E-02 | -1.8 |
| A_64_P081198 | NM_001025747 | 363476 | Yipf6     | Yip1 domain family, member 6                                                   | 2.21E-01 | NS | 1.97E-02 | 1.2 | 6.68E-01 | NS   |
| A_64_P015946 | NM_001009720 | 494445 | Sfrs2     | splicing factor, arginine/serine-rich 2                                        | 1.13E-01 | NS | 1.74E-02 | 1.2 | 9.92E-01 | NS   |
| A_42_P548520 | NM_001100834 | 294504 | Ppa1      | pyrophosphatase (inorganic) 1                                                  | 1.81E-01 | NS | 1.61E-02 | 1.2 | 1.77E-02 | 1.3  |
| A_44_P494741 | NM_001134762 | 501088 | Tbc1d5    | TBC1 domain family, member 5                                                   | 2.08E-01 | NS | 1.17E-02 | 1.2 | 6.93E-01 | NS   |
| A_64_P039308 | XM_001065811 | 252962 | Phtf1     | putative homeodomain transcription factor 1                                    | 1.64E-01 | NS | 5.59E-03 | 1.2 | 9.28E-01 | NS   |
| A_64_P144913 | NM_001134874 | 314910 | Nab2      | Ngfi-A binding protein 2                                                       | 1.40E-01 | NS | 1.02E-02 | 1.2 | 1.48E-01 | NS   |
| A_44_P789473 | BF555532     |        |           |                                                                                | 4.52E-01 | NS | 5.80E-03 | 1.2 | 7.96E-02 | NS   |
| A_64_P087801 | NM_053635    | 114093 | St14      | suppression of tumorigenicity 14 (colon carcinoma)                             | 6.63E-02 | NS | 3.60E-02 | 1.2 | 6.34E-02 | NS   |
| A_44_P217604 | NM_031058    | 81709  | Msh2      | mutS homolog 2 (E. coli)                                                       | 7.04E-01 | NS | 3.03E-03 | 1.2 | 1.08E-01 | NS   |
| A_42_P538334 | XM_001062546 | 361111 | Snhg8     | small nucleolar RNA host gene (non-protein coding) 8                           | 8.62E-02 | NS | 2.31E-02 | 1.2 | 9.60E-02 | NS   |
| A_44_P436352 | NM_001106945 | 302422 | Pdzd11    | PDZ domain containing 11                                                       | 2.29E-01 | NS | 2.88E-02 | 1.2 | 1.23E-01 | NS   |
| A_42_P492195 | NM_172334    | 282837 | Fibp      | fibroblast growth factor (acidic) intracellular binding protein                | 5.85E-01 | NS | 3.21E-03 | 1.2 | 3.27E-01 | NS   |
| A_42_P502590 | NM_001107424 | 307811 | Slc7a6    | solute carrier family 7 (cationic amino acid transporter, y+ system), member 6 | 2.15E-01 | NS | 6.45E-03 | 1.2 | 1.83E-02 | 1.6  |
| A_44_P228891 | NM_024132    | 29347  | Faah      | fatty acid amide hydrolase                                                     | 9.50E-01 | NS | 4.52E-02 | 1.2 | 8.61E-01 | NS   |
| A_64_P078469 | NM_001025414 | 307492 | Hars      | histidyl-tRNA synthetase                                                       | 4.74E-01 | NS | 6.21E-03 | 1.2 | 5.37E-02 | NS   |
| A_64_P164315 | XR_086347    | 367311 | Arl4c     | ADP-ribosylation factor-like 4C                                                | 6.43E-01 | NS | 9.22E-03 | 1.2 | 6.72E-03 | -1.5 |
| A_44_P699502 | NM_001127591 | 687105 | LOC687105 | hypothetical protein LOC687105                                                 | 7.32E-02 | NS | 1.05E-02 | 1.2 | 9.62E-02 | NS   |
| A_64_P129618 | NM_001017459 | 314859 | Mdm1      | Mdm1 nuclear protein homolog (mouse)                                           | 1.18E-01 | NS | 4.07E-02 | 1.2 | 2.01E-02 | 2.2  |
| A_64_P050293 | NM_001108793 | 363213 | Ccdc115   | coiled-coil domain containing 115                                              | 2.34E-01 | NS | 2.29E-02 | 1.2 | 2.18E-01 | NS   |
| A_64_P035062 | NM_022931    | 65025  | Rims3     | regulating synaptic membrane exocytosis 3                                      | 7.10E-01 | NS | 3.60E-02 | 1.2 | 3.14E-01 | NS   |
| A_64_P025007 | NM_001134873 | 313560 | Ctps      | CTP synthase                                                                   | 6.20E-02 | NS | 3.76E-02 | 1.2 | 7.05E-01 | NS   |
| A_44_P885445 | NM_001109435 | 681096 | Fam55c    | family with sequence similarity 55, member C                                   | 1.92E-01 | NS | 1.88E-02 | 1.2 | 6.92E-01 | NS   |
| A_43_P17681  | NM_001012143 | 360665 | Jmjd6     | jumonji domain containing 6                                                    | 9.00E-01 | NS | 1.01E-02 | 1.2 | 1.83E-01 | NS   |
| A_64_P023431 | NM_001108651 | 362454 | Hebp1     | heme binding protein 1                                                         | 9.49E-02 | NS | 1.35E-02 | 1.2 | 1.33E-01 | NS   |
| A_64_P153671 | NM_001106949 | 302492 | Mbnl3     | muscleblind-like 3 (Drosophila)                                                | 5.09E-02 | NS | 3.06E-02 | 1.2 | 5.63E-01 | NS   |
| A_43_P13536  | NM_001108117 | 315345 | Copz1     | coatamer protein complex, subunit zeta 1                                       | 9.45E-01 | NS | 6.48E-03 | 1.2 | 6.41E-01 | NS   |
| A_64_P002695 | NM_001104613 | 362361 | Hnmpa2b1  | heterogeneous nuclear ribonucleoprotein A2/B1                                  | 1.11E-01 | NS | 2.70E-02 | 1.2 | 1.02E-01 | NS   |
| A_44_P318846 | NM_001108867 | 364382 | Prmt5     | protein arginine methyltransferase 5                                           | 5.94E-01 | NS | 9.19E-03 | 1.2 | 1.78E-01 | NS   |
| A_64_P046027 | NM_001013135 | 306322 | Sdccag3   | serologically defined colon cancer antigen 3                                   | 6.16E-01 | NS | 1.80E-03 | 1.2 | 4.62E-01 | NS   |
| A_43_P16427  | XM_001055542 |        |           |                                                                                | 2.31E-01 | NS | 4.57E-02 | 1.2 | 9.77E-01 | NS   |
| A_64_P004998 | NM_024147    | 79115  | Evl       | Enah/Vasp-like                                                                 | 2.44E-01 | NS | 2.53E-02 | 1.2 | 4.89E-01 | NS   |
| A_64_P012759 | NM_021774    | 60398  | Fhit      | fragile histidine triad gene                                                   | 1.87E-01 | NS | 4.66E-03 | 1.2 | 2.71E-02 | -1.7 |
| A_64_P144794 | NM_053301    | 29199  | Hfe       | hemochromatosis                                                                | 8.60E-01 | NS | 8.95E-03 | 1.2 | 6.45E-01 | NS   |
| A_64_P146762 | XM_001073169 | 686264 | LOC686264 | similar to Probable ATP-dependent RNA helicase DDX27 (DEAD box protein 27)     | 4.37E-01 | NS | 4.09E-02 | 1.2 | 8.59E-01 | NS   |
| A_44_P450562 | NM_001127522 | 287827 | Armc7     | armadillo repeat containing 7                                                  | 5.22E-02 | NS | 2.41E-02 | 1.2 | 4.38E-01 | NS   |
| A_44_P135678 | NM_001107795 | 311575 | Phf20     | PHD finger protein 20                                                          | 1.96E-01 | NS | 3.83E-03 | 1.2 | 7.63E-01 | NS   |

|               |              |        |            |                                               |          |    |          |     |          |     |
|---------------|--------------|--------|------------|-----------------------------------------------|----------|----|----------|-----|----------|-----|
| A_64_P040966  | XR_008086    |        |            |                                               | 6.56E-02 | NS | 4.52E-03 | 1.2 | 3.50E-01 | NS  |
| A_44_P459660  | XM_001053657 | 317308 | Zfp36l3    | zinc finger protein 36, C3H type-like 3       | 1.51E-01 | NS | 2.26E-02 | 1.2 | 3.55E-01 | NS  |
| A_64_P100023  | XM_001072887 | 690005 | Zcchc3     | zinc finger, CCHC domain containing 3         | 6.59E-01 | NS | 1.67E-02 | 1.2 | 5.54E-01 | NS  |
| A_44_P165938  | NM_001025125 | 360800 | Sumf2      | sulfatase modifying factor 2                  | 1.61E-01 | NS | 4.29E-03 | 1.2 | 7.99E-01 | NS  |
| A_64_P246679  | NM_001007678 | 304807 | Hibf       | RAB interacting factor                        | 9.63E-01 | NS | 2.00E-02 | 1.2 | 8.99E-02 | NS  |
| A_44_P1043208 | NM_001108174 | 315871 | Snx14      | sorting nexin 14                              | 1.72E-01 | NS | 5.00E-02 | 1.2 | 1.63E-01 | NS  |
|               |              |        |            | similar to DnaJ (Hsp40) homolog, subfamily    |          |    |          |     |          |     |
| A_44_P126613  | NM_001109541 | 689593 | LOC689593  | B, member 10 isoform 2                        | 1.44E-01 | NS | 2.72E-02 | 1.2 | 3.78E-01 | NS  |
| A_44_P262994  | NM_001108167 | 315820 | Myo5c      | myosin VC                                     | 9.55E-01 | NS | 3.21E-02 | 1.2 | 6.48E-01 | NS  |
| A_42_P658562  | NM_001134416 | 290679 | Ints10     | integrator complex subunit 10                 | 1.54E-01 | NS | 6.25E-03 | 1.2 | 6.42E-02 | NS  |
| A_43_P15805   | AB015645     | 252859 | Trhr2      | thyrotropin releasing hormone receptor 2      | 4.98E-01 | NS | 4.95E-02 | 1.2 | 2.43E-01 | NS  |
| A_44_P456968  | NM_001107547 | 308944 | St5        | suppression of tumorigenicity 5               | 2.18E-01 | NS | 4.71E-02 | 1.2 | 8.61E-01 | NS  |
|               |              |        |            | nucleotide-binding oligomerization domain     |          |    |          |     |          |     |
|               |              |        |            | containing 1                                  | 6.15E-01 | NS | 1.13E-02 | 1.2 | 4.31E-01 | NS  |
| A_64_P084188  | NM_001109236 | 500133 | Nod1       | tripartite motif-containing 37                | 7.21E-01 | NS | 6.27E-03 | 1.2 | 3.63E-01 | NS  |
| A_44_P133650  | NM_001108288 | 360592 | Trim37     | similar to hypothetical protein               |          |    |          |     |          |     |
| A_64_P151679  | XM_001077456 | 366005 | RGD1562874 | DKFZp434E1818.1 - human (fragment)            | 8.73E-02 | NS | 2.32E-02 | 1.2 | 5.02E-02 | NS  |
| A_64_P029242  | NM_001106498 | 296078 | Pak6       | p21 protein (Cdc42/Rac)-activated kinase 6    | 8.90E-01 | NS | 2.45E-02 | 1.2 | 9.36E-01 | NS  |
|               |              |        |            | similar to Adaptor-related protein complex    |          |    |          |     |          |     |
| A_44_P258674  | NM_001108996 | 367038 | RGD1561490 | 1, mu 2 subunit (AP1M2)                       | 6.02E-02 | NS | 1.57E-02 | 1.2 | 2.52E-01 | NS  |
| A_64_P150047  | NM_001109535 | 689377 | Rab20      | RAB20, member RAS oncogene family             | 7.67E-02 | NS | 1.20E-02 | 1.2 | 7.70E-01 | NS  |
| A_43_P10754   | NM_001107789 | 311545 | H13        | histocompatibility 13                         | 5.25E-01 | NS | 1.44E-02 | 1.2 | 9.51E-01 | NS  |
| A_42_P523070  | NM_001039019 | 303575 | Kif18b     | kinesin family member 18B                     | 5.25E-02 | NS | 5.92E-03 | 1.2 | 3.27E-01 | NS  |
|               |              |        |            | SEC22 vesicle trafficking protein homolog A   |          |    |          |     |          |     |
|               |              |        |            | (S. cerevisiae)                               | 3.05E-01 | NS | 1.86E-02 | 1.2 | 7.31E-01 | NS  |
| A_43_P13046   | NM_057147    | 117513 | Sec22a     |                                               | 2.26E-01 | NS | 5.58E-03 | 1.2 | 4.83E-01 | NS  |
| A_64_P061589  | XM_242940    |        |            |                                               | 4.09E-01 | NS | 3.02E-02 | 1.2 | 8.30E-01 | NS  |
| A_44_P433721  | NM_001014004 | 306586 | Amt        | aminomethyltransferase                        |          |    |          |     |          |     |
|               |              |        |            | achalasia, adrenocortical insufficiency,      | 4.92E-01 | NS | 2.11E-02 | 1.2 | 9.22E-03 | 1.7 |
| A_42_P643574  | NM_001106795 | 300259 | Aaas       | alacrimia (Allgrove, triple-A)                | 2.16E-01 | NS | 8.82E-03 | 1.2 | 3.44E-01 | NS  |
| A_42_P658552  | NM_053783    | 116465 | lfng1      | interferon gamma receptor 1                   |          |    |          |     |          |     |
|               |              |        |            | similar to high mobility group nucleosomal    | 2.49E-01 | NS | 2.36E-02 | 1.2 | 9.09E-01 | NS  |
| A_64_P091460  | XM_001079135 | 691642 | LOC691642  | binding domain 1                              | 3.26E-01 | NS | 2.45E-02 | 1.2 | 2.39E-01 | NS  |
| A_42_P634156  | FQ220776     |        |            |                                               | 4.28E-01 | NS | 3.93E-02 | 1.2 | 3.56E-01 | NS  |
| A_44_P482346  | NM_017318    | 50646  | Ptk2b      | PTK2B protein tyrosine kinase 2 beta          |          |    |          |     |          |     |
|               |              |        |            | solute carrier family 31 (copper              | 1.46E-01 | NS | 3.94E-02 | 1.2 | 6.48E-02 | NS  |
|               |              |        |            | transporters), member 2                       | 1.20E-01 | NS | 7.70E-03 | 1.2 | 1.77E-01 | NS  |
| A_44_P222726  | NM_001033693 | 298091 | Slc31a2    |                                               | 1.51E-01 | NS | 1.31E-02 | 1.2 | 6.90E-01 | NS  |
| A_64_P015558  | XM_235966    |        |            |                                               | 2.30E-01 | NS | 2.47E-02 | 1.2 | 6.71E-01 | NS  |
| A_44_P544063  | NM_001012007 | 303090 | Irgm       | immunity-related GTPase family, M             | 2.27E-01 | NS | 8.40E-03 | 1.2 | 4.85E-02 | 1.9 |
| A_64_P008047  | NM_001033670 | 24888  | Bcl2l1     | Bcl2-like 1                                   | 6.82E-02 | NS | 9.26E-03 | 1.2 | 8.13E-01 | NS  |
| A_64_P147504  | XM_001075318 | 362737 | Heatr5a    | HEAT repeat containing 5A                     | 9.03E-01 | NS | 4.97E-02 | 1.2 | 2.32E-01 | NS  |
| A_64_P162665  | NM_001025668 | 304928 | RGD1306783 | similar to 2810422O20Rik protein              | 4.90E-01 | NS | 7.30E-03 | 1.2 | 7.48E-01 | NS  |
| A_44_P1039634 | NM_001108924 | 365387 | Odf3       | outer dense fiber of sperm tails 3            | 4.63E-01 | NS | 4.42E-02 | 1.2 | 7.01E-01 | NS  |
| A_44_P489273  | NM_001001518 | 408199 | Sucnr1     | succinate receptor 1                          |          |    |          |     |          |     |
| A_43_P21414   | NM_001109505 | 688555 | Atg10      | autophagy-related 10 (S. cerevisiae)          | 4.91E-01 | NS | 4.96E-02 | 1.2 | 8.99E-01 | NS  |
|               |              |        |            | pleckstrin homology domain containing,        | 2.22E-01 | NS | 4.50E-02 | 1.2 | 8.82E-02 | NS  |
|               |              |        |            | family F (with FYVE domain) member 2          |          |    |          |     |          |     |
| A_64_P000859  | NM_001108655 | 362484 | Plekhh2    | Niemann-Pick disease, type C2                 | 2.09E-01 | NS | 1.46E-02 | 1.2 | 1.83E-01 | NS  |
| A_44_P139742  | NM_173118    | 286898 | Npc2       | ubiquitin specific peptidase 5 (isopeptidase  |          |    |          |     |          |     |
|               |              |        |            | T)                                            |          |    |          |     |          |     |
| A_44_P466608  | NM_001106619 | 297593 | Usp5       | asparagine-linked glycosylation 12            |          |    |          |     |          |     |
|               |              |        |            | homolog (yeast, alpha-1,6-                    | 9.59E-01 | NS | 1.84E-02 | 1.2 | 5.64E-01 | NS  |
|               |              |        |            | mannosyltransferase)                          | 1.90E-01 | NS | 2.39E-02 | 1.2 | 9.36E-01 | NS  |
| A_43_P21419   | NM_001108104 | 315212 | Alg12      | erythrocyte protein band 4.1-like 5           |          |    |          |     |          |     |
| A_64_P014371  | NM_001012023 | 304733 | Epb4.115   | GA binding protein transcription factor, beta | 3.47E-01 | NS | 4.05E-02 | 1.2 | 7.06E-02 | NS  |
|               |              |        |            | subunit 2                                     |          |    |          |     |          |     |
| A_64_P137056  | XM_001055604 | 295263 | Gabpb2     | phosphatidylinositol glycan anchor            |          |    |          |     |          |     |
|               |              |        |            | biosynthesis, class O                         | 2.07E-01 | NS | 1.41E-02 | 1.2 | 7.96E-01 | NS  |
| A_64_P010788  | XM_001069442 | 313341 | Pigo       |                                               | 3.85E-01 | NS | 2.93E-02 | 1.2 | 9.93E-01 | NS  |
| A_64_P156198  | NM_001001361 | 288808 | Olr903     | olfactory receptor 903                        |          |    |          |     |          |     |

|               |               |        |            |                                                                                                                                             |          |    |          |     |          |      |
|---------------|---------------|--------|------------|---------------------------------------------------------------------------------------------------------------------------------------------|----------|----|----------|-----|----------|------|
| A_44_P105163  | NM_001143858  | 309081 | Dock1      | dedicator of cyto-kinesis 1                                                                                                                 | 9.51E-02 | NS | 4.39E-02 | 1.2 | 3.30E-01 | NS   |
| A_64_P052096  | XM_001069739  | 689147 | LOC689147  | hypothetical protein LOC689147                                                                                                              | 2.55E-01 | NS | 4.87E-02 | 1.2 | 9.33E-01 | NS   |
| A_64_P135112  | XM_001077978  |        |            |                                                                                                                                             | 4.72E-01 | NS | 2.32E-02 | 1.2 | 9.56E-01 | NS   |
| A_42_P709423  | NM_001012135  | 316620 | Mlph       | melanophilin                                                                                                                                | 6.03E-01 | NS | 1.53E-02 | 1.2 | 1.20E-01 | NS   |
| A_44_P395538  | NM_030585     | 80754  | Rabep2     | rabaptin, RAB GTPase binding effector protein 2                                                                                             | 8.14E-02 | NS | 1.60E-02 | 1.2 | 4.02E-02 | -1.6 |
| A_64_P058937  | NM_001106421  | 294900 | Tpd52      | tumor protein D52                                                                                                                           | 8.54E-01 | NS | 4.63E-02 | 1.2 | 7.64E-01 | NS   |
| A_64_P109643  | NM_001013238  | 365548 | Pttg1ip    | pituitary tumor-transforming 1 interacting protein                                                                                          | 2.39E-01 | NS | 4.08E-02 | 1.2 | 7.10E-01 | NS   |
| A_44_P401858  | NM_057212     | 117582 | Tmem158    | transmembrane protein 158                                                                                                                   | 2.04E-01 | NS | 9.84E-03 | 1.2 | 1.84E-01 | NS   |
| A_44_P461551  | NM_001011902  | 288585 | Rab15      | RAB, member RAS oncogene family-like 5                                                                                                      | 1.34E-01 | NS | 3.75E-02 | 1.2 | 1.30E-01 | NS   |
| A_64_P130922  | XR_008816     | 297823 | RGD1310592 | similar to RIKEN cDNA 2810013E07                                                                                                            | 1.04E-01 | NS | 3.19E-02 | 1.2 | 3.20E-01 | NS   |
| A_42_P701582  | NM_053293     | 25260  | Gstt1      | glutathione S-transferase theta 1                                                                                                           | 8.62E-02 | NS | 2.79E-02 | 1.2 | 1.05E-01 | NS   |
| A_44_P578654  | NM_001024326  | 500088 | Rab19      | RAB19, member RAS oncogene family                                                                                                           | 1.31E-01 | NS | 1.80E-02 | 1.2 | 1.46E-01 | NS   |
| A_64_P162560  | XM_216557     | 298594 | Rcc2       | regulator of chromosome condensation 2                                                                                                      | 1.27E-01 | NS | 2.40E-02 | 1.2 | 1.29E-01 | NS   |
| A_64_P099724  | XM_342228     | 361929 | Atp11b     | ATPase, class VI, type 11B                                                                                                                  | 1.36E-01 | NS | 3.43E-02 | 1.2 | 1.96E-01 | NS   |
| A_64_P010653  | NM_001013126  | 304805 | Cyb5r1     | cytochrome b5 reductase 1                                                                                                                   | 5.79E-01 | NS | 3.91E-02 | 1.2 | 6.99E-01 | NS   |
| A_44_P409797  | NM_031729     | 65179  | Ppp5c      | protein phosphatase 5, catalytic subunit                                                                                                    | 1.40E-01 | NS | 2.97E-03 | 1.3 | 8.34E-02 | NS   |
| A_44_P420503  | NM_001008872  | 408229 | Slp1i2     | antileukoproteinase-like 2                                                                                                                  | 7.65E-01 | NS | 3.78E-02 | 1.3 | 2.58E-01 | NS   |
| A_44_P791108  | NM_001014070  | 313672 | LOC313672  | kazrin                                                                                                                                      | 6.60E-01 | NS | 3.53E-02 | 1.3 | 2.94E-01 | NS   |
| A_64_P108210  | XM_001053570  | 679578 | LOC679578  | similar to Protein C18orf1                                                                                                                  | 6.36E-02 | NS | 1.01E-02 | 1.3 | 2.04E-01 | NS   |
| A_44_P253479  | NM_001007672  | 303356 | Tmem98     | transmembrane protein 98                                                                                                                    | 9.73E-01 | NS | 1.30E-02 | 1.3 | 1.05E-01 | NS   |
| A_44_P408165  | NM_001024992  | 303332 | Tmem199    | transmembrane protein 199                                                                                                                   | 9.55E-01 | NS | 8.18E-03 | 1.3 | 9.64E-02 | NS   |
| A_44_P143472  | XM_001065923  | 362438 | Ncapd2     | non-SMC condensin I complex, subunit D2<br>BRF1 homolog, subunit of RNA polymerase III transcription initiation factor IIIB (S. cerevisiae) | 3.79E-01 | NS | 3.43E-02 | 1.3 | 5.84E-02 | NS   |
| A_42_P742797  | NM_001106761  | 299347 | Brf1       |                                                                                                                                             | 6.20E-02 | NS | 7.18E-03 | 1.3 | 1.40E-01 | NS   |
| A_42_P493925  | NM_198785     | 362636 | Usp48      | ubiquitin specific peptidase 48                                                                                                             | 1.32E-01 | NS | 4.09E-02 | 1.3 | 5.84E-01 | NS   |
| A_42_P777268  | XM_001072925  | 315409 | RGD1563556 | similar to mKIAA1377 protein                                                                                                                | 1.34E-01 | NS | 3.58E-02 | 1.3 | 1.59E-01 | NS   |
| A_42_P742084  | NM_001010965  | 362787 | Rage       | renal tumor antigen                                                                                                                         | 1.39E-01 | NS | 6.63E-03 | 1.3 | 4.73E-01 | NS   |
| A_44_P1029892 | NM_001108790  | 363206 | Tmem14a    | transmembrane protein 14A                                                                                                                   | 8.55E-02 | NS | 1.87E-02 | 1.3 | 8.09E-02 | NS   |
| A_42_P544601  | NM_012515     | 24230  | Tspo       | translocator protein                                                                                                                        | 1.25E-01 | NS | 3.52E-02 | 1.3 | 1.53E-02 | -1.6 |
| A_64_P062288  | NM_001034138  | 303037 | Ccdc99     | coiled-coil domain containing 99                                                                                                            | 5.21E-02 | NS | 2.12E-02 | 1.3 | 6.62E-01 | NS   |
| A_44_P306602  | NM_012591     | 24508  | Irf1       | interferon regulatory factor 1<br>LSM5 homolog, U6 small nuclear RNA associated (S. cerevisiae)                                             | 2.36E-01 | NS | 1.31E-02 | 1.3 | 1.18E-01 | NS   |
| A_64_P008947  | NM_001107289  | 306222 | Lsm5       |                                                                                                                                             | 2.23E-01 | NS | 4.58E-02 | 1.3 | 8.75E-01 | NS   |
| A_44_P352113  | NM_001108751  | 363001 | Bcdin3d    | BCDIN3 domain containing                                                                                                                    | 7.18E-01 | NS | 6.42E-03 | 1.3 | 6.96E-01 | NS   |
| A_64_P054735  | NM_001033670  | 24888  | Bcl2l1     | Bcl2-like 1                                                                                                                                 | 2.39E-01 | NS | 1.44E-02 | 1.3 | 9.95E-01 | NS   |
| A_64_P081078  | NM_138904     | 192268 | Gls2       | glutaminase 2 (liver, mitochondrial)                                                                                                        | 1.27E-01 | NS | 1.15E-02 | 1.3 | 2.75E-02 | -2.1 |
| A_44_P928419  | XM_002726504  |        |            |                                                                                                                                             | 3.11E-01 | NS | 3.59E-02 | 1.3 | 1.29E-01 | NS   |
| A_42_P744033  | NM_001100846  | 309255 | Mtmr10     | myotubularin related protein 10<br>phosphatidic acid phosphatase type 2 domain containing 1B                                                | 3.82E-01 | NS | 9.76E-04 | 1.3 | 3.99E-01 | NS   |
| A_44_P457099  | NM_001109411  | 680466 | Ppapdc1b   | ATPase, Na+/K+ transporting, beta 1 polypeptide                                                                                             | 8.51E-02 | NS | 1.65E-02 | 1.3 | 8.81E-01 | NS   |
| A_44_P435604  | NM_013113     | 25650  | Atp1b1     |                                                                                                                                             | 6.58E-02 | NS | 2.35E-02 | 1.3 | 9.39E-02 | NS   |
| A_64_P118762  | NM_030870     | 81528  | Ogg1       | 8-oxoguanine DNA glycosylase                                                                                                                | 8.97E-01 | NS | 2.22E-02 | 1.3 | 2.53E-01 | NS   |
| A_44_P532352  | NM_0011127555 | 363520 | Irak1      | interleukin-1 receptor-associated kinase 1                                                                                                  | 6.69E-01 | NS | 1.27E-02 | 1.3 | 5.07E-01 | NS   |
| A_44_P1040503 | AF040261      | 29510  | Pctp       | phosphatidylcholine transfer protein                                                                                                        | 8.38E-02 | NS | 2.06E-02 | 1.3 | 3.25E-01 | NS   |
| A_44_P452936  | BC168919      |        |            |                                                                                                                                             | 8.26E-01 | NS | 3.45E-03 | 1.3 | 4.86E-02 | 1.4  |
| A_43_P10466   | NM_001025689  | 311078 | Psm14      | proteasome (prosome, macropain) 26S subunit, non-ATPase, 14                                                                                 | 7.30E-02 | NS | 8.98E-03 | 1.3 | 7.51E-02 | NS   |
| A_64_P154104  | NM_001108524  | 361755 | Aldh18a1   | aldehyde dehydrogenase 18 family, member A1<br>Cas-Br-M (murine) ecotropic retroviral transforming sequence c                               | 1.64E-01 | NS | 2.41E-02 | 1.3 | 5.09E-01 | NS   |
| A_44_P456923  | NM_001034920  | 292699 | Cblc       |                                                                                                                                             | 9.35E-01 | NS | 2.73E-02 | 1.3 | 2.15E-01 | NS   |
| A_44_P163242  | NM_138541     | 171577 | Epcam      | epithelial cell adhesion molecule                                                                                                           | 2.11E-01 | NS | 3.19E-02 | 1.3 | 1.98E-01 | NS   |
| A_44_P151744  | NM_001134763  | 81917  | Hip1r      | huntingtin interacting protein 1 related                                                                                                    | 2.71E-01 | NS | 1.41E-02 | 1.3 | 2.66E-01 | NS   |
| A_64_P041507  | NM_001105973  | 289237 | Slamf8     | SLAM family member 8                                                                                                                        | 4.23E-01 | NS | 2.54E-02 | 1.3 | 2.56E-01 | NS   |
| A_64_P148693  | XR_008819     |        |            |                                                                                                                                             | 6.46E-02 | NS | 9.10E-03 | 1.3 | 9.68E-01 | NS   |
| A_64_P073378  | NM_001025287  | 363076 | Tipin      | timeless interacting protein                                                                                                                | 1.01E-01 | NS | 3.41E-02 | 1.3 | 7.19E-01 | NS   |

|               |              |           |              |                                                                                                      |          |    |          |     |          |     |
|---------------|--------------|-----------|--------------|------------------------------------------------------------------------------------------------------|----------|----|----------|-----|----------|-----|
| A_43_P19155   | XM_002729506 | 313382    | Inadl        | InaD-like (Drosophila)                                                                               | 5.93E-01 | NS | 9.67E-03 | 1.3 | 4.59E-01 | NS  |
| A_43_P12529   | NM_031126    | 81804     | Stxbp2       | syntaxin binding protein 2                                                                           | 9.16E-01 | NS | 1.18E-02 | 1.3 | 9.65E-01 | NS  |
| A_64_P160947  | XM_001075705 | 686781    | LOC686781    | similar to NFKB interacting protein 1 eukaryotic translation initiation factor 2B, subunit 3 gamma   | 8.02E-02 | NS | 4.89E-02 | 1.3 | 1.41E-01 | NS  |
| A_44_P337088  | NM_133609    | 171145    | Eif2b3       | subunit 3 gamma                                                                                      | 1.79E-01 | NS | 4.00E-02 | 1.3 | 5.80E-02 | NS  |
| A_64_P019465  | XM_001081058 | 299824    | Tbc1d30      | TBC1 domain family, member 30                                                                        | 2.80E-01 | NS | 1.37E-02 | 1.3 | 5.45E-01 | NS  |
| A_64_P146298  | NM_001109535 | 689377    | Rab20        | RAB20, member RAS oncogene family                                                                    | 1.62E-01 | NS | 2.05E-02 | 1.3 | 1.28E-01 | NS  |
| A_44_P168184  | NM_001166675 | 751812    | Rasl2-9      | RAS-like, family 2, locus 9                                                                          | 7.48E-01 | NS | 2.42E-02 | 1.3 | 8.03E-02 | NS  |
| A_64_P037963  | NM_001044270 | 500929    | Tuba1b       | tubulin, alpha 1B                                                                                    | 6.52E-02 | NS | 2.37E-02 | 1.3 | 5.87E-01 | NS  |
| A_64_P061464  | NM_001106574 | 296733    | RGD1306404   | similar to mKIAA1402 protein                                                                         | 2.42E-01 | NS | 5.88E-03 | 1.3 | 1.00E+00 | NS  |
| A_42_P554066  | NM_001044243 | 311468    | Tasp1        | taspase, threonine aspartase 1                                                                       | 3.47E-01 | NS | 5.03E-03 | 1.3 | 8.41E-01 | NS  |
| A_44_P643325  | NM_001108753 | 363009    | Uhrf1bp1l    | UHRF1 binding protein 1-like                                                                         | 2.01E-01 | NS | 2.82E-02 | 1.3 | 4.94E-01 | NS  |
| A_44_P159305  | XM_001055962 | 313111    | Klh32        | kelch-like 32 (Drosophila)                                                                           | 2.64E-01 | NS | 2.58E-02 | 1.3 | 7.98E-02 | NS  |
| A_64_P014723  | NM_024351    | 24468     | Hspa8        | heat shock protein A8                                                                                | 3.19E-01 | NS | 1.93E-02 | 1.3 | 6.22E-02 | NS  |
| A_43_P18366   | NM_001039197 | 311854    | Tor1b        | torsin family 1, member B                                                                            | 1.23E-01 | NS | 2.52E-03 | 1.3 | 9.17E-01 | NS  |
| A_44_P450471  | NM_001130566 | 362944    | Ppp1r16a     | protein phosphatase 1, regulatory (inhibitor) subunit 16A                                            | 2.78E-01 | NS | 1.85E-02 | 1.3 | 6.81E-01 | NS  |
| A_43_P16393   | NM_020305    | 57022     | Adam4        | a disintegrin and metalloprotease domain 4 phosphatidylinositol-5-phosphate 4-kinase, type II, gamma | 3.51E-01 | NS | 6.14E-03 | 1.3 | 2.73E-01 | NS  |
| A_64_P136667  | NM_080480    | 140607    | Pip4k2c      | guanine nucleotide binding protein (G protein), beta 5                                               | 9.15E-01 | NS | 1.77E-03 | 1.3 | 5.14E-01 | NS  |
| A_44_P233569  | NM_031770    | 83579     | Gnb5         | HEAT repeat containing 1                                                                             | 4.98E-01 | NS | 3.18E-02 | 1.3 | 2.51E-01 | NS  |
| A_44_P288481  | NM_001108418 | 361262    | Heatr1       | Bardet-Biedl syndrome 1                                                                              | 2.86E-01 | NS | 1.66E-02 | 1.3 | 2.10E-01 | NS  |
| A_64_P102423  | NM_001107569 | 309156    | Bbs1         | similar to chromosome 1 open reading frame 172                                                       | 2.26E-01 | NS | 2.25E-02 | 1.3 | 2.37E-01 | NS  |
| A_64_P125725  | XR_085819    |           |              | similar to squamous cell carcinoma antigen recognized by T-cells 1                                   | 1.83E-01 | NS | 3.05E-02 | 1.3 | 1.13E-01 | NS  |
| A_64_P164864  | NM_001004268 | 313018    | RGD1303271   | similar to HMG-box transcription factor TCF-3                                                        | 8.11E-02 | NS | 4.88E-03 | 1.3 | 7.09E-02 | NS  |
| A_64_P016163  |              | 367036    | LOC367036    | death-associated protein kinase 3                                                                    | 2.59E-01 | NS | 4.39E-03 | 1.3 | 2.03E-01 | NS  |
| A_64_P059317  | XM_001057268 | 680457    | LOC680457    |                                                                                                      | 3.66E-01 | NS | 3.23E-02 | 1.3 | 1.15E-01 | NS  |
| A_42_P834176  | NM_022546    | 64391     | Dapk3        |                                                                                                      | 1.85E-01 | NS | 8.08E-03 | 1.3 | 2.60E-01 | NS  |
| A_44_P354255  | XM_214168    |           |              |                                                                                                      | 7.95E-02 | NS | 2.20E-02 | 1.3 | 1.58E-01 | NS  |
| A_64_P162940  | XM_001073994 |           |              |                                                                                                      | 9.92E-01 | NS | 3.99E-02 | 1.3 | 8.34E-01 | NS  |
| A_43_P16541   | NM_001106680 | 298443    | Toe1         | target of EGR1, member 1 (nuclear)                                                                   | 1.53E-01 | NS | 4.52E-02 | 1.3 | 3.22E-02 | 1.9 |
| A_64_P089863  | XM_243980    |           |              |                                                                                                      | 1.21E-01 | NS | 3.43E-03 | 1.3 | 1.06E-01 | NS  |
| A_64_P012982  | NM_001108668 | 362530    | Akna         | AT-hook transcription factor                                                                         | 3.41E-01 | NS | 4.58E-03 | 1.3 | 2.01E-01 | NS  |
| A_64_P014115  | NM_001108987 | 366826    | Diras1       | DIRAS family, GTP-binding RAS-like 1                                                                 | 2.08E-01 | NS | 1.28E-02 | 1.3 | 3.02E-01 | NS  |
| A_44_P667069  | NM_001109434 | 681023    | Qsox2        | quiescin Q6 sulfhydryl oxidase 2                                                                     | 5.87E-02 | NS | 2.44E-02 | 1.3 | 1.54E-01 | NS  |
| A_44_P493005  | NM_022858    | 64826     | Foxq1        | forkhead box Q1                                                                                      | 1.94E-01 | NS | 4.36E-03 | 1.3 | 9.32E-01 | NS  |
| A_44_P274397  | NM_001033700 | 310667    | Lass2        | LAG1 homolog, ceramide synthase 2                                                                    | 2.53E-01 | NS | 9.88E-03 | 1.3 | 5.14E-01 | NS  |
| A_44_P1040710 | XM_002729636 | 100361845 | LOC100361845 | hypothetical protein LOC100361845                                                                    | 3.01E-01 | NS | 4.27E-02 | 1.3 | 2.26E-01 | NS  |
| A_44_P483888  | XM_001060262 |           |              |                                                                                                      | 2.20E-01 | NS | 2.71E-02 | 1.3 | 9.13E-01 | NS  |
| A_64_P021606  | NM_001009482 | 494192    | Mycbpap      | Mycbp associated protein similar to LSM5 homolog, U6 small nuclear RNA associated                    | 1.84E-01 | NS | 3.34E-02 | 1.3 | 7.08E-02 | NS  |
| A_44_P557752  | XM_001054331 | 679753    | LOC679753    | Rap guanine nucleotide exchange factor (GEF) 3                                                       | 3.66E-01 | NS | 1.46E-02 | 1.3 | 8.58E-01 | NS  |
| A_43_P15424   | NM_021690    | 59326     | Rapgef3      | DENN/MADD domain containing 2D                                                                       | 5.91E-01 | NS | 5.55E-03 | 1.3 | 7.95E-01 | NS  |
| A_42_P465144  | NM_001107714 | 310772    | Dennd2d      | myosin Vb                                                                                            | 1.03E-01 | NS | 3.78E-02 | 1.3 | 1.60E-01 | NS  |
| A_44_P339558  | NM_017083    | 25132     | Myo5b        | CHK2 checkpoint homolog (S. pombe)                                                                   | 2.98E-01 | NS | 6.59E-03 | 1.3 | 4.67E-01 | NS  |
| A_42_P605265  | NM_053677    | 114212    | Chek2        | per1-like domain containing 1                                                                        | 8.42E-02 | NS | 8.30E-03 | 1.3 | 7.37E-01 | NS  |
| A_44_P761492  | NM_001143895 | 688174    | Per1d1       | centrosomal protein 135kDa                                                                           | 7.08E-02 | NS | 3.07E-03 | 1.3 | 5.98E-02 | NS  |
| A_44_P248162  | XM_001076228 | 305288    | Cep135       | interleukin enhancer binding factor 2                                                                | 1.34E-01 | NS | 1.61E-02 | 1.3 | 9.17E-02 | NS  |
| A_44_P419107  | NM_001047886 | 310612    | Ilf2         | solute carrier family 39 (zinc transporter), member 7                                                | 2.67E-01 | NS | 2.72E-02 | 1.3 | 4.68E-01 | NS  |
| A_44_P286215  | NM_001008885 | 294281    | Slc39a7      | cytochrome b-561                                                                                     | 2.19E-01 | NS | 2.02E-02 | 1.3 | 6.08E-01 | NS  |
| A_42_P612977  | NM_001107056 | 303601    | Cyb561       | zinc finger and BTB domain containing 6                                                              | 7.76E-02 | NS | 3.94E-03 | 1.3 | 9.04E-02 | NS  |
| A_64_P023990  | NM_001108953 | 366029    | Zbtb6        | syntaxin 3                                                                                           | 5.28E-02 | NS | 2.61E-02 | 1.3 | 6.35E-01 | NS  |
| A_64_P132916  | NM_031124    | 81802     | Stx3         |                                                                                                      | 8.87E-01 | NS | 8.11E-03 | 1.3 | 3.06E-01 | NS  |

|               |              |        |            |                                                                                                                                                         |          |    |          |     |          |      |
|---------------|--------------|--------|------------|---------------------------------------------------------------------------------------------------------------------------------------------------------|----------|----|----------|-----|----------|------|
| A_64_P103813  | XM_340974    |        |            |                                                                                                                                                         | 1.56E-01 | NS | 3.93E-02 | 1.3 | 7.63E-02 | NS   |
| A_44_P360496  | NM_199256    | 80843  | Sec61a1    | Sec61 alpha 1 subunit ( <i>S. cerevisiae</i> )                                                                                                          | 8.16E-01 | NS | 4.74E-02 | 1.3 | 1.89E-01 | NS   |
| A_44_P1003343 | NM_001014203 | 362994 | Ccdc65     | coiled-coil domain containing 65                                                                                                                        | 1.39E-01 | NS | 5.24E-03 | 1.3 | 2.23E-01 | NS   |
| A_44_P242938  | NM_144743    | 246252 | Ces6       | carboxylesterase 6                                                                                                                                      | 2.29E-01 | NS | 3.66E-02 | 1.3 | 5.82E-01 | NS   |
| A_43_P18735   | NM_001030030 | 298916 | Cpsf3      | cleavage and polyadenylation specificity factor 3                                                                                                       | 1.53E-01 | NS | 2.47E-03 | 1.3 | 2.56E-01 | NS   |
| A_44_P652265  | NM_001109248 | 500253 | Dnajb8     | DnaJ (Hsp40) homolog, subfamily B, member 8                                                                                                             | 1.97E-01 | NS | 3.92E-02 | 1.3 | 5.53E-02 | NS   |
| A_44_P276276  | AB049626     |        |            | family with sequence similarity 91, member A1                                                                                                           | 7.93E-01 | NS | 3.10E-02 | 1.3 | 3.03E-01 | NS   |
| A_44_P324066  | NM_001127578 | 689997 | Fam91a1    |                                                                                                                                                         | 5.42E-01 | NS | 1.45E-02 | 1.3 | 7.34E-01 | NS   |
| A_44_P443349  | NM_001014062 | 313163 | RGD1306195 | similar to RAN protein                                                                                                                                  | 8.83E-01 | NS | 3.70E-02 | 1.3 | 1.04E-01 | NS   |
| A_64_P069664  | NM_130427    | 156826 | Eya2       | eyes absent homolog 2 ( <i>Drosophila</i> )                                                                                                             | 8.24E-01 | NS | 1.59E-02 | 1.3 | 1.33E-01 | NS   |
| A_44_P231994  | NM_001107854 | 312255 | Slc37a3    | solute carrier family 37 (glycerol-3-phosphate transporter), member 3                                                                                   | 1.64E-01 | NS | 2.43E-02 | 1.3 | 2.59E-01 | NS   |
| A_64_P023466  | NM_001106720 | 298936 | Sntg2      | syntrophin, gamma 2                                                                                                                                     | 3.33E-01 | NS | 2.65E-02 | 1.3 | 2.60E-01 | NS   |
| A_44_P185102  | XM_342329    |        |            |                                                                                                                                                         | 1.23E-01 | NS | 3.73E-02 | 1.3 | 1.11E-02 | -1.3 |
| A_44_P309202  | NM_001014027 | 309111 | Slc25a22   | solute carrier family 25 (mitochondrial carrier, glutamate), member 22                                                                                  | 9.97E-02 | NS | 7.17E-03 | 1.3 | 2.95E-01 | NS   |
| A_44_P255954  | XM_001081684 | 498024 | Kctd2      | potassium channel tetramerisation domain containing 2                                                                                                   | 2.91E-01 | NS | 7.23E-03 | 1.3 | 1.62E-01 | NS   |
| A_64_P145766  | XR_085595    |        |            |                                                                                                                                                         | 8.90E-02 | NS | 1.61E-02 | 1.3 | 9.14E-01 | NS   |
| A_44_P477768  | NM_022267    | 64033  | Ccnd2      | cyclin D2                                                                                                                                               | 2.42E-01 | NS | 4.43E-02 | 1.3 | 2.27E-02 | -1.4 |
| A_64_P188326  | NM_053985    | 117056 | H3f3b      | H3 histone, family 3B                                                                                                                                   | 1.76E-01 | NS | 1.75E-02 | 1.3 | 1.79E-01 | NS   |
| A_44_P151582  | NM_001004091 | 362417 | Il17re     | interleukin 17 receptor E                                                                                                                               | 1.36E-01 | NS | 1.44E-02 | 1.3 | 6.19E-02 | NS   |
| A_43_P15565   | NM_023953    | 64357  | Cd200r1    | CD200 receptor 1                                                                                                                                        | 1.88E-01 | NS | 4.27E-02 | 1.3 | 5.58E-02 | NS   |
| A_44_P408108  | XR_086328    |        |            |                                                                                                                                                         | 4.76E-01 | NS | 1.70E-02 | 1.3 | 2.97E-01 | NS   |
| A_43_P22998   | NM_001108729 | 362818 | Silv       | silver homolog (mouse)                                                                                                                                  | 6.37E-01 | NS | 2.61E-02 | 1.3 | 3.31E-01 | NS   |
| A_64_P110881  | XM_342228    | 361929 | Atp11b     | ATPase, class VI, type 11B                                                                                                                              | 8.34E-02 | NS | 1.07E-02 | 1.3 | 6.53E-01 | NS   |
| A_44_P730677  | NM_001014072 | 313775 | RGD1311517 | similar to RIKEN cDNA 9430015G10                                                                                                                        | 9.20E-01 | NS | 2.02E-02 | 1.3 | 2.80E-02 | 2.0  |
| A_64_P141340  | NM_001107423 | 307810 | Esrp2      | epithelial splicing regulatory protein 2                                                                                                                | 4.36E-01 | NS | 1.93E-03 | 1.3 | 4.01E-01 | NS   |
| A_44_P147156  | NM_001005882 | 305340 | Rbm47      | RNA binding motif protein 47                                                                                                                            | 4.87E-01 | NS | 1.12E-03 | 1.3 | 5.57E-01 | NS   |
| A_64_P106503  | NM_173120    | 286900 | Sels       | selenoprotein S                                                                                                                                         | 6.23E-02 | NS | 1.97E-02 | 1.3 | 5.98E-01 | NS   |
| A_64_P051914  | NM_001106445 | 295245 | Rag1ap1    | recombination activating gene 1 activating protein 1                                                                                                    | 9.11E-02 | NS | 9.31E-03 | 1.3 | 2.15E-01 | NS   |
| A_64_P066544  | NM_173126    | 286910 | Nid67      | putative small membrane protein NID67                                                                                                                   | 1.47E-01 | NS | 4.85E-02 | 1.3 | 1.08E-01 | NS   |
| A_44_P301449  | NM_001029910 | 501083 | Pdcd6ip    | programmed cell death 6 interacting protein                                                                                                             | 3.63E-01 | NS | 1.50E-02 | 1.3 | 3.66E-01 | NS   |
| A_44_P506464  | XR_005489    |        |            |                                                                                                                                                         | 9.96E-01 | NS | 1.00E-02 | 1.3 | 8.47E-01 | NS   |
| A_44_P428507  | NM_199111    | 316241 | Nfkbie     | nuclear factor of kappa light polypeptide gene enhancer in B-cells inhibitor, epsilon signal transducing adaptor molecule (SH3 domain and ITAM motif) 1 | 2.38E-01 | NS | 2.07E-02 | 1.3 | 1.78E-01 | NS   |
| A_44_P128564  | NM_001109121 | 498798 | Stam       | proteasome (prosome, macropain) subunit, beta type 10                                                                                                   | 7.82E-02 | NS | 2.25E-02 | 1.3 | 6.41E-02 | NS   |
| A_44_P152144  | NM_001025637 | 291983 | Psmb10     | vacuolar protein sorting 16 homolog ( <i>S. cerevisiae</i> )                                                                                            | 5.83E-02 | NS | 1.25E-02 | 1.3 | 3.34E-01 | NS   |
| A_44_P101375  | NM_001005541 | 296159 | Vps16      | guanine nucleotide binding protein (G protein), gamma 7                                                                                                 | 2.66E-01 | NS | 1.69E-03 | 1.3 | 1.04E-01 | NS   |
| A_44_P235926  | NM_024138    | 58979  | Gng7       | transmembrane emp24 domain trafficking protein 2                                                                                                        | 9.78E-02 | NS | 1.24E-02 | 1.3 | 2.36E-01 | NS   |
| A_44_P214054  | NM_031722    | 65165  | Tmed2      |                                                                                                                                                         | 6.25E-01 | NS | 1.46E-02 | 1.3 | 9.65E-01 | NS   |
| A_64_P332826  | BF545663     |        |            |                                                                                                                                                         | 1.67E-01 | NS | 6.63E-03 | 1.3 | 1.02E-01 | NS   |
| A_43_P22795   | NM_001037204 | 360893 | Taf1a      | TATA box binding protein (Tbp)-associated factor, RNA polymerase I, A                                                                                   | 8.63E-01 | NS | 1.58E-02 | 1.3 | 1.78E-01 | NS   |
| A_44_P135730  | XR_008260    |        |            |                                                                                                                                                         | 4.74E-01 | NS | 1.86E-02 | 1.3 | 7.24E-02 | NS   |
| A_44_P455059  | NM_001014261 | 366473 | RGD1564776 | similar to ornithine decarboxylase-like protein                                                                                                         | 8.19E-01 | NS | 3.54E-02 | 1.3 | 7.69E-01 | NS   |
| A_64_P014254  | XR_008352    |        |            |                                                                                                                                                         | 1.86E-01 | NS | 1.70E-02 | 1.3 | 8.73E-02 | NS   |
| A_64_P137468  | NM_022261    | 64027  | Bspry      | B-box and SPRY domain containing                                                                                                                        | 9.75E-01 | NS | 2.44E-03 | 1.3 | 9.57E-01 | NS   |



|               |              |        |            |                                                                                                    |          |    |          |     |          |      |
|---------------|--------------|--------|------------|----------------------------------------------------------------------------------------------------|----------|----|----------|-----|----------|------|
| A_64_P011769  | XM_001074062 | 300768 | Coro2b     | coronin, actin binding protein, 2B<br>STT3, subunit of the<br>oligosaccharyltransferase complex,   | 1.81E-01 | NS | 2.01E-02 | 1.3 | 1.34E-01 | NS   |
| A_44_P214218  | NM_001134749 | 500972 | Stt3a      | homolog A ( <i>S. cerevisiae</i> )                                                                 | 1.29E-01 | NS | 9.68E-03 | 1.3 | 5.75E-02 | NS   |
| A_42_P773155  | NM_001106996 | 303073 | Cyfp2      | cytoplasmic FMR1 interacting protein 2                                                             | 8.79E-02 | NS | 2.76E-02 | 1.3 | 4.43E-01 | NS   |
| A_64_P140634  | XR_006181    |        |            |                                                                                                    | 8.90E-01 | NS | 4.43E-03 | 1.3 | 1.50E-01 | NS   |
| A_44_P160669  | NM_001012104 | 313648 | Ddost      | dolichyl-diphosphooligosaccharide-protein<br>glycosyltransferase                                   | 3.29E-01 | NS | 1.64E-03 | 1.3 | 4.80E-01 | NS   |
| A_64_P313669  | XM_224353    |        |            |                                                                                                    | 2.60E-01 | NS | 4.20E-02 | 1.3 | 8.00E-01 | NS   |
| A_44_P271923  | NM_001009690 | 309201 | Rom1       | retinal outer segment membrane protein 1                                                           | 3.15E-01 | NS | 9.50E-03 | 1.3 | 8.92E-01 | NS   |
| A_64_P155256  | NM_001170595 | 314480 | Gpr132     | G protein-coupled receptor 132                                                                     | 1.22E-01 | NS | 2.79E-02 | 1.3 | 3.95E-01 | NS   |
| A_44_P548726  | NM_001009664 | 299647 | Zfp414     | zinc finger protein 414                                                                            | 4.27E-01 | NS | 3.08E-02 | 1.3 | 3.20E-01 | NS   |
| A_42_P503768  | NM_001009466 | 362688 | Gemin6     | gem (nuclear organelle) associated protein<br>6                                                    | 9.31E-02 | NS | 2.26E-02 | 1.3 | 5.76E-01 | NS   |
| A_44_P520475  | NM_001013200 | 361999 | Anp32e     | acidic (leucine-rich) nuclear phosphoprotein<br>32 family, member E                                | 3.31E-01 | NS | 2.78E-02 | 1.3 | 6.99E-01 | NS   |
| A_44_P515107  | NM_019271    | 29734  | Hspa13     | 13                                                                                                 | 6.75E-02 | NS | 1.66E-02 | 1.3 | 7.01E-01 | NS   |
| A_64_P019798  | NM_001014037 | 310377 | RGD1306227 | similar to 4833420G17Rik protein<br>retinol dehydrogenase 11 (all-trans/9-cis/11-<br>cis)          | 1.52E-01 | NS | 4.75E-02 | 1.3 | 9.72E-01 | NS   |
| A_44_P434216  | NM_001012193 | 362757 | Rdh11      |                                                                                                    | 5.60E-01 | NS | 1.45E-02 | 1.3 | 5.38E-01 | NS   |
| A_43_P17622   | NM_001108993 | 366984 | Lass5      | LAG1 homolog, ceramide synthase 5<br>sortilin-related receptor, LDLR class A<br>repeats-containing | 4.77E-01 | NS | 1.22E-02 | 1.3 | 8.29E-01 | NS   |
| A_42_P552341  | NM_053519    | 300652 | Sort1      | SET domain and mariner transposase<br>fusion gene                                                  | 2.09E-01 | NS | 3.30E-03 | 1.3 | 5.43E-01 | NS   |
| A_43_P17786   | XM_001071895 | 500281 | Setmar     |                                                                                                    | 1.21E-01 | NS | 4.61E-03 | 1.3 | 7.45E-01 | NS   |
| A_64_P091851  | XR_006411    | 497848 | LOC497848  | hypothetical LOC497848                                                                             | 9.81E-01 | NS | 3.84E-02 | 1.3 | 2.12E-01 | NS   |
| A_64_P040900  | NM_001134857 | 304332 | Heatr2     | HEAT repeat containing 2                                                                           | 9.07E-01 | NS | 2.34E-02 | 1.3 | 6.60E-01 | NS   |
| A_64_P047281  | NM_001172305 | 25023  | Prkcb      | protein kinase C, beta                                                                             | 1.28E-01 | NS | 4.97E-03 | 1.3 | 5.34E-01 | NS   |
| A_44_P405790  | NM_001134710 | 685174 | Cnpy3      | canopy 3 homolog (zebrafish)                                                                       | 3.24E-01 | NS | 1.76E-02 | 1.3 | 5.27E-01 | NS   |
| A_44_P237153  | NM_022274    | 64041  | Birc5      | baculoviral IAP repeat-containing 5                                                                | 4.74E-01 | NS | 4.38E-02 | 1.3 | 3.36E-01 | NS   |
| A_44_P1024703 | NM_001007753 | 363137 | Cyb561d2   | cytochrome b-561 domain containing 2                                                               | 9.18E-02 | NS | 4.56E-02 | 1.3 | 6.44E-02 | NS   |
| A_44_P180060  | XM_001057931 | 84581  | Hdac6      | histone deacetylase 6                                                                              | 8.28E-02 | NS | 8.01E-03 | 1.3 | 5.62E-01 | NS   |
| A_44_P518500  | NM_001108112 | 315298 | Racgap1    | Rac GTPase-activating protein 1                                                                    | 6.28E-01 | NS | 4.05E-02 | 1.3 | 6.10E-02 | NS   |
| A_64_P096381  | NM_024351    | 24468  | Hspa8      | heat shock protein A8                                                                              | 4.75E-01 | NS | 6.33E-03 | 1.3 | 6.63E-02 | NS   |
| A_64_P007958  | XM_001054092 | 362322 | Slc25a13   | solute carrier family 25, member 13 (citrin)                                                       | 8.53E-01 | NS | 2.45E-03 | 1.3 | 1.78E-01 | NS   |
| A_44_P461505  | NM_080787    | 140866 | Dgka       | diacylglycerol kinase, alpha                                                                       | 1.44E-01 | NS | 1.88E-03 | 1.3 | 8.07E-01 | NS   |
| A_44_P383555  | NM_001017988 | 303566 | LOC303566  | E2F1-inducible gene                                                                                | 4.06E-01 | NS | 4.70E-02 | 1.3 | 6.54E-01 | NS   |
| A_64_P030534  | NM_001107566 | 309139 | Tpcn2      | two pore segment channel 2<br>ribosomal modification protein rimK-like<br>family member B          | 3.12E-01 | NS | 7.19E-03 | 1.3 | 3.22E-01 | NS   |
| A_43_P23187   | XM_002726478 | 362428 | Rimklb     |                                                                                                    | 5.53E-01 | NS | 1.14E-02 | 1.3 | 2.34E-02 | -1.9 |
| A_44_P1037892 | XM_342640    | 362322 | Slc25a13   | solute carrier family 25, member 13 (citrin)                                                       | 7.13E-02 | NS | 2.02E-02 | 1.3 | 7.73E-01 | NS   |
| A_64_P024798  | NM_001033997 | 296161 | Ubox5      | U-box domain containing 5                                                                          | 1.32E-01 | NS | 2.74E-03 | 1.3 | 1.96E-01 | NS   |
| A_64_P106909  | NM_001112713 | 59076  | Grk6       | G protein-coupled receptor kinase 6                                                                | 2.86E-01 | NS | 1.43E-02 | 1.3 | 7.93E-02 | NS   |
| A_44_P220305  | XR_005959    |        |            |                                                                                                    | 6.15E-01 | NS | 4.83E-02 | 1.3 | 7.27E-02 | NS   |
| A_44_P201178  | NM_133562    | 171088 | Inpp5j     | inositol polyphosphate-5-phosphatase J                                                             | 4.20E-01 | NS | 9.43E-03 | 1.3 | 5.56E-01 | NS   |
| A_64_P070581  | XM_002725731 |        |            |                                                                                                    | 3.06E-01 | NS | 2.64E-02 | 1.3 | 4.36E-01 | NS   |
| A_44_P142562  | NM_001007643 | 295701 | Tmx2       | thioredoxin-related transmembrane protein<br>2                                                     | 6.99E-01 | NS | 6.57E-03 | 1.3 | 3.04E-01 | NS   |
| A_64_P076466  | XM_001078563 | 361812 | Pnpla1     | patatin-like phospholipase domain<br>containing 1                                                  | 1.73E-01 | NS | 3.38E-02 | 1.3 | 9.37E-01 | NS   |
| A_43_P18343   | NM_001100519 | 293455 | Gga2       | golgi associated, gamma adaptin ear<br>containing, ARF binding protein 2                           | 7.32E-01 | NS | 2.56E-02 | 1.3 | 6.29E-01 | NS   |
| A_64_P104598  | NM_001024307 | 499732 | Lrriq3     | leucine-rich repeats and IQ motif containing<br>3                                                  | 1.18E-01 | NS | 2.00E-02 | 1.3 | 3.90E-02 | -1.6 |
| A_44_P163396  | NM_031714    | 65151  | Hrsp12     | heat-responsive protein 12                                                                         | 1.55E-01 | NS | 2.26E-02 | 1.3 | 6.13E-01 | NS   |
| A_64_P052972  | XR_009456    |        |            |                                                                                                    | 3.82E-01 | NS | 1.75E-02 | 1.3 | 5.33E-01 | NS   |
| A_64_P116989  | NM_001106956 | 302553 | Suv39h1    | suppressor of variegation 3-9 homolog 1<br>( <i>Drosophila</i> )                                   | 1.98E-01 | NS | 1.23E-02 | 1.3 | 7.47E-02 | NS   |

|               |              |        |            |                                                                                                                  |          |    |          |     |          |      |
|---------------|--------------|--------|------------|------------------------------------------------------------------------------------------------------------------|----------|----|----------|-----|----------|------|
| A_44_P357870  | NM_031559    | 25757  | Cpt1a      | carnitine palmitoyltransferase 1a, liver nucleus accumbens associated 1, BEN and                                 | 6.31E-01 | NS | 1.64E-02 | 1.3 | 6.21E-01 | NS   |
| A_64_P037196  | NM_134413    | 171454 | Nacc1      | BTB (POZ) domain containing                                                                                      | 3.98E-01 | NS | 3.52E-02 | 1.3 | 8.64E-01 | NS   |
| A_64_P089215  | XM_233422    | 313504 | Foxd2      | forkhead box D2                                                                                                  | 7.18E-01 | NS | 1.76E-02 | 1.3 | 2.20E-01 | NS   |
| A_64_P121021  | XR_086164    | 683212 | LOC683212  | similar to keratin complex 1, acidic, gene 18                                                                    | 1.78E-01 | NS | 2.01E-02 | 1.3 | 1.05E-01 | NS   |
| A_44_P191593  | NM_053946    | 116967 | Magt1      | magnesium transporter 1                                                                                          | 2.29E-01 | NS | 1.96E-03 | 1.3 | 6.93E-01 | NS   |
| A_44_P401083  | NM_001007664 | 300983 | Abhd14b    | abhydrolase domain containing 14b dynein cytoplasmic 2 light intermediate chain 1                                | 3.62E-01 | NS | 2.18E-02 | 1.3 | 5.29E-01 | NS   |
| A_43_P23209   | NM_001013940 | 298767 | Dync2li1   |                                                                                                                  | 2.37E-01 | NS | 9.34E-03 | 1.3 | 3.33E-01 | NS   |
| A_44_P421897  | XM_227056    |        |            |                                                                                                                  | 6.98E-02 | NS | 1.85E-02 | 1.3 | 7.57E-01 | NS   |
| A_44_P351898  | NM_001106594 | 297176 | Mad2l1     | MAD2 mitotic arrest deficient-like 1 (yeast)                                                                     | 5.16E-02 | NS | 6.60E-03 | 1.3 | 2.46E-01 | NS   |
| A_44_P100443  | NM_001013124 | 304577 | Ung        | uracil-DNA glycosylase                                                                                           | 3.14E-01 | NS | 1.18E-02 | 1.3 | 8.16E-01 | NS   |
| A_64_P136362  | NM_001108827 | 363611 | RGD1306000 | similar to CG8043-PA                                                                                             | 6.91E-01 | NS | 4.29E-02 | 1.3 | 7.85E-01 | NS   |
| A_64_P107684  | NM_001000769 | 405044 | Olr1460    | olfactory receptor 1460                                                                                          | 2.48E-01 | NS | 1.52E-02 | 1.3 | 1.61E-01 | NS   |
| A_64_P013157  | XM_001062653 | 289322 | RGD1564463 | similar to Mdes protein                                                                                          | 9.43E-02 | NS | 3.40E-02 | 1.3 | 7.52E-01 | NS   |
| A_44_P271720  | NM_022523    | 64315  | Cd151      | CD151 molecule (Raph blood group)                                                                                | 2.10E-01 | NS | 7.48E-03 | 1.3 | 7.80E-01 | NS   |
| A_64_P104481  | NM_001107016 | 303260 | Spag7      | sperm associated antigen 7                                                                                       | 9.02E-01 | NS | 1.35E-02 | 1.3 | 6.75E-01 | NS   |
| A_64_P150251  | NM_001024791 | 360605 | Epn3       | epsin 3                                                                                                          | 7.95E-01 | NS | 1.25E-02 | 1.3 | 2.12E-01 | NS   |
| A_64_P039601  | NM_153628    | 266758 | Sec11c     | SEC11 homolog C (S. cerevisiae)                                                                                  | 6.40E-02 | NS | 2.13E-02 | 1.3 | 3.73E-02 | -1.9 |
| A_43_P10861   | NM_001024879 | 301529 | Dnpep      | aspartyl aminopeptidase                                                                                          | 3.65E-01 | NS | 4.49E-03 | 1.3 | 4.78E-01 | NS   |
| A_64_P007618  | NM_053398    | 84422  | Gfra3      | GDNF family receptor alpha 3 ATP-binding cassette, sub-family A (ABC1), member 3                                 | 9.84E-02 | NS | 1.27E-02 | 1.3 | 1.49E-01 | NS   |
| A_43_P16685   | XM_220219    | 302973 | Abca3      |                                                                                                                  | 6.32E-01 | NS | 1.94E-02 | 1.3 | 5.09E-01 | NS   |
| A_44_P621931  | AY539922     |        |            |                                                                                                                  | 8.29E-01 | NS | 4.03E-02 | 1.3 | 9.44E-01 | NS   |
| A_44_P986792  | NM_053519    | 300652 | Sort1      | sortilin-related receptor, LDLR class A repeats-containing solute carrier family 48 (heme transporter), member 1 | 9.61E-01 | NS | 1.31E-02 | 1.3 | 9.12E-01 | NS   |
| A_44_P300183  | NM_001127456 | 300191 | Slc48a1    | member 1                                                                                                         | 9.79E-01 | NS | 4.67E-04 | 1.3 | 3.75E-01 | NS   |
| A_64_P048024  | XM_001074501 | 306594 | Mcph1      | microcephalin 1 family with sequence similarity 129, member B                                                    | 3.13E-01 | NS | 2.88E-02 | 1.3 | 5.00E-01 | NS   |
| A_44_P250673  | NM_001109885 | 362115 | Fam129b    | member B                                                                                                         | 2.42E-01 | NS | 3.85E-02 | 1.3 | 4.69E-01 | NS   |
| A_64_P018451  | XM_001058324 | 680678 | LOC680678  | similar to transcription factor 23                                                                               | 5.95E-01 | NS | 2.98E-02 | 1.3 | 8.87E-01 | NS   |
| A_44_P1057309 | NM_130822    | 170641 | Lphn3      | latrophilin 3 purinergic receptor P2X, ligand-gated ion channel 4                                                | 1.01E-01 | NS | 9.60E-03 | 1.3 | 1.91E-02 | -3.5 |
| A_44_P484909  | NM_031594    | 29659  | P2rx4      |                                                                                                                  | 9.68E-01 | NS | 4.39E-03 | 1.3 | 8.50E-01 | NS   |
| A_44_P212927  | XM_222593    |        |            |                                                                                                                  | 9.14E-01 | NS | 9.46E-03 | 1.3 | 2.02E-01 | NS   |
| A_64_P154786  | XM_001064036 | 363993 | Gpr25      | G protein-coupled receptor 25                                                                                    | 5.02E-01 | NS | 2.84E-02 | 1.3 | 1.16E-01 | NS   |
| A_64_P048461  | XM_236988    |        |            |                                                                                                                  | 7.04E-02 | NS | 3.64E-02 | 1.3 | 2.65E-01 | NS   |
| A_64_P068162  | NM_172325    | 282825 | Zfp161     | zinc finger protein 161 similar to chromosome 14 open reading frame 50                                           | 4.73E-01 | NS | 4.90E-02 | 1.3 | 3.80E-01 | NS   |
| A_44_P359040  | NM_001013944 | 299153 | RGD1309051 |                                                                                                                  | 4.19E-01 | NS | 2.93E-02 | 1.3 | 1.86E-01 | NS   |
| A_64_P315172  | NM_053854    | 116632 | Nat2       | N-Acetyltransferase-2 (arylamine N-acetyltransferase) family with sequence similarity 38, member A               | 1.03E-01 | NS | 4.25E-02 | 1.3 | 3.75E-01 | NS   |
| A_44_P499309  | NM_001077200 | 361430 | Fam38a     |                                                                                                                  | 2.04E-01 | NS | 2.12E-02 | 1.3 | 3.88E-01 | NS   |
| A_44_P1034209 | NM_001100841 | 305078 | Lamb3      | laminin, beta 3                                                                                                  | 1.59E-01 | NS | 8.12E-03 | 1.3 | 2.22E-03 | 1.9  |
| A_44_P294437  | NM_001012161 | 361255 | Tbce       | tubulin folding cofactor E                                                                                       | 6.57E-01 | NS | 5.62E-03 | 1.3 | 2.07E-01 | NS   |
| A_44_P185174  | XM_343561    |        |            |                                                                                                                  | 5.18E-01 | NS | 6.24E-03 | 1.3 | 3.14E-01 | NS   |
| A_64_P104688  | NM_001135749 | 499655 | Cks1b      | CDC28 protein kinase regulatory subunit 1B                                                                       | 2.47E-01 | NS | 3.09E-02 | 1.3 | 1.44E-01 | NS   |
| A_64_P044920  | NM_001107000 | 303130 | Fstl4      | folliculin-like 4                                                                                                | 2.19E-01 | NS | 4.12E-02 | 1.3 | 5.77E-01 | NS   |
| A_44_P698144  | XM_001059637 | 499071 | Ccdc106    | coiled-coil domain containing 106                                                                                | 7.92E-02 | NS | 4.98E-03 | 1.3 | 2.83E-01 | NS   |
| A_44_P513677  | XM_233515    |        |            |                                                                                                                  | 5.32E-01 | NS | 3.65E-03 | 1.3 | 1.15E-01 | NS   |
| A_44_P255201  | NM_144754    | 246272 | Cant1      | calcium activated nucleotidase 1 potassium voltage-gated channel, shaker-related subfamily, beta member 2        | 6.42E-01 | NS | 3.54E-02 | 1.3 | 8.82E-01 | NS   |
| A_43_P11906   | NM_017304    | 29738  | Kcnab2     | similar to high mobility group nucleosomal binding domain 1                                                      | 7.71E-01 | NS | 2.46E-02 | 1.3 | 1.56E-01 | NS   |
| A_64_P019590  | XM_001059675 | 680964 | LOC680964  |                                                                                                                  | 9.26E-01 | NS | 1.93E-02 | 1.3 | 5.96E-01 | NS   |

|               |              |           |              |                                                                    |          |    |          |     |          |      |
|---------------|--------------|-----------|--------------|--------------------------------------------------------------------|----------|----|----------|-----|----------|------|
| A_44_P239401  | NM_053972    | 117043    | RragB        | Ras-related GTP binding B                                          | 5.03E-01 | NS | 4.36E-02 | 1.3 | 4.57E-01 | NS   |
| A_64_P129137  | NM_057208    | 117557    | Tpm3         | tropomyosin 3, gamma                                               | 5.26E-02 | NS | 9.22E-03 | 1.3 | 3.47E-01 | NS   |
| A_44_P233618  | NM_053850    | 116599    | Blvra        | biliverdin reductase A                                             | 1.18E-01 | NS | 6.65E-03 | 1.3 | 1.74E-01 | NS   |
| A_44_P229842  | NM_001127606 | 100158225 | LOC100158225 | hypothetical protein LOC100158225                                  | 6.24E-01 | NS | 2.17E-02 | 1.3 | 1.87E-01 | NS   |
| A_64_P054251  | NM_053710    | 114502    | Pax3         | paired box 3                                                       | 4.70E-01 | NS | 4.35E-02 | 1.3 | 6.92E-01 | NS   |
| A_64_P145533  |              | 308846    | Uvrqg        | UV radiation resistance associated gene                            | 1.97E-01 | NS | 3.61E-03 | 1.3 | 3.88E-01 | NS   |
| A_64_P115506  | NM_053976    | 294853    | Krt18        | keratin 18                                                         | 6.67E-02 | NS | 1.64E-02 | 1.3 | 1.11E-01 | NS   |
| A_43_P16688   | NM_001024746 | 291852    | Katnb1       | katanin p80 (WD repeat containing) subunit B 1                     | 2.59E-01 | NS | 5.72E-03 | 1.3 | 2.79E-01 | NS   |
| A_44_P248358  | NM_001106166 | 291824    | Tk2          | thymidine kinase 2, mitochondrial                                  | 2.81E-01 | NS | 8.25E-03 | 1.3 | 5.28E-01 | NS   |
| A_44_P284067  | XM_235936    | 315473    | RGD1561444   | similar to RIKEN cDNA 9530077C05                                   | 7.55E-01 | NS | 2.11E-02 | 1.3 | 7.51E-01 | NS   |
| A_44_P395654  | NM_001000038 | 287520    | Olr1516      | olfactory receptor 1516                                            | 1.05E-01 | NS | 4.69E-02 | 1.3 | 1.40E-01 | NS   |
| A_44_P429321  | NM_001008377 | 362793    | RGD1307315   | LOC362793                                                          | 7.78E-01 | NS | 1.21E-02 | 1.3 | 7.47E-01 | NS   |
| A_64_P141510  | NM_001113754 | 680021    | Grhpr        | glyoxylate reductase/hydroxypyruvate reductase                     | 1.19E-01 | NS | 2.21E-02 | 1.3 | 1.96E-01 | NS   |
| A_44_P492173  | NM_001106417 | 294795    | Capsl        | calcyphosine-like                                                  | 2.76E-01 | NS | 1.57E-02 | 1.3 | 6.55E-02 | NS   |
| A_44_P166046  | NM_001039031 | 361730    | Dak          | dihydroxyacetone kinase 2 homolog (S. cerevisiae)                  | 4.09E-01 | NS | 5.73E-03 | 1.3 | 5.54E-01 | NS   |
| A_64_P146071  | NM_001108389 | 361088    | Rnf219       | ring finger protein 219                                            | 1.17E-01 | NS | 6.80E-03 | 1.3 | 5.04E-01 | NS   |
| A_44_P332041  | NM_022385    | 64187     | Arl1         | ADP-ribosylation factor-like 1                                     | 3.69E-01 | NS | 2.15E-02 | 1.3 | 5.14E-01 | NS   |
| A_64_P098334  | NM_001106671 | 298300    | Ttc22        | tetratricopeptide repeat domain 22                                 | 6.45E-02 | NS | 3.59E-02 | 1.3 | 9.20E-01 | NS   |
| A_44_P189065  | NM_001106442 | 295235    | Ssr2         | signal sequence receptor, beta                                     | 6.02E-02 | NS | 9.73E-03 | 1.3 | 5.90E-01 | NS   |
| A_64_P113493  | NM_021748    | 60355     | Nsf          | N-ethylmaleimide-sensitive factor                                  | 7.32E-01 | NS | 1.58E-02 | 1.3 | 7.25E-01 | NS   |
| A_44_P229816  | XM_001061491 |           |              |                                                                    | 7.61E-01 | NS | 1.36E-02 | 1.3 | 4.66E-01 | NS   |
| A_64_P086344  | XM_001080245 | 688083    | LOC688083    | similar to LRP16 protein                                           | 7.15E-02 | NS | 1.11E-02 | 1.3 | 3.33E-02 | -1.8 |
| A_64_P119002  | NM_017221    | 29499     | Shh          | sonic hedgehog                                                     | 1.18E-01 | NS | 1.38E-02 | 1.3 | 6.91E-01 | NS   |
| A_44_P667489  | NM_001109130 | 498944    | Tsnaxip1     | translin-associated factor X interacting protein 1                 | 2.94E-01 | NS | 3.76E-02 | 1.3 | 4.66E-01 | NS   |
| A_42_P823306  | NM_053411    | 84471     | Snx1         | sorting nexin 1                                                    | 1.20E-01 | NS | 1.46E-02 | 1.3 | 9.12E-01 | NS   |
| A_44_P360900  | NM_053409    | 84469     | Maged1       | melanoma antigen, family D, 1                                      | 3.60E-01 | NS | 8.09E-04 | 1.3 | 8.91E-01 | NS   |
| A_44_P283886  | NM_001106527 | 296280    | Tspyl3       | TSPY-like 3                                                        | 5.37E-01 | NS | 1.25E-02 | 1.3 | 8.95E-01 | NS   |
| A_44_P1042711 | NM_001108426 | 361308    | Kif20a       | kinesin family member 20A                                          | 9.90E-02 | NS | 1.24E-02 | 1.3 | 1.55E-01 | NS   |
| A_64_P036011  | NM_001042579 | 64830     | Unc13b       | unc-13 homolog B (C. elegans)                                      | 4.16E-01 | NS | 3.26E-02 | 1.3 | 3.03E-01 | NS   |
| A_43_P19630   | NM_001100789 | 498331    | Ptpn13       | protein tyrosine phosphatase, non-receptor type 13                 | 1.72E-01 | NS | 1.13E-02 | 1.3 | 2.36E-01 | NS   |
| A_44_P255771  | NM_001127572 | 688393    | LOC688393    | similar to XPA binding protein 1                                   | 6.20E-01 | NS | 1.24E-03 | 1.3 | 5.46E-01 | NS   |
| A_44_P433519  | XM_001077358 | 360793    | Rhbdd2       | rhomboid domain containing 2                                       | 7.68E-01 | NS | 6.60E-03 | 1.3 | 9.95E-01 | NS   |
| A_44_P655562  | NM_001014780 | 291653    | Pcdhb6       | protocadherin beta 6                                               | 8.81E-01 | NS | 1.22E-02 | 1.3 | 1.58E-01 | NS   |
| A_64_P163919  | XM_225460    | 366937    | RGD1566252   | similar to Ki-67                                                   | 1.25E-01 | NS | 3.58E-02 | 1.3 | 1.59E-01 | NS   |
| A_64_P098921  | NM_001007648 | 297594    | Cdca3        | cell division cycle associated 3                                   | 6.63E-02 | NS | 4.42E-02 | 1.3 | 3.28E-01 | NS   |
| A_44_P299830  | NM_001009707 | 361941    | RGD1359508   | similar to protein C33A12.3                                        | 6.96E-01 | NS | 9.53E-03 | 1.3 | 1.81E-01 | NS   |
| A_64_P028486  | NM_001107307 | 306356    | Cilp2        | cartilage intermediate layer protein 2                             | 9.91E-01 | NS | 2.06E-02 | 1.3 | 1.16E-01 | NS   |
| A_44_P196939  | XM_001080437 |           |              |                                                                    | 9.21E-02 | NS | 2.04E-02 | 1.3 | 8.78E-01 | NS   |
| A_43_P19260   | XM_001053368 |           |              |                                                                    | 5.55E-02 | NS | 3.35E-02 | 1.3 | 1.81E-01 | NS   |
| A_44_P442371  | NM_139261    | 246146    | Hspbp1       | HSPA (heat shock 70kDa) binding protein, cytoplasmic cochaperone 1 | 8.91E-01 | NS | 1.13E-03 | 1.3 | 2.62E-01 | NS   |
| A_64_P104553  | NM_031045    | 81677     | Itpka        | inositol 1,4,5-trisphosphate 3-kinase A                            | 5.32E-01 | NS | 1.67E-02 | 1.3 | 8.22E-01 | NS   |
| A_64_P075018  | NM_001134536 | 304458    | Tmem132b     | transmembrane protein 132B                                         | 3.99E-01 | NS | 4.17E-02 | 1.3 | 1.64E-01 | NS   |
| A_44_P348825  | NM_024150    | 79119     | Arf2         | ADP-ribosylation factor 2                                          | 9.99E-02 | NS | 1.61E-03 | 1.3 | 8.57E-01 | NS   |
| A_44_P324042  | NM_001034150 | 315548    | Srpr         | signal recognition particle receptor (docking protein)             | 2.06E-01 | NS | 3.19E-03 | 1.3 | 4.48E-01 | NS   |
| A_44_P942367  | NM_001012075 | 309828    | Tspyl4       | TSPY-like 4                                                        | 1.54E-01 | NS | 4.45E-02 | 1.3 | 8.99E-03 | -1.8 |
| A_64_P078120  | NM_001109636 | 691306    | Tmem202      | transmembrane protein 202                                          | 7.15E-01 | NS | 4.99E-02 | 1.3 | 8.85E-01 | NS   |
| A_64_P102942  | NM_054008    | 117183    | Rgc32        | response gene to complement 32                                     | 1.54E-01 | NS | 4.69E-03 | 1.4 | 1.52E-01 | NS   |
| A_42_P712191  | NM_001109207 | 499914    | Gins1        | GIN5 complex subunit 1 (Psf1 homolog)                              | 4.00E-01 | NS | 4.53E-02 | 1.4 | 4.74E-01 | NS   |
| A_44_P1000935 | NM_017052    | 24788     | Sord         | sorbitol dehydrogenase                                             | 3.68E-01 | NS | 1.12E-03 | 1.4 | 7.75E-01 | NS   |
| A_44_P166495  | NM_001012199 | 362965    | Rangap1      | RAN GTPase activating protein 1                                    | 9.38E-01 | NS | 4.86E-03 | 1.4 | 4.59E-02 | 1.9  |
| A_64_P091088  | NM_144737    | 246245    | Fmo2         | flavin containing monooxygenase 2                                  | 2.80E-01 | NS | 4.37E-02 | 1.4 | 4.25E-01 | NS   |
| A_64_P001052  | XM_001072054 | 295160    | Mnd1         | meiotic nuclear divisions 1 homolog (S. cerevisiae)                | 1.68E-01 | NS | 4.99E-02 | 1.4 | 5.71E-02 | NS   |

|              |              |        |            |                                                                               |          |    |          |     |          |      |
|--------------|--------------|--------|------------|-------------------------------------------------------------------------------|----------|----|----------|-----|----------|------|
| A_44_P398592 | NM_001108650 | 362452 | Loh12cr1   | loss of heterozygosity, 12, chromosomal region 1 homolog (human)              | 2.42E-01 | NS | 1.31E-02 | 1.4 | 4.53E-01 | NS   |
| A_64_P021440 | NM_198049    | 289459 | Slc10a6    | solute carrier family 10 (sodium/bile acid cotransporter family), member 6    | 7.17E-01 | NS | 9.09E-03 | 1.4 | 7.05E-02 | NS   |
| A_44_P158012 | NM_001107185 | 304862 | Tpr        | translocated promoter region                                                  | 1.50E-01 | NS | 2.77E-02 | 1.4 | 2.48E-01 | NS   |
| A_64_P081063 | XR_006358    | 363746 | LOC363746  | similar to 40S ribosomal protein S7 (S8)                                      | 9.17E-01 | NS | 3.09E-02 | 1.4 | 9.41E-01 | NS   |
| A_64_P029377 | NM_131909    | 170704 | Hrh4       | histamine receptor H4                                                         | 1.97E-01 | NS | 2.90E-02 | 1.4 | 5.47E-01 | NS   |
| A_64_P152447 | NM_001137643 | 499422 | Gstt3      | glutathione S-transferase, theta 3                                            | 2.05E-01 | NS | 2.10E-02 | 1.4 | 8.43E-01 | NS   |
| A_44_P557680 | NM_001014164 | 361729 | Cybas3     | cytochrome b, ascorbate dependent 3                                           | 1.16E-01 | NS | 2.14E-03 | 1.4 | 9.12E-01 | NS   |
| A_44_P513511 | NM_001106169 | 291853 | Ccdc135    | coiled-coil domain containing 135                                             | 3.20E-01 | NS | 2.23E-02 | 1.4 | 8.97E-02 | NS   |
| A_64_P155438 | XM_001059458 |        |            |                                                                               | 6.36E-01 | NS | 3.50E-02 | 1.4 | 8.37E-01 | NS   |
| A_44_P530637 | NM_001025056 | 501167 | Gmppa      | GDP-mannose pyrophosphorylase A                                               | 6.97E-01 | NS | 6.54E-03 | 1.4 | 8.82E-01 | NS   |
| A_64_P048457 | NM_001109434 | 681023 | Qsox2      | quiescin Q6 sulfhydryl oxidase 2                                              | 7.81E-01 | NS | 1.65E-02 | 1.4 | 8.52E-01 | NS   |
| A_64_P345426 | XR_007239    |        |            |                                                                               | 7.66E-02 | NS | 1.07E-02 | 1.4 | 7.87E-02 | NS   |
| A_43_P13172  | NM_133392    | 170904 | Stk17b     | serine/threonine kinase 17b                                                   | 2.26E-01 | NS | 4.70E-02 | 1.4 | 8.39E-02 | NS   |
|              |              |        |            | family with sequence similarity 110, member C                                 | 1.23E-01 | NS | 2.16E-02 | 1.4 | 4.73E-02 | 1.4  |
| A_64_P060982 | NM_001025051 | 500638 | Fam110c    | member C                                                                      | 1.23E-01 | NS | 2.16E-02 | 1.4 | 4.73E-02 | 1.4  |
| A_64_P081822 | XM_001065296 | 308768 | RGD1308541 | hypothetical LOC308768                                                        | 3.50E-01 | NS | 5.64E-03 | 1.4 | 2.46E-01 | NS   |
| A_43_P15335  | NM_053429    | 84489  | Fgfr3      | fibroblast growth factor receptor 3                                           | 8.70E-01 | NS | 5.11E-04 | 1.4 | 9.65E-02 | NS   |
| A_44_P100886 | XM_001069542 |        |            |                                                                               | 1.22E-01 | NS | 1.92E-02 | 1.4 | 2.94E-01 | NS   |
|              |              |        |            | non-metastatic cells 7, protein expressed in (nucleoside-diphosphate kinase)  | 2.69E-01 | NS | 2.32E-02 | 1.4 | 5.75E-01 | NS   |
| A_44_P323430 | NM_138532    | 171566 | Nme7       | (nucleoside-diphosphate kinase)                                               | 2.69E-01 | NS | 2.32E-02 | 1.4 | 5.75E-01 | NS   |
| A_64_P017620 | NM_001108593 | 362226 | Sec23b     | Sec23 homolog B (S. cerevisiae)                                               | 9.62E-02 | NS | 2.01E-02 | 1.4 | 4.69E-01 | NS   |
| A_64_P057281 | NM_001008854 | 360323 | RT1-N2     | RT1 class Ib, locus N2                                                        | 2.99E-01 | NS | 3.11E-02 | 1.4 | 1.34E-01 | NS   |
|              |              |        |            | sodium channel, nonvoltage-gated 1, gamma                                     | 2.71E-01 | NS | 2.97E-02 | 1.4 | 1.29E-01 | NS   |
| A_44_P226658 | NM_017046    | 24768  | Scnn1g     | gamma                                                                         | 2.71E-01 | NS | 2.97E-02 | 1.4 | 1.29E-01 | NS   |
|              |              |        |            | nuclear fragile X mental retardation protein interacting protein 1            | 9.39E-02 | NS | 7.21E-03 | 1.4 | 2.50E-01 | NS   |
| A_44_P407707 | NM_001007758 | 364430 | Nufip1     | signal peptidase complex subunit 2                                            | 9.39E-02 | NS | 7.21E-03 | 1.4 | 2.50E-01 | NS   |
|              |              |        |            | homolog (S. cerevisiae)                                                       | 2.06E-01 | NS | 4.09E-03 | 1.4 | 7.44E-02 | NS   |
| A_64_P029043 | XM_001066421 | 293142 | Spcs2      | homolog (S. cerevisiae)                                                       | 2.06E-01 | NS | 4.09E-03 | 1.4 | 7.44E-02 | NS   |
| A_64_P108264 | XM_223835    |        |            |                                                                               | 1.96E-01 | NS | 4.61E-02 | 1.4 | 8.61E-01 | NS   |
|              |              |        |            | cadherin, EGF LAG seven-pass G-type receptor 1 (flamingo homolog, Drosophila) | 4.90E-01 | NS | 2.63E-02 | 1.4 | 6.84E-01 | NS   |
| A_44_P506659 | XM_001070474 | 300128 | Celsr1     | receptor 1 (flamingo homolog, Drosophila)                                     | 4.90E-01 | NS | 2.63E-02 | 1.4 | 6.84E-01 | NS   |
| A_64_P010408 | NM_001034112 | 360631 | Mix        | MAX-like protein X                                                            | 7.59E-02 | NS | 2.61E-03 | 1.4 | 5.88E-01 | NS   |
| A_44_P203812 | NM_001039606 | 291095 | Gmfs       | GDP-mannose 4, 6-dehydratase                                                  | 5.64E-02 | NS | 2.20E-02 | 1.4 | 1.60E-01 | NS   |
|              |              |        |            | cytochrome P450, family 2, subfamily j, polypeptide 10                        | 6.33E-02 | NS | 3.02E-02 | 1.4 | 5.48E-03 | 1.9  |
| A_44_P448154 | NM_001134980 | 313373 | Cyp2j10    | polypeptide 10                                                                | 6.33E-02 | NS | 3.02E-02 | 1.4 | 5.48E-03 | 1.9  |
| A_42_P459149 | NM_080584    | 140671 | Phkg2      | phosphorylase kinase, gamma 2 (testis)                                        | 3.20E-01 | NS | 6.04E-03 | 1.4 | 6.97E-01 | NS   |
| A_44_P465188 | NM_053445    | 84575  | Fads1      | fatty acid desaturase 1                                                       | 8.21E-01 | NS | 1.44E-02 | 1.4 | 9.76E-01 | NS   |
|              |              |        |            | minichromosome maintenance complex component 5                                | 9.82E-01 | NS | 2.51E-02 | 1.4 | 1.49E-01 | NS   |
| A_64_P014774 | NM_001106170 | 291885 | Mcm5       | component 5                                                                   | 9.82E-01 | NS | 2.51E-02 | 1.4 | 1.49E-01 | NS   |
| A_43_P19867  | XM_214910    |        |            |                                                                               | 9.84E-02 | NS | 4.07E-02 | 1.4 | 9.62E-03 | -1.6 |
| A_44_P330594 | NM_001013895 | 292658 | Prkd2      | protein kinase D2                                                             | 2.28E-01 | NS | 2.85E-02 | 1.4 | 7.41E-01 | NS   |
| A_44_P431053 | NM_031027    | 81656  | Dpyd       | dihydropyrimidine dehydrogenase                                               | 8.39E-01 | NS | 1.22E-02 | 1.4 | 8.93E-01 | NS   |
| A_64_P130515 | XM_001057041 |        |            |                                                                               | 1.10E-01 | NS | 3.17E-02 | 1.4 | 9.99E-01 | NS   |
| A_44_P338068 | NM_001024355 | 500909 | Ccdc134    | coiled-coil domain containing 134                                             | 8.13E-01 | NS | 3.42E-03 | 1.4 | 8.76E-01 | NS   |
| A_64_P114953 | XM_001060275 | 302365 | RGD1564704 | similar to syntaxin 3A                                                        | 5.64E-01 | NS | 3.32E-02 | 1.4 | 1.75E-02 | -1.9 |
| A_44_P406474 | NM_022507    | 25522  | Prkcz      | protein kinase C, zeta                                                        | 4.06E-01 | NS | 3.48E-03 | 1.4 | 6.90E-01 | NS   |
| A_64_P154811 | NM_001025044 | 499980 | LOC499980  | hypothetical protein LOC499980                                                | 4.33E-01 | NS | 4.04E-02 | 1.4 | 2.57E-01 | NS   |
|              |              |        |            | solute carrier family 36 (proton/amino acid symporter), member 4              | 6.78E-02 | NS | 3.35E-02 | 1.4 | 6.97E-01 | NS   |
| A_64_P064556 | NM_001108127 | 315439 | Slc36a4    | member 4                                                                      | 6.78E-02 | NS | 3.35E-02 | 1.4 | 6.97E-01 | NS   |
| A_64_P002870 | NM_001013923 | 296318 | Ndr3       | N-myc downstream regulated gene 3                                             | 3.93E-01 | NS | 2.36E-02 | 1.4 | 7.83E-01 | NS   |
| A_44_P901088 | NM_001025141 | 498492 | Ccnb1ip1   | cyclin B1 interacting protein 1                                               | 2.41E-01 | NS | 9.16E-03 | 1.4 | 5.00E-01 | NS   |
|              |              |        |            | acyl-CoA synthetase bubblegum family member 1                                 | 9.87E-01 | NS | 2.31E-03 | 1.4 | 1.49E-01 | NS   |
| A_43_P13257  | NM_134389    | 171410 | Acsbg1     | member 1                                                                      | 9.87E-01 | NS | 2.31E-03 | 1.4 | 1.49E-01 | NS   |
| A_44_P169307 | NM_022246    | 64012  | Rad50      | RAD50 homolog (S. cerevisiae)                                                 | 1.15E-01 | NS | 2.06E-02 | 1.4 | 7.86E-02 | NS   |
| A_64_P134553 | XR_007351    |        |            |                                                                               | 5.10E-01 | NS | 9.53E-03 | 1.4 | 6.39E-02 | NS   |
| A_64_P091940 | NM_033237    | 29141  | Gal        | galanin prepropeptide                                                         | 2.24E-01 | NS | 4.86E-02 | 1.4 | 1.94E-01 | NS   |
| A_43_P15073  | XM_001058636 | 363471 | RGD1562200 | similar to GS2 gene                                                           | 7.42E-02 | NS | 3.27E-03 | 1.4 | 7.21E-01 | NS   |
| A_64_P053544 | XM_232330    |        |            |                                                                               | 4.35E-01 | NS | 8.80E-03 | 1.4 | 1.56E-01 | NS   |

|               |              |        |            |                                                                                                                                                             |          |    |          |     |          |      |
|---------------|--------------|--------|------------|-------------------------------------------------------------------------------------------------------------------------------------------------------------|----------|----|----------|-----|----------|------|
| A_64_P122088  | NM_001109009 | 367316 | Aqp12b     | aquaporin 12B<br>endo/exonuclease (5'-3'), endonuclease G-like                                                                                              | 1.21E-01 | NS | 1.20E-02 | 1.4 | 2.18E-01 | NS   |
| A_43_P21090   | NM_001106866 | 301062 | Exog       |                                                                                                                                                             | 2.64E-01 | NS | 4.92E-02 | 1.4 | 1.29E-01 | NS   |
| A_64_P079930  | NM_001168579 | 296272 | Tcf15      | transcription factor 15                                                                                                                                     | 5.69E-01 | NS | 1.20E-02 | 1.4 | 9.93E-01 | NS   |
| A_64_P025958  | NM_001108570 | 362076 | Il1f8      | interleukin 1 family, member 8                                                                                                                              | 2.27E-01 | NS | 8.94E-03 | 1.4 | 1.55E-01 | NS   |
| A_64_P083958  | NM_001100778 | 399489 | E2f1       | E2F transcription factor 1                                                                                                                                  | 4.92E-01 | NS | 5.48E-03 | 1.4 | 8.34E-01 | NS   |
| A_64_P304049  | NM_001076553 | 24678  | Pkib       | protein kinase (cAMP-dependent, catalytic) inhibitor beta                                                                                                   | 3.34E-01 | NS | 4.29E-02 | 1.4 | 5.78E-01 | NS   |
| A_42_P762213  | NM_001034139 | 304203 | Lrrc8e     | leucine rich repeat containing 8 family, member E                                                                                                           | 3.01E-01 | NS | 2.31E-02 | 1.4 | 5.90E-02 | NS   |
| A_64_P162765  | NM_001109346 | 502736 | Cpa4       | carboxypeptidase A4                                                                                                                                         | 6.74E-01 | NS | 2.48E-02 | 1.4 | 7.59E-02 | NS   |
| A_44_P1037972 | NM_001012738 | 29593  | Ckmt1      | creatine kinase, mitochondrial 1                                                                                                                            | 1.14E-01 | NS | 1.46E-04 | 1.4 | 4.33E-01 | NS   |
| A_44_P976680  | XM_001070657 |        |            |                                                                                                                                                             | 8.85E-02 | NS | 2.52E-02 | 1.4 | 2.24E-01 | NS   |
| A_64_P026266  | NM_001105750 | 117087 | Stim2      | stromal interaction molecule 2                                                                                                                              | 6.17E-01 | NS | 3.36E-02 | 1.4 | 3.98E-01 | NS   |
| A_64_P032811  | NM_001134575 | 361719 | RGD1308106 | LOC361719                                                                                                                                                   | 5.62E-02 | NS | 4.36E-02 | 1.4 | 3.48E-01 | NS   |
| A_64_P040895  | NM_001001110 | 406008 | Olr1694    | olfactory receptor 1694                                                                                                                                     | 2.02E-01 | NS | 3.32E-03 | 1.4 | 3.15E-02 | -1.8 |
| A_64_P148325  | XM_001063552 |        |            |                                                                                                                                                             | 8.17E-01 | NS | 1.28E-02 | 1.4 | 2.86E-01 | NS   |
| A_64_P104382  | NM_001134983 | 499929 | RGD1564927 | similar to TGFB-induced factor 2                                                                                                                            | 1.44E-01 | NS | 4.85E-03 | 1.4 | 6.49E-01 | NS   |
| A_44_P191753  | NM_001013170 | 314442 | Wars       | tryptophanyl-tRNA synthetase<br>minichromosome maintenance complex component 2                                                                              | 3.01E-01 | NS | 1.29E-03 | 1.4 | 5.62E-01 | NS   |
| A_44_P223446  | NM_001107873 | 312538 | Mcm5       |                                                                                                                                                             | 2.19E-01 | NS | 1.00E-03 | 1.4 | 9.63E-03 | 2.4  |
| A_64_P006633  | NM_001000666 | 404868 | Olr563     | olfactory receptor 563                                                                                                                                      | 6.07E-01 | NS | 4.96E-03 | 1.4 | 2.63E-02 | -2.0 |
| A_43_P13069   | NM_080400    | 140583 | Chek1      | CHK1 checkpoint homolog (S. pombe)                                                                                                                          | 1.42E-01 | NS | 1.78E-02 | 1.4 | 2.12E-01 | NS   |
| A_64_P010806  | XM_001054681 |        |            |                                                                                                                                                             | 7.65E-02 | NS | 1.85E-02 | 1.4 | 7.26E-01 | NS   |
| A_44_P450486  | NM_001012200 | 362969 | Ttl1       | tubulin tyrosine ligase-like family, member 1                                                                                                               | 4.64E-01 | NS | 2.93E-03 | 1.4 | 4.09E-01 | NS   |
| A_64_P013373  | XM_001077088 |        |            |                                                                                                                                                             | 8.07E-01 | NS | 1.48E-02 | 1.4 | 1.69E-01 | NS   |
| A_64_P020143  | NM_001108928 | 365465 | Cwf19l1    | CWF19-like 1, cell cycle control (S. pombe)<br>minichromosome maintenance complex component 6                                                               | 4.75E-01 | NS | 3.73E-02 | 1.4 | 3.43E-01 | NS   |
| A_44_P276338  | NM_017287    | 29685  | Mcm6       |                                                                                                                                                             | 5.12E-01 | NS | 2.35E-03 | 1.4 | 9.77E-02 | NS   |
| A_64_P148265  | XM_002726084 | 689746 | Ttl11      |                                                                                                                                                             | 6.91E-01 | NS | 4.55E-02 | 1.4 | 9.23E-01 | NS   |
| A_44_P532249  | NM_001012174 | 361810 | Fkbp5      | FK506 binding protein 5                                                                                                                                     | 5.99E-01 | NS | 4.50E-02 | 1.4 | 2.99E-02 | 2.6  |
| A_44_P294650  | NM_012514    | 497672 | Brca1      | breast cancer 1                                                                                                                                             | 8.63E-01 | NS | 2.46E-02 | 1.4 | 4.71E-01 | NS   |
| A_64_P016338  | XM_002724673 | 363799 | RGD1308154 | similar to CG11388-PA                                                                                                                                       | 3.76E-01 | NS | 1.40E-02 | 1.4 | 1.22E-01 | NS   |
| A_44_P452176  | NM_053560    | 89824  | Chi3l1     | chitinase 3-like 1<br>synovial sarcoma, X breakpoint 2 interacting protein                                                                                  | 7.96E-02 | NS | 2.14E-02 | 1.4 | 2.52E-01 | NS   |
| A_44_P408679  | NM_175597    | 308023 | Ssx2ip     |                                                                                                                                                             | 5.32E-02 | NS | 2.21E-02 | 1.4 | 7.98E-01 | NS   |
| A_44_P1029805 | XM_217035    |        |            |                                                                                                                                                             | 3.18E-01 | NS | 1.36E-02 | 1.4 | 8.92E-01 | NS   |
| A_64_P040145  | XM_001054033 | 678966 | LOC678966  | hypothetical protein LOC678966                                                                                                                              | 2.25E-01 | NS | 2.85E-02 | 1.4 | 1.36E-01 | NS   |
| A_64_P120085  | XM_001070624 | 289501 | Ankrd56    | ankyrin repeat domain 56                                                                                                                                    | 3.48E-01 | NS | 2.97E-02 | 1.4 | 1.68E-01 | NS   |
| A_44_P533786  | NM_053749    | 114592 | Aurkb      | aurora kinase B                                                                                                                                             | 5.93E-01 | NS | 1.40E-02 | 1.4 | 9.80E-03 | 2.8  |
| A_64_P070108  | NM_213562    | 309591 | Trim39     | tripartite motif-containing 39                                                                                                                              | 1.81E-01 | NS | 1.28E-02 | 1.4 | 2.05E-01 | NS   |
| A_64_P014159  | CN543219     |        |            |                                                                                                                                                             | 1.41E-01 | NS | 1.90E-03 | 1.4 | 3.78E-01 | NS   |
| A_64_P120734  | NM_012842    | 25313  | Egf        | epidermal growth factor                                                                                                                                     | 1.29E-01 | NS | 4.25E-02 | 1.4 | 9.35E-02 | NS   |
| A_44_P181202  | NM_001108122 | 315417 | Jrkl       | jerky homolog-like (mouse)<br>tumor necrosis factor (ligand) superfamily, member 8                                                                          | 7.29E-02 | NS | 8.64E-03 | 1.4 | 8.45E-03 | -1.5 |
| A_64_P139519  | XM_001064723 | 683163 | Tnfsf8     |                                                                                                                                                             | 5.94E-01 | NS | 6.79E-03 | 1.4 | 8.28E-01 | NS   |
| A_64_P083853  | NM_001107870 | 312503 | Smyd5      | SET and MYND domain containing 5<br>solute carrier family 7 (cationic amino acid transporter, y+ system), member 4                                          | 1.90E-01 | NS | 2.52E-03 | 1.4 | 5.62E-01 | NS   |
| A_64_P130962  | NM_001107078 | 303787 | Slc7a4     |                                                                                                                                                             | 7.42E-01 | NS | 7.63E-03 | 1.4 | 6.24E-01 | NS   |
| A_64_P104870  | NM_001108918 | 365361 | Lym1       | LYR motif containing 1                                                                                                                                      | 5.37E-01 | NS | 3.03E-03 | 1.4 | 1.25E-01 | NS   |
| A_64_P084323  | NM_001034949 | 500573 | Tmco4      | transmembrane and coiled-coil domains 4<br>sema domain, immunoglobulin domain (Ig), transmembrane domain (TM) and short cytoplasmic domain, (semaphorin) 4F | 7.32E-01 | NS | 1.26E-02 | 1.4 | 7.92E-02 | NS   |
| A_43_P12000   | NM_019272    | 29745  | Sema4f     |                                                                                                                                                             | 6.97E-01 | NS | 2.01E-03 | 1.4 | 8.06E-01 | NS   |
| A_44_P534154  | NM_001108852 | 363886 | Cnpy4      | canopy 4 homolog (zebrafish)                                                                                                                                | 1.30E-01 | NS | 4.90E-02 | 1.4 | 2.95E-01 | NS   |

|              |              |        |            |                                                                                              |          |    |          |     |          |      |
|--------------|--------------|--------|------------|----------------------------------------------------------------------------------------------|----------|----|----------|-----|----------|------|
| A_64_P037587 | NM_001099483 | 502301 | Vom2r36    | vomeronasal 2 receptor, 36                                                                   | 2.82E-01 | NS | 3.58E-02 | 1.4 | 8.48E-01 | NS   |
| A_64_P142141 | NM_001033062 | 290789 | Cldn23     | claudin 23                                                                                   | 8.69E-02 | NS | 1.11E-02 | 1.4 | 4.76E-02 | -1.9 |
| A_64_P046049 | NM_001008808 | 300248 | Krt73      | keratin 73                                                                                   | 5.96E-01 | NS | 1.31E-02 | 1.4 | 6.12E-01 | NS   |
| A_64_P143991 | BC100266     |        |            |                                                                                              | 4.12E-01 | NS | 4.73E-02 | 1.4 | 4.87E-01 | NS   |
| A_42_P712801 | NM_178106    | 316077 | Entpd3     | ectonucleoside triphosphate diphosphohydrolase 3                                             | 7.49E-02 | NS | 3.08E-02 | 1.4 | 6.94E-02 | NS   |
| A_44_P525295 | NM_001107822 | 311825 | RGD1307355 | similar to gene model 711                                                                    | 4.01E-01 | NS | 7.65E-03 | 1.4 | 2.46E-01 | NS   |
| A_64_P128144 | XM_344461    | 364476 | Hs6st3     | heparan sulfate 6-O-sulfotransferase 3                                                       | 8.35E-02 | NS | 2.12E-02 | 1.4 | 5.93E-01 | NS   |
| A_43_P15253  | NM_012967    | 25464  | Icam1      | intercellular adhesion molecule 1 similar to Alpha- and gamma-adaptin-binding protein p34    | 9.05E-01 | NS | 3.25E-02 | 1.4 | 7.60E-01 | NS   |
| A_64_P064269 |              | 686070 | LOC686070  |                                                                                              | 8.56E-01 | NS | 1.43E-03 | 1.4 | 3.51E-01 | NS   |
| A_64_P142540 | NM_001134569 | 360487 | RGD1561157 | RGD1561157 stress-associated endoplasmic reticulum protein 1                                 | 4.90E-01 | NS | 1.97E-02 | 1.4 | 7.09E-01 | NS   |
| A_44_P193990 | NM_030835    | 80881  | Serp1      | UDP-GlcNAc:betaGal beta-1,3-N-acetylglucosaminyltransferase-like 1                           | 1.36E-01 | NS | 4.42E-03 | 1.4 | 9.40E-01 | NS   |
| A_64_P074246 | NM_001015035 | 367384 | B3gnt1     | carboxylesterase 3                                                                           | 4.52E-01 | NS | 1.74E-02 | 1.4 | 1.68E-01 | NS   |
| A_64_P148413 | NM_133295    | 113902 | Ces3       | activating signal cointegrator 1 complex subunit 2                                           | 1.01E-01 | NS | 4.46E-02 | 1.4 | 1.75E-01 | NS   |
| A_43_P23106  | NM_001109091 | 498402 | Ascc2      |                                                                                              | 7.24E-01 | NS | 8.28E-03 | 1.4 | 4.66E-01 | NS   |
| A_64_P111774 | XM_224421    |        |            |                                                                                              | 6.15E-01 | NS | 1.02E-03 | 1.4 | 9.24E-01 | NS   |
| A_64_P005362 | NM_001000843 | 405132 | Olr819     | olfactory receptor 819                                                                       | 5.58E-01 | NS | 2.51E-02 | 1.4 | 9.58E-02 | NS   |
| A_64_P138291 | NM_001106407 | 294712 | Cenpk      | centromere protein K                                                                         | 9.27E-02 | NS | 4.05E-02 | 1.4 | 4.27E-01 | NS   |
| A_64_P087633 | NM_001107653 | 310152 | Slc45a2    | solute carrier family 45, member 2                                                           | 3.50E-01 | NS | 1.85E-02 | 1.4 | 2.63E-02 | -1.4 |
| A_44_P309081 | NM_021863    | 60460  | Hspa2      | heat shock protein alpha 2 protein phosphatase 1, regulatory (inhibitor) subunit 16A         | 7.48E-01 | NS | 4.35E-03 | 1.4 | 5.80E-01 | NS   |
| A_64_P103507 | NM_001130566 | 362944 | Ppp1r16a   | subunit 16A                                                                                  | 2.58E-01 | NS | 4.57E-04 | 1.4 | 7.21E-01 | NS   |
| A_64_P002502 | XM_001081027 | 500837 | Helb       | helicase (DNA) B                                                                             | 2.44E-01 | NS | 3.01E-02 | 1.4 | 7.99E-01 | NS   |
| A_44_P412236 | NM_053730    | 114522 | Stag3      | stromal antigen 3                                                                            | 1.63E-01 | NS | 6.43E-03 | 1.4 | 1.46E-01 | NS   |
| A_64_P080566 | NM_001010921 | 494499 | LOC494499  | LOC494499 protein                                                                            | 6.10E-02 | NS | 5.52E-03 | 1.4 | 7.47E-02 | NS   |
| A_64_P002038 | XM_001064866 |        |            |                                                                                              | 4.99E-01 | NS | 1.16E-02 | 1.4 | 2.94E-01 | NS   |
| A_44_P534089 | NM_171991    | 25203  | Ccnb1      | cyclin B1                                                                                    | 8.40E-02 | NS | 1.16E-02 | 1.4 | 3.10E-02 | 2.7  |
| A_44_P529581 | NM_138504    | 171493 | Osgin1     | oxidative stress induced growth inhibitor 1                                                  | 2.52E-01 | NS | 5.24E-04 | 1.4 | 7.28E-01 | NS   |
| A_64_P124522 | XM_002724542 | 688163 | LOC688163  | hypothetical protein LOC688163                                                               | 6.55E-02 | NS | 5.67E-03 | 1.4 | 1.22E-01 | NS   |
| A_44_P785903 | NM_001108963 | 366251 | Slc2a10    | solute carrier family 2 (facilitated glucose transporter), member 10                         | 8.48E-01 | NS | 2.56E-02 | 1.4 | 1.56E-01 | NS   |
| A_44_P339626 | NM_001000027 | 287487 | Olr1475    | olfactory receptor 1475                                                                      | 4.40E-01 | NS | 1.44E-02 | 1.4 | 3.41E-01 | NS   |
| A_44_P409820 | NM_012908    | 25385  | Faslg      | Fas ligand (TNF superfamily, member 6)                                                       | 5.79E-02 | NS | 1.69E-02 | 1.4 | 6.18E-01 | NS   |
| A_64_P048815 | NM_001108252 | 317398 | RGD1562211 | similar to ubiquitin specific protease 51                                                    | 1.33E-01 | NS | 2.91E-02 | 1.4 | 2.61E-02 | -3.7 |
| A_44_P406169 | NM_022926    | 29750  | Galnt7     | UDP-N-acetyl-alpha-D-galactosamine:polypeptide N-acetylglucosaminyltransferase 7 (GalNAc-T7) | 9.94E-01 | NS | 3.39E-02 | 1.5 | 8.56E-01 | NS   |
| A_44_P175447 | XM_218396    |        |            |                                                                                              | 9.20E-02 | NS | 2.48E-03 | 1.5 | 6.81E-01 | NS   |
| A_64_P011229 | XM_002725775 |        |            |                                                                                              | 5.51E-02 | NS | 1.83E-02 | 1.5 | 4.22E-01 | NS   |
| A_64_P030043 | NM_001009512 | 494231 | Vom1r6     | vomeronasal 1 receptor, 6                                                                    | 1.24E-01 | NS | 4.81E-02 | 1.5 | 3.68E-01 | NS   |
| A_64_P007135 | CK598562     |        |            |                                                                                              | 3.09E-01 | NS | 4.50E-02 | 1.5 | 4.00E-01 | NS   |
| A_44_P503471 | NM_030842    | 81008  | Itga7      | integrin, alpha 7                                                                            | 5.06E-01 | NS | 6.63E-03 | 1.5 | 1.62E-01 | NS   |
| A_44_P638014 | NM_001108859 | 364081 | Irf6       | interferon regulatory factor 6                                                               | 2.32E-01 | NS | 2.09E-02 | 1.5 | 8.55E-01 | NS   |
| A_44_P417065 | XM_001078022 | 116548 | Pcsk5      | proprotein convertase subtilisin/kexin type 5                                                | 7.93E-01 | NS | 1.46E-02 | 1.5 | 5.92E-01 | NS   |
| A_64_P106126 | XM_001061854 | 366078 | Sp9        | trans-acting transcription factor 9                                                          | 2.72E-01 | NS | 2.22E-02 | 1.5 | 2.76E-01 | NS   |
| A_64_P044987 | NM_001135782 | 502994 | Pramef8    | PRAME family member 8                                                                        | 2.93E-01 | NS | 4.15E-02 | 1.5 | 8.83E-01 | NS   |
| A_64_P152154 | NM_001011975 | 298079 | Aldh1b1    | aldehyde dehydrogenase 1 family, member B1                                                   | 5.08E-02 | NS | 2.45E-02 | 1.5 | 7.83E-01 | NS   |
| A_42_P784063 | NM_199370    | 25626  | Krt8       | keratin 8                                                                                    | 9.09E-02 | NS | 3.17E-03 | 1.5 | 6.48E-01 | NS   |
| A_44_P339571 | NM_019290    | 54230  | Btg3       | BTG family, member 3                                                                         | 1.82E-01 | NS | 4.66E-04 | 1.5 | 7.38E-01 | NS   |
| A_64_P053631 | NM_022937    | 65031  | Doc2a      | double C2-like domains, alpha                                                                | 2.76E-01 | NS | 1.39E-02 | 1.5 | 2.48E-01 | NS   |
| A_44_P482294 | NM_024158    | 79127  | Dck        | deoxycytidine kinase                                                                         | 7.93E-02 | NS | 4.20E-02 | 1.5 | 2.33E-01 | NS   |
| A_64_P156278 | NM_001108122 | 315417 | Jrkl       | jerky homolog-like (mouse)                                                                   | 7.61E-02 | NS | 1.17E-02 | 1.5 | 1.14E-01 | NS   |

|              |              |           |              |                                                                          |          |    |          |     |          |      |
|--------------|--------------|-----------|--------------|--------------------------------------------------------------------------|----------|----|----------|-----|----------|------|
| A_64_P099059 | NM_012957    | 25451     | Gabrb2       | gamma-aminobutyric acid (GABA) A receptor, beta 2                        | 2.69E-01 | NS | 4.30E-02 | 1.5 | 9.44E-02 | NS   |
| A_64_P124210 | XM_574101    | 498819    | Greb1l       | growth regulation by estrogen in breast cancer-like                      | 9.75E-02 | NS | 2.36E-02 | 1.5 | 2.27E-01 | NS   |
| A_42_P543004 | NM_058208    | 84607     | Socs2        | suppressor of cytokine signaling 2                                       | 8.01E-01 | NS | 1.15E-02 | 1.5 | 3.79E-01 | NS   |
| A_44_P458855 | NM_053881    | 116660    | Ptpn         | protein tyrosine phosphatase, receptor type, N                           | 2.79E-01 | NS | 4.55E-02 | 1.5 | 9.43E-01 | NS   |
| A_64_P031541 | NM_001109976 | 315139    | Map3k7ip1    | mitogen-activated protein kinase kinase 7 interacting protein 1          | 1.91E-01 | NS | 7.05E-03 | 1.5 | 1.45E-01 | NS   |
| A_64_P051890 | XM_001066357 |           |              |                                                                          | 4.42E-01 | NS | 1.45E-02 | 1.5 | 1.72E-01 | NS   |
| A_64_P375942 | NM_017043    | 24693     | Ptgs1        | prostaglandin-endoperoxide synthase 1                                    | 9.63E-01 | NS | 7.21E-04 | 1.5 | 1.92E-01 | NS   |
| A_64_P018412 | XM_001070398 | 684439    | LOC684439    | hypothetical protein LOC684439                                           | 5.39E-01 | NS | 2.58E-02 | 1.5 | 9.66E-02 | NS   |
| A_64_P036163 | NM_001000008 | 287313    | Olr1418      | olfactory receptor 1418                                                  | 5.30E-01 | NS | 3.10E-02 | 1.5 | 8.44E-01 | NS   |
| A_64_P002717 | XM_001067223 |           |              |                                                                          | 1.43E-01 | NS | 4.73E-02 | 1.5 | 6.05E-01 | NS   |
| A_44_P462076 | NM_001005383 | 300981    | Acy1         | aminoacylase 1                                                           | 8.78E-01 | NS | 5.22E-04 | 1.5 | 5.47E-01 | NS   |
| A_64_P005982 | NM_001107131 | 304375    | Arfg2        | ArfGAP with FG repeats 2                                                 | 8.27E-01 | NS | 1.71E-03 | 1.5 | 6.67E-01 | NS   |
| A_44_P998384 | NM_139338    | 246234    | Slc34a3      | solute carrier family 34 (sodium phosphate), member 3                    | 2.01E-01 | NS | 3.56E-02 | 1.5 | 7.55E-01 | NS   |
| A_43_P11633  | NM_012958    | 50577     | Galn1        | galanin receptor 1                                                       | 6.51E-01 | NS | 2.87E-02 | 1.5 | 9.16E-01 | NS   |
| A_64_P004337 | XM_001068900 | 305073    | Dtl          | denticleless homolog (Drosophila)                                        | 1.36E-01 | NS | 8.32E-03 | 1.5 | 4.92E-01 | NS   |
| A_44_P189375 | NM_001001719 | 312641    | Fancd2       | Fanconi anemia, complementation group D2                                 | 3.50E-01 | NS | 4.16E-02 | 1.5 | 4.11E-02 | 2.6  |
| A_43_P13862  | CB547252     |           |              |                                                                          | 1.29E-01 | NS | 2.02E-02 | 1.5 | 6.20E-01 | NS   |
| A_64_P031162 | XM_220113    |           |              |                                                                          | 8.00E-01 | NS | 8.10E-04 | 1.5 | 3.82E-01 | NS   |
| A_64_P138337 | NM_001024983 | 297671    | RGD1559532   | RGD1559532                                                               | 1.51E-01 | NS | 4.95E-03 | 1.5 | 2.46E-01 | NS   |
| A_44_P450159 | NM_001108948 | 365864    | Tuft1        | tuftelin 1                                                               | 2.75E-01 | NS | 3.85E-03 | 1.5 | 3.78E-01 | NS   |
| A_64_P096763 | NM_001109241 | 500200    | Atoh8        | atonal homolog 8 (Drosophila)                                            | 6.45E-01 | NS | 2.40E-03 | 1.5 | 7.83E-01 | NS   |
| A_44_P470884 | NM_001107529 | 308761    | Prc1         | protein regulator of cytokinesis 1                                       | 2.55E-01 | NS | 2.21E-03 | 1.5 | 8.18E-01 | NS   |
| A_64_P002756 | NM_001007738 | 361744    | RGD1359349   | similar to hypothetical protein MGC34760                                 | 3.38E-01 | NS | 3.87E-02 | 1.5 | 2.45E-01 | NS   |
| A_64_P109222 | NM_001099464 | 685641    | Vom2r8       | vomerolnasal 2 receptor, 8                                               | 1.19E-01 | NS | 2.09E-02 | 1.5 | 3.43E-01 | NS   |
| A_64_P064226 | NM_017109    | 29130     | Syn3         | synapsin III                                                             | 1.90E-01 | NS | 5.63E-04 | 1.5 | 1.89E-01 | NS   |
| A_64_P021566 | NM_001108085 | 314756    | Cradd        | CASP2 and RIPK1 domain containing adaptor with death domain              | 4.93E-01 | NS | 2.04E-02 | 1.5 | 5.95E-01 | NS   |
| A_44_P260348 | XR_085654    | 689316    | LOC689316    | hypothetical protein LOC689316                                           | 2.11E-01 | NS | 2.41E-03 | 1.5 | 3.56E-01 | NS   |
| A_43_P12580  | NM_031548    | 25122     | Scnn1a       | sodium channel, nonvoltage-gated, type I, alpha                          | 2.04E-01 | NS | 7.38E-03 | 1.5 | 6.81E-01 | NS   |
| A_44_P260673 | NM_001108197 | 316216    | Taf8         | TAF8 RNA polymerase II, TATA box binding protein (TBP)-associated factor | 3.33E-01 | NS | 2.94E-04 | 1.5 | 2.14E-01 | NS   |
| A_64_P032806 | NM_001134575 | 361719    | RGD1308106   | LOC361719                                                                | 5.16E-01 | NS | 7.76E-03 | 1.5 | 4.78E-01 | NS   |
| A_64_P093818 | XR_006253    | 303341    | LOC303341    | hypothetical LOC303341                                                   | 5.53E-01 | NS | 1.25E-02 | 1.5 | 3.77E-01 | NS   |
| A_44_P552624 | NM_001000222 | 293402    | Olr259       | olfactory receptor 259                                                   | 7.59E-01 | NS | 2.08E-02 | 1.5 | 3.44E-01 | NS   |
| A_64_P106548 | NM_001000344 | 295864    | Olr658       | olfactory receptor 658                                                   | 7.56E-01 | NS | 1.34E-02 | 1.5 | 7.36E-01 | NS   |
| A_64_P111163 | NM_001000315 | 295768    | Olr515       | olfactory receptor 515                                                   | 8.46E-01 | NS | 1.77E-02 | 1.5 | 3.96E-01 | NS   |
| A_44_P447585 | NM_001166676 | 100310874 | LOC100310874 | antisense RNA overlapping MCH                                            | 2.02E-01 | NS | 4.00E-02 | 1.5 | 1.14E-01 | NS   |
| A_44_P461544 | NM_001009470 | 363088    | Ccnb2        | cyclin B2                                                                | 8.39E-01 | NS | 7.60E-03 | 1.5 | 2.39E-02 | 2.8  |
| A_64_P004839 | XM_001064380 | 296788    | RGD1563154   | similar to cadherin EGF LAG seven-pass G-type receptor 2                 | 5.00E-01 | NS | 9.12E-03 | 1.5 | 3.11E-02 | -2.4 |
| A_64_P042233 | XM_001067657 |           |              |                                                                          | 2.97E-01 | NS | 1.49E-02 | 1.5 | 7.05E-01 | NS   |
| A_43_P18571  | NM_001013965 | 302991    | Tekt4        | tektin 4                                                                 | 6.03E-01 | NS | 7.57E-03 | 1.5 | 5.80E-02 | NS   |
| A_64_P066782 |              | 498924    | RGD1565104   | similar to Discs, large homolog 5 (Placenta and prostate DLG)            | 6.79E-01 | NS | 3.03E-02 | 1.5 | 1.61E-01 | NS   |
| A_44_P977318 | NM_001107170 | 304741    | Tcfcp2l1     | transcription factor CP2-like 1                                          | 7.81E-02 | NS | 1.07E-02 | 1.5 | 1.89E-01 | NS   |
| A_64_P093642 | NM_001109083 | 498310    | RGD1562052   | similar to DC8/DC31 protein                                              | 4.10E-01 | NS | 4.83E-03 | 1.5 | 5.10E-01 | NS   |
| A_44_P255305 | NM_001107459 | 308118    | Rgs17        | regulator of G-protein signaling 17                                      | 2.24E-01 | NS | 7.98E-03 | 1.6 | 1.15E-01 | NS   |
| A_64_P073738 | XR_006574    | 500700    | LOC500700    | similar to chromosome 14 open reading frame 145                          | 4.05E-01 | NS | 1.22E-03 | 1.6 | 5.88E-01 | NS   |
| A_64_P058599 | NM_198790    | 364021    | Rgs12h       | regulator of G-protein signaling like 2                                  | 8.57E-01 | NS | 8.99E-03 | 1.6 | 4.43E-01 | NS   |
| A_64_P075910 | NM_001101014 | 687031    | Ajap1        | homolog (mouse)                                                          | 4.21E-01 | NS | 2.75E-02 | 1.6 | 1.62E-02 | 2.2  |
|              |              |           |              | adherens junction associated protein 1                                   |          |    |          |     |          |      |

|              |              |        |            |                                                                   |          |    |          |     |          |      |
|--------------|--------------|--------|------------|-------------------------------------------------------------------|----------|----|----------|-----|----------|------|
| A_44_P340172 | NM_001107780 | 311446 | Hao1       | hydroxyacid oxidase (glycolate oxidase) 1                         | 9.23E-02 | NS | 4.16E-02 | 1.6 | 2.38E-01 | NS   |
| A_64_P026646 | BC158627     |        |            |                                                                   | 9.08E-01 | NS | 2.18E-02 | 1.6 | 4.02E-03 | -2.0 |
| A_64_P098260 | NM_001106552 | 296510 | Sp5        | Sp5 transcription factor                                          | 7.96E-02 | NS | 4.62E-02 | 1.6 | 9.00E-01 | NS   |
| A_64_P005391 | NM_145767    | 252880 | Prrx1      | paired related homeobox protein-like 1                            | 8.61E-01 | NS | 7.00E-03 | 1.6 | 1.61E-01 | NS   |
| A_64_P152671 | XM_229376    |        |            |                                                                   | 3.61E-01 | NS | 2.30E-02 | 1.6 | 5.14E-01 | NS   |
| A_64_P085861 | NM_001107165 | 304667 | Rtbdn      | retbindin                                                         | 5.08E-01 | NS | 3.78E-02 | 1.6 | 1.95E-01 | NS   |
| A_44_P478360 | XM_001070192 | 317589 | Mst4       | serine/threonine protein kinase MST4                              | 2.84E-01 | NS | 1.41E-02 | 1.6 | 4.49E-01 | NS   |
| A_43_P11975  | NM_019203    | 29391  | Tsx        | testis specific X-linked gene                                     | 1.10E-01 | NS | 7.06E-04 | 1.6 | 3.61E-01 | NS   |
| A_44_P452282 | U09243       | 50599  | Kcnj3      | potassium inwardly-rectifying channel, subfamily J, member 3      | 4.53E-01 | NS | 4.09E-02 | 1.6 | 3.30E-01 | NS   |
| A_44_P945669 | NM_001025768 | 499933 | Dsn1       | DSN1, MIND kinetochore complex component, homolog (S. cerevisiae) | 8.33E-02 | NS | 2.03E-02 | 1.6 | 2.69E-01 | NS   |
| A_44_P473159 | NM_012955    | 25448  | Cenpi      | centromere protein I                                              | 2.04E-01 | NS | 2.26E-02 | 1.6 | 2.66E-01 | NS   |
| A_64_P098537 | XM_001078719 | 687472 | LOC687472  | hypothetical protein LOC687472                                    | 3.12E-01 | NS | 1.25E-02 | 1.6 | 2.82E-02 | -2.0 |
| A_64_P079584 | NM_053429    | 84489  | Fgfr3      | fibroblast growth factor receptor 3                               | 7.89E-01 | NS | 3.32E-03 | 1.6 | 4.11E-01 | NS   |
| A_64_P019581 | NM_001001102 | 405998 | Olr1531    | olfactory receptor 1531                                           | 5.78E-01 | NS | 4.33E-02 | 1.6 | 1.95E-01 | NS   |
| A_64_P152532 | NM_053397    | 362572 | Artn       | artemin                                                           | 5.44E-02 | NS | 3.34E-02 | 1.6 | 6.87E-02 | NS   |
| A_64_P112260 | XR_008468    |        |            |                                                                   | 7.44E-01 | NS | 1.01E-02 | 1.6 | 8.83E-01 | NS   |
| A_64_P002735 | XM_229059    |        |            |                                                                   | 1.01E-01 | NS | 2.09E-02 | 1.6 | 3.43E-01 | NS   |
| A_64_P154570 | NM_001109173 | 499486 | Gpr150     | G protein-coupled receptor 150                                    | 9.54E-02 | NS | 1.41E-02 | 1.6 | 4.85E-01 | NS   |
| A_44_P252517 | NM_173149    | 286934 | Havcr1     | hepatitis A virus cellular receptor 1                             | 6.61E-01 | NS | 9.38E-03 | 1.6 | 1.76E-02 | -2.1 |
| A_64_P090309 | XM_001072042 |        |            |                                                                   | 9.37E-01 | NS | 3.63E-02 | 1.6 | 7.72E-01 | NS   |
| A_64_P004521 | NM_001106808 | 300458 | Npsr1      | neuropeptide S receptor 1                                         | 1.53E-01 | NS | 2.21E-02 | 1.6 | 1.68E-01 | NS   |
| A_64_P080326 | XM_218081    |        |            |                                                                   | 1.67E-01 | NS | 5.93E-03 | 1.6 | 1.75E-02 | -1.9 |
| A_64_P133766 | NM_001077666 | 287935 | RGD1308065 | hypothetical LOC287935                                            | 7.37E-01 | NS | 4.06E-02 | 1.6 | 7.36E-01 | NS   |
| A_64_P071595 | XM_002728361 | 678814 | LOC678814  | hypothetical protein LOC678814                                    | 8.21E-01 | NS | 6.82E-03 | 1.6 | 1.60E-01 | NS   |
| A_64_P082495 | NM_001134636 | 500995 | RGD1564937 | similar to RIKEN cDNA 1110032A03                                  | 3.16E-01 | NS | 2.92E-02 | 1.6 | 8.55E-01 | NS   |
| A_64_P081772 | NM_001107998 | 313765 | Slc35e2    | solute carrier family 35, member E2                               | 7.87E-01 | NS | 3.89E-02 | 1.6 | 6.66E-02 | NS   |
| A_43_P18802  | NM_001009362 | 301617 | Pask       | PAS domain containing serine/threonine kinase                     | 5.29E-01 | NS | 1.14E-04 | 1.7 | 3.75E-01 | NS   |
| A_44_P140079 | NM_001107170 | 304741 | Tcfcp2l1   | transcription factor CP2-like 1                                   | 1.33E-01 | NS | 1.11E-02 | 1.7 | 1.04E-01 | NS   |
| A_44_P205376 | NM_001108955 | 366140 | Fjx1       | four jointed box 1 (Drosophila)                                   | 9.89E-01 | NS | 1.29E-02 | 1.7 | 8.46E-01 | NS   |
| A_64_P144123 | NM_001100557 | 304103 | Olig2      | oligodendrocyte lineage transcription factor 2                    | 2.69E-01 | NS | 9.20E-03 | 1.7 | 2.64E-02 | -1.5 |
| A_64_P036049 | NM_001107376 | 307270 | Me2        | malic enzyme 2, NAD(+)-dependent, mitochondrial                   | 3.30E-01 | NS | 3.62E-02 | 1.7 | 7.06E-01 | NS   |
| A_64_P162770 | NM_001109346 | 502736 | Cpa4       | carboxypeptidase A4                                               | 7.61E-01 | NS | 1.12E-02 | 1.7 | 3.04E-01 | NS   |
| A_44_P274173 | NM_173312    | 286976 | Gcnt3      | glucosaminyl (N-acetyl) transferase 3, mucin type                 | 5.58E-02 | NS | 3.94E-02 | 1.7 | 3.32E-01 | NS   |
| A_64_P127727 | NM_001134881 | 311785 | Psd4       | pleckstrin and Sec7 domain containing 4                           | 1.84E-01 | NS | 5.03E-03 | 1.7 | 8.42E-01 | NS   |
| A_64_P162500 | NM_022628    | 64563  | Nphs1      | nephrosis 1 homolog (human)                                       | 1.01E-01 | NS | 2.77E-02 | 1.7 | 7.04E-01 | NS   |
| A_44_P380182 | NM_001109398 | 680308 | Mthfd2     | methylenetetrahydrofolate dehydrogenase (NADP+ dependent) 2,      |          |    |          |     |          |      |
| A_44_P366142 | NM_001013181 | 353227 | Zbtb16     | methylenetetrahydrofolate cyclohydrolase                          | 2.77E-01 | NS | 7.60E-03 | 1.7 | 2.13E-01 | NS   |
| A_44_P943756 | NM_001007660 | 300359 | Ccdc82     | zinc finger and BTB domain containing 16                          | 5.62E-02 | NS | 3.57E-02 | 1.7 | 4.62E-02 | 2.1  |
|              |              |        |            | coiled-coil domain containing 82                                  | 6.50E-01 | NS | 4.83E-03 | 1.7 | 8.78E-01 | NS   |
|              |              |        |            | small nuclear RNA activating complex,                             |          |    |          |     |          |      |
| A_64_P068267 | NM_001109643 | 691501 | Snpc5      | polypeptide 5                                                     | 5.76E-02 | NS | 1.92E-02 | 1.7 | 2.75E-01 | NS   |
| A_64_P130390 | BC166431     | 685125 | LOC685125  | similar to RIKEN cDNA 5031410106                                  | 3.75E-01 | NS | 3.37E-03 | 1.7 | 5.10E-01 | NS   |
| A_64_P154353 | XM_002726524 |        |            |                                                                   | 5.08E-01 | NS | 1.82E-02 | 1.7 | 8.98E-01 | NS   |
| A_43_P21748  | XM_002728983 |        |            |                                                                   | 3.42E-01 | NS | 3.21E-03 | 1.7 | 5.00E-01 | NS   |
| A_64_P022125 | NM_134332    | 171290 | Gzmc       | granzyme C                                                        | 9.15E-01 | NS | 3.36E-02 | 1.7 | 4.38E-01 | NS   |
| A_64_P138375 | NM_001008942 | 292580 | V1rd15     | vomeroneasal 1 receptor, D15                                      | 2.51E-01 | NS |          | 1.7 | 2.26E-01 | NS   |
| A_64_P116137 | AB083820     |        |            |                                                                   | 1.86E-01 | NS | 1.89E-02 | 1.7 | 9.37E-01 | NS   |
| A_64_P018361 | NM_001113787 | 498591 | RGD1559804 | similar to hypothetical protein 4930474N05                        | 4.11E-01 | NS | 2.03E-02 | 1.7 | 5.45E-01 | NS   |
| A_64_P087683 | NM_001047942 | 499541 | LOC499541  | LRRGT00045                                                        | 9.06E-02 | NS | 4.07E-02 | 1.7 | 8.69E-04 | -2.0 |
| A_44_P381917 | NM_133386    | 170897 | Sphk1      | sphingosine kinase 1                                              | 1.44E-01 | NS | 3.04E-02 | 1.7 | 2.31E-02 | 2.5  |
| A_64_P013013 | XM_229637    | 302075 | RGD1562989 | similar to serine/threonine kinase                                | 7.80E-02 | NS | 3.03E-02 | 1.7 | 2.20E-01 | NS   |
| A_44_P928621 | NM_001109162 | 499313 | Zbtb3      | zinc finger and BTB domain containing 3                           | 6.64E-01 | NS | 2.88E-02 | 1.7 | 6.56E-01 | NS   |
| A_44_P104483 | XM_222240    | 304537 | Ccdc64     | coiled-coil domain containing 64                                  | 1.47E-01 | NS | 7.92E-03 | 1.7 | 9.46E-01 | NS   |



|               |              |           |            |                                                                                                                           |          |    |          |     |          |      |
|---------------|--------------|-----------|------------|---------------------------------------------------------------------------------------------------------------------------|----------|----|----------|-----|----------|------|
| A_64_P121276  | NM_080775    | 54303     | Smgb       | neonatal submandibular gland protein B                                                                                    | 8.37E-02 | NS | 2.26E-02 | 1.7 | 9.63E-01 | NS   |
| A_64_P015841  | XM_001071528 | 689655    | LOC689655  | hypothetical protein LOC689655<br>thymocyte selection-associated high                                                     | 9.17E-01 | NS | 4.24E-02 | 1.7 | 2.27E-02 | -1.9 |
| A_64_P038384  | NM_001108654 | 362481    | Tox        | mobility group box                                                                                                        | 2.59E-01 | NS | 1.93E-02 | 1.7 | 6.61E-02 | NS   |
| A_64_P032450  | NM_172330    | 282833    | Zp4        | zona pellucida glycoprotein 4                                                                                             | 2.92E-01 | NS | 3.75E-02 | 1.8 | 9.26E-02 | NS   |
| A_44_P417595  | NM_001007726 | 360654    | Dnai2      | dynein, axonemal, intermediate chain 2                                                                                    | 7.08E-01 | NS | 3.03E-03 | 1.8 | 8.46E-01 | NS   |
| A_43_P12956   | NM_053844    | 116592    | Tff2       | trefoil factor 2                                                                                                          | 5.80E-01 | NS | 2.46E-03 | 1.8 | 3.89E-01 | NS   |
| A_44_P552514  | NM_199489    | 287673    | Ccr7       | chemokine (C-C motif) receptor 7                                                                                          | 6.31E-02 | NS | 1.38E-02 | 1.8 | 2.09E-01 | NS   |
| A_64_P150236  | XM_001069843 | 684315    | LOC684315  | similar to olfactory receptor Olr74                                                                                       | 8.06E-01 | NS | 1.43E-02 | 1.8 | 7.57E-01 | NS   |
| A_64_P068913  | NM_012648    | 24767     | Scnn1b     | sodium channel, nonvoltage-gated 1, beta                                                                                  | 4.35E-01 | NS | 1.24E-02 | 1.8 | 4.17E-01 | NS   |
| A_64_P135614  | NM_001134590 |           |            |                                                                                                                           | 5.33E-01 | NS | 3.27E-02 | 1.8 | 2.29E-01 | NS   |
| A_44_P497067  | NM_001106650 | 298031    | Susd1      | sushi domain containing 1                                                                                                 | 8.60E-01 | NS | 3.91E-02 | 1.8 | 2.24E-01 | NS   |
| A_64_P162010  | NM_001111341 | 690102    | Hist2h2ab  | histone cluster 2, H2ab                                                                                                   | 5.09E-01 | NS | 2.24E-02 | 1.8 | 4.76E-01 | NS   |
| A_64_P119369  | NM_017300    | 29725     | Baat       | bile acid Coenzyme A: amino acid N-acyltransferase (glycine N-choloyltransferase)                                         | 1.23E-01 | NS | 4.71E-02 | 1.8 | 8.71E-01 | NS   |
| A_64_P015079  | NM_053691    | 114482    | Nek2       | NIMA (never in mitosis gene a)-related expressed kinase 2                                                                 | 6.77E-01 | NS | 5.65E-04 | 1.8 | 6.73E-01 | NS   |
| A_64_P036690  | XM_001055077 | 680192    | Gpr52      | G protein-coupled receptor 52<br>family with sequence similarity 46, member B                                             | 3.54E-01 | NS | 1.68E-03 | 1.8 | 3.30E-01 | NS   |
| A_44_P497121  | NM_001107907 | 313019    | Fam46b     |                                                                                                                           | 2.85E-01 | NS | 7.78E-03 | 1.8 | 7.74E-02 | NS   |
| A_64_P015104  | NM_001106132 | 291427    | Loxhd1     | lipoygenase homology domains 1                                                                                            | 3.56E-01 | NS | 1.00E-02 | 1.8 | 4.42E-01 | NS   |
| A_64_P104810  | XM_001068151 | 288907    | Podnl1     | podocan-like 1<br>suppressor of variegation 3-9 homolog 1 (Drosophila)                                                    | 1.41E-01 | NS | 2.25E-02 | 1.8 | 1.45E-01 | NS   |
| A_64_P116981  | NM_001106956 | 302553    | Suv39h1    |                                                                                                                           | 7.76E-01 | NS | 2.92E-03 | 1.9 | 1.54E-01 | NS   |
| A_44_P274755  | NM_001104612 | 315073    | Jrk        | jerky homolog (mouse)                                                                                                     | 2.28E-01 | NS | 3.07E-02 | 1.9 | 9.38E-01 | NS   |
| A_64_P026222  | NM_001101019 | 689757    | LOC689757  | similar to osteoclast inhibitory lectin                                                                                   | 9.45E-01 | NS | 3.82E-02 | 1.9 | 3.39E-01 | NS   |
| A_64_P077461  | XM_236312    | 315728    | RGD1566296 | similar to RIKEN cDNA B230114P05                                                                                          | 3.89E-01 | NS | 6.97E-03 | 1.9 | 1.22E-01 | NS   |
| A_44_P250520  | NM_001079706 | 309036    | RGD1305412 | similar to exonuclease NEF-sp<br>similar to Solute carrier family 23, member 2 (Sodium-dependent vitamin C transporter 2) | 7.33E-02 | NS | 1.92E-03 | 1.9 | 2.51E-01 | NS   |
| A_64_P128022  | XM_001067886 | 312226    | RGD1565367 |                                                                                                                           | 4.64E-01 | NS | 3.41E-03 | 1.9 | 6.02E-01 | NS   |
| A_44_P372998  | NM_001107900 | 312913    | Cpa6       | carboxypeptidase A6                                                                                                       | 1.07E-01 | NS | 1.18E-02 | 1.9 | 1.88E-01 | NS   |
| A_64_P056975  | XM_001078307 | 497856    | RGD1563163 | similar to hypothetical protein MGC24665<br>cell division cycle 25 homolog C (S. pombe)                                   | 5.42E-01 | NS | 2.71E-04 | 1.9 | 2.51E-01 | NS   |
| A_44_P140314  | NM_001107396 | 307511    | Cdc25c     |                                                                                                                           | 7.59E-01 | NS | 2.15E-02 | 2.0 | 3.63E-01 | NS   |
| A_44_P459359  | NM_001106371 | 294071    | Hells      | helicase, lymphoid specific<br>killer cell lectin-like receptor subfamily A, member 22                                    | 1.28E-01 | NS | 2.02E-03 | 2.0 | 9.83E-01 | NS   |
| A_44_P266817  | NM_173291    | 24933     | Klra22     |                                                                                                                           | 2.51E-01 | NS | 4.33E-03 | 2.0 | 4.42E-01 | NS   |
| A_64_P003894  | NM_001173449 | 500237    | Cml2       | camello-like 2                                                                                                            | 9.77E-02 | NS | 4.36E-02 | 2.0 | 2.71E-01 | NS   |
| A_64_P043488  | XM_580116    | 500729    | RGD1559843 | RGD1559843                                                                                                                | 7.19E-01 | NS | 1.36E-02 | 2.0 | 2.74E-01 | NS   |
| A_64_P011075  | XR_005460    | 314415    | RGD1304878 | similar to 2410024A21Rik protein<br>solute carrier family 36 (proton/amino acid symporter), member 3                      | 5.65E-01 | NS | 6.44E-03 | 2.0 | 1.82E-01 | NS   |
| A_44_P222936  | NM_001024764 | 303148    | Slc36a3    |                                                                                                                           | 2.08E-01 | NS | 1.35E-03 | 2.0 | 8.64E-01 | NS   |
| A_44_P254984  | NM_013161    | 25702     | Pnlp       | pancreatic lipase                                                                                                         | 7.57E-01 | NS | 2.02E-05 | 2.0 | 7.43E-02 | NS   |
| A_64_P148931  | NM_001109567 | 690206    | LOC690206  | hypothetical protein LOC690206                                                                                            | 2.40E-01 | NS | 1.20E-02 | 2.0 | 2.98E-01 | NS   |
| A_44_P255654  | XM_002726327 |           |            |                                                                                                                           | 2.08E-01 | NS | 3.18E-03 | 2.0 | 1.95E-01 | NS   |
| A_64_P161691  | AY325233     |           |            |                                                                                                                           | 7.83E-01 | NS | 1.84E-02 | 2.0 | 1.50E-01 | NS   |
| A_44_P555399  | NM_001011913 | 289777    | Figl1      | fidgetin-like 1<br>coagulation factor V (proaccelerin, labile factor)                                                     | 7.64E-02 | NS | 1.57E-02 | 2.0 | 3.65E-01 | NS   |
| A_43_P23092   | NM_001047878 | 304929    | F5         |                                                                                                                           | 6.75E-02 | NS | 9.61E-03 | 2.0 | 2.14E-02 | -2.5 |
| A_44_P1045986 | NM_001106625 | 297698    | Erp27      | endoplasmic reticulum protein 27<br>ectonucleotide                                                                        | 8.84E-01 | NS | 3.65E-02 | 2.0 | 2.42E-01 | NS   |
| A_64_P058107  | NM_001107311 | 306460    | Enpp6      | pyrophosphatase/phosphodiesterase 6                                                                                       | 2.67E-01 | NS | 2.27E-02 | 2.0 | 7.47E-01 | NS   |
| A_64_P013002  | XM_001072551 | 684932    | LOC684932  | similar to Zinc finger protein 75                                                                                         | 7.01E-01 | NS | 1.65E-02 | 2.1 | 1.02E-03 | -2.3 |
| A_64_P026908  | NM_001107193 | 304935    | Tbx19      | T-box 19                                                                                                                  | 9.54E-01 | NS | 2.19E-02 | 2.1 | 3.90E-01 | NS   |
| A_44_P837192  | XM_002726414 | 685999    | Uroc1      | urocanase domain containing 1                                                                                             | 7.68E-01 | NS | 1.08E-02 | 2.1 | 2.21E-01 | NS   |
| A_44_P473711  | XM_002724597 |           |            |                                                                                                                           | 6.28E-01 | NS | 8.32E-03 | 2.1 | 8.48E-01 | NS   |
| A_64_P122979  | NM_001103355 | 100125363 | Fbx13      | F-box and leucine-rich repeat protein 13                                                                                  | 7.96E-01 | NS | 1.63E-03 | 2.1 | 8.40E-01 | NS   |

|              |              |           |              |                                                                              |          |    |          |     |          |      |
|--------------|--------------|-----------|--------------|------------------------------------------------------------------------------|----------|----|----------|-----|----------|------|
| A_64_P106440 | XM_347335    | 368178    | Hoxc9        | homeobox C9                                                                  | 6.62E-01 | NS | 2.57E-02 | 2.1 | 3.19E-01 | NS   |
| A_64_P010109 | NM_001177819 | 100362110 | LOC100362111 | LCRRGT00155-like                                                             | 6.33E-01 | NS | 1.50E-02 | 2.1 | 1.66E-01 | NS   |
| A_64_P100158 | XM_001069272 |           |              |                                                                              | 6.94E-01 | NS | 4.81E-02 | 2.1 | 5.47E-01 | NS   |
| A_64_P003854 | J04544       | 24476     | lapp         | islet amyloid polypeptide                                                    | 4.93E-01 | NS | 1.02E-02 | 2.1 | 2.30E-01 | NS   |
| A_42_P604033 | NM_172047    | 266787    | Eaf2         | ELL associated factor 2                                                      | 7.37E-02 | NS | 4.65E-02 | 2.1 | 1.53E-01 | NS   |
| A_64_P129300 | XM_001081650 |           |              |                                                                              | 1.31E-01 | NS | 1.22E-02 | 2.1 | 4.92E-02 | -1.5 |
| A_44_P945723 | NM_001107469 | 308266    | Zc3h12d      | zinc finger CCCH type containing 12D                                         | 5.33E-01 | NS | 6.04E-03 | 2.2 | 6.97E-01 | NS   |
| A_64_P075957 | XM_001066935 | 313482    | Zyg11a       | zyg-11 homolog A (C. elegans)                                                | 1.53E-01 | NS | 6.00E-03 | 2.2 | 2.80E-01 | NS   |
| A_64_P050418 | XM_218282    |           |              |                                                                              | 1.09E-01 | NS | 3.49E-02 | 2.2 | 7.60E-01 | NS   |
| A_44_P554985 | NM_001001089 | 405983    | Olr1391      | olfactory receptor 1391                                                      | 7.70E-02 | NS | 9.49E-04 | 2.2 | 4.14E-01 | NS   |
| A_64_P129792 | NM_001001287 | 405907    | Olr77        | olfactory receptor 77                                                        | 5.13E-01 | NS | 7.80E-03 | 2.2 | 5.86E-01 | NS   |
| A_64_P025002 | NM_001080938 | 690472    | Tas2r124     | taste receptor, type 2, member 124                                           | 3.13E-01 | NS | 1.52E-02 | 2.3 | 8.01E-01 | NS   |
| A_44_P335446 | NM_001012089 | 311406    | Dusp2        | dual specificity phosphatase 2                                               | 7.77E-01 | NS | 3.64E-02 | 2.3 | 8.87E-01 | NS   |
| A_64_P022399 | BX883050     |           |              |                                                                              | 3.66E-01 | NS | 1.59E-02 | 2.4 | 2.03E-01 | NS   |
| A_44_P344492 | NM_001012226 | 367264    | Stat4        | signal transducer and activator of transcription 4                           | 7.72E-01 | NS | 3.67E-02 | 2.4 | 4.01E-01 | NS   |
| A_64_P074775 | NM_001012230 | 497101    | Xkrx         | XK, Kell blood group complex subunit-related, X-linked                       | 6.20E-01 | NS | 3.24E-02 | 2.4 | 9.39E-01 | NS   |
| A_64_P312344 | XM_001078375 | 311404    | Ap4e1        | adaptor-related protein complex 4, epsilon 1 subunit                         | 7.83E-01 | NS | 1.41E-02 | 2.4 | 1.97E-01 | NS   |
| A_64_P098631 | NM_001106517 | 296188    | Sptlc3       | serine palmitoyltransferase, long chain base subunit 3                       | 9.52E-01 | NS | 1.00E-04 | 2.4 | 3.41E-01 | NS   |
| A_42_P674050 | NM_001107225 | 305438    | Sorcs2       | sortilin-related VPS10 domain containing receptor 2                          | 6.16E-01 | NS | 7.97E-03 | 2.7 | 8.95E-01 | NS   |
| A_64_P030739 | NM_030997    | 29461     | Vgf          | VEGF nerve growth factor inducible                                           | 9.75E-02 | NS | 4.55E-02 | 2.7 | 3.35E-02 | 2.6  |
| A_64_P093320 | XM_001054194 | 679721    | LOC679721    | similar to MIC2 like 1                                                       | 8.81E-01 | NS | 1.73E-04 | 2.8 | 2.01E-01 | NS   |
| A_64_P070318 | XR_009032    | 500902    | RGD1565356   | similar to RIKEN cDNA 2210421G13                                             | 8.40E-01 | NS | 3.81E-02 | 2.9 | 5.83E-01 | NS   |
| A_64_P006998 | NM_001025138 | 498365    | Tmem156      | transmembrane protein 156                                                    | 2.04E-01 | NS | 4.76E-02 | 3.0 | 8.47E-01 | NS   |
| A_42_P602724 | NM_053299    | 29168     | Ubd          | ubiquitin D                                                                  | 1.76E-01 | NS | 1.46E-02 | 5.3 | 7.22E-01 | NS   |
| A_44_P103225 | NM_001108140 | 315609    | Cd3e         | CD3 molecule, epsilon polypeptide                                            | 1.88E-01 | NS | 2.90E-02 | 6.4 | 9.81E-01 | NS   |
| A_44_P828963 | NM_001024344 | 500449    | Sit1         | signaling threshold regulating transmembrane adaptor 1                       | 3.50E-01 | NS | 3.68E-02 | 6.6 | 6.90E-01 | NS   |
| A_42_P823322 | NM_017315    | 50621     | Slc23a1      | solute carrier family 23 (nucleobase transporters), member 1                 | 2.80E-01 | NS | 8.81E-02 | NS  | 4.53E-02 | -5.8 |
| A_64_P116977 | XM_001081860 | 501530    | RGD1560792   | RGD1560792                                                                   | 9.94E-01 | NS | 3.78E-01 | NS  | 2.09E-02 | -5.0 |
| A_43_P19822  | NM_001013867 | 288478    | RspH10b      | radial spoke head 10 homolog B (Chlamydomonas)                               | 9.39E-01 | NS | 2.94E-01 | NS  | 4.98E-02 | -4.3 |
| A_64_P015951 | NM_001047947 | 499573    | LOC499573    | LRRGT00056                                                                   | 6.08E-02 | NS | 7.31E-01 | NS  | 4.58E-02 | -4.0 |
| A_64_P039192 | XM_001056753 | 315350    | Irs4         | insulin receptor substrate 4                                                 | 1.16E-01 | NS | 4.55E-01 | NS  | 1.87E-02 | -4.0 |
| A_44_P105337 | XM_345366    |           |              |                                                                              | 9.31E-01 | NS | 3.69E-01 | NS  | 1.84E-02 | -4.0 |
| A_44_P117744 | NM_021703    | 60332     | Akap14       | A kinase (PRKA) anchor protein 14                                            | 9.58E-01 | NS | 8.16E-01 | NS  | 4.97E-03 | -4.0 |
| A_64_P144338 | XM_576362    |           |              |                                                                              | 2.49E-01 | NS | 4.29E-01 | NS  | 4.05E-02 | -3.9 |
| A_64_P094327 | NM_031597    | 29682     | Kcnq3        | potassium voltage-gated channel, KQT-like subfamily, member 3                | 9.13E-02 | NS | 5.04E-01 | NS  | 2.02E-02 | -3.9 |
| A_42_P594793 | NM_138836    | 192107    | Prss8        | protease, serine, 8                                                          | 1.89E-01 | NS | 4.36E-01 | NS  | 4.59E-02 | -3.8 |
| A_44_P173127 | XM_223400    |           |              |                                                                              | 3.61E-01 | NS | 7.41E-01 | NS  | 4.19E-02 | -3.8 |
| A_44_P578061 | NM_001106456 | 295326    | RGD1308694   | similar to hypothetical protein MGC47256                                     | 6.56E-01 | NS | 3.33E-01 | NS  | 2.97E-02 | -3.7 |
| A_64_P108389 | NM_001108036 | 314262    | Plekhh1      | pleckstrin homology domain containing, family H (with MyTH4 domain) member 1 | 9.02E-01 | NS | 8.54E-01 | NS  | 5.06E-03 | -3.7 |
| A_64_P140316 | NM_001047967 | 501233    | LOC501233    | LRRGT00080                                                                   | 3.24E-01 | NS | 9.53E-01 | NS  | 1.09E-02 | -3.7 |
| A_64_P094722 | XR_009018    | 299637    | RGD1561530   | similar to Tie6 protein                                                      | 3.61E-01 | NS | 1.39E-01 | NS  | 4.63E-02 | -3.7 |
| A_43_P15439  | NM_133597    | 171131    | Chrn3        | cholinergic receptor, nicotinic, beta 3                                      | 8.79E-01 | NS | 4.35E-01 | NS  | 2.06E-02 | -3.7 |
| A_64_P009057 | XM_229254    |           |              |                                                                              | 6.70E-01 | NS | 6.02E-01 | NS  | 4.21E-02 | -3.7 |
| A_44_P576822 | NM_080771    | 25196     | Inhbb        | inhibin beta-B                                                               | 1.40E-01 | NS | 2.22E-01 | NS  | 3.28E-02 | -3.5 |
| A_64_P105362 | NM_001127486 | 311113    | RGD1308818   | similar to hypothetical protein                                              | 3.18E-01 | NS | 5.18E-01 | NS  | 4.88E-02 | -3.5 |
| A_64_P060003 | XM_002724669 | 303039    | Wwc1         | WW and C2 domain containing 1                                                | 3.06E-01 | NS | 7.63E-01 | NS  | 4.42E-02 | -3.5 |
| A_64_P109118 | NM_023096    | 65272     | Kcnk10       | potassium channel, subfamily K, member 10                                    | 6.25E-01 | NS | 5.39E-01 | NS  | 3.25E-02 | -3.4 |
| A_44_P337914 | XM_229254    |           |              |                                                                              | 6.89E-01 | NS | 3.41E-01 | NS  | 4.38E-04 | -3.4 |
| A_64_P305283 | XM_001073783 |           |              |                                                                              | 3.55E-01 | NS | 6.10E-01 | NS  | 1.57E-02 | -3.4 |

|               |              |           |              |                                                                      |          |    |          |    |          |      |
|---------------|--------------|-----------|--------------|----------------------------------------------------------------------|----------|----|----------|----|----------|------|
| A_64_P140950  | NM_001000405 | 298049    | Olr841       | olfactory receptor 841                                               | 9.81E-01 | NS | 9.36E-02 | NS | 1.41E-02 | -3.3 |
| A_64_P067447  | NM_001109440 | 681337    | Acot4        | acyl-CoA thioesterase 4                                              | 8.95E-01 | NS | 5.82E-01 | NS | 3.32E-02 | -3.3 |
| A_44_P159155  | XM_227688    |           |              |                                                                      | 4.70E-01 | NS | 6.87E-01 | NS | 9.62E-03 | -3.3 |
| A_64_P127748  | NM_001002024 | 432363    | Slco4c1      | solute carrier organic anion transporter family, member 4C1          | 8.75E-02 | NS | 1.50E-01 | NS | 4.50E-02 | -3.3 |
| A_64_P005907  | NM_131912    | 170739    | Kcnh7        | potassium voltage-gated channel, subfamily H (eag-related), member 7 | 1.91E-01 | NS | 4.20E-01 | NS | 5.53E-03 | -3.3 |
| A_64_P012388  | NM_001107038 | 303443    | Stxbp4       | syntaxin binding protein 4                                           | 7.66E-01 | NS | 9.48E-01 | NS | 1.47E-02 | -3.3 |
| A_64_P109909  | XM_002726209 | 296512    | Fmn1         | formin 1                                                             | 9.79E-02 | NS | 9.78E-01 | NS | 3.48E-02 | -3.3 |
| A_44_P1028743 | NM_001109304 | 501121    | Cfc1         | cripto, FRL-1, cryptic family 1                                      | 5.53E-02 | NS | 2.41E-01 | NS | 2.02E-02 | -3.3 |
| A_64_P002661  | XM_001061908 | 295071    | RGD1559622   | similar to hypothetical protein C130079G13                           | 2.57E-01 | NS | 6.76E-02 | NS | 2.22E-03 | -3.2 |
| A_44_P511470  | XM_001070204 | 363288    | Kif1a        | kinesin family member 1A                                             | 4.35E-01 | NS | 1.76E-01 | NS | 1.56E-03 | -3.2 |
| A_64_P082281  | NM_024378    | 79219     | Grid1        | glutamate receptor, ionotropic, delta 1                              | 3.60E-01 | NS | 5.72E-01 | NS | 1.03E-03 | -3.2 |
| A_64_P090921  | NM_001013962 | 302845    | LOC302845    | similar to mage-k1                                                   | 1.07E-01 | NS | 7.44E-01 | NS | 3.62E-03 | -3.2 |
| A_44_P119575  | XM_343438    |           |              |                                                                      | 2.45E-01 | NS | 9.42E-01 | NS | 3.28E-02 | -3.1 |
| A_64_P064671  | XM_001054278 | 116694    | Capn9        | calpain 9                                                            | 1.23E-01 | NS | 2.64E-01 | NS | 4.10E-03 | -3.1 |
| A_42_P632469  | NM_001106171 | 291908    | Tox3         | TOX high mobility group box family member 3                          | 2.87E-01 | NS | 5.42E-01 | NS | 4.16E-02 | -3.1 |
| A_44_P363291  | NM_023096    | 65272     | Kcnk10       | potassium channel, subfamily K, member 10                            | 9.42E-01 | NS | 9.83E-01 | NS | 4.43E-02 | -3.0 |
| A_44_P449764  | NM_032990    | 29628     | Gria3        | glutamate receptor, ionotropic, AMPA 3                               | 7.37E-02 | NS | 9.10E-01 | NS | 7.49E-03 | -3.0 |
| A_43_P22944   | NM_201655    | 291850    | Tepp         | testis, prostate and placenta expressed                              | 1.36E-01 | NS | 1.18E-01 | NS | 2.32E-02 | -3.0 |
| A_64_P109232  | NM_001109149 | 499194    | Nmb          | neuromedin B                                                         | 5.07E-02 | NS | 1.16E-01 | NS | 2.23E-02 | -3.0 |
| A_64_P059964  | NM_001013858 | 287472    | Tlcd1        | TLC domain containing 1                                              | 1.07E-01 | NS | 1.07E-01 | NS | 4.79E-02 | -3.0 |
| A_64_P057740  | NM_001107732 | 311051    | Ccdc148      | coiled-coil domain containing 148                                    | 2.80E-01 | NS | 3.62E-01 | NS | 4.60E-02 | -2.9 |
| A_44_P1035656 | NM_012752    | 25145     | Cd24         | CD24 molecule                                                        | 8.08E-02 | NS | 3.93E-01 | NS | 4.97E-02 | -2.9 |
| A_64_P016548  | NM_053424    | 84484     | Slc4a4       | solute carrier family 4 (anion exchanger), member 4                  | 5.85E-02 | NS | 2.99E-01 | NS | 1.92E-02 | -2.9 |
| A_44_P364447  | NM_001014102 | 316426    | Spats2l      | spermatogenesis associated, serine-rich 2-like                       | 8.51E-02 | NS | 5.18E-01 | NS | 4.67E-03 | -2.9 |
| A_44_P1010902 | NM_031702    | 65132     | Cldn7        | claudin 7                                                            | 1.32E-01 | NS | 1.73E-01 | NS | 4.17E-02 | -2.9 |
| A_44_P1039871 | NM_001024265 | 315665    | RGD1311251   | similar to RIKEN cDNA 4930550C14                                     | 4.23E-01 | NS | 4.53E-01 | NS | 3.73E-03 | -2.9 |
| A_44_P651881  | XR_085592    |           |              |                                                                      | 1.69E-01 | NS | 2.82E-01 | NS | 4.09E-02 | -2.9 |
| A_64_P142625  | NM_001079890 | 312790    | Gprc5a       | G protein-coupled receptor, family C, group 5, member A              | 6.12E-01 | NS | 1.91E-01 | NS | 1.75E-02 | -2.9 |
| A_64_P009212  | NM_053591    | 94199     | Dpep1        | dipeptidase 1 (renal)                                                | 3.87E-01 | NS | 8.00E-01 | NS | 2.72E-02 | -2.9 |
| A_44_P628515  | BG666881     |           |              |                                                                      | 9.63E-01 | NS | 5.67E-01 | NS | 1.99E-02 | -2.9 |
| A_64_P033710  | XM_001081149 | 363667    | Hlf          | hepatic leukemia factor                                              | 6.78E-01 | NS | 7.25E-01 | NS | 1.85E-03 | -2.9 |
| A_64_P140761  | NM_130417    | 155430    | Hey2         | hairy/enhancer-of-split related with YRPW motif 2                    | 5.82E-01 | NS | 8.45E-01 | NS | 5.13E-03 | -2.9 |
| A_44_P1007870 | NM_001106541 | 296366    | Wfdc3        | WAP four-disulfide core domain 3                                     | 1.61E-01 | NS | 7.84E-01 | NS | 1.59E-02 | -2.8 |
| A_64_P003997  | NM_131906    | 170698    | Slco1a4      | solute carrier organic anion transporter family, member 1a4          | 2.24E-01 | NS | 1.12E-01 | NS | 3.29E-02 | -2.8 |
| A_64_P261822  | NM_053945    | 116839    | Rims2        | regulating synaptic membrane exocytosis 2                            | 9.45E-01 | NS | 7.54E-01 | NS | 4.34E-02 | -2.8 |
| A_64_P059257  | NM_138511    | 171517    | Gpc2         | glypican 2                                                           | 3.45E-01 | NS | 6.72E-01 | NS | 1.95E-02 | -2.8 |
| A_64_P133992  | NM_001008825 | 366992    | Kb15         | type II keratin Kb15                                                 | 1.61E-01 | NS | 8.52E-01 | NS | 3.90E-02 | -2.8 |
| A_64_P005952  | NM_016993    | 24224     | Bcl2         | B-cell CLL/lymphoma 2                                                | 1.74E-01 | NS | 9.73E-01 | NS | 3.63E-02 | -2.8 |
| A_43_P13454   | NM_001108578 | 362107    | Aif1l        | allograft inflammatory factor 1-like                                 | 2.31E-01 | NS | 5.20E-01 | NS | 4.64E-02 | -2.8 |
| A_42_P567268  | NM_001137564 | 689415    | Mt2A         | metallothionein 2A                                                   | 6.42E-01 | NS | 1.65E-01 | NS | 1.54E-02 | -2.8 |
| A_64_P134581  | NM_001134507 | 293613    | RGD1309350   | similar to transthyretin (4L369)                                     | 9.67E-02 | NS | 1.70E-01 | NS | 2.19E-02 | -2.8 |
| A_64_P154122  | NM_053562    | 89826     | Rpe65        | retinal pigment epithelium 65                                        | 5.47E-01 | NS | 2.37E-01 | NS | 4.88E-02 | -2.8 |
| A_64_P014058  | NM_001177909 | 100366030 | LOC100366030 | CG37858-like                                                         | 6.46E-02 | NS | 2.49E-01 | NS | 4.12E-02 | -2.8 |
| A_44_P129330  | NM_001107505 | 308516    | Rhpn2        | rhopilin, Rho GTPase binding protein 2                               | 5.15E-02 | NS | 5.15E-01 | NS | 2.62E-02 | -2.7 |
| A_64_P094120  | NM_001001278 | 293815    | Olr382       | olfactory receptor 382                                               | 8.37E-01 | NS | 3.73E-01 | NS | 7.88E-04 | -2.7 |
| A_64_P163277  | XM_001079039 | 296152    | Tgm6         | transglutaminase 6                                                   | 8.42E-01 | NS | 9.66E-01 | NS | 2.75E-02 | -2.7 |
| A_42_P603980  | NM_173109    | 286888    | Wfdc2        | WAP four-disulfide core domain 2                                     | 1.86E-01 | NS | 6.64E-01 | NS | 4.64E-02 | -2.7 |
| A_64_P074806  | NM_001108936 | 365657    | Marveld2     | MARVEL domain containing 2                                           | 9.42E-01 | NS | 8.98E-01 | NS | 1.92E-04 | -2.7 |

|               |              |           |              |                                                                                              |          |    |          |    |          |      |
|---------------|--------------|-----------|--------------|----------------------------------------------------------------------------------------------|----------|----|----------|----|----------|------|
| A_64_P016549  | NM_053424    | 84484     | Slc4a4       | solute carrier family 4 (anion exchanger), member 4                                          | 9.20E-02 | NS | 4.80E-01 | NS | 9.34E-03 | -2.7 |
| A_64_P006625  | NM_001134701 | 100188935 | Rt1.aa       | MHC class I RT1.Aa alpha-chain                                                               | 2.13E-01 | NS | 8.24E-01 | NS | 4.34E-02 | -2.7 |
| A_64_P056939  | XM_001053285 | 678755    | LOC678755    | similar to Spetex-2F protein                                                                 | 1.48E-01 | NS | 3.49E-01 | NS | 3.31E-02 | -2.7 |
| A_42_P633797  | NM_001011928 | 291984    | Dpep2        | dipeptidase 2                                                                                | 1.48E-01 | NS | 6.52E-01 | NS | 4.93E-02 | -2.7 |
| A_64_P020804  | NM_001107402 | 307563    | Dsc3         | desmocollin 3                                                                                | 4.60E-01 | NS | 2.87E-01 | NS | 1.42E-02 | -2.7 |
| A_43_P11843   | NM_017163    | 29323     | Slc6a18      | solute carrier family 6, member 18                                                           | 7.47E-01 | NS | 1.04E-01 | NS | 5.17E-04 | -2.6 |
| A_64_P110294  | XM_001059222 | 680865    | Tex13b       | testis expressed 13B                                                                         | 2.83E-01 | NS | 7.70E-01 | NS | 8.51E-03 | -2.6 |
| A_64_P096006  | NM_001113753 | 365313    | Xrra1        | X-ray radiation resistance associated 1 membrane bound O-acyltransferase domain containing 2 | 5.83E-01 | NS | 3.80E-01 | NS | 3.63E-02 | -2.6 |
| A_43_P21870   | NM_001108016 | 313997    | Mboat2       | domain containing 2                                                                          | 6.55E-02 | NS | 6.93E-01 | NS | 1.82E-02 | -2.6 |
| A_64_P081551  | BP474671     |           |              |                                                                                              | 7.40E-01 | NS | 2.64E-01 | NS | 4.29E-02 | -2.6 |
| A_64_P132726  | XR_085881    | 690120    | LOC690120    | hypothetical protein LOC690120                                                               | 3.37E-01 | NS | 2.06E-01 | NS | 2.66E-02 | -2.6 |
| A_64_P137491  | NM_001100540 | 298917    | lah1         | isoamyl acetate-hydrolyzing esterase 1 homolog (S. cerevisiae)                               | 2.63E-01 | NS | 8.88E-01 | NS | 2.90E-02 | -2.6 |
| A_43_P11684   | NM_013059    | 25586     | Alpl         | alkaline phosphatase, liver/bone/kidney                                                      | 4.33E-01 | NS | 8.39E-01 | NS | 2.92E-03 | -2.6 |
| A_44_P187181  | NM_012630    | 24684     | Prlr         | prolactin receptor                                                                           | 2.50E-01 | NS | 4.54E-01 | NS | 2.91E-02 | -2.6 |
| A_64_P094796  | NM_133513    | 65182     | Prol1        | proline rich, lacrimal 1                                                                     | 4.96E-01 | NS | 9.40E-01 | NS | 4.42E-02 | -2.6 |
| A_44_P515895  | XM_001068791 | 297025    | Kel          | Kell blood group, metallo-endopeptidase                                                      | 3.07E-01 | NS | 3.59E-01 | NS | 1.22E-02 | -2.6 |
| A_64_P068197  | NM_138872    | 85435     | Smad9        | SMAD family member 9                                                                         | 5.51E-01 | NS | 3.62E-01 | NS | 3.06E-02 | -2.5 |
| A_64_P095620  | XM_001053146 | 499276    | LOC499276    | similar to RIKEN cDNA 1700022C21                                                             | 7.12E-01 | NS | 2.65E-01 | NS | 4.70E-02 | -2.5 |
| A_64_P091995  | NM_001109132 | 498950    | Marveld3     | MARVEL domain containing 3                                                                   | 2.07E-01 | NS | 2.67E-01 | NS | 1.64E-02 | -2.5 |
| A_43_P11563   | NM_012784    | 25248     | Cnr1         | cannabinoid receptor 1 (brain)                                                               | 5.09E-01 | NS | 8.08E-01 | NS | 4.72E-03 | -2.5 |
| A_64_P005557  | XM_001057905 | 680589    | LOC680589    | hypothetical protein LOC680589                                                               | 1.13E-01 | NS | 2.65E-01 | NS | 3.28E-02 | -2.5 |
| A_64_P082466  | NM_001008939 | 494286    | Vom1r46      | vomeroneasal 1 receptor, 46                                                                  | 2.47E-01 | NS | 4.15E-01 | NS | 2.77E-03 | -2.5 |
| A_64_P124833  | XM_002725649 | 100365247 | LOC100365247 | hypothetical protein LOC100365247                                                            | 2.81E-01 | NS | 3.07E-01 | NS | 4.81E-02 | -2.5 |
| A_64_P082678  | BC168970     | 364952    | Nkd1         | naked cuticle homolog 1 (Drosophila)                                                         | 1.70E-01 | NS | 3.50E-01 | NS | 4.73E-02 | -2.5 |
| A_44_P480032  | NM_001000387 | 296678    | Olf416       | olfactory receptor 416                                                                       | 9.44E-01 | NS | 6.65E-02 | NS | 3.91E-02 | -2.5 |
| A_64_P019106  | NM_001106840 | 300850    | Gsta4        | glutathione S-transferase alpha 4                                                            | 1.21E-01 | NS | 3.45E-01 | NS | 2.32E-02 | -2.5 |
| A_44_P107308  | NM_012959    | 25454     | Gfra1        | GDNF family receptor alpha 1 phosphoinositide-3-kinase, regulatory subunit 3 (gamma)         | 1.36E-01 | NS | 3.20E-01 | NS | 2.53E-02 | -2.5 |
| A_44_P343060  | NM_022213    | 60664     | Pik3r3       | subunit 3 (gamma)                                                                            | 8.27E-01 | NS | 9.72E-01 | NS | 6.14E-03 | -2.5 |
| A_64_P061590  | XM_001081228 | 688126    | LOC688126    | hypothetical protein LOC688126                                                               | 1.53E-01 | NS | 3.33E-01 | NS | 2.40E-02 | -2.5 |
| A_44_P368178  | NM_001171096 | 100328908 | RGD1565819   | similar to C20orf174                                                                         | 6.65E-01 | NS | 7.19E-01 | NS | 2.79E-02 | -2.5 |
| A_44_P194230  | NM_022632    | 360272    | Slit2        | slit homolog 2 (Drosophila)                                                                  | 1.30E-01 | NS | 2.08E-01 | NS | 1.19E-02 | -2.5 |
| A_44_P379588  | NM_013123    | 25663     | Il1r1        | interleukin 1 receptor, type I                                                               | 6.45E-01 | NS | 3.00E-01 | NS | 7.98E-03 | -2.5 |
| A_64_P124751  | AB008908     | 63851     | Fgf14        | fibroblast growth factor 14                                                                  | 2.61E-01 | NS | 3.59E-01 | NS | 1.91E-02 | -2.5 |
| A_64_P036474  | NM_173109    | 286888    | Wfdc2        | WAP four-disulfide core domain 2                                                             | 1.39E-01 | NS | 3.75E-01 | NS | 4.98E-02 | -2.5 |
| A_64_P003830  | XM_229294    |           |              |                                                                                              | 6.13E-01 | NS | 8.12E-01 | NS | 3.15E-02 | -2.5 |
| A_42_P664274  | NM_001079705 | 292139    | RGD1311558   | similar to 4930506M07Rik protein                                                             | 1.33E-01 | NS | 4.15E-01 | NS | 3.68E-02 | -2.5 |
| A_64_P017758  | NM_001126086 | 500606    | Morn2        | MORN repeat containing 2                                                                     | 1.35E-01 | NS | 6.22E-01 | NS | 1.68E-02 | -2.5 |
| A_64_P047770  | XM_001064806 |           |              |                                                                                              | 2.27E-01 | NS | 1.21E-01 | NS | 4.66E-02 | -2.5 |
| A_44_P440381  | AY321326     |           |              |                                                                                              | 3.18E-01 | NS | 6.75E-01 | NS | 3.02E-02 | -2.5 |
| A_64_P162418  | NM_001135087 | 681033    | Tessp1       | testis serine protease 1                                                                     | 8.97E-02 | NS | 8.86E-01 | NS | 2.42E-02 | -2.4 |
| A_64_P122327  | XM_001073821 | 686376    | LOC686376    | similar to oocyte specific homeobox 6                                                        | 2.39E-01 | NS | 7.32E-02 | NS | 2.58E-02 | -2.4 |
| A_64_P153105  | NM_001106424 | 294945    | RGD1562890   | RGD1562890                                                                                   | 8.46E-01 | NS | 1.35E-01 | NS | 1.41E-03 | -2.4 |
| A_64_P089627  | CK469547     | 680872    | LOC680872    | hypothetical protein LOC680872                                                               | 5.52E-01 | NS | 1.46E-01 | NS | 2.52E-02 | -2.4 |
| A_64_P072933  | NM_001107591 | 309377    | Sfrp5        | secreted frizzled-related protein 5                                                          | 8.47E-02 | NS | 1.54E-01 | NS | 4.53E-02 | -2.4 |
| A_64_P070008  | NM_001099647 | 685045    | LOC685045    | similar to Protein C6orf115                                                                  | 5.29E-01 | NS | 7.67E-01 | NS | 1.60E-03 | -2.4 |
| A_64_P037112  | XM_002728976 | 502448    | RGD1563833   | similar to putative homeobox protein                                                         | 9.77E-01 | NS | 5.18E-01 | NS | 3.33E-02 | -2.4 |
| A_64_P009123  | XM_001066662 | 498305    | Spta17       | spermatogenesis associated 17                                                                | 2.13E-01 | NS | 4.46E-01 | NS | 1.90E-02 | -2.4 |
| A_64_P003926  | XR_007267    | 500265    | LOC500265    | nucleoporin 50-like                                                                          | 9.61E-01 | NS | 2.24E-01 | NS | 2.74E-02 | -2.4 |
| A_64_P078185  | NM_001172845 | 287168    | Hbz          | hemoglobin, zeta                                                                             | 1.28E-01 | NS | 8.13E-01 | NS | 4.61E-02 | -2.4 |
| A_64_P055823  | XM_001056790 | 291423    | Setbp1       | SET binding protein 1                                                                        | 5.49E-01 | NS | 3.14E-01 | NS | 4.93E-03 | -2.4 |
| A_44_P1016829 | NM_023985    | 78969     | Trib1        | tribbles homolog 1 (Drosophila)                                                              | 1.56E-01 | NS | 7.39E-01 | NS | 2.02E-02 | -2.4 |
| A_64_P065912  | NM_001107218 | 305408    | Gpr125       | G protein-coupled receptor 125                                                               | 1.68E-01 | NS | 2.41E-01 | NS | 4.54E-03 | -2.4 |
| A_64_P099891  | NM_001110334 | 83785     | Vegfa        | vascular endothelial growth factor A                                                         | 2.00E-01 | NS | 8.36E-01 | NS | 6.12E-04 | -2.4 |
| A_64_P106968  | NM_001100770 | 366001    | Arrdc1       | arrestin domain containing 1                                                                 | 5.47E-02 | NS | 3.11E-01 | NS | 1.51E-02 | -2.4 |
| A_44_P419426  | NM_001146035 | 305355    | Tlr10        | toll-like receptor 10                                                                        | 2.78E-01 | NS | 9.47E-01 | NS | 4.98E-02 | -2.4 |
| A_64_P123603  | NM_138826    | 24567     | Mt1a         | metallothionein 1a                                                                           | 7.48E-01 | NS | 6.21E-01 | NS | 4.04E-02 | -2.4 |

|               |              |        |            |                                                                                                                        |          |    |          |    |          |      |
|---------------|--------------|--------|------------|------------------------------------------------------------------------------------------------------------------------|----------|----|----------|----|----------|------|
| A_64_P011854  | NM_001077651 | 432358 | Elavl4     | ELAV (embryonic lethal, abnormal vision, Drosophila)-like 4 (Hu antigen D)                                             | 1.38E-01 | NS | 9.38E-01 | NS | 2.75E-02 | -2.4 |
| A_44_P147396  | XM_001053920 | 296409 | Cass4      | Cas scaffolding protein family member 4                                                                                | 6.90E-02 | NS | 3.08E-01 | NS | 9.63E-03 | -2.4 |
| A_44_P1050809 | NM_001024909 | 500925 | MGC114464  | similar to expressed sequence A1836003                                                                                 | 9.89E-01 | NS | 7.92E-01 | NS | 2.48E-02 | -2.4 |
| A_64_P068594  | NM_001134841 | 298657 | Car6       | carbonic anhydrase 6                                                                                                   | 7.59E-02 | NS | 2.20E-01 | NS | 8.14E-03 | -2.4 |
| A_44_P133485  | NM_001108672 | 362564 | Bend5      | BEN domain containing 5                                                                                                | 9.37E-02 | NS | 5.24E-01 | NS | 3.27E-02 | -2.4 |
| A_64_P155920  | NM_053878    | 116657 | Cplx2      | complexin 2                                                                                                            | 5.44E-02 | NS | 4.43E-01 | NS | 1.34E-02 | -2.3 |
| A_64_P009527  | XM_001065498 |        |            |                                                                                                                        | 5.07E-01 | NS | 9.87E-01 | NS | 6.82E-03 | -2.3 |
| A_43_P11667   | NM_013029    | 25547  | St8sia3    | ST8 alpha-N-acetyl-neuraminide alpha-2,8-sialyltransferase 3                                                           | 2.85E-01 | NS | 8.12E-01 | NS | 4.07E-02 | -2.3 |
| A_64_P107190  | XM_001065910 |        |            |                                                                                                                        | 5.20E-02 | NS | 2.60E-01 | NS | 1.04E-03 | -2.3 |
| A_64_P044191  | NM_001106233 | 292706 | RGD1311676 | similar to RIKEN cDNA 1700008P20                                                                                       | 3.81E-01 | NS | 2.91E-01 | NS | 1.37E-02 | -2.3 |
| A_44_P426717  | NM_001106126 | 291354 | Enkur      | enkurin, TRPC channel interacting protein                                                                              | 2.01E-01 | NS | 5.58E-01 | NS | 4.09E-02 | -2.3 |
| A_44_P299598  | NM_001109880 | 24171  | Add2       | adducin 2 (beta)                                                                                                       | 2.59E-01 | NS | 1.95E-01 | NS | 1.90E-02 | -2.3 |
| A_64_P138328  | XM_341470    | 361188 | LOC361188  | similar to WD repeat domain 17                                                                                         | 6.81E-02 | NS | 7.66E-01 | NS | 2.02E-02 | -2.3 |
| A_64_P070706  | NM_001127452 | 294499 | RGD1305587 | similar to RIKEN cDNA 2010107G23                                                                                       | 2.74E-01 | NS | 4.87E-01 | NS | 3.63E-02 | -2.3 |
| A_64_P148550  | NM_053771    | 114903 | Lim2       | lens intrinsic membrane protein 2                                                                                      | 5.35E-01 | NS | 5.72E-01 | NS | 1.47E-02 | -2.3 |
| A_42_P791436  | NM_012750    | 25136  | Gfra2      | GDNF family receptor alpha 2                                                                                           | 2.47E-01 | NS | 6.08E-01 | NS | 2.26E-02 | -2.3 |
| A_64_P010353  | NM_001017468 | 365212 | Mill2      | MHC I like leukocyte 2                                                                                                 | 4.63E-01 | NS | 5.79E-01 | NS | 3.66E-03 | -2.3 |
| A_64_P139250  | NM_001047100 | 314636 | Tmprss9    | transmembrane protease, serine 9                                                                                       | 1.42E-01 | NS | 4.47E-01 | NS | 1.78E-02 | -2.3 |
| A_43_P15386   | NM_019622    | 56227  | Espn       | espin                                                                                                                  | 4.48E-01 | NS | 3.09E-01 | NS | 3.39E-02 | -2.3 |
| A_64_P083888  | NM_001013071 | 293888 | Tm7sf2     | transmembrane 7 superfamily member 2                                                                                   | 6.73E-02 | NS | 7.39E-01 | NS | 4.55E-02 | -2.3 |
| A_64_P060303  | NM_032616    | 64355  | Lsr        | lipolysis stimulated lipoprotein receptor similar to Glutathione S-transferase 8 (GST 8-8) (Chain 8) (GST class-alpha) | 2.07E-01 | NS | 3.97E-01 | NS | 3.43E-02 | -2.3 |
| A_64_P317212  | XM_576040    | 500661 | RGD1564906 | serine (or cysteine) peptidase inhibitor, clade B, member 6b                                                           | 7.87E-02 | NS | 1.97E-01 | NS | 3.40E-02 | -2.3 |
| A_42_P683837  | NM_001012214 | 364705 | Serpinb6b  | similar to T-cell activation Rho GTPase-activating protein isoform b                                                   | 5.83E-01 | NS | 1.61E-01 | NS | 1.92E-02 | -2.3 |
| A_64_P080894  | NM_001014252 | 365791 | LOC365791  | histone deacetylase 11                                                                                                 | 1.79E-01 | NS | 4.21E-01 | NS | 1.88E-02 | -2.3 |
| A_42_P493900  | NM_001106610 | 297453 | Hdac11     | olfactory receptor 1226                                                                                                | 2.75E-01 | NS | 6.95E-01 | NS | 3.52E-02 | -2.3 |
| A_64_P049659  | NM_001000442 | 300551 | Olr1226    | coxsackie virus and adenovirus receptor-like 1                                                                         | 5.85E-02 | NS | 9.53E-01 | NS | 3.21E-02 | -2.3 |
| A_64_P089170  | NM_199406    | 361873 | Cxadr1     | abhydrolase domain containing 14A                                                                                      | 1.25E-01 | NS | 5.72E-01 | NS | 1.82E-02 | -2.3 |
| A_64_P026828  | NM_001009670 | 300982 | Abhd14a    | fascin homolog 3, actin-bundling protein, testicular (Strongylocentrotus purpuratus)                                   | 1.54E-01 | NS | 4.60E-01 | NS | 1.55E-02 | -2.3 |
| A_44_P416738  | NM_001004232 | 296947 | Fscn3      | sperm acrosome associated 5                                                                                            | 4.04E-01 | NS | 3.87E-01 | NS | 3.28E-02 | -2.3 |
| A_43_P22761   | NM_001108058 | 314431 | Spaca5     | similar to TDPOZ3                                                                                                      | 4.81E-01 | NS | 4.32E-01 | NS | 2.91E-02 | -2.3 |
| A_64_P036576  | NM_001100985 | 365855 | RGD1563667 | carcinoembryonic antigen-related cell adhesion molecule 1 (biliary glycoprotein)                                       | 4.96E-01 | NS | 3.82E-01 | NS | 8.19E-03 | -2.3 |
| A_44_P538551  | NM_031755    | 81613  | Ceacam1    | PNMA-like 1                                                                                                            | 1.37E-01 | NS | 5.07E-02 | NS | 1.03E-02 | -2.2 |
| A_44_P365632  | NM_001108473 | 361515 | Pnmal1     | vomerolnasal 1 receptor, 36                                                                                            | 9.43E-01 | NS | 3.56E-01 | NS | 2.68E-02 | -2.2 |
| A_64_P055318  | NM_001008913 | 494264 | Vom1r36    | discs, large homolog 5 (Drosophila)                                                                                    | 9.25E-01 | NS | 1.57E-01 | NS | 2.53E-02 | -2.2 |
| A_64_P121836  | NM_001107247 | 305645 | Dlg5       | prolactin family 6, subfamily a, member 1                                                                              | 6.91E-02 | NS | 1.52E-01 | NS | 2.48E-02 | -2.2 |
| A_43_P14591   | NM_022176    | 24657  | Prl6a1     | desmoglein 2                                                                                                           | 3.66E-01 | NS | 9.35E-01 | NS | 6.61E-03 | -2.2 |
| A_64_P151592  | XM_229124    |        |            | metallothionein 2A                                                                                                     | 3.09E-01 | NS | 8.28E-01 | NS | 8.99E-04 | -2.2 |
| A_64_P092394  | XM_001054396 | 307562 | Dsg2       | protein tyrosine phosphatase, receptor type, F                                                                         | 2.75E-01 | NS | 1.13E-01 | NS | 4.26E-02 | -2.2 |
| A_64_P158939  | NM_001137564 | 689415 | Mt2A       | similar to Proteasome subunit alpha type 7-like                                                                        | 7.95E-01 | NS | 6.15E-01 | NS | 3.19E-02 | -2.2 |
| A_43_P11993   | NM_019249    | 360406 | Ptprf      | amyloid P component, serum                                                                                             | 1.73E-01 | NS | 5.05E-01 | NS | 1.46E-02 | -2.2 |
| A_64_P124080  | NM_001108884 | 364814 | RGD1311659 | nuclear receptor subfamily 1, group H, member 4                                                                        | 6.68E-02 | NS | 7.61E-01 | NS | 4.81E-02 | -2.2 |
| A_44_P437966  | NM_017170    | 29339  | Apcs       | alcohol dehydrogenase 4 (class II), pi polypeptide                                                                     | 1.90E-01 | NS | 2.08E-01 | NS | 1.52E-03 | -2.2 |
| A_64_P162764  | FQ220235     |        |            | secretin                                                                                                               | 9.52E-01 | NS | 6.71E-01 | NS | 4.44E-02 | -2.2 |
| A_64_P128653  | NM_021745    | 60351  | Nr1h4      |                                                                                                                        | 7.94E-01 | NS | 3.39E-01 | NS | 1.90E-02 | -2.2 |
| A_64_P164726  | NM_017270    | 29646  | Adh4       |                                                                                                                        | 6.71E-01 | NS | 9.12E-01 | NS | 1.26E-02 | -2.2 |
| A_44_P529904  | XM_001071606 | 361275 | Bend7      | BEN domain containing 7                                                                                                | 9.14E-01 | NS | 5.59E-01 | NS | 7.85E-04 | -2.2 |
| A_64_P002730  | NM_001077677 | 499021 | Pacrg      | Park2 co-regulated                                                                                                     | 5.97E-01 | NS | 5.13E-01 | NS | 1.26E-02 | -2.2 |
| A_43_P15427   | M31495       | 24769  | Sct        |                                                                                                                        | 7.03E-02 | NS | 1.01E-01 | NS | 1.59E-02 | -2.2 |

|               |              |           |              |                                                                                                                 |          |    |          |    |          |      |
|---------------|--------------|-----------|--------------|-----------------------------------------------------------------------------------------------------------------|----------|----|----------|----|----------|------|
| A_44_P932103  | XM_001062176 | 685074    | LOC685074    | hypothetical protein LOC685074                                                                                  | 5.32E-01 | NS | 8.87E-01 | NS | 4.68E-03 | -2.2 |
| A_44_P135277  | NM_031753    | 79559     | Alcam        | activated leukocyte cell adhesion molecule                                                                      | 8.07E-01 | NS | 9.41E-01 | NS | 8.73E-03 | -2.2 |
| A_64_P001354  | CB547247     |           |              |                                                                                                                 | 4.05E-01 | NS | 4.21E-01 | NS | 2.20E-02 | -2.2 |
| A_42_P711139  | NM_012541    | 24297     | Cyp1a2       | cytochrome P450, family 1, subfamily a, polypeptide 2                                                           | 5.86E-02 | NS | 1.52E-01 | NS | 2.43E-02 | -2.2 |
| A_64_P160091  | XM_001073569 | 501049    | RGD1560166   | similar to Probable G-protein coupled receptor 62 (hGPCR8)                                                      | 1.84E-01 | NS | 2.62E-01 | NS | 1.38E-03 | -2.2 |
| A_64_P106021  | XM_001078158 |           |              |                                                                                                                 | 3.96E-01 | NS | 9.58E-01 | NS | 3.60E-02 | -2.2 |
| A_64_P121722  | NM_001106215 | 292401    | Smoc2        | SPARC related modular calcium binding 2                                                                         | 9.61E-01 | NS | 3.28E-01 | NS | 3.69E-02 | -2.2 |
| A_64_P074460  | BF564780     |           |              |                                                                                                                 | 1.79E-01 | NS | 1.16E-01 | NS | 3.77E-02 | -2.2 |
| A_44_P529426  | NM_021687    | 59323     | ErbB4        | v-erb-a erythroblastic leukemia viral oncogene homolog 4 (avian)                                                | 3.19E-01 | NS | 9.54E-01 | NS | 3.10E-02 | -2.2 |
| A_43_P11437   | NM_012503    | 24210     | Asgr1        | asialoglycoprotein receptor 1                                                                                   | 1.12E-01 | NS | 8.24E-02 | NS | 4.53E-02 | -2.2 |
| A_64_P135718  | NM_001008969 | 494312    | Vom1r31      | vomeronal 1 receptor, 31                                                                                        | 6.56E-01 | NS | 1.42E-01 | NS | 3.92E-02 | -2.2 |
| A_44_P332545  | NM_001000182 | 293329    | Olr184       | olfactory receptor 184                                                                                          | 2.55E-01 | NS | 6.92E-01 | NS | 2.79E-02 | -2.2 |
| A_64_P050079  | NM_001134998 | 100188984 | LOC100188984 | hypothetical protein LOC100188984                                                                               | 5.09E-01 | NS | 5.39E-01 | NS | 2.38E-02 | -2.2 |
| A_64_P002299  | NM_001000811 | 405097    | Olr1239      | olfactory receptor 1239                                                                                         | 6.24E-01 | NS | 8.24E-01 | NS | 2.60E-02 | -2.2 |
| A_43_P12841   | NM_053535    | 85496     | Enpp1        | ectonucleotide pyrophosphatase/phosphodiesterase 1 family with sequence similarity 84, member B                 | 1.47E-01 | NS | 4.78E-01 | NS | 1.81E-02 | -2.2 |
| A_64_P143952  | XM_001065586 | 315019    | Fam84b       |                                                                                                                 | 7.64E-02 | NS | 3.18E-01 | NS | 2.17E-02 | -2.2 |
| A_64_P127253  | NM_001099647 | 685045    | LOC685045    | similar to Protein C6orf115                                                                                     | 4.65E-01 | NS | 9.12E-01 | NS | 1.62E-02 | -2.2 |
| A_64_P017268  | XM_001072398 | 689889    | LOC689889    | hypothetical protein LOC689889                                                                                  | 6.10E-02 | NS | 3.85E-01 | NS | 1.94E-02 | -2.2 |
| A_42_P758052  | NM_001031645 | 295305    | Acp6         | acid phosphatase 6, lysophosphatidic                                                                            | 1.42E-01 | NS | 9.87E-02 | NS | 4.23E-02 | -2.2 |
| A_64_P313970  | NM_013219    | 26989     | Cadps        | Ca++-dependent secretion activator                                                                              | 1.40E-01 | NS | 6.80E-01 | NS | 2.46E-02 | -2.2 |
| A_64_P261728  | XM_001064404 |           |              |                                                                                                                 | 7.01E-01 | NS | 7.77E-01 | NS | 4.87E-02 | -2.2 |
| A_64_P053431  | NM_001107491 | 308436    | Cxcl17       | chemokine (C-X-C motif) ligand 17                                                                               | 7.63E-01 | NS | 4.41E-01 | NS | 8.63E-03 | -2.2 |
| A_64_P158024  | NM_001008957 | 299649    | Vom1r108     | vomeronal 1 receptor, 108                                                                                       | 8.42E-01 | NS | 5.83E-01 | NS | 4.13E-02 | -2.2 |
| A_64_P145178  | XR_006338    |           |              |                                                                                                                 | 4.41E-01 | NS | 9.84E-01 | NS | 4.27E-02 | -2.2 |
| A_44_P218305  | NM_001013120 | 303926    | IgSF11       | immunoglobulin superfamily, member 11 forkhead box E1 (thyroid transcription factor 2)                          | 2.97E-01 | NS | 5.86E-01 | NS | 4.78E-03 | -2.2 |
| A_64_P075928  | NM_138909    | 192274    | Foxe1        | similar to Leukosialin precursor (Leucocyte sialoglycoprotein) (Sialophorin) (CD43) (W3/13 antigen)             | 8.67E-02 | NS | 4.76E-01 | NS | 1.33E-02 | -2.2 |
| A_64_P058594  | NM_001013868 | 288521    | LOC288521    |                                                                                                                 | 6.74E-01 | NS | 1.89E-01 | NS | 2.90E-02 | -2.2 |
| A_44_P481381  | NM_012491    | 24171     | Add2         | adducin 2 (beta)                                                                                                | 7.88E-01 | NS | 3.21E-01 | NS | 3.67E-02 | -2.1 |
| A_44_P1043302 | NM_001025661 | 301112    | Crb3         | crumbs homolog 3 (Drosophila)                                                                                   | 1.26E-01 | NS | 5.02E-02 | NS | 1.97E-02 | -2.1 |
| A_44_P131325  | XM_002727925 | 288106    | RGD1566314   | similar to KIAA1407                                                                                             | 8.34E-02 | NS | 9.52E-01 | NS | 1.02E-03 | -2.1 |
| A_43_P10290   | NM_001004236 | 298436    | Tspan1       | tetraspanin 1                                                                                                   | 2.59E-01 | NS | 2.09E-01 | NS | 8.78E-03 | -2.1 |
| A_64_P114465  | NM_053459    | 84590     | Rab27b       | RAB27B, member RAS oncogene family pleckstrin homology domain containing, family H (with MyTH4 domain) member 1 | 5.03E-02 | NS | 8.23E-01 | NS | 1.32E-02 | -2.1 |
| A_44_P884935  | NM_001108036 | 314262    | Plekhh1      | similar to SRY (sex determining region Y)-box 5 isoform a                                                       | 6.95E-01 | NS | 3.38E-01 | NS | 3.81E-02 | -2.1 |
| A_64_P024321  | NM_001014060 | 312831    | LOC312831    | potassium voltage gated channel, Shaw-related subfamily, member 3                                               | 1.29E-01 | NS | 7.98E-01 | NS | 2.82E-02 | -2.1 |
| A_64_P081357  | M84210       | 117101    | Kcnc3        | family with sequence similarity 71, member A                                                                    | 2.86E-01 | NS | 1.23E-01 | NS | 4.59E-02 | -2.1 |
| A_64_P033735  | NM_001109084 | 498311    | Fam71a       |                                                                                                                 | 3.56E-01 | NS | 2.38E-01 | NS | 4.32E-02 | -2.1 |
| A_64_P034666  | NM_001001281 | 365327    | Olr75        | olfactory receptor 75                                                                                           | 8.64E-02 | NS | 7.06E-01 | NS | 1.34E-02 | -2.1 |
| A_64_P105713  | NM_153310    | 266680    | St18         | suppression of tumorigenicity 18                                                                                | 1.26E-01 | NS | 3.06E-01 | NS | 3.80E-02 | -2.1 |
| A_64_P047034  | XM_002728944 |           |              |                                                                                                                 | 2.13E-01 | NS | 2.14E-01 | NS | 2.33E-02 | -2.1 |
| A_64_P071740  | BC081976     | 303823    | Map3k13      | mitogen-activated protein kinase kinase kinase 13                                                               | 1.10E-01 | NS | 6.24E-01 | NS | 3.83E-02 | -2.1 |
| A_64_P030362  | NM_001105868 | 287989    | Ephb3        | Eph receptor B3                                                                                                 | 2.11E-01 | NS | 1.25E-01 | NS | 4.75E-02 | -2.1 |
| A_64_P134124  | NM_022296    | 64134     | Xylt2        | xylosyltransferase II                                                                                           | 1.06E-01 | NS | 9.40E-01 | NS | 3.96E-02 | -2.1 |
| A_64_P003054  | NM_198749    | 299156    | Rab15        | RAB15, member RAS oncogene family                                                                               | 1.57E-01 | NS | 1.12E-01 | NS | 1.55E-02 | -2.1 |
| A_64_P058955  | NM_001037518 | 641621    | Defb23       | defensin beta 23                                                                                                | 9.78E-01 | NS | 7.03E-01 | NS | 2.80E-02 | -2.1 |
| A_44_P478319  | XM_002730179 |           |              |                                                                                                                 | 5.80E-02 | NS | 1.53E-01 | NS | 2.92E-02 | -2.1 |
| A_64_P150256  | NM_001024791 | 360605    | Epn3         | epsin 3                                                                                                         | 1.14E-01 | NS | 5.63E-02 | NS | 9.61E-03 | -2.1 |

|              |              |        |            |                                                                                                                             |          |    |          |    |          |      |
|--------------|--------------|--------|------------|-----------------------------------------------------------------------------------------------------------------------------|----------|----|----------|----|----------|------|
| A_42_P517083 | FQ212560     |        |            |                                                                                                                             | 1.72E-01 | NS | 3.56E-01 | NS | 3.02E-02 | -2.1 |
| A_64_P066206 | NM_017158    | 29298  | Cyp2c7     | cytochrome P450, family 2, subfamily c, polypeptide 7                                                                       | 9.11E-01 | NS | 5.85E-01 | NS | 4.60E-02 | -2.1 |
| A_64_P046233 | XM_001077379 | 307845 | Mtss1l     | metastasis suppressor 1-like                                                                                                | 6.01E-01 | NS | 6.88E-02 | NS | 2.47E-02 | -2.1 |
| A_64_P115065 | NM_001109631 | 691215 | LOC691215  | hypothetical protein LOC691215                                                                                              | 8.18E-01 | NS | 5.51E-01 | NS | 4.87E-03 | -2.1 |
| A_64_P011594 | NM_031036    | 81666  | Gnaq       | polypeptide                                                                                                                 | 1.48E-01 | NS | 8.40E-01 | NS | 1.04E-03 | -2.1 |
| A_44_P448051 | NM_001108930 | 365550 | Vpreb3     | pre-B lymphocyte 3                                                                                                          | 1.75E-01 | NS | 1.69E-01 | NS | 3.72E-02 | -2.1 |
| A_64_P001424 | XM_002724653 |        |            |                                                                                                                             | 3.98E-01 | NS | 3.61E-01 | NS | 3.47E-03 | -2.1 |
| A_64_P028190 | NM_001107282 | 306127 | Irg1       | immunoresponsive 1 homolog (mouse)                                                                                          | 6.35E-01 | NS | 1.26E-01 | NS | 4.07E-02 | -2.1 |
| A_42_P545943 | NM_019291    | 54231  | Car2       | carbonic anhydrase II                                                                                                       | 1.12E-01 | NS | 5.29E-01 | NS | 4.49E-02 | -2.1 |
| A_64_P096234 | NM_001105850 | 287819 | Ush1g      | Usher syndrome 1G homolog (human) similar to Probable phospholipid-transporting ATPase ID (ATPase class I type 8B member 2) | 9.74E-02 | NS | 3.57E-01 | NS | 9.95E-04 | -2.1 |
| A_43_P14700  | XM_001076905 | 691125 | LOC691125  |                                                                                                                             | 6.44E-02 | NS | 7.37E-01 | NS | 4.02E-02 | -2.1 |
| A_64_P051159 | NM_001100684 | 305450 | Sh3bp2     | SH3-domain binding protein 2                                                                                                | 7.04E-01 | NS | 5.31E-01 | NS | 1.53E-02 | -2.1 |
| A_64_P034809 | NM_001000105 | 291161 | Olr1658    | olfactory receptor 1658 family with sequence similarity 71, member E1                                                       | 5.22E-01 | NS | 7.37E-01 | NS | 7.50E-03 | -2.1 |
| A_44_P461587 | XM_341847    | 361564 | Fam71e1    |                                                                                                                             | 3.54E-01 | NS | 8.02E-01 | NS | 2.22E-02 | -2.1 |
| A_64_P158708 | AI060108     |        |            |                                                                                                                             | 4.24E-01 | NS | 9.19E-01 | NS | 3.22E-02 | -2.1 |
| A_64_P142470 | XM_001062396 |        |            |                                                                                                                             | 8.89E-02 | NS | 4.46E-01 | NS | 1.37E-03 | -2.1 |
| A_64_P043619 | NM_138854    | 192208 | Slc38a5    | solute carrier family 38, member 5                                                                                          | 1.03E-01 | NS | 2.69E-01 | NS | 1.53E-02 | -2.1 |
| A_64_P019891 | XM_002726660 | 500588 | RGD1560626 | RGD1560626                                                                                                                  | 5.93E-01 | NS | 5.83E-01 | NS | 3.27E-02 | -2.1 |
| A_43_P12827  | NM_053507    | 85269  | Nme3       | non-metastatic cells 3, protein expressed in similar to spermatogenesis associated                                          | 5.74E-02 | NS | 1.86E-01 | NS | 2.97E-02 | -2.0 |
| A_64_P107529 | XM_002725430 | 685411 | LOC685411  | glutamate (E)-rich protein 4b bruno-like 5, RNA binding protein (Drosophila)                                                | 5.97E-01 | NS | 9.00E-02 | NS | 3.04E-02 | -2.0 |
| A_44_P180696 | NM_001135603 | 314647 | Bruno15    |                                                                                                                             | 9.92E-01 | NS | 1.61E-01 | NS | 2.37E-02 | -2.0 |
| A_64_P267691 | XM_002725715 |        |            |                                                                                                                             | 3.49E-01 | NS | 1.37E-01 | NS | 3.11E-02 | -2.0 |
| A_64_P063953 | NM_001012092 | 311549 | Xkr7       | XK, Kell blood group complex subunit-related family, member 7                                                               | 2.57E-01 | NS | 6.52E-01 | NS | 5.58E-03 | -2.0 |
| A_64_P030287 | NM_173333    | 287000 | Olr1361    | olfactory receptor 1361                                                                                                     | 8.72E-01 | NS | 9.68E-01 | NS | 1.99E-02 | -2.0 |
| A_64_P029902 | XM_001055778 | 679314 | LOC679314  | hypothetical protein LOC679314                                                                                              | 2.46E-01 | NS | 7.94E-01 | NS | 3.52E-02 | -2.0 |
| A_64_P133021 | XM_001072026 | 689795 | LOC689795  | hypothetical protein LOC689795                                                                                              | 9.72E-01 | NS | 1.01E-01 | NS | 4.24E-02 | -2.0 |
| A_64_P080374 | XM_220888    | 24457  | Hoxb8      | homeo box B8                                                                                                                | 3.21E-01 | NS | 8.59E-01 | NS | 3.44E-02 | -2.0 |
| A_64_P119896 | NM_001014784 | 297795 | Npbwr1     | neuropeptides B/W receptor 1                                                                                                | 6.13E-01 | NS | 1.20E-01 | NS | 2.17E-02 | -2.0 |
| A_64_P038783 | XM_001074018 | 365063 | RGD1560695 | similar to hypothetical protein 4930474N05 ATP-binding cassette, sub-family A (ABC1), member 6                              | 2.11E-01 | NS | 8.46E-01 | NS | 1.01E-02 | -2.0 |
| A_44_P222981 | XM_001081607 | 303639 | Abca6      | inositol polyphosphate-4-phosphatase, type 1                                                                                | 6.20E-01 | NS | 3.08E-01 | NS | 2.53E-02 | -2.0 |
| A_44_P224705 | NM_031002    | 80849  | Inpp4a     |                                                                                                                             | 8.14E-01 | NS | 4.53E-01 | NS | 5.31E-03 | -2.0 |
| A_64_P090674 | XM_001063315 |        |            |                                                                                                                             | 2.42E-01 | NS | 5.72E-01 | NS | 1.71E-03 | -2.0 |
| A_64_P008468 | NM_001000240 | 293603 | Olr305     | olfactory receptor 305                                                                                                      | 9.27E-01 | NS | 5.56E-01 | NS | 1.75E-02 | -2.0 |
| A_43_P10989  | NM_012525    | 24257  | Cgm4       | carcinoembryonic antigen gene family 4 DEAH (Asp-Glu-Ala-His) box polypeptide 32                                            | 6.30E-01 | NS | 1.31E-01 | NS | 4.94E-02 | -2.0 |
| A_44_P282843 | NM_001130039 | 361667 | Dhx32      |                                                                                                                             | 2.18E-01 | NS | 1.02E-01 | NS | 3.35E-02 | -2.0 |
| A_64_P035972 | NM_031096    | 81760  | Grk1       | G protein-coupled receptor kinase 1                                                                                         | 8.21E-01 | NS | 3.88E-01 | NS | 1.09E-02 | -2.0 |
| A_44_P592077 | NM_001107378 | 307296 | Znf608     | zinc finger protein 608                                                                                                     | 4.87E-01 | NS | 3.60E-01 | NS | 3.91E-04 | -2.0 |
| A_64_P271601 | XM_002726257 |        |            |                                                                                                                             | 4.54E-01 | NS | 4.42E-01 | NS | 3.13E-02 | -2.0 |
| A_44_P500975 | NM_001000833 | 405122 | Olr1639    | olfactory receptor 1639 glucosaminyl (N-acetyl) transferase 1, core 2 (beta-1,6-N-acetylglucosaminyltransferase)            | 2.97E-01 | NS | 7.53E-02 | NS | 6.07E-03 | -2.0 |
| A_64_P038462 | NM_022276    | 64043  | Gcnt1      |                                                                                                                             | 6.67E-01 | NS | 8.19E-01 | NS | 2.48E-03 | -2.0 |
| A_44_P549028 | XM_342337    |        |            |                                                                                                                             | 2.40E-01 | NS | 8.07E-01 | NS | 1.17E-02 | -2.0 |
| A_44_P240790 | NM_001000258 | 293803 | Olr371     | olfactory receptor 371                                                                                                      | 8.47E-01 | NS | 5.07E-01 | NS | 3.29E-02 | -2.0 |
| A_64_P081987 | NM_001039609 | 310839 | Frbp1l     | formin binding protein 1-like similar to testicular haploid expressed gene product isoform 2                                | 1.99E-01 | NS | 6.87E-01 | NS | 1.46E-02 | -2.0 |
| A_64_P098739 | NM_001017498 | 498350 | LOC498350  |                                                                                                                             | 9.77E-01 | NS | 4.74E-01 | NS | 2.93E-02 | -2.0 |

|               |              |           |              |                                                                                                             |          |    |          |    |          |      |
|---------------|--------------|-----------|--------------|-------------------------------------------------------------------------------------------------------------|----------|----|----------|----|----------|------|
| A_64_P035488  | NM_001000340 | 295852    | Olr639       | olfactory receptor 639                                                                                      | 5.41E-01 | NS | 1.72E-01 | NS | 3.86E-03 | -2.0 |
| A_64_P013018  | NM_013066    | 25595     | Map2         | microtubule-associated protein 2                                                                            | 1.77E-01 | NS | 7.10E-01 | NS | 3.77E-02 | -2.0 |
| A_44_P445444  | NM_001009706 | 361663    | Lhpp         | pyrophosphate phosphatase                                                                                   | 5.34E-02 | NS | 5.15E-02 | NS | 3.90E-02 | -2.0 |
| A_44_P262199  | NM_00100533  | 364054    | Olr1581      | olfactory receptor 1581                                                                                     | 4.61E-01 | NS | 6.92E-01 | NS | 4.32E-03 | -2.0 |
| A_64_P055117  | NM_001107286 | 306164    | Tgds         | TDP-glucose 4,6-dehydratase                                                                                 | 4.31E-01 | NS | 4.79E-01 | NS | 2.98E-02 | -2.0 |
| A_64_P059675  | NM_001014251 | 365778    | LOC365778    | similar to RIKEN cDNA 1700034123                                                                            | 5.70E-01 | NS | 6.62E-01 | NS | 1.68E-02 | -2.0 |
| A_64_P025912  | NM_001108750 | 362988    | Cpne8        | copine VIII                                                                                                 | 2.87E-01 | NS | 9.04E-01 | NS | 2.38E-02 | -2.0 |
| A_64_P126744  | NM_001025662 | 301165    | LOC301165    | similar to hypothetical protein 4932415M13                                                                  | 6.22E-01 | NS | 1.36E-01 | NS | 1.40E-02 | -2.0 |
| A_64_P099893  | NM_001110334 | 83785     | Vegfa        | vascular endothelial growth factor A                                                                        | 4.23E-01 | NS | 6.10E-01 | NS | 2.92E-03 | -2.0 |
| A_64_P062670  | NM_001107504 | 308511    | Chst8        | carbohydrate (N-acetylgalactosamine 4-0) sulfotransferase 8                                                 | 6.88E-01 | NS | 4.17E-01 | NS | 1.83E-02 | -2.0 |
| A_44_P1019096 | XM_001081122 | 362212    | Tmem87b      | transmembrane protein 87B                                                                                   | 6.53E-01 | NS | 3.67E-01 | NS | 8.10E-03 | -2.0 |
| A_64_P120564  | NM_001025765 | 498945    | Zfp90        | zinc finger protein 90                                                                                      | 3.00E-01 | NS | 8.29E-01 | NS | 4.87E-02 | -2.0 |
| A_64_P120520  | XM_229383    | 291345    | RGD1561231   | similar to MAP/microtubule affinity-regulating kinase 4 (MAP/microtubule affinity-regulating kinase like 1) | 9.52E-01 | NS | 4.21E-01 | NS | 2.60E-02 | -2.0 |
| A_44_P993359  | BF564301     |           |              |                                                                                                             | 4.60E-01 | NS | 7.72E-01 | NS | 2.90E-02 | -2.0 |
| A_64_P015007  | XM_001070151 | 684385    | LOC684385    | similar to unc-93 homolog A                                                                                 | 4.90E-01 | NS | 6.26E-01 | NS | 1.74E-02 | -2.0 |
| A_64_P009549  | XM_001065467 |           |              |                                                                                                             | 2.02E-01 | NS | 2.98E-01 | NS | 1.41E-02 | -2.0 |
| A_64_P067938  | DV718677     |           |              |                                                                                                             | 2.57E-01 | NS | 4.92E-01 | NS | 2.88E-02 | -2.0 |
| A_64_P004526  | XM_001054568 | 498412    | Sunc1        | Sad1 and UNC84 domain containing 1                                                                          | 6.74E-01 | NS | 3.93E-01 | NS | 1.12E-02 | -2.0 |
| A_44_P915877  | XM_001065403 | 683460    | LOC683460    | hypothetical protein LOC683460                                                                              | 1.66E-01 | NS | 8.64E-01 | NS | 1.02E-02 | -2.0 |
| A_64_P115405  | NM_001134571 | 361066    | RGD1308117   | similar to 9930012K11Rik protein                                                                            | 5.91E-01 | NS | 7.86E-01 | NS | 1.15E-02 | -2.0 |
| A_44_P140465  | XM_001074315 |           |              |                                                                                                             | 1.85E-01 | NS | 1.84E-01 | NS | 1.02E-02 | -2.0 |
| A_64_P092015  | XR_006242    | 685615    | LOC685615    | hypothetical protein LOC685615                                                                              | 3.10E-01 | NS | 9.50E-01 | NS | 4.52E-02 | -2.0 |
| A_64_P034793  | NM_001000725 | 404978    | Olr1558      | olfactory receptor 1558                                                                                     | 7.15E-01 | NS | 1.12E-01 | NS | 2.26E-04 | -2.0 |
| A_44_P437945  | NM_173837    | 317673    | Bbc3         | Bcl-2 binding component 3                                                                                   | 7.02E-01 | NS | 8.45E-01 | NS | 4.34E-02 | -2.0 |
| A_64_P096589  | XM_580084    | 500568    | RGD1564482   | RGD1564482                                                                                                  | 4.57E-01 | NS | 1.03E-01 | NS | 3.71E-02 | -2.0 |
| A_43_P21729   | XM_001058786 | 686314    | LOC686314    | similar to dachshund b                                                                                      | 1.27E-01 | NS | 1.38E-01 | NS | 6.89E-03 | -2.0 |
| A_64_P121841  | NM_001107247 | 305645    | Dlg5         | discs, large homolog 5 (Drosophila)                                                                         | 5.66E-01 | NS | 2.25E-01 | NS | 5.10E-03 | -2.0 |
| A_64_P086775  | NM_001008971 | 497787    | Vom1r93      | vomeroneasal 1 receptor, 93                                                                                 | 1.41E-01 | NS | 1.80E-01 | NS | 3.58E-03 | -2.0 |
| A_64_P074940  | NM_139263    | 246174    | Fgd4         | FYVE, RhoGEF and PH domain containing 4                                                                     | 5.12E-01 | NS | 7.94E-01 | NS | 1.88E-03 | -2.0 |
| A_64_P145433  | XM_346769    |           |              |                                                                                                             | 4.72E-01 | NS | 2.57E-01 | NS | 2.50E-03 | -2.0 |
| A_64_P157820  | XM_001079095 | 691632    | LOC691632    | similar to MIC2 like 1                                                                                      | 2.93E-01 | NS | 1.81E-01 | NS | 4.42E-03 | -2.0 |
| A_64_P080105  | NM_001105855 |           |              |                                                                                                             | 4.00E-01 | NS | 1.12E-01 | NS | 4.76E-02 | -2.0 |
| A_44_P451638  | NM_053473    | 84685     | Ppp1r9a      | protein phosphatase 1, regulatory (inhibitor) subunit 9A                                                    | 7.11E-01 | NS | 7.79E-01 | NS | 3.60E-04 | -2.0 |
| A_64_P136714  | NM_001001970 | 415062    | Ly6g6d       | lymphocyte antigen 6 complex, locus G6D                                                                     | 2.56E-01 | NS | 6.79E-01 | NS | 1.24E-03 | -2.0 |
| A_64_P082341  | NM_053715    | 114507    | Slc5a3       | solute carrier family 5 (inositol transporters), member 3                                                   | 6.75E-01 | NS | 9.28E-01 | NS | 3.66E-02 | -2.0 |
| A_64_P106276  | XM_002727821 | 100361389 | LOC100361389 | hypothetical protein LOC100361389                                                                           | 8.90E-02 | NS | 8.41E-01 | NS | 8.21E-04 | -2.0 |
| A_64_P152252  | NM_001107072 | 303741    | Fscn2        | fascin homolog 2, actin-bundling protein, retinal (Strongylocentrotus purpuratus)                           | 1.74E-01 | NS | 7.95E-01 | NS | 3.60E-02 | -2.0 |
| A_64_P155885  | XM_001065314 | 361342    | Cplx4        | complexin 4                                                                                                 | 4.85E-01 | NS | 9.15E-02 | NS | 1.36E-02 | -2.0 |
| A_44_P999507  | NM_001100499 | 287925    | Pkp2         | plakophilin 2                                                                                               | 3.75E-01 | NS | 2.93E-01 | NS | 8.84E-03 | -2.0 |
| A_44_P409493  | NM_023962    | 66018     | Pdgfd        | platelet-derived growth factor, D polypeptide                                                               | 1.17E-01 | NS | 8.06E-02 | NS | 3.79E-02 | -1.9 |
| A_42_P816878  | NM_001012347 | 294715    | Rgs7bp       | regulator of G-protein signaling 7 binding protein                                                          | 6.75E-01 | NS | 4.27E-01 | NS | 4.83E-03 | -1.9 |
| A_43_P22744   | NM_001106980 | 302950    | Adcy9        | adenylate cyclase 9                                                                                         | 6.42E-01 | NS | 6.07E-01 | NS | 3.22E-02 | -1.9 |
| A_64_P089610  | NM_001106589 | 296968    | RGD1308226   | similar to hypothetical protein FLJ32786                                                                    | 5.07E-02 | NS | 1.27E-01 | NS | 5.03E-03 | -1.9 |
| A_64_P018681  | NM_031075    | 81739     | P2rx3        | purinergic receptor P2X, ligand-gated ion channel, 3                                                        | 7.80E-02 | NS | 4.19E-01 | NS | 2.05E-02 | -1.9 |
| A_44_P375500  | XM_216738    | 299151    | Syne2        | spectrin repeat containing, nuclear envelope 2                                                              | 2.38E-01 | NS | 9.96E-01 | NS | 4.31E-03 | -1.9 |
| A_43_P20194   | NM_001011935 | 293476    | Xpo6         | exportin 6                                                                                                  | 4.67E-01 | NS | 4.98E-01 | NS | 4.40E-02 | -1.9 |



|              |              |        |            |                                                                                 |          |    |          |    |          |      |
|--------------|--------------|--------|------------|---------------------------------------------------------------------------------|----------|----|----------|----|----------|------|
| A_64_P086507 | XM_001079904 |        |            |                                                                                 | 1.52E-01 | NS | 9.11E-01 | NS | 4.20E-02 | -1.9 |
| A_43_P11686  | NM_013062    | 25589  | Kdr        | kinase insert domain receptor                                                   | 6.86E-02 | NS | 7.79E-01 | NS | 4.23E-03 | -1.9 |
| A_64_P010028 | CB782641     | 685253 | LOC685253  | hypothetical protein LOC685253<br>FYVE, RhoGEF and PH domain containing 4       | 2.45E-01 | NS | 7.18E-01 | NS | 5.39E-03 | -1.9 |
| A_44_P244257 | NM_139263    | 246174 | Fgd4       | protocadherin 9                                                                 | 1.64E-01 | NS | 3.99E-01 | NS | 1.68E-02 | -1.9 |
| A_44_P520441 | XM_002728302 | 306091 | Pcdh9      | cysteine and histidine rich 1                                                   | 5.56E-01 | NS | 9.21E-01 | NS | 2.36E-02 | -1.9 |
| A_64_P122735 | NM_001025122 | 315097 | Cyhr1      | hypothetical LOC313936                                                          | 1.98E-01 | NS | 5.39E-01 | NS | 9.36E-03 | -1.9 |
| A_44_P227409 | NM_001014074 | 313936 | LOC313936  | kazrin                                                                          | 3.93E-01 | NS | 9.58E-01 | NS | 4.00E-02 | -1.9 |
| A_44_P699644 | NM_001014070 | 313672 | LOC313672  | wingless-type MMTV integration site family, member 11                           | 5.05E-02 | NS | 1.64E-01 | NS | 3.50E-02 | -1.9 |
| A_64_P092744 | NM_080401    | 140584 | Wnt11      | villin-like                                                                     | 4.92E-01 | NS | 6.70E-01 | NS | 3.03E-02 | -1.9 |
| A_44_P431661 | XM_217296    | 301057 | Vill       | cathepsin L-like 3                                                              | 1.17E-01 | NS | 8.28E-01 | NS | 4.97E-02 | -1.9 |
| A_64_P097872 | XM_001065834 | 498691 | Ctsl3      | hypothetical protein LOC681343                                                  | 9.14E-02 | NS | 2.56E-01 | NS | 1.81E-03 | -1.9 |
| A_64_P060879 | XM_001061349 | 681343 | LOC681343  | olfactory receptor 401                                                          | 8.02E-01 | NS | 6.37E-01 | NS | 3.75E-02 | -1.9 |
| A_44_P552594 | NM_001000829 | 405118 | Olr401     | fibronectin type III domain containing 3a                                       | 4.71E-01 | NS | 3.16E-01 | NS | 2.34E-02 | -1.9 |
| A_64_P053297 | NM_001107278 | 306022 | Fndc3a     | megalencephalic leukoencephalopathy with subcortical cysts 1 homolog (human)    | 8.00E-02 | NS | 5.00E-01 | NS | 4.01E-02 | -1.9 |
| A_44_P208857 | NM_001108105 | 315215 | Mlc1       | ectodermal-neural cortex 1                                                      | 7.21E-01 | NS | 2.55E-01 | NS | 3.97E-04 | -1.9 |
| A_42_P780457 | NM_001003401 | 294674 | Enc1       |                                                                                 | 3.37E-01 | NS | 1.93E-01 | NS | 5.62E-03 | -1.9 |
| A_64_P030909 | NM_001107023 | 303337 | Rab11fp4   | RAB11 family interacting protein 4 (class II)                                   | 9.35E-02 | NS | 5.60E-01 | NS | 1.88E-02 | -1.9 |
| A_64_P133608 | XM_228129    |        |            |                                                                                 | 1.39E-01 | NS | 3.12E-01 | NS | 3.57E-02 | -1.9 |
| A_64_P016751 | NM_001109219 | 499990 | RGD1562351 | similar to chromosome 7 open reading frame 23                                   | 9.76E-01 | NS | 2.90E-01 | NS | 3.59E-02 | -1.9 |
| A_44_P135864 | XM_001075304 | 300386 | Ubtfl1     | upstream binding transcription factor, RNA polymerase I-like 1                  | 5.31E-01 | NS | 3.95E-01 | NS | 4.67E-02 | -1.9 |
| A_64_P073023 | XM_001062720 | 499583 | Naaladl2   | N-acetylated alpha-linked acidic dipeptidase-like 2                             | 1.19E-01 | NS | 9.88E-02 | NS | 2.72E-02 | -1.9 |
| A_64_P140956 | NM_001013141 | 307547 | Zfp35      | zinc finger protein 35                                                          | 2.97E-01 | NS | 7.50E-01 | NS | 1.80E-02 | -1.9 |
| A_64_P083334 | FQ224293     |        |            |                                                                                 | 5.82E-02 | NS | 8.91E-01 | NS | 2.30E-03 | -1.9 |
| A_64_P399184 | NM_013070    | 25600  | Utrn       | utrophin                                                                        | 7.93E-01 | NS | 5.73E-01 | NS | 6.51E-03 | -1.9 |
| A_64_P072973 | NM_133603    | 171138 | Kcne2      | potassium voltage-gated channel, Isk-related subfamily, gene 2                  | 7.73E-01 | NS | 4.51E-01 | NS | 2.22E-02 | -1.9 |
| A_64_P106051 | NM_001134601 | 498004 | RGD1565533 |                                                                                 | 7.55E-01 | NS | 2.59E-01 | NS | 3.84E-02 | -1.9 |
| A_64_P100051 | NM_001107005 |        |            |                                                                                 | 4.76E-01 | NS | 9.59E-01 | NS | 1.05E-02 | -1.9 |
| A_44_P386757 | NM_001099467 | 289295 | Vom2r30    | vomer nasal 2 receptor, 30                                                      | 8.18E-02 | NS | 1.10E-01 | NS | 2.62E-02 | -1.9 |
| A_64_P022540 | XM_001079856 |        |            |                                                                                 | 3.71E-01 | NS | 8.63E-01 | NS | 4.74E-02 | -1.9 |
| A_64_P015911 | NM_001039035 | 362687 | Sfrs7      | splicing factor, arginine/serine-rich 7                                         | 1.26E-01 | NS | 4.47E-01 | NS | 2.21E-02 | -1.9 |
| A_42_P689873 | NM_198754    | 301045 | Cmtm8      | CKLF-like MARVEL transmembrane domain containing 8                              | 2.08E-01 | NS | 7.84E-02 | NS | 4.43E-02 | -1.9 |
| A_44_P714812 | NM_001014256 | 365972 | Bhmt2      | betaine-homocysteine methyltransferase 2                                        | 9.53E-01 | NS | 6.29E-01 | NS | 3.02E-02 | -1.9 |
| A_64_P088990 | NM_053335    | 81717  | Ctbp2      | C-terminal binding protein 2                                                    | 1.71E-01 | NS | 9.28E-01 | NS | 8.36E-04 | -1.9 |
| A_44_P386633 | NM_145785    | 252941 | Hdgfrp3    | hepatoma-derived growth factor, related protein 3                               | 1.62E-01 | NS | 5.84E-01 | NS | 1.66E-02 | -1.9 |
| A_43_P12767  | NM_053326    | 64353  | Pdlim5     | PDZ and LIM domain 5                                                            | 2.77E-01 | NS | 6.68E-01 | NS | 3.01E-03 | -1.9 |
| A_64_P095266 | XM_001073964 | 690286 | LOC690286  | similar to hepatic leukemia factor                                              | 8.74E-01 | NS | 5.44E-01 | NS | 3.61E-02 | -1.9 |
| A_44_P137497 | AY325224     |        |            |                                                                                 | 9.52E-02 | NS | 6.36E-01 | NS | 4.12E-04 | -1.9 |
| A_64_P131791 | NM_001100889 | 305230 | Shroom3    | shroom family member 3                                                          | 9.25E-01 | NS | 3.04E-01 | NS | 2.25E-02 | -1.9 |
| A_64_P087856 | NM_001134615 | 499587 | Slc7a14    | solute carrier family 7 (cationic amino acid transporter, y+ system), member 14 | 5.77E-02 | NS | 5.60E-01 | NS | 1.09E-02 | -1.9 |
| A_64_P122497 | NM_170787    | 259269 | Erc2       | ELKS/RAB6-interacting/CAST family member 2                                      | 1.68E-01 | NS | 4.24E-01 | NS | 3.52E-02 | -1.9 |
| A_44_P897023 | NM_001008364 | 361328 | Snx24      | sorting nexin 24                                                                | 9.24E-02 | NS | 5.20E-01 | NS | 1.95E-02 | -1.9 |
| A_64_P112281 | XR_008377    |        |            |                                                                                 | 9.52E-01 | NS | 2.29E-01 | NS | 5.92E-03 | -1.9 |
| A_44_P273355 | NM_019310    | 54258  | Il8ra      | interleukin 8 receptor, alpha family with sequence similarity 194, member A     | 9.68E-01 | NS | 8.34E-01 | NS | 1.18E-02 | -1.9 |
| A_64_P073609 | NM_001024300 | 499626 | Fam194a    | dead end homolog 1 (zebrafish)                                                  | 5.40E-01 | NS | 1.40E-01 | NS | 6.54E-03 | -1.9 |
| A_64_P001080 | NM_001109379 | 679841 | Dnd1       | Fraser syndrome 1 homolog (human)                                               | 1.70E-01 | NS | 6.82E-01 | NS | 7.25E-03 | -1.9 |
| A_64_P041270 | XM_214004    | 289486 | Fras1      |                                                                                 | 1.06E-01 | NS | 1.05E-01 | NS | 9.68E-04 | -1.9 |

|               |              |           |              |                                                                                                                                                  |          |    |          |    |          |      |
|---------------|--------------|-----------|--------------|--------------------------------------------------------------------------------------------------------------------------------------------------|----------|----|----------|----|----------|------|
| A_64_P162115  | NM_022633    | 64568     | Galp         | galanin-like peptide protein Z, vitamin K-dependent plasma glycoprotein                                                                          | 7.91E-01 | NS | 8.98E-02 | NS | 4.39E-02 | -1.9 |
| A_64_P008517  |              | 306608    | Proz         |                                                                                                                                                  | 9.28E-01 | NS | 1.08E-01 | NS | 3.93E-03 | -1.9 |
| A_64_P086502  | XM_001079904 |           |              |                                                                                                                                                  | 1.13E-01 | NS | 6.08E-01 | NS | 8.93E-03 | -1.9 |
| A_64_P138483  | NM_001000928 | 405248    | Olr583       | olfactory receptor 583                                                                                                                           | 7.60E-01 | NS | 8.33E-01 | NS | 1.40E-02 | -1.9 |
| A_64_P100773  | XM_237569    |           |              |                                                                                                                                                  | 2.83E-01 | NS | 3.45E-01 | NS | 2.16E-02 | -1.9 |
| A_44_P222124  | NM_001007650 | 297891    | Tssk3        | testis-specific serine kinase 3                                                                                                                  | 1.58E-01 | NS | 2.16E-01 | NS | 1.01E-02 | -1.9 |
| A_64_P073213  | NM_001134542 | 307396    | Pcyox1l      | prenylcysteine oxidase 1 like hepatoma-derived growth factor, related protein 3                                                                  | 1.76E-01 | NS | 3.44E-01 | NS | 4.04E-04 | -1.9 |
| A_64_P052132  | NM_145785    | 252941    | Hdgrfp3      | similar to diacylglycerol kinase, delta                                                                                                          | 9.60E-02 | NS | 4.70E-01 | NS | 7.86E-03 | -1.9 |
| A_43_P19006   | XM_001065445 | 368088    | RGD1563309   | 130kDa isoform 1                                                                                                                                 | 3.56E-01 | NS | 2.92E-01 | NS | 8.17E-04 | -1.9 |
| A_64_P007452  | NM_001044299 | 690784    | LOC690784    | hypothetical protein LOC690784 acyl-CoA synthetase medium-chain family member 3                                                                  | 4.59E-01 | NS | 1.32E-01 | NS | 9.97E-03 | -1.9 |
| A_43_P15937   | NM_033231    | 24763     | Acsm3        |                                                                                                                                                  | 1.13E-01 | NS | 7.45E-01 | NS | 1.24E-02 | -1.9 |
| A_44_P539349  | NM_001107015 | 303256    | Tm4sf5       | transmembrane 4 L six family member 5                                                                                                            | 3.44E-01 | NS | 6.94E-01 | NS | 4.68E-02 | -1.9 |
| A_64_P012671  | XM_002730098 | 100362274 | LOC100362274 | hypothetical protein LOC100362274                                                                                                                | 7.25E-01 | NS | 7.69E-01 | NS | 1.68E-02 | -1.9 |
| A_64_P111065  | XM_001079328 | 368175    | RGD1565071   | similar to hypothetical protein 4930509O22                                                                                                       | 6.05E-01 | NS | 1.47E-01 | NS | 1.53E-02 | -1.9 |
| A_64_P073500  | NM_001000687 | 404892    | Olr456       | olfactory receptor 456                                                                                                                           | 7.69E-02 | NS | 9.39E-01 | NS | 4.33E-02 | -1.9 |
| A_44_P332606  | NM_172222    | 24231     | C2           | complement component 2                                                                                                                           | 2.25E-01 | NS | 9.53E-02 | NS | 1.47E-02 | -1.9 |
| A_64_P025441  | NM_017312    | 29884     | Bok          | BCL2-related ovarian killer                                                                                                                      | 1.77E-01 | NS | 3.96E-01 | NS | 1.60E-02 | -1.9 |
| A_44_P540517  | NM_001110055 | 499839    | RGD1564664   | similar to LOC387763 protein                                                                                                                     | 5.84E-01 | NS | 7.73E-01 | NS | 1.47E-02 | -1.9 |
| A_44_P233963  | NM_012981    | 25482     | Mras         | muscle RAS oncogene homolog                                                                                                                      | 3.98E-01 | NS | 6.64E-01 | NS | 8.93E-04 | -1.9 |
| A_43_P15445   | NM_012852    | 25323     | Htr1d        | 5-hydroxytryptamine (serotonin) receptor 1D                                                                                                      | 1.62E-01 | NS | 9.24E-01 | NS | 3.24E-02 | -1.9 |
| A_64_P159837  | NM_198752    | 300053    | KIFC2        | kinesin family member C2                                                                                                                         | 1.02E-01 | NS | 6.97E-01 | NS | 1.14E-02 | -1.9 |
| A_64_P042694  | NM_001170541 | 363614    | Gtif3b       | gene trap locus F3b                                                                                                                              | 7.64E-02 | NS | 5.85E-01 | NS | 2.00E-03 | -1.9 |
| A_44_P461849  | NM_001107414 | 307724    | Rpgrip1l     | Rpgrip1-like                                                                                                                                     | 5.27E-01 | NS | 4.25E-01 | NS | 3.56E-03 | -1.9 |
| A_64_P115721  | NM_017162    | 29319     | Gif          | gastric intrinsic factor                                                                                                                         | 8.44E-01 | NS | 9.02E-02 | NS | 3.88E-02 | -1.9 |
| A_44_P137633  | Y12519       | 29290     | Adora1       | adenosine A1 receptor                                                                                                                            | 3.68E-01 | NS | 8.08E-01 | NS | 2.97E-02 | -1.8 |
| A_44_P403302  | NM_001106342 | 293840    | Pnma3        | paraneoplastic antigen MA3 translocation associated membrane protein 1                                                                           | 7.76E-01 | NS | 2.55E-01 | NS | 1.27E-03 | -1.8 |
| A_64_P107702  | AY387055     | 312903    | Tram1        |                                                                                                                                                  | 4.29E-01 | NS | 2.39E-01 | NS | 1.72E-02 | -1.8 |
| A_44_P1013405 | NM_001009603 | 293653    | Acy3         | aspartoacylase (aminocyclase) 3                                                                                                                  | 1.92E-01 | NS | 7.68E-01 | NS | 2.60E-02 | -1.8 |
| A_64_P103596  | XM_002725764 | 688884    | Gpr152       | G protein-coupled receptor 152                                                                                                                   | 2.53E-01 | NS | 5.85E-02 | NS | 4.68E-02 | -1.8 |
| A_44_P491724  | NM_213565    | 361783    | Zfp57        | zinc finger protein 57                                                                                                                           | 8.61E-01 | NS | 6.25E-01 | NS | 4.28E-02 | -1.8 |
| A_64_P026707  | NM_001100996 | 502570    | RGD1559714   | similar to TDPOZ3                                                                                                                                | 6.41E-02 | NS | 4.70E-01 | NS | 1.25E-02 | -1.8 |
| A_64_P060485  | XM_001075255 | 686683    | LOC686683    | similar to olfactory receptor 73                                                                                                                 | 1.41E-01 | NS | 3.78E-01 | NS | 1.65E-03 | -1.8 |
| A_42_P454378  | NM_019214    | 29440     | Slc26a4      | solute carrier family 26, member 4                                                                                                               | 8.04E-01 | NS | 9.24E-01 | NS | 2.30E-02 | -1.8 |
| A_64_P026632  | XM_001056752 | 299305    | RGD1563945   | similar to mKIAA0215 protein                                                                                                                     | 8.77E-01 | NS | 9.23E-01 | NS | 7.09E-03 | -1.8 |
| A_64_P120387  | NM_001109640 | 691448    | LOC691448    | similar to solute carrier family 25 member 24 isoform 1 asparagine-linked glycosylation 2, alpha-1,3-mannosyltransferase homolog (S. cerevisiae) | 3.76E-01 | NS | 1.34E-01 | NS | 3.95E-02 | -1.8 |
| A_64_P012714  | NM_001100710 | 313231    | Alg2         |                                                                                                                                                  | 9.79E-01 | NS | 7.65E-01 | NS | 2.26E-02 | -1.8 |
| A_42_P461144  | DV724416     |           |              |                                                                                                                                                  | 1.91E-01 | NS | 4.33E-01 | NS | 1.13E-02 | -1.8 |
| A_64_P122005  | NM_031855    | 25659     | Khk          | ketohexokinase                                                                                                                                   | 7.19E-02 | NS | 9.23E-01 | NS | 2.32E-02 | -1.8 |
| A_44_P221965  | NM_053649    | 114107    | Kremen1      | kringle containing transmembrane protein 1                                                                                                       | 2.97E-01 | NS | 5.30E-02 | NS | 2.82E-02 | -1.8 |
| A_64_P075189  | NM_001000467 | 300613    | Olr1311      | olfactory receptor 1311                                                                                                                          | 6.70E-01 | NS | 7.66E-02 | NS | 5.73E-03 | -1.8 |
| A_64_P110215  | NM_145087    | 246305    | Spag11b      | sperm associated antigen 11B                                                                                                                     | 3.11E-01 | NS | 2.15E-01 | NS | 6.00E-03 | -1.8 |
| A_64_P046573  | NM_022180    | 25735     | Hnf4a        | hepatocyte nuclear factor 4, alpha                                                                                                               | 3.77E-01 | NS | 4.85E-01 | NS | 7.23E-03 | -1.8 |
| A_64_P022552  | NM_001107871 | 312504    | RGD1566130   | similar to mKIAA1940 protein                                                                                                                     | 6.82E-02 | NS | 4.40E-01 | NS | 9.50E-03 | -1.8 |
| A_64_P121682  | NM_001107635 | 309816    | Lama4        | laminin, alpha 4                                                                                                                                 | 7.11E-01 | NS | 9.28E-02 | NS | 3.23E-02 | -1.8 |
| A_64_P147119  | NM_001000776 | 405051    | Olr1442      | olfactory receptor 1442                                                                                                                          | 3.48E-01 | NS | 3.12E-01 | NS | 3.00E-03 | -1.8 |
| A_64_P024416  | XM_001071334 | 303903    | Parp14       | poly (ADP-ribose) polymerase family, member 14                                                                                                   | 6.66E-01 | NS | 8.93E-01 | NS | 1.95E-03 | -1.8 |
| A_64_P143507  | NM_001126273 | 304578    | Alkbh2       | alkB, alkylation repair homolog 2 (E. coli)                                                                                                      | 1.73E-01 | NS | 4.23E-01 | NS | 2.98E-02 | -1.8 |
| A_64_P144153  | XM_002725697 | 308850    | Khl35        | kelch-like 35 (Drosophila)                                                                                                                       | 1.17E-01 | NS | 5.61E-01 | NS | 4.65E-02 | -1.8 |
| A_64_P143350  | NM_001025758 | 497959    | Proca1       | protein interacting with cyclin A1                                                                                                               | 2.19E-01 | NS | 5.75E-01 | NS | 3.55E-02 | -1.8 |

|               |              |           |              |                                                                                                             |          |    |          |    |          |      |
|---------------|--------------|-----------|--------------|-------------------------------------------------------------------------------------------------------------|----------|----|----------|----|----------|------|
| A_64_P097840  | XM_001073004 | 688219    | LOC688219    | similar to X-linked lymphocyte-regulated protein 3A                                                         | 4.19E-01 | NS | 6.76E-01 | NS | 4.45E-02 | -1.8 |
| A_64_P370438  | NM_022501    | 338401    | Crip2        | cysteine-rich protein 2                                                                                     | 1.61E-01 | NS | 8.23E-02 | NS | 1.01E-02 | -1.8 |
| A_43_P16250   | NM_001135759 | 363265    | Col4a3       | collagen, type IV, alpha 3                                                                                  | 7.82E-01 | NS | 4.83E-01 | NS | 8.56E-03 | -1.8 |
| A_64_P118227  | XM_002728056 | 289344    | Hhat         | hedgehog acyltransferase<br>proline/arginine-rich end leucine-rich repeat                                   | 1.83E-01 | NS | 8.40E-01 | NS | 1.66E-02 | -1.8 |
| A_64_P013147  | NM_053385    | 84400     | Prelp        | protein                                                                                                     | 7.32E-02 | NS | 7.10E-01 | NS | 3.23E-02 | -1.8 |
| A_64_P001622  | NM_001103364 | 100125385 | LOC100125385 | hypothetical protein LOC100125385                                                                           | 5.70E-01 | NS | 8.11E-01 | NS | 4.37E-02 | -1.8 |
| A_64_P110966  | NM_001014106 | 499328    | Rfk          | riboflavin kinase<br>echinoderm microtubule associated protein                                              | 1.53E-01 | NS | 2.17E-01 | NS | 1.21E-02 | -1.8 |
| A_44_P290357  | NM_138921    | 192360    | Eml2         | like 2                                                                                                      | 5.92E-01 | NS | 2.39E-01 | NS | 2.21E-02 | -1.8 |
| A_64_P028803  | NM_001107111 | 304091    | Il10rb       | interleukin 10 receptor, beta<br>poly (ADP-ribose) polymerase family,<br>member 12                          | 7.81E-01 | NS | 3.89E-01 | NS | 7.12E-03 | -1.8 |
| A_64_P028061  | NM_001108623 | 362343    | Parp12       |                                                                                                             | 4.84E-01 | NS | 4.93E-01 | NS | 1.27E-02 | -1.8 |
| A_64_P081862  | AB007601     |           |              |                                                                                                             | 3.38E-01 | NS | 2.53E-01 | NS | 1.61E-02 | -1.8 |
| A_64_P131224  | AY325187     | 308100    | Acat2        | acetyl-Coenzyme A acetyltransferase 2                                                                       | 1.96E-01 | NS | 8.11E-02 | NS | 4.82E-02 | -1.8 |
| A_64_P034090  | NM_201426    | 399475    | Adm2         | adrenomedullin 2                                                                                            | 7.92E-01 | NS | 9.35E-01 | NS | 2.43E-03 | -1.8 |
| A_64_P165548  | XM_001055860 | 317204    | Pcdh11x      | protocadherin 11 X-linked<br>FERM, RhoGEF (Arhgef) and pleckstrin<br>domain protein 1 (chondrocyte-derived) | 3.59E-01 | NS | 2.29E-01 | NS | 4.78E-02 | -1.8 |
| A_42_P787239  | NM_001107287 | 306183    | Farp1        | transient receptor potential cation channel,<br>subfamily C, member 6                                       | 2.56E-01 | NS | 8.17E-01 | NS | 1.80E-02 | -1.8 |
| A_64_P064621  | NM_053559    | 89823     | Trpc6        |                                                                                                             | 1.71E-01 | NS | 7.60E-02 | NS | 2.73E-02 | -1.8 |
| A_64_P127678  | NM_001008553 | 65156     | Dhodh        | dihydroorotate dehydrogenase                                                                                | 6.19E-02 | NS | 3.18E-01 | NS | 2.76E-02 | -1.8 |
| A_64_P105348  | XM_002726259 | 312254    | Chmp4b       | chromatin modifying protein 4B                                                                              | 2.81E-01 | NS | 1.43E-01 | NS | 1.10E-03 | -1.8 |
| A_64_P142305  | XM_001067437 | 292548    | Zfp418       | zinc finger protein 418                                                                                     | 6.33E-01 | NS | 1.37E-01 | NS | 2.28E-03 | -1.8 |
| A_43_P19590   | NM_001130581 | 300074    | RGD1305939   | hypothetical LOC300074                                                                                      | 3.27E-01 | NS | 7.93E-01 | NS | 2.10E-02 | -1.8 |
| A_64_P143947  | FM097667     |           |              |                                                                                                             | 8.33E-01 | NS | 1.28E-01 | NS | 6.13E-03 | -1.8 |
| A_64_P072739  | NM_001109160 | 499308    | Flrt1        | fibronectin leucine rich transmembrane<br>protein 1                                                         | 4.67E-01 | NS | 8.39E-02 | NS | 3.56E-02 | -1.8 |
| A_64_P004344  | XM_001062079 |           |              |                                                                                                             | 1.11E-01 | NS | 7.57E-01 | NS | 7.85E-03 | -1.8 |
| A_64_P057412  | XM_002727562 |           |              |                                                                                                             | 3.67E-01 | NS | 4.32E-01 | NS | 1.27E-02 | -1.8 |
| A_44_P297596  | NM_001107740 | 311163    | Ctnnd1       | catenin (cadherin associated protein), delta<br>1                                                           | 1.08E-01 | NS | 7.32E-01 | NS | 3.82E-03 | -1.8 |
| A_64_P122691  | XR_085880    | 366915    | RGD1309483   | similar to hypothetical protein MGC39715                                                                    | 5.79E-01 | NS | 2.60E-01 | NS | 1.74E-02 | -1.8 |
| A_64_P166178  | XM_225744    | 291423    | Setbp1       | SET binding protein 1                                                                                       | 4.42E-01 | NS | 1.49E-01 | NS | 2.06E-02 | -1.8 |
| A_64_P022799  | NM_053371    | 84384     | Fxc1         | fractured callus expressed transcript 1                                                                     | 3.10E-01 | NS | 6.27E-01 | NS | 3.38E-04 | -1.8 |
| A_64_P032762  | NM_001106312 | 293591    | Cd163i1      | CD163 molecule-like 1                                                                                       | 5.61E-01 | NS | 8.79E-01 | NS | 4.87E-02 | -1.8 |
| A_64_P012031  | XM_001069984 | 295707    | Tnks1bp1     | tankyrase 1 binding protein 1                                                                               | 1.94E-01 | NS | 2.81E-01 | NS | 3.05E-03 | -1.8 |
| A_44_P118793  | AY325158     |           |              |                                                                                                             | 2.91E-01 | NS | 4.19E-01 | NS | 3.67E-02 | -1.8 |
| A_64_P015153  | XM_001067075 | 688469    | Adam25       | a disintegrin and metallopeptidase domain<br>25 (testase 2)                                                 | 1.78E-01 | NS | 1.53E-01 | NS | 2.31E-02 | -1.8 |
| A_64_P373559  | XM_228129    |           |              |                                                                                                             | 1.17E-01 | NS | 4.02E-01 | NS | 1.45E-02 | -1.8 |
| A_44_P192288  | NM_001106195 | 292078    | RGD1561507   | similar to hypothetical protein FLJ31606                                                                    | 2.86E-01 | NS | 1.05E-01 | NS | 2.17E-02 | -1.8 |
| A_64_P041476  | NM_001017500 | 498368    | LOC498368    | similar to RIKEN cDNA 0610040J01                                                                            | 1.16E-01 | NS | 2.31E-01 | NS | 1.77E-02 | -1.8 |
| A_64_P144670  | XM_001068586 | 289584    | Usp46        | ubiquitin specific peptidase 46                                                                             | 1.50E-01 | NS | 9.26E-01 | NS | 3.41E-03 | -1.8 |
| A_64_P294274  | NM_001106710 | 298845    | Emilin1      | elastin microfibril interfacier 1                                                                           | 8.56E-01 | NS | 9.76E-01 | NS | 3.88E-03 | -1.8 |
| A_44_P721823  | NM_001105880 | 288105    | Zbtb20       | zinc finger and BTB domain containing 20                                                                    | 7.40E-01 | NS | 2.44E-01 | NS | 2.64E-03 | -1.8 |
| A_42_P820847  | NM_001014077 | 314148    | Clec14a      | C-type lectin domain family 14, member a                                                                    | 8.83E-02 | NS | 2.93E-01 | NS | 9.46E-04 | -1.8 |
| A_44_P1035071 | NM_207590    | 291318    | Nmt2         | N-myristoyltransferase 2                                                                                    | 6.74E-01 | NS | 1.46E-01 | NS | 2.59E-02 | -1.8 |
| A_64_P009490  | XM_002726348 |           |              |                                                                                                             | 7.97E-02 | NS | 5.10E-01 | NS | 8.42E-03 | -1.8 |
| A_64_P101504  | NM_001037506 | 641629    | Defb26       | defensin beta 26                                                                                            | 9.20E-01 | NS | 1.06E-01 | NS | 3.67E-02 | -1.8 |
| A_64_P153027  | NM_001008874 | 408235    | Spink6       | serine peptidase inhibitor, Kazal type 6                                                                    | 7.32E-01 | NS | 2.46E-01 | NS | 6.46E-03 | -1.8 |
| A_64_P127016  | NM_001130537 | 299510    | Zbtb39       | zinc finger and BTB domain containing 39                                                                    | 5.13E-01 | NS | 5.56E-02 | NS | 6.97E-03 | -1.8 |
| A_64_P001219  | NM_001009349 | 300886    | Mthfs        | 5,10-methylenetetrahydrofolate synthetase<br>(5-formyltetrahydrofolate cyclo-ligase)                        | 1.44E-01 | NS | 7.94E-02 | NS | 2.32E-02 | -1.8 |
| A_64_P132182  | XM_001073316 |           |              |                                                                                                             | 5.99E-01 | NS | 6.04E-02 | NS | 2.34E-02 | -1.8 |
| A_43_P14764   | NM_021767    | 60391     | Nrxn1        | neurexin 1                                                                                                  | 1.37E-01 | NS | 3.21E-01 | NS | 1.25E-02 | -1.8 |
| A_64_P152727  | XM_001054737 | 29650     | Adam10       | ADAM metallopeptidase domain 10                                                                             | 6.12E-01 | NS | 4.90E-01 | NS | 3.55E-03 | -1.8 |
| A_64_P116924  | NM_001047934 | 498705    | LOC498705    | hypothetical protein LOC498705                                                                              | 6.30E-02 | NS | 9.99E-02 | NS | 4.23E-03 | -1.8 |
| A_64_P005832  | NM_001025634 | 290500    | A2ld1        | AlG2-like domain 1                                                                                          | 1.80E-01 | NS | 6.29E-01 | NS | 2.94E-02 | -1.8 |

|               |               |           |              |                                                                                                                                                             |          |    |          |    |          |      |
|---------------|---------------|-----------|--------------|-------------------------------------------------------------------------------------------------------------------------------------------------------------|----------|----|----------|----|----------|------|
| A_64_P031304  | NM_057142     | 117284    | Lrrc7        | leucine rich repeat containing 7 protein tyrosine phosphatase, receptor type, E                                                                             | 3.04E-01 | NS | 5.35E-01 | NS | 1.52E-02 | -1.8 |
| A_64_P137130  | NM_053767     | 114767    | Ptpre        |                                                                                                                                                             | 8.97E-02 | NS | 5.05E-02 | NS | 4.76E-02 | -1.8 |
| A_64_P090747  | NM_012649     | 24771     | Sdc4         | syndecan 4                                                                                                                                                  | 6.64E-02 | NS | 7.02E-01 | NS | 1.72E-02 | -1.8 |
| A_64_P048939  | XM_002726783  | 100364624 | LOC100364624 | hypothetical protein LOC100364624 carbohydrate (N-acetylglucosamine 6-O) sulfotransferase 7                                                                 | 6.86E-02 | NS | 3.51E-01 | NS | 2.89E-02 | -1.8 |
| A_64_P062608  | NM_207600     | 302302    | Chst7        |                                                                                                                                                             | 7.56E-02 | NS | 5.88E-01 | NS | 6.20E-03 | -1.8 |
| A_64_P004796  | NM_138517     | 171528    | Gzmb         | granzyme B                                                                                                                                                  | 2.74E-01 | NS | 3.29E-01 | NS | 4.38E-02 | -1.8 |
| A_64_P028426  | NM_001107809  | 311721    | Znf512b      | zinc finger protein 512B calcium/calmodulin-dependent protein kinase II inhibitor 1                                                                         | 8.60E-02 | NS | 8.17E-01 | NS | 3.53E-02 | -1.8 |
| A_44_P493606  | NM_173337     | 287005    | Camk2n1      |                                                                                                                                                             | 3.73E-01 | NS | 3.70E-01 | NS | 3.92E-03 | -1.8 |
| A_42_P705090  | NM_001107154  | 304580    | Ssh1         | slingshot homolog 1 (Drosophila) similar to phosphatase and actin regulator 4                                                                               | 1.17E-01 | NS | 3.46E-01 | NS | 3.26E-03 | -1.8 |
| A_44_P902822  | XM_001063709  | 682920    | LOC682920    |                                                                                                                                                             | 6.99E-01 | NS | 5.77E-01 | NS | 6.41E-03 | -1.8 |
| A_42_P475151  | NM_001024864  | 287061    | Rogdi        | rogdi homolog (Drosophila)                                                                                                                                  | 5.33E-02 | NS | 5.38E-02 | NS | 2.26E-02 | -1.8 |
| A_64_P033979  | NM_019161     | 29182     | Cdh22        | cadherin 22                                                                                                                                                 | 5.35E-01 | NS | 8.36E-01 | NS | 1.08E-02 | -1.8 |
| A_64_P122612  | XM_343054     |           |              |                                                                                                                                                             | 7.31E-02 | NS | 4.31E-01 | NS | 7.31E-03 | -1.8 |
| A_42_P600870  | NM_0011171802 | 500413    | LOC500413    | hypothetical protein LOC500413                                                                                                                              | 2.03E-01 | NS | 4.12E-01 | NS | 1.48E-02 | -1.8 |
| A_44_P161411  | XM_002729003  |           |              |                                                                                                                                                             | 5.06E-01 | NS | 8.26E-01 | NS | 3.28E-04 | -1.8 |
| A_64_P060559  | XM_579791     | 498181    | RGD1564803   | RGD1564803                                                                                                                                                  | 2.99E-01 | NS | 9.48E-02 | NS | 2.62E-02 | -1.8 |
| A_64_P073420  | NM_198729     | 289526    | Vcsa2        | variable coding sequence A2                                                                                                                                 | 9.00E-01 | NS | 1.11E-01 | NS | 4.70E-02 | -1.8 |
| A_64_P025963  | NM_001100474  | 117524    | Ccnf         | cyclin F                                                                                                                                                    | 6.39E-02 | NS | 5.37E-01 | NS | 4.99E-02 | -1.8 |
| A_64_P141888  | XM_001073866  | 502857    | Noto         | notochord homeobox                                                                                                                                          | 3.76E-01 | NS | 4.61E-01 | NS | 1.87E-02 | -1.8 |
| A_64_P138216  | NM_024356     | 29244     | Gch1         | GTP cyclohydrolase 1                                                                                                                                        | 9.70E-02 | NS | 2.81E-01 | NS | 4.11E-02 | -1.8 |
| A_64_P086550  | AB005540      |           |              |                                                                                                                                                             | 1.34E-01 | NS | 2.96E-01 | NS | 7.49E-03 | -1.8 |
| A_64_P109387  | NM_001108653  | 362466    | Bicd1        | bicaudal D homolog 1 (Drosophila)                                                                                                                           | 3.67E-01 | NS | 8.63E-01 | NS | 1.80E-02 | -1.8 |
| A_64_P092718  | NM_012512     | 24223     | B2m          | beta-2 microglobulin                                                                                                                                        | 2.05E-01 | NS | 8.75E-01 | NS | 8.90E-03 | -1.8 |
| A_64_P095760  | NM_001109079  | 305012    | Kif26b       | kinesin family member 26B similar to Glutathione S-transferase A1 (GTH1) (HA subunit 1) (GST-epsilon) (GSTA1-1) (GST class-alpha)                           | 1.25E-01 | NS | 8.28E-01 | NS | 3.41E-02 | -1.8 |
| A_42_P623733  | NM_001024361  | 501110    | LOC501110    |                                                                                                                                                             | 2.45E-01 | NS | 4.48E-01 | NS | 1.13E-03 | -1.8 |
| A_44_P293315  | NM_001106826  | 300754    | Bbs4         | Bardet-Biedl syndrome 4                                                                                                                                     | 8.74E-02 | NS | 9.49E-01 | NS | 2.82E-03 | -1.8 |
| A_44_P267218  | XM_001064125  | 308839    | Rsf1         | remodeling and spacing factor 1                                                                                                                             | 5.15E-01 | NS | 3.42E-01 | NS | 1.26E-02 | -1.8 |
| A_44_P424614  | NM_001025025  | 363267    | LOC363267    | hypothetical protein LOC363267                                                                                                                              | 9.62E-01 | NS | 6.23E-02 | NS | 4.06E-02 | -1.8 |
| A_44_P1046118 | NM_001109054  | 498095    | Tctex1d2     | Tctex1 domain containing 2                                                                                                                                  | 8.89E-02 | NS | 2.61E-01 | NS | 4.51E-02 | -1.8 |
| A_64_P056743  | NM_0011177830 | 100366054 | LOC100366054 | Da1-10-like                                                                                                                                                 | 1.58E-01 | NS | 6.80E-01 | NS | 3.39E-02 | -1.8 |
| A_44_P570046  | CB586512      |           |              |                                                                                                                                                             | 1.46E-01 | NS | 4.15E-01 | NS | 1.28E-02 | -1.8 |
| A_44_P575424  | NM_001017466  | 361916    | Chmp4c       | chromatin modifying protein 4C                                                                                                                              | 1.56E-01 | NS | 1.79E-01 | NS | 2.83E-02 | -1.8 |
| A_64_P158693  | XM_346138     | 367436    | LOC367436    | similar to Y-linked testis-specific protein Fc fragment of IgE, high affinity I, receptor for, alpha polypeptide                                            | 8.64E-01 | NS | 6.63E-01 | NS | 8.38E-03 | -1.8 |
| A_64_P052825  | NM_012724     | 25047     | Fcer1a       |                                                                                                                                                             | 5.83E-01 | NS | 2.15E-01 | NS | 4.39E-02 | -1.8 |
| A_64_P024130  | L08609        |           |              |                                                                                                                                                             | 1.58E-01 | NS | 5.66E-02 | NS | 3.64E-02 | -1.8 |
| A_64_P032542  | XM_233288     |           |              |                                                                                                                                                             | 6.72E-01 | NS | 7.20E-01 | NS | 4.10E-02 | -1.8 |
| A_44_P332586  | NM_001047884  | 310062    | Zswim6       | zinc finger, SWIM-type containing 6                                                                                                                         | 1.22E-01 | NS | 6.65E-01 | NS | 1.27E-03 | -1.8 |
| A_64_P043502  | XM_001069513  | 289926    | RGD1565725   | similar to hypothetical protein FLJ23834                                                                                                                    | 8.14E-01 | NS | 7.61E-01 | NS | 1.71E-02 | -1.8 |
| A_44_P1037285 | NM_212541     | 294255    | Slc44a4      | solute carrier family 44, member 4                                                                                                                          | 1.00E-01 | NS | 9.81E-02 | NS | 1.79E-02 | -1.8 |
| A_42_P756350  | NM_021772     | 60396     | Cdkl3        | cyclin-dependent kinase-like 3                                                                                                                              | 2.88E-01 | NS | 7.96E-01 | NS | 2.92E-03 | -1.8 |
| A_44_P215582  | NM_001009316  | 296470    | Pdpdf        | pancreatic progenitor cell differentiation and proliferation factor homolog (zebrafish) potassium voltage-gated channel, shaker-related subfamily, member 2 | 1.17E-01 | NS | 4.15E-01 | NS | 3.36E-03 | -1.8 |
| A_44_P217295  | NM_012970     | 25468     | Kcna2        |                                                                                                                                                             | 1.25E-01 | NS | 8.84E-01 | NS | 1.63E-02 | -1.8 |
| A_44_P461989  | NM_001024786  | 313417    | Wdr78        | WD repeat domain 78                                                                                                                                         | 4.70E-01 | NS | 3.39E-01 | NS | 4.45E-02 | -1.8 |
| A_64_P105992  | NM_001047941  | 499530    | LOC499530    | hypothetical protein LOC499530                                                                                                                              | 5.95E-01 | NS | 5.47E-01 | NS | 2.26E-02 | -1.8 |
| A_44_P515679  | NM_001107447  | 308003    | Rab11fp2     | RAB11 family interacting protein 2 (class I)                                                                                                                | 2.46E-01 | NS | 9.02E-01 | NS | 8.43E-03 | -1.8 |
| A_64_P145536  | NM_001107536  | 308846    | Uvrug        | UV radiation resistance associated gene                                                                                                                     | 6.48E-02 | NS | 3.17E-01 | NS | 1.18E-02 | -1.7 |
| A_64_P011139  | NM_001106682  | 298483    | Lao1         | L-amino acid oxidase 1                                                                                                                                      | 6.39E-01 | NS | 4.88E-01 | NS | 4.60E-02 | -1.7 |
| A_64_P051982  | XM_001054790  |           |              |                                                                                                                                                             | 7.05E-01 | NS | 6.22E-02 | NS | 3.60E-02 | -1.7 |
| A_44_P472855  | NM_001000961  | 405313    | Olr1279      | olfactory receptor 1279                                                                                                                                     | 3.40E-01 | NS | 6.74E-01 | NS | 2.71E-02 | -1.7 |
| A_64_P004378  | XM_001062490  | 682652    | LOC682652    | similar to 60S ribosomal protein L29 (P23)                                                                                                                  | 5.02E-01 | NS | 1.60E-01 | NS | 3.25E-02 | -1.7 |

|               |              |           |              |                                                                                                                                                 |          |    |          |    |          |      |
|---------------|--------------|-----------|--------------|-------------------------------------------------------------------------------------------------------------------------------------------------|----------|----|----------|----|----------|------|
| A_64_P122671  | NM_134373    | 171386    | Avpi1        | arginine vasopressin-induced 1                                                                                                                  | 8.90E-02 | NS | 9.28E-01 | NS | 4.09E-02 | -1.7 |
| A_44_P792281  | NM_001109597 | 690489    | Cys1         | cystin 1                                                                                                                                        | 3.29E-01 | NS | 1.96E-01 | NS | 9.33E-03 | -1.7 |
| A_64_P118225  | XM_001064613 | 685636    | LOC685636    | hypothetical protein LOC685636                                                                                                                  | 2.86E-01 | NS | 1.73E-01 | NS | 3.50E-02 | -1.7 |
| A_42_P749222  | NM_001025152 | 500707    | Tc2n         | tandem C2 domains, nuclear                                                                                                                      | 7.15E-02 | NS | 9.22E-02 | NS | 3.05E-02 | -1.7 |
| A_43_P23039   | XM_213443    | 287659    | Socs7        | suppressor of cytokine signaling 7                                                                                                              | 6.67E-01 | NS | 9.13E-01 | NS | 7.32E-03 | -1.7 |
| A_44_P1030081 | NM_001014091 | 315712    | Ccdc33       | coiled-coil domain containing 33                                                                                                                | 2.28E-01 | NS | 3.85E-01 | NS | 2.02E-02 | -1.7 |
| A_43_P17029   | NM_001106873 | 301113    | Slc25a23     | solute carrier family 25 (mitochondrial carrier; phosphate carrier), member 23                                                                  | 9.08E-02 | NS | 1.56E-01 | NS | 1.18E-02 | -1.7 |
| A_44_P337706  | XM_002729078 |           |              |                                                                                                                                                 | 8.97E-01 | NS | 5.17E-01 | NS | 1.58E-02 | -1.7 |
| A_64_P146682  | NM_001108082 | 314743    | Pctk2        | PCTAIRE protein kinase 2                                                                                                                        | 8.27E-02 | NS | 2.19E-01 | NS | 2.43E-02 | -1.7 |
| A_44_P395374  | NM_053779    | 116459    | Serpini1     | serine (or cysteine) peptidase inhibitor, clade I, member 1                                                                                     | 6.99E-01 | NS | 3.38E-01 | NS | 1.04E-02 | -1.7 |
| A_64_P135162  |              | 687620    | LOC687620    | similar to mirror-image polydactyly 1                                                                                                           | 2.07E-01 | NS | 3.06E-01 | NS | 6.57E-03 | -1.7 |
| A_64_P149884  | NM_001079884 | 293181    | Galnt4       | UDP-N-acetyl-alpha-D-galactosamine:polypeptide N-acetylgalactosaminyltransferase-like 4                                                         | 1.19E-01 | NS | 7.36E-02 | NS | 7.93E-03 | -1.7 |
| A_64_P144118  | NM_001106269 | 293012    | Olig3        | oligodendrocyte transcription factor 3                                                                                                          | 6.79E-01 | NS | 8.17E-02 | NS | 2.55E-02 | -1.7 |
| A_44_P340261  | NM_001025276 | 298077    | RGD1305807   | hypothetical LOC298077                                                                                                                          | 8.38E-01 | NS | 9.72E-01 | NS | 3.97E-02 | -1.7 |
| A_64_P040994  | NM_031605    | 266674    | Cyp4a8       | cytochrome P450, family 4, subfamily a, polypeptide 8                                                                                           | 6.12E-01 | NS | 4.88E-01 | NS | 2.49E-03 | -1.7 |
| A_43_P22653   | NM_001100990 | 498997    | Rspo3        | R-spondin 3 homolog ( <i>Xenopus laevis</i> )                                                                                                   | 6.94E-01 | NS | 6.80E-01 | NS | 1.74E-02 | -1.7 |
| A_42_P828102  | NM_212532    | 294239    | Ddah2        | dimethylarginine dimethylaminohydrolase 2                                                                                                       | 4.15E-01 | NS | 2.33E-01 | NS | 3.17E-04 | -1.7 |
| A_64_P113950  | XM_001069306 | 362341    | Zc3hav1l     | zinc finger CCCH-type, antiviral 1-like family with sequence similarity 193, member A                                                           | 1.50E-01 | NS | 4.27E-01 | NS | 1.74E-02 | -1.7 |
| A_64_P309789  | XM_223536    | 305452    | Fam193a      | member A                                                                                                                                        | 1.01E-01 | NS | 6.44E-01 | NS | 2.58E-02 | -1.7 |
| A_64_P091681  | XM_002729125 | 685374    | Ankrd13c     | ankyrin repeat domain 13C                                                                                                                       | 9.62E-01 | NS | 2.55E-01 | NS | 1.15E-02 | -1.7 |
| A_44_P748217  | XR_085863    | 503029    | RGD1559545   | similar to ATPase inhibitory factor 1                                                                                                           | 8.63E-02 | NS | 2.02E-01 | NS | 1.52E-02 | -1.7 |
| A_64_P085321  | NM_001177818 | 100362070 | LOC100362070 | LRRGT00020-like                                                                                                                                 | 6.92E-01 | NS | 2.97E-01 | NS | 3.05E-03 | -1.7 |
| A_42_P648707  | NM_001013120 | 303926    | Igsf11       | immunoglobulin superfamily, member 11                                                                                                           | 3.73E-01 | NS | 1.25E-01 | NS | 2.43E-02 | -1.7 |
| A_44_P1024567 | NM_001108364 | 360961    | Mxd4         | Max dimerization protein 4                                                                                                                      | 5.34E-02 | NS | 5.00E-01 | NS | 1.53E-02 | -1.7 |
| A_64_P013802  | NM_001170469 | 291604    | Dcp2         | DCP2 decapping enzyme homolog (S. cerevisiae)                                                                                                   | 2.66E-01 | NS | 5.62E-02 | NS | 3.31E-02 | -1.7 |
| A_44_P445575  | NM_001039505 | 306657    | Irx2         | iroquois homeobox 2                                                                                                                             | 8.00E-02 | NS | 9.10E-01 | NS | 1.50E-02 | -1.7 |
| A_42_P834614  | NM_133536    | 171058    | Rab3c        | RAB3C, member RAS oncogene family                                                                                                               | 9.90E-02 | NS | 5.93E-01 | NS | 1.73E-02 | -1.7 |
| A_64_P062638  | NM_013100    | 25637     | Ptger1       | prostaglandin E receptor 1 (subtype EP1)                                                                                                        | 2.37E-01 | NS | 4.31E-01 | NS | 1.65E-02 | -1.7 |
| A_42_P570635  | BF548127     |           |              |                                                                                                                                                 | 4.69E-01 | NS | 3.06E-01 | NS | 7.89E-03 | -1.7 |
| A_43_P15244   | NM_012596    | 24536     | Lepr         | leptin receptor                                                                                                                                 | 6.14E-01 | NS | 2.34E-01 | NS | 2.87E-02 | -1.7 |
| A_42_P764985  | NM_133402    | 170914    | Nap1l3       | nucleosome assembly protein 1-like 3                                                                                                            | 1.36E-01 | NS | 3.06E-01 | NS | 4.35E-02 | -1.7 |
| A_64_P115728  |              | 683029    | LOC683029    | hypothetical protein LOC683029                                                                                                                  | 1.95E-01 | NS | 7.56E-01 | NS | 2.12E-02 | -1.7 |
| A_64_P114713  | NM_001007654 | 298646    | Agtrap       | angiotensin II receptor-associated protein 4-nitrophenylphosphatase domain and non-neuronal SNAP25-like protein homolog 1 ( <i>C. elegans</i> ) | 9.07E-02 | NS | 4.92E-01 | NS | 3.67E-02 | -1.7 |
| A_64_P117091  | NM_001100730 | 360971    | Nipsnap1     | ( <i>C. elegans</i> )                                                                                                                           | 1.36E-01 | NS | 2.22E-01 | NS | 4.58E-02 | -1.7 |
| A_44_P210262  | NM_001000683 | 404888    | Olr483       | olfactory receptor 483                                                                                                                          | 2.87E-01 | NS | 9.50E-01 | NS | 3.90E-02 | -1.7 |
| A_64_P170718  | NM_001099494 | 691438    | Vom2r54      | vomer nasal 2 receptor, 54                                                                                                                      | 9.08E-01 | NS | 7.64E-01 | NS | 2.80E-02 | -1.7 |
| A_64_P007508  | NM_017104    | 25610     | Csf3         | colony stimulating factor 3 (granulocyte)                                                                                                       | 8.42E-02 | NS | 6.86E-01 | NS | 2.63E-02 | -1.7 |
| A_44_P547801  | NM_012796    | 29487     | Gstt2        | glutathione S-transferase, theta 2                                                                                                              | 1.54E-01 | NS | 7.14E-01 | NS | 8.54E-03 | -1.7 |
| A_64_P019643  | NM_032059    | 84006     | Prkci        | protein kinase C, iota                                                                                                                          | 2.09E-01 | NS | 7.38E-01 | NS | 1.22E-02 | -1.7 |
| A_44_P476598  | XM_002729465 | 500446    | RGD1559864   | similar to mKIAA1045 protein                                                                                                                    | 8.52E-01 | NS | 1.02E-01 | NS | 3.88E-02 | -1.7 |
| A_64_P117720  | NM_001014133 | 360910    | Abcg3l2      | ATP-binding cassette, sub-family G (WHITE), member 3-like 2                                                                                     | 2.24E-01 | NS | 7.40E-01 | NS | 2.20E-02 | -1.7 |
| A_42_P573312  | NM_001134761 | 499518    | Ccdc125      | coiled-coil domain containing 125                                                                                                               | 2.05E-01 | NS | 3.17E-01 | NS | 3.14E-02 | -1.7 |
| A_64_P160575  | XR_007378    |           |              |                                                                                                                                                 | 4.46E-01 | NS | 8.34E-01 | NS | 2.63E-02 | -1.7 |
| A_64_P017525  | XM_001057731 | 314555    | Tspyl5       | TSPY-like 5                                                                                                                                     | 9.11E-01 | NS | 6.17E-01 | NS | 2.97E-02 | -1.7 |
| A_44_P1056401 | NM_001004261 | 309381    | Pyroxd2      | pyridine nucleotide-disulphide oxidoreductase domain 2                                                                                          | 4.91E-01 | NS | 4.92E-01 | NS | 4.19E-02 | -1.7 |
| A_64_P113666  | NM_001099472 | 292547    | Vom2r28      | vomer nasal 2 receptor, 28                                                                                                                      | 7.23E-01 | NS | 4.47E-01 | NS | 1.75E-02 | -1.7 |

|               |              |        |            |                                                                                    |          |    |          |    |          |      |
|---------------|--------------|--------|------------|------------------------------------------------------------------------------------|----------|----|----------|----|----------|------|
| A_64_P014667  | NM_001107106 | 304061 | Brwd1      | bromodomain and WD repeat domain containing 1                                      | 5.73E-01 | NS | 3.29E-01 | NS | 4.88E-03 | -1.7 |
| A_44_P607722  | NM_001017487 | 498176 | Bri3bp     | Bri3 binding protein                                                               | 6.87E-01 | NS | 2.63E-01 | NS | 4.71E-02 | -1.7 |
| A_64_P118402  | NM_017071    | 24954  | Insr       | insulin receptor                                                                   | 6.86E-02 | NS | 4.37E-01 | NS | 3.03E-02 | -1.7 |
| A_64_P011389  | XM_574405    |        |            |                                                                                    | 6.56E-01 | NS | 8.65E-01 | NS | 2.61E-02 | -1.7 |
| A_64_P036770  |              | 307757 | Neto2      | neuropilin (NRP) and tolloid (TLL)-like 2 PAN2 polyA specific ribonuclease subunit | 7.02E-01 | NS | 2.40E-01 | NS | 3.25E-02 | -1.7 |
| A_44_P256457  | NM_001008862 | 408200 | Pan2       | homolog (S. cerevisiae)                                                            | 6.52E-01 | NS | 6.03E-01 | NS | 2.15E-02 | -1.7 |
| A_64_P142897  | NM_001108907 | 365194 | Cabp5      | calcium binding protein 5                                                          | 6.85E-01 | NS | 6.43E-01 | NS | 8.07E-03 | -1.7 |
| A_44_P424347  | NM_001106199 | 292101 | RGD1559496 | similar to hypothetical protein signal-induced proliferation-associated 1 like 3   | 6.68E-01 | NS | 4.83E-01 | NS | 3.07E-02 | -1.7 |
| A_64_P142809  | NM_001013066 | 292771 | Sipa113    | like 3                                                                             | 7.28E-01 | NS | 6.69E-01 | NS | 3.65E-02 | -1.7 |
| A_44_P368461  | NM_001107085 | 303861 | Cpn2       | carboxypeptidase N, polypeptide 2                                                  | 2.87E-01 | NS | 8.72E-01 | NS | 3.82E-02 | -1.7 |
| A_64_P086223  | EV763082     |        |            |                                                                                    | 2.74E-01 | NS | 5.55E-01 | NS | 3.16E-02 | -1.7 |
| A_44_P389178  | NM_001127541 | 309112 | Efcab4a    | EF-hand calcium binding domain 4A                                                  | 8.18E-01 | NS | 2.86E-01 | NS | 4.52E-02 | -1.7 |
| A_64_P145087  | NM_001127446 | 58834  | Dlc1       | deleted in liver cancer 1                                                          | 6.02E-01 | NS | 8.49E-01 | NS | 1.05E-02 | -1.7 |
| A_64_P121016  | NM_139043    | 245709 | Exoc8      | exocyst complex component 8                                                        | 4.39E-01 | NS | 7.29E-01 | NS | 3.84E-03 | -1.7 |
| A_42_P585155  | NM_053371    | 84384  | Fxc1       | fractured callus expressed transcript 1                                            | 1.51E-01 | NS | 7.93E-01 | NS | 2.27E-04 | -1.7 |
| A_64_P222609  | NM_172222    | 24231  | C2         | complement component 2                                                             | 5.29E-02 | NS | 8.45E-02 | NS | 2.42E-02 | -1.7 |
| A_44_P1035051 | NM_001107175 | 304799 | Ppp1r15b   | protein phosphatase 1, regulatory (inhibitor) subunit 15b                          | 6.63E-01 | NS | 9.33E-01 | NS | 8.33E-03 | -1.7 |
| A_42_P640992  | XM_002726274 | 311573 | Cep250     | centrosomal protein 250kDa                                                         | 6.68E-02 | NS | 9.88E-01 | NS | 4.91E-02 | -1.7 |
| A_44_P356962  | NM_001013155 | 309548 | Shoc2      | similar to RIKEN cDNA 1700081O22                                                   | 8.47E-02 | NS | 4.33E-01 | NS | 1.60E-02 | -1.7 |
| A_64_P249426  | NM_001014271 | 367515 | LOC367515  | similar to RIKEN cDNA 1700081O22                                                   | 5.55E-01 | NS | 8.55E-02 | NS | 3.33E-02 | -1.7 |
| A_64_P155290  | XM_001067315 |        |            |                                                                                    | 3.92E-01 | NS | 8.58E-01 | NS | 7.83E-04 | -1.7 |
| A_43_P19279   | XM_343507    | 363168 | Lyzl4      | lysozyme-like 4                                                                    | 2.52E-01 | NS | 1.52E-01 | NS | 3.52E-02 | -1.7 |
| A_64_P165451  | NM_001012121 | 315189 | Prr5       | proline rich 5 (renal)                                                             | 1.19E-01 | NS | 2.42E-01 | NS | 1.96E-02 | -1.7 |
| A_44_P371777  | NM_147207    | 259227 | Vof16      | ischemia related factor vof-16 cellular repressor of E1A-stimulated genes 1        | 1.18E-01 | NS | 5.51E-01 | NS | 9.39E-03 | -1.7 |
| A_64_P016901  | NM_001105966 | 289185 | Creg1      | 1                                                                                  | 9.17E-02 | NS | 1.02E-01 | NS | 1.23E-02 | -1.7 |
| A_44_P897442  | NM_012994    | 25501  | Nxph1      | neurexophilin 1                                                                    | 6.67E-01 | NS | 1.35E-01 | NS | 1.45E-02 | -1.7 |
| A_42_P601802  | NM_134465    | 171499 | Crif2      | cytokine receptor-like factor 2                                                    | 5.34E-02 | NS | 5.23E-01 | NS | 3.64E-02 | -1.7 |
| A_42_P459204  | NM_001014171 | 361954 | Veph1      | homolog 1 (zebrafish)                                                              | 8.35E-01 | NS | 5.43E-01 | NS | 1.06E-02 | -1.7 |
| A_64_P094940  | NM_001039101 | 317235 | Zdhc15     | zinc finger, DHHC-type containing 15                                               | 3.02E-01 | NS | 6.65E-01 | NS | 4.58E-02 | -1.7 |
| A_64_P088881  | XM_001062688 | 690180 | LOC690180  | hypothetical protein LOC690180 family with sequence similarity 13, member A1       | 7.44E-01 | NS | 1.01E-01 | NS | 5.31E-03 | -1.7 |
| A_44_P144988  | NM_001100862 | 362378 | Fam13a1    | A1                                                                                 | 4.04E-01 | NS | 8.34E-02 | NS | 1.21E-03 | -1.7 |
| A_64_P068524  | XM_219498    | 293631 | Brsk2      | brain serine/threonine kinase 2                                                    | 8.15E-01 | NS | 1.77E-01 | NS | 2.89E-02 | -1.7 |
| A_64_P023421  | NM_001107515 | 308632 | Hebp2      | heme binding protein 2                                                             | 1.82E-01 | NS | 9.26E-01 | NS | 2.77E-02 | -1.7 |
| A_64_P129478  | XM_001053483 |        |            |                                                                                    | 5.32E-01 | NS | 8.80E-01 | NS | 9.80E-03 | -1.7 |
| A_43_P19632   | NM_001047089 | 296072 | Spred1     | sprouty-related, EVH1 domain containing 1                                          | 1.65E-01 | NS | 9.93E-01 | NS | 5.13E-03 | -1.7 |
| A_43_P18782   | NM_001107882 | 312656 | 8-Mar      | membrane-associated ring finger (C3HC4) 8                                          | 5.12E-01 | NS | 6.06E-01 | NS | 2.00E-03 | -1.7 |
| A_42_P829349  | NM_001107249 | 305685 | Comtd1     | catechol-O-methyltransferase domain containing 1                                   | 2.59E-01 | NS | 7.74E-01 | NS | 2.25E-03 | -1.7 |
| A_44_P158957  | XM_002724787 | 288485 | Zfp853     | zinc finger protein 853                                                            | 1.11E-01 | NS | 8.33E-01 | NS | 3.94E-02 | -1.7 |
| A_64_P012193  | XM_001053731 |        |            |                                                                                    | 8.27E-01 | NS | 3.14E-01 | NS | 4.75E-02 | -1.7 |
| A_64_P162875  | NM_138516    | 171525 | Polk       | polymerase (DNA directed) kappa                                                    | 2.20E-01 | NS | 4.56E-01 | NS | 2.58E-03 | -1.7 |
| A_42_P803406  | NM_001107053 | 303563 | Nags       | N-acetylglutamate synthase                                                         | 3.79E-01 | NS | 5.01E-01 | NS | 9.16E-03 | -1.7 |
| A_43_P17493   | BC088210     |        |            |                                                                                    | 6.19E-01 | NS | 7.98E-02 | NS | 3.71E-02 | -1.7 |
| A_44_P1005199 | XM_001055013 | 299830 | Lrig3      | leucine-rich repeats and immunoglobulin-like domains 3                             | 7.81E-01 | NS | 6.24E-02 | NS | 4.33E-02 | -1.7 |
| A_64_P040381  | NM_133297    | 113922 | 15-Sep     | selenoprotein                                                                      | 7.62E-02 | NS | 5.43E-01 | NS | 1.28E-02 | -1.7 |
| A_64_P033959  | XM_001060143 | 311693 | Cdh26      | cadherin-like 26                                                                   | 5.58E-02 | NS | 9.89E-02 | NS | 2.39E-02 | -1.7 |
| A_43_P11610   | NM_012899    | 25374  | Alad       | aminolevulinate, delta-, dehydratase                                               | 1.71E-01 | NS | 9.56E-01 | NS | 5.96E-03 | -1.7 |

|              |              |           |              |                                                                                          |          |    |          |    |          |      |
|--------------|--------------|-----------|--------------|------------------------------------------------------------------------------------------|----------|----|----------|----|----------|------|
| A_64_P146692 | NM_012697    | 24904     | Slc22a1      | solute carrier family 22 (organic cation transporter), member 1                          | 8.30E-02 | NS | 6.10E-01 | NS | 4.24E-02 | -1.7 |
| A_44_P274083 | NM_173105    | 286758    | Aqp11        | aquaporin 11                                                                             | 7.86E-01 | NS | 3.39E-01 | NS | 4.37E-02 | -1.7 |
| A_42_P469751 | XM_001054007 | 117517    | C7           | complement component 7                                                                   | 5.29E-01 | NS | 1.44E-01 | NS | 2.98E-02 | -1.7 |
| A_64_P018626 | NM_173294    | 286953    | Cyp2b3       | cytochrome P450, family 2, subfamily b, polypeptide 3                                    | 6.02E-01 | NS | 8.61E-01 | NS | 2.75E-02 | -1.7 |
| A_44_P808057 | NM_001024782 | 311846    | Lrrc8a       | leucine rich repeat containing 8 family, member A                                        | 6.54E-02 | NS | 3.76E-01 | NS | 2.88E-03 | -1.7 |
| A_64_P155895 | NM_001009658 | 297332    | Thns12       | threonine synthase-like 2 (S. cerevisiae)                                                | 1.26E-01 | NS | 8.37E-01 | NS | 8.78E-03 | -1.7 |
| A_42_P550360 | NM_001013067 | 292866    | Klk1b21      | kallikrein 1-related peptidase b21                                                       | 7.99E-01 | NS | 1.60E-01 | NS | 2.61E-02 | -1.7 |
| A_64_P136542 | NM_019381    | 24822     | Tmbim6       | transmembrane BAX inhibitor motif containing 6                                           | 8.72E-02 | NS | 5.16E-01 | NS | 2.33E-02 | -1.7 |
| A_44_P867688 | XM_001060041 | 502510    | Ttc23l       | tetratricopeptide repeat domain 23-like                                                  | 7.17E-01 | NS | 2.50E-01 | NS | 3.26E-02 | -1.7 |
| A_64_P045171 | FM095807     |           |              |                                                                                          | 3.43E-01 | NS | 1.30E-01 | NS | 4.54E-03 | -1.7 |
| A_42_P840867 | XR_085743    | 100363987 | LOC100363987 | mCG114897-like                                                                           | 1.28E-01 | NS | 3.14E-01 | NS | 4.16E-02 | -1.7 |
| A_64_P102533 | NM_001109480 | 685756    | Tmem229a     | transmembrane protein 229A                                                               | 3.18E-01 | NS | 5.34E-01 | NS | 1.01E-02 | -1.7 |
| A_64_P061959 | NM_012898    | 25373     | Ahsg         | alpha-2-HS-glycoprotein                                                                  | 5.93E-01 | NS | 3.32E-01 | NS | 1.49E-02 | -1.7 |
| A_64_P122452 | NM_001025409 | 297893    | Hdac1        | histone deacetylase 1                                                                    | 5.17E-02 | NS | 7.27E-02 | NS | 4.07E-02 | -1.7 |
| A_64_P021855 | BC085354     | 499643    | LOC499643    | similar to hypothetical protein FLJ25371                                                 | 9.15E-01 | NS | 8.68E-02 | NS | 1.19E-02 | -1.7 |
| A_64_P085341 | NM_001108365 | 360973    | Gas2l1       | growth arrest-specific 2 like 1                                                          | 2.88E-01 | NS | 8.34E-01 | NS | 1.22E-02 | -1.7 |
| A_44_P231337 | NM_001001126 | 406053    | Olr637       | olfactory receptor 637                                                                   | 3.37E-01 | NS | 5.60E-02 | NS | 1.15E-02 | -1.7 |
| A_64_P143987 | XM_002724831 | 685030    | LOC685030    | similar to paired immunoglobulin-like type 2 receptor beta                               | 2.26E-01 | NS | 1.21E-01 | NS | 2.22E-02 | -1.7 |
| A_64_P154243 | NM_176861    | 294961    | Kcnmb2       | potassium large conductance calcium-activated channel, subfamily M, beta member 2        | 2.24E-01 | NS | 3.83E-01 | NS | 2.31E-02 | -1.7 |
| A_64_P164997 | XM_001079259 | 691684    | LOC691684    | similar to MIC2 like 1                                                                   | 1.01E-01 | NS | 1.92E-01 | NS | 7.82E-03 | -1.7 |
| A_64_P043036 | NM_001012746 | 362627    | Rcan3        | RCAN family member 3                                                                     | 1.81E-01 | NS | 9.38E-01 | NS | 3.05E-02 | -1.7 |
| A_64_P138984 | NM_001037581 | 652926    | Rhox10       | reproductive homeobox 10                                                                 | 1.92E-01 | NS | 2.83E-01 | NS | 4.36E-03 | -1.7 |
| A_64_P097881 | XM_002725357 |           |              |                                                                                          | 1.97E-01 | NS | 7.65E-01 | NS | 4.42E-02 | -1.7 |
| A_64_P028943 | NM_001127529 | 301525    | Glb1l        | galactosidase, beta 1-like                                                               | 5.27E-02 | NS | 9.03E-01 | NS | 3.63E-02 | -1.7 |
| A_64_P068433 | XM_001064312 | 685563    | LOC685563    | similar to Discs large homolog 5 (Placenta and prostate DLG) (Discs large protein P-dlg) | 2.59E-01 | NS | 2.55E-01 | NS | 5.41E-03 | -1.7 |
| A_64_P082017 | NM_001000104 | 290957    | Olr1653      | olfactory receptor 1653                                                                  | 3.41E-01 | NS | 8.28E-02 | NS | 3.60E-02 | -1.7 |
| A_44_P212602 | NM_001001035 | 405921    | Olr232       | olfactory receptor 232                                                                   | 4.52E-01 | NS | 4.18E-01 | NS | 3.69E-02 | -1.7 |
| A_64_P049096 | NM_024367    | 79208     | Epha5        | EphA5                                                                                    | 2.68E-01 | NS | 3.55E-01 | NS | 6.58E-03 | -1.7 |
| A_64_P281091 | NM_031788    | 83618     | Rest         | RE1-silencing transcription factor                                                       | 1.51E-01 | NS | 8.91E-01 | NS | 9.35E-03 | -1.7 |
| A_42_P463754 | NM_030994    | 25118     | Itga1        | integrin, alpha 1                                                                        | 9.13E-02 | NS | 4.11E-01 | NS | 5.72E-04 | -1.7 |
| A_64_P022452 | XM_001080758 | 691997    | Pebp4        | phosphatidylethanolamine binding protein 4                                               | 6.10E-01 | NS | 1.64E-01 | NS | 2.92E-02 | -1.7 |
| A_64_P062373 | NM_001128193 | 687208    | LOC687208    | similar to vacuolar protein sorting 37D                                                  | 3.25E-01 | NS | 6.53E-01 | NS | 3.95E-02 | -1.7 |
| A_64_P108279 | XM_001062130 | 685064    | LOC685064    | similar to spermatogenesis associated glutamate (E)-rich protein 4b                      | 4.07E-01 | NS | 8.30E-01 | NS | 1.38E-02 | -1.7 |
| A_44_P283715 | XM_002725015 | 305556    | Ehbp1        | EH domain binding protein 1                                                              | 5.08E-01 | NS | 1.46E-01 | NS | 1.41E-02 | -1.7 |
| A_42_P507035 | NM_001109236 | 500133    | Nod1         | nucleotide-binding oligomerization domain containing 1                                   | 8.49E-02 | NS | 1.10E-01 | NS | 8.48E-03 | -1.7 |
| A_44_P991864 | NM_053596    | 94204     | Ece1         | endothelin converting enzyme 1                                                           | 7.08E-01 | NS | 9.03E-01 | NS | 9.63E-03 | -1.7 |
| A_64_P026291 | NM_133305    | 140667    | Ap3m2        | adaptor-related protein complex 3, mu 2 subunit                                          | 2.05E-01 | NS | 5.75E-01 | NS | 8.42E-03 | -1.7 |
| A_64_P089280 | XM_002725003 |           |              |                                                                                          | 2.51E-01 | NS | 5.04E-01 | NS | 5.95E-03 | -1.7 |
| A_64_P152637 | XM_001054841 | 501592    | RGD1564177   | RGD1564177                                                                               | 8.82E-02 | NS | 4.25E-01 | NS | 4.95E-02 | -1.7 |
| A_64_P104548 | NM_019312    | 54260     | Itpkb        | inositol 1,4,5-trisphosphate 3-kinase B                                                  | 1.62E-01 | NS | 7.29E-01 | NS | 4.72E-02 | -1.7 |
| A_44_P436310 | XM_342133    | 361839    | RGD1562230   | similar to catenin alpha 3                                                               | 9.06E-01 | NS | 8.18E-02 | NS | 1.03E-02 | -1.6 |
| A_64_P147871 | FQ223062     |           |              |                                                                                          | 2.42E-01 | NS | 8.68E-01 | NS | 2.14E-02 | -1.6 |
| A_44_P456616 | NM_001000348 | 295875    | Olr668       | olfactory receptor 668                                                                   | 8.85E-01 | NS | 1.61E-01 | NS | 4.78E-02 | -1.6 |
| A_43_P18610  | NM_001107441 | 307926    | RGD1563235   | similar to 1700054N08Rik protein                                                         | 1.58E-01 | NS | 3.35E-01 | NS | 3.70E-02 | -1.6 |
| A_64_P065676 | NM_001108622 | 362342    | Hipk2        | homeodomain interacting protein kinase 2                                                 | 8.23E-02 | NS | 1.54E-01 | NS | 7.93E-03 | -1.6 |
| A_44_P100197 | NM_001009537 | 494339    | Zfp799       | zinc finger protein 799                                                                  | 1.45E-01 | NS | 5.49E-01 | NS | 6.00E-03 | -1.6 |

|               |              |           |            |                                                                                         |          |    |          |    |          |      |
|---------------|--------------|-----------|------------|-----------------------------------------------------------------------------------------|----------|----|----------|----|----------|------|
| A_64_P152261  | NM_001127526 | 298841    | RGD1311605 | similar to apoptosis related protein APR-3; p18 protein                                 | 8.87E-02 | NS | 6.24E-01 | NS | 2.61E-03 | -1.6 |
| A_64_P089370  | NM_178092    | 295645    | Slc4a10    | solute carrier family 4, sodium bicarbonate transporter, member 10                      | 1.51E-01 | NS | 3.03E-01 | NS | 2.08E-02 | -1.6 |
| A_64_P128433  | NM_001034998 | 619580    | Ctps2      | CTP synthase II                                                                         | 2.28E-01 | NS | 6.33E-01 | NS | 1.96E-02 | -1.6 |
| A_44_P638290  | NM_001024327 | 500110    | Znf467     | zinc finger protein 467                                                                 | 6.98E-01 | NS | 1.97E-01 | NS | 1.26E-02 | -1.6 |
| A_64_P165095  | XM_001056683 | 302639    | RGD1560267 | similar to ring finger protein 168                                                      | 5.26E-01 | NS | 8.54E-01 | NS | 2.69E-02 | -1.6 |
| A_64_P091268  | NM_001170475 | 361030    | RGD1562018 | similar to Protein C14orf101 homolog                                                    | 7.88E-01 | NS | 8.36E-01 | NS | 2.22E-02 | -1.6 |
| A_64_P088750  | NM_053831    | 116556    | Gucy2f     | guanylate cyclase 2F                                                                    | 2.18E-01 | NS | 4.69E-01 | NS | 2.68E-02 | -1.6 |
| A_64_P074310  | NM_001000300 | 295741    | Olr470     | olfactory receptor 470                                                                  | 1.49E-01 | NS | 6.28E-02 | NS | 4.46E-02 | -1.6 |
| A_64_P099432  | XM_001071227 |           |            |                                                                                         | 7.15E-01 | NS | 1.26E-01 | NS | 4.03E-02 | -1.6 |
| A_64_P090866  | NM_012719    | 25033     | Sstr1      | somatostatin receptor 1                                                                 | 7.41E-01 | NS | 3.06E-01 | NS | 4.79E-02 | -1.6 |
| A_64_P000328  | NM_001109633 | 691277    | LOC691277  | similar to Robo-1                                                                       | 6.55E-01 | NS | 1.53E-01 | NS | 4.75E-02 | -1.6 |
| A_43_P15556   | NM_022220    | 60671     | Gulo       | gulonolactone (L-) oxidase                                                              | 2.40E-01 | NS | 1.46E-01 | NS | 1.34E-02 | -1.6 |
| A_64_P101774  | NM_001000440 | 300548    | Olr1222    | olfactory receptor 1222                                                                 | 1.39E-01 | NS | 8.13E-01 | NS | 1.03E-02 | -1.6 |
| A_64_P021241  | NM_139259    | 246143    | Nradd      | neurotrophin receptor associated death domain                                           | 3.67E-01 | NS | 3.79E-01 | NS | 2.39E-02 | -1.6 |
| A_44_P1027971 | NM_001109509 | 688730    | Gpr84      | G protein-coupled receptor 84                                                           | 9.55E-01 | NS | 5.40E-01 | NS | 5.62E-03 | -1.6 |
| A_64_P022283  | NM_001025628 | 288053    | Ropn1      | ropporin, rhophilin associated protein 1                                                | 3.94E-01 | NS | 3.72E-01 | NS | 2.69E-02 | -1.6 |
| A_64_P114903  | NM_001106561 | 296599    | RGD1311501 | similar to chromosome 9 open reading frame 7                                            | 1.42E-01 | NS | 6.42E-01 | NS | 2.85E-03 | -1.6 |
| A_64_P045646  | XM_001076514 | 691014    | Dppa3l1    | developmental pluripotency associated 3-like 1                                          | 2.85E-01 | NS | 4.68E-01 | NS | 2.35E-02 | -1.6 |
| A_64_P008450  | XM_221384    |           |            |                                                                                         | 5.48E-01 | NS | 7.61E-01 | NS | 3.38E-02 | -1.6 |
| A_42_P674742  | XM_002726367 | 685879    | Jazf1      | JAZF zinc finger 1                                                                      | 3.00E-01 | NS | 7.51E-01 | NS | 9.14E-03 | -1.6 |
| A_44_P212521  | NM_153466    | 266704    | Gzmf       | granzyme F                                                                              | 4.94E-01 | NS | 2.35E-01 | NS | 7.42E-03 | -1.6 |
| A_44_P547892  | NM_001000753 | 405023    | Olr1345    | olfactory receptor 1345                                                                 | 5.98E-02 | NS | 9.29E-01 | NS | 1.35E-02 | -1.6 |
| A_64_P047993  | XM_001063469 | 685357    | Baiap2l2   | BAL1-associated protein 2-like 2                                                        | 7.14E-01 | NS | 7.57E-01 | NS | 2.88E-02 | -1.6 |
| A_64_P024232  | NM_001106727 | 299016    | Npas3      | neuronal PAS domain protein 3                                                           | 8.42E-02 | NS | 4.56E-01 | NS | 4.37E-02 | -1.6 |
| A_44_P114500  | NM_001037210 | 365960    | Gipc2      | GIPC PDZ domain containing family, member 2                                             | 1.13E-01 | NS | 4.44E-01 | NS | 2.75E-02 | -1.6 |
| A_44_P836794  | XM_001063933 | 498073    | Ccdc54     | coiled-coil domain containing 54                                                        | 3.69E-01 | NS | 5.47E-01 | NS | 4.46E-02 | -1.6 |
| A_64_P090299  | XM_001055022 | 679168    | LOC679168  | hypothetical protein LOC679168                                                          | 6.92E-01 | NS | 4.23E-01 | NS | 2.40E-02 | -1.6 |
| A_44_P557273  | NM_001000793 | 405077    | Olr1316    | olfactory receptor 1316                                                                 | 7.09E-02 | NS | 7.62E-01 | NS | 7.88E-03 | -1.6 |
| A_44_P103082  | XM_001064403 | 302612    | Tspyl2     | TSPY-like 2                                                                             | 1.74E-01 | NS | 4.20E-01 | NS | 3.56E-02 | -1.6 |
| A_64_P033924  | NM_001107196 | 304962    | Atf6       | activating transcription factor 6                                                       | 2.33E-01 | NS | 2.39E-01 | NS | 5.46E-03 | -1.6 |
| A_44_P271769  | NM_016988    | 24162     | Acp2       | acid phosphatase 2, lysosomal                                                           | 1.79E-01 | NS | 1.71E-01 | NS | 4.01E-03 | -1.6 |
| A_44_P840715  | NM_001007704 | 313843    | Galm       | galactose mutarotase (aldose 1-epimerase)                                               | 2.80E-01 | NS | 1.53E-01 | NS | 1.13E-02 | -1.6 |
| A_64_P028011  | NM_001106188 | 292041    | Wwox       | WW domain-containing oxidoreductase                                                     | 1.90E-01 | NS | 3.82E-01 | NS | 3.24E-02 | -1.6 |
| A_44_P535284  | NM_030850    | 81508     | Bhmt       | betaine-homocysteine methyltransferase                                                  | 2.01E-01 | NS | 7.38E-01 | NS | 1.06E-02 | -1.6 |
| A_64_P103238  | NM_001014158 | 361487    | Zfp52      | zinc finger protein 52                                                                  | 2.74E-01 | NS | 6.63E-01 | NS | 1.17E-02 | -1.6 |
| A_64_P130174  | NM_023970    | 66026     | Trpv4      | transient receptor potential cation channel, subfamily V, member 4                      | 1.01E-01 | NS | 2.88E-01 | NS | 3.95E-02 | -1.6 |
| A_43_P17757   | NM_133287    | 29419     | Numb       | numb homolog (Drosophila)                                                               | 6.27E-02 | NS | 8.02E-01 | NS | 5.79E-03 | -1.6 |
| A_64_P004705  | NM_001011974 | 298024    | Akap2      | A kinase (PRKA) anchor protein 2                                                        | 2.63E-01 | NS | 7.90E-01 | NS | 4.79E-03 | -1.6 |
| A_64_P067098  | XM_001065135 | 306718    | RGD1564657 | similar to cathepsin 1 precursor                                                        | 7.93E-01 | NS | 2.64E-01 | NS | 1.19E-02 | -1.6 |
| A_64_P058432  | NM_001160263 | 100301568 | Abo2       | histo-blood group ABO system transferase 2                                              | 2.02E-01 | NS | 9.98E-01 | NS | 2.08E-02 | -1.6 |
| A_44_P937601  | XR_007251    | 306096    | LOC306096  | similar to Dachshund homolog 1 (Dach1)                                                  | 8.71E-02 | NS | 9.34E-01 | NS | 2.05E-02 | -1.6 |
| A_43_P14812   | XM_001080074 | 308986    | Tmem219    | transmembrane protein 219                                                               | 1.05E-01 | NS | 3.90E-01 | NS | 1.83E-02 | -1.6 |
| A_44_P445712  | XM_001062396 |           |            |                                                                                         | 7.91E-02 | NS | 7.29E-01 | NS | 1.04E-02 | -1.6 |
| A_64_P043614  | NM_001108728 | 362812    | Slc39a5    | solute carrier family 39 (metal ion transporter), member 5                              | 1.16E-01 | NS | 9.66E-01 | NS | 8.09E-03 | -1.6 |
| A_44_P147328  | XM_002726151 |           |            |                                                                                         | 6.06E-01 | NS | 5.28E-01 | NS | 1.75E-02 | -1.6 |
| A_64_P123695  | NM_001100860 | 361836    | Slc25a16   | solute carrier family 25 (mitochondrial carrier, Graves disease autoantigen), member 16 | 9.91E-02 | NS | 6.29E-01 | NS | 1.14E-03 | -1.6 |
| A_64_P160437  | XM_002726367 | 685879    | Jazf1      | JAZF zinc finger 1                                                                      | 2.31E-01 | NS | 5.22E-01 | NS | 2.40E-02 | -1.6 |



|               |              |        |            |                                                                                                                             |          |    |          |    |          |      |
|---------------|--------------|--------|------------|-----------------------------------------------------------------------------------------------------------------------------|----------|----|----------|----|----------|------|
| A_64_P160586  | NM_019331    | 54281  | Furin      | furin (paired basic amino acid cleaving enzyme)                                                                             | 1.62E-01 | NS | 5.41E-01 | NS | 2.03E-02 | -1.6 |
| A_64_P057924  | NM_001085404 | 689790 | Clec2d11   | C-type lectin domain family 2 member d-like 1                                                                               | 1.28E-01 | NS | 6.08E-01 | NS | 3.08E-02 | -1.6 |
| A_44_P379805  | NM_001135013 | 293117 | Ankrd42    | ankyrin repeat domain 42                                                                                                    | 7.59E-01 | NS | 4.05E-01 | NS | 4.89E-02 | -1.6 |
| A_64_P055472  | NM_001109584 | 690366 | Vangl1     | vang-like 1 (van gogh, Drosophila)                                                                                          | 1.86E-01 | NS | 5.24E-01 | NS | 6.68E-03 | -1.6 |
| A_44_P345298  | NM_012835    | 25305  | Cort       | cortistatin                                                                                                                 | 1.50E-01 | NS | 1.44E-01 | NS | 4.92E-02 | -1.6 |
| A_64_P019636  | AY539932     |        |            |                                                                                                                             | 7.80E-02 | NS | 5.04E-02 | NS | 3.20E-03 | -1.6 |
| A_64_P054676  | NM_001130556 | 315388 | Tmprss6    | transmembrane protease, serine 6 zinc binding alcohol dehydrogenase, domain containing 2                                    | 1.31E-01 | NS | 9.36E-01 | NS | 1.47E-02 | -1.6 |
| A_44_P732517  | NM_001106129 | 291403 | Zadh2      |                                                                                                                             | 8.76E-01 | NS | 5.52E-01 | NS | 3.29E-02 | -1.6 |
| A_44_P105069  | NM_001108902 | 365042 | Rab32      | RAB32, member RAS oncogene family                                                                                           | 4.77E-01 | NS | 2.50E-01 | NS | 1.16E-02 | -1.6 |
| A_44_P519620  | NM_001105735 | 65161  | Litaf      | lipopolysaccharide-induced TNF factor glucosaminyl (N-acetyl) transferase 2, l-branching enzyme                             | 6.60E-01 | NS | 2.18E-01 | NS | 4.63E-02 | -1.6 |
| A_64_P038478  | NM_001001511 | 306860 | Gcnt2      |                                                                                                                             | 1.86E-01 | NS | 5.50E-01 | NS | 1.26E-02 | -1.6 |
| A_64_P097854  | XM_001081513 |        |            |                                                                                                                             | 4.43E-01 | NS | 5.02E-01 | NS | 2.96E-03 | -1.6 |
| A_64_P174571  | NM_138914    | 192348 | Fnbp1      | formin binding protein 1                                                                                                    | 1.30E-01 | NS | 3.28E-01 | NS | 1.94E-02 | -1.6 |
| A_64_P092201  | AF202115     | 24268  | Cp         | ceruloplasmin                                                                                                               | 7.98E-01 | NS | 8.50E-01 | NS | 5.18E-03 | -1.6 |
| A_64_P004974  | NM_017333    | 50672  | Ednrb      | endothelin receptor type B                                                                                                  | 8.66E-02 | NS | 2.02E-01 | NS | 3.26E-02 | -1.6 |
| A_42_P599074  | NM_001047907 | 361814 | Sfrs3      | splicing factor, arginine/serine-rich 3                                                                                     | 1.30E-01 | NS | 1.45E-01 | NS | 3.66E-02 | -1.6 |
| A_44_P140266  | NM_001107707 | 310732 | Slc22a15   | solute carrier family 22, member 15 solute carrier family 25 (mitochondrial carrier, Graves disease autoantigen), member 16 | 1.46E-01 | NS | 9.04E-01 | NS | 3.20E-02 | -1.6 |
| A_42_P542773  | NM_001100860 | 361836 | Slc25a16   |                                                                                                                             | 2.10E-01 | NS | 2.73E-01 | NS | 3.96E-02 | -1.6 |
| A_44_P153709  | NR_003527    | 364128 | Dzip1-ps1  | DAZ interacting protein 1, pseudogene 1                                                                                     | 6.96E-01 | NS | 9.47E-01 | NS | 2.88E-02 | -1.6 |
| A_44_P527376  | NM_001106300 | 293526 | Ate1       | arginyltransferase 1 solute carrier family 16, member 2 (monocarboxylic acid transporter 8)                                 | 5.52E-01 | NS | 3.42E-01 | NS | 1.11E-02 | -1.6 |
| A_64_P074046  | NM_147216    | 259248 | Slc16a2    |                                                                                                                             | 2.40E-01 | NS | 6.48E-01 | NS | 2.44E-02 | -1.6 |
| A_64_P399127  | CB803572     |        |            |                                                                                                                             | 2.73E-01 | NS | 3.75E-01 | NS | 2.67E-02 | -1.6 |
| A_43_P14432   | NM_001106826 | 300754 | Bbs4       | Bardet-Biedl syndrome 4                                                                                                     | 2.30E-01 | NS | 3.49E-01 | NS | 3.26E-02 | -1.6 |
| A_44_P447344  | NM_030840    | 83819  | Slc26a5    | solute carrier family 26, member 5 (prestin) vitamin K epoxide reductase complex, subunit 1                                 | 1.54E-01 | NS | 8.87E-01 | NS | 3.99E-02 | -1.6 |
| A_43_P10257   | NM_203335    | 309004 | Vkorc1     | poly (ADP-ribose) polymerase family, member 14                                                                              | 1.10E-01 | NS | 4.11E-01 | NS | 5.11E-03 | -1.6 |
| A_64_P024419  | XM_001071334 | 303903 | Parp14     |                                                                                                                             | 2.04E-01 | NS | 4.76E-01 | NS | 2.43E-02 | -1.6 |
| A_64_P105556  | NM_001113779 | 307920 | Pabpn1     | poly(A)binding protein nuclear 1-like leucine rich repeat and coiled-coil domain containing 1                               | 1.84E-01 | NS | 6.73E-02 | NS | 2.29E-02 | -1.6 |
| A_44_P180147  | NM_001100645 | 266808 | Lrrcc1     |                                                                                                                             | 1.50E-01 | NS | 2.34E-01 | NS | 1.39E-02 | -1.6 |
| A_44_P344519  | NM_001107123 | 304302 | Zfp469     | zinc finger protein 469                                                                                                     | 1.75E-01 | NS | 7.94E-01 | NS | 1.44E-02 | -1.6 |
| A_64_P074715  | XM_001071139 | 500996 | Layn       | layilin                                                                                                                     | 6.72E-01 | NS | 7.22E-01 | NS | 4.50E-03 | -1.6 |
| A_64_P094666  | XM_576913    | 501512 | RGD1559731 | similar to RIKEN cDNA 4930578C19 IQ motif containing GTPase activating protein 1                                            | 7.22E-01 | NS | 1.28E-01 | NS | 1.97E-02 | -1.6 |
| A_44_P424087  | NM_001108489 | 361598 | Iqgap1     |                                                                                                                             | 5.66E-02 | NS | 7.01E-01 | NS | 5.71E-03 | -1.6 |
| A_64_P004725  | NM_001001801 | 361458 | Akap7      | A kinase (PRKA) anchor protein 7                                                                                            | 1.69E-01 | NS | 3.00E-01 | NS | 2.15E-02 | -1.6 |
| A_44_P263015  | NM_001130542 | 299940 | Sntb1      | syntrophin, beta 1 EGF-containing fibulin-like extracellular matrix protein 2                                               | 9.94E-01 | NS | 2.26E-01 | NS | 1.52E-02 | -1.6 |
| A_64_P086655  | NM_001005907 | 293677 | Efemp2     |                                                                                                                             | 7.48E-02 | NS | 5.51E-01 | NS | 1.92E-02 | -1.6 |
| A_64_P012927  | NM_001109534 | 689374 | Tktl1      | transketolase-like 1                                                                                                        | 1.59E-01 | NS | 6.72E-01 | NS | 3.51E-02 | -1.6 |
| A_44_P511516  | NM_001105880 | 288105 | Zbtb20     | zinc finger and BTB domain containing 20 phosphatidylinositol glycan anchor biosynthesis, class H                           | 8.38E-01 | NS | 7.36E-01 | NS | 7.59E-03 | -1.6 |
| A_64_P143971  | NM_001108714 | 362756 | Pigh       |                                                                                                                             | 1.61E-01 | NS | 1.87E-01 | NS | 3.80E-02 | -1.6 |
| A_44_P1025454 | NM_001034131 | 297480 | Foxp1      | forkhead box P1                                                                                                             | 2.83E-01 | NS | 5.97E-01 | NS | 2.10E-03 | -1.6 |
| A_44_P196717  | NM_001108922 | 365381 | Stk32c     | serine/threonine kinase 32C                                                                                                 | 3.78E-01 | NS | 2.08E-01 | NS | 2.70E-02 | -1.6 |
| A_42_P683840  | NM_001108660 | 362505 | Ccl27      | chemokine (C-C motif) ligand 27                                                                                             | 4.58E-01 | NS | 7.62E-01 | NS | 1.03E-02 | -1.6 |
| A_43_P15761   | NM_031608    | 50592  | Gria1      | glutamate receptor, ionotropic, AMPA 1                                                                                      | 3.76E-01 | NS | 9.48E-01 | NS | 3.64E-02 | -1.6 |
| A_44_P464237  | NM_001134598 | 367734 | RGD1563155 | similar to RIKEN cDNA 1700054O13 potassium channel tetramerisation domain containing 1                                      | 8.17E-02 | NS | 1.43E-01 | NS | 4.93E-03 | -1.6 |
| A_44_P1028952 | XM_001062225 | 291772 | Kctd1      |                                                                                                                             | 1.76E-01 | NS | 9.02E-01 | NS | 2.03E-02 | -1.6 |

|               |              |           |              |                                                                                                                                                    |          |    |          |    |          |      |
|---------------|--------------|-----------|--------------|----------------------------------------------------------------------------------------------------------------------------------------------------|----------|----|----------|----|----------|------|
| A_64_P119284  | XR_086238    | 502876    | LOC502876    | similar to protein phosphatase 1, regulatory subunit 15B                                                                                           | 4.13E-01 | NS | 9.60E-01 | NS | 1.90E-02 | -1.6 |
| A_44_P667524  | NM_001127562 | 499630    | RGD1565059   | similar to hypothetical protein E130311K13                                                                                                         | 1.70E-01 | NS | 8.30E-01 | NS | 2.17E-02 | -1.6 |
| A_44_P335679  | NM_001108168 | 315824    | Bmp5         | bone morphogenetic protein 5                                                                                                                       | 5.33E-02 | NS | 1.69E-01 | NS | 4.43E-02 | -1.6 |
| A_64_P016508  | NM_001000083 | 289251    | Olr1589      | olfactory receptor 1589                                                                                                                            | 1.09E-01 | NS | 1.86E-01 | NS | 4.69E-02 | -1.6 |
| A_44_P516144  | NM_001107011 | 303244    | Mpdu1        | mannose-P-dolichol utilization defect 1 eukaryotic translation initiation factor 2 alpha kinase 3 signal-induced proliferation-associated 1 like 1 | 7.86E-02 | NS | 5.31E-01 | NS | 2.59E-02 | -1.6 |
| A_42_P629500  | NM_031599    | 29702     | Eif2ak3      | alpha kinase 3 signal-induced proliferation-associated 1 like 1                                                                                    | 1.44E-01 | NS | 9.16E-01 | NS | 4.31E-02 | -1.6 |
| A_64_P152993  | NM_139330    | 246212    | Sipa11       |                                                                                                                                                    | 1.29E-01 | NS | 7.16E-01 | NS | 3.92E-02 | -1.6 |
| A_64_P070791  | AY321323     |           |              |                                                                                                                                                    | 6.99E-01 | NS | 5.50E-02 | NS | 4.06E-02 | -1.6 |
| A_42_P700817  | NM_080576    | 140638    | Apoa5        | apolipoprotein A-V CDC42 binding protein kinase gamma (DMPK-like)                                                                                  | 1.85E-01 | NS | 5.97E-01 | NS | 2.79E-02 | -1.6 |
| A_64_P069211  | NM_001130013 | 293693    | Cdc42bpg     | (DMPK-like)                                                                                                                                        | 1.13E-01 | NS | 3.71E-01 | NS | 2.48E-02 | -1.6 |
| A_44_P557376  | NM_012546    | 24316     | Drd1a        | dopamine receptor D1A                                                                                                                              | 7.93E-01 | NS | 7.98E-02 | NS | 4.93E-02 | -1.6 |
| A_64_P058876  | XM_002729057 | 100361404 | LOC100361404 | hypothetical protein LOC100361404                                                                                                                  | 1.09E-01 | NS | 6.17E-01 | NS | 2.55E-02 | -1.6 |
| A_44_P454961  | NM_001108253 | 317425    | RGD1561065   | similar to mKIAA1111 protein                                                                                                                       | 5.28E-02 | NS | 8.04E-01 | NS | 1.39E-02 | -1.6 |
| A_64_P129730  | NM_001033896 | 310626    | Tmem79       | transmembrane protein 79                                                                                                                           | 1.47E-01 | NS | 5.26E-01 | NS | 3.90E-02 | -1.6 |
| A_64_P027508  | NM_001190372 | 498823    | Ankrd29      | ankyrin repeat domain 29                                                                                                                           | 7.90E-01 | NS | 3.75E-01 | NS | 1.71E-02 | -1.6 |
| A_64_P119876  | NM_001109211 | 499952    | Bhlhe23      | basic helix-loop-helix family, member e23 alpha thalassemia/mental retardation syndrome X-linked (RAD54 homolog, S. cerevisiae)                    | 6.92E-02 | NS | 8.50E-01 | NS | 3.27E-02 | -1.6 |
| A_64_P089125  | NM_001105757 | 246284    | Atrx         | solute carrier family 7 (cationic amino acid transporter, y+ system), member 12                                                                    | 7.18E-02 | NS | 6.57E-01 | NS | 3.93E-03 | -1.6 |
| A_64_P048908  | NM_001011948 | 294881    | Slc7a12      | calponin 3, acidic                                                                                                                                 | 2.26E-01 | NS | 2.66E-01 | NS | 5.33E-03 | -1.6 |
| A_44_P1029956 | NM_019359    | 54321     | Cnn3         | similar to purinergic receptor P2Y, G-protein coupled, 4                                                                                           | 2.87E-01 | NS | 3.34E-01 | NS | 2.35E-02 | -1.6 |
| A_64_P057491  | XM_001065668 | 310487    | LOC310487    | potassium voltage-gated channel, subfamily H (eag-related), member 3                                                                               | 6.27E-01 | NS | 1.74E-01 | NS | 2.95E-02 | -1.6 |
| A_64_P082668  | NM_017108    | 27150     | Kcnh3        | ArfGAP with coiled-coil, ankyrin repeat and PH domains 2                                                                                           | 1.58E-01 | NS | 6.33E-01 | NS | 3.62E-02 | -1.6 |
| A_64_P100869  | NM_001034006 | 619382    | Acap2        | similar to HT021                                                                                                                                   | 4.70E-01 | NS | 7.10E-01 | NS | 2.38E-02 | -1.6 |
| A_64_P053601  | NM_001106026 | 289928    | RGD1306063   | nuclear transport factor 2-like export factor 2                                                                                                    | 6.71E-02 | NS | 8.33E-01 | NS | 3.85E-03 | -1.6 |
| A_44_P166310  | NM_001108120 | 315352    | Nxt2         | protein tyrosine phosphatase-like A domain containing 2                                                                                            | 2.76E-01 | NS | 9.76E-01 | NS | 2.42E-02 | -1.6 |
| A_44_P508935  | NM_001108669 | 362540    | Ptplad2      | dolichyl-phosphate mannosyltransferase polypeptide 3                                                                                               | 9.45E-01 | NS | 1.90E-01 | NS | 2.30E-02 | -1.6 |
| A_64_P014189  | NM_001109331 | 502017    | Dpm3         | mannosyl (beta-1,4-)-glycoprotein beta-1,4-N-acetylglucosaminyltransferase                                                                         | 9.21E-02 | NS | 9.43E-01 | NS | 8.29E-03 | -1.6 |
| A_64_P072189  | NM_019239    | 29582     | Mgat3        | H6 family homeobox 2                                                                                                                               | 5.51E-01 | NS | 4.49E-01 | NS | 3.46E-02 | -1.6 |
| A_64_P072103  | NM_001106303 | 293538    | Hmx2         | similar to alanine-glyoxylate aminotransferase 2-like 1                                                                                            | 3.16E-01 | NS | 6.60E-01 | NS | 3.70E-02 | -1.6 |
| A_64_P011639  | XM_001076965 | 687071    | LOC687071    | hairly and enhancer of split 1 (Drosophila)                                                                                                        | 2.44E-01 | NS | 2.38E-01 | NS | 1.42E-02 | -1.6 |
| A_64_P054708  | NM_024360    | 29577     | Hes1         | sema domain, immunoglobulin domain (Ig), short basic domain, secreted, (semaphorin) 3G                                                             | 2.17E-01 | NS | 1.50E-01 | NS | 4.76E-02 | -1.6 |
| A_64_P080896  | NM_001100882 | 290562    | Sema3g       | solute carrier family 12 (sodium/chloride transporters), member 3                                                                                  | 2.92E-01 | NS | 8.73E-01 | NS | 9.92E-03 | -1.6 |
| A_64_P015618  | NM_019345    | 54300     | Slc12a3      | C-reactive protein, pentraxin-related                                                                                                              | 5.31E-01 | NS | 7.94E-01 | NS | 8.66E-03 | -1.6 |
| A_44_P252529  | NM_017096    | 25419     | Crp          | casein kinase 1, epsilon                                                                                                                           | 5.81E-01 | NS | 1.33E-01 | NS | 2.65E-02 | -1.6 |
| A_42_P515454  | NM_031617    | 58822     | Csnk1e       | adenylate cyclase 6                                                                                                                                | 4.18E-01 | NS | 6.42E-01 | NS | 1.83E-02 | -1.6 |
| A_43_P11576   | NM_012821    | 25289     | Adcy6        | Leber congenital amaurosis 5-like transmembrane and coiled-coil domain family 3                                                                    | 1.72E-01 | NS | 8.51E-01 | NS | 3.36E-03 | -1.6 |
| A_44_P974179  | NM_001017484 | 498065    | Lca5l        | UDP-Gal:betaGlcNAc beta 1,4-galactosyltransferase, polypeptide 6                                                                                   | 1.38E-01 | NS | 6.78E-01 | NS | 4.31E-02 | -1.6 |
| A_44_P227510  | NM_001108084 | 314751    | Tmcc3        | RAP1, GTP-GDP dissociation stimulator 1                                                                                                            | 8.00E-01 | NS | 1.03E-01 | NS | 2.79E-02 | -1.6 |
| A_44_P502287  | NM_031740    | 65196     | B4galt6      |                                                                                                                                                    | 1.50E-01 | NS | 7.83E-01 | NS | 1.08E-02 | -1.6 |
| A_44_P384531  | NM_001107728 | 310909    | Rap1gds1     |                                                                                                                                                    | 2.63E-01 | NS | 9.57E-01 | NS | 1.75E-02 | -1.6 |

|               |              |           |              |                                                                                                   |          |    |          |    |          |      |
|---------------|--------------|-----------|--------------|---------------------------------------------------------------------------------------------------|----------|----|----------|----|----------|------|
| A_44_P548303  | NM_001009688 | 309041    | Thumpd1      | THUMP domain containing 1                                                                         | 1.12E-01 | NS | 3.00E-01 | NS | 3.42E-02 | -1.6 |
| A_64_P069596  | XM_001054763 | 679859    | LOC679859    | hypothetical protein LOC679859                                                                    | 3.87E-01 | NS | 4.47E-01 | NS | 2.13E-02 | -1.6 |
| A_64_P070816  | NM_001077585 | 685814    | Cnpy2        | canopy 2 homolog (zebrafish)                                                                      | 1.17E-01 | NS | 2.14E-01 | NS | 2.19E-02 | -1.6 |
| A_44_P310581  | BG673348     |           |              | Immunoglobulin lambda-like polypeptide 1-like                                                     | 3.98E-01 | NS | 3.80E-01 | NS | 6.51E-03 | -1.6 |
| A_64_P062275  | NM_001190341 | 100360919 | LOC100360919 | myeloid/lymphoid or mixed-lineage leukemia 5 (trithorax homolog, Drosophila)                      | 7.85E-01 | NS | 9.71E-01 | NS | 2.71E-02 | -1.6 |
| A_64_P029427  | XM_001059700 | 311968    | Mll5         |                                                                                                   | 1.98E-01 | NS | 9.29E-01 | NS | 1.04E-02 | -1.6 |
| A_64_P018952  | XM_002726444 |           |              |                                                                                                   | 2.32E-01 | NS | 7.60E-01 | NS | 7.32E-03 | -1.6 |
| A_64_P043584  | XM_001081768 |           |              |                                                                                                   | 2.70E-01 | NS | 1.45E-01 | NS | 4.57E-02 | -1.6 |
| A_64_P134927  | NM_001008884 | 294270    | RT1-Db1      | RT1 class II, locus Db1                                                                           | 8.93E-01 | NS | 4.91E-01 | NS | 1.57E-02 | -1.6 |
| A_42_P829762  | NM_001107933 | 313234    | Tbc1d2       | TBC1 domain family, member 2                                                                      | 2.04E-01 | NS | 2.44E-01 | NS | 3.48E-02 | -1.6 |
| A_42_P739079  | NM_001014274 | 367903    | Armxc2       | armadillo repeat containing, X-linked 2                                                           | 1.46E-01 | NS | 9.20E-01 | NS | 1.31E-02 | -1.6 |
| A_64_P079945  | XM_002726024 |           |              |                                                                                                   | 5.14E-02 | NS | 8.17E-01 | NS | 9.20E-03 | -1.6 |
| A_64_P040080  | NM_001129881 | 686999    | LOC686999    | similar to M phase phosphoprotein 6                                                               | 8.74E-02 | NS | 2.82E-01 | NS | 7.46E-03 | -1.6 |
| A_64_P096782  | NM_001025041 | 499772    | ler5l        | immediate early response 5-like                                                                   | 6.52E-02 | NS | 9.38E-01 | NS | 3.03E-03 | -1.6 |
| A_44_P1048315 | NM_001014005 | 306587    | Tcta         | T-cell leukemia translocation altered gene                                                        | 2.26E-01 | NS | 7.71E-01 | NS | 4.45E-02 | -1.6 |
| A_64_P101797  | NM_001107328 | 306636    | Efnb2        | ephrin B2                                                                                         | 6.82E-01 | NS | 4.89E-01 | NS | 1.99E-02 | -1.6 |
| A_64_P030761  | NM_001106861 | 301020    | Smarcc1      | SWI/SNF related, matrix associated, actin dependent regulator of chromatin, subfamily c, member 1 | 1.44E-01 | NS | 8.72E-01 | NS | 3.03E-02 | -1.6 |
| A_64_P038634  | XM_001056541 |           |              |                                                                                                   | 3.47E-01 | NS | 7.90E-01 | NS | 4.61E-02 | -1.6 |
| A_42_P686916  | XM_001054229 | 300822    | Tex9         | testis expressed gene 9                                                                           | 1.65E-01 | NS | 4.17E-01 | NS | 4.21E-02 | -1.6 |
| A_44_P454426  | AF133906     |           |              |                                                                                                   | 8.37E-01 | NS | 7.46E-01 | NS | 1.57E-03 | -1.6 |
| A_64_P150509  | NM_001108836 | 363682    | Ccr10        | chemokine (C-C motif) receptor 10                                                                 | 8.53E-01 | NS | 7.61E-01 | NS | 4.36E-02 | -1.6 |
| A_44_P387246  | NM_001108761 | 363067    | Sin3a        | SIN3 homolog A, transcription regulator (yeast)                                                   | 5.20E-01 | NS | 6.04E-01 | NS | 4.28E-03 | -1.6 |
| A_64_P024630  | DV716357     |           |              |                                                                                                   | 2.99E-01 | NS | 8.92E-01 | NS | 4.76E-02 | -1.6 |
| A_44_P1021808 | XM_340757    | 360483    | RGD1561796   | RGD1561796                                                                                        | 2.97E-01 | NS | 5.35E-01 | NS | 1.93E-02 | -1.6 |
| A_64_P155504  | NM_001135720 | 688452    | LOC688452    | hypothetical protein LOC688452                                                                    | 2.38E-01 | NS | 7.31E-01 | NS | 3.50E-02 | -1.6 |
| A_64_P038317  | NM_001101020 | 691471    | Slc2a7       | solute carrier family 2 (facilitated glucose transporter), member 7                               | 6.20E-01 | NS | 1.09E-01 | NS | 4.24E-02 | -1.6 |
| A_64_P141090  | NM_001014033 | 309891    | 10-Sep       | septin 10                                                                                         | 6.32E-01 | NS | 8.69E-02 | NS | 4.07E-02 | -1.6 |
| A_64_P086448  | NM_001008819 | 450227    | Krt33b       | keratin 33B                                                                                       | 1.33E-01 | NS | 3.47E-01 | NS | 3.46E-02 | -1.6 |
| A_43_P23041   | NM_001108556 | 361979    | RGD1304953   | similar to SSTK-interacting protein                                                               | 3.22E-01 | NS | 9.36E-01 | NS | 4.60E-02 | -1.6 |
| A_64_P023975  | XM_001079524 | 287441    | Zbtb4        | zinc finger and BTB domain containing 4                                                           | 1.74E-01 | NS | 7.99E-01 | NS | 5.68E-03 | -1.6 |
| A_43_P23288   | NM_001109242 | 500204    | RGD1562515   | similar to RIKEN cDNA 4931417E11                                                                  | 1.86E-01 | NS | 3.63E-01 | NS | 2.01E-02 | -1.6 |
| A_64_P042674  | XM_001068316 | 295695    | Znf804a      | zinc finger protein 804A                                                                          | 4.13E-01 | NS | 1.01E-01 | NS | 3.01E-02 | -1.6 |
| A_44_P1006090 | NM_001106433 | 295053    | Spg20        | spastic paraplegia 20 (Troyer syndrome) homolog (human)                                           | 6.54E-01 | NS | 1.64E-01 | NS | 1.35E-02 | -1.6 |
| A_44_P823711  | XM_001063353 | 685326    | LOC685326    | hypothetical protein LOC685326                                                                    | 5.63E-02 | NS | 5.56E-01 | NS | 2.56E-02 | -1.6 |
| A_44_P1039417 | NM_001105909 | 288482    | Usp42        | ubiquitin specific peptidase 42                                                                   | 7.94E-01 | NS | 9.01E-01 | NS | 1.10E-02 | -1.6 |
| A_64_P026003  | NM_001047921 | 100189555 | Sec61gl      | SEC61 gamma subunit-like                                                                          | 7.36E-02 | NS | 3.82E-01 | NS | 1.70E-02 | -1.6 |
| A_64_P097078  | NM_145091    | 246311    | Pdp2         | pyruvate dehydrogenase phosphatase catalytic subunit 2                                            | 4.70E-01 | NS | 9.51E-01 | NS | 4.81E-02 | -1.6 |
| A_64_P023120  | XM_001058892 |           |              |                                                                                                   | 6.47E-02 | NS | 7.73E-01 | NS | 2.01E-02 | -1.6 |
| A_64_P104301  | XM_002728371 | 100359750 | LOC100359750 | hypothetical protein LOC100359750                                                                 | 1.37E-01 | NS | 6.67E-01 | NS | 1.15E-02 | -1.6 |
| A_64_P124274  | NM_001000260 | 293809    | Olr376       | olfactory receptor 376                                                                            | 8.24E-01 | NS | 2.16E-01 | NS | 1.80E-02 | -1.6 |
| A_42_P652357  | NM_021868    | 60465     | Cttn         | cortactin                                                                                         | 9.56E-02 | NS | 5.92E-01 | NS | 1.46E-02 | -1.6 |
| A_44_P135106  | NM_001001351 | 287516    | Olr1517      | olfactory receptor 1517                                                                           | 6.89E-01 | NS | 6.84E-01 | NS | 4.22E-02 | -1.6 |
| A_43_P12697   | NM_031827    | 83730     | Vamp8        | vesicle-associated membrane protein 8                                                             | 1.54E-01 | NS | 6.02E-02 | NS | 4.61E-02 | -1.6 |
| A_64_P049341  | XM_001070332 |           |              |                                                                                                   | 2.30E-01 | NS | 7.97E-01 | NS | 2.45E-03 | -1.6 |
| A_64_P032390  | NM_001000371 | 296022    | Olr769       | olfactory receptor 769                                                                            | 7.16E-01 | NS | 4.98E-01 | NS | 2.77E-02 | -1.6 |
| A_64_P079368  | XM_214327    | 290675    | RGD1563748   | similar to ankyrin-like protein                                                                   | 9.79E-01 | NS | 1.64E-01 | NS | 1.36E-02 | -1.6 |
| A_64_P016107  | NM_001109523 | 689093    | Upk2         | uropod 2                                                                                          | 4.97E-01 | NS | 9.83E-02 | NS | 4.51E-02 | -1.6 |
| A_64_P048854  | XM_345422    | 366170    | Tmem87a      | transmembrane protein 87A                                                                         | 9.82E-02 | NS | 5.37E-01 | NS | 1.92E-02 | -1.6 |
| A_44_P792220  | NM_001108667 | 362520    | Fktn         | fukutin                                                                                           | 1.96E-01 | NS | 4.23E-01 | NS | 4.44E-03 | -1.6 |
| A_64_P005162  | NM_012896    | 25370     | Adora3       | adenosine A3 receptor                                                                             | 5.36E-01 | NS | 5.64E-01 | NS | 4.11E-02 | -1.6 |
| A_64_P149993  | NM_001037645 | 305853    | Rab2b        | RAB2B, member RAS oncogene family                                                                 | 8.39E-02 | NS | 1.49E-01 | NS | 2.17E-03 | -1.6 |
| A_43_P12390   | NM_023994    | 78980     | Tas2r118     | taste receptor, type 2, member 118                                                                | 2.17E-01 | NS | 6.20E-01 | NS | 4.11E-02 | -1.6 |

|              |              |           |              |                                                                                                                                                                   |          |    |          |    |          |      |
|--------------|--------------|-----------|--------------|-------------------------------------------------------------------------------------------------------------------------------------------------------------------|----------|----|----------|----|----------|------|
| A_44_P540660 | NM_182736    | 288022    | Ccdc50       | coiled-coil domain containing 50                                                                                                                                  | 7.34E-01 | NS | 8.09E-01 | NS | 3.57E-02 | -1.6 |
| A_44_P320073 | NM_031242    | 81925     | Cds1         | CDP-diacylglycerol synthase 1 triggering receptor expressed on myeloid cells-like 1                                                                               | 2.95E-01 | NS | 4.33E-01 | NS | 4.51E-02 | -1.6 |
| A_44_P837382 | XM_576511    | 501096    | Trem1        |                                                                                                                                                                   | 7.75E-01 | NS | 8.13E-02 | NS | 2.51E-02 | -1.6 |
| A_64_P163322 | AABR03066381 |           |              |                                                                                                                                                                   | 8.51E-01 | NS | 9.53E-02 | NS | 1.65E-02 | -1.6 |
| A_64_P078987 | NM_001099491 | 690716    | Vom2r17      | vomer nasal 2 receptor, 17                                                                                                                                        | 5.48E-01 | NS | 1.16E-01 | NS | 3.70E-02 | -1.6 |
| A_64_P037303 | NM_001127530 | 302022    | LOC302022    | similar to nidogen 2 protein                                                                                                                                      | 7.04E-02 | NS | 4.91E-01 | NS | 1.61E-02 | -1.6 |
| A_64_P009415 | NM_001134553 | 312248    | Ubn2         | ubiquitin 2                                                                                                                                                       | 3.51E-01 | NS | 9.82E-01 | NS | 2.55E-03 | -1.6 |
| A_64_P042380 | NM_057190    | 117536    | Nelf         | nasal embryonic LHRH factor uracil phosphoribosyltransferase (FUR1)                                                                                               | 1.39E-01 | NS | 2.58E-01 | NS | 9.45E-03 | -1.6 |
| A_64_P136284 | XM_001053733 | 317237    | Uprt         | homolog (S. cerevisiae)                                                                                                                                           | 8.66E-02 | NS | 3.25E-01 | NS | 2.09E-02 | -1.6 |
| A_44_P170652 | NM_031118    | 81782     | Soat1        | sterol O-acyltransferase 1                                                                                                                                        | 2.20E-01 | NS | 4.20E-01 | NS | 1.27E-02 | -1.6 |
| A_64_P147358 | NM_001105764 | 287094    | Znf213       | zinc finger protein 213                                                                                                                                           | 1.54E-01 | NS | 6.10E-01 | NS | 1.23E-02 | -1.6 |
| A_64_P036435 | NM_183055    | 360229    | Cox8c        | cytochrome c oxidase, subunit VIIIc                                                                                                                               | 2.73E-01 | NS | 1.67E-01 | NS | 1.67E-02 | -1.6 |
| A_44_P340256 | XM_001069359 | 302425    | Awat2        | acyl-CoA wax alcohol acyltransferase 2                                                                                                                            | 6.98E-01 | NS | 5.40E-02 | NS | 4.86E-02 | -1.6 |
| A_64_P119438 | XM_001077034 | 691157    | Pramef12     | PRAME family member 12                                                                                                                                            | 2.92E-01 | NS | 7.04E-01 | NS | 2.45E-02 | -1.6 |
| A_64_P017505 | NM_001134615 | 499587    | Slc7a14      | solute carrier family 7 (cationic amino acid transporter, y+ system), member 14                                                                                   | 1.07E-01 | NS | 2.38E-01 | NS | 2.14E-02 | -1.6 |
| A_64_P031581 | NM_001105937 | 288743    | Sgsm1        | small G protein signaling modulator 1                                                                                                                             | 1.88E-01 | NS | 7.94E-01 | NS | 4.70E-02 | -1.6 |
| A_42_P674598 | NM_013067    | 25596     | Rpn1         | ribophorin I                                                                                                                                                      | 5.26E-02 | NS | 8.89E-02 | NS | 4.32E-02 | -1.6 |
| A_64_P292583 | XM_001058402 |           |              |                                                                                                                                                                   | 7.36E-01 | NS | 8.41E-01 | NS | 2.26E-02 | -1.6 |
| A_64_P074340 | NM_002726502 | 100363421 | LOC100363421 | hypothetical protein LOC100363421                                                                                                                                 | 1.09E-01 | NS | 9.29E-01 | NS | 1.38E-02 | -1.6 |
| A_44_P699797 | NM_001106166 | 291824    | Tk2          | thymidine kinase 2, mitochondrial                                                                                                                                 | 1.05E-01 | NS | 9.01E-02 | NS | 4.45E-02 | -1.6 |
| A_42_P574859 | NM_053469    | 84604     | Hamp         | hepcidin antimicrobial peptide                                                                                                                                    | 3.43E-01 | NS | 7.09E-01 | NS | 2.51E-02 | -1.6 |
| A_64_P012252 | XM_002725357 | 681776    | LOC681776    | similar to High mobility group protein 1 (HMG-1) (High mobility group protein B1) (Amphoterin) (Heparin-binding protein p30) family with sequence similarity 183, | 1.64E-01 | NS | 8.41E-01 | NS | 4.38E-02 | -1.6 |
| A_42_P521242 | XM_213312    | 287346    | Fam183b      | member B                                                                                                                                                          | 3.53E-01 | NS | 9.63E-01 | NS | 4.87E-02 | -1.6 |
| A_42_P553706 | NM_001009533 | 494320    | Ccdc8        | coiled-coil domain containing 8                                                                                                                                   | 5.59E-01 | NS | 9.08E-01 | NS | 4.96E-02 | -1.6 |
| A_64_P147748 | NM_001109378 | 679805    | LOC679805    | hypothetical protein LOC679805 leucine rich transmembrane and O-                                                                                                  | 3.66E-01 | NS | 1.10E-01 | NS | 3.99E-02 | -1.6 |
| A_43_P22401  | NM_001106284 | 293156    | Lrtomt       | methyltransferase domain containing                                                                                                                               | 2.58E-01 | NS | 7.74E-01 | NS | 8.32E-03 | -1.6 |
| A_42_P753215 | NM_032071    | 84018     | Synj2        | synaptojanin 2                                                                                                                                                    | 6.05E-01 | NS | 9.21E-01 | NS | 1.06E-02 | -1.6 |
| A_44_P299349 | NM_212544    | 361788    | Prr3         | proline rich 3                                                                                                                                                    | 5.59E-02 | NS | 1.50E-01 | NS | 2.66E-02 | -1.6 |
| A_64_P131922 | XM_002726041 |           |              |                                                                                                                                                                   | 7.13E-02 | NS | 7.94E-01 | NS | 3.51E-02 | -1.6 |
| A_64_P085530 | NM_139192    | 246074    | Scd1         | stearoyl-Coenzyme A desaturase 1                                                                                                                                  | 3.46E-01 | NS | 7.61E-01 | NS | 2.38E-02 | -1.6 |
| A_64_P073555 | NM_001047086 | 290749    | Irf2         | interferon regulatory factor 2 family with sequence similarity 126, member B                                                                                      | 6.24E-01 | NS | 9.62E-01 | NS | 3.09E-02 | -1.6 |
| A_64_P127986 | NM_001025710 | 316415    | Fam126b      |                                                                                                                                                                   | 1.29E-01 | NS | 3.93E-01 | NS | 2.76E-02 | -1.6 |
| A_64_P109844 | AF315467     |           |              |                                                                                                                                                                   | 6.32E-02 | NS | 1.78E-01 | NS | 1.55E-02 | -1.6 |
| A_43_P10634  | NM_001025123 | 315664    | Kdelc2       | KDEL (Lys-Asp-Glu-Leu) containing 2 SH3 domain binding glutamic acid-rich protein like                                                                            | 8.52E-01 | NS | 8.63E-01 | NS | 3.12E-02 | -1.6 |
| A_64_P152850 | NM_001173339 | 302363    | Sh3bgrl      |                                                                                                                                                                   | 1.06E-01 | NS | 8.94E-01 | NS | 5.25E-03 | -1.6 |
| A_64_P106216 | NM_001008950 | 494295    | Vom1r95      | vomer nasal 1 receptor, 95                                                                                                                                        | 3.53E-01 | NS | 6.52E-02 | NS | 2.20E-02 | -1.6 |
| A_43_P12611  | NM_031606    | 50557     | Pten         | phosphatase and tensin homolog                                                                                                                                    | 1.20E-01 | NS | 7.42E-01 | NS | 1.23E-02 | -1.6 |
| A_64_P144178 | XR_007629    | 299208    | RGD1563583   | similar to mKIAA0998 protein                                                                                                                                      | 1.34E-01 | NS | 7.42E-01 | NS | 2.64E-02 | -1.6 |
| A_64_P061131 | NM_001163063 | 690419    | Zfp709I1     | zinc finger protein 709-like 1                                                                                                                                    | 6.80E-02 | NS | 7.41E-02 | NS | 1.32E-02 | -1.6 |
| A_42_P521086 | NM_001100857 | 360894    | RGD1310587   | similar to hypothetical protein FLJ14146                                                                                                                          | 1.83E-01 | NS | 1.45E-01 | NS | 2.11E-02 | -1.6 |
| A_64_P057513 | XM_002727147 |           |              |                                                                                                                                                                   | 4.18E-01 | NS | 8.78E-01 | NS | 1.65E-02 | -1.6 |
| A_64_P041763 | NM_001100645 | 266808    | Lrrcc1       | leucine rich repeat and coiled-coil domain containing 1 sortilin-related VPS10 domain containing                                                                  | 7.86E-02 | NS | 3.93E-01 | NS | 3.03E-02 | -1.6 |
| A_64_P043941 | XM_002725790 | 309533    | Sorcs1       | receptor 1                                                                                                                                                        | 7.42E-01 | NS | 3.20E-01 | NS | 8.32E-03 | -1.6 |
| A_64_P048187 | NM_001013048 | 289560    | Igfbp7       | insulin-like growth factor binding protein 7 matrix metalloproteinase 14 (membrane-inserted)                                                                      | 9.72E-01 | NS | 8.91E-01 | NS | 3.25E-02 | -1.6 |
| A_42_P639027 | NM_031056    | 81707     | Mmp14        |                                                                                                                                                                   | 2.00E-01 | NS | 4.57E-01 | NS | 1.20E-02 | -1.6 |
| A_64_P080154 | NM_001037354 | 313994    | Klf11        | Kruppel-like factor 11                                                                                                                                            | 6.17E-02 | NS | 1.30E-01 | NS | 3.41E-02 | -1.6 |

|               |              |           |              |                                                                                                                      |          |    |          |    |          |      |
|---------------|--------------|-----------|--------------|----------------------------------------------------------------------------------------------------------------------|----------|----|----------|----|----------|------|
| A_64_P162860  | XM_001076499 | 686961    | LOC686961    | similar to Discs large homolog 5 (Placenta and prostate DLG) (Discs large protein P-dlg)                             | 1.32E-01 | NS | 7.11E-01 | NS | 3.03E-02 | -1.5 |
| A_64_P021028  | NM_133559    | 171085    | Pcsk4        | proprotein convertase subtilisin/kexin type 4                                                                        | 6.17E-01 | NS | 6.46E-01 | NS | 2.80E-02 | -1.5 |
| A_64_P117428  | XM_001066911 | 688431    | LOC688431    | hypothetical protein LOC688431                                                                                       | 8.20E-01 | NS | 9.31E-02 | NS | 3.13E-02 | -1.5 |
| A_44_P260297  | XM_001055921 |           |              |                                                                                                                      | 8.96E-02 | NS | 4.57E-01 | NS | 5.09E-03 | -1.5 |
| A_44_P1059229 | NM_001107707 | 310732    | Slc22a15     | solute carrier family 22, member 15                                                                                  | 9.88E-02 | NS | 4.66E-01 | NS | 4.48E-02 | -1.5 |
| A_64_P019628  | NM_017171    | 29340     | Prkce        | protein kinase C, epsilon                                                                                            | 7.74E-02 | NS | 2.45E-01 | NS | 7.97E-03 | -1.5 |
| A_64_P063518  | NM_001013996 | 306000    | Slc25a37     | solute carrier family 25, member 37                                                                                  | 9.46E-02 | NS | 6.61E-01 | NS | 2.27E-02 | -1.5 |
| A_44_P510548  | NM_001000799 | 405084    | Olr1286      | olfactory receptor 1286                                                                                              | 3.02E-01 | NS | 4.93E-01 | NS | 1.40E-02 | -1.5 |
| A_44_P191784  | NM_031969    | 24242     | Calm1        | calmodulin 1                                                                                                         | 1.23E-01 | NS | 2.82E-01 | NS | 3.92E-02 | -1.5 |
| A_43_P15466   | NM_133584    | 171115    | Pde5a        | phosphodiesterase 5A, cGMP-specific                                                                                  | 1.07E-01 | NS | 2.63E-01 | NS | 1.71E-02 | -1.5 |
| A_44_P207979  | NM_147137    | 257643    | LOC257643    | cystatin SC                                                                                                          | 7.25E-01 | NS | 6.62E-02 | NS | 4.77E-02 | -1.5 |
| A_64_P017408  | NM_001047938 | 499219    | LOC499219    | hypothetical protein LOC499219                                                                                       | 2.79E-01 | NS | 3.70E-01 | NS | 5.00E-03 | -1.5 |
| A_64_P159063  | NM_133425    | 171010    | Ppp1r14c     | protein phosphatase 1, regulatory (inhibitor) subunit 14c                                                            | 1.87E-01 | NS | 3.06E-01 | NS | 3.84E-03 | -1.5 |
| A_44_P269808  | NM_001025281 | 311651    | Slc9a8       | solute carrier family 9 (sodium/hydrogen exchanger), member 8                                                        | 2.29E-01 | NS | 4.66E-01 | NS | 4.83E-02 | -1.5 |
| A_64_P034586  | NM_134363    | 171373    | Slc12a5      | solute carrier family 12 (potassium-chloride transporter), member 5                                                  | 5.71E-01 | NS | 1.73E-01 | NS | 3.53E-02 | -1.5 |
| A_64_P163966  | NM_001100975 | 309243    | Vps13a       | vacuolar protein sorting 13 homolog A (S. cerevisiae)                                                                | 5.32E-02 | NS | 3.48E-01 | NS | 3.04E-03 | -1.5 |
| A_44_P219926  | NM_024489    | 80338     | Zbtb10       | zinc finger and BTB domain containing 10 myeloid/lymphoid or mixed-lineage leukemia (trithorax homolog, Drosophila); | 1.11E-01 | NS | 4.83E-01 | NS | 3.28E-02 | -1.5 |
| A_44_P794669  | NM_013217    | 26955     | Mllt4        | translocated to, 4                                                                                                   | 3.22E-01 | NS | 7.95E-01 | NS | 1.49E-02 | -1.5 |
| A_64_P122178  | NM_001168642 | 690661    | Zfp40        | zinc finger protein 40                                                                                               | 1.17E-01 | NS | 4.43E-01 | NS | 2.97E-02 | -1.5 |
| A_64_P090739  | XM_002729568 | 100360849 | LOC100360849 | hypothetical protein LOC100360849                                                                                    | 7.28E-02 | NS | 6.22E-01 | NS | 2.68E-02 | -1.5 |
| A_64_P153045  | NM_013039    | 25559     | Abcc8        | ATP-binding cassette, sub-family C (CFTR/MRP), member 8                                                              | 5.13E-02 | NS | 9.76E-01 | NS | 4.67E-02 | -1.5 |
| A_44_P241324  | NM_001025676 | 307410    | Rbm22        | RNA binding motif protein 22                                                                                         | 1.56E-01 | NS | 8.28E-01 | NS | 2.40E-02 | -1.5 |
| A_64_P324819  | NM_017204    | 29457     | Map6         | microtubule-associated protein 6                                                                                     | 4.08E-01 | NS | 1.58E-01 | NS | 9.41E-03 | -1.5 |
| A_64_P042102  | XM_001072043 | 498054    | RGD1564317   | RGD1564317                                                                                                           | 3.95E-01 | NS | 6.35E-01 | NS | 7.20E-03 | -1.5 |
| A_42_P465664  | NM_001108679 | 362597    | Fam176b      | family with sequence similarity 176, member B                                                                        | 1.27E-01 | NS | 7.92E-01 | NS | 9.18E-03 | -1.5 |
| A_64_P122584  | NM_001106900 | 301343    | Lman2l       | lectin, mannose-binding 2-like                                                                                       | 6.38E-01 | NS | 2.06E-01 | NS | 5.77E-03 | -1.5 |
| A_64_P108652  | NM_001107454 | 308068    | Nkd2         | naked cuticle homolog 2 (Drosophila)                                                                                 | 2.56E-01 | NS | 2.88E-01 | NS | 3.89E-02 | -1.5 |
| A_64_P141569  | NM_001106995 | 303070    | Nipal4       | NIPA-like domain containing 4                                                                                        | 3.09E-01 | NS | 8.21E-01 | NS | 6.54E-03 | -1.5 |
| A_64_P079478  | XM_001065610 |           |              |                                                                                                                      | 1.16E-01 | NS | 8.92E-01 | NS | 1.03E-02 | -1.5 |
| A_44_P522823  |              | 681839    | LOC681839    | hypothetical protein LOC681839                                                                                       | 1.66E-01 | NS | 3.52E-01 | NS | 4.77E-02 | -1.5 |
| A_64_P124781  | XM_002725898 |           |              |                                                                                                                      | 9.89E-02 | NS | 4.59E-01 | NS | 3.48E-02 | -1.5 |
| A_64_P006123  | NM_001107675 | 310405    | Maml3        | mastermind like 3 (Drosophila)                                                                                       | 7.93E-02 | NS | 2.11E-01 | NS | 4.62E-02 | -1.5 |
| A_64_P045762  | XM_002727258 | 100366147 | LOC100366147 | hypothetical protein LOC100366147                                                                                    | 1.06E-01 | NS | 7.74E-01 | NS | 1.87E-02 | -1.5 |
| A_64_P046229  | XM_001077379 | 307845    | Mtss1l       | metastasis suppressor 1-like                                                                                         | 2.74E-01 | NS | 6.46E-02 | NS | 3.96E-03 | -1.5 |
| A_64_P047537  | XM_213600    | 288028    | Tmem44       | transmembrane protein 44                                                                                             | 1.89E-01 | NS | 4.85E-01 | NS | 3.64E-02 | -1.5 |
| A_43_P10724   | NM_001106492 | 295961    | Apip         | APAF1 interacting protein                                                                                            | 1.25E-01 | NS | 4.44E-01 | NS | 1.34E-02 | -1.5 |
| A_64_P088201  | XM_001054973 | 363089    | Fam63b       | family with sequence similarity 63, member B                                                                         | 3.15E-01 | NS | 9.39E-01 | NS | 1.26E-03 | -1.5 |
| A_64_P085605  | XM_001053122 |           |              |                                                                                                                      | 3.88E-01 | NS | 3.35E-01 | NS | 1.57E-02 | -1.5 |
| A_64_P154952  | NM_019328    | 54278     | Nr4a2        | nuclear receptor subfamily 4, group A, member 2                                                                      | 2.64E-01 | NS | 5.92E-01 | NS | 2.95E-02 | -1.5 |
| A_42_P553444  | L14933       |           |              |                                                                                                                      | 2.43E-01 | NS | 7.66E-02 | NS | 2.46E-02 | -1.5 |
| A_44_P779296  | NM_001025060 | 502684    | LOC502684    | hypothetical protein LOC502684                                                                                       | 1.19E-01 | NS | 2.29E-01 | NS | 3.70E-02 | -1.5 |
| A_64_P046577  | NM_001108939 | 365744    | Hnf4g        | hepatocyte nuclear factor 4, gamma                                                                                   | 4.78E-01 | NS | 1.08E-01 | NS | 4.85E-02 | -1.5 |
| A_64_P156690  | NM_001037153 | 252897    | Pcdhga11     | protocadherin gamma subfamily A, 11                                                                                  | 2.70E-01 | NS | 2.40E-01 | NS | 1.61E-02 | -1.5 |
| A_44_P127467  | NM_019204    | 29392     | Bace1        | beta-site APP cleaving enzyme 1                                                                                      | 2.42E-01 | NS | 1.87E-01 | NS | 3.80E-02 | -1.5 |
| A_64_P162760  | XM_002727586 |           |              |                                                                                                                      | 5.37E-01 | NS | 9.05E-01 | NS | 1.07E-02 | -1.5 |
| A_44_P238906  | XM_345356    |           |              |                                                                                                                      | 9.00E-02 | NS | 3.42E-01 | NS | 1.52E-02 | -1.5 |

|               |              |        |            |                                                                                                                          |          |    |          |    |          |      |
|---------------|--------------|--------|------------|--------------------------------------------------------------------------------------------------------------------------|----------|----|----------|----|----------|------|
| A_44_P988767  | NM_001110860 | 25620  | Crem       | cAMP responsive element modulator                                                                                        | 8.58E-02 | NS | 6.18E-01 | NS | 3.90E-03 | -1.5 |
| A_64_P107042  | NM_001000500 | 304990 | Olr1595    | olfactory receptor 1595                                                                                                  | 6.10E-01 | NS | 1.66E-01 | NS | 4.58E-02 | -1.5 |
| A_64_P135235  | XM_001076895 |        |            |                                                                                                                          | 1.23E-01 | NS | 6.97E-01 | NS | 2.15E-02 | -1.5 |
| A_43_P14264   | NM_053653    | 114111 | Vegfc      | vascular endothelial growth factor C                                                                                     | 1.04E-01 | NS | 4.18E-01 | NS | 8.04E-03 | -1.5 |
| A_64_P155618  | XM_001063873 | 685569 | LOC685569  | hypothetical protein LOC685569                                                                                           | 4.12E-01 | NS | 2.60E-01 | NS | 3.33E-02 | -1.5 |
| A_64_P033698  | NM_001106992 | 303010 | Cpeb4      | cytoplasmic polyadenylation element binding protein 4                                                                    | 1.59E-01 | NS | 8.15E-01 | NS | 2.53E-02 | -1.5 |
| A_64_P080856  | NM_001035517 | 361654 | RGD1310127 | similar to cDNA sequence BC017158                                                                                        | 8.45E-02 | NS | 9.00E-01 | NS | 2.85E-02 | -1.5 |
| A_43_P11538   | NM_012734    | 25058  | Hk1        | hexokinase 1                                                                                                             | 7.25E-02 | NS | 2.39E-01 | NS | 3.43E-02 | -1.5 |
| A_43_P19178   | NM_031574    | 29372  | Rasa3      | RAS p21 protein activator 3                                                                                              | 4.16E-01 | NS | 6.48E-01 | NS | 1.44E-02 | -1.5 |
| A_64_P137502  | NM_001037135 | 498849 | Pcdhga10   | protocadherin gamma subfamily A, 10                                                                                      | 7.16E-01 | NS | 4.05E-01 | NS | 5.00E-03 | -1.5 |
| A_64_P011197  | XM_001065654 | 685890 | LOC685890  | hypothetical protein LOC685890                                                                                           | 1.82E-01 | NS | 6.55E-01 | NS | 3.46E-02 | -1.5 |
| A_64_P304652  | XR_007733    |        |            |                                                                                                                          | 9.01E-02 | NS | 8.26E-01 | NS | 4.28E-02 | -1.5 |
| A_64_P031046  | XM_002726652 |        |            |                                                                                                                          | 2.83E-01 | NS | 8.84E-01 | NS | 4.79E-02 | -1.5 |
| A_64_P004023  | NM_001105815 | 287541 | lft20      | intraflagellar transport 20 homolog (Chlamydomonas)                                                                      | 1.20E-01 | NS | 1.27E-01 | NS | 3.99E-02 | -1.5 |
| A_44_P437956  | NM_031123    | 81801  | Stc1       | stanniocalcin 1                                                                                                          | 3.18E-01 | NS | 4.26E-01 | NS | 4.42E-02 | -1.5 |
| A_44_P529524  | NM_001100639 | 171068 | Pou2f1     | POU domain, class 2, transcription factor 1                                                                              | 5.85E-01 | NS | 9.91E-01 | NS | 1.05E-02 | -1.5 |
| A_44_P318259  | NM_138916    | 192350 | Crkrs      | Cdc2-related kinase, arginine/serine-rich pleckstrin homology domain containing, family A member 7                       | 3.03E-01 | NS | 9.59E-01 | NS | 3.54E-02 | -1.5 |
| A_44_P475663  | NM_001144861 | 499249 | Plekha7    | family A member 7                                                                                                        | 2.43E-01 | NS | 7.19E-01 | NS | 4.33E-02 | -1.5 |
| A_64_P044470  | NM_001108665 | 362517 | Mrp150     | mitochondrial ribosomal protein L50                                                                                      | 2.52E-01 | NS | 5.17E-01 | NS | 2.19E-02 | -1.5 |
| A_64_P161433  | XM_001056520 | 680835 | LOC680835  | similar to cullin 7                                                                                                      | 1.77E-01 | NS | 3.26E-01 | NS | 4.78E-03 | -1.5 |
| A_64_P073183  | XM_001061392 | 315840 | Myo6       | myosin VI                                                                                                                | 1.84E-01 | NS | 9.15E-01 | NS | 3.72E-02 | -1.5 |
| A_44_P1021381 | NM_031811    | 83688  | Taldo1     | transaldolase 1                                                                                                          | 9.64E-01 | NS | 2.82E-01 | NS | 1.48E-02 | -1.5 |
| A_64_P073243  | NM_001107828 | 311857 | Gpr107     | G protein-coupled receptor 107                                                                                           | 1.49E-01 | NS | 6.60E-01 | NS | 9.48E-03 | -1.5 |
| A_64_P132571  | NM_001107703 | 310704 | Bcl9       | B-cell CLL/lymphoma 9                                                                                                    | 3.44E-01 | NS | 3.91E-01 | NS | 3.93E-02 | -1.5 |
| A_64_P297908  | BC061963     | 296824 | MGC72627   | similar to RIKEN cDNA A330021E22                                                                                         | 2.43E-01 | NS | 2.51E-01 | NS | 1.10E-02 | -1.5 |
| A_44_P762198  | NM_001106386 | 294375 | Reep3      | receptor accessory protein 3                                                                                             | 5.60E-01 | NS | 6.52E-01 | NS | 7.22E-03 | -1.5 |
| A_64_P056122  | XR_007312    |        |            |                                                                                                                          | 1.66E-01 | NS | 2.41E-01 | NS | 1.99E-02 | -1.5 |
| A_44_P128248  | NM_001008831 | 309621 | RT1-Ba     | RT1 class II, locus Ba                                                                                                   | 3.04E-01 | NS | 6.57E-02 | NS | 4.09E-02 | -1.5 |
| A_64_P054261  | XM_001074743 |        |            |                                                                                                                          | 1.47E-01 | NS | 6.11E-01 | NS | 1.95E-02 | -1.5 |
| A_64_P054576  | NM_001017508 | 498664 | LOC498664  | similar to hypothetical protein MGC35169 potassium inwardly-rectifying channel, subfamily J, member 13                   | 7.34E-01 | NS | 8.17E-02 | NS | 3.33E-02 | -1.5 |
| A_44_P449938  | NM_053608    | 94341  | Kcnj13     | subfamily J, member 13                                                                                                   | 7.36E-01 | NS | 1.49E-01 | NS | 1.86E-02 | -1.5 |
| A_42_P731510  | NM_001105807 | 287521 | Mnt        | max binding protein                                                                                                      | 4.17E-01 | NS | 6.28E-01 | NS | 1.46E-02 | -1.5 |
| A_44_P189378  | NM_001000094 | 290008 | Olr1610    | olfactory receptor 1610                                                                                                  | 8.12E-01 | NS | 6.51E-02 | NS | 4.84E-02 | -1.5 |
| A_43_P12695   | NM_031822    | 83724  | Ncoa2      | nuclear receptor coactivator 2                                                                                           | 2.21E-01 | NS | 7.04E-01 | NS | 3.40E-02 | -1.5 |
| A_64_P021676  | NM_012736    | 25062  | Gpd2       | glycerol-3-phosphate dehydrogenase 2, mitochondrial                                                                      | 8.11E-02 | NS | 6.71E-01 | NS | 3.59E-02 | -1.5 |
| A_64_P049411  | XM_001055142 | 679229 | LOC679229  | similar to zinc finger protein 397                                                                                       | 1.75E-01 | NS | 4.26E-01 | NS | 3.52E-03 | -1.5 |
| A_64_P129253  | XM_001076970 |        |            |                                                                                                                          | 3.40E-01 | NS | 1.19E-01 | NS | 2.86E-02 | -1.5 |
| A_64_P098931  | NM_001134956 | 362617 | Ahdc1      | AT hook, DNA binding motif, containing 1 solute carrier family 39 (zinc transporter), member 9                           | 1.75E-01 | NS | 9.69E-01 | NS | 5.68E-03 | -1.5 |
| A_64_P145761  | NM_001034929 | 314275 | Slc39a9    | AT hook, DNA binding motif, containing 1 solute carrier family 39 (zinc transporter), member 9                           | 2.88E-01 | NS | 4.39E-01 | NS | 3.02E-03 | -1.5 |
| A_43_P11720   | NM_013112    | 25649  | Apoa2      | apolipoprotein A-II                                                                                                      | 7.55E-01 | NS | 4.89E-01 | NS | 3.06E-02 | -1.5 |
| A_44_P339867  | NM_017199    | 29435  | Ssr4       | signal sequence receptor, delta                                                                                          | 6.68E-02 | NS | 6.31E-01 | NS | 4.22E-02 | -1.5 |
| A_64_P014687  | NM_012650    | 24775  | Shbg       | sex hormone binding globulin                                                                                             | 1.05E-01 | NS | 1.99E-01 | NS | 1.50E-02 | -1.5 |
| A_64_P018317  | NM_013023    | 25539  | Sag        | S-antigen; retina and pineal gland (arrestin)                                                                            | 6.45E-01 | NS | 1.79E-01 | NS | 1.26E-02 | -1.5 |
| A_64_P133177  | NM_001170462 | 293042 | Sema4b     | sema domain, immunoglobulin domain (Ig), transmembrane domain (TM) and short cytoplasmic domain, (semaphorin) 4B         | 5.07E-02 | NS | 9.35E-01 | NS | 1.90E-02 | -1.5 |
| A_43_P16031   | XM_001053505 |        |            |                                                                                                                          | 4.24E-01 | NS | 6.24E-01 | NS | 4.81E-02 | -1.5 |
| A_64_P071091  | XM_001056413 | 680273 | LOC680273  | similar to Forkhead box protein L1 (Forkhead-related protein FKHL11) (Forkhead-related transcription factor 7) (FREAC-7) | 8.21E-01 | NS | 4.37E-01 | NS | 4.56E-02 | -1.5 |
| A_43_P19599   | NM_001079938 | 303970 | Bbx        | bobby sox homolog (Drosophila)                                                                                           | 5.83E-01 | NS | 3.18E-01 | NS | 6.62E-03 | -1.5 |

|               |              |           |              |                                                                                                |          |    |          |    |          |      |
|---------------|--------------|-----------|--------------|------------------------------------------------------------------------------------------------|----------|----|----------|----|----------|------|
| A_64_P062495  | NM_134336    | 171297    | Nlgn3        | neuroligin 3                                                                                   | 1.56E-01 | NS | 2.10E-01 | NS | 2.44E-02 | -1.5 |
| A_64_P151368  | NM_001109602 | 690585    | Thoc4        | THO complex 4                                                                                  | 1.21E-01 | NS | 3.95E-01 | NS | 3.71E-02 | -1.5 |
| A_43_P19889   | NM_001106702 | 298698    | Angptl6      | angiopoietin-like 6                                                                            | 3.07E-01 | NS | 2.25E-01 | NS | 1.65E-02 | -1.5 |
| A_44_P297737  | NM_001135877 | 363493    | Taf7l        | TAF7-like RNA polymerase II, TATA box binding protein (TBP)-associated factor                  | 4.50E-01 | NS | 1.06E-01 | NS | 4.40E-02 | -1.5 |
| A_64_P144411  | NM_130742    | 170501    | Galnt10      | UDP-N-acetyl-alpha-D-galactosamine:polypeptide N-acetylglucosaminyltransferase 10 (GalNAc-T10) | 1.21E-01 | NS | 9.15E-01 | NS | 2.13E-02 | -1.5 |
| A_64_P022322  | NM_001106032 | 290206    | Psmb11       | proteasome (prosome, macropain) subunit, beta type, 11                                         | 1.54E-01 | NS | 9.66E-01 | NS | 4.32E-02 | -1.5 |
| A_44_P322987  | NM_012936    | 25421     | Crybb1       | crystallin, beta B1                                                                            | 4.76E-01 | NS | 2.59E-01 | NS | 2.31E-02 | -1.5 |
| A_64_P031840  | NM_001017445 | 291000    | Faf2         | Fas associated factor family member 2                                                          | 6.62E-02 | NS | 1.33E-01 | NS | 2.62E-02 | -1.5 |
| A_64_P139000  | NM_001014236 | 364534    | Ssbp4        | single stranded DNA binding protein 4                                                          | 1.27E-01 | NS | 6.96E-01 | NS | 2.34E-02 | -1.5 |
| A_44_P391345  | NM_024372    | 79213     | Slc6a11      | solute carrier family 6 (neurotransmitter transporter, GABA), member 11                        | 3.16E-01 | NS | 3.85E-01 | NS | 1.96E-02 | -1.5 |
| A_42_P626851  | NM_001107917 | 313087    | Cpne3        | copine III                                                                                     | 8.06E-02 | NS | 4.38E-01 | NS | 9.66E-03 | -1.5 |
| A_64_P040234  | XR_007195    | 83830     | Gtf2a1       | general transcription factor IIA, 1                                                            | 2.60E-01 | NS | 8.44E-01 | NS | 2.11E-02 | -1.5 |
| A_43_P12161   | NM_022208    | 311861    | Fibcd1       | fibrinogen C domain containing 1                                                               | 7.56E-01 | NS | 5.87E-01 | NS | 7.03E-03 | -1.5 |
| A_64_P110394  | NM_001107829 | 311861    | Fibcd1       | peptidylglycine alpha-amidating monooxygenase                                                  | 6.72E-01 | NS | 2.81E-01 | NS | 1.84E-02 | -1.5 |
| A_64_P058452  | NM_013000    | 25508     | Pam          | tectorin alpha                                                                                 | 5.09E-02 | NS | 9.16E-01 | NS | 2.23E-02 | -1.5 |
| A_64_P012972  | NM_001106814 | 300653    | Tecta        | uromodulin                                                                                     | 1.09E-01 | NS | 9.99E-01 | NS | 2.72E-03 | -1.5 |
| A_64_P022545  | NM_017082    | 25128     | Umod         | RGD1566311                                                                                     | 2.01E-01 | NS | 8.79E-01 | NS | 1.34E-02 | -1.5 |
| A_64_P143216  | XM_580142    | 500963    | RGD1566311   | RGD1566311                                                                                     | 3.86E-01 | NS | 2.72E-01 | NS | 4.14E-02 | -1.5 |
| A_64_P053842  | XM_001071576 | 315959    | Msl2         | male-specific lethal 2 homolog (Drosophila)                                                    | 1.87E-01 | NS | 3.24E-01 | NS | 3.70E-03 | -1.5 |
| A_64_P050364  | XM_002726150 | 100365115 | LOC100365115 | LY6/PLAUR domain containing 6B-like                                                            | 2.39E-01 | NS | 8.06E-01 | NS | 4.31E-02 | -1.5 |
| A_64_P067796  | NM_001000635 | 404828    | Olr660       | olfactory receptor 660                                                                         | 6.76E-01 | NS | 1.22E-01 | NS | 4.41E-02 | -1.5 |
| A_43_P10843   | NM_001108561 | 362013    | Ahcy1        | adenosylhomocysteinase-like 1                                                                  | 7.10E-01 | NS | 9.24E-01 | NS | 7.53E-03 | -1.5 |
| A_64_P149829  | XM_001054528 | 679802    | Fam154a      | family with sequence similarity 154, member A                                                  | 7.80E-01 | NS | 9.30E-02 | NS | 4.08E-02 | -1.5 |
| A_64_P065086  | XM_001055985 | 680168    | LOC680168    | similar to retinoblastoma-associated protein 140                                               | 1.50E-01 | NS | 7.15E-01 | NS | 2.40E-02 | -1.5 |
| A_64_P176165  | NM_001168586 | 690777    | Rufy2        | RUN and FYVE domain-containing 2                                                               | 1.26E-01 | NS | 3.19E-01 | NS | 7.60E-03 | -1.5 |
| A_64_P069641  | NM_031087    | 81751     | Psen2        | presenilin 2                                                                                   | 5.75E-01 | NS | 9.96E-01 | NS | 6.46E-03 | -1.5 |
| A_64_P029882  | XM_002725149 |           |              |                                                                                                | 5.02E-01 | NS | 3.34E-01 | NS | 1.39E-02 | -1.5 |
| A_44_P522355  | NM_078620    | 140448    | Slc8a3       | solute carrier family 8 (sodium/calcium exchanger), member 3                                   | 6.00E-02 | NS | 5.32E-01 | NS | 4.00E-02 | -1.5 |
| A_64_P001389  | NM_001109465 | 685325    | Ddo          | D-aspartate oxidase                                                                            | 5.59E-01 | NS | 4.45E-01 | NS | 2.67E-02 | -1.5 |
| A_64_P156298  | NM_001000823 | 405112    | Olr427       | olfactory receptor 427                                                                         | 6.52E-01 | NS | 1.63E-01 | NS | 4.95E-02 | -1.5 |
| A_64_P113184  | NM_001106281 | 293118    | Prp          | prolylcarboxypeptidase (angiotensinase C)                                                      | 1.19E-01 | NS | 8.12E-01 | NS | 2.34E-02 | -1.5 |
| A_44_P1007008 | NM_001024755 | 295704    | Ube2l6       | ubiquitin-conjugating enzyme E2L 6                                                             | 1.23E-01 | NS | 6.25E-01 | NS | 1.77E-02 | -1.5 |
| A_64_P154292  | NM_001111294 | 362152    | Hnmpa3       | heterogeneous nuclear ribonucleoprotein A3                                                     | 9.18E-02 | NS | 2.43E-01 | NS | 4.29E-02 | -1.5 |
| A_64_P148102  | XM_576547    | 501128    | RGD1565676   | similar to regulatory factor X domain containing 1                                             | 7.84E-02 | NS | 3.93E-01 | NS | 4.82E-02 | -1.5 |
| A_44_P1007933 | NM_001044294 | 689161    | Gabarapl1    | GABA(A) receptor-associated protein like 1                                                     | 3.37E-01 | NS | 2.47E-01 | NS | 1.56E-02 | -1.5 |
| A_64_P012651  | NM_001004224 | 293852    | Bcap31       | B-cell receptor-associated protein 31                                                          | 8.81E-02 | NS | 2.66E-01 | NS | 9.70E-03 | -1.5 |
| A_64_P115512  | XM_001057018 | 297099    | Hoxa9l       | homeobox A9-like                                                                               | 4.36E-01 | NS | 8.79E-01 | NS | 3.71E-02 | -1.5 |
| A_43_P12678   | NM_031784    | 83614     | Pias3        | protein inhibitor of activated STAT, 3                                                         | 1.34E-01 | NS | 7.97E-02 | NS | 7.84E-03 | -1.5 |
| A_42_P668072  | NM_013130    | 25671     | Smad1        | SMAD family member 1                                                                           | 2.78E-01 | NS | 5.83E-01 | NS | 5.97E-03 | -1.5 |
| A_64_P163658  | NM_001017513 | 499108    | Sertad3      | SERTA domain containing 3                                                                      | 1.98E-01 | NS | 3.84E-01 | NS | 1.55E-02 | -1.5 |
| A_64_P161779  | XM_001062632 | 684934    | LOC684934    | similar to coiled-coil domain containing 9                                                     | 8.78E-01 | NS | 8.85E-01 | NS | 3.35E-02 | -1.5 |
| A_44_P1053951 | BF521738     |           |              |                                                                                                | 1.30E-01 | NS | 4.23E-01 | NS | 4.47E-02 | -1.5 |
| A_64_P152047  | NM_001000521 | 361033    | Olr1619      | olfactory receptor 1619                                                                        | 6.81E-01 | NS | 1.05E-01 | NS | 2.98E-02 | -1.5 |
| A_44_P768777  | NM_001135094 | 312203    | Klf14        | Kruppel-like factor 14                                                                         | 2.87E-01 | NS | 2.01E-01 | NS | 4.28E-02 | -1.5 |
| A_44_P805210  | NM_001012217 | 365396    | Ssh3         | slingshot homolog 3 (Drosophila)                                                               | 1.26E-01 | NS | 2.64E-01 | NS | 4.43E-02 | -1.5 |

|               |              |           |              |                                                                                       |          |    |          |    |          |      |
|---------------|--------------|-----------|--------------|---------------------------------------------------------------------------------------|----------|----|----------|----|----------|------|
| A_43_P17057   | NM_001013925 | 296731    | Nub1         | negative regulator of ubiquitin-like proteins 1                                       | 1.19E-01 | NS | 6.77E-01 | NS | 1.04E-02 | -1.5 |
| A_64_P043796  | NM_001012471 | 315936    | Zbtb38       | zinc finger and BTB domain containing 38                                              | 4.91E-01 | NS | 6.58E-01 | NS | 1.67E-02 | -1.5 |
| A_64_P030937  | NM_001047864 | 297576    | Dppa3        | developmental pluripotency-associated 3                                               | 2.02E-01 | NS | 2.29E-01 | NS | 3.71E-02 | -1.5 |
| A_42_P478171  | CFI09829     |           |              |                                                                                       | 1.43E-01 | NS | 3.59E-01 | NS | 1.32E-02 | -1.5 |
| A_64_P163619  | XM_001058786 | 686314    | LOC686314    | similar to dachshund b                                                                | 8.93E-01 | NS | 7.90E-01 | NS | 3.44E-02 | -1.5 |
| A_44_P396450  | XM_576451    |           |              |                                                                                       | 9.31E-02 | NS | 9.11E-01 | NS | 1.58E-02 | -1.5 |
| A_42_P828695  | NM_001106411 | 294744    | Gpx8         | glutathione peroxidase 8                                                              | 2.78E-01 | NS | 5.39E-02 | NS | 4.36E-02 | -1.5 |
| A_44_P299641  | XM_001072702 | 288490    | Olr1572      | olfactory receptor 1572                                                               | 3.35E-01 | NS | 7.63E-01 | NS | 7.93E-03 | -1.5 |
| A_64_P097626  | NM_001105907 | 288471    | Trrap        | transformation/transcription domain-associated protein                                | 9.29E-01 | NS | 1.57E-01 | NS | 3.46E-02 | -1.5 |
| A_64_P086565  | NM_001013434 | 365355    | Rras2        | related RAS viral (r-ras) oncogene homolog 2                                          | 1.08E-01 | NS | 2.83E-01 | NS | 1.12E-02 | -1.5 |
| A_64_P079666  | NM_173124    | 286905    | Cyp4f5       | cytochrome P450, family 4, subfamily f, polypeptide 5                                 | 3.94E-01 | NS | 1.18E-01 | NS | 5.96E-03 | -1.5 |
| A_64_P332963  | NM_001107523 | 308738    | Chd2         | chromodomain helicase DNA binding protein 2                                           | 7.13E-02 | NS | 3.81E-01 | NS | 8.58E-03 | -1.5 |
| A_64_P014402  | NM_201988    | 290648    | Pgpep1       | pyroglutamyl-peptidase I                                                              | 3.42E-01 | NS | 8.82E-01 | NS | 4.15E-03 | -1.5 |
| A_64_P304646  | XM_001065014 | 315903    | RGD1307882   | similar to CG9346-PA                                                                  | 7.12E-02 | NS | 4.94E-01 | NS | 3.15E-03 | -1.5 |
| A_44_P729931  | XM_001061367 | 682404    | LOC682404    | similar to CG12929-PA                                                                 | 8.71E-02 | NS | 4.60E-01 | NS | 1.82E-02 | -1.5 |
| A_44_P444801  | NM_001013082 | 296851    | Pon2         | paraoxonase 2                                                                         | 7.04E-02 | NS | 2.44E-01 | NS | 2.45E-02 | -1.5 |
| A_64_P124933  | NM_001109503 | 688478    | Comm2        | COMM domain containing 2                                                              | 2.65E-01 | NS | 3.43E-01 | NS | 4.32E-02 | -1.5 |
| A_42_P759843  | XR_086347    | 367311    | Arl4c        | ADP-ribosylation factor-like 4C                                                       | 1.23E-01 | NS | 2.08E-01 | NS | 1.47E-02 | -1.5 |
| A_64_P034060  | DQ177457     |           |              |                                                                                       | 1.01E-01 | NS | 6.44E-02 | NS | 1.43E-02 | -1.5 |
| A_64_P161381  | XM_576837    |           |              |                                                                                       | 2.07E-01 | NS | 6.81E-01 | NS | 1.89E-02 | -1.5 |
| A_64_P165888  | AA799423     |           |              |                                                                                       | 1.75E-01 | NS | 8.46E-01 | NS | 1.01E-02 | -1.5 |
| A_64_P156662  | AW921374     | 688832    | LOC688832    | hypothetical protein LOC688832                                                        | 4.00E-01 | NS | 4.91E-01 | NS | 1.84E-02 | -1.5 |
| A_64_P124646  | NM_022693    | 64634     | Sh3bp4       | SH3-domain binding protein 4                                                          | 2.71E-01 | NS | 6.75E-01 | NS | 1.13E-02 | -1.5 |
| A_64_P009245  | NM_001162897 | 100302372 | LOC100302372 | hypothetical protein LOC100302372                                                     | 2.77E-01 | NS | 6.20E-01 | NS | 1.95E-02 | -1.5 |
| A_44_P445903  | NM_001108776 | 363127    | Dnajc13      | DnaJ (Hsp40) homolog, subfamily C, member 13                                          | 7.84E-01 | NS | 9.18E-01 | NS | 2.09E-03 | -1.5 |
| A_64_P165005  | NM_001044251 | 364754    | Fzd8         | frizzled homolog 8 (Drosophila)                                                       | 2.76E-01 | NS | 4.69E-01 | NS | 3.91E-02 | -1.5 |
| A_64_P000121  | NM_001108380 | 361050    | Rcctb1       | regulator of chromosome condensation (RCC1) and BTB (POZ) domain containing protein 1 | 3.91E-01 | NS | 5.11E-01 | NS | 2.89E-02 | -1.5 |
| A_43_P11152   | NM_001106434 | 295061    | Tm4sf1       | transmembrane 4 L six family member 1                                                 | 2.00E-01 | NS | 2.47E-01 | NS | 4.92E-03 | -1.5 |
| A_42_P506273  | NM_021750    | 60356     | Csad         | cysteine sulfinic acid decarboxylase                                                  | 5.26E-01 | NS | 1.25E-01 | NS | 4.65E-02 | -1.5 |
| A_42_P570756  | NM_134345    | 171335    | Cox8a        | cytochrome c oxidase subunit VIIIa                                                    | 1.53E-01 | NS | 6.32E-01 | NS | 4.54E-02 | -1.5 |
| A_44_P305135  | NM_021681    | 59317     | Epb4.111     | erythrocyte protein band 4.1-like 1                                                   | 4.07E-01 | NS | 7.08E-01 | NS | 2.26E-02 | -1.5 |
| A_64_P010368  | NM_001106479 | 295586    | Clcn6        | chloride channel 6                                                                    | 1.43E-01 | NS | 5.47E-01 | NS | 4.01E-02 | -1.5 |
| A_64_P040700  | NM_001134797 | 688422    | Dydc2        | DPY30 domain containing 2                                                             | 4.37E-01 | NS | 6.16E-01 | NS | 3.99E-02 | -1.5 |
| A_44_P423613  | NM_139324    | 192204    | Ehd4         | EH-domain containing 4                                                                | 2.03E-01 | NS | 1.45E-01 | NS | 4.88E-02 | -1.5 |
| A_64_P015380  | FQ211604     |           |              |                                                                                       | 2.40E-01 | NS | 2.19E-01 | NS | 7.83E-03 | -1.5 |
| A_64_P084273  | XM_001074093 | 686437    | LOC686437    | similar to Protein C14orf105                                                          | 9.05E-01 | NS | 2.08E-01 | NS | 3.08E-02 | -1.5 |
| A_44_P196984  | NM_001108667 | 362520    | Fktn         | fukutin                                                                               | 5.55E-02 | NS | 4.33E-01 | NS | 6.95E-03 | -1.5 |
| A_64_P073650  | NM_001107271 | 305972    | Zfp395       | zinc finger protein 395                                                               | 1.98E-01 | NS | 7.43E-01 | NS | 3.30E-03 | -1.5 |
| A_64_P067883  | NM_001109585 | 690374    | Trim47       | tripartite motif-containing 47                                                        | 6.82E-01 | NS | 9.74E-01 | NS | 9.38E-03 | -1.5 |
| A_64_P119502  | XM_001072465 | 316457    | Pikfyve      | phosphoinositide kinase, FYVE finger containing                                       | 2.75E-01 | NS | 8.77E-01 | NS | 3.22E-02 | -1.5 |
| A_44_P1009948 | NM_001100551 | 303180    | RGD1304587   | similar to RIKEN cDNA 2310033P09                                                      | 1.33E-01 | NS | 4.57E-01 | NS | 4.36E-02 | -1.5 |
| A_64_P161123  | XM_002728662 |           |              |                                                                                       | 7.49E-01 | NS | 1.74E-01 | NS | 4.72E-02 | -1.5 |
| A_44_P156830  | NM_001107350 | 306886    | Ripk1        | receptor (TNFRSF)-interacting serine-threonine kinase 1                               | 9.60E-01 | NS | 3.94E-01 | NS | 6.57E-03 | -1.5 |
| A_64_P149855  | XR_007937    |           |              |                                                                                       | 4.39E-01 | NS | 4.76E-01 | NS | 2.22E-02 | -1.5 |
| A_44_P869091  | XM_002725461 |           |              |                                                                                       | 3.59E-01 | NS | 5.47E-01 | NS | 2.40E-02 | -1.5 |
| A_64_P077220  | NM_001107157 | 304591    | Dtx2         | deltex homolog 2 (Drosophila)                                                         | 1.88E-01 | NS | 9.05E-01 | NS | 3.73E-02 | -1.5 |
| A_64_P048126  | NM_001047953 | 499843    | LOC499843    | LRRGT00091                                                                            | 8.66E-01 | NS | 6.34E-01 | NS | 4.09E-03 | -1.5 |
| A_44_P381906  | NM_019349    | 54308     | Slk          | STE20-like kinase (yeast)                                                             | 1.97E-01 | NS | 8.28E-01 | NS | 1.37E-02 | -1.5 |
| A_43_P12942   | NM_053817    | 116508    | Nrxn3        | neurexin 3                                                                            | 7.94E-01 | NS | 7.93E-01 | NS | 4.65E-02 | -1.5 |
| A_64_P044221  | XM_002726584 | 500536    | RGD1561416   | similar to novel protein (HT036)                                                      | 7.56E-02 | NS | 6.46E-02 | NS | 3.57E-02 | -1.5 |



|               |              |        |            |                                                |          |    |          |    |          |      |
|---------------|--------------|--------|------------|------------------------------------------------|----------|----|----------|----|----------|------|
| A_64_P047998  | XM_001062787 |        |            |                                                | 3.48E-01 | NS | 9.29E-01 | NS | 2.70E-02 | -1.5 |
| A_64_P008512  | XM_001074731 |        |            |                                                | 6.54E-01 | NS | 4.80E-01 | NS | 4.65E-02 | -1.5 |
| A_64_P039551  | BC087667     | 312651 | lft122     | intraflagellar transport 122 homolog           |          |    |          |    |          |      |
| A_44_P246010  | NM_001107783 | 311478 | Kif16b     | (Chlamydomonas)                                | 9.24E-02 | NS | 7.84E-02 | NS | 2.88E-02 | -1.5 |
| A_64_P091388  | NM_001011947 | 294804 | Rai14      | kinesin family member 16B                      | 2.10E-01 | NS | 6.80E-01 | NS | 3.78E-02 | -1.5 |
|               |              |        |            | retinoic acid induced 14                       | 1.81E-01 | NS | 7.20E-01 | NS | 4.96E-02 | -1.5 |
|               |              |        |            | leucine rich repeat (in FLII) interacting      |          |    |          |    |          |      |
| A_64_P299155  | NM_001014269 | 367314 | Lrrfp1     | protein 1                                      | 5.73E-01 | NS | 7.93E-01 | NS | 1.16E-02 | -1.5 |
| A_64_P005491  | XM_001068819 | 688916 | LOC688916  | hypothetical protein LOC688916                 | 8.62E-01 | NS | 6.00E-02 | NS | 3.10E-02 | -1.5 |
| A_64_P030145  | NM_001109317 | 501569 | Tmem47     | transmembrane protein 47                       | 1.02E-01 | NS | 3.14E-01 | NS | 3.59E-02 | -1.5 |
| A_44_P790796  | NM_001109126 | 498870 | RGD1561039 | similar to RIKEN cDNA 1700065117               | 3.07E-01 | NS | 8.23E-01 | NS | 4.93E-02 | -1.5 |
|               |              |        |            | MPV17 mitochondrial membrane protein-          |          |    |          |    |          |      |
|               |              |        |            | like 2                                         | 8.11E-02 | NS | 6.46E-02 | NS | 4.85E-02 | -1.5 |
| A_44_P142472  | NM_001106072 | 290645 | Mpv17l2    | sarcolemma associated protein                  | 9.60E-01 | NS | 6.20E-01 | NS | 1.10E-02 | -1.5 |
| A_44_P365765  | NM_001106060 | 290533 | Slmap      | carnosine dipeptidase 1 (metallopeptidase      |          |    |          |    |          |      |
|               |              |        |            | M20 family)                                    | 5.89E-01 | NS | 1.18E-01 | NS | 2.82E-02 | -1.5 |
| A_64_P110941  | NM_001007687 | 307212 | Cndp1      | iroquois homeobox 1                            | 3.45E-01 | NS | 1.29E-01 | NS | 4.05E-02 | -1.5 |
| A_64_P040734  | NM_001107331 | 306659 | Irx1       | v-erb-b2 erythroblastic leukemia viral         |          |    |          |    |          |      |
|               |              |        |            | oncogene homolog 2, neuro/glioblastoma         |          |    |          |    |          |      |
|               |              |        |            | derived oncogene homolog (avian)               |          |    |          |    |          |      |
| A_64_P109493  | NM_017003    | 24337  | ErbB2      | vacuolar protein sorting 13 homolog A (S.      | 4.59E-01 | NS | 8.66E-01 | NS | 2.00E-02 | -1.5 |
|               |              |        |            | cerevisiae)                                    |          |    |          |    |          |      |
| A_64_P163971  | AY325251     | 309243 | Vps13a     |                                                | 1.16E-01 | NS | 5.85E-02 | NS | 6.44E-03 | -1.5 |
| A_64_P010960  | XR_008157    |        |            |                                                | 2.47E-01 | NS | 5.49E-01 | NS | 2.86E-02 | -1.5 |
| A_64_P158163  | XM_001057358 |        |            |                                                | 9.06E-02 | NS | 1.31E-01 | NS | 2.39E-02 | -1.5 |
| A_64_P089265  | NM_001127563 | 499765 | RGD1564114 | similar to FLJ46082 protein                    | 3.16E-01 | NS | 8.29E-01 | NS | 1.68E-02 | -1.5 |
| A_42_P817417  | NM_017076    | 25066  | PVR        | poliovirus receptor                            | 2.25E-01 | NS | 1.00E-01 | NS | 1.83E-02 | -1.5 |
| A_64_P116331  | NM_001106686 | 298533 | Eif2c4     | eukaryotic translation initiation factor 2C, 4 | 9.41E-01 | NS | 4.33E-01 | NS | 2.36E-02 | -1.5 |
| A_44_P494097  | NM_001037347 | 245924 | Sfrs15     | splicing factor, arginine/serine-rich 15       | 2.07E-01 | NS | 6.77E-01 | NS | 1.75E-02 | -1.5 |
| A_64_P126709  | XM_001072887 |        |            |                                                | 3.26E-01 | NS | 2.84E-01 | NS | 2.91E-02 | -1.5 |
| A_64_P001809  | NM_001000713 | 404962 | Olr1523    | olfactory receptor 1523                        | 3.22E-01 | NS | 8.74E-02 | NS | 4.19E-02 | -1.5 |
| A_44_P101533  | XM_001078153 | 365984 | Siat7E     | sialyltransferase 7E                           | 7.35E-01 | NS | 1.81E-01 | NS | 4.37E-02 | -1.5 |
| A_44_P342271  | NM_001107202 | 305081 | Cd34       | CD34 molecule                                  | 1.92E-01 | NS | 6.28E-01 | NS | 3.90E-02 | -1.5 |
| A_64_P148433  | NM_203410    | 170512 | Ifi27      | interferon, alpha-inducible protein 27         | 2.76E-01 | NS | 3.21E-01 | NS | 1.81E-02 | -1.5 |
| A_64_P296046  | NM_001106461 | 295342 | Rhoc       | ras homolog gene family, member C              | 1.55E-01 | NS | 4.18E-01 | NS | 2.57E-03 | -1.5 |
| A_44_P200846  | NM_153298    | 261737 | Sfxn5      | sideroflexin 5                                 | 9.44E-02 | NS | 9.37E-01 | NS | 1.21E-02 | -1.5 |
| A_43_P14094   | XM_001073320 | 686289 | LOC686289  | similar to CG12935-PA                          | 8.77E-02 | NS | 4.80E-01 | NS | 9.87E-03 | -1.5 |
| A_64_P142660  | XM_001072513 | 684924 | LOC684924  | similar to zinc finger protein 449             | 8.83E-01 | NS | 7.51E-02 | NS | 3.82E-02 | -1.5 |
|               |              |        |            | solute carrier family 22 (organic              |          |    |          |    |          |      |
|               |              |        |            | cation/carnitine transporter), member 5        | 1.13E-01 | NS | 6.76E-01 | NS | 4.12E-03 | -1.5 |
| A_44_P1001820 | NM_019269    | 29726  | Slc22a5    | protein tyrosine phosphatase, receptor         |          |    |          |    |          |      |
|               |              |        |            | type, N polypeptide 2                          | 1.02E-01 | NS | 2.86E-01 | NS | 1.93E-02 | -1.5 |
| A_64_P047097  | NM_031600    | 29714  | Ptpm2      | yippee-like 5 (Drosophila)                     | 3.02E-01 | NS | 4.06E-01 | NS | 1.31E-02 | -1.5 |
| A_64_P154514  | NM_001035221 | 298792 | Ypel5      | similar to Cystatin S precursor (LM protein)   | 7.88E-02 | NS | 6.93E-01 | NS | 2.54E-02 | -1.5 |
| A_64_P112270  | NM_001037350 | 296235 | LOC296235  | exostoses (multiple)-like 3                    | 1.74E-01 | NS | 4.35E-01 | NS | 4.12E-02 | -1.5 |
| A_64_P161808  | NM_020097    | 56819  | Extl3      | olfactory receptor 1229                        | 2.69E-01 | NS | 7.11E-01 | NS | 3.10E-02 | -1.5 |
| A_44_P522461  | NM_001000444 | 300554 | Olr1229    |                                                |          |    |          |    |          |      |
| A_44_P1043814 | NM_001004209 | 289456 | Hsd17b11   | hydroxysteroid (17-beta) dehydrogenase 11      | 2.49E-01 | NS | 9.66E-02 | NS | 6.15E-03 | -1.5 |
|               |              |        |            | MOB1, Mps One Binder kinase activator-         |          |    |          |    |          |      |
|               |              |        |            | like 1B (yeast)                                | 6.79E-02 | NS | 8.77E-01 | NS | 3.47E-02 | -1.5 |
| A_64_P117281  | NM_001033891 | 297387 | Mobk1b     | transferrin receptor 2                         | 9.23E-01 | NS | 2.94E-01 | NS | 3.84E-02 | -1.5 |
| A_43_P22470   | NM_001105916 | 288562 | Tfr2       | gamma-aminobutyric acid (GABA) B               |          |    |          |    |          |      |
|               |              |        |            | receptor 1                                     | 2.13E-01 | NS | 7.35E-01 | NS | 2.33E-02 | -1.5 |
|               |              |        |            | calcium channel, voltage-dependent, beta 4     |          |    |          |    |          |      |
|               |              |        |            | subunit                                        | 5.26E-01 | NS | 5.62E-01 | NS | 2.59E-02 | -1.5 |
| A_64_P149300  | NM_001105733 | 58942  | Cacnb4     | apoptotic peptidase activating factor 1        | 5.60E-01 | NS | 5.51E-01 | NS | 2.82E-02 | -1.5 |
| A_64_P125033  | NM_023979    | 78963  | Apaf1      | ubiquitin specific peptidase 46                | 4.84E-01 | NS | 3.08E-01 | NS | 4.17E-02 | -1.5 |
| A_44_P700241  | XM_214034    | 289584 | Usp46      | AT rich interactive domain 4B (Rbp1 like)      | 1.07E-01 | NS | 7.10E-01 | NS | 1.40E-02 | -1.5 |
| A_64_P247966  | NM_053421    | 84481  | Arid4b     |                                                | 3.23E-01 | NS | 9.28E-01 | NS | 4.87E-02 | -1.5 |
| A_44_P527134  | BC081744     |        |            |                                                | 6.65E-01 | NS | 7.63E-01 | NS | 3.10E-02 | -1.5 |
| A_64_P033872  | NM_001037353 | 312777 | Etv6       | ets variant 6                                  |          |    |          |    |          |      |

|               |              |        |            |                                                                                                   |          |    |          |    |          |      |
|---------------|--------------|--------|------------|---------------------------------------------------------------------------------------------------|----------|----|----------|----|----------|------|
| A_44_P997174  | NM_001105757 | 246284 | Atrx       | alpha thalassemia/mental retardation syndrome X-linked (RAD54 homolog, <i>S. cerevisiae</i> )     | 7.89E-02 | NS | 3.94E-01 | NS | 2.45E-02 | -1.5 |
| A_64_P031472  | XR_005534    |        |            |                                                                                                   | 8.32E-01 | NS | 4.79E-01 | NS | 2.88E-02 | -1.5 |
| A_64_P053636  | NM_012568    | 24397  | Gira2      | glycine receptor, alpha 2                                                                         | 1.04E-01 | NS | 2.89E-01 | NS | 2.78E-02 | -1.5 |
| A_64_P009187  | NM_001106540 | 296360 | Pigt       | phosphatidylinositol glycan anchor biosynthesis, class T                                          | 6.28E-02 | NS | 4.49E-01 | NS | 1.36E-02 | -1.5 |
| A_64_P069646  | NM_001100533 | 296583 | Nacc2      | nucleus accumbens associated 2, BEN and BTB (POZ) domain containing                               | 9.86E-02 | NS | 5.52E-02 | NS | 7.71E-03 | -1.5 |
| A_44_P649177  | NM_001109292 | 500988 | RGD1564560 | similar to RCK                                                                                    | 6.08E-01 | NS | 9.75E-01 | NS | 2.46E-02 | -1.5 |
| A_64_P042505  | NM_001109330 | 501998 | Cbln3      | cerebellin 3 precursor                                                                            | 5.44E-01 | NS | 2.02E-01 | NS | 2.10E-02 | -1.5 |
| A_64_P130995  | NM_012924    | 25406  | Cd44       | Cd44 molecule                                                                                     | 8.72E-01 | NS | 8.81E-01 | NS | 4.88E-02 | -1.5 |
| A_44_P836445  | NM_001014255 | 365872 | Aph1a      | anterior pharynx defective 1 homolog A ( <i>C. elegans</i> )                                      | 5.97E-01 | NS | 7.45E-01 | NS | 1.12E-02 | -1.5 |
| A_64_P082192  | XM_001056520 |        |            |                                                                                                   | 7.02E-02 | NS | 7.35E-01 | NS | 1.19E-02 | -1.5 |
| A_64_P037010  | NM_001039337 | 362106 | Fubp3      | far upstream element (FUSE) binding protein 3                                                     | 2.98E-01 | NS | 9.86E-01 | NS | 4.15E-02 | -1.5 |
| A_44_P262608  | NM_001106403 | 294687 | Bdp1       | B double prime 1, subunit of RNA polymerase III transcription initiation factor IIIB              | 1.13E-01 | NS | 5.28E-01 | NS | 1.50E-02 | -1.5 |
| A_64_P000459  | NM_001024263 | 313834 | Prkd3      | protein kinase D3                                                                                 | 1.61E-01 | NS | 8.03E-01 | NS | 2.21E-02 | -1.5 |
| A_64_P012190  | XM_001076902 | 691123 | Fam19a3    | family with sequence similarity 19 (chemokine (C-C motif)-like), member A3                        | 6.92E-01 | NS | 8.91E-01 | NS | 2.62E-02 | -1.5 |
| A_44_P313644  | NM_031835    | 83784  | Agxt2      | alanine-glyoxylate aminotransferase 2                                                             | 5.00E-01 | NS | 8.86E-01 | NS | 4.91E-02 | -1.5 |
| A_64_P055102  | NM_001009275 | 291076 | RGD1310224 | similar to RIKEN cDNA 1810022C23                                                                  | 1.47E-01 | NS | 4.68E-01 | NS | 2.92E-02 | -1.5 |
| A_64_P000824  | NM_001037191 | 304285 | Tecpr1     | tectonin beta-propeller repeat containing 1                                                       | 1.81E-01 | NS | 5.03E-01 | NS | 1.96E-02 | -1.5 |
| A_42_P581060  | NM_001108722 | 362776 | Glrx5      | glutaredoxin 5                                                                                    | 1.60E-01 | NS | 5.48E-01 | NS | 1.64E-02 | -1.5 |
| A_44_P513490  | NM_001025636 | 291676 | RGD1311742 | similar to RIKEN cDNA 5133400G04 Mki67 (FHA domain) interacting nucleolar phosphoprotein          | 1.70E-01 | NS | 3.09E-01 | NS | 1.18E-02 | -1.5 |
| A_44_P544974  | NM_139186    | 246042 | Mki67ip    | component of oligomeric golgi complex 7                                                           | 7.15E-02 | NS | 7.15E-01 | NS | 4.42E-02 | -1.5 |
| A_64_P001892  | NM_001033889 | 293456 | Cog7       |                                                                                                   | 1.35E-01 | NS | 9.83E-02 | NS | 4.79E-02 | -1.5 |
| A_64_P023360  | XR_007134    |        |            |                                                                                                   | 9.11E-01 | NS | 8.67E-01 | NS | 2.07E-02 | -1.5 |
| A_64_P151547  | NM_001039609 | 310839 | Fnbp1l     | formin binding protein 1-like                                                                     | 1.35E-01 | NS | 1.30E-01 | NS | 4.51E-03 | -1.5 |
| A_64_P141175  | NM_001109253 | 500337 | Clec1a     | C-type lectin domain family 1, member a                                                           | 6.89E-02 | NS | 4.22E-01 | NS | 6.59E-03 | -1.5 |
| A_44_P182739  | NM_001107446 | 308000 | Pdzd8      | PDZ domain containing 8                                                                           | 8.87E-02 | NS | 5.05E-01 | NS | 3.42E-03 | -1.5 |
| A_42_P735279  | NM_001004446 | 361745 | Smarca2    | SWI/SNF related, matrix associated, actin dependent regulator of chromatin, subfamily a, member 2 | 1.45E-01 | NS | 6.09E-01 | NS | 6.77E-03 | -1.5 |
| A_43_P13843   | XM_236567    | 315959 | Msl2       | male-specific lethal 2 homolog ( <i>Drosophila</i> )                                              | 1.75E-01 | NS | 3.06E-01 | NS | 6.89E-03 | -1.5 |
| A_64_P106112  | XM_002724884 |        |            |                                                                                                   | 1.10E-01 | NS | 7.20E-01 | NS | 2.94E-02 | -1.5 |
| A_64_P100904  | NM_001145726 | 688966 | LOC688966  | similar to K11B4.2                                                                                | 4.45E-01 | NS | 9.85E-01 | NS | 4.65E-02 | -1.5 |
| A_64_P135340  | AY325162     |        |            |                                                                                                   | 5.07E-01 | NS | 1.00E-01 | NS | 1.95E-02 | -1.5 |
| A_64_P043194  | XM_001081124 | 296145 | Fbln7      | fibulin 7                                                                                         | 6.06E-02 | NS | 6.38E-01 | NS | 4.89E-02 | -1.5 |
| A_43_P12012   | NM_001005330 | 54243  | Cr1l       | complement component (3b/4b) receptor 1-like                                                      | 8.69E-02 | NS | 6.24E-01 | NS | 2.93E-02 | -1.5 |
| A_44_P282794  | NM_001107523 | 308738 | Chd2       | chromodomain helicase DNA binding protein 2                                                       | 1.29E-01 | NS | 7.82E-01 | NS | 5.95E-03 | -1.5 |
| A_44_P437532  | NM_001105960 | 289088 | RGD1308695 | similar to RIKEN cDNA 1200016B10                                                                  | 1.75E-01 | NS | 1.14E-01 | NS | 1.23E-02 | -1.5 |
| A_44_P382318  | NM_001108617 | 362316 | Ptk1       | PFTAIRE protein kinase 1                                                                          | 2.44E-01 | NS | 2.63E-01 | NS | 9.45E-03 | -1.5 |
| A_44_P687053  | XM_001072919 |        |            |                                                                                                   | 2.29E-01 | NS | 1.04E-01 | NS | 9.41E-03 | -1.5 |
| A_64_P009425  | NM_001012048 | 306376 | Sh2d4a     | SH2 domain containing 4A                                                                          | 2.81E-01 | NS | 8.80E-01 | NS | 2.50E-02 | -1.5 |
| A_64_P122046  | XM_001056119 | 680207 | LOC680207  | hypothetical protein LOC680207                                                                    | 1.43E-01 | NS | 7.58E-01 | NS | 3.46E-02 | -1.5 |
| A_44_P550765  | NM_001106088 | 290823 | Erlin2     | ER lipid raft associated 2                                                                        | 7.29E-01 | NS | 3.84E-01 | NS | 9.90E-03 | -1.5 |
| A_44_P1048380 | NM_001106844 | 300870 | Fam46a     | family with sequence similarity 46, member A                                                      | 5.52E-01 | NS | 2.34E-01 | NS | 3.10E-02 | -1.5 |
| A_64_P100768  | XM_001056626 | 363216 | Ccnm4      | cyclin M4                                                                                         | 8.71E-02 | NS | 5.93E-01 | NS | 1.95E-02 | -1.5 |
| A_64_P024733  | BE113996     |        |            |                                                                                                   | 7.43E-01 | NS | 5.35E-01 | NS | 1.88E-02 | -1.5 |
| A_64_P015099  | NM_001109672 | 500715 | Ccnk       | cyclin K                                                                                          | 7.73E-01 | NS | 9.31E-01 | NS | 4.41E-02 | -1.5 |

|              |              |        |            |                                                                                                  |          |    |          |    |          |      |
|--------------|--------------|--------|------------|--------------------------------------------------------------------------------------------------|----------|----|----------|----|----------|------|
| A_64_P078091 | XM_001060960 | 681254 | Tusc1      | tumor suppressor candidate 1                                                                     | 4.00E-01 | NS | 2.85E-01 | NS | 4.83E-02 | -1.5 |
| A_43_P15292  | NM_022597    | 64529  | Ctsb       | cathepsin B                                                                                      | 1.06E-01 | NS | 7.53E-01 | NS | 2.36E-02 | -1.5 |
| A_64_P121026 | XM_228058    |        |            |                                                                                                  | 6.00E-01 | NS | 4.18E-01 | NS | 1.24E-02 | -1.5 |
| A_64_P058800 | NM_001107123 | 304302 | Zfp469     | zinc finger protein 469                                                                          | 6.49E-01 | NS | 2.44E-01 | NS | 1.66E-02 | -1.5 |
| A_64_P014096 | NM_024394    | 79246  | Htr3a      | 5-hydroxytryptamine (serotonin) receptor 3a                                                      | 6.80E-02 | NS | 2.79E-01 | NS | 2.90E-02 | -1.5 |
| A_44_P306204 | NM_001100634 | 24848  | Tph1       | tryptophan hydroxylase 1                                                                         | 5.48E-01 | NS | 9.00E-02 | NS | 3.83E-02 | -1.5 |
| A_64_P059750 | NM_001109060 | 498130 | Stard13    | StAR-related lipid transfer (START) domain containing 13                                         | 8.65E-02 | NS | 3.45E-01 | NS | 1.27E-02 | -1.5 |
| A_64_P160760 | NM_031080    | 81744  | Pde7a      | phosphodiesterase 7A                                                                             | 8.44E-02 | NS | 5.60E-01 | NS | 3.90E-02 | -1.5 |
| A_64_P060569 | BC105852     | 315222 | Arsa       | arylsulfatase A                                                                                  | 7.51E-02 | NS | 8.03E-01 | NS | 2.49E-02 | -1.5 |
| A_42_P693191 | NM_134384    | 171403 | Spata19    | spermatogenesis associated 19                                                                    | 1.43E-01 | NS | 3.40E-01 | NS | 3.92E-02 | -1.5 |
| A_64_P102191 | NM_017011    | 24414  | Grm1       | glutamate receptor, metabotropic 1                                                               | 4.47E-01 | NS | 1.75E-01 | NS | 3.65E-02 | -1.4 |
| A_43_P14690  | NM_001108082 | 314743 | Pctk2      | PCTAIRE protein kinase 2                                                                         | 2.47E-01 | NS | 9.20E-01 | NS | 1.20E-02 | -1.4 |
| A_64_P108623 | NM_134350    | 286918 | Mx2        | myxovirus (influenza virus) resistance 2                                                         | 1.31E-01 | NS | 3.28E-01 | NS | 2.91E-03 | -1.4 |
| A_42_P499282 | NM_001031660 | 361286 | Msrb2      | methionine sulfoxide reductase B2                                                                | 1.55E-01 | NS | 8.13E-01 | NS | 1.57E-02 | -1.4 |
| A_64_P078827 | NM_001009502 | 494219 | Aer61      | glycosyltransferase Aer61                                                                        | 9.99E-01 | NS | 5.00E-01 | NS | 2.68E-02 | -1.4 |
| A_64_P161621 | NM_001101015 | 687399 | LOC687399  | hypothetical protein LOC687399                                                                   | 3.73E-01 | NS | 7.38E-01 | NS | 1.17E-02 | -1.4 |
| A_64_P050685 | NM_001108626 | 362347 | LOC362347  | similar to protease, serine, 3 (mesotrypsin)                                                     | 2.32E-01 | NS | 2.07E-01 | NS | 2.01E-02 | -1.4 |
| A_64_P122489 | NM_017016    | 24443  | Hdc        | histidine decarboxylase                                                                          | 5.23E-01 | NS | 6.94E-01 | NS | 1.18E-02 | -1.4 |
| A_44_P164824 | NM_001107124 | 304315 | Ttyh3      | tweety homolog 3 (Drosophila)                                                                    | 3.76E-01 | NS | 1.78E-01 | NS | 3.47E-02 | -1.4 |
| A_64_P127516 | NM_001173451 | 681059 | Vps25      | vacuolar protein sorting 25 homolog (S. cerevisiae)                                              | 9.93E-02 | NS | 1.27E-01 | NS | 3.11E-02 | -1.4 |
| A_64_P036925 | NM_012532    | 24268  | Cp         | ceruloplasmin                                                                                    | 7.31E-01 | NS | 8.25E-01 | NS | 1.66E-02 | -1.4 |
| A_44_P684315 | NM_001109104 | 498546 | Serp2      | stress-associated endoplasmic reticulum protein family member 2                                  | 1.98E-01 | NS | 9.58E-01 | NS | 1.48E-02 | -1.4 |
| A_42_P512417 | NM_019252    | 29640  | Dpm2       | dolichyl-phosphate mannosyltransferase polypeptide 2, regulatory subunit                         | 7.32E-02 | NS | 1.39E-01 | NS | 2.82E-02 | -1.4 |
| A_43_P15804  | NM_001100639 | 171068 | Pou2f1     | POU domain, class 2, transcription factor 1                                                      | 2.31E-01 | NS | 4.18E-01 | NS | 2.14E-02 | -1.4 |
| A_64_P108379 | NM_001108807 | 363273 | Cops7b     | COP9 constitutive photomorphogenic homolog subunit 7B (Arabidopsis)                              | 4.42E-01 | NS | 7.68E-01 | NS | 1.36E-02 | -1.4 |
| A_44_P496211 | NM_057139    | 117280 | Hnrmpu     | heterogeneous nuclear ribonucleoprotein U                                                        | 1.15E-01 | NS | 7.91E-01 | NS | 4.84E-02 | -1.4 |
| A_64_P078006 | XM_002726483 |        |            |                                                                                                  | 1.49E-01 | NS | 9.90E-01 | NS | 4.00E-02 | -1.4 |
| A_64_P013688 | AY383694     |        |            |                                                                                                  | 6.24E-01 | NS | 8.58E-01 | NS | 2.17E-03 | -1.4 |
| A_44_P161692 | NM_001025699 | 313618 | Tmem57     | transmembrane protein 57                                                                         | 7.52E-02 | NS | 6.46E-01 | NS | 7.89E-03 | -1.4 |
| A_44_P575662 | NM_001039345 | 500502 | Afaf       | Acrosome formation associated factor ankyrin repeat and LEM domain containing 2                  | 9.56E-02 | NS | 7.82E-01 | NS | 3.43E-02 | -1.4 |
| A_44_P524830 | NM_001047901 | 360829 | Ankle2     |                                                                                                  | 4.22E-01 | NS | 9.82E-01 | NS | 1.49E-02 | -1.4 |
| A_64_P062894 | NM_001109124 | 498858 | Ccdc112    | coiled-coil domain containing 112                                                                | 1.42E-01 | NS | 4.92E-01 | NS | 4.88E-02 | -1.4 |
| A_64_P130523 | NM_181476    | 353250 | Niacr1     | niacin receptor 1                                                                                | 1.24E-01 | NS | 9.18E-02 | NS | 3.51E-02 | -1.4 |
| A_64_P054538 | NM_031818    | 83718  | Clic4      | chloride intracellular channel 4                                                                 | 3.85E-01 | NS | 4.45E-01 | NS | 1.32E-02 | -1.4 |
| A_64_P109603 | BC089781     | 117279 | Cflar      | CASP8 and FADD-like apoptosis regulator                                                          | 3.00E-01 | NS | 4.04E-01 | NS | 3.72E-03 | -1.4 |
| A_64_P138924 | NM_001106429 | 295010 | Pabpc4l    | poly(A) binding protein, cytoplasmic 4-like cyclin-dependent kinase-like 2 (CDC2-related kinase) | 2.05E-01 | NS | 7.94E-01 | NS | 3.68E-02 | -1.4 |
| A_64_P038747 | NM_001012035 | 305242 | Cdkl2      |                                                                                                  | 2.06E-01 | NS | 3.72E-01 | NS | 2.44E-02 | -1.4 |
| A_64_P055853 | XM_001056356 | 680258 | Zfp748     | zinc finger protein 748                                                                          | 3.27E-01 | NS | 5.31E-01 | NS | 3.83E-02 | -1.4 |
| A_64_P091078 | NM_001107183 | 304833 | Trove2     | TROVE domain family, member 2                                                                    | 1.26E-01 | NS | 9.64E-02 | NS | 2.78E-02 | -1.4 |
| A_64_P075396 | XM_001059994 |        |            |                                                                                                  | 6.11E-02 | NS | 6.16E-02 | NS | 4.86E-02 | -1.4 |
| A_64_P115666 | NM_022196    | 60584  | Lif        | leukemia inhibitory factor                                                                       | 2.09E-01 | NS | 3.80E-01 | NS | 1.36E-02 | -1.4 |
| A_64_P027814 | XM_001060134 | 290571 | Znf488     | zinc finger protein 488                                                                          | 6.77E-01 | NS | 6.66E-01 | NS | 3.84E-02 | -1.4 |
| A_64_P083625 | XR_008432    |        |            |                                                                                                  | 2.48E-01 | NS | 5.08E-01 | NS | 7.73E-03 | -1.4 |
| A_64_P080248 | NM_001011978 | 298541 | Dhdds      | dehydrodolichyl diphosphate synthase                                                             | 1.38E-01 | NS | 3.12E-01 | NS | 3.48E-02 | -1.4 |
| A_64_P137828 | NM_138531    | 171565 | Stambp     | Stam binding protein                                                                             | 1.63E-01 | NS | 8.76E-01 | NS | 1.05E-02 | -1.4 |
| A_64_P118862 | XM_001067563 | 501036 | Plscr5     | phospholipid scramblase family, member 5                                                         | 6.94E-01 | NS | 3.29E-01 | NS | 2.26E-02 | -1.4 |
| A_64_P003393 | XM_002725396 | 307901 | RGD1308461 | similar to RIKEN cDNA 4632415K11                                                                 | 2.70E-01 | NS | 4.41E-01 | NS | 3.51E-02 | -1.4 |
| A_64_P077406 | NM_001106210 | 292306 | Rnaset2    | ribonuclease T2                                                                                  | 1.81E-01 | NS | 2.27E-01 | NS | 1.77E-02 | -1.4 |
| A_64_P121485 | XM_001074743 | 690538 | Scai       | suppressor of cancer cell invasion                                                               | 8.69E-02 | NS | 3.68E-01 | NS | 3.83E-02 | -1.4 |
| A_43_P12973  | NM_053895    | 116675 | Pgap2      | post-GPI attachment to proteins 2                                                                | 2.72E-01 | NS | 5.56E-01 | NS | 2.41E-02 | -1.4 |
| A_64_P120307 | NM_001012140 | 360571 | Rab34      | RAB34, member RAS oncogene family                                                                | 1.48E-01 | NS | 5.97E-01 | NS | 7.74E-03 | -1.4 |

|              |              |        |            |                                                                                                                                     |          |    |          |    |          |      |
|--------------|--------------|--------|------------|-------------------------------------------------------------------------------------------------------------------------------------|----------|----|----------|----|----------|------|
| A_64_P162097 | XM_001072893 | 690008 | LOC690008  | hypothetical protein LOC690008                                                                                                      | 7.26E-01 | NS | 7.75E-01 | NS | 3.65E-02 | -1.4 |
| A_42_P665627 | NM_023095    | 65271  | Mgat5      | mannosyl (alpha-1,6-)-glycoprotein beta-1,6-N-acetyl-glucosaminyltransferase                                                        | 8.20E-01 | NS | 6.60E-01 | NS | 2.76E-02 | -1.4 |
| A_43_P18203  | NM_001025698 | 313583 | Sf3a3      | splicing factor 3a, subunit 3                                                                                                       | 5.40E-02 | NS | 7.28E-01 | NS | 2.62E-02 | -1.4 |
| A_64_P145847 | NM_001109484 | 685867 | Myl6       | myosin, light chain 6, alkali, smooth muscle and non-muscle                                                                         | 7.70E-02 | NS | 2.58E-01 | NS | 1.73E-02 | -1.4 |
| A_43_P11370  | NM_207601    | 302562 | Plp2       | proteolipid protein 2 (colonic epithelium-enriched)                                                                                 | 2.91E-01 | NS | 6.42E-01 | NS | 7.13E-03 | -1.4 |
| A_64_P057383 | XM_001078969 |        |            |                                                                                                                                     | 8.84E-02 | NS | 3.17E-01 | NS | 1.85E-02 | -1.4 |
| A_64_P156105 | NM_001000923 | 405239 | Olr714     | olfactory receptor 714                                                                                                              | 4.48E-01 | NS | 2.23E-01 | NS | 1.17E-02 | -1.4 |
| A_43_P12624  | NM_031655    | 59073  | Lxn        | latexin                                                                                                                             | 2.50E-01 | NS | 6.13E-01 | NS | 3.19E-03 | -1.4 |
| A_64_P095710 | NM_040669    | 114638 | Hps1       | Hermansky-Pudlak syndrome 1 homolog (human)                                                                                         | 4.31E-01 | NS | 7.61E-01 | NS | 1.31E-02 | -1.4 |
| A_42_P698972 | NM_033098    | 25217  | Tapbp      | TAP binding protein                                                                                                                 | 1.48E-01 | NS | 4.90E-01 | NS | 2.37E-02 | -1.4 |
| A_44_P575687 | XM_001077402 | 691254 | LOC691254  | hypothetical protein LOC691254                                                                                                      | 5.93E-02 | NS | 4.28E-01 | NS | 2.18E-02 | -1.4 |
| A_42_P468771 | NM_001107362 | 307075 | Wdr37      | WD repeat domain 37                                                                                                                 | 2.01E-01 | NS | 9.74E-01 | NS | 1.37E-02 | -1.4 |
| A_43_P11604  | NM_012886    | 25358  | Timp3      | TIMP metalloproteinase inhibitor 3                                                                                                  | 2.12E-01 | NS | 6.33E-01 | NS | 4.43E-02 | -1.4 |
| A_64_P053726 | NM_001106990 | 303000 | Solh       | small optic lobes homolog (Drosophila)                                                                                              | 5.32E-01 | NS | 7.67E-01 | NS | 2.04E-02 | -1.4 |
| A_64_P149909 | NM_172063    | 64460  | Pex14      | peroxisomal biogenesis factor 14                                                                                                    | 1.11E-01 | NS | 1.07E-01 | NS | 2.89E-02 | -1.4 |
| A_64_P013324 | NM_001107865 | 312451 | Tcf3       | transcription factor 3                                                                                                              | 2.46E-01 | NS | 6.98E-01 | NS | 2.12E-02 | -1.4 |
| A_64_P085607 | NM_001047864 | 297576 | Dppa3      | developmental pluripotency-associated 3                                                                                             | 8.11E-01 | NS | 9.77E-01 | NS | 1.23E-02 | -1.4 |
| A_42_P601850 | NM_001047893 | 317435 | Shroom2    | shroom family member 2                                                                                                              | 1.01E-01 | NS | 3.03E-01 | NS | 1.48E-02 | -1.4 |
| A_64_P118997 | XR_008889    |        |            |                                                                                                                                     | 4.22E-01 | NS | 7.62E-01 | NS | 1.80E-02 | -1.4 |
| A_64_P094806 | NM_001135084 | 680201 | Zfp322a    | zinc finger protein 322a                                                                                                            | 3.86E-01 | NS | 5.01E-01 | NS | 3.04E-03 | -1.4 |
| A_64_P057631 | NM_176861    | 294961 | Kcnmb2     | potassium large conductance calcium-activated channel, subfamily M, beta member 2                                                   | 2.30E-01 | NS | 2.33E-01 | NS | 3.62E-02 | -1.4 |
| A_64_P218751 | U78129       |        |            |                                                                                                                                     | 4.29E-01 | NS | 8.31E-01 | NS | 1.68E-02 | -1.4 |
| A_64_P079900 | NM_001134991 | 309613 | Ng35       | Ng35 pseudogene                                                                                                                     | 6.52E-01 | NS | 8.39E-01 | NS | 4.15E-02 | -1.4 |
| A_64_P024997 | XM_001079005 | 691608 | LOC691608  | hypothetical protein LOC691608                                                                                                      | 2.55E-01 | NS | 2.97E-01 | NS | 1.69E-02 | -1.4 |
| A_44_P518233 | NM_001106512 | 296162 | Ddrgk1     | DDRKG domain containing 1                                                                                                           | 1.57E-01 | NS | 8.85E-01 | NS | 2.13E-02 | -1.4 |
| A_64_P109729 | XM_001057297 | 503252 | RGD1565095 | similar to hypothetical protein MGC52110 similar to solute carrier family 7 (cationic amino acid transporter, y+ system), member 12 | 5.79E-01 | NS | 1.80E-01 | NS | 3.58E-02 | -1.4 |
| A_64_P000525 | NM_001017465 | 361914 | LOC361914  | member 12                                                                                                                           | 3.05E-01 | NS | 3.79E-01 | NS | 3.36E-02 | -1.4 |
| A_64_P358316 | XM_002726079 | 362096 | Setx       | senataxin                                                                                                                           | 1.39E-01 | NS | 3.13E-01 | NS | 3.55E-03 | -1.4 |
| A_64_P101449 | NM_001037188 | 302998 | RGD1307155 | similar to CG18661-PA                                                                                                               | 1.54E-01 | NS | 8.55E-01 | NS | 3.16E-02 | -1.4 |
| A_64_P165150 | NM_172021    | 266764 | Tbkbp1     | TBK1 binding protein 1                                                                                                              | 9.20E-01 | NS | 3.98E-01 | NS | 3.64E-02 | -1.4 |
| A_64_P035852 | XM_001058603 | 498385 | RGD1561241 | similar to Mblk1-related protein-1                                                                                                  | 5.08E-02 | NS | 6.53E-02 | NS | 3.97E-02 | -1.4 |
| A_64_P042415 | NM_173096    | 24575  | Mx1        | myxovirus (influenza virus) resistance 1                                                                                            | 1.14E-01 | NS | 8.16E-01 | NS | 2.42E-02 | -1.4 |
| A_42_P763522 | NM_001013980 | 304138 | Cypr1      | cysteine/tyrosine-rich 1                                                                                                            | 1.72E-01 | NS | 1.80E-01 | NS | 2.21E-02 | -1.4 |
| A_64_P051527 | NM_001109593 | 690460 | LOC690460  | similar to keratin associated protein 10-7                                                                                          | 8.95E-01 | NS | 2.08E-01 | NS | 1.24E-02 | -1.4 |
| A_64_P008672 | XM_224732    |        |            |                                                                                                                                     | 8.45E-01 | NS | 5.03E-01 | NS | 3.26E-02 | -1.4 |
| A_44_P352152 | XM_220319    |        |            |                                                                                                                                     | 2.14E-01 | NS | 8.80E-01 | NS | 3.24E-02 | -1.4 |
| A_64_P112644 | NM_001107470 | 308282 | Shprh      | SNF2 histone linker PHD RING helicase                                                                                               | 7.57E-01 | NS | 2.93E-01 | NS | 4.44E-02 | -1.4 |
| A_44_P529299 | NM_184046    | 297383 | Rtkn       | rhotekin                                                                                                                            | 4.08E-01 | NS | 2.23E-01 | NS | 2.84E-02 | -1.4 |
| A_64_P093026 | NM_001015028 | 362515 | Anks6      | ankyrin repeat and sterile alpha motif domain containing 6                                                                          | 2.20E-01 | NS | 2.23E-01 | NS | 3.36E-02 | -1.4 |
| A_64_P164330 | NM_001098216 | 294299 | Tead3      | TEA domain family member 3                                                                                                          | 1.07E-01 | NS | 7.56E-01 | NS | 2.30E-02 | -1.4 |
| A_64_P076402 | XR_008228    | 688634 | LOC688634  | similar to Histone acetyltransferase MYST4 (MYST protein 4) (MOZ, YBF2/SAS3, SAS2 and TIP60 protein 4) (Querkopf protein)           | 4.91E-01 | NS | 7.29E-01 | NS | 2.15E-02 | -1.4 |
| A_44_P279398 | XM_340956    | 292172 | Eya4       | eyes absent homolog 4 (Drosophila)                                                                                                  | 1.94E-01 | NS | 5.91E-01 | NS | 1.83E-02 | -1.4 |
| A_64_P060268 | XM_001079962 |        |            |                                                                                                                                     | 7.66E-02 | NS | 1.03E-01 | NS | 3.80E-02 | -1.4 |
| A_42_P514798 | NM_001107953 | 313481 | Zcchc11    | zinc finger, CCHC domain containing 11                                                                                              | 7.43E-01 | NS | 7.96E-01 | NS | 4.95E-02 | -1.4 |
| A_64_P104850 | NM_001126096 | 690354 | Lymr2      | LYR motif containing 2                                                                                                              | 2.95E-01 | NS | 2.76E-01 | NS | 1.85E-02 | -1.4 |
| A_64_P159598 | NM_001107519 | 308668 | Nipa1      | non imprinted in Prader-Willi/Angelman syndrome 1 homolog (human)                                                                   | 1.95E-01 | NS | 7.05E-01 | NS | 7.57E-03 | -1.4 |
| A_64_P048720 | NM_138539    | 171575 | Dnase2a    | deoxyribonuclease II alpha                                                                                                          | 1.31E-01 | NS | 9.97E-01 | NS | 3.10E-03 | -1.4 |

|               |              |        |            |                                                                                                                             |          |    |          |    |          |      |
|---------------|--------------|--------|------------|-----------------------------------------------------------------------------------------------------------------------------|----------|----|----------|----|----------|------|
| A_64_P082883  | NM_024485    | 79557  | Chrna1     | cholinergic receptor, nicotinic, alpha 1 (muscle)                                                                           | 5.81E-01 | NS | 6.90E-01 | NS | 2.34E-02 | -1.4 |
| A_64_P048466  | NM_001109342 | 502648 | Pramel6    | preferentially expressed antigen in melanoma-like 6                                                                         | 9.44E-01 | NS | 2.63E-01 | NS | 3.61E-02 | -1.4 |
| A_64_P030322  | NM_199096    | 298598 | Necap2     | NECAP endocytosis associated 2 similar to chromosome 14 open reading frame 166B                                             | 6.40E-02 | NS | 1.48E-01 | NS | 4.65E-02 | -1.4 |
| A_64_P127753  | NM_001037783 | 314328 | LOC314328  | frame 166B                                                                                                                  | 5.68E-01 | NS | 5.69E-01 | NS | 2.99E-02 | -1.4 |
| A_64_P031875  | NM_001098803 | 305888 | Zfx2       | zinc finger homeobox 2                                                                                                      | 3.61E-01 | NS | 4.86E-01 | NS | 2.88E-02 | -1.4 |
| A_64_P041019  | NM_001109111 | 498630 | Wwc2       | WW and C2 domain containing 2                                                                                               | 3.06E-01 | NS | 9.73E-01 | NS | 6.20E-03 | -1.4 |
| A_64_P000549  | XM_001070971 |        |            |                                                                                                                             | 8.58E-01 | NS | 9.43E-01 | NS | 3.47E-02 | -1.4 |
| A_64_P071485  | NM_001109293 | 500993 | RGD1563941 | similar to hypothetical protein FLJ20010                                                                                    | 1.69E-01 | NS | 4.03E-01 | NS | 2.79E-02 | -1.4 |
| A_44_P273888  | NM_001000916 | 405231 | Olr786     | olfactory receptor 786                                                                                                      | 1.38E-01 | NS | 1.27E-01 | NS | 3.22E-02 | -1.4 |
| A_44_P149267  | NM_001013099 | 299139 | Slc38a6    | solute carrier family 38, member 6                                                                                          | 1.44E-01 | NS | 2.17E-01 | NS | 4.33E-02 | -1.4 |
| A_44_P281733  | XM_001075398 | 287362 | Nlrp3      | NLR family, pyrin domain containing 3                                                                                       | 1.14E-01 | NS | 7.31E-01 | NS | 4.85E-02 | -1.4 |
| A_64_P084284  | NM_001001084 | 405975 | Olr1233    | olfactory receptor 1233                                                                                                     | 7.98E-01 | NS | 9.03E-02 | NS | 4.33E-02 | -1.4 |
| A_64_P048280  | NM_001173472 | 498886 | RGD1562987 | similar to cDNA sequence BC031181                                                                                           | 6.41E-02 | NS | 8.57E-02 | NS | 2.46E-02 | -1.4 |
| A_64_P120584  | NM_001106546 | 296399 | Zfp93      | zinc finger protein 93                                                                                                      | 7.06E-02 | NS | 9.68E-01 | NS | 1.58E-02 | -1.4 |
| A_64_P063993  | NM_001013214 | 362556 | Ttc4       | tetratricopeptide repeat domain 4 PRP39 pre-mRNA processing factor 39 homolog (S. cerevisiae)                               | 3.80E-01 | NS | 2.25E-01 | NS | 2.49E-02 | -1.4 |
| A_44_P356707  | NM_001108026 | 314171 | Prpf39     | Finkel-Biskis-Reilly murine sarcoma virus (FBR-MuSV) ubiquitously expressed nuclear receptor subfamily 2, group F, member 2 | 2.81E-01 | NS | 6.75E-01 | NS | 1.73E-02 | -1.4 |
| A_64_P020159  | NM_001012739 | 29752  | Fau        | v-ral simian leukemia viral oncogene homolog A (ras related)                                                                | 2.48E-01 | NS | 8.46E-01 | NS | 3.28E-02 | -1.4 |
| A_44_P421333  | NM_080778    | 113984 | Nr2f2      | nuclear factor related to kappa B binding protein                                                                           | 9.46E-01 | NS | 2.61E-01 | NS | 1.45E-02 | -1.4 |
| A_44_P116449  | NM_031093    | 81757  | Rala       | homolog A (ras related)                                                                                                     | 2.48E-01 | NS | 4.97E-01 | NS | 1.31E-02 | -1.4 |
| A_64_P060598  | NM_031789    | 83619  | Nfe2l2     | nuclear factor, erythroid derived 2, like 2                                                                                 | 3.27E-01 | NS | 1.74E-01 | NS | 1.24E-02 | -1.4 |
| A_44_P374771  | NM_001000402 | 298044 | Olr848     | olfactory receptor 848                                                                                                      | 5.47E-01 | NS | 5.53E-01 | NS | 4.86E-02 | -1.4 |
| A_64_P044873  | NM_001109391 | 680102 | Mab21l2    | mab-21-like 2 (C. elegans)                                                                                                  | 9.62E-01 | NS | 2.30E-01 | NS | 1.19E-02 | -1.4 |
| A_44_P1011244 | NM_001005532 | 287798 | MGC95210   | hypothetical LOC287798                                                                                                      | 1.27E-01 | NS | 2.22E-01 | NS | 2.43E-02 | -1.4 |
| A_44_P607412  | NM_001108133 | 315523 | Nfrkb      | nuclear factor related to kappa B binding protein                                                                           | 5.44E-01 | NS | 2.97E-01 | NS | 3.17E-02 | -1.4 |
| A_64_P002289  | NM_001142757 | 315101 | Zfp7       | zinc finger protein 7                                                                                                       | 2.79E-01 | NS | 8.98E-01 | NS | 8.95E-03 | -1.4 |
| A_64_P148115  | NM_001008369 | 361694 | Pitpnm1    | phosphatidylinositol transfer protein, membrane-associated 1                                                                | 8.59E-02 | NS | 4.90E-01 | NS | 3.56E-02 | -1.4 |
| A_44_P871648  | NM_001007724 | 360639 | Dcakd      | dephospho-CoA kinase domain containing                                                                                      | 1.03E-01 | NS | 4.52E-01 | NS | 3.95E-02 | -1.4 |
| A_64_P106553  | XM_001058677 | 680745 | LOC680745  | hypothetical protein LOC680745                                                                                              | 6.20E-01 | NS | 6.40E-01 | NS | 2.32E-02 | -1.4 |
| A_64_P041016  | NM_001109111 | 498630 | Wwc2       | WW and C2 domain containing 2                                                                                               | 8.02E-02 | NS | 7.89E-01 | NS | 3.67E-02 | -1.4 |
| A_44_P930446  | XM_001062249 | 685088 | She        | Src homology 2 domain containing E                                                                                          | 1.95E-01 | NS | 3.78E-01 | NS | 3.06E-02 | -1.4 |
| A_64_P057907  | NM_001106267 | 292995 | Tm2d3      | TM2 domain containing 3                                                                                                     | 8.51E-02 | NS | 5.12E-02 | NS | 1.70E-02 | -1.4 |
| A_43_P21574   | NM_001012043 | 306066 | Tdrd3      | tudor domain containing 3                                                                                                   | 2.18E-01 | NS | 4.15E-01 | NS | 1.39E-02 | -1.4 |
| A_64_P056928  | XM_001057556 | 310418 | Frem2      | Fras1 related extracellular matrix protein 2                                                                                | 4.97E-01 | NS | 3.04E-01 | NS | 1.38E-02 | -1.4 |
| A_64_P144933  | NM_001106383 | 294341 | Slc5a4a    | solute carrier family 5, member 4a spectrin repeat containing, nuclear envelope 1                                           | 3.38E-01 | NS | 9.69E-02 | NS | 1.21E-02 | -1.4 |
| A_42_P807826  | AY597251     | 499010 | Syne1      | amyloid beta precursor protein (cytoplasmic tail) binding protein 2                                                         | 4.80E-01 | NS | 8.84E-01 | NS | 1.25E-02 | -1.4 |
| A_64_P073283  | NM_001100969 | 303396 | Appbp2     | pim-1 oncogene                                                                                                              | 2.66E-01 | NS | 2.42E-01 | NS | 4.90E-02 | -1.4 |
| A_64_P042183  | NM_017034    | 24649  | Pim1       | neurofibromin 1                                                                                                             | 9.04E-01 | NS | 6.98E-01 | NS | 4.97E-02 | -1.4 |
| A_64_P142580  | NM_012609    | 24592  | Nf1        | serine/threonine kinase 19                                                                                                  | 5.05E-01 | NS | 3.41E-01 | NS | 1.77E-02 | -1.4 |
| A_64_P012021  | NM_001013197 | 361800 | Stk19      | transmembrane and tetratricopeptide repeat containing 4                                                                     | 3.27E-01 | NS | 8.35E-01 | NS | 3.39E-02 | -1.4 |
| A_64_P088695  | NM_001134414 | 290501 | Tmtc4      | ring finger protein 216                                                                                                     | 4.23E-01 | NS | 6.20E-01 | NS | 2.17E-02 | -1.4 |
| A_64_P063903  | NM_001107122 | 304294 | Rnf216     | abhydrolase domain containing 8                                                                                             | 9.22E-01 | NS | 7.45E-01 | NS | 1.38E-02 | -1.4 |
| A_64_P088447  | NM_001107301 | 306338 | Abhd8      | Rho family GTPase 3                                                                                                         | 9.60E-02 | NS | 3.14E-01 | NS | 3.89E-02 | -1.4 |
| A_44_P414460  | NM_001007641 | 295588 | Rnd3       | Cas-Br-M (murine) ecotropic retroviral transforming sequence-like 1                                                         | 4.77E-01 | NS | 3.91E-01 | NS | 3.12E-02 | -1.4 |
| A_64_P072813  | FQ212058     |        |            | acetyl-Coenzyme A acetyltransferase 2                                                                                       | 9.04E-02 | NS | 7.57E-01 | NS | 2.35E-02 | -1.4 |
| A_44_P309573  | NM_001108018 | 314028 | Cbll1      |                                                                                                                             | 1.97E-01 | NS | 1.47E-01 | NS | 4.90E-02 | -1.4 |
| A_64_P024620  | NM_001006995 | 308100 | Acat2      |                                                                                                                             | 3.72E-01 | NS | 8.21E-01 | NS | 4.00E-02 | -1.4 |

|               |              |        |            |                                                                                                                 |          |    |          |    |          |      |
|---------------|--------------|--------|------------|-----------------------------------------------------------------------------------------------------------------|----------|----|----------|----|----------|------|
| A_64_P054606  | NM_001107279 | 306055 | Pcdh17     | protocadherin 17<br>leucine-rich repeats and IQ motif containing 1                                              | 3.80E-01 | NS | 2.00E-01 | NS | 1.31E-02 | -1.4 |
| A_44_P126545  | XM_001080693 | 299759 | Lrriq1     |                                                                                                                 | 8.37E-01 | NS | 2.16E-01 | NS | 3.15E-02 | -1.4 |
| A_64_P155393  | NM_171992    | 58919  | Ccnd1      | cyclin D1                                                                                                       | 6.81E-01 | NS | 2.07E-01 | NS | 3.64E-02 | -1.4 |
| A_64_P132601  | NM_001107154 | 304580 | Ssh1       | slingshot homolog 1 (Drosophila)                                                                                | 1.26E-02 | NS | 6.66E-01 | NS | 1.15E-02 | -1.4 |
| A_64_P163987  | NM_001108800 | 363243 | Klf7       | Kruppel-like factor 7 (ubiquitous)                                                                              | 2.25E-01 | NS | 2.10E-01 | NS | 1.50E-02 | -1.4 |
| A_64_P035766  | NM_001047908 | 361902 | Heatr7b2   | HEAT repeat family member 7B2                                                                                   | 6.71E-01 | NS | 3.57E-01 | NS | 2.61E-02 | -1.4 |
| A_64_P020581  | NM_001108785 | 363158 | Crtp       | cartilage associated protein                                                                                    | 1.22E-01 | NS | 9.97E-01 | NS | 4.94E-03 | -1.4 |
| A_64_P036656  | NM_153727    | 266769 | Gpr3       | G protein-coupled receptor 3                                                                                    | 2.23E-01 | NS | 5.31E-01 | NS | 1.68E-02 | -1.4 |
| A_42_P768978  | NM_145098    | 246331 | Nrp1       | neuropilin 1                                                                                                    | 6.70E-01 | NS | 8.12E-01 | NS | 1.53E-02 | -1.4 |
| A_64_P053896  | NM_001109384 | 679944 | Alkbh7     | alkB, alkylation repair homolog 7 (E. coli)                                                                     | 7.05E-01 | NS | 5.49E-01 | NS | 4.35E-03 | -1.4 |
| A_64_P142615  | XM_002724960 | 364144 | RGD1311309 | similar to 2510002A14Rik protein                                                                                | 1.42E-01 | NS | 8.15E-01 | NS | 4.93E-02 | -1.4 |
| A_44_P990065  | NM_001047869 | 299012 | Arhgap5    | Rho GTPase activating protein 5                                                                                 | 3.25E-01 | NS | 1.07E-01 | NS | 6.72E-03 | -1.4 |
| A_64_P087390  | NM_001108764 | 363070 | RGD1310727 | LOC363070                                                                                                       | 7.85E-01 | NS | 3.99E-01 | NS | 1.04E-02 | -1.4 |
| A_64_P156597  | XM_001057158 | 499803 | RGD1560831 | similar to 40S ribosomal protein S3                                                                             | 2.55E-01 | NS | 1.73E-01 | NS | 2.97E-02 | -1.4 |
| A_64_P153234  | NM_053476    | 85238  | Synj1      | synaptojanin 1                                                                                                  | 2.14E-01 | NS | 5.93E-01 | NS | 8.83E-03 | -1.4 |
| A_64_P395054  | FM128932     |        |            |                                                                                                                 | 4.44E-01 | NS | 5.00E-01 | NS | 4.18E-02 | -1.4 |
| A_44_P465998  | NM_001000303 | 295746 | Olr476     | olfactory receptor 476                                                                                          | 3.97E-01 | NS | 9.05E-01 | NS | 3.80E-02 | -1.4 |
| A_64_P057441  | NM_001009239 | 140654 | Rps3       | ribosomal protein S3                                                                                            | 2.29E-01 | NS | 6.71E-02 | NS | 3.50E-02 | -1.4 |
| A_64_P069394  | NM_001037788 | 360792 | Stylx1     | serine/threonine/tyrosine interacting-like 1                                                                    | 3.64E-01 | NS | 8.80E-01 | NS | 3.01E-02 | -1.4 |
| A_42_P663350  | NM_001033682 | 287479 | Shpk       | sedoheptulokinase                                                                                               | 1.70E-01 | NS | 9.78E-01 | NS | 2.35E-02 | -1.4 |
| A_64_P102894  | NM_001034995 | 619577 | Rnf14      | ring finger protein 14                                                                                          | 5.34E-01 | NS | 9.35E-01 | NS | 1.44E-02 | -1.4 |
| A_64_P098076  | FQ228533     |        |            |                                                                                                                 | 9.75E-02 | NS | 7.04E-01 | NS | 1.78E-02 | -1.4 |
| A_64_P081597  | NM_053620    | 113960 | Cdc42bbp   | CDC42 binding protein kinase beta (DMPK-like)                                                                   | 1.32E-01 | NS | 7.59E-01 | NS | 9.86E-03 | -1.4 |
| A_64_P116132  | NM_001011893 | 287606 | 4-Sep      | septin 4                                                                                                        | 5.06E-02 | NS | 2.26E-01 | NS | 1.73E-02 | -1.4 |
| A_64_P019325  | NM_001014024 | 309000 | Orai3      | ORAI calcium release-activated calcium modulator 3                                                              | 3.83E-01 | NS | 6.80E-01 | NS | 1.68E-02 | -1.4 |
| A_44_P448740  | NM_012616    | 24612  | Omp        | olfactory marker protein                                                                                        | 7.25E-01 | NS | 5.58E-01 | NS | 1.11E-02 | -1.4 |
| A_44_P189859  | NM_001012094 | 311872 | Zbtb43     | zinc finger and BTB domain containing 43                                                                        | 4.38E-01 | NS | 8.43E-01 | NS | 4.30E-02 | -1.4 |
| A_44_P326176  | NM_001134538 | 304554 | Sez6l      | seizure related 6 homolog (mouse)-like par-3 partitioning defective 3 homolog B (C. elegans)                    | 5.72E-01 | NS | 1.75E-01 | NS | 4.06E-02 | -1.4 |
| A_64_P151012  | XM_001066763 | 301455 | Pard3b     |                                                                                                                 | 7.73E-02 | NS | 7.26E-01 | NS | 3.39E-02 | -1.4 |
| A_64_P046788  | XM_344780    | 365018 | Zcchc14    | zinc finger, CCHC domain containing 14                                                                          | 3.45E-01 | NS | 4.36E-01 | NS | 3.38E-02 | -1.4 |
| A_44_P1029357 | XM_217657    | 307992 | Atrnl1     | attractin like 1                                                                                                | 2.87E-01 | NS | 5.03E-01 | NS | 3.18E-02 | -1.4 |
| A_64_P055748  | NM_001030034 | 303008 | Rhbdfl     | rhomoid 5 homolog 1 (Drosophila)                                                                                | 5.58E-01 | NS | 7.28E-01 | NS | 2.32E-02 | -1.4 |
| A_64_P127953  | XM_002727019 |        |            |                                                                                                                 | 5.15E-02 | NS | 9.52E-01 | NS | 1.32E-02 | -1.4 |
| A_64_P145253  | NM_017206    | 29464  | Slc6a6     | solute carrier family 6 (neurotransmitter transporter, taurine), member 6                                       | 3.20E-01 | NS | 1.16E-01 | NS | 1.52E-02 | -1.4 |
| A_64_P043926  |              | 691616 | LOC691616  | similar to keratin associated protein 5-1 biregional cell adhesion molecule-related/down-regulated by oncogenes | 1.07E-01 | NS | 2.89E-01 | NS | 4.85E-02 | -1.4 |
| A_44_P392004  | NM_001108317 | 360715 | Boc        | (Cdon) binding protein                                                                                          | 8.09E-01 | NS | 1.26E-01 | NS | 2.28E-02 | -1.4 |
| A_64_P025823  | NM_001009490 | 494199 | Oas1f      | 2'-5' oligoadenylate synthetase 1F                                                                              | 5.20E-01 | NS | 1.27E-01 | NS | 8.66E-03 | -1.4 |
| A_44_P224547  | NM_001077641 | 24654  | Plcb1      | phospholipase C, beta 1 (phosphoinositide-specific)                                                             | 2.28E-01 | NS | 5.58E-01 | NS | 4.05E-02 | -1.4 |
| A_64_P073550  | NM_001101828 | 499558 | 11-Mar     | membrane-associated ring finger (C3HC4) 11                                                                      | 2.32E-01 | NS | 7.59E-01 | NS | 4.68E-02 | -1.4 |
| A_44_P548581  | NM_001012137 | 317385 | Fus        | fusion (involved in t(12;16) in malignant liposarcoma) (human)                                                  | 5.58E-01 | NS | 2.38E-01 | NS | 1.85E-02 | -1.4 |
| A_44_P183160  | XM_001068573 | 366996 | Hoxc11     | homeobox C11                                                                                                    | 1.77E-01 | NS | 6.41E-01 | NS | 4.36E-02 | -1.4 |
| A_44_P230712  | NM_013135    | 25676  | Rasa1      | RAS p21 protein activator (GTPase activating protein) 1                                                         | 5.95E-02 | NS | 2.22E-01 | NS | 5.59E-03 | -1.4 |
| A_64_P145162  | XM_577708    |        |            |                                                                                                                 | 5.22E-01 | NS | 3.01E-01 | NS | 3.00E-02 | -1.4 |
| A_64_P040230  | NM_138978    | 192649 | Prokr2     | prokineticin receptor 2                                                                                         | 3.29E-01 | NS | 5.78E-01 | NS | 3.23E-02 | -1.4 |
| A_64_P019160  | NM_001107894 | 312828 | Etnk1      | ethanolamine kinase 1                                                                                           | 4.86E-01 | NS | 9.88E-01 | NS | 2.49E-02 | -1.4 |
| A_64_P102503  | XM_001076231 | 295475 | Neurog2    | neurogenin 2                                                                                                    | 6.93E-01 | NS | 2.89E-01 | NS | 4.73E-02 | -1.4 |
| A_64_P093483  | NM_020091    | 56825  | Cym        | chymosin                                                                                                        | 9.97E-02 | NS | 3.26E-01 | NS | 2.89E-02 | -1.4 |
| A_64_P369461  | NM_012984    | 25486  | Myo9b      | myosin IXb                                                                                                      | 9.85E-01 | NS | 7.33E-01 | NS | 3.69E-02 | -1.4 |
| A_64_P138489  | NM_001106986 | 302976 | Noxo1      | NADPH oxidase organizer 1                                                                                       | 2.56E-01 | NS | 7.56E-01 | NS | 1.77E-02 | -1.4 |

|               |              |        |            |                                                                                                                                |          |    |          |    |          |      |
|---------------|--------------|--------|------------|--------------------------------------------------------------------------------------------------------------------------------|----------|----|----------|----|----------|------|
| A_44_P1060382 | NM_172040    | 64468  | Hyal2      | hyaluronoglucosaminidase 2                                                                                                     | 1.07E-01 | NS | 1.98E-01 | NS | 5.47E-03 | -1.4 |
| A_64_P131931  | XM_001069525 |        |            |                                                                                                                                | 1.82E-01 | NS | 9.11E-01 | NS | 1.46E-02 | -1.4 |
| A_64_P354762  | NM_001108029 | 314205 | Arid4a     | AT rich interactive domain 4A (Rbp1 like)                                                                                      | 2.15E-01 | NS | 2.36E-01 | NS | 2.41E-02 | -1.4 |
| A_64_P062658  | XM_001060307 |        |            |                                                                                                                                | 1.12E-01 | NS | 1.18E-01 | NS | 1.91E-02 | -1.4 |
| A_44_P127958  | NM_134335    | 171296 | Myo9a      | myosin IXA                                                                                                                     | 1.70E-01 | NS | 5.54E-02 | NS | 3.40E-02 | -1.4 |
| A_64_P072748  | NM_001012052 | 306872 | Cage1      | cancer antigen 1                                                                                                               | 2.85E-01 | NS | 9.02E-01 | NS | 2.63E-02 | -1.4 |
| A_44_P149608  | XM_001066436 | 683538 | LOC683538  | similar to metaxin 3<br>gamma-aminobutyric acid (GABA) A<br>receptor, delta                                                    | 6.27E-01 | NS | 6.92E-01 | NS | 1.45E-02 | -1.4 |
| A_43_P11897   | NM_017289    | 29689  | Gabrd      |                                                                                                                                | 2.12E-01 | NS | 8.86E-01 | NS | 3.58E-02 | -1.4 |
| A_64_P032232  | XM_001075273 |        |            |                                                                                                                                | 1.61E-01 | NS | 6.75E-01 | NS | 2.30E-02 | -1.4 |
| A_43_P10011   | NM_001025274 | 297942 | Sfrs18     | splicing factor, arginine/serine-rich 18<br>actin related protein 2/3 complex, subunit 5-<br>like                              | 1.84E-01 | NS | 6.89E-01 | NS | 2.59E-02 | -1.4 |
| A_64_P064521  | BC098820     | 296710 | Arpc5l     | diacepam binding inhibitor (GABA receptor<br>modulator, acyl-Coenzyme A binding<br>protein)                                    | 1.38E-01 | NS | 9.55E-01 | NS | 2.59E-02 | -1.4 |
| A_43_P14621   | NM_031853    | 25045  | Dbi        |                                                                                                                                | 4.33E-01 | NS | 4.26E-01 | NS | 4.54E-02 | -1.4 |
| A_64_P088372  | NM_001077683 | 690367 | Btbd6      | BTB (POZ) domain containing 6                                                                                                  | 3.16E-01 | NS | 2.93E-01 | NS | 1.59E-02 | -1.4 |
| A_64_P101573  | NM_001037362 | 498695 | MGC125086  | similar to RIKEN cDNA 5133401N09                                                                                               | 2.79E-01 | NS | 3.57E-01 | NS | 3.84E-02 | -1.4 |
| A_64_P164632  | NM_001108474 | 361516 | Igff3      | IGF-like family member 3                                                                                                       | 5.48E-01 | NS | 1.53E-01 | NS | 3.51E-02 | -1.4 |
| A_64_P113675  | NM_001100723 | 315722 | Adpgk      | ADP-dependent glucokinase                                                                                                      | 1.02E-01 | NS | 4.72E-01 | NS | 4.80E-02 | -1.4 |
| A_43_P12535   | NM_031135    | 81813  | Klf10      | Kruppel-like factor 10                                                                                                         | 1.98E-01 | NS | 6.19E-01 | NS | 3.51E-02 | -1.4 |
| A_44_P272253  | NM_001134500 | 288978 | LOC288978  | hypothetical LOC288978                                                                                                         | 1.75E-01 | NS | 1.28E-01 | NS | 3.76E-02 | -1.4 |
| A_43_P19403   | NM_001108066 | 314616 | Arid3a     | AT rich interactive domain 3A (Bright like)                                                                                    | 9.97E-02 | NS | 2.35E-01 | NS | 1.91E-02 | -1.4 |
| A_64_P149172  | NM_001105814 | 287537 | Abr        | active BCR-related gene                                                                                                        | 3.38E-01 | NS | 7.01E-01 | NS | 7.61E-03 | -1.4 |
| A_44_P1029706 | NM_013092    | 25627  | Cma1       | chymase 1, mast cell<br>fibronectin leucine rich transmembrane<br>protein 3                                                    | 2.89E-01 | NS | 2.98E-01 | NS | 2.69E-02 | -1.4 |
| A_44_P378742  | NM_001126291 | 366205 | Flrt3      |                                                                                                                                | 8.17E-01 | NS | 7.73E-01 | NS | 3.20E-02 | -1.4 |
| A_44_P256677  | NM_001107671 | 310358 | RGD1308448 | similar to RIKEN cDNA B130016O10 gene                                                                                          | 8.96E-01 | NS | 2.16E-01 | NS | 1.33E-02 | -1.4 |
| A_44_P477971  | NM_001134570 | 360799 | RGD1560258 | similar to RIKEN cDNA 4930579G22<br>six transmembrane epithelial antigen of the<br>prostate 2                                  | 4.17E-01 | NS | 7.52E-01 | NS | 1.13E-02 | -1.4 |
| A_42_P750554  | NM_001107846 | 312052 | Steap2     |                                                                                                                                | 1.13E-01 | NS | 8.13E-02 | NS | 3.90E-02 | -1.4 |
| A_44_P234624  | NM_001107061 | 303614 | Smurf2     | SMAD specific E3 ubiquitin protein ligase 2<br>T-cell, immune regulator 1, ATPase, H+<br>transporting, lysosomal V0 subunit A3 | 2.87E-01 | NS | 5.83E-01 | NS | 6.55E-03 | -1.4 |
| A_64_P033380  | NM_199089    | 293650 | Tcigr1     |                                                                                                                                | 1.41E-01 | NS | 5.66E-01 | NS | 4.00E-02 | -1.4 |
| A_64_P100619  | NM_001000373 | 296026 | Olf773     | olfactory receptor 773                                                                                                         | 6.51E-02 | NS | 1.62E-01 | NS | 3.30E-02 | -1.4 |
| A_64_P075498  | NM_001129881 | 686999 | LOC686999  | similar to M phase phosphoprotein 6                                                                                            | 1.55E-01 | NS | 1.42E-01 | NS | 3.89E-02 | -1.4 |
| A_64_P032137  | NM_031675    | 63836  | Actn4      | actinin alpha 4                                                                                                                | 8.36E-02 | NS | 9.93E-01 | NS | 1.60E-02 | -1.4 |
| A_64_P153423  | NM_053841    | 116569 | Lct        | lactase                                                                                                                        | 7.09E-01 | NS | 3.29E-01 | NS | 2.62E-02 | -1.4 |
| A_64_P199399  | XM_577103    |        |            |                                                                                                                                | 9.82E-01 | NS | 8.25E-01 | NS | 2.48E-02 | -1.4 |
| A_64_P153477  | NM_001127522 | 287827 | Armc7      | armadillo repeat containing 7                                                                                                  | 1.79E-01 | NS | 5.17E-01 | NS | 3.85E-02 | -1.4 |
| A_43_P17196   | NM_001109283 | 500795 | RGD1562114 | RGD1562114                                                                                                                     | 9.42E-02 | NS | 3.74E-01 | NS | 4.58E-02 | -1.4 |
| A_44_P299887  | NM_001106572 | 296708 | Olfml2a    | olfactomedin-like 2A                                                                                                           | 2.29E-01 | NS | 9.51E-01 | NS | 3.67E-02 | -1.4 |
| A_64_P100833  | XM_228876    | 317423 | FAM120C    | family with sequence similarity 120C                                                                                           | 7.07E-02 | NS | 6.98E-01 | NS | 1.12E-02 | -1.4 |
| A_42_P645186  | NM_022945    | 65039  | Vegp1      | von Ebners gland protein 1                                                                                                     | 3.66E-01 | NS | 7.89E-02 | NS | 2.92E-02 | -1.4 |
| A_44_P310152  | NM_031111    | 81775  | Rps21      | ribosomal protein S21                                                                                                          | 3.43E-01 | NS | 5.16E-01 | NS | 4.85E-02 | -1.4 |
| A_64_P073078  | NM_019238    | 29580  | Fdft1      | farnesyl diphosphate farnesyl transferase 1                                                                                    | 7.42E-01 | NS | 8.75E-01 | NS | 3.85E-02 | -1.4 |
| A_64_P066711  | NM_012937    | 25422  | Crybb2     | crystallin, beta B2                                                                                                            | 3.89E-01 | NS | 5.15E-01 | NS | 2.20E-02 | -1.4 |
| A_64_P079958  | NM_001000462 | 300602 | Olf1301    | olfactory receptor 1301                                                                                                        | 5.17E-01 | NS | 1.07E-01 | NS | 4.00E-02 | -1.4 |
| A_44_P1057176 | NM_199395    | 314904 | Geft       | RhoA/RAC/CDC42 exchange factor                                                                                                 | 2.11E-01 | NS | 6.21E-01 | NS | 2.62E-02 | -1.4 |
| A_64_P111445  | XM_001057332 | 680470 | Pcdhgb6    | protocadherin gamma subfamily B, 6                                                                                             | 4.24E-01 | NS | 7.02E-01 | NS | 3.59E-02 | -1.4 |
| A_42_P833106  | NM_001134520 | 363135 | Rad54l2    | Rad54 like 2 (S. cerevisiae)                                                                                                   | 5.50E-01 | NS | 5.11E-01 | NS | 2.60E-02 | -1.4 |
| A_44_P184896  | NM_001101008 | 683722 | LOC683722  | similar to Fgfr1 oncogene partner<br>ankyrin repeat and sterile alpha motif<br>domain containing 3                             | 3.92E-01 | NS | 7.06E-01 | NS | 4.79E-02 | -1.4 |
| A_42_P590466  | NM_001009676 | 302937 | Anks3      |                                                                                                                                | 1.45E-01 | NS | 4.60E-01 | NS | 4.32E-02 | -1.4 |
| A_42_P754654  | XM_575704    | 500351 | RGD1562378 | histone H4 variant H4-v.1                                                                                                      | 1.51E-01 | NS | 9.46E-01 | NS | 1.18E-02 | -1.4 |
| A_64_P017478  | NM_001007689 | 307649 | Ciapin1    | cytokine induced apoptosis inhibitor 1                                                                                         | 6.34E-01 | NS | 9.48E-01 | NS | 4.93E-02 | -1.4 |
| A_42_P830301  | NM_001105668 | 362325 | Mdfic      | MyoD family inhibitor domain containing                                                                                        | 1.48E-01 | NS | 6.43E-01 | NS | 1.35E-02 | -1.4 |
| A_64_P101296  | XM_001056119 | 680207 | LOC680207  | hypothetical protein LOC680207                                                                                                 | 7.83E-02 | NS | 4.79E-01 | NS | 1.09E-02 | -1.4 |

|              |              |        |            |                                                                                                                                                                 |          |    |          |    |          |      |
|--------------|--------------|--------|------------|-----------------------------------------------------------------------------------------------------------------------------------------------------------------|----------|----|----------|----|----------|------|
| A_44_P371339 | NM_012589    | 24498  | Il6        | interleukin 6                                                                                                                                                   | 5.80E-01 | NS | 2.05E-01 | NS | 3.23E-02 | -1.4 |
| A_64_P062269 | XM_001067531 | 688592 | LOC688592  | similar to serine/threonine kinase                                                                                                                              | 4.49E-01 | NS | 2.19E-01 | NS | 3.32E-02 | -1.4 |
| A_44_P389670 | XR_085968    |        |            |                                                                                                                                                                 | 7.78E-02 | NS | 5.70E-01 | NS | 2.47E-02 | -1.4 |
| A_64_P072247 | XM_001055615 | 680085 | A26c2      | ANKRD26-like family C, member 2                                                                                                                                 | 6.98E-01 | NS | 1.90E-01 | NS | 1.27E-02 | -1.4 |
| A_64_P153489 | NM_001009455 | 361653 | Armc5      | armadillo repeat containing 5                                                                                                                                   | 6.22E-02 | NS | 9.96E-02 | NS | 4.64E-02 | -1.4 |
| A_42_P726743 | NM_001108985 | 366698 | Adck1      | aarF domain containing kinase 1                                                                                                                                 | 5.46E-02 | NS | 6.07E-01 | NS | 1.58E-02 | -1.4 |
| A_64_P042742 | XM_001061779 | 684984 | Cd300lg    | Cd300 molecule-like family member G<br>ST3 beta-galactoside alpha-2,3-<br>sialyltransferase 4                                                                   | 8.76E-01 | NS | 2.68E-01 | NS | 9.75E-03 | -1.4 |
| A_42_P740939 | NM_203337    | 363040 | St3gal4    | malignant fibrous histiocytoma amplified<br>sequence 1                                                                                                          | 3.12E-01 | NS | 4.30E-01 | NS | 9.43E-03 | -1.4 |
| A_44_P283790 | NM_001107316 | 306508 | Mfhas1     | UPF2 regulator of nonsense transcripts<br>homolog (yeast)                                                                                                       | 2.74E-01 | NS | 1.02E-01 | NS | 3.21E-02 | -1.4 |
| A_42_P586681 | NM_001108421 | 361271 | Upf2       | similar to Interferon-alpha/beta receptor<br>beta chain precursor (IFN-alpha-REC)<br>(Type I interferon receptor) (IFN-R)<br>(Interferon alpha/beta receptor-2) | 6.34E-01 | NS | 3.04E-01 | NS | 1.77E-02 | -1.4 |
| A_42_P519138 | XM_001073550 | 686326 | LOC686326  |                                                                                                                                                                 | 7.09E-01 | NS | 6.16E-01 | NS | 2.84E-02 | -1.4 |
| A_64_P160195 | XM_344914    | 686118 | Zfp29      | zinc finger protein 29                                                                                                                                          | 4.86E-01 | NS | 7.31E-01 | NS | 3.06E-02 | -1.4 |
| A_64_P138534 | XM_001053578 | 679580 | LOC679580  | similar to MIC2 like 1                                                                                                                                          | 4.30E-01 | NS | 1.88E-01 | NS | 3.98E-02 | -1.4 |
| A_44_P437848 | XM_001068090 | 317423 | FAM120C    | family with sequence similarity 120C                                                                                                                            | 1.49E-01 | NS | 2.35E-01 | NS | 1.39E-02 | -1.4 |
| A_44_P197663 | XM_001058060 |        |            |                                                                                                                                                                 | 3.49E-01 | NS | 6.62E-02 | NS | 2.55E-02 | -1.4 |
| A_64_P049885 | NM_053597    | 94266  | Rps27      | ribosomal protein S27<br>cyclin D binding myb-like transcription<br>factor 1                                                                                    | 2.09E-01 | NS | 5.07E-01 | NS | 4.83E-02 | -1.4 |
| A_64_P213481 | NM_053693    | 114485 | Dmtf1      | transmembrane protein 81                                                                                                                                        | 1.47E-01 | NS | 4.07E-01 | NS | 3.10E-02 | -1.4 |
| A_43_P18640  | NM_001017490 | 498229 | Tmem81     | topoisomerase (DNA) I                                                                                                                                           | 4.55E-01 | NS | 1.66E-01 | NS | 3.36E-02 | -1.4 |
| A_44_P241862 | NM_022615    | 64550  | Top1       | myosin IE                                                                                                                                                       | 2.91E-01 | NS | 9.39E-01 | NS | 3.12E-02 | -1.4 |
| A_64_P016813 | NM_173101    | 25484  | Myo1e      | lysine (K)-specific demethylase 4A<br>similar to ErbB2 interacting protein isoform<br>2                                                                         | 5.72E-01 | NS | 1.65E-01 | NS | 4.97E-02 | -1.4 |
| A_44_P199368 | NM_001107966 | 313539 | Kdm4a      |                                                                                                                                                                 | 9.00E-01 | NS | 9.71E-01 | NS | 1.27E-02 | -1.4 |
| A_42_P512385 | XR_085744    | 365661 | RGD1562952 |                                                                                                                                                                 | 2.70E-01 | NS | 7.72E-01 | NS | 2.84E-02 | -1.4 |
| A_64_P120065 | NM_001107670 | 310352 | Phf17      | PHD finger protein 17                                                                                                                                           | 1.46E-01 | NS | 5.47E-01 | NS | 1.20E-02 | -1.4 |
| A_44_P245433 | NM_001000200 | 293367 | Olr221     | olfactory receptor 221                                                                                                                                          | 4.05E-01 | NS | 4.76E-01 | NS | 4.11E-02 | -1.4 |
| A_64_P061938 | XR_006599    |        |            |                                                                                                                                                                 | 1.82E-01 | NS | 8.30E-01 | NS | 1.80E-02 | -1.4 |
| A_64_P138971 | NM_001106413 | 294770 | Card6      | caspase recruitment domain family,<br>member 6                                                                                                                  | 7.68E-01 | NS | 7.92E-01 | NS | 3.29E-02 | -1.4 |
| A_64_P016583 | NM_001108895 | 364973 | Best2      | bestrophin 2                                                                                                                                                    | 6.60E-01 | NS | 3.22E-01 | NS | 1.39E-02 | -1.4 |
| A_64_P316430 | NM_031018    | 81647  | Atf2       | activating transcription factor 2                                                                                                                               | 1.61E-01 | NS | 9.31E-01 | NS | 2.98E-02 | -1.4 |
| A_64_P260129 | NM_134332    | 171290 | Gzmc       | granzyme C                                                                                                                                                      | 1.10E-01 | NS | 3.06E-01 | NS | 3.38E-02 | -1.4 |
| A_64_P112909 | XM_001071564 |        |            |                                                                                                                                                                 | 2.38E-01 | NS | 7.24E-01 | NS | 8.77E-03 | -1.4 |
| A_64_P048987 | NM_001105828 | 287608 | Supt4h1    | suppressor of Ty 4 homolog 1 (S.<br>cerevisiae)                                                                                                                 | 7.00E-02 | NS | 4.69E-01 | NS | 3.73E-02 | -1.4 |
| A_44_P940501 | XR_009495    |        |            |                                                                                                                                                                 | 1.58E-01 | NS | 8.54E-01 | NS | 3.99E-02 | -1.4 |
| A_64_P153779 | NM_001134887 | 691922 | Nt5dc3     | 5'-nucleotidase domain containing 3                                                                                                                             | 3.01E-01 | NS | 8.70E-01 | NS | 1.11E-02 | -1.4 |
| A_64_P109373 | NM_001130536 | 282581 | Fzd6       | frizzled homolog 6 (Drosophila)                                                                                                                                 | 3.30E-01 | NS | 5.34E-01 | NS | 4.09E-02 | -1.4 |
| A_64_P015631 | NM_001107356 | 306994 | RGD1306613 | similar to RIKEN cDNA 1600012F09                                                                                                                                | 5.86E-01 | NS | 2.39E-01 | NS | 2.96E-02 | -1.4 |
| A_64_P058859 | NM_012676    | 24837  | Tnnt2      | troponin T type 2 (cardiac)<br>host cell factor C1 regulator 1 (XPO1-<br>dependent)                                                                             | 9.02E-01 | NS | 7.29E-01 | NS | 2.90E-02 | -1.4 |
| A_44_P161159 | NM_001185047 | 287097 | Hcfc1r1    |                                                                                                                                                                 | 1.42E-01 | NS | 7.04E-01 | NS | 2.39E-02 | -1.4 |
| A_64_P024287 | XR_009241    | 363913 | LOC363913  | similar to frizzled 10<br>transient receptor potential cation channel,<br>subfamily M, member 5                                                                 | 2.10E-01 | NS | 3.02E-01 | NS | 1.61E-02 | -1.4 |
| A_64_P041541 | XM_001065110 | 365391 | Trpm5      |                                                                                                                                                                 | 3.21E-01 | NS | 5.60E-01 | NS | 3.86E-02 | -1.4 |
| A_44_P741723 | NM_145789    | 252963 | Il13ra1    | interleukin 13 receptor, alpha 1                                                                                                                                | 1.31E-01 | NS | 6.94E-01 | NS | 3.49E-02 | -1.4 |
| A_64_P111604 | NM_022706    | 64670  | Gabarapl2  | GABA(A) receptor-associated protein like 2                                                                                                                      | 1.35E-01 | NS | 2.92E-01 | NS | 2.65E-02 | -1.4 |
| A_64_P062725 | XM_342217    |        |            |                                                                                                                                                                 | 3.30E-01 | NS | 9.72E-01 | NS | 3.23E-02 | -1.4 |
| A_43_P12821  | NM_053482    | 85244  | Spa17      | sperm autoantigenic protein 17<br>microtubule associated monooxygenase,<br>calponin and LIM domain containing 2                                                 | 2.75E-01 | NS | 7.22E-01 | NS | 3.44E-02 | -1.4 |
| A_64_P004428 | NM_001139508 | 365352 | Mical2     |                                                                                                                                                                 | 1.86E-01 | NS | 9.42E-01 | NS | 2.57E-02 | -1.4 |



|               |              |        |            |                                                                                                      |          |    |          |    |          |      |
|---------------|--------------|--------|------------|------------------------------------------------------------------------------------------------------|----------|----|----------|----|----------|------|
| A_44_P730251  | NM_001127544 | 310791 | Slc25a24   | solute carrier family 25 (mitochondrial carrier, phosphate carrier), member 24                       | 2.53E-01 | NS | 8.02E-01 | NS | 4.47E-02 | -1.4 |
| A_44_P557474  | NM_053742    | 114561 | Pitpnb     | phosphatidylinositol transfer protein, beta                                                          | 8.16E-02 | NS | 3.43E-01 | NS | 1.12E-02 | -1.4 |
| A_64_P117914  | NM_001110492 | 500030 | Phf14      | PHD finger protein 14                                                                                | 9.71E-01 | NS | 3.41E-01 | NS | 2.57E-02 | -1.4 |
| A_43_P17022   | NM_001109122 | 498840 | RGD1562552 | similar to hypothetical protein LOC340061                                                            | 7.03E-02 | NS | 9.59E-02 | NS | 3.16E-02 | -1.4 |
| A_64_P168845  | XM_002726559 |        |            |                                                                                                      | 4.90E-01 | NS | 9.95E-02 | NS | 2.23E-02 | -1.3 |
| A_43_P14874   | NM_024149    | 79117  | Arf5       | ADP-ribosylation factor 5                                                                            | 1.10E-01 | NS | 9.26E-01 | NS | 1.33E-02 | -1.3 |
| A_64_P312191  | XM_001078700 |        |            |                                                                                                      | 4.57E-01 | NS | 8.13E-01 | NS | 4.72E-02 | -1.3 |
| A_43_P13090   | NM_080888    | 140923 | Bnip3l     | BCL2/adenovirus E1B interacting protein 3-like                                                       | 1.76E-01 | NS | 5.33E-01 | NS | 2.45E-02 | -1.3 |
| A_64_P044806  | XM_001060537 |        |            |                                                                                                      | 8.70E-02 | NS | 4.76E-01 | NS | 1.70E-02 | -1.3 |
| A_42_P707099  | XM_231287    | 311968 | Mll5       | myeloid/lymphoid or mixed-lineage leukemia 5 (trithorax homolog, Drosophila)                         | 2.09E-01 | NS | 7.72E-01 | NS | 1.35E-02 | -1.3 |
| A_64_P072548  | NM_001134409 | 171149 | Serpini2   | serine (or cysteine) peptidase inhibitor, clade I, member 2                                          | 5.73E-01 | NS | 1.25E-01 | NS | 4.88E-02 | -1.3 |
| A_64_P065160  | NM_022711    | 64677  | Srd5a2     | steroid-5-alpha-reductase, alpha polypeptide 2 (3-oxo-5 alpha-steroid delta 4-dehydrogenase alpha 2) | 3.40E-01 | NS | 2.11E-01 | NS | 4.39E-02 | -1.3 |
| A_42_P526728  | XM_235942    | 315484 | Bbs9       | Bardet-Biedl syndrome 9                                                                              | 9.27E-02 | NS | 9.16E-01 | NS | 4.85E-02 | -1.3 |
| A_64_P102739  | XM_001074151 | 690340 | LOC690340  | similar to spermatogenesis associated glutamate (E)-rich protein 4d                                  | 1.20E-01 | NS | 5.68E-01 | NS | 2.89E-02 | -1.3 |
| A_64_P004348  | NM_022500    | 29292  | Ftl        | ferritin, light polypeptide                                                                          | 5.48E-02 | NS | 2.94E-01 | NS | 2.45E-02 | -1.3 |
| A_43_P17761   | NM_001109094 | 498420 | Etaa1      | Ewing tumor-associated antigen 1                                                                     | 1.85E-01 | NS | 5.36E-01 | NS | 4.81E-02 | -1.3 |
| A_44_P216143  | NM_001024269 | 360503 | Luc7l      | LUC7-like (S. cerevisiae)                                                                            | 1.14E-01 | NS | 7.95E-01 | NS | 1.55E-02 | -1.3 |
| A_44_P098767  | NM_001047954 | 500028 | LOC500028  | hypothetical protein LOC500028                                                                       | 2.64E-01 | NS | 2.50E-01 | NS | 1.31E-02 | -1.3 |
| A_64_P033435  | XM_575805    |        |            |                                                                                                      | 3.31E-01 | NS | 5.95E-01 | NS | 4.02E-02 | -1.3 |
| A_44_P475932  | NM_001037496 | 363452 | Otud5      | OTU domain containing 5                                                                              | 5.67E-01 | NS | 7.30E-01 | NS | 3.32E-02 | -1.3 |
| A_64_P081421  | NM_001108367 | 360993 | Smek2      | SMEK homolog 2, suppressor of mek1 (Dictyostelium)                                                   | 7.74E-02 | NS | 6.83E-01 | NS | 1.28E-02 | -1.3 |
| A_42_P470966  | BE098737     |        |            |                                                                                                      | 4.91E-01 | NS | 2.71E-01 | NS | 3.43E-02 | -1.3 |
| A_44_P410670  | NM_001108069 | 314621 | Stk11      | serine/threonine kinase 11                                                                           | 9.75E-02 | NS | 8.87E-01 | NS | 4.31E-02 | -1.3 |
| A_64_P039853  | NM_001025657 | 298681 | Ssu72      | SSU72 RNA polymerase II CTD phosphatase homolog (S. cerevisiae)                                      | 1.82E-01 | NS | 7.70E-02 | NS | 4.98E-02 | -1.3 |
| A_44_P1013485 | NM_001024875 | 298712 | RGD1307254 | similar to RIKEN cDNA 1200011118                                                                     | 2.28E-01 | NS | 8.18E-02 | NS | 4.58E-02 | -1.3 |
| A_64_P112599  | NM_133421    | 170946 | Lkap       | limkain b1                                                                                           | 1.29E-01 | NS | 4.59E-01 | NS | 2.60E-02 | -1.3 |
| A_43_P10233   | NM_001106563 | 296603 | Vav2       | vav 2 guanine nucleotide exchange factor                                                             | 6.44E-01 | NS | 2.85E-01 | NS | 3.61E-02 | -1.3 |
| A_44_P432910  | NM_012814    | 25282  | Cox6a1     | cytochrome c oxidase, subunit VIa, polypeptide 1                                                     | 3.58E-01 | NS | 7.55E-01 | NS | 4.70E-02 | -1.3 |
| A_43_P11344   | NM_001106031 | 290029 | Np         | nucleoside phosphorylase                                                                             | 1.87E-01 | NS | 7.01E-01 | NS | 2.03E-02 | -1.3 |
| A_64_P046998  | NM_021264    | 57809  | Rpl35a     | ribosomal protein L35a                                                                               | 2.32E-01 | NS | 8.17E-01 | NS | 3.37E-02 | -1.3 |
| A_64_P281643  | XM_001056606 |        |            |                                                                                                      | 9.59E-01 | NS | 6.58E-01 | NS | 3.56E-02 | -1.3 |
| A_64_P042219  | NM_021659    | 59267  | Syt7       | synaptotagmin VII                                                                                    | 9.27E-01 | NS | 6.72E-01 | NS | 3.89E-02 | -1.3 |
| A_64_P152149  | NM_001006998 | 309147 | Aldh3b1    | aldehyde dehydrogenase 3 family, member B1                                                           | 2.26E-01 | NS | 5.70E-01 | NS | 1.88E-02 | -1.3 |
| A_44_P637897  | XM_001064606 | 685634 | LOC685634  | hypothetical protein LOC685634                                                                       | 6.18E-02 | NS | 5.44E-01 | NS | 1.33E-02 | -1.3 |
| A_64_P052166  | XM_238213    | 679148 | LOC679148  | similar to delangin isoform A                                                                        | 5.43E-02 | NS | 4.06E-01 | NS | 1.44E-02 | -1.3 |
| A_64_P342349  | XM_002727514 |        |            |                                                                                                      | 1.36E-01 | NS | 9.13E-01 | NS | 4.36E-02 | -1.3 |
| A_64_P063726  | NM_001108095 | 314843 | Ptprb      | protein tyrosine phosphatase, receptor type, B                                                       | 3.19E-01 | NS | 9.00E-01 | NS | 4.16E-02 | -1.3 |
| A_64_P124973  | NM_001037441 | 29683  | Klrc1      | killer cell lectin-like receptor subfamily C, member 1                                               | 6.12E-01 | NS | 1.04E-01 | NS | 4.29E-02 | -1.3 |
| A_64_P084901  | NM_031819    | 83720  | Fat1       | FAT tumor suppressor homolog 1 (Drosophila)                                                          | 2.01E-01 | NS | 2.91E-01 | NS | 4.04E-02 | -1.3 |
| A_42_P802358  | NM_001024341 | 500400 | Fam110b    | family with sequence similarity 110, member B                                                        | 1.62E-01 | NS | 5.35E-01 | NS | 2.13E-02 | -1.3 |
| A_64_P108039  | XM_001065029 |        |            |                                                                                                      | 3.34E-01 | NS | 2.90E-01 | NS | 4.04E-02 | -1.3 |
| A_64_P118753  | NM_053662    | 114121 | Ccn1       | cyclin L1                                                                                            | 1.54E-01 | NS | 2.32E-01 | NS | 3.86E-02 | -1.3 |
| A_64_P071500  | NM_001009511 | 494230 | V1r1l      | vomer nasal 1 receptor, L1                                                                           | 8.86E-01 | NS | 8.91E-01 | NS | 2.67E-02 | -1.3 |

|               |               |           |              |                                                                                       |          |    |          |    |          |      |
|---------------|---------------|-----------|--------------|---------------------------------------------------------------------------------------|----------|----|----------|----|----------|------|
| A_44_P391537  | XM_001059198  | 680856    | LOC680856    | similar to NEDD4-binding protein 1 (N4BP1)                                            | 6.83E-01 | NS | 8.86E-01 | NS | 1.98E-02 | -1.3 |
| A_64_P066483  | NM_001100974  | 307398    | RGD1560471   | similar to hypothetical protein 4933429F08                                            | 3.53E-01 | NS | 7.96E-01 | NS | 4.17E-02 | -1.3 |
| A_64_P078538  | XM_001061006  | 297113    | Gars         | glycyl-tRNA synthetase                                                                | 1.05E-01 | NS | 1.62E-01 | NS | 2.30E-02 | -1.3 |
| A_44_P822616  | XM_576312     | 170915    | Ep300        | E1A binding protein p300                                                              | 2.14E-01 | NS | 3.95E-01 | NS | 3.47E-02 | -1.3 |
| A_44_P473754  | NM_001170328  | 304092    | Son          | Son DNA binding protein                                                               | 2.73E-01 | NS | 6.34E-01 | NS | 2.85E-02 | -1.3 |
| A_64_P091882  | XM_002728984  |           |              |                                                                                       | 3.55E-01 | NS | 4.05E-01 | NS | 4.21E-02 | -1.3 |
| A_64_P038567  | XM_001064216  | 362376    | Herc6        | hect domain and RLD 6                                                                 | 1.85E-01 | NS | 7.07E-01 | NS | 2.83E-02 | -1.3 |
| A_64_P105565  | NM_001106081  | 678743    | Tll1         | tolloid-like 1                                                                        | 3.95E-01 | NS | 9.22E-01 | NS | 2.73E-02 | -1.3 |
|               |               |           |              | golgi-specific brefeldin A resistant guanine nucleotide exchange factor 1             | 1.13E-01 | NS | 6.93E-01 | NS | 2.03E-02 | -1.3 |
| A_64_P134250  | XM_001066196  | 309451    | Gbf1         | von Willebrand factor C and EGF domains                                               | 9.64E-01 | NS | 1.71E-01 | NS | 1.48E-02 | -1.3 |
| A_64_P053822  | XM_001074809  | 309209    | Vwce         | dispatched homolog 1 (Drosophila)                                                     | 1.34E-01 | NS | 1.68E-01 | NS | 3.35E-02 | -1.3 |
| A_64_P002949  | NM_001105983  | 289338    | Disp1        | anaphase promoting complex subunit 13                                                 | 1.14E-01 | NS | 6.37E-02 | NS | 3.77E-02 | -1.3 |
| A_64_P067242  | NM_001173983  | 685029    | Anapc13      | Ras and Rab interactor 2                                                              | 2.10E-01 | NS | 6.60E-01 | NS | 1.12E-02 | -1.3 |
| A_44_P680341  | NM_001107786  | 311494    | Rin2         | zinc metalloproteinase, STE24 homolog (S. cerevisiae)                                 | 6.12E-01 | NS | 3.90E-01 | NS | 3.38E-02 | -1.3 |
| A_64_P047562  | NM_001107974  | 313564    | Zmpste24     | 92Aa-Protein                                                                          | 1.12E-01 | NS | 8.83E-01 | NS | 1.46E-02 | -1.3 |
| A_64_P109925  | NM_001009974  | 494529    | LOC494529    | protein tyrosine phosphatase, receptor type, R                                        | 9.38E-02 | NS | 7.95E-02 | NS | 2.02E-02 | -1.3 |
| A_43_P15228   | NM_053594     | 94202     | Ptprr        | golgi reassembly stacking protein 1                                                   | 6.93E-02 | NS | 5.51E-01 | NS | 3.07E-02 | -1.3 |
| A_64_P147973  | NM_019385     | 56082     | Gorasp1      | coiled-coil domain containing 110                                                     | 4.36E-01 | NS | 2.30E-01 | NS | 4.69E-02 | -1.3 |
| A_42_P841285  | XM_214351     | 290755    | Ccdc110      | ribosomal protein L32                                                                 | 3.13E-01 | NS | 7.83E-01 | NS | 4.06E-02 | -1.3 |
| A_64_P084747  | NM_013226     | 28298     | Rpl32        | GATA binding protein 2                                                                | 3.86E-01 | NS | 4.51E-01 | NS | 2.11E-02 | -1.3 |
| A_44_P403866  | NM_033442     | 25159     | Gata2        | Btf3l4 protein-like                                                                   | 2.99E-01 | NS | 7.10E-01 | NS | 4.45E-02 | -1.3 |
| A_64_P047083  | XM_002726573  | 100364057 | LOC100364057 |                                                                                       |          |    |          |    |          |      |
| A_64_P119715  | NM_001004222  | 293344    | Arfp2        | ADP-ribosylation factor interacting protein 2                                         | 1.16E-01 | NS | 1.82E-01 | NS | 4.30E-02 | -1.3 |
| A_42_P560894  | NM_019138     | 25429     | Cyp7b1       | cytochrome P450, family 7, subfamily b, polypeptide 1                                 | 4.76E-01 | NS | 1.77E-01 | NS | 2.00E-02 | -1.3 |
| A_42_P513025  | XM_343394     |           |              |                                                                                       | 5.58E-01 | NS | 4.99E-01 | NS | 4.50E-02 | -1.3 |
| A_44_P538725  | FQ225576      | 361449    | Ppil4        | peptidylprolyl isomerase (cyclophilin)-like 4                                         | 6.82E-02 | NS | 6.60E-01 | NS | 4.49E-02 | -1.3 |
| A_42_P590239  | NM_001015027  | 362453    | Crebl2       | cAMP responsive element binding protein-like 2                                        | 2.16E-01 | NS | 4.60E-01 | NS | 4.98E-02 | -1.3 |
| A_64_P075484  | XM_001078520  | 289633    | RGD1563065   | similar to 3110047P20Rik protein                                                      | 6.99E-01 | NS | 7.54E-01 | NS | 4.64E-02 | -1.3 |
| A_44_P944998  | NM_001168661  | 690344    | LOC690344    | similar to Protein UNQ655/PRO1286                                                     | 1.67E-01 | NS | 9.15E-01 | NS | 2.81E-02 | -1.3 |
|               |               |           |              | homolog precursor                                                                     |          |    |          |    |          |      |
|               |               |           |              | diazepam binding inhibitor (GABA receptor modulator, acyl-Coenzyme A binding protein) | 9.94E-02 | NS | 7.51E-01 | NS | 2.97E-02 | -1.3 |
| A_64_P022674  | AY383701      | 25045     | Dbi          | similar to Spetex-2C protein                                                          | 3.97E-01 | NS | 1.71E-01 | NS | 3.41E-02 | -1.3 |
| A_64_P098354  | XM_001066867  | 688421    | LOC688421    | mesoderm induction early response 1                                                   |          |    |          |    |          |      |
| A_64_P372717  | NM_0011131012 | 313418    | Mier1        | homolog (Xenopus laevis)                                                              | 7.19E-02 | NS | 7.57E-01 | NS | 4.98E-02 | -1.3 |
|               |               |           |              | ADP-ribosylation factor GTPase activating protein 1                                   | 4.63E-01 | NS | 1.71E-01 | NS | 3.98E-02 | -1.3 |
| A_64_P010224  | NM_145090     | 246310    | Arfgap1      | lysine-rich coiled-coil 1                                                             | 8.43E-01 | NS | 6.48E-01 | NS | 2.00E-02 | -1.3 |
| A_44_P296631  | NM_001009413  | 312437    | Krcc1        | glutathione S-transferase kappa 1                                                     | 7.78E-02 | NS | 4.00E-01 | NS | 2.97E-02 | -1.3 |
| A_44_P369808  | NM_181371     | 297029    | Gstk1        | adaptor-related protein complex 1                                                     |          |    |          |    |          |      |
|               |               |           |              | associated regulatory protein                                                         | 4.46E-01 | NS | 8.44E-01 | NS | 3.95E-02 | -1.3 |
| A_44_P123908  | XM_001076285  | 362037    | Ap1ar        | homeo box B4                                                                          | 1.44E-01 | NS | 5.42E-01 | NS | 1.87E-02 | -1.3 |
| A_64_P080439  | NM_001100787  | 497988    | Hoxb4        | presenilin 1                                                                          | 6.87E-01 | NS | 6.60E-01 | NS | 3.56E-02 | -1.3 |
| A_64_P044315  | NM_019163     | 29192     | Psen1        | similar to Ski protein                                                                | 2.75E-01 | NS | 4.92E-01 | NS | 4.91E-02 | -1.3 |
| A_44_P1031479 | XM_001077382  | 313757    | RGD1565591   | zinc finger homeobox 3                                                                | 1.13E-01 | NS | 1.69E-01 | NS | 3.85E-02 | -1.3 |
| A_42_P782490  | XM_226464     | 307829    | Zfx3         |                                                                                       | 5.66E-01 | NS | 8.16E-01 | NS | 4.10E-02 | -1.3 |
| A_64_P100013  | XM_002724884  |           |              |                                                                                       | 2.40E-01 | NS | 8.71E-02 | NS | 2.37E-02 | -1.3 |
| A_64_P015881  | NM_001134687  | 362883    | Slc35e3      | solute carrier family 35, member E3                                                   | 2.12E-01 | NS | 5.65E-01 | NS | 1.56E-02 | -1.3 |
| A_43_P10512   | NM_001108887  | 364835    | Sft2d3       | SFT2 domain containing 3                                                              | 2.12E-01 | NS | 5.65E-01 | NS | 1.56E-02 | -1.3 |
| A_64_P035192  | NM_001170348  | 314473    | Kif26a       | kinesin family member 26A                                                             | 1.66E-01 | NS | 9.08E-01 | NS | 1.99E-02 | -1.3 |
| A_64_P091464  | NM_001014220  | 363269    | Sp100        | SP100 nuclear antigen                                                                 | 1.77E-01 | NS | 7.51E-01 | NS | 4.25E-02 | -1.3 |
| A_64_P161517  | XM_002727181  | 685082    | Zfp318       | zinc finger protein 318                                                               | 9.63E-02 | NS | 6.51E-01 | NS | 2.05E-02 | -1.3 |
| A_64_P130583  | NM_001004282  | 362691    | Tmem178      | transmembrane protein 178                                                             | 1.17E-01 | NS | 2.76E-01 | NS | 4.95E-02 | -1.3 |

|               |              |           |              |                                                                                                           |          |    |          |    |          |      |
|---------------|--------------|-----------|--------------|-----------------------------------------------------------------------------------------------------------|----------|----|----------|----|----------|------|
| A_64_P037691  | NM_001000864 | 405158    | Olr1179      | olfactory receptor 1179                                                                                   | 7.09E-01 | NS | 8.44E-01 | NS | 3.13E-02 | -1.3 |
| A_44_P1053032 | XM_001067775 | 364983    | Rnf150       | ring finger protein 150                                                                                   | 5.95E-01 | NS | 4.53E-01 | NS | 3.84E-02 | -1.3 |
| A_64_P038323  | NM_133602    | 171137    | Khsrp        | KH-type splicing regulatory protein                                                                       | 9.67E-01 | NS | 6.12E-01 | NS | 4.83E-02 | -1.3 |
| A_42_P528580  | NM_001107528 | 308758    | Hddc3        | HD domain containing 3                                                                                    | 1.61E-01 | NS | 6.35E-01 | NS | 2.59E-02 | -1.3 |
| A_42_P468231  | NM_001024982 | 297516    | Cpne9        | copine family member IX<br>dolichyl-phosphate mannosyltransferase                                         | 1.72E-01 | NS | 9.91E-01 | NS | 3.14E-02 | -1.3 |
| A_64_P014192  | NM_001109331 | 502017    | Dpm3         | polypeptide 3                                                                                             | 1.57E-01 | NS | 1.63E-01 | NS | 2.37E-02 | -1.3 |
| A_43_P13971   | NM_031986    | 83841     | Sdcbp        | syndecan binding protein                                                                                  | 1.23E-01 | NS | 2.75E-01 | NS | 1.43E-02 | -1.3 |
| A_44_P1047108 | NM_024131    | 29318     | Ddt          | D-dopachrome tautomerase<br>related RAS viral (r-ras) oncogene homolog 2                                  | 1.88E-01 | NS | 2.68E-01 | NS | 3.03E-02 | -1.3 |
| A_44_P108086  | NM_001013434 | 365355    | Rras2        |                                                                                                           | 4.70E-01 | NS | 1.36E-01 | NS | 2.12E-02 | -1.3 |
| A_44_P1046816 | NM_031656    | 59074     | Stx8         | syntaxin 8                                                                                                | 8.00E-02 | NS | 5.20E-01 | NS | 2.81E-02 | -1.3 |
| A_64_P155454  | XR_085746    | 100363969 | LOC100363969 | zinc finger protein 457-like                                                                              | 4.41E-01 | NS | 4.66E-01 | NS | 2.42E-02 | -1.3 |
| A_64_P082964  | NM_001106191 | 292064    | Banp         | Btg3 associated nuclear protein                                                                           | 1.40E-01 | NS | 5.08E-01 | NS | 2.56E-02 | -1.3 |
| A_44_P236306  | NM_001100679 | 304495    | Kdm2b        | lysine (K)-specific demethylase 2B<br>mitochondrial carrier homolog 1 (C. elegans)                        | 6.21E-01 | NS | 3.64E-01 | NS | 4.16E-02 | -1.3 |
| A_64_P149225  | NM_001100833 | 294313    | Mtch1        |                                                                                                           | 9.89E-02 | NS | 6.62E-01 | NS | 4.32E-02 | -1.3 |
| A_44_P1013113 | XM_001058020 | 298247    | Mysm1        | myb-like, SWIRM and MPN domains 1                                                                         | 4.04E-01 | NS | 7.39E-01 | NS | 3.91E-02 | -1.3 |
| A_64_P008453  | XM_001064240 | 688463    | LOC688463    | hypothetical protein LOC688463                                                                            | 2.32E-01 | NS | 9.49E-01 | NS | 4.79E-02 | -1.3 |
| A_64_P052422  | XM_001071098 | 500572    | Otud3        | OTU domain containing 3                                                                                   | 3.00E-01 | NS | 9.91E-02 | NS | 4.47E-02 | -1.3 |
| A_64_P028627  | XR_007603    |           |              |                                                                                                           | 4.97E-01 | NS | 5.56E-01 | NS | 3.34E-02 | -1.3 |
| A_64_P019087  | XM_001075890 | 315112    | Foxred2      | FAD-dependent oxidoreductase domain containing 2<br>NADH dehydrogenase (ubiquinone) 1 alpha subcomplex, 1 | 6.81E-01 | NS | 3.96E-01 | NS | 4.33E-02 | -1.3 |
| A_64_P140592  | NM_001108813 | 363441    | Ndufa1       |                                                                                                           | 1.89E-01 | NS | 2.04E-01 | NS | 2.87E-02 | -1.3 |
| A_64_P041601  | NM_001106502 | 296121    | Usp8         | ubiquitin specific peptidase 8                                                                            | 1.10E-01 | NS | 3.04E-01 | NS | 2.18E-02 | -1.3 |
| A_42_P464378  | NM_017351    | 50693     | Itih3        | inter-alpha trypsin inhibitor, heavy chain 3<br>protein tyrosine phosphatase domain containing 1          | 1.01E-01 | NS | 5.99E-01 | NS | 3.58E-02 | -1.3 |
| A_44_P538970  | NM_001106104 | 291022    | Ptpdc1       | elongation of very long chain fatty acids (FEN1/Elo2, SUR4/Elo3, yeast)-like 1                            | 1.09E-01 | NS | 3.74E-01 | NS | 4.99E-02 | -1.3 |
| A_64_P146619  | NM_001044275 | 679532    | Elov1        |                                                                                                           | 2.41E-01 | NS | 3.04E-01 | NS | 4.49E-02 | -1.3 |
| A_64_P006728  | NM_001108905 | 365179    | Znf524       | zinc finger protein 524                                                                                   | 1.70E-01 | NS | 4.70E-01 | NS | 3.53E-02 | -1.3 |
| A_64_P012661  | U41183       |           |              |                                                                                                           | 5.65E-02 | NS | 1.78E-01 | NS | 3.41E-02 | -1.3 |
| A_64_P101130  | NM_013165    | 25706     | Cckbr        | cholecystokinin B receptor<br>tensin like C1 domain containing                                            | 6.59E-01 | NS | 2.15E-01 | NS | 4.75E-02 | -1.3 |
| A_64_P030474  | NM_001108114 | 315326    | Tenc1        | phosphatase (tensin 2)<br>similar to chromosome 7 open reading frame 30                                   | 2.75E-01 | NS | 7.95E-01 | NS | 1.21E-02 | -1.3 |
| A_42_P628764  | NM_001106593 | 297082    | RGD1306936   |                                                                                                           | 2.44E-01 | NS | 7.08E-01 | NS | 3.79E-02 | -1.3 |
| A_64_P088136  | EU295527     |           |              |                                                                                                           | 6.82E-01 | NS | 7.62E-01 | NS | 4.58E-02 | -1.3 |
| A_42_P711589  | NM_022948    | 65042     | Sfxn3        | sideroflexin 3                                                                                            | 4.50E-01 | NS | 3.74E-01 | NS | 3.71E-02 | -1.3 |
| A_43_P10076   | NM_031665    | 60562     | Stx6         | syntaxin 6<br>nuclear receptor subfamily 2, group F, member 6                                             | 1.01E-01 | NS | 7.50E-01 | NS | 2.93E-02 | -1.3 |
| A_64_P138659  | NM_139113    | 245980    | Nr2f6        |                                                                                                           | 5.15E-02 | NS | 6.66E-01 | NS | 3.56E-02 | -1.3 |
| A_44_P874109  | AI013853     |           |              |                                                                                                           | 1.52E-01 | NS | 8.16E-01 | NS | 3.06E-02 | -1.3 |
| A_64_P009843  | NM_172036    | 58974     | Gabarap      | GABA(A) receptor-associated protein                                                                       | 5.90E-02 | NS | 2.24E-01 | NS | 4.84E-02 | -1.3 |
| A_64_P142320  | NM_001142962 | 499563    | Zfp458       | zinc finger protein 458                                                                                   | 1.39E-01 | NS | 6.37E-01 | NS | 4.47E-02 | -1.3 |
| A_44_P379891  | NM_001025672 | 305910    | Pspc1        | paraspeckle component 1                                                                                   | 6.12E-01 | NS | 7.08E-01 | NS | 4.51E-02 | -1.3 |
| A_64_P068062  | NM_199412    | 365567    | Cbara1       | calcium binding atopy-related autoantigen 1<br>acyl-Coenzyme A binding domain containing 5                | 1.21E-01 | NS | 5.65E-01 | NS | 1.70E-02 | -1.3 |
| A_43_P18918   | NM_001077635 | 307170    | Acbd5        |                                                                                                           | 3.87E-01 | NS | 3.76E-01 | NS | 4.98E-02 | -1.3 |
| A_64_P129965  | NM_001000118 | 293083    | Olr20        | olfactory receptor 20<br>nicotinate phosphoribosyltransferase domain containing 1                         | 3.01E-01 | NS | 9.32E-02 | NS | 4.61E-02 | -1.3 |
| A_44_P1049252 | NM_207609    | 315085    | Naprt1       | STAR-related lipid transfer (START) domain containing 3                                                   | 5.13E-02 | NS | 3.80E-01 | NS | 2.95E-02 | -1.3 |
| A_44_P419168  | NM_001014229 | 363675    | Stard3       |                                                                                                           | 2.94E-01 | NS | 4.69E-01 | NS | 2.99E-02 | -1.3 |
| A_43_P11432   | NM_012489    | 24157     | Acaa1        | acetyl-Coenzyme A acyltransferase 1                                                                       | 2.89E-01 | NS | 9.41E-01 | NS | 4.06E-02 | -1.3 |
| A_44_P1018997 | NM_001009631 | 289196    | Tmco1        | transmembrane and coiled-coil domains 1                                                                   | 1.10E-01 | NS | 3.22E-01 | NS | 4.90E-02 | -1.3 |

|               |              |           |              |                                                                                                                                          |          |    |          |    |          |      |
|---------------|--------------|-----------|--------------|------------------------------------------------------------------------------------------------------------------------------------------|----------|----|----------|----|----------|------|
| A_44_P354573  | NM_001025419 | 360564    | Tax1bp3      | Tax1 (human T-cell leukemia virus type I) binding protein 3                                                                              | 3.27E-01 | NS | 9.27E-01 | NS | 2.28E-02 | -1.3 |
| A_64_P164876  |              | 25254     | Dspp         | dentin sialophosphoprotein                                                                                                               | 6.51E-01 | NS | 4.36E-01 | NS | 4.93E-02 | -1.3 |
| A_64_P122429  | NM_021264    | 57809     | Rpl35a       | ribosomal protein L35a                                                                                                                   | 3.03E-01 | NS | 9.99E-01 | NS | 4.92E-02 | -1.3 |
| A_44_P1057074 | NM_001127535 | 303617    | Falz         | fetal Alzheimer antigen                                                                                                                  | 9.56E-02 | NS | 5.12E-02 | NS | 4.41E-02 | -1.3 |
| A_44_P428651  | NM_001106549 | 296456    | Itgav        | integrin, alpha V                                                                                                                        | 7.96E-01 | NS | 5.09E-01 | NS | 3.34E-02 | -1.3 |
| A_64_P322881  | NM_133397    | 170909    | Erg          | v-ets erythroblastosis virus E26 oncogene homolog (avian)                                                                                | 5.54E-02 | NS | 2.26E-01 | NS | 4.44E-02 | -1.3 |
| A_64_P023255  | NM_022384    | 64186     | Ascl1        | achaete-scute complex homolog 1 (Drosophila)                                                                                             | 1.68E-01 | NS | 6.46E-01 | NS | 2.83E-02 | -1.3 |
| A_64_P099269  | NM_001135260 | 499690    | Tmem167b     | transmembrane protein 167B                                                                                                               | 1.21E-01 | NS | 3.35E-01 | NS | 4.41E-02 | -1.3 |
| A_43_P15602   | NM_134391    | 171412    | Defb22       | defensin beta 22                                                                                                                         | 6.51E-02 | NS | 5.79E-01 | NS | 2.39E-02 | -1.3 |
| A_43_P15261   | NM_013131    | 25672     | Nr3c2        | nuclear receptor subfamily 3, group C, member 2                                                                                          | 2.58E-01 | NS | 8.71E-01 | NS | 4.57E-02 | -1.3 |
| A_44_P156521  | NM_001025135 | 497995    | Krtap1-5     | keratin associated protein 1-5                                                                                                           | 4.61E-01 | NS | 4.92E-01 | NS | 3.01E-02 | -1.3 |
| A_42_P529690  | NM_001173510 | 312192    | Ahcy12       | adenosylhomocysteinase-like 2                                                                                                            | 1.18E-01 | NS | 5.07E-01 | NS | 1.50E-02 | -1.3 |
| A_44_P1018684 | NM_001170601 | 498351    | Srp72        | signal recognition particle 72                                                                                                           | 6.57E-02 | NS | 7.74E-01 | NS | 2.51E-02 | -1.3 |
| A_44_P653818  | NM_001122677 | 304695    | Zochc2       | zinc finger, CCHC domain containing 2 similar to dimerization cofactor of hepatocyte nuclear factor 1 (HNF1) from muscle                 | 3.94E-01 | NS | 9.31E-01 | NS | 3.81E-02 | -1.3 |
| A_64_P054743  | XM_002725231 | 685729    | LOC685729    | muscle                                                                                                                                   | 3.37E-01 | NS | 5.16E-01 | NS | 3.95E-02 | -1.3 |
| A_42_P672217  | NM_138508    | 25541     | Scp2         | sterol carrier protein 2                                                                                                                 | 1.89E-01 | NS | 4.45E-01 | NS | 2.95E-02 | -1.3 |
| A_64_P081292  | NM_212542    | 294207    | Ppp1r11      | protein phosphatase 1, regulatory (inhibitor) subunit 11                                                                                 | 1.29E-01 | NS | 8.48E-02 | NS | 4.90E-02 | -1.3 |
| A_44_P975945  | NM_001108494 | 361614    | Fam168a      | family with sequence similarity 168, member A                                                                                            | 1.40E-01 | NS | 2.64E-01 | NS | 3.33E-02 | -1.3 |
| A_64_P016484  | NM_001106886 | 301230    | RGD1565959   | RGD1565959                                                                                                                               | 4.11E-01 | NS | 3.63E-01 | NS | 3.01E-02 | -1.3 |
| A_64_P103493  | BC168677     |           |              |                                                                                                                                          | 6.71E-01 | NS | 9.03E-01 | NS | 2.58E-02 | -1.3 |
| A_44_P757980  | NM_001033069 | 361845    | Eif4ebp2     | eukaryotic translation initiation factor 4E binding protein 2                                                                            | 8.18E-01 | NS | 1.24E-01 | NS | 3.15E-02 | -1.3 |
| A_64_P126939  | NM_001107982 | 313598    | Zmym4        | zinc finger, MYM-type 4                                                                                                                  | 4.61E-01 | NS | 7.51E-01 | NS | 3.45E-02 | -1.3 |
| A_64_P104348  | NM_053689    | 114300    | Gtppb4       | GTP binding protein 4                                                                                                                    | 8.62E-02 | NS | 9.87E-01 | NS | 2.40E-02 | -1.3 |
| A_64_P077089  | NM_172017    | 171441    | Yif1         | Yip1 interacting factor homolog (S. cerevisiae)                                                                                          | 8.96E-02 | NS | 4.58E-01 | NS | 3.45E-02 | -1.3 |
| A_43_P16717   | XM_001053609 | 306998    | Cdc215       | cell division cycle 2-like 5 (cholinesterase-related cell division controller)                                                           | 2.49E-01 | NS | 6.31E-01 | NS | 2.81E-02 | -1.3 |
| A_42_P786203  | XM_218939    | 308839    | Rsf1         | remodeling and spacing factor 1                                                                                                          | 3.71E-01 | NS | 6.02E-01 | NS | 3.95E-02 | -1.3 |
| A_44_P518176  | XM_001060245 | 291034    | Ccdc90a      | coiled-coil domain containing 90A                                                                                                        | 9.44E-01 | NS | 7.49E-01 | NS | 4.00E-02 | -1.3 |
| A_64_P042027  | XM_001055923 | 502118    | RGD1565598   | similar to serine/threonine kinase                                                                                                       | 2.04E-01 | NS | 9.36E-01 | NS | 3.72E-02 | -1.3 |
| A_64_P119675  | NM_138875    | 24518     | Jund         | jun D proto-oncogene                                                                                                                     | 3.35E-01 | NS | 3.24E-01 | NS | 4.08E-02 | -1.3 |
| A_64_P101013  | AY325145     |           |              |                                                                                                                                          | 8.69E-02 | NS | 7.00E-02 | NS | 1.69E-02 | -1.3 |
| A_64_P126335  | NM_001109105 | 498559    | Commd6       | COMM domain containing 6                                                                                                                 | 1.88E-01 | NS | 6.91E-01 | NS | 4.88E-02 | -1.3 |
| A_64_P047367  | NM_017050    | 24786     | Sod1         | superoxide dismutase 1, soluble                                                                                                          | 6.42E-02 | NS | 4.36E-01 | NS | 4.45E-02 | -1.3 |
| A_64_P024853  | NM_001109875 | 301468    | Crygb        | crystallin, gamma B                                                                                                                      | 3.75E-01 | NS | 7.63E-01 | NS | 3.20E-02 | -1.3 |
| A_44_P224631  | NM_053626    | 114027    | Dao          | D-amino-acid oxidase                                                                                                                     | 8.88E-02 | NS | 2.88E-01 | NS | 4.08E-02 | -1.3 |
| A_64_P035832  | XM_001057248 |           |              |                                                                                                                                          | 1.84E-01 | NS | 7.09E-01 | NS | 4.94E-02 | -1.3 |
| A_64_P021367  | NM_001100560 | 304157    | Nrip1        | nuclear receptor interacting protein 1                                                                                                   | 2.32E-01 | NS | 6.52E-01 | NS | 1.58E-02 | -1.3 |
| A_64_P054276  | NM_001108381 | 361054    | Ebpl         | emopamil binding protein-like                                                                                                            | 6.61E-02 | NS | 9.59E-01 | NS | 4.56E-02 | -1.3 |
| A_64_P080747  | NM_153736    | 266782    | Prl3a1       | Prolactin family 3, subfamily a, member 1                                                                                                | 7.71E-01 | NS | 5.09E-02 | NS | 3.38E-02 | -1.3 |
| A_44_P1019654 | NM_001106910 | 301382    | Ercc5        | excision repair cross-complementing rodent repair deficiency, complementation group 5 adaptor-related protein complex 2, alpha 2 subunit | 1.68E-01 | NS | 8.71E-01 | NS | 2.87E-02 | -1.3 |
| A_64_P165361  | NM_031008    | 81637     | Ap2a2        | subunit                                                                                                                                  | 5.75E-02 | NS | 2.32E-01 | NS | 3.86E-02 | -1.3 |
| A_64_P122432  | NM_001106636 | 297890    | Bsdc1        | BSD domain containing 1                                                                                                                  | 5.03E-01 | NS | 5.39E-01 | NS | 3.72E-02 | -1.3 |
| A_64_P090244  | NM_001127449 | 287876    | Actg1        | actin, gamma 1                                                                                                                           | 1.15E-01 | NS | 7.21E-01 | NS | 3.37E-02 | -1.3 |
| A_64_P034501  | NM_001103356 | 100125364 | LOC100125364 | hypothetical protein LOC100125364                                                                                                        | 9.54E-01 | NS | 9.60E-01 | NS | 3.26E-02 | -1.3 |
| A_42_P783550  | NM_001107348 | 306873    | Rreb1        | ras responsive element binding protein 1                                                                                                 | 1.27E-01 | NS | 2.21E-01 | NS | 2.70E-02 | -1.3 |

|               |              |           |              |                                                                                                   |          |    |          |    |          |      |
|---------------|--------------|-----------|--------------|---------------------------------------------------------------------------------------------------|----------|----|----------|----|----------|------|
| A_64_P070553  | XM_001059991 | 500697    | RGD1565693   | similar to GLE1-like, RNA export mediator isoform 1                                               | 4.65E-01 | NS | 4.26E-01 | NS | 3.73E-02 | -1.3 |
| A_44_P1036534 | NM_001017377 | 302967    | Paqr4        | progesterin and adipoQ receptor family member IV                                                  | 1.57E-01 | NS | 9.68E-02 | NS | 4.20E-02 | -1.3 |
| A_44_P171440  | NM_138828    | 25728     | Apoe         | apolipoprotein E                                                                                  | 7.84E-01 | NS | 8.66E-02 | NS | 4.07E-02 | -1.3 |
| A_42_P652827  | NM_001024274 | 362129    | Gtdc1        | glycosyltransferase-like domain containing 1                                                      | 2.74E-01 | NS | 6.93E-01 | NS | 4.36E-02 | -1.3 |
| A_42_P827013  | NM_001173528 | 309678    | Trappc10     | trafficking protein particle complex 10                                                           | 1.35E-01 | NS | 3.73E-01 | NS | 4.92E-02 | -1.3 |
| A_64_P065902  | NM_001170404 | 360775    | Zfp157       | zinc finger protein 157                                                                           | 3.13E-01 | NS | 5.59E-01 | NS | 2.98E-02 | -1.3 |
| A_64_P011156  | NM_053843    | 116591    | Fcgr2a       | Fc fragment of IgG, low affinity IIa, receptor (CD32)                                             | 2.37E-01 | NS | 3.93E-01 | NS | 4.04E-02 | -1.3 |
| A_64_P110690  | NM_001108513 | 361689    | Unc93b1      | unc-93 homolog B1 (C. elegans)                                                                    | 1.28E-01 | NS | 2.15E-01 | NS | 2.64E-02 | -1.3 |
| A_64_P151989  | XM_002726646 | 100365546 | LOC100365546 | rCG30673-like                                                                                     | 1.27E-01 | NS | 6.76E-01 | NS | 4.13E-02 | -1.3 |
| A_44_P294658  | NM_024377    | 79218     | Gng5         | guanine nucleotide binding protein (G protein), gamma 5                                           | 4.34E-01 | NS | 8.92E-01 | NS | 4.95E-02 | -1.3 |
| A_64_P140174  | XM_001069011 | 498701    | RGD1566359   | similar to RIKEN cDNA B230219D22                                                                  | 3.34E-01 | NS | 8.97E-01 | NS | 4.78E-02 | -1.3 |
| A_64_P117398  | NM_001136162 | 292095    | Ttc13        | tetratricopeptide repeat domain 13                                                                | 8.72E-01 | NS | 8.79E-02 | NS | 4.17E-02 | -1.3 |
| A_64_P157723  | NM_001013045 | 288593    | Ccl24        | chemokine (C-C motif) ligand 24                                                                   | 8.08E-01 | NS | 4.44E-01 | NS | 3.77E-02 | -1.3 |
| A_44_P576351  | NM_001108342 | 360833    | Kdsr         | 3-ketodihydrosphingosine reductase                                                                | 5.12E-01 | NS | 8.59E-01 | NS | 4.09E-02 | -1.3 |
| A_64_P130628  | XR_006670    | 298138    | LOC298138    | similar to RAS and EF hand domain containing                                                      | 1.13E-01 | NS | 9.46E-01 | NS | 4.29E-02 | -1.3 |
| A_64_P153502  | NM_001109663 | 301579    | Armc9        | armadillo repeat containing 9                                                                     | 7.51E-01 | NS | 7.37E-01 | NS | 4.12E-02 | -1.3 |
| A_64_P112440  | XM_002726310 |           |              |                                                                                                   | 8.57E-01 | NS | 5.74E-01 | NS | 3.64E-02 | -1.3 |
| A_44_P1006056 | XM_001062937 |           |              |                                                                                                   | 2.85E-01 | NS | 8.81E-01 | NS | 4.03E-02 | -1.2 |
| A_64_P003679  | FQ223342     |           |              |                                                                                                   | 1.77E-01 | NS | 3.72E-01 | NS | 3.22E-02 | -1.2 |
| A_64_P104237  | NM_001108315 | 360702    | Ttc3         | tetratricopeptide repeat domain 3                                                                 | 2.60E-01 | NS | 9.60E-01 | NS | 4.53E-02 | -1.2 |
| A_64_P049432  | XM_002730083 | 100361198 | LOC100361198 | rCG43589-like                                                                                     | 1.44E-01 | NS | 4.37E-01 | NS | 3.44E-02 | -1.2 |
| A_64_P137818  | XM_001056259 | 301510    | Rufy4        | RUN and FYVE domain containing 4                                                                  | 8.21E-02 | NS | 8.22E-01 | NS | 4.01E-02 | -1.2 |
| A_44_P1046713 | NM_001108449 | 361407    | Cog4         | component of oligomeric golgi complex 4                                                           | 1.41E-01 | NS | 2.02E-01 | NS | 4.10E-02 | -1.2 |
| A_64_P126080  | NM_001008374 | 361940    | Pgrmc2       | progesterone receptor membrane component 2                                                        | 2.78E-01 | NS | 7.82E-01 | NS | 2.42E-02 | -1.2 |
| A_42_P534021  | NM_001107652 | 310097    | Snx18        | sorting nexin 18                                                                                  | 2.19E-01 | NS | 7.58E-01 | NS | 3.01E-02 | -1.2 |
| A_64_P153639  | NM_001106901 | 301345    | Cnnm3        | cyclin M3                                                                                         | 2.32E-01 | NS | 3.71E-01 | NS | 4.71E-02 | -1.2 |
| A_64_P153070  | NM_001100804 | 652929    | Cd99         | CD99 antigen                                                                                      | 3.19E-01 | NS | 2.71E-01 | NS | 4.49E-02 | -1.2 |
| A_44_P522388  | NM_017323    | 50659     | Nr2c2        | nuclear receptor subfamily 2, group C, member 2                                                   | 1.57E-01 | NS | 8.94E-01 | NS | 2.87E-02 | -1.2 |
| A_44_P281328  | NM_001012159 | 361176    | Upf3a        | UPF3 regulator of nonsense transcripts homolog A (yeast)                                          | 2.97E-01 | NS | 6.36E-01 | NS | 4.32E-02 | -1.2 |
| A_64_P059437  | XM_001060013 |           |              |                                                                                                   | 9.27E-02 | NS | 3.46E-01 | NS | 3.89E-02 | -1.2 |
| A_64_P035915  | NM_001170471 | 305955    | Zc3h13       | zinc finger CCCH type containing 13                                                               | 1.91E-01 | NS | 6.22E-01 | NS | 4.29E-02 | -1.2 |
| A_64_P064786  | XM_001063881 |           |              |                                                                                                   | 3.71E-01 | NS | 5.54E-01 | NS | 4.30E-02 | 1.2  |
| A_64_P258485  | NM_031020    | 81649     | Mapk14       | mitogen activated protein kinase 14                                                               | 4.08E-01 | NS | 9.86E-01 | NS | 4.88E-02 | 1.2  |
| A_64_P044583  | NM_031579    | 29463     | Ptp4a1       | protein tyrosine phosphatase 4a1                                                                  | 9.60E-01 | NS | 9.59E-01 | NS | 4.28E-02 | 1.2  |
| A_44_P282853  | NM_031983    | 83833     | Smarcd2      | SWI/SNF related, matrix associated, actin dependent regulator of chromatin, subfamily d, member 2 | 1.90E-01 | NS | 5.03E-01 | NS | 4.02E-02 | 1.2  |
| A_64_P119199  | XM_001057394 | 500304    | RGD1561270   | similar to Zinc finger protein 248                                                                | 2.57E-01 | NS | 8.02E-01 | NS | 3.13E-02 | 1.3  |
| A_44_P379991  | XM_212955    | 295660    | RGD1564400   | similar to Eukaryotic translation initiation factor 5 (eIF-5)                                     | 1.42E-01 | NS | 3.19E-01 | NS | 3.56E-02 | 1.3  |
| A_44_P363549  | NM_001107367 | 307148    | Nsun6        | NOL1/NOP2/Sun domain family, member 6                                                             | 7.83E-01 | NS | 2.45E-01 | NS | 4.46E-02 | 1.3  |
| A_42_P637618  | NM_001108261 | 360461    | RGD1305823   | similar to RIKEN cDNA 0610037P05                                                                  | 2.73E-01 | NS | 4.32E-01 | NS | 4.95E-02 | 1.3  |
| A_44_P277068  | XM_001064690 | 301438    | RGD1562399   | similar to 40S ribosomal protein S2                                                               | 9.58E-01 | NS | 7.19E-01 | NS | 4.58E-02 | 1.3  |
| A_64_P055843  | NM_001007632 | 294512    | Ascc1        | activating signal cointegrator 1 complex subunit 1                                                | 7.24E-01 | NS | 7.41E-01 | NS | 4.61E-02 | 1.3  |
| A_44_P452114  | NM_001109968 | 24398     | Gls          | glutaminase                                                                                       | 4.50E-01 | NS | 6.30E-01 | NS | 4.33E-02 | 1.3  |
| A_44_P456483  | NM_138866    | 192234    | Eif2b5       | eukaryotic translation initiation factor 2B, subunit 5 epsilon                                    | 5.87E-02 | NS | 9.12E-01 | NS | 2.99E-02 | 1.3  |
| A_44_P113141  | FQ227921     |           |              |                                                                                                   | 8.78E-01 | NS | 3.88E-01 | NS | 2.05E-02 | 1.3  |

|               |              |        |            |                                                                                                          |          |    |          |    |          |     |
|---------------|--------------|--------|------------|----------------------------------------------------------------------------------------------------------|----------|----|----------|----|----------|-----|
| A_44_P342451  | NM_001033063 | 291317 | Rpp38      | ribonuclease P/MRP 38 subunit (human)                                                                    | 1.58E-01 | NS | 2.71E-01 | NS | 2.82E-02 | 1.3 |
| A_64_P128180  | NM_133539    | 171061 | Mrpl17     | mitochondrial ribosomal protein L17                                                                      | 4.06E-01 | NS | 7.85E-01 | NS | 4.22E-02 | 1.3 |
| A_64_P061286  | NM_024351    | 24468  | Hspa8      | heat shock protein A8                                                                                    | 1.37E-01 | NS | 3.15E-01 | NS | 4.39E-02 | 1.3 |
| A_64_P076900  | NM_001106779 | 299730 | Nedd1      | neural precursor cell expressed, developmentally down-regulated 1                                        | 3.01E-01 | NS | 3.96E-01 | NS | 4.82E-02 | 1.3 |
| A_64_P143840  | NM_001100472 | 114839 | Ccnc       | cyclin C                                                                                                 | 3.38E-01 | NS | 9.70E-01 | NS | 4.77E-02 | 1.3 |
| A_42_P784202  | XM_220512    | 287361 | Znf496     | zinc finger protein 496                                                                                  | 9.13E-01 | NS | 1.40E-01 | NS | 3.50E-02 | 1.3 |
| A_64_P137330  | NM_001106603 | 297406 | Cct7       | chaperonin containing Tcp1, subunit 7 (eta)                                                              | 1.68E-01 | NS | 8.13E-02 | NS | 2.80E-02 | 1.3 |
| A_64_P157446  | NM_001107410 | 307645 | Gpr114     | G protein-coupled receptor 114                                                                           | 8.56E-01 | NS | 6.46E-01 | NS | 4.45E-02 | 1.3 |
| A_44_P1057763 | NM_053576    | 94167  | Prdx6      | peroxiredoxin 6                                                                                          | 2.95E-01 | NS | 6.64E-01 | NS | 4.31E-02 | 1.3 |
| A_44_P447623  | NM_031325    | 83472  | Ugdh       | UDP-glucose dehydrogenase                                                                                | 1.30E-01 | NS | 1.81E-01 | NS | 4.18E-02 | 1.3 |
| A_44_P853647  | NM_001025114 | 294568 | Wasf1      | WAS protein family, member 1                                                                             | 2.66E-01 | NS | 3.79E-01 | NS | 3.81E-02 | 1.3 |
| A_64_P114373  | NM_053885    | 116665 | Rere       | arginine-glutamic acid dipeptide (RE) repeats                                                            | 2.76E-01 | NS | 1.17E-01 | NS | 4.67E-02 | 1.3 |
| A_44_P557575  | XM_217716    |        |            |                                                                                                          | 5.56E-01 | NS | 1.96E-01 | NS | 4.18E-02 | 1.3 |
| A_64_P052464  | XM_223075    | 289382 | Ints7      | integrator complex subunit 7                                                                             | 1.44E-01 | NS | 4.48E-01 | NS | 4.19E-02 | 1.3 |
| A_64_P095900  | NM_019339    | 54292  | Rgs12      | regulator of G-protein signaling 12                                                                      | 7.38E-01 | NS | 2.67E-01 | NS | 4.31E-02 | 1.3 |
| A_64_P003286  | NM_012984    | 25486  | Myo9b      | myosin IXb                                                                                               | 2.73E-01 | NS | 5.08E-01 | NS | 3.73E-02 | 1.3 |
| A_64_P015236  | NM_001108827 | 363611 | RGD1306000 | similar to CG8043-PA zinc finger with UFM1-specific peptidase domain                                     | 9.47E-01 | NS | 1.21E-01 | NS | 4.44E-02 | 1.3 |
| A_42_P529514  | NM_001008308 | 294390 | Zufsp      | secretion regulating guanine nucleotide exchange factor                                                  | 5.52E-01 | NS | 2.49E-01 | NS | 3.13E-02 | 1.3 |
| A_44_P503699  | XM_001080802 | 365243 | Sergef     |                                                                                                          | 2.26E-01 | NS | 2.62E-01 | NS | 3.25E-02 | 1.3 |
| A_64_P021806  | NM_001015029 | 362607 | Kpna6      | karyopherin alpha 6 (importin alpha 7)                                                                   | 1.32E-01 | NS | 7.79E-01 | NS | 3.96E-02 | 1.3 |
| A_42_P612939  | NM_001107155 | 304581 | Tmem119    | transmembrane protein 119                                                                                | 1.65E-01 | NS | 1.08E-01 | NS | 4.87E-02 | 1.3 |
| A_64_P048292  | NM_001105809 | 287523 | Dph1       | DPH1 homolog (S. cerevisiae)                                                                             | 1.53E-01 | NS | 7.52E-01 | NS | 1.56E-02 | 1.3 |
| A_44_P483000  | XM_001071108 | 309673 | Rrp1b      | ribosomal RNA processing 1 homolog B (S. cerevisiae)                                                     | 9.79E-01 | NS | 8.06E-01 | NS | 4.52E-02 | 1.3 |
| A_44_P409645  | NM_001004247 | 300744 | Ubl7       | ubiquitin-like 7 (bone marrow stromal cell-derived)                                                      | 7.95E-02 | NS | 9.96E-01 | NS | 4.30E-02 | 1.3 |
| A_44_P260201  | NM_001107553 | 309002 | Znf668     | zinc finger protein 668                                                                                  | 6.16E-02 | NS | 2.52E-01 | NS | 4.35E-02 | 1.3 |
| A_44_P135896  | NM_001127659 | 299851 | Mars       | methionine-tRNA synthetase                                                                               | 1.86E-01 | NS | 1.74E-01 | NS | 4.73E-02 | 1.3 |
| A_64_P044345  | NM_022401    | 64204  | Plec       | plectin                                                                                                  | 1.36E-01 | NS | 9.54E-01 | NS | 4.85E-02 | 1.3 |
| A_42_P576454  | NM_212508    | 361791 | Nrm        | nurim (nuclear envelope membrane protein)                                                                | 9.03E-01 | NS | 9.63E-01 | NS | 2.71E-02 | 1.3 |
| A_44_P393966  | NM_001173554 | 362324 | Mios       | missing oocyte, meiosis regulator, homolog (Drosophila)                                                  | 4.01E-01 | NS | 1.42E-01 | NS | 1.87E-02 | 1.3 |
| A_44_P518259  | NM_001106184 | 291999 | Wwp2       | WW domain containing E3 ubiquitin protein ligase 2                                                       | 5.89E-01 | NS | 2.94E-01 | NS | 1.94E-02 | 1.4 |
| A_44_P208091  | NM_001009652 | 294846 | Znf622     | zinc finger protein 622                                                                                  | 9.31E-01 | NS | 1.50E-01 | NS | 4.49E-02 | 1.4 |
| A_42_P510203  | NM_001170584 | 312703 | Pex5       | peroxisomal biogenesis factor 5                                                                          | 2.31E-01 | NS | 2.95E-01 | NS | 3.74E-02 | 1.4 |
| A_64_P131086  | NM_001015012 | 308821 | Rab30      | RAB30, member RAS oncogene family                                                                        | 5.30E-01 | NS | 3.58E-01 | NS | 2.11E-02 | 1.4 |
| A_64_P100863  | NM_001107999 | 313772 | Acap3      | ArfGAP with coiled-coil, ankyrin repeat and PH domains 3                                                 | 1.52E-01 | NS | 4.73E-01 | NS | 2.39E-02 | 1.4 |
| A_44_P127802  | NM_001039455 | 361828 | Cytsa      | cytospin A                                                                                               | 8.88E-01 | NS | 6.94E-01 | NS | 1.79E-02 | 1.4 |
| A_64_P090518  | XM_236296    | 315713 | Pml        | promyelocytic leukemia                                                                                   | 7.33E-01 | NS | 9.40E-01 | NS | 4.85E-02 | 1.4 |
| A_64_P024112  | XR_005763    | 497952 | LOC497952  | similar to Ubiquitin-associated protein 2-like ubiquitin-conjugating enzyme E2, J2 (UBC6 homolog, yeast) | 7.18E-02 | NS | 2.10E-01 | NS | 2.57E-02 | 1.4 |
| A_64_P082949  | NM_001007655 | 298689 | Ube2j2     | ubiquitin-conjugating enzyme E2, J2 (UBC6 homolog, yeast)                                                | 5.73E-01 | NS | 7.76E-01 | NS | 3.22E-02 | 1.4 |
| A_64_P022447  | NM_001107775 | 311423 | Slc4a11    | solute carrier family 4, sodium bicarbonate transporter-like, member 11                                  | 6.70E-01 | NS | 5.35E-01 | NS | 4.87E-02 | 1.4 |
| A_44_P506635  | NM_001047871 | 300994 | lfrd2      | interferon-related developmental regulator 2                                                             | 1.59E-01 | NS | 6.49E-01 | NS | 3.55E-02 | 1.4 |
| A_44_P269230  | NM_001004283 | 362952 | Eif3d      | eukaryotic translation initiation factor 3, subunit D                                                    | 7.16E-01 | NS | 8.05E-01 | NS | 4.31E-02 | 1.4 |
| A_44_P332472  | NM_133535    | 171057 | Cbwd1      | COBW domain containing 1                                                                                 | 4.17E-01 | NS | 8.88E-01 | NS | 4.11E-02 | 1.4 |
| A_64_P015402  | NM_001014080 | 314432 | Uba1       | ubiquitin-like modifier activating enzyme 1                                                              | 4.06E-01 | NS | 8.66E-01 | NS | 2.56E-02 | 1.4 |

|              |              |        |            |                                                                                     |          |    |          |    |          |     |
|--------------|--------------|--------|------------|-------------------------------------------------------------------------------------|----------|----|----------|----|----------|-----|
| A_64_P139058 | NM_001106841 | 300852 | Mto1       | mitochondrial translation optimization 1 homolog ( <i>S. cerevisiae</i> )           | 5.63E-01 | NS | 8.24E-01 | NS | 4.84E-02 | 1.4 |
| A_64_P065776 | NM_001127534 | 303372 | Nle1       | notchless homolog 1 ( <i>Drosophila</i> )                                           | 8.00E-01 | NS | 3.78E-01 | NS | 3.74E-02 | 1.4 |
| A_44_P443008 | NM_001013068 | 293054 | Mrp146     | mitochondrial ribosomal protein L46                                                 | 9.96E-01 | NS | 8.30E-01 | NS | 4.38E-02 | 1.4 |
| A_42_P467956 | NM_001134514 | 295678 | Sestd1     | SEC14 and spectrin domains 1                                                        | 7.98E-01 | NS | 8.75E-02 | NS | 2.90E-02 | 1.4 |
| A_42_P665139 | NM_001107411 | 307657 | Ogfd1      | 2-oxoglutarate and iron-dependent oxygenase domain containing 1                     | 6.85E-01 | NS | 5.59E-01 | NS | 3.22E-02 | 1.4 |
| A_44_P506169 | NM_001013193 | 361655 | Tial1      | Tia1 cytotoxic granule-associated RNA binding protein-like 1                        | 6.54E-01 | NS | 6.45E-01 | NS | 2.78E-02 | 1.4 |
| A_44_P452024 | NM_198789    | 363232 | Bzw1       | basic leucine zipper and W2 domains 1                                               | 8.49E-01 | NS | 2.88E-01 | NS | 2.37E-02 | 1.4 |
| A_64_P375074 | XM_001073035 | 360524 | Zchc10     | zinc finger, CCHC domain containing 10                                              | 2.19E-01 | NS | 7.65E-01 | NS | 2.82E-02 | 1.4 |
| A_64_P024920 | XR_008672    |        |            |                                                                                     | 5.03E-01 | NS | 6.98E-01 | NS | 4.17E-02 | 1.4 |
| A_44_P294055 | NM_001014157 | 361452 | Ltv1       | LTV1 homolog ( <i>S. cerevisiae</i> )                                               | 2.33E-01 | NS | 5.44E-01 | NS | 3.78E-02 | 1.4 |
| A_64_P102430 | NM_013173    | 25715  | Slc11a2    | solute carrier family 11 (proton-coupled divalent metal ion transporters), member 2 | 4.36E-01 | NS | 4.80E-01 | NS | 2.27E-02 | 1.4 |
| A_44_P255350 | NM_001007674 | 303676 | Slc25a19   | solute carrier family 25 (mitochondrial thiamine pyrophosphate carrier), member 19  | 2.99E-01 | NS | 8.39E-01 | NS | 4.87E-02 | 1.4 |
| A_44_P457521 | XM_001056749 | 316731 | Mettl4     | methyltransferase like 4                                                            | 1.35E-01 | NS | 9.34E-01 | NS | 2.47E-02 | 1.4 |
| A_44_P547056 | NM_001015023 | 361208 | Rab24      | RAB24, member RAS oncogene family                                                   | 3.35E-01 | NS | 5.37E-01 | NS | 7.84E-03 | 1.4 |
| A_64_P119567 | NM_144738    | 246246 | Pnpla7     | patatin-like phospholipase domain containing 7                                      | 7.36E-01 | NS | 6.39E-01 | NS | 1.27E-02 | 1.4 |
| A_64_P028088 | NM_001106073 | 290647 | Lsm4       | LSM4 homolog, U6 small nuclear RNA associated ( <i>S. cerevisiae</i> )              | 1.18E-01 | NS | 1.15E-01 | NS | 4.92E-02 | 1.4 |
| A_44_P315661 | NM_013134    | 25675  | Hmgcr      | 3-hydroxy-3-methylglutaryl-Coenzyme A reductase                                     | 6.72E-01 | NS | 6.86E-01 | NS | 4.01E-02 | 1.4 |
| A_64_P006538 | XR_009637    |        |            |                                                                                     | 1.81E-01 | NS | 5.90E-01 | NS | 2.56E-02 | 1.4 |
| A_44_P974862 | NM_001126288 | 362792 | Pld4       | phospholipase D family, member 4                                                    | 9.69E-02 | NS | 2.54E-01 | NS | 3.73E-02 | 1.4 |
| A_44_P108772 | XM_233679    | 298652 | Ube4b      | ubiquitination factor E4B (UFD2 homolog, yeast)                                     | 6.55E-01 | NS | 7.74E-01 | NS | 4.48E-02 | 1.4 |
| A_64_P129063 | NM_001025725 | 361650 | Hirip3     | HIRA interacting protein 3                                                          | 1.46E-01 | NS | 5.89E-02 | NS | 2.14E-02 | 1.4 |
| A_44_P220256 | NM_001106127 | 291355 | Prtfdc1    | phosphoribosyl transferase domain containing 1                                      | 6.26E-01 | NS | 9.06E-01 | NS | 1.50E-02 | 1.4 |
| A_44_P186860 | NM_030867    | 81525  | Nfkbib     | nuclear factor of kappa light polypeptide gene enhancer in B-cells inhibitor, beta  | 1.79E-01 | NS | 4.10E-01 | NS | 2.29E-02 | 1.4 |
| A_43_P18690  | NM_001083624 | 305343 | Pds5a      | PDS5, regulator of cohesion maintenance, homolog A ( <i>S. cerevisiae</i> )         | 2.47E-01 | NS | 5.38E-01 | NS | 1.78E-02 | 1.4 |
| A_43_P21913  | NM_001106468 | 295425 | Usp53      | ubiquitin specific peptidase 53                                                     | 4.55E-01 | NS | 9.34E-01 | NS | 4.01E-02 | 1.4 |
| A_44_P134865 | NM_001134556 | 313056 | Snmp40     | small nuclear ribonucleoprotein 40 (U5)                                             | 1.74E-01 | NS | 5.88E-01 | NS | 4.00E-02 | 1.4 |
| A_44_P352344 | NM_021757    | 60376  | Plrg1      | pleiotropic regulator 1, PRL1 homolog ( <i>Arabidopsis</i> )                        | 5.88E-01 | NS | 1.52E-01 | NS | 3.24E-02 | 1.4 |
| A_64_P022620 | XM_240367    | 306366 | RGD1563825 | similar to ENSANGP00000020885                                                       | 8.07E-01 | NS | 7.41E-01 | NS | 3.54E-02 | 1.4 |
| A_64_P131618 | NM_001107229 | 305464 | Depdc5     | DEP domain containing 5                                                             | 1.65E-01 | NS | 3.82E-01 | NS | 3.04E-02 | 1.4 |
| A_43_P15271  | NM_017201    | 29443  | Ahcy       | adenosylhomocysteinase                                                              | 2.57E-01 | NS | 4.62E-01 | NS | 2.44E-02 | 1.4 |
| A_43_P17260  | NM_001014172 | 361956 | Rsrc1      | arginine/serine-rich coiled-coil 1                                                  | 5.56E-01 | NS | 8.88E-01 | NS | 4.38E-02 | 1.4 |
| A_44_P249925 | BC084702     |        |            |                                                                                     | 3.17E-01 | NS | 3.87E-01 | NS | 3.97E-02 | 1.4 |
| A_64_P057725 | NM_001039014 | 301081 | Zdhhc3     | zinc finger, DHHC-type containing 3                                                 | 8.16E-01 | NS | 2.68E-01 | NS | 3.44E-02 | 1.4 |
| A_44_P181464 | NM_001025027 | 363442 | Fundc1     | FUN14 domain containing 1                                                           | 5.37E-01 | NS | 9.75E-01 | NS | 4.16E-02 | 1.4 |
| A_64_P033994 | NM_001039539 | 362741 | Pax9       | paired box 9                                                                        | 6.39E-01 | NS | 8.23E-01 | NS | 1.95E-02 | 1.4 |
| A_64_P157005 | NM_001008301 | 291796 | Usp14      | ubiquitin specific peptidase 14                                                     | 7.08E-01 | NS | 8.23E-01 | NS | 2.60E-02 | 1.4 |
| A_44_P417104 | NM_001108387 | 361071 | Sucla2     | succinate-CoA ligase, ADP-forming, beta subunit                                     | 5.34E-01 | NS | 7.05E-01 | NS | 3.53E-02 | 1.4 |
| A_42_P794130 | NM_171993    | 64515  | Cdc20      | cell division cycle 20 homolog ( <i>S. cerevisiae</i> )                             | 1.94E-01 | NS | 2.62E-01 | NS | 3.69E-02 | 1.4 |
| A_44_P214873 | NM_024362    | 29657  | Arntl      | aryl hydrocarbon receptor nuclear translocator-like                                 | 5.91E-02 | NS | 5.85E-01 | NS | 4.57E-02 | 1.4 |
| A_64_P073824 | XM_219774    |        |            |                                                                                     | 1.67E-01 | NS | 4.92E-01 | NS | 4.70E-02 | 1.4 |
| A_42_P533865 | NM_001127650 | 687561 | Anks4b     | ankyrin repeat and sterile alpha motif domain containing 4B                         | 7.93E-01 | NS | 8.82E-01 | NS | 3.18E-02 | 1.4 |

|               |              |           |              |                                                                                                                  |          |    |          |    |          |     |
|---------------|--------------|-----------|--------------|------------------------------------------------------------------------------------------------------------------|----------|----|----------|----|----------|-----|
| A_44_P650944  | NM_001126374 | 367838    | Zc4h2        | zinc finger, C4H2 domain containing NADH dehydrogenase (ubiquinone) Fe-S protein 8                               | 4.42E-01 | NS | 7.61E-01 | NS | 4.71E-02 | 1.4 |
| A_44_P132522  | NM_001106322 | 293652    | Ndufs8       |                                                                                                                  | 2.60E-01 | NS | 8.87E-01 | NS | 4.15E-02 | 1.4 |
| A_64_P094000  | NM_001077648 | 313678    | Prdm2        | PR domain containing 2, with ZNF domain                                                                          | 2.16E-01 | NS | 8.91E-01 | NS | 4.52E-02 | 1.4 |
| A_44_P246381  | NM_001107080 | 303794    | Dgcr6        | DiGeorge syndrome critical region gene 6 general transcription factor IIH, polypeptide 1                         | 5.21E-02 | NS | 9.86E-01 | NS | 4.36E-02 | 1.4 |
| A_44_P461085  | NM_001108485 | 361580    | Gtf2h1       |                                                                                                                  | 5.31E-01 | NS | 5.78E-01 | NS | 3.07E-02 | 1.4 |
| A_43_P114368  | XR_007549    |           |              |                                                                                                                  | 8.54E-01 | NS | 3.73E-01 | NS | 1.22E-02 | 1.4 |
| A_44_P356605  | NM_001170590 | 296865    | Las1l        | LAS1-like (S. cerevisiae)                                                                                        | 1.78E-01 | NS | 2.91E-01 | NS | 3.21E-02 | 1.5 |
| A_44_P1017335 | NM_001108607 | 362273    | Cse1l        | CSE1 chromosome segregation 1-like (yeast) similar to 60 kDa heat shock protein, mitochondrial precursor (Hsp60) | 3.68E-01 | NS | 8.99E-01 | NS | 4.38E-02 | 1.5 |
| A_64_P021370  | XM_229115    | 302797    | RGD1563524   |                                                                                                                  | 1.78E-01 | NS | 4.84E-01 | NS | 2.53E-02 | 1.5 |
| A_44_P877059  | NM_001106537 | 296349    | Ttpal        | tocopherol (alpha) transfer protein-like                                                                         | 3.28E-01 | NS | 3.65E-01 | NS | 4.00E-02 | 1.5 |
| A_42_P528106  | XM_343404    | 363073    | Glce         | glucuronic acid epimerase                                                                                        | 4.53E-01 | NS | 3.55E-01 | NS | 9.22E-03 | 1.5 |
| A_64_P150583  | XR_085597    | 100365635 | LOC100365635 | ankyrin repeat domain 49-like                                                                                    | 9.77E-01 | NS | 7.24E-01 | NS | 7.09E-03 | 1.5 |
| A_43_P19502   | NM_001108486 | 361588    | Lrrc28       | leucine rich repeat containing 28                                                                                | 4.18E-01 | NS | 7.53E-01 | NS | 4.99E-02 | 1.5 |
| A_64_P068333  | NM_001077671 | 313587    | Zc3h12a      | zinc finger CCCH type containing 12A                                                                             | 2.60E-01 | NS | 2.29E-01 | NS | 4.64E-02 | 1.5 |
| A_64_P113404  | NM_001109532 | 689314    | Mapk11       | mitogen-activated protein kinase 11                                                                              | 8.64E-01 | NS | 5.74E-01 | NS | 3.08E-02 | 1.5 |
| A_44_P880152  | NM_031553    | 25336     | Nfyb         | nuclear transcription factor-Y beta proteasome (prosome, macropain) subunit, beta type 7                         | 9.41E-01 | NS | 9.03E-01 | NS | 4.60E-02 | 1.5 |
| A_44_P250041  | NM_053532    | 85492     | Psbm7        |                                                                                                                  | 4.99E-01 | NS | 6.55E-01 | NS | 2.31E-02 | 1.5 |
| A_44_P1047615 | NM_001127552 | 361554    | Lsm14a       | LSM14A, SCD6 homolog A (S. cerevisiae)                                                                           | 4.72E-01 | NS | 7.77E-01 | NS | 6.43E-03 | 1.5 |
| A_44_P370335  | NM_001011911 | 289707    | Lyar         | Ly1 antibody reactive homolog (mouse)                                                                            | 6.40E-01 | NS | 9.77E-01 | NS | 4.10E-02 | 1.5 |
| A_42_P522285  | NM_001044263 | 499617    | Rfxap        | regulatory factor X-associated protein                                                                           | 3.09E-01 | NS | 6.59E-01 | NS | 4.94E-02 | 1.5 |
| A_44_P478436  | XM_234348    | 299169    | RGD1562299   | similar to taube nuss ubiquitin-conjugating enzyme E2G 2 (UBC7 homolog, yeast)                                   | 4.70E-01 | NS | 7.38E-02 | NS | 2.17E-02 | 1.5 |
| A_64_P082889  | NM_001106380 | 294331    | Ube2g2       |                                                                                                                  | 4.97E-01 | NS | 7.90E-01 | NS | 4.91E-02 | 1.5 |
| A_64_P123995  | XR_008160    |           |              |                                                                                                                  | 4.81E-01 | NS | 1.95E-01 | NS | 3.49E-02 | 1.5 |
| A_43_P10744   | NM_001014212 | 363099    | Rsl24d1      | ribosomal L24 domain containing 1                                                                                | 1.83E-01 | NS | 9.44E-01 | NS | 1.67E-02 | 1.5 |
| A_44_P100980  | NM_001108213 | 316344    | Rev1         | REV1 homolog (S. cerevisiae)                                                                                     | 5.65E-01 | NS | 8.46E-01 | NS | 4.00E-02 | 1.5 |
| A_64_P081762  | NM_023027    | 65241     | Secp43       | tRNA selenocysteine associated protein                                                                           | 2.92E-01 | NS | 6.39E-01 | NS | 4.28E-02 | 1.5 |
| A_44_P419676  | NM_001127293 | 296957    | Zc3hc1       | zinc finger, C3HC-type containing 1                                                                              | 2.03E-01 | NS | 1.55E-01 | NS | 6.31E-03 | 1.5 |
| A_44_P1040999 | NM_001013108 | 300756    | Arih1        | ariadne ubiquitin-conjugating enzyme E2 binding protein homolog 1 (Drosophila)                                   | 3.27E-01 | NS | 9.52E-01 | NS | 4.54E-02 | 1.5 |
| A_44_P533943  | NM_080909    | 140945    | Rtn3         | reticulin 3                                                                                                      | 2.23E-01 | NS | 8.08E-01 | NS | 3.98E-02 | 1.5 |
| A_44_P346426  | NM_199410    | 363237    | Wdr12        | WD repeat domain 12                                                                                              | 5.67E-01 | NS | 1.08E-01 | NS | 3.43E-02 | 1.5 |
| A_44_P511359  | NM_001108736 | 362838    | Mum1         | melanoma associated antigen (mutated) 1                                                                          | 6.84E-01 | NS | 6.38E-01 | NS | 4.14E-02 | 1.5 |
| A_42_P454206  | NM_001173354 | 315949    | Armc8        | armadillo repeat containing 8                                                                                    | 7.30E-01 | NS | 4.02E-01 | NS | 2.58E-02 | 1.5 |
| A_44_P505282  | NM_012785    | 25249     | Coq7         | coenzyme Q7 homolog, ubiquinone (yeast)                                                                          | 9.97E-01 | NS | 7.42E-01 | NS | 1.15E-02 | 1.5 |
| A_44_P250267  | NM_017360    | 50998     | Coil         | coilin similar to NHP2-like protein 1 (High mobility group-like nuclear protein 2 homolog 1)                     | 8.78E-01 | NS | 8.27E-01 | NS | 4.76E-02 | 1.5 |
| A_64_P038612  | XM_001053559 | 363514    | RGD1566078   |                                                                                                                  | 7.30E-01 | NS | 1.30E-01 | NS | 1.70E-02 | 1.5 |
| A_44_P464196  | NM_001012164 | 361383    | Cd97         | (Sperm specific antigen 1) CD97 molecule                                                                         | 1.29E-01 | NS | 6.43E-01 | NS | 3.88E-02 | 1.5 |
| A_44_P777424  | XM_002724806 |           |              |                                                                                                                  | 6.10E-01 | NS | 6.18E-01 | NS | 1.45E-02 | 1.5 |
| A_44_P522682  | NM_024152    | 79121     | Arf6         | ADP-ribosylation factor 6 heat shock protein 90kDa alpha (cytosolic), class B member 1                           | 3.44E-01 | NS | 7.51E-02 | NS | 4.16E-02 | 1.5 |
| A_64_P140020  | NM_001004082 | 301252    | Hsp90ab1     | MAP kinase-interacting serine/threonine kinase 1                                                                 | 3.63E-01 | NS | 7.35E-01 | NS | 1.02E-02 | 1.5 |
| A_64_P041787  | NM_001044267 | 500526    | Mknk1        |                                                                                                                  | 6.33E-02 | NS | 2.63E-01 | NS | 3.73E-02 | 1.5 |
| A_64_P078484  | NM_001006967 | 292028    | Kars         | lysyl-tRNA synthetase coiled-coil-helix-coiled-coil-helix domain containing 3                                    | 2.90E-01 | NS | 2.91E-01 | NS | 3.78E-02 | 1.5 |
| A_64_P097769  | NM_001106588 | 296966    | Chchd3       |                                                                                                                  | 6.86E-01 | NS | 2.94E-01 | NS | 4.45E-02 | 1.5 |
| A_64_P082825  | NM_183052    | 287927    | Ube2v2       | ubiquitin-conjugating enzyme E2 variant 2                                                                        | 3.11E-01 | NS | 5.34E-01 | NS | 4.69E-02 | 1.5 |
| A_64_P083384  | NM_148891    | 259274    | Nmt1         | N-myristoyltransferase 1                                                                                         | 1.89E-01 | NS | 4.74E-01 | NS | 2.84E-02 | 1.5 |
| A_64_P062368  | NM_001079531 | 690050    | Tpmt         | thiopurine S-methyltransferase                                                                                   | 1.35E-01 | NS | 2.73E-01 | NS | 4.93E-02 | 1.5 |
| A_44_P513747  | NM_001108086 | 314764    | Eea1         | early endosome antigen 1                                                                                         | 3.18E-01 | NS | 6.73E-02 | NS | 3.13E-02 | 1.5 |



|              |              |        |            |                                                                                   |          |    |          |    |          |     |
|--------------|--------------|--------|------------|-----------------------------------------------------------------------------------|----------|----|----------|----|----------|-----|
| A_44_P293357 | NM_001014098 | 316008 | Ccdc51     | coiled-coil domain containing 51                                                  | 8.09E-01 | NS | 8.08E-01 | NS | 4.26E-02 | 1.5 |
| A_64_P019077 | NM_345868    | 84582  | Hdac7      | histone deacetylase 7                                                             | 1.82E-01 | NS | 4.55E-01 | NS | 2.14E-02 | 1.5 |
| A_64_P065882 | NM_001106224 | 292588 | Ube2s      | ubiquitin-conjugating enzyme E2S                                                  | 5.17E-01 | NS | 2.46E-01 | NS | 2.36E-02 | 1.5 |
| A_44_P146893 | NM_138911    | 192277 | Stip1      | stress-induced phosphoprotein 1                                                   | 2.08E-01 | NS | 9.96E-01 | NS | 3.90E-02 | 1.5 |
| A_43_P13337  | NM_138911    | 192277 | Stip1      | stress-induced phosphoprotein 1                                                   | 5.16E-01 | NS | 7.81E-01 | NS | 2.30E-02 | 1.5 |
| A_44_P671320 | NM_001008774 | 361230 | Tmem170b   | transmembrane protein 170B                                                        | 6.94E-01 | NS | 5.27E-02 | NS | 3.54E-02 | 1.5 |
| A_44_P405583 | NM_001100752 | 362440 | Ndufa9     | NADH dehydrogenase (ubiquinone) 1 alpha subcomplex, 9                             | 1.58E-01 | NS | 4.13E-01 | NS | 3.32E-02 | 1.5 |
| A_64_P067678 | NM_001062926 | 291133 | Aldh5a1    | aldehyde dehydrogenase 5 family, member A1                                        | 2.79E-01 | NS | 1.43E-01 | NS | 3.97E-02 | 1.5 |
| A_64_P054097 | NM_001107862 | 312373 | Nt5c3      | 5'-nucleotidase, cytosolic III                                                    | 4.31E-01 | NS | 7.83E-01 | NS | 1.86E-02 | 1.5 |
| A_44_P241018 | NM_022863    | 64831  | Ireb2      | iron responsive element binding protein 2                                         | 9.00E-01 | NS | 8.59E-01 | NS | 4.10E-02 | 1.5 |
| A_44_P581181 | NM_001106186 | 292016 | Ftsjd1     | FtsJ methyltransferase domain containing 1                                        | 5.67E-01 | NS | 1.88E-01 | NS | 4.32E-02 | 1.5 |
| A_64_P112312 | NM_031745    | 65201  | Clip1      | CAP-GLY domain containing linker protein 1                                        | 4.74E-01 | NS | 4.25E-01 | NS | 4.87E-02 | 1.5 |
| A_44_P897591 | NM_001106950 | 302495 | LOC302495  | hypothetical LOC302495                                                            | 6.71E-01 | NS | 5.44E-01 | NS | 3.27E-02 | 1.5 |
| A_44_P344346 | NM_019289    | 54227  | Arpc1b     | actin related protein 2/3 complex, subunit 1B                                     | 8.58E-01 | NS | 9.56E-01 | NS | 3.10E-02 | 1.5 |
| A_64_P009375 | NM_053707    | 114499 | Hdgf       | hepatoma-derived growth factor                                                    | 1.12E-01 | NS | 7.95E-01 | NS | 4.55E-02 | 1.5 |
| A_64_P096580 | XR_007696    |        |            |                                                                                   | 5.39E-01 | NS | 8.75E-01 | NS | 3.13E-02 | 1.5 |
| A_44_P192772 | NM_001060344 | 498297 | Cnst       | consortin, connexin sorting protein                                               | 2.05E-01 | NS | 8.17E-01 | NS | 3.15E-02 | 1.5 |
| A_43_P19988  | NM_001107978 | 313581 | RGD1559610 | similar to CGI-94 protein                                                         | 4.46E-01 | NS | 2.73E-01 | NS | 3.17E-02 | 1.5 |
| A_64_P056415 | NM_023025    | 65210  | Cyp2j4     | cytochrome P450, family 2, subfamily j, polypeptide 4                             | 6.85E-01 | NS | 1.83E-01 | NS | 4.72E-02 | 1.5 |
| A_42_P708541 | NM_001106505 | 296134 | Mrps5      | mitochondrial ribosomal protein S5                                                | 6.52E-01 | NS | 2.59E-01 | NS | 3.16E-02 | 1.5 |
| A_64_P121898 | NM_001065765 | 361492 | Pira2      | paired-Ig-like receptor A2                                                        | 7.63E-02 | NS | 1.05E-01 | NS | 4.10E-03 | 1.5 |
| A_44_P222004 | NM_013129    | 25670  | Il15       | interleukin 15                                                                    | 5.81E-01 | NS | 4.21E-01 | NS | 2.12E-02 | 1.5 |
| A_44_P358828 | NM_001055698 | 307489 | Pcdhb13    | protocadherin beta 13                                                             | 8.49E-02 | NS | 1.59E-01 | NS | 4.76E-02 | 1.5 |
| A_44_P354154 | NM_001075875 | 361409 | Rfwd3      | ring finger and WD repeat domain 3                                                | 7.17E-01 | NS | 5.65E-01 | NS | 4.52E-02 | 1.5 |
| A_44_P480636 | NM_001005895 | 690693 | Ddx19b     | DEAD (Asp-Glu-Ala-As) box polypeptide 19B                                         | 6.06E-02 | NS | 8.68E-01 | NS | 2.31E-02 | 1.5 |
| A_44_P450460 | NM_001025024 | 362914 | Wdyhv1     | WDYHV motif containing 1                                                          | 1.97E-01 | NS | 9.80E-01 | NS | 1.48E-02 | 1.5 |
| A_44_P513530 | NM_001107796 | 311598 | Fam83d     | family with sequence similarity 83, member D                                      | 1.81E-01 | NS | 3.47E-01 | NS | 1.11E-02 | 1.5 |
| A_44_P354284 | NM_001107973 | 313563 | Dem1       | defects in morphology 1 homolog (S. cerevisiae)                                   | 2.82E-01 | NS | 5.97E-01 | NS | 3.21E-02 | 1.6 |
| A_42_P800852 | NM_001134550 | 311115 | RGD1565257 | similar to zinc finger protein 650                                                | 8.98E-01 | NS | 7.82E-01 | NS | 4.01E-02 | 1.6 |
| A_64_P106598 | NM_212528    | 294279 | Col11a2    | collagen, type XI, alpha 2                                                        | 9.39E-01 | NS | 7.51E-01 | NS | 2.74E-02 | 1.6 |
| A_44_P313542 | NM_019232    | 29517  | Sgk1       | serum/glucocorticoid regulated kinase 1                                           | 7.00E-02 | NS | 5.67E-01 | NS | 1.60E-02 | 1.6 |
| A_42_P684281 | XR_008784    | 500532 | LOC500532  | hypothetical LOC500532                                                            | 7.44E-01 | NS | 5.11E-01 | NS | 4.78E-02 | 1.6 |
| A_42_P832028 | NM_001006978 | 297522 | Sec13      | SEC13 homolog (S. cerevisiae)                                                     | 1.86E-01 | NS | 1.72E-01 | NS | 3.77E-02 | 1.6 |
| A_44_P201796 | NM_001173334 | 315023 | Slc25a32   | solute carrier family 25, member 32                                               | 4.05E-01 | NS | 4.58E-01 | NS | 6.94E-03 | 1.6 |
| A_44_P550412 | NM_001056331 |        |            |                                                                                   | 7.86E-01 | NS | 8.93E-01 | NS | 1.20E-02 | 1.6 |
| A_64_P079835 | NM_001025726 | 361811 | Srpk1      | SFRS protein kinase 1                                                             | 6.69E-01 | NS | 6.80E-01 | NS | 2.12E-02 | 1.6 |
| A_42_P579376 | NM_031609    | 50594  | Nbl1       | neuroblastoma, suppression of tumorigenicity 1                                    | 1.71E-01 | NS | 1.29E-01 | NS | 3.32E-02 | 1.6 |
| A_64_P151191 | NM_001108925 | 365388 | Psmc13     | proteasome (prosome, macropain) 26S subunit, non-ATPase, 13                       | 9.70E-01 | NS | 2.45E-01 | NS | 4.51E-02 | 1.6 |
| A_64_P123307 | NM_001134957 | 362925 | Zfat       | zinc finger and AT hook domain containing processing of precursor 5, ribonuclease | 1.88E-01 | NS | 6.87E-01 | NS | 4.32E-02 | 1.6 |
| A_64_P121291 | NM_001105752 | 117241 | Pop5       | P/MRP subunit (S. cerevisiae)                                                     | 3.52E-01 | NS | 3.12E-01 | NS | 1.65E-02 | 1.6 |
| A_42_P704824 | NM_001009640 | 291987 | Cirrh1a    | cirrhosis, autosomal recessive 1A                                                 | 8.98E-01 | NS | 7.16E-01 | NS | 2.71E-02 | 1.6 |
| A_44_P225493 | NM_145184    | 171329 | Usp15      | ubiquitin specific peptidase 15                                                   | 2.61E-01 | NS | 2.14E-01 | NS | 2.84E-02 | 1.6 |
| A_44_P974651 | XR_001060786 |        |            |                                                                                   | 1.72E-01 | NS | 4.02E-01 | NS | 3.72E-02 | 1.6 |
| A_42_P839226 | NM_001106775 | 299706 | Nup37      | nucleoporin 37                                                                    | 2.98E-01 | NS | 1.90E-01 | NS | 1.45E-02 | 1.6 |
| A_42_P588041 | NM_001033681 | 287444 | Eif5a      | eukaryotic translation initiation factor 5A                                       | 3.49E-01 | NS | 5.34E-01 | NS | 4.16E-02 | 1.6 |
| A_44_P370267 | NM_001106234 | 292710 | Ethe1      | ethylmalonic encephalopathy 1                                                     | 5.45E-01 | NS | 6.96E-01 | NS | 3.23E-02 | 1.6 |
| A_44_P253324 | NM_001108014 | 313961 | Smc6       | structural maintenance of chromosomes 6                                           | 4.65E-01 | NS | 8.64E-01 | NS | 2.08E-02 | 1.6 |
| A_44_P277876 | NM_001011903 | 288617 | Tpst1      | tyrosylprotein sulfotransferase 1                                                 | 5.50E-01 | NS | 2.67E-01 | NS | 4.00E-02 | 1.6 |

|               |              |        |            |                                                                                                                           |          |    |          |    |          |     |
|---------------|--------------|--------|------------|---------------------------------------------------------------------------------------------------------------------------|----------|----|----------|----|----------|-----|
| A_44_P382423  | NM_001106666 | 298189 | Bnc2       | basonuclin 2                                                                                                              | 2.34E-01 | NS | 3.95E-01 | NS | 2.12E-02 | 1.6 |
| A_44_P285390  | NM_199386    | 299159 | Atp6v1d    | ATPase, H+ transporting, lysosomal V1 subunit D                                                                           | 1.78E-01 | NS | 1.04E-01 | NS | 4.55E-02 | 1.6 |
| A_64_P041973  | XM_221864    |        |            |                                                                                                                           | 3.96E-01 | NS | 2.58E-01 | NS | 3.41E-02 | 1.6 |
| A_64_P098319  | NM_001106706 | 298782 | Ttc27      | tetratricopeptide repeat domain 27                                                                                        | 3.05E-01 | NS | 4.69E-01 | NS | 2.02E-02 | 1.6 |
| A_64_P050851  | NM_012954    | 25446  | Fosf2      | fos-like antigen 2                                                                                                        | 1.69E-01 | NS | 4.16E-01 | NS | 4.84E-02 | 1.6 |
| A_64_P010446  | NM_001013205 | 679712 | Myef2      | myelin expression factor 2                                                                                                | 8.99E-01 | NS | 8.91E-01 | NS | 3.13E-02 | 1.6 |
| A_44_P333403  | XM_238523    |        |            |                                                                                                                           | 1.77E-01 | NS | 2.11E-01 | NS | 4.40E-02 | 1.6 |
| A_44_P309398  | NM_001077670 | 691947 | Eif3j      | eukaryotic translation initiation factor 3, subunit J                                                                     | 8.13E-01 | NS | 2.67E-01 | NS | 4.77E-02 | 1.6 |
| A_64_P142122  | XM_001074158 | 315746 | Cin6       | ceroid-lipofuscinosis, neuronal 6 transmembrane anterior posterior transformation 1                                       | 4.64E-01 | NS | 2.60E-01 | NS | 4.45E-02 | 1.6 |
| A_64_P098991  | XM_001059604 | 305386 | Tapt1      | adrenergic, beta, receptor kinase 1                                                                                       | 6.40E-01 | NS | 1.32E-01 | NS | 2.90E-02 | 1.6 |
| A_44_P491621  | NM_012776    | 25238  | Adrbk1     | zinc finger protein 423                                                                                                   | 3.97E-01 | NS | 4.78E-01 | NS | 1.16E-02 | 1.6 |
| A_44_P463831  | NM_053583    | 94188  | Zfp423     |                                                                                                                           | 5.57E-01 | NS | 8.81E-01 | NS | 1.96E-02 | 1.6 |
| A_64_P016398  | XM_226326    |        |            |                                                                                                                           | 7.02E-02 | NS | 4.54E-01 | NS | 3.43E-02 | 1.6 |
| A_64_P113875  | NM_001024292 | 499330 | LOC499330  | similar to Nicotinamide riboside kinase 1                                                                                 | 5.94E-01 | NS | 1.97E-01 | NS | 1.19E-02 | 1.6 |
| A_42_P520891  | NM_001107529 | 308761 | Prc1       | protein regulator of cytokinesis 1                                                                                        | 8.69E-02 | NS | 1.60E-01 | NS | 3.74E-02 | 1.6 |
| A_44_P259516  | M95735       | 24923  | Stx1b      | syntaxin 1B                                                                                                               | 1.39E-01 | NS | 8.31E-01 | NS | 2.18E-02 | 1.6 |
| A_44_P229079  | NM_017045    | 24708  | Rb1        | retinoblastoma 1                                                                                                          | 4.04E-01 | NS | 7.61E-01 | NS | 1.57E-02 | 1.6 |
| A_64_P046452  | XM_001060756 |        |            |                                                                                                                           | 5.43E-01 | NS | 3.03E-01 | NS | 3.74E-02 | 1.6 |
| A_42_P574588  | NM_001131012 | 313418 | Mier1      | mesoderm induction early response 1 homolog (Xenopus laevis)                                                              | 9.20E-01 | NS | 9.90E-02 | NS | 4.82E-02 | 1.6 |
| A_44_P526933  | NM_053357    | 84353  | Ctnnb1     | catenin (cadherin associated protein), beta 1                                                                             | 1.56E-01 | NS | 7.85E-01 | NS | 2.42E-02 | 1.6 |
| A_64_P027404  | NM_134351    | 171347 | Mat2a      | methionine adenosyltransferase II, alpha proteasome (prosome, macropain) 26S subunit, ATPase 3                            | 1.71E-01 | NS | 2.44E-01 | NS | 2.61E-02 | 1.6 |
| A_44_P223252  | NM_031595    | 29677  | Psmc3      | malate dehydrogenase 1, NAD (soluble) similar to RING finger protein 11 (NEDD4)                                           | 4.90E-01 | NS | 9.79E-01 | NS | 2.34E-02 | 1.6 |
| A_44_P324430  | NM_033235    | 24551  | Mdh1       | WW domain-binding protein 2) (Sid 1669)                                                                                   | 4.49E-01 | NS | 8.38E-01 | NS | 3.14E-02 | 1.6 |
| A_64_P063330  | XM_001067720 | 683844 | LOC683844  | tetratricopeptide repeat domain 7B                                                                                        | 9.94E-01 | NS | 3.24E-01 | NS | 5.46E-03 | 1.6 |
| A_42_P477625  | NM_001108719 | 362768 | Ttc7b      | translocase of inner mitochondrial membrane 23 homolog (yeast)                                                            | 3.76E-01 | NS | 2.54E-01 | NS | 4.41E-02 | 1.6 |
| A_64_P144240  | NM_019352    | 54312  | Timm23     | B-cell receptor-associated protein 29                                                                                     | 1.49E-01 | NS | 1.62E-01 | NS | 3.68E-02 | 1.6 |
| A_44_P183075  | NM_001006980 | 298943 | Bcap29     | syntaxin binding protein 5 (tomosyn)                                                                                      | 5.38E-01 | NS | 2.88E-01 | NS | 2.93E-02 | 1.6 |
| A_44_P163189  | NM_178345    | 81022  | Stxbp5     | leprecan-like 1                                                                                                           | 7.05E-01 | NS | 2.74E-01 | NS | 2.59E-02 | 1.6 |
| A_44_P436604  | NM_001025627 | 288016 | Leprel1    |                                                                                                                           | 2.83E-01 | NS | 1.19E-01 | NS | 2.23E-02 | 1.6 |
| A_64_P128336  | XM_223212    |        |            |                                                                                                                           | 7.53E-02 | NS | 1.06E-01 | NS | 3.80E-02 | 1.6 |
| A_44_P381069  | NM_017073    | 24957  | Glul       | glutamate-ammonia ligase (glutamine synthetase)                                                                           | 7.71E-01 | NS | 7.95E-01 | NS | 4.25E-02 | 1.6 |
| A_44_P100870  | NM_001108697 | 362676 | RGD1308251 | similar to RIKEN cDNA 2810405K02                                                                                          | 6.02E-01 | NS | 6.47E-01 | NS | 3.32E-02 | 1.6 |
| A_42_P701991  | NM_001100671 | 298757 | Ati2       | atlastin GTPase 2                                                                                                         | 7.07E-01 | NS | 2.81E-01 | NS | 8.21E-03 | 1.6 |
| A_44_P1013048 | NM_001025647 | 294667 | RGD1310597 | similar to RIKEN cDNA 1200014M14 family with sequence similarity 78, member A                                             | 5.25E-01 | NS | 1.41E-01 | NS | 2.39E-02 | 1.6 |
| A_44_P974618  | XM_001079857 | 499776 | Fam78a     | glutathione S-transferase omega 1                                                                                         | 3.25E-01 | NS | 7.81E-02 | NS | 2.97E-02 | 1.6 |
| A_44_P1025790 | NM_001007602 | 114846 | Gsto1      |                                                                                                                           | 5.02E-01 | NS | 5.21E-01 | NS | 1.63E-02 | 1.6 |
| A_42_P700753  | FQ212883     |        |            |                                                                                                                           | 3.55E-01 | NS | 2.39E-01 | NS | 4.99E-02 | 1.6 |
| A_44_P606085  | NM_001109217 | 499974 | Nupl2      | nucleoporin like 2                                                                                                        | 1.75E-01 | NS | 9.58E-01 | NS | 3.90E-02 | 1.6 |
| A_64_P004771  | XM_001080976 |        |            |                                                                                                                           | 1.63E-01 | NS | 6.03E-02 | NS | 3.90E-02 | 1.7 |
| A_44_P443412  | NM_001029917 | 298787 | Memo1      | mediator of cell motility 1                                                                                               | 9.96E-01 | NS | 5.52E-01 | NS | 4.01E-02 | 1.7 |
| A_64_P260746  | XR_008562    |        |            |                                                                                                                           | 5.50E-01 | NS | 7.42E-02 | NS | 4.70E-02 | 1.7 |
| A_64_P111460  | NM_001107045 | 303499 | Sp2        | Sp2 transcription factor                                                                                                  | 2.97E-01 | NS | 8.28E-01 | NS | 4.01E-02 | 1.7 |
| A_42_P703023  | NM_145776    | 252919 | Slc38a3    | solute carrier family 38, member 3 CTD (carboxy-terminal domain, RNA polymerase II, polypeptide A) phosphatase, subunit 1 | 1.25E-01 | NS | 6.52E-01 | NS | 3.98E-02 | 1.7 |
| A_44_P144916  | NM_001106131 | 291414 | Ctdp1      |                                                                                                                           | 1.18E-01 | NS | 1.48E-01 | NS | 2.86E-02 | 1.7 |
| A_44_P877632  | XM_002729016 |        |            |                                                                                                                           | 1.58E-01 | NS | 9.77E-02 | NS | 2.85E-02 | 1.7 |
| A_44_P508566  | NM_001107195 | 304960 | Olfml2b    | olfactomedin-like 2B                                                                                                      | 7.70E-01 | NS | 1.92E-01 | NS | 4.69E-02 | 1.7 |
| A_44_P1038266 | XM_001057312 | 362528 | Fkbp15     | FK506 binding protein 15                                                                                                  | 1.23E-01 | NS | 9.08E-01 | NS | 4.98E-02 | 1.7 |
| A_64_P105879  | XM_220957    |        |            |                                                                                                                           | 7.39E-02 | NS | 6.90E-01 | NS | 4.85E-03 | 1.7 |

|              |              |        |            |                                                                                                                                                                                                |          |    |          |    |          |     |
|--------------|--------------|--------|------------|------------------------------------------------------------------------------------------------------------------------------------------------------------------------------------------------|----------|----|----------|----|----------|-----|
| A_64_P028773 | NM_001108904 | 365176 | Znf787     | zinc finger protein 787                                                                                                                                                                        | 2.45E-01 | NS | 4.92E-01 | NS | 3.77E-02 | 1.7 |
| A_42_P777329 | NM_001106943 | 302415 | Foxo4      | forkhead box O4                                                                                                                                                                                | 4.76E-01 | NS | 4.12E-01 | NS | 4.03E-02 | 1.7 |
| A_64_P055477 | NM_019286    | 24172  | Adh1       | alcohol dehydrogenase 1 (class I) polymerase (RNA) III (DNA directed)                                                                                                                          | 4.97E-01 | NS | 3.63E-01 | NS | 1.69E-02 | 1.7 |
| A_44_P591437 | NM_001031653 | 306012 | Polr3d     | polypeptide D                                                                                                                                                                                  | 4.13E-01 | NS | 1.83E-01 | NS | 1.19E-02 | 1.7 |
| A_64_P097764 | NM_001108431 | 361326 | Dtw2       | DTW domain containing 2                                                                                                                                                                        | 7.41E-01 | NS | 6.03E-01 | NS | 3.71E-02 | 1.7 |
| A_64_P037020 | NM_001134754 | 362713 | Seli       | selenoprotein I                                                                                                                                                                                | 4.02E-01 | NS | 9.11E-01 | NS | 1.36E-03 | 1.7 |
| A_64_P039112 | NM_022210    | 60661  | Max        | MYC associated factor X                                                                                                                                                                        | 1.65E-01 | NS | 9.78E-01 | NS | 1.49E-02 | 1.7 |
| A_64_P128852 | NM_017163    | 29323  | Slc6a18    | solute carrier family 6, member 18                                                                                                                                                             | 1.12E-01 | NS | 1.04E-01 | NS | 3.64E-02 | 1.7 |
| A_64_P116665 | NM_001017380 | 312937 | Cyld       | cyndromatosis (turban tumor syndrome)                                                                                                                                                          | 6.43E-01 | NS | 5.16E-01 | NS | 2.89E-02 | 1.7 |
| A_64_P034324 | NM_001108282 | 360569 | RGD1309077 | similar to putative RNA methyltransferase                                                                                                                                                      | 2.30E-01 | NS | 4.26E-01 | NS | 3.05E-02 | 1.7 |
| A_64_P081536 | NM_019196    | 29365  | Mpdz       | multiple PDZ domain protein                                                                                                                                                                    | 1.20E-01 | NS | 6.92E-01 | NS | 4.19E-02 | 1.7 |
| A_64_P052887 | XM_002730084 |        |            |                                                                                                                                                                                                | 9.94E-01 | NS | 1.72E-01 | NS | 3.04E-02 | 1.7 |
| A_44_P463530 | NM_145081    | 246294 | Optn       | optineurin<br>general transcription factor IIIC, polypeptide 3                                                                                                                                 | 8.05E-01 | NS | 3.72E-01 | NS | 4.50E-02 | 1.7 |
| A_64_P013624 | NM_001108239 | 316810 | Gtf3c3     |                                                                                                                                                                                                | 5.24E-01 | NS | 2.53E-01 | NS | 3.08E-02 | 1.7 |
| A_42_P810313 | NM_001108677 | 362591 | Mtf1       | metal-regulatory transcription factor 1<br>fasciculation and elongation protein zeta 1 (zygin I)                                                                                               | 6.96E-01 | NS | 5.08E-01 | NS | 1.96E-02 | 1.7 |
| A_44_P334953 | NM_031066    | 81730  | Fez1       |                                                                                                                                                                                                | 8.93E-01 | NS | 3.94E-01 | NS | 3.92E-02 | 1.7 |
| A_42_P463880 | NM_001013927 | 297694 | Plbd1      | phospholipase B domain containing 1                                                                                                                                                            | 2.02E-01 | NS | 3.26E-01 | NS | 4.48E-02 | 1.7 |
| A_64_P006316 | NM_001109387 | 680006 | Mad11      | MAD1 mitotic arrest deficient-like 1 (yeast)                                                                                                                                                   | 9.92E-01 | NS | 6.97E-01 | NS | 2.72E-02 | 1.7 |
| A_44_P531063 | NM_031643    | 170851 | Map2k1     | mitogen activated protein kinase kinase 1                                                                                                                                                      | 6.59E-01 | NS | 9.50E-01 | NS | 3.70E-02 | 1.7 |
| A_64_P037264 | NM_181386    | 353229 | Sgms1      | sphingomyelin synthase 1                                                                                                                                                                       | 1.65E-01 | NS | 1.70E-01 | NS | 4.90E-02 | 1.7 |
| A_44_P135224 | NM_022187    | 58936  | Plk3       | polo-like kinase 3 (Drosophila)                                                                                                                                                                | 1.34E-01 | NS | 3.54E-01 | NS | 3.85E-02 | 1.7 |
| A_42_P525886 | NM_001105716 | 25061  | Crabp1     | cellular retinoic acid binding protein 1<br>chaperonin containing TCP1, subunit 2 (beta)                                                                                                       | 8.16E-01 | NS | 8.55E-01 | NS | 3.59E-02 | 1.7 |
| A_44_P215794 | NM_001005905 | 299809 | Cct2       |                                                                                                                                                                                                | 2.17E-01 | NS | 2.53E-01 | NS | 3.85E-02 | 1.7 |
| A_44_P508434 | NM_031522    | 24591  | Neu1       | sialidase 1 (lysosomal sialidase)                                                                                                                                                              | 5.71E-01 | NS | 3.71E-01 | NS | 4.93E-02 | 1.7 |
| A_64_P075630 | XM_001076027 | 299625 | Lmnb2      | lamin B2                                                                                                                                                                                       | 6.44E-01 | NS | 1.18E-01 | NS | 1.68E-02 | 1.7 |
| A_64_P133632 | NM_001134572 | 361224 | RGD1306058 | similar to RIKEN cDNA 1110007C09                                                                                                                                                               | 7.69E-01 | NS | 2.53E-01 | NS | 3.76E-02 | 1.7 |
| A_43_P12243  | NM_022540    | 64371  | Prdx3      | peroxiredoxin 3                                                                                                                                                                                | 9.31E-01 | NS | 6.76E-01 | NS | 2.87E-02 | 1.7 |
| A_64_P013491 | NM_053638    | 114096 | Idh3a      | isocitrate dehydrogenase 3 (NAD+) alpha                                                                                                                                                        | 2.68E-01 | NS | 4.35E-01 | NS | 4.30E-02 | 1.7 |
| A_44_P193704 | NM_001011932 | 293060 | Btd1       | BTB (POZ) domain containing 1<br>similar to suppressor of hairy wing homolog 4 isoform 1                                                                                                       | 8.53E-01 | NS | 8.00E-01 | NS | 4.06E-02 | 1.7 |
| A_64_P001147 | NM_001108165 | 315798 | RGD1560796 |                                                                                                                                                                                                | 6.77E-01 | NS | 5.75E-01 | NS | 5.28E-03 | 1.7 |
| A_64_P076765 | NM_013065    | 25594  | Ppp1cb     | protein phosphatase 1, catalytic subunit, beta isoform                                                                                                                                         | 8.08E-01 | NS | 9.56E-01 | NS | 2.48E-02 | 1.7 |
| A_64_P124417 | NM_053466    | 84598  | Jak1       | Janus kinase 1                                                                                                                                                                                 | 1.34E-01 | NS | 8.89E-01 | NS | 3.50E-02 | 1.7 |
| A_42_P636400 | NM_138547    | 191574 | Akr1c14    | aldo-keto reductase family 1, member C14                                                                                                                                                       | 1.17E-01 | NS | 3.39E-01 | NS | 1.91E-02 | 1.7 |
| A_64_P015502 | NM_013159    | 25700  | Ide        | insulin degrading enzyme                                                                                                                                                                       | 9.91E-01 | NS | 6.59E-01 | NS | 4.38E-02 | 1.7 |
| A_64_P128874 | NM_001025755 | 367620 | MGC116197  | similar to RIKEN cDNA 1700001E04<br>transient receptor potential cation channel, subfamily V, member 1                                                                                         | 6.61E-01 | NS | 7.25E-02 | NS | 2.47E-02 | 1.7 |
| A_64_P061740 | NM_031982    | 83810  | Trpv1      |                                                                                                                                                                                                | 9.94E-01 | NS | 4.84E-01 | NS | 1.20E-02 | 1.7 |
| A_64_P118950 | NM_001024278 | 367171 | Map4       | microtubule-associated protein 4<br>chaperonin containing Tcp1, subunit 6A (zeta 1)                                                                                                            | 6.34E-02 | NS | 2.56E-01 | NS | 2.53E-02 | 1.7 |
| A_64_P116163 | NM_001033684 | 288620 | Cct6a      |                                                                                                                                                                                                | 5.92E-02 | NS | 9.51E-01 | NS | 1.83E-02 | 1.7 |
| A_64_P070721 | NM_053974    | 117045 | Eif4e      | eukaryotic translation initiation factor 4E<br>ATP-binding cassette, sub-family B (MDR/TAP), member 7                                                                                          | 4.82E-01 | NS | 6.47E-01 | NS | 2.27E-02 | 1.7 |
| A_43_P21510  | NM_212518    | 302395 | Abcb7      |                                                                                                                                                                                                | 9.02E-01 | NS | 4.80E-01 | NS | 6.82E-03 | 1.7 |
| A_44_P295118 | NM_001107228 | 305461 | Fam53a     | family with sequence similarity 53, member A<br>methylenetetrahydrofolate dehydrogenase (NADP+ dependent) 1,<br>methylenetetrahydrofolate cyclohydrolase,<br>formyltetrahydrofolate synthetase | 5.27E-02 | NS | 6.44E-01 | NS | 3.72E-02 | 1.7 |
| A_42_P481696 | NM_022508    | 64300  | Mthfd1     | similar to Zinc finger protein 398 (Zinc finger DNA binding protein p52/p71)                                                                                                                   | 5.86E-01 | NS | 4.70E-01 | NS | 1.61E-02 | 1.7 |
| A_64_P029775 | NM_001014056 | 312301 | RGD1304879 |                                                                                                                                                                                                | 1.53E-01 | NS | 6.92E-02 | NS | 7.45E-03 | 1.7 |
| A_44_P274650 | NM_001107968 | 313548 | Znf691     | zinc finger protein 691                                                                                                                                                                        | 9.89E-02 | NS | 8.44E-01 | NS | 4.51E-02 | 1.7 |

|               |              |           |              |                                                                                   |          |    |          |    |          |     |
|---------------|--------------|-----------|--------------|-----------------------------------------------------------------------------------|----------|----|----------|----|----------|-----|
| A_64_P075870  | XM_001056555 | 316732    | Smchd1       | structural maintenance of chromosomes flexible hinge domain containing 1          | 9.28E-01 | NS | 5.74E-02 | NS | 2.46E-02 | 1.7 |
| A_44_P790155  | NM_001106869 | 301082    | Cdcp1        | CUB domain containing protein 1                                                   | 8.73E-01 | NS | 7.55E-01 | NS | 3.25E-02 | 1.7 |
| A_44_P279780  | NM_001012459 | 29313     | Clec11a      | C-type lectin domain family 11, member a                                          | 6.75E-01 | NS | 3.89E-01 | NS | 4.07E-03 | 1.7 |
| A_44_P379878  | NM_001107257 | 305830    | Fbxo34       | F-box protein 34                                                                  | 9.40E-02 | NS | 9.31E-01 | NS | 1.59E-02 | 1.7 |
| A_44_P1007438 | NM_001044238 | 303407    | Gdpd1        | glycerophosphodiester phosphodiesterase domain containing 1                       | 6.27E-01 | NS | 3.84E-01 | NS | 3.01E-02 | 1.7 |
| A_44_P369399  | NM_145774    | 252916    | Rab38        | RAB38, member RAS oncogene family                                                 | 6.89E-01 | NS | 3.97E-01 | NS | 4.72E-02 | 1.7 |
| A_64_P122153  | NM_001109556 | 689931    | Osap         | ovary-specific acidic protein                                                     | 9.76E-01 | NS | 8.78E-01 | NS | 2.47E-02 | 1.7 |
| A_64_P033909  | NM_183402    | 192147    | Grin1a       | glutamate receptor, ionotropic, N-methyl D-aspartate-like 1A                      | 7.46E-01 | NS | 1.14E-01 | NS | 4.81E-02 | 1.7 |
| A_44_P367952  | XM_223390    |           |              |                                                                                   | 4.31E-01 | NS | 1.59E-01 | NS | 2.76E-02 | 1.7 |
| A_44_P157078  | NM_001106730 | 299050    | RGD1305089   | similar to 1110008L16Rik protein                                                  | 4.27E-01 | NS | 1.51E-01 | NS | 2.97E-02 | 1.7 |
| A_44_P558652  | NM_001079892 | 317628    | RGD1565983   | similar to apurinic/aprimidinic endonuclease 2                                    | 5.72E-01 | NS | 8.12E-01 | NS | 3.16E-02 | 1.8 |
| A_64_P135925  | NM_022398    | 64201     | Slc25a11     | solute carrier family 25 (mitochondrial carrier; oxoglutarate carrier), member 11 | 8.93E-02 | NS | 1.20E-01 | NS | 3.72E-02 | 1.8 |
| A_64_P018726  | NM_053420    | 84480     | Bnip3        | BCL2/adenovirus E1B interacting protein 3                                         | 7.21E-02 | NS | 1.93E-01 | NS | 4.97E-02 | 1.8 |
| A_44_P248705  | NM_001107114 | 304150    | Usp25        | ubiquitin specific peptidase 25                                                   | 1.46E-01 | NS | 7.95E-01 | NS | 4.48E-02 | 1.8 |
| A_44_P130641  | NM_053331    | 79462     | Txn2         | thioredoxin 2                                                                     | 9.58E-02 | NS | 6.58E-01 | NS | 4.11E-02 | 1.8 |
| A_44_P777173  | NM_001013984 | 304860    | Npl          | N-acetylneuraminate pyruvate lyase                                                | 9.93E-01 | NS | 2.90E-01 | NS | 1.58E-02 | 1.8 |
| A_64_P014727  | NM_001139485 | 100196943 | LOC100196943 | glutathione S-transferase mu 3                                                    | 2.72E-01 | NS | 7.98E-01 | NS | 1.34E-02 | 1.8 |
| A_44_P412121  | XM_001070873 | 259270    | Zfp335       | zinc finger protein 335                                                           | 5.49E-01 | NS | 9.52E-01 | NS | 4.53E-02 | 1.8 |
| A_44_P173156  | NM_001106365 | 294018    | Taf5         | TAF5 RNA polymerase II, TATA box binding protein (TBP)-associated factor          | 4.73E-01 | NS | 9.21E-02 | NS | 6.09E-03 | 1.8 |
| A_44_P999910  | XM_223687    | 305583    | Pus10        | pseudouridylylase 10                                                              | 5.50E-01 | NS | 2.37E-01 | NS | 8.14E-03 | 1.8 |
| A_42_P522682  | NM_001107838 | 311902    | Rbm18        | RNA binding motif protein 18                                                      | 1.84E-01 | NS | 5.23E-01 | NS | 3.87E-02 | 1.8 |
| A_64_P018964  | NM_139327    | 117062    | Hmga1        | high mobility group AT-hook 1                                                     | 1.20E-01 | NS | 1.35E-01 | NS | 2.71E-02 | 1.8 |
| A_44_P511101  | NM_001135757 | 361288    | Fundc2       | FUN14 domain containing 2                                                         | 4.14E-01 | NS | 3.01E-01 | NS | 3.05E-02 | 1.8 |
| A_64_P048408  | NM_001008858 | 361787    | RT1-T24-1    | RT1 class I, locus T24, gene 1                                                    | 2.24E-01 | NS | 9.62E-01 | NS | 3.37E-02 | 1.8 |
| A_43_P17072   | NM_001012040 | 305684    | Samd8        | sterile alpha motif domain containing 8                                           | 8.08E-02 | NS | 6.24E-01 | NS | 2.67E-02 | 1.8 |
| A_44_P204207  | NM_001105810 | 287525    | Smyd4        | SET and MYND domain containing 4                                                  | 9.47E-02 | NS | 2.08E-01 | NS | 4.42E-02 | 1.8 |
| A_44_P164007  | XM_343060    | 362736    | Hectd1       | HECT domain containing 1                                                          | 7.19E-01 | NS | 3.25E-01 | NS | 2.23E-02 | 1.8 |
| A_64_P027449  | NM_024142    | 79110     | Mepe         | matrix extracellular phosphoglycoprotein IMP (inosine monophosphate)              | 1.65E-01 | NS | 6.15E-01 | NS | 1.15E-02 | 1.8 |
| A_44_P158420  | NM_199099    | 301005    | Impdh2       | dehydrogenase 2                                                                   | 8.31E-01 | NS | 5.12E-01 | NS | 5.25E-03 | 1.8 |
| A_64_P155584  | XM_218807    |           |              |                                                                                   | 7.58E-02 | NS | 5.29E-02 | NS | 3.16E-02 | 1.8 |
| A_44_P896107  | NM_001017502 | 498404    | Ccdc117      | coiled-coil domain containing 117                                                 | 5.94E-01 | NS | 2.16E-01 | NS | 2.24E-02 | 1.8 |
| A_44_P999488  | NM_080897    | 140932    | Bnip1        | BCL2/adenovirus E1B interacting protein 1                                         | 8.41E-01 | NS | 4.08E-01 | NS | 4.97E-02 | 1.8 |
| A_44_P548203  | NM_053696    | 114488    | Rbm3         | RNA binding motif (RNP1, RRM) protein 3                                           | 1.72E-01 | NS | 5.69E-01 | NS | 3.47E-02 | 1.8 |
| A_44_P532548  | NM_001014120 | 360627    | Fkbp10       | FK506 binding protein 10                                                          | 9.32E-02 | NS | 5.51E-01 | NS | 4.38E-02 | 1.8 |
| A_42_P749550  | NM_001109359 | 503035    | Tmem229b     | transmembrane protein 229B                                                        | 2.71E-01 | NS | 1.79E-01 | NS | 3.65E-02 | 1.8 |
| A_64_P130362  | XM_001065735 | 500326    | RGD1562216   | similar to TEA domain family member 4 (ETF-related factor-2b)                     | 2.26E-01 | NS | 8.43E-01 | NS | 2.62E-02 | 1.8 |
| A_44_P1004840 | NM_181384    | 353218    | Tnfsf9       | tumor necrosis factor (ligand) superfamily, member 9                              | 2.56E-01 | NS | 2.45E-01 | NS | 4.10E-02 | 1.8 |
| A_42_P752336  | NM_017029    | 24588     | Nefm         | neurofilament, medium polypeptide                                                 | 7.61E-01 | NS | 5.31E-01 | NS | 2.38E-02 | 1.8 |
| A_64_P035483  | NM_001000927 | 405246    | Olr606       | olfactory receptor 606                                                            | 5.53E-01 | NS | 1.83E-01 | NS | 2.58E-02 | 1.8 |
| A_44_P192244  | NM_001107757 | 311299    | Aven         | apoptosis, caspase activation inhibitor                                           | 5.00E-01 | NS | 3.11E-01 | NS | 2.36E-02 | 1.8 |
| A_64_P138405  | XM_002726774 |           |              |                                                                                   | 3.36E-01 | NS | 8.74E-01 | NS | 3.45E-02 | 1.8 |
| A_64_P012939  | NM_001013109 | 300799    | Dapk2        | death-associated kinase 2                                                         | 1.44E-01 | NS | 1.14E-01 | NS | 2.63E-02 | 1.8 |
| A_64_P084947  | XM_001068086 | 363306    | LOC363306    | hypothetical protein LOC363306                                                    | 2.96E-01 | NS | 2.09E-01 | NS | 9.33E-03 | 1.8 |
| A_44_P400195  | NM_053825    | 116550    | Atp5c1       | ATP synthase, H+ transporting, mitochondrial F1 complex, gamma polypeptide 1      | 2.48E-01 | NS | 3.38E-01 | NS | 1.18E-02 | 1.8 |
| A_64_P034311  | XM_220010    |           |              |                                                                                   | 1.22E-01 | NS | 7.72E-02 | NS | 3.62E-02 | 1.8 |
| A_42_P592205  | NM_001134413 | 288707    | Gltp         | glycolipid transfer protein                                                       | 1.40E-01 | NS | 5.61E-01 | NS | 1.05E-02 | 1.8 |
| A_44_P284180  | XM_237391    |           |              |                                                                                   | 1.52E-01 | NS | 1.67E-01 | NS | 4.74E-02 | 1.8 |
| A_44_P198535  | NM_057103    | 83425     | Akap12       | A kinase (PRKA) anchor protein 12                                                 | 4.95E-01 | NS | 6.06E-01 | NS | 4.33E-02 | 1.8 |
| A_64_P082037  | XM_001054805 | 679127    | LOC679127    | similar to Protein KIAA0690                                                       | 7.21E-01 | NS | 7.40E-01 | NS | 2.80E-02 | 1.8 |

|               |              |        |            |                                                                                             |          |    |          |    |          |     |
|---------------|--------------|--------|------------|---------------------------------------------------------------------------------------------|----------|----|----------|----|----------|-----|
| A_43_P18504   | NM_031717    | 65157  | Amotl2     | angiominin like 2                                                                           | 1.02E-01 | NS | 3.11E-01 | NS | 2.78E-02 | 1.8 |
| A_64_P090479  | NM_001005889 | 315655 | Rdx        | radixin                                                                                     | 3.08E-01 | NS | 4.06E-01 | NS | 3.20E-02 | 1.8 |
| A_44_P1032296 | NM_001013086 | 297339 | Capg       | capping protein (actin filament), gelsolin-like                                             | 3.74E-01 | NS | 4.65E-01 | NS | 4.40E-02 | 1.8 |
| A_64_P178800  | NM_219703    | 309252 | Otud7a     | OTU domain containing 7A                                                                    | 9.27E-01 | NS | 1.16E-01 | NS | 1.65E-02 | 1.8 |
| A_44_P484755  | NM_001004132 | 81741  | Pctk1      | PCTAIRE protein kinase 1                                                                    | 1.32E-01 | NS | 6.89E-01 | NS | 4.05E-02 | 1.8 |
| A_64_P048183  | NM_001169139 | 306575 | Kcap2      | cytoskeleton associated protein 2                                                           | 2.89E-01 | NS | 5.70E-01 | NS | 4.12E-02 | 1.8 |
| A_64_P025432  | XR_005439    | 498829 | LOC498829  | Ab2-143                                                                                     | 5.31E-01 | NS | 8.87E-01 | NS | 3.91E-02 | 1.8 |
| A_44_P357338  | NM_031579    | 29463  | Ptp4a1     | protein tyrosine phosphatase 4a1                                                            | 6.89E-02 | NS | 9.44E-01 | NS | 3.21E-02 | 1.8 |
| A_64_P067868  | XM_226431    | 291958 | B3gnt9     | UDP-GlcNAc:betaGal beta-1,3-N-acetylglucosaminyltransferase 9                               | 5.78E-02 | NS | 9.67E-02 | NS | 4.95E-02 | 1.8 |
| A_64_P030724  | XR_009633    |        |            |                                                                                             | 1.86E-01 | NS | 1.29E-01 | NS | 4.93E-02 | 1.8 |
| A_43_P22225   | NM_001107618 | 309659 | Mdga1      | MAM domain containing glycosylphosphatidylinositol anchor 1                                 | 1.88E-01 | NS | 1.92E-01 | NS | 3.05E-02 | 1.8 |
| A_44_P183220  | NM_001024793 | 360643 | Cdc27      | cell division cycle 27 homolog (S. cerevisiae)                                              | 6.00E-02 | NS | 9.34E-01 | NS | 5.27E-03 | 1.8 |
| A_64_P105815  | XM_224528    |        |            |                                                                                             | 2.69E-01 | NS | 3.84E-01 | NS | 4.47E-02 | 1.8 |
| A_42_P583690  | NM_053950    | 117019 | Eif2b4     | eukaryotic translation initiation factor 2B, subunit 4 delta                                | 7.18E-02 | NS | 9.80E-01 | NS | 3.65E-02 | 1.9 |
| A_64_P158148  | NM_001012061 | 308113 | Cnksr3     | Cnksr family member 3                                                                       | 3.48E-01 | NS | 6.61E-01 | NS | 1.06E-02 | 1.9 |
| A_44_P179986  | NM_017233    | 29531  | Hpd        | 4-hydroxyphenylpyruvate dioxygenase                                                         | 4.32E-01 | NS | 6.87E-01 | NS | 3.46E-02 | 1.9 |
| A_64_P086061  | NM_001109393 | 680130 | Timp4      | tissue inhibitor of metalloproteinase 4                                                     | 9.30E-01 | NS | 6.44E-01 | NS | 1.71E-02 | 1.9 |
| A_64_P159488  | NM_001107962 | 313520 | Mmachc     | methylmalonic aciduria (cobalamin deficiency) cblC type, with homocystinuria                | 1.29E-01 | NS | 4.81E-01 | NS | 2.65E-02 | 1.9 |
| A_64_P313659  | NM_057102    | 25176  | Slc25a5    | solute carrier family 25 (mitochondrial carrier; adenine nucleotide translocator), member 5 | 8.12E-02 | NS | 3.26E-01 | NS | 2.03E-02 | 1.9 |
| A_43_P12209   | NM_022380    | 25126  | Stat5b     | signal transducer and activator of transcription 5B                                         | 1.18E-01 | NS | 6.32E-01 | NS | 1.46E-02 | 1.9 |
| A_44_P137981  | XM_225973    |        |            |                                                                                             | 1.72E-01 | NS | 2.59E-01 | NS | 2.97E-02 | 1.9 |
| A_44_P182402  | NM_001012061 | 308113 | Cnksr3     | Cnksr family member 3                                                                       | 3.99E-01 | NS | 5.91E-01 | NS | 2.42E-02 | 1.9 |
| A_64_P108667  | NM_001109664 | 292739 | RGD1307554 | similar to CG16812-PA                                                                       | 7.38E-02 | NS | 6.91E-01 | NS | 9.47E-03 | 1.9 |
| A_44_P497310  | XM_221355    | 288026 | Atp13a4    | ATPase type 13A4                                                                            | 8.29E-01 | NS | 3.68E-01 | NS | 3.31E-02 | 1.9 |
| A_44_P201028  | NM_053727    | 114519 | Nfil3      | nuclear factor, interleukin 3 regulated                                                     | 7.05E-01 | NS | 2.81E-01 | NS | 1.92E-02 | 1.9 |
| A_64_P003560  | XM_228074    |        |            |                                                                                             | 5.50E-01 | NS | 9.86E-01 | NS | 3.16E-02 | 1.9 |
| A_43_P20684   | NM_001014260 | 366431 | LOC366431  | similar to RIKEN cDNA 2210012G02                                                            | 8.27E-01 | NS | 2.52E-01 | NS | 4.73E-02 | 1.9 |
| A_44_P287301  | NM_001107084 | 303836 | Bcl6       | B-cell CLL/lymphoma 6                                                                       | 8.43E-01 | NS | 6.15E-01 | NS | 1.27E-02 | 1.9 |
| A_64_P015739  | NM_022588    | 64520  | Mta1       | metastasis associated 1                                                                     | 4.07E-01 | NS | 9.76E-01 | NS | 4.04E-02 | 1.9 |
| A_64_P141420  | NM_001031642 | 291091 | Serpinb1a  | serine (or cysteine) proteinase inhibitor, clade B, member 1a                               | 2.91E-01 | NS | 5.08E-02 | NS | 3.44E-02 | 1.9 |
| A_64_P041184  | NM_017238    | 29555  | Vipr2      | vasoactive intestinal peptide receptor 2                                                    | 6.43E-01 | NS | 8.96E-01 | NS | 3.48E-02 | 1.9 |
| A_64_P077892  | NM_183402    | 192147 | Grinl1a    | glutamate receptor, ionotropic, N-methyl D-aspartate-like 1A                                | 2.15E-01 | NS | 9.48E-01 | NS | 4.89E-02 | 1.9 |
| A_44_P321115  | NM_001106004 | 289603 | Commmd8    | COMM domain containing 8                                                                    | 4.25E-01 | NS | 4.62E-01 | NS | 4.23E-02 | 1.9 |
| A_44_P352055  | FQ224249     |        |            |                                                                                             | 6.17E-02 | NS | 5.68E-02 | NS | 4.17E-02 | 1.9 |
| A_44_P214415  | NM_001127527 | 299810 | Yeats4     | YEATS domain containing 4                                                                   | 6.59E-01 | NS | 9.38E-01 | NS | 3.87E-02 | 1.9 |
| A_64_P142524  | NM_019367    | 54398  | Ppt2       | palmitoyl-protein thioesterase 2                                                            | 1.41E-01 | NS | 1.24E-01 | NS | 3.34E-02 | 1.9 |
| A_44_P808769  | NM_022198    | 60586  | Cicn4-2    | chloride channel 4-2                                                                        | 1.52E-01 | NS | 1.04E-01 | NS | 4.46E-02 | 1.9 |
| A_44_P226597  | NM_172322    | 282817 | Pycard     | PYD and CARD domain containing                                                              | 9.28E-01 | NS | 5.15E-01 | NS | 4.40E-02 | 1.9 |
| A_64_P054568  | NM_001109082 | 498309 | Vash2      | vasohibin 2                                                                                 | 4.03E-01 | NS | 5.62E-01 | NS | 3.09E-03 | 1.9 |
| A_44_P962936  | NM_001037214 | 500727 | Cdca4      | cell division cycle associated 4                                                            | 1.67E-01 | NS | 6.91E-01 | NS | 4.99E-02 | 1.9 |
| A_64_P104488  | NM_001012116 | 315033 | Spag1      | sperm associated antigen 1                                                                  | 6.29E-01 | NS | 5.65E-01 | NS | 8.56E-03 | 1.9 |
| A_44_P149412  | NM_053563    | 89827  | Ddx39      | DEAD (Asp-Glu-Ala-Asp) box polypeptide 39                                                   | 7.56E-01 | NS | 1.50E-01 | NS | 1.96E-02 | 1.9 |
| A_44_P326122  | NM_001107816 | 311795 | RGD1308019 | similar to hypothetical protein FLJ20245                                                    | 5.16E-01 | NS | 3.14E-01 | NS | 1.84E-02 | 1.9 |
| A_44_P297974  | NM_001105846 | 287746 | Fmnl1      | formin-like 1                                                                               | 1.15E-01 | NS | 5.69E-01 | NS | 2.35E-02 | 1.9 |
| A_44_P681642  | NM_001106963 | 302697 | Eif1ay     | eukaryotic translation initiation factor 1A, Y-linked                                       | 7.59E-01 | NS | 9.60E-01 | NS | 1.54E-02 | 1.9 |
| A_44_P110352  | XM_235459    |        |            |                                                                                             | 3.06E-01 | NS | 4.84E-01 | NS | 4.88E-02 | 1.9 |

|              |              |        |            |                                                                                   |          |    |          |    |          |     |
|--------------|--------------|--------|------------|-----------------------------------------------------------------------------------|----------|----|----------|----|----------|-----|
| A_64_P157450 | NM_001107410 | 307645 | Gpr114     | G protein-coupled receptor 114                                                    | 6.21E-02 | NS | 4.34E-01 | NS | 4.86E-03 | 1.9 |
| A_64_P061658 | NM_172030    | 64467  | Entpd2     | ectonucleoside triphosphate diphosphohydrolase 2                                  | 2.82E-01 | NS | 6.94E-01 | NS | 3.30E-02 | 1.9 |
| A_64_P023472 | NM_001031642 | 291091 | Serpinb1a  | serine (or cysteine) proteinase inhibitor, clade B, member 1a                     | 5.89E-01 | NS | 8.90E-02 | NS | 2.67E-02 | 1.9 |
| A_44_P863933 | XM_001080233 | 687813 | LOC687813  | similar to Trf receptor-associated factor 1                                       | 1.41E-01 | NS | 8.44E-01 | NS | 3.05E-02 | 1.9 |
| A_44_P483992 | XM_001053761 | 678910 | LOC678910  | similar to CG9967-PA, isoform A                                                   | 4.85E-01 | NS | 8.82E-01 | NS | 3.23E-02 | 1.9 |
| A_64_P103517 | NM_001105994 | 289440 | Ephx4      | epoxide hydrolase 4                                                               | 1.66E-01 | NS | 8.63E-01 | NS | 3.08E-02 | 1.9 |
| A_44_P448710 | NM_053492    | 85254  | Slc44a1    | solute carrier family 44, member 1                                                | 6.42E-01 | NS | 4.59E-01 | NS | 4.53E-02 | 1.9 |
| A_44_P367926 | XM_213990    |        |            |                                                                                   | 9.40E-01 | NS | 2.42E-01 | NS | 2.60E-02 | 2.0 |
| A_44_P498522 | NM_001108871 | 364410 | Kctd9      | potassium channel tetramerisation domain containing 9                             | 2.30E-01 | NS | 5.59E-01 | NS | 4.27E-02 | 2.0 |
| A_43_P15993  | NM_012711    | 25021  | Itgam      | integrin, alpha M                                                                 | 7.77E-01 | NS | 8.69E-01 | NS | 4.07E-02 | 2.0 |
| A_44_P431150 | NM_001107152 | 304573 | Pole       | polymerase (DNA directed), epsilon                                                | 3.55E-01 | NS | 2.21E-01 | NS | 1.55E-02 | 2.0 |
| A_43_P19180  | NM_001100727 | 360521 | Rufy1      | RUN and FYVE domain containing 1                                                  | 9.44E-01 | NS | 4.81E-01 | NS | 4.96E-02 | 2.0 |
| A_44_P307578 | NM_013004    | 25512  | Phex       | phosphate regulating endopeptidase homolog, X-linked                              | 5.41E-01 | NS | 4.96E-01 | NS | 3.96E-02 | 2.0 |
| A_44_P852833 | NM_001039607 | 294154 | LOC294154  | similar to chromosome 6 open reading frame 106 isoform a                          | 6.03E-02 | NS | 3.38E-01 | NS | 1.73E-02 | 2.0 |
| A_44_P255341 | NM_001107180 | 304817 | Ipo9       | importin 9                                                                        | 5.25E-02 | NS | 8.39E-01 | NS | 4.58E-02 | 2.0 |
| A_64_P143355 | NM_001134715 | 363024 | Slc44a2    | solute carrier family 44, member 2                                                | 1.48E-01 | NS | 9.25E-01 | NS | 3.77E-02 | 2.0 |
| A_43_P16644  | NM_001025402 | 288051 | Umps       | uridine monophosphate synthetase                                                  | 5.71E-01 | NS | 1.81E-01 | NS | 3.76E-02 | 2.0 |
| A_43_P11776  | NM_017014    | 24423  | Gstm1      | glutathione S-transferase mu 1                                                    | 9.40E-01 | NS | 3.88E-01 | NS | 9.53E-04 | 2.0 |
| A_64_P025884 | NM_001109192 | 499688 | Gstm6      | glutathione S-transferase, mu 6                                                   | 8.70E-01 | NS | 4.48E-01 | NS | 3.25E-02 | 2.0 |
| A_44_P613170 | NM_001108814 | 363443 | Ndp        | Norrie disease (pseudoglioma) (human)                                             | 3.47E-01 | NS | 2.22E-01 | NS | 2.54E-02 | 2.0 |
| A_44_P459702 | NM_001108028 | 314196 | L2hgdh     | L-2-hydroxyglutarate dehydrogenase                                                | 1.86E-01 | NS | 8.77E-01 | NS | 2.45E-03 | 2.0 |
| A_64_P033761 | NM_080581    | 140668 | Abcc3      | ATP-binding cassette, sub-family C (CFTR/MRP), member 3                           | 1.29E-01 | NS | 6.40E-01 | NS | 1.15E-02 | 2.0 |
| A_64_P092971 | XM_002729542 | 260327 | Fndc5      | fibronectin type III domain containing 5                                          | 7.09E-02 | NS | 6.93E-02 | NS | 4.15E-02 | 2.0 |
| A_64_P065265 | NM_001109163 | 499322 | Fam111a    | family with sequence similarity 111, member A                                     | 1.72E-01 | NS | 4.86E-01 | NS | 1.23E-02 | 2.0 |
| A_44_P747071 | XM_227600    | 295378 | Vav3       | vav 3 guanine nucleotide exchange factor similar to mitochondrial carrier protein | 1.55E-01 | NS | 6.33E-01 | NS | 2.59E-02 | 2.0 |
| A_44_P321510 | NM_001127574 | 691431 | LOC691431  | MGC4399                                                                           | 6.48E-01 | NS | 1.37E-01 | NS | 3.47E-02 | 2.0 |
| A_44_P363494 | XR_007323    |        |            |                                                                                   | 7.51E-01 | NS | 2.37E-01 | NS | 2.34E-02 | 2.0 |
| A_42_P531684 | NM_001014215 | 363198 | Cenpq      | centromere protein Q                                                              | 1.14E-01 | NS | 9.76E-01 | NS | 3.75E-02 | 2.0 |
| A_64_P098255 | NM_001077640 | 291005 | Gadd45g    | growth arrest and DNA-damage-inducible, gamma                                     | 3.02E-01 | NS | 9.77E-01 | NS | 4.94E-02 | 2.0 |
| A_64_P055958 | XR_009057    |        |            |                                                                                   | 4.83E-01 | NS | 2.52E-01 | NS | 9.55E-03 | 2.0 |
| A_64_P029142 | NM_001107866 | 312478 | Lox13      | lysyl oxidase-like 3                                                              | 2.23E-01 | NS | 5.81E-02 | NS | 1.96E-02 | 2.0 |
| A_44_P424379 | NM_001106597 | 297336 | Usp39      | ubiquitin specific peptidase 39                                                   | 5.58E-01 | NS | 7.13E-01 | NS | 4.28E-02 | 2.0 |
| A_44_P623426 | NM_001079711 | 689055 | Rad51ap1   | RAD51 associated protein 1                                                        | 8.20E-02 | NS | 5.92E-01 | NS | 2.96E-02 | 2.0 |
| A_44_P547045 | NM_001108631 | 362377 | Herc3      | hect domain and RLD 3                                                             | 4.51E-01 | NS | 6.40E-01 | NS | 9.65E-03 | 2.0 |
| A_64_P065492 | NM_001109101 | 498514 | RGD1565222 | similar to RIKEN cDNA 4931414P19                                                  | 2.57E-01 | NS | 8.66E-01 | NS | 4.51E-02 | 2.0 |
| A_43_P10757  | NM_001166586 | 501647 | Fam122b    | family with sequence similarity 122B                                              | 8.75E-01 | NS | 8.87E-01 | NS | 2.94E-02 | 2.0 |
| A_44_P320655 | NM_012950    | 25439  | F2r        | coagulation factor II (thrombin) receptor                                         | 6.27E-01 | NS | 1.01E-01 | NS | 1.73E-02 | 2.0 |
| A_44_P267706 | XR_085883    | 300060 | Apol11a    | apolipoprotein L 11a                                                              | 2.21E-01 | NS | 8.75E-01 | NS | 1.01E-02 | 2.0 |
| A_64_P007789 | XM_229637    | 302075 | RGD1562989 | similar to serine/threonine kinase                                                | 5.68E-02 | NS | 4.83E-01 | NS | 2.14E-02 | 2.0 |
| A_64_P074667 | XR_008611    |        |            |                                                                                   | 6.70E-01 | NS | 8.53E-01 | NS | 6.77E-03 | 2.0 |
| A_42_P457895 | NM_001012462 | 294385 | Supv3l1    | suppressor of var1, 3-like 1 (S. cerevisiae)                                      | 9.34E-01 | NS | 9.19E-01 | NS | 4.28E-02 | 2.0 |
| A_64_P032361 | BC088860     |        |            |                                                                                   | 1.02E-01 | NS | 6.84E-01 | NS | 3.40E-02 | 2.0 |
| A_64_P004993 | NM_001108312 | 360692 | RGD1563888 | similar to DNA segment, Chr 16, ERATO Doi 472, expressed                          | 2.28E-01 | NS | 2.26E-01 | NS | 3.71E-04 | 2.0 |
| A_44_P990376 | NM_133298    | 113955 | Gpnmb      | glycoprotein (transmembrane) nmb                                                  | 5.67E-02 | NS | 4.18E-01 | NS | 4.74E-02 | 2.1 |
| A_44_P520652 | NM_001106616 | 297554 | Csgalnact2 | chondroitin sulfate N-acetylgalactosaminyltransferase 2                           | 6.51E-02 | NS | 7.80E-02 | NS | 1.68E-02 | 2.1 |
| A_42_P629370 | NM_053536    | 85497  | Klf15      | Kruppel-like factor 15                                                            | 1.98E-01 | NS | 2.17E-01 | NS | 3.09E-02 | 2.1 |
| A_44_P529986 | XM_002725837 |        |            |                                                                                   | 1.01E-01 | NS | 2.95E-01 | NS | 2.28E-02 | 2.1 |
| A_64_P045779 | NM_001106880 | 301173 | Plcl2      | phospholipase C-like 2                                                            | 5.36E-02 | NS | 4.90E-01 | NS | 4.27E-02 | 2.1 |

|               |              |        |            |                                                                                                                                  |          |    |          |    |          |     |
|---------------|--------------|--------|------------|----------------------------------------------------------------------------------------------------------------------------------|----------|----|----------|----|----------|-----|
| A_44_P504794  | NM_001085381 | 266706 | Gja7       | gap junction membrane channel protein alpha 7 family with sequence similarity 43, member                                         | 9.95E-01 | NS | 2.53E-01 | NS | 3.30E-02 | 2.1 |
| A_64_P044445  | NM_001039002 | 288031 | Fam43a     | A                                                                                                                                | 6.68E-01 | NS | 8.93E-01 | NS | 2.33E-03 | 2.1 |
| A_44_P203549  | NM_019371    | 54702  | Egln3      | EGL nine homolog 3 (C. elegans)                                                                                                  | 8.39E-02 | NS | 9.80E-01 | NS | 3.26E-02 | 2.1 |
| A_64_P072343  | XM_002727316 | 690977 | LOC690977  | similar to RIKEN cDNA 5031410106                                                                                                 | 8.27E-01 | NS | 4.02E-01 | NS | 4.51E-02 | 2.1 |
| A_64_P116794  | NM_001127557 | 365552 | Rtdr1      | rhabdoid tumor deletion region gene 1                                                                                            | 2.88E-01 | NS | 5.84E-01 | NS | 2.65E-02 | 2.1 |
| A_64_P071873  | NM_013184    | 25730  | Ntf4       | neurotrophin 4 similar to COX10 homolog, cytochrome c oxidase assembly protein, heme A:                                          | 9.59E-01 | NS | 2.74E-01 | NS | 6.14E-03 | 2.1 |
| A_64_P101480  | XM_001077717 | 687381 | LOC687381  | farnesyltransferase similar to glyceraldehyde-3-phosphate dehydrogenase                                                          | 8.96E-02 | NS | 3.62E-01 | NS | 3.01E-02 | 2.1 |
| A_44_P480605  | XM_225871    | 291543 | LOC291543  | frizzled homolog 9 (Drosophila)                                                                                                  | 1.32E-01 | NS | 9.04E-02 | NS | 3.54E-02 | 2.1 |
| A_44_P367465  | NM_153305    | 266608 | Fzd9       |                                                                                                                                  | 6.74E-02 | NS | 1.49E-01 | NS | 1.13E-02 | 2.1 |
| A_64_P156995  | XM_001075556 |        |            |                                                                                                                                  | 7.06E-02 | NS | 2.51E-01 | NS | 1.33E-02 | 2.1 |
| A_42_P662543  | NM_001011972 | 297932 | Atp6v0d2   | ATPase, H+ transporting, lysosomal 38kDa, V0 subunit d2                                                                          | 1.27E-01 | NS | 9.99E-01 | NS | 2.80E-02 | 2.1 |
| A_64_P051272  | NM_001107859 | 312309 | Znf775     | zinc finger protein 775                                                                                                          | 1.94E-01 | NS | 7.58E-02 | NS | 3.92E-02 | 2.1 |
| A_64_P064695  | XM_001057350 |        |            |                                                                                                                                  | 8.51E-01 | NS | 8.88E-01 | NS | 9.22E-03 | 2.1 |
| A_44_P503570  | NM_031339    | 83507  | Parg       | poly (ADP-ribose) glycohydrolase                                                                                                 | 5.14E-02 | NS | 8.97E-01 | NS | 4.45E-02 | 2.1 |
| A_44_P125025  | NM_013174    | 25717  | Tgfb3      | transforming growth factor, beta 3 trimethylguanosine synthase homolog (S. cerevisiae)                                           | 6.47E-01 | NS | 1.82E-01 | NS | 1.86E-02 | 2.1 |
| A_64_P021151  | NM_001107904 | 312947 | Tgs1       |                                                                                                                                  | 7.85E-01 | NS | 7.09E-01 | NS | 5.95E-03 | 2.1 |
| A_44_P255294  | NM_001011934 | 293408 | Hbs1l      | Hbs1-like (S. cerevisiae)                                                                                                        | 8.99E-02 | NS | 2.58E-01 | NS | 4.34E-02 | 2.1 |
| A_44_P1004536 | NM_053995    | 117099 | Bdh1       | 3-hydroxybutyrate dehydrogenase, type 1                                                                                          | 1.77E-01 | NS | 5.35E-02 | NS | 3.09E-03 | 2.1 |
| A_42_P718418  | NM_001025042 | 499856 | Fibin      | fin bud initiation factor homolog (zebrafish)                                                                                    | 6.77E-01 | NS | 6.24E-01 | NS | 1.66E-02 | 2.1 |
| A_44_P104652  | NM_181090    | 29642  | Slc38a2    | solute carrier family 38, member 2                                                                                               | 1.93E-01 | NS | 5.89E-01 | NS | 8.31E-03 | 2.1 |
| A_64_P026752  | XM_229109    |        |            |                                                                                                                                  | 6.70E-02 | NS | 5.20E-02 | NS | 3.83E-02 | 2.1 |
| A_44_P422305  | XM_001072031 | 363244 | RGD1559859 | RGD1559859                                                                                                                       | 1.09E-01 | NS | 3.67E-01 | NS | 3.84E-03 | 2.1 |
| A_42_P629062  | AF072835     | 54395  | Crif3      | cytokine receptor-like factor 3                                                                                                  | 7.46E-01 | NS | 8.87E-01 | NS | 3.43E-03 | 2.1 |
| A_44_P381092  | XM_573525    | 498297 | Cnst       | consortin, connexin sorting protein                                                                                              | 5.73E-01 | NS | 2.40E-01 | NS | 2.07E-02 | 2.1 |
| A_44_P993671  | NM_001108088 | 314772 | Epyc       | epiphycan                                                                                                                        | 3.10E-01 | NS | 4.52E-01 | NS | 3.93E-02 | 2.2 |
| A_44_P159137  | XM_227423    |        |            |                                                                                                                                  | 1.06E-01 | NS | 7.03E-02 | NS | 3.68E-02 | 2.2 |
| A_43_P17937   | NM_001108271 | 360508 | RGD1306625 | LOC360508                                                                                                                        | 9.49E-01 | NS | 8.62E-01 | NS | 6.57E-03 | 2.2 |
| A_44_P317639  | NM_001109082 | 498309 | Vash2      | vasohibin 2                                                                                                                      | 2.12E-01 | NS | 3.69E-01 | NS | 4.38E-02 | 2.2 |
| A_44_P477322  | NM_031831    | 83765  | Rtn4       | reticulon 4                                                                                                                      | 1.18E-01 | NS | 1.37E-01 | NS | 4.91E-02 | 2.2 |
| A_64_P029407  | NM_001037974 | 296345 | Jph2       | junctophilin 2                                                                                                                   | 1.48E-01 | NS | 7.11E-02 | NS | 3.70E-02 | 2.2 |
| A_44_P210202  | NM_053528    | 85472  | Polg       | polymerase (DNA directed), gamma                                                                                                 | 4.08E-01 | NS | 8.76E-01 | NS | 4.95E-02 | 2.2 |
| A_44_P353836  | XM_001055616 | 309570 | RGD1306962 | similar to dJ55C23.6 gene product G-protein signaling modulator 2 (AGS3-like, C. elegans)                                        | 7.85E-01 | NS | 9.56E-01 | NS | 9.11E-03 | 2.2 |
| A_64_P006903  | XM_575015    | 362021 | Gpsm2      |                                                                                                                                  | 9.94E-01 | NS | 6.35E-01 | NS | 1.97E-02 | 2.2 |
| A_64_P017565  | NM_053938    | 116777 | Cdh3       | cadherin 3                                                                                                                       | 9.53E-01 | NS | 9.06E-01 | NS | 4.95E-02 | 2.2 |
| A_44_P308181  | XM_001078902 | 311880 | Gapvd1     | GTPase activating protein and VPS9 domains 1 similar to glyceraldehyde-3-phosphate dehydrogenase (phosphorylating) (EC 1.2.1.12) | 5.20E-02 | NS | 4.68E-01 | NS | 4.74E-02 | 2.2 |
| A_64_P139608  | XM_001066279 | 290604 | RGD1564958 | similar to solute carrier family 28, member 2                                                                                    | 2.50E-01 | NS | 6.42E-02 | NS | 2.80E-02 | 2.2 |
| A_44_P523000  | XM_001080361 | 691960 | LOC691960  |                                                                                                                                  | 1.15E-01 | NS | 2.01E-01 | NS | 2.54E-02 | 2.2 |
| A_44_P302124  | NM_001108860 | 364134 | Tecl1      | trans-2,3-enoyl-CoA reductase-like                                                                                               | 5.08E-01 | NS | 5.08E-01 | NS | 3.20E-02 | 2.2 |
| A_44_P393064  | XM_001053715 | 304740 | Clasp1     | cytoplasmic linker associated protein 1                                                                                          | 7.97E-02 | NS | 3.57E-01 | NS | 1.65E-02 | 2.2 |
| A_44_P367779  | NM_013127    | 25668  | Cd38       | CD38 molecule                                                                                                                    | 9.80E-01 | NS | 9.49E-01 | NS | 3.37E-02 | 2.2 |
| A_44_P429041  | XM_227654    |        |            |                                                                                                                                  | 1.42E-01 | NS | 3.02E-01 | NS | 2.10E-02 | 2.2 |
| A_44_P114788  | NM_001106811 | 300475 | Adamts8    | ADAM metallopeptidase with thrombospondin type 1 motif, 8                                                                        | 1.21E-01 | NS | 9.70E-01 | NS | 3.23E-02 | 2.2 |
| A_64_P087539  | NM_001079893 | 360580 | Dusp14     | dual specificity phosphatase 14                                                                                                  | 9.21E-02 | NS | 2.07E-01 | NS | 3.44E-02 | 2.2 |
| A_44_P345013  | NM_001134715 | 363024 | Slc44a2    | solute carrier family 44, member 2                                                                                               | 6.52E-02 | NS | 1.32E-01 | NS | 4.45E-02 | 2.2 |
| A_44_P729029  | NM_001109228 | 500068 | RGD1559502 | similar to RIKEN cDNA 1700025E21                                                                                                 | 4.00E-01 | NS | 3.53E-01 | NS | 4.30E-02 | 2.2 |
| A_43_P21489   | NM_001004284 | 363139 | Zmynd10    | zinc finger, MYND-type containing 10                                                                                             | 2.68E-01 | NS | 1.40E-01 | NS | 4.27E-02 | 2.2 |

|               |              |        |            |                                                                                                                                           |          |    |          |    |          |     |
|---------------|--------------|--------|------------|-------------------------------------------------------------------------------------------------------------------------------------------|----------|----|----------|----|----------|-----|
| A_44_P1011953 | NM_198779    | 362219 | Gpcpd1     | glycerophosphocholine phosphodiesterase GDE1 homolog ( <i>S. cerevisiae</i> ) family with sequence similarity 167,                        | 5.27E-02 | NS | 1.58E-01 | NS | 2.29E-02 | 2.2 |
| A_44_P608318  | NM_001109102 | 498533 | Fam167a    | member A                                                                                                                                  | 6.19E-01 | NS | 1.04E-01 | NS | 3.85E-02 | 2.2 |
| A_44_P140244  | NM_001109536 | 689388 | Ptx3       | pentraxin related gene                                                                                                                    | 9.45E-01 | NS | 5.63E-01 | NS | 3.95E-02 | 2.2 |
| A_64_P009540  | NM_053665    | 114124 | Akap1      | A kinase (PRKA) anchor protein 1                                                                                                          | 9.21E-02 | NS | 6.60E-01 | NS | 4.40E-02 | 2.3 |
| A_44_P258912  | NM_012495    | 24189  | Aldoa      | aldolase A, fructose-bisphosphate aryl hydrocarbon receptor nuclear translocator-like                                                     | 8.77E-02 | NS | 8.45E-02 | NS | 2.89E-02 | 2.3 |
| A_64_P117345  | NM_024362    | 29657  | Arntl      | perilipin 5                                                                                                                               | 7.71E-01 | NS | 9.57E-01 | NS | 1.61E-02 | 2.3 |
| A_44_P511665  | NM_001134637 | 501283 | Plin5      | ankyrin repeat domain 35                                                                                                                  | 1.50E-01 | NS | 4.68E-01 | NS | 2.27E-02 | 2.3 |
| A_44_P548426  | XM_001063190 | 365881 | Ankrd35    | fin bud initiation factor homolog (zebrafish)                                                                                             | 5.13E-01 | NS | 1.41E-01 | NS | 1.37E-02 | 2.3 |
| A_44_P852315  | NM_001025042 | 499856 | Fibin      | Rho GTPase activating protein 11A                                                                                                         | 6.93E-01 | NS | 3.61E-01 | NS | 9.40E-04 | 2.3 |
| A_44_P389265  | XM_232181    |        |            | tissue factor pathway inhibitor 2                                                                                                         | 6.08E-02 | NS | 8.45E-02 | NS | 4.47E-02 | 2.3 |
| A_44_P525324  | NM_001168524 | 296060 | Arhgap11a  | solute carrier family 28 (sodium-coupled nucleoside transporter), member 2                                                                | 6.79E-01 | NS | 4.19E-01 | NS | 9.15E-03 | 2.3 |
| A_44_P339535  | NM_173141    | 286926 | Tfpi2      | kinase suppressor of ras 1                                                                                                                | 9.07E-01 | NS | 1.51E-01 | NS | 1.05E-02 | 2.3 |
| A_64_P157359  | NM_031664    | 60423  | Slc28a2    | achaete-scute complex homolog 2 ( <i>Drosophila</i> ) similar to glyceraldehyde-3-phosphate dehydrogenase (phosphorylating) (EC 1.2.1.12) | 9.56E-02 | NS | 6.11E-01 | NS | 1.05E-02 | 2.3 |
| A_44_P368427  | NM_001108284 | 360573 | Ksr1       |                                                                                                                                           | 1.07E-01 | NS | 1.46E-01 | NS | 3.63E-02 | 2.3 |
| A_44_P359074  | XM_234875    |        |            |                                                                                                                                           | 2.21E-01 | NS | 9.06E-02 | NS | 3.97E-02 | 2.3 |
| A_64_P023250  | NM_031503    | 24209  | Ascl2      | similar to chromosome 10 open reading frame 71                                                                                            | 8.75E-01 | NS | 1.15E-01 | NS | 4.41E-02 | 2.3 |
| A_44_P114919  | XM_221419    | 303889 | RGD1559590 | beta-gamma crystallin domain containing 3                                                                                                 | 1.24E-01 | NS | 1.19E-01 | NS | 4.49E-02 | 2.3 |
| A_64_P151332  | XM_229506    |        |            | UBA domain containing 1                                                                                                                   | 3.81E-01 | NS | 5.39E-01 | NS | 2.08E-02 | 2.3 |
| A_64_P138445  | XM_001060995 | 498579 | RGD1564899 | sema domain, immunoglobulin domain (Ig), transmembrane domain (TM) and short cytoplasmic domain, (semaphorin) 4A double C2, gamma         | 7.10E-02 | NS | 1.02E-01 | NS | 3.23E-02 | 2.3 |
| A_44_P248714  | XM_001057435 | 288204 | Crybg3     |                                                                                                                                           | 1.73E-01 | NS | 2.18E-01 | NS | 2.73E-02 | 2.3 |
| A_44_P194531  | NM_001007742 | 362087 | Ubac1      |                                                                                                                                           | 5.25E-02 | NS | 1.18E-01 | NS | 4.21E-02 | 2.3 |
| A_44_P361424  | XR_009353    |        |            |                                                                                                                                           | 5.31E-02 | NS | 8.56E-02 | NS | 2.55E-02 | 2.3 |
| A_64_P050994  | NM_001012078 | 310630 | Sema4a     | EGFR-coamplified and overexpressed protein                                                                                                | 7.18E-02 | NS | 8.70E-02 | NS | 2.18E-02 | 2.3 |
| A_44_P447810  | NM_001011937 | 293654 | Doc2g      | inositol polyphosphate-5-phosphatase B                                                                                                    | 3.29E-01 | NS | 3.73E-01 | NS | 3.77E-02 | 2.3 |
| A_44_P337969  | XM_234037    |        |            | diacylglycerol kinase zeta                                                                                                                | 1.19E-01 | NS | 7.60E-02 | NS | 4.61E-02 | 2.3 |
| A_44_P758470  | NM_001108630 | 362374 | Ecop       | centrosomal protein 76kDa                                                                                                                 | 5.79E-02 | NS | 6.08E-02 | NS | 9.70E-03 | 2.3 |
| A_44_P103160  | NM_001100755 | 362590 | Inpp5b     |                                                                                                                                           | 9.18E-01 | NS | 7.95E-02 | NS | 1.05E-02 | 2.3 |
| A_43_P12540   | NM_031143    | 81821  | Dgkz       |                                                                                                                                           | 1.52E-01 | NS | 6.99E-01 | NS | 2.41E-02 | 2.3 |
| A_44_P548502  | NM_001100514 | 291540 | Cep76      | smoothelin                                                                                                                                | 4.48E-01 | NS | 1.26E-01 | NS | 9.98E-03 | 2.3 |
| A_44_P415132  | XM_235791    |        |            | RT1 class I, locus CE5                                                                                                                    | 8.31E-02 | NS | 7.31E-01 | NS | 3.03E-02 | 2.3 |
| A_64_P165703  | NM_001013049 | 289734 | Smtn       |                                                                                                                                           | 1.06E-01 | NS | 6.82E-02 | NS | 4.44E-02 | 2.4 |
| A_64_P090474  | NM_001008843 | 309607 | RT1-CE5    |                                                                                                                                           | 1.09E-01 | NS | 2.34E-01 | NS | 3.08E-02 | 2.4 |
| A_44_P156665  | XM_218761    |        |            |                                                                                                                                           | 7.99E-02 | NS | 7.95E-02 | NS | 3.24E-02 | 2.4 |
| A_44_P372640  | NM_001170340 | 292767 | Catsperg1  | cation channel, sperm-associated, gamma 1                                                                                                 | 2.61E-01 | NS | 6.83E-01 | NS | 3.78E-02 | 2.4 |
| A_44_P268215  | NM_001110319 | 691842 | Maz        | MYC-associated zinc finger protein (purine-binding transcription factor)                                                                  | 1.18E-01 | NS | 8.00E-01 | NS | 1.85E-02 | 2.4 |
| A_44_P930585  | NM_001106577 | 296762 | Phtf2      | putative homeodomain transcription factor 2                                                                                               | 1.03E-01 | NS | 2.00E-01 | NS | 2.91E-02 | 2.4 |
| A_44_P308687  | NM_181389    | 353233 | Nsmaf      | neutral sphingomyelinase (N-SMase)                                                                                                        | 9.51E-02 | NS | 7.95E-01 | NS | 2.02E-02 | 2.4 |
| A_43_P12819   | NM_053480    | 85242  | Pola2      | activation associated factor polymerase (DNA directed), alpha 2                                                                           | 1.05E-01 | NS | 2.53E-01 | NS | 2.21E-02 | 2.4 |
| A_64_P037279  | NM_001134798 | 688913 | Dcun1d2    | DCN1, defective in cullin neddylation 1, domain containing 2 ( <i>S. cerevisiae</i> )                                                     | 1.57E-01 | NS | 3.77E-01 | NS | 2.42E-02 | 2.4 |
| A_44_P243238  | NM_013177    | 25721  | Got2       | glutamic-oxaloacetic transaminase 2, mitochondrial (aspartate aminotransferase 2)                                                         | 8.65E-02 | NS | 1.97E-01 | NS | 2.61E-02 | 2.4 |



|               |              |           |              |                                                                                                                |          |    |          |    |          |     |
|---------------|--------------|-----------|--------------|----------------------------------------------------------------------------------------------------------------|----------|----|----------|----|----------|-----|
| A_44_P480852  | NM_001106780 | 299737    | RGD1565947   | similar to netrin 4                                                                                            | 3.54E-01 | NS | 6.07E-01 | NS | 2.95E-02 | 2.4 |
| A_44_P480801  | NM_001013943 | 299052    | Aldoa1       | aldolase A-like 1                                                                                              | 6.25E-02 | NS | 6.11E-02 | NS | 2.49E-02 | 2.4 |
| A_64_P096121  | XM_001061110 |           |              |                                                                                                                | 1.73E-01 | NS | 1.17E-01 | NS | 1.51E-02 | 2.4 |
| A_44_P549998  | NM_001004207 | 288923    | Dhps         | deoxyhypusine synthase                                                                                         | 2.92E-01 | NS | 9.03E-01 | NS | 5.20E-03 | 2.4 |
| A_42_P516693  | NM_001107330 | 306655    | Irx4         | iroquois homeobox 4<br>UDP glucuronosyltransferase 1 family,<br>polypeptide A6                                 | 9.10E-01 | NS | 8.30E-01 | NS | 3.56E-02 | 2.4 |
| A_64_P025630  | NM_001039691 | 113992    | Ugt1a6       | polypeptide A6                                                                                                 | 6.59E-02 | NS | 2.12E-01 | NS | 4.01E-02 | 2.4 |
| A_44_P358235  | NM_020542    | 57301     | Ccr1         | chemokine (C-C motif) receptor 1                                                                               | 7.10E-01 | NS | 9.72E-01 | NS | 5.56E-03 | 2.4 |
| A_44_P510442  | NM_181080    | 288596    | Trim50       | tripartite motif-containing 50                                                                                 | 3.62E-01 | NS | 3.33E-01 | NS | 2.48E-02 | 2.4 |
| A_42_P556829  | NM_053738    | 114557    | Wif1         | Wnt inhibitory factor 1                                                                                        | 5.99E-02 | NS | 8.21E-01 | NS | 1.38E-03 | 2.4 |
| A_44_P328535  | XM_342556    |           |              |                                                                                                                | 1.02E-01 | NS | 1.56E-01 | NS | 3.19E-02 | 2.4 |
| A_64_P053336  | XM_002726560 | 100366132 | LOC100366132 | Glyceraldehyde-3-phosphate<br>dehydrogenase-like                                                               | 1.19E-01 | NS | 7.69E-02 | NS | 3.06E-02 | 2.4 |
| A_64_P059485  | NM_080906    | 140942    | Ddit4        | DNA-damage-inducible transcript 4                                                                              | 1.63E-01 | NS | 6.93E-01 | NS | 1.80E-02 | 2.4 |
| A_44_P124074  | XM_217067    |           |              |                                                                                                                | 1.23E-01 | NS | 1.01E-01 | NS | 4.02E-02 | 2.4 |
| A_42_P740370  | NM_001106306 | 293566    | Cpxm2        | carboxypeptidase X (M14 family), member<br>2                                                                   | 3.12E-01 | NS | 1.39E-01 | NS | 3.04E-02 | 2.5 |
| A_43_P23215   | NM_001025737 | 362619    | Smpdl3b      | sphingomyelin phosphodiesterase, acid-like<br>3B                                                               | 1.28E-01 | NS | 6.79E-01 | NS | 4.69E-02 | 2.5 |
| A_64_P159175  | NM_001108544 | 361886    | Adamts6      | ADAM metalloproteinase with<br>thrombospondin type 1 motif, 6                                                  | 7.75E-01 | NS | 7.24E-01 | NS | 1.63E-02 | 2.5 |
| A_64_P153482  | NM_001107306 | 306352    | Armc6        | armadillo repeat containing 6                                                                                  | 1.67E-01 | NS | 3.57E-01 | NS | 2.93E-02 | 2.5 |
| A_64_P054586  | NM_001135893 | 363445    | Usp9x        | ubiquitin specific peptidase 9, X-linked                                                                       | 2.64E-01 | NS | 8.55E-01 | NS | 2.66E-02 | 2.5 |
| A_43_P21910   | NM_001047861 | 296619    | Pkn3         | protein kinase N3                                                                                              | 1.19E-01 | NS | 4.25E-01 | NS | 2.98E-02 | 2.5 |
| A_64_P032323  | NM_022630    | 64565     | Tmprss11d    | transmembrane protease, serine 11d                                                                             | 5.97E-01 | NS | 8.79E-02 | NS | 4.89E-02 | 2.5 |
| A_44_P536125  | NM_053557    | 89820     | Prmt3        | protein arginine methyltransferase 3                                                                           | 5.57E-01 | NS | 2.95E-01 | NS | 2.32E-02 | 2.5 |
| A_44_P413701  | NM_031151    | 81829     | Mdh2         | malate dehydrogenase 2, NAD<br>(mitochondrial)                                                                 | 6.50E-02 | NS | 1.79E-01 | NS | 2.42E-02 | 2.5 |
| A_64_P056124  | XR_007312    |           |              |                                                                                                                | 6.95E-01 | NS | 8.10E-02 | NS | 3.15E-02 | 2.5 |
| A_44_P1014659 | NM_001114180 | 314260    | Plek2        | pleckstrin 2                                                                                                   | 1.58E-01 | NS | 1.88E-01 | NS | 4.89E-02 | 2.5 |
| A_43_P12927   | NM_053769    | 114856    | Dusp1        | dual specificity phosphatase 1<br>family with sequence similarity 19                                           | 9.12E-02 | NS | 2.94E-01 | NS | 3.81E-02 | 2.5 |
| A_64_P073580  | XM_002726967 | 500915    | Fam19a5      | (chemokine (C-C motif)-like), member A5<br>phosphoinositide-3-kinase, catalytic, delta<br>polypeptide          | 8.17E-02 | NS | 8.06E-01 | NS | 1.94E-02 | 2.5 |
| A_44_P956502  | NM_001108978 | 366508    | Pik3cd       | v-maf musculoaponeurotic fibrosarcoma<br>oncogene homolog K (avian)                                            | 9.37E-02 | NS | 7.41E-01 | NS | 8.78E-03 | 2.5 |
| A_43_P10581   | NM_145673    | 246760    | Mafk         | family with sequence similarity 111,<br>member A                                                               | 1.27E-01 | NS | 2.60E-01 | NS | 1.12E-02 | 2.6 |
| A_44_P304009  | NM_001109163 | 499322    | Fam111a      | ankyrin repeat and SOCS box-containing<br>16                                                                   | 1.76E-01 | NS | 4.77E-01 | NS | 1.72E-02 | 2.6 |
| A_64_P003234  | NM_001109048 | 498005    | Asb16        | CAP-GLY domain containing linker protein<br>family, member 4                                                   | 7.20E-02 | NS | 5.29E-02 | NS | 3.33E-02 | 2.6 |
| A_43_P23317   | NM_001013942 | 298801    | Clip4        | family, member 4                                                                                               | 6.02E-02 | NS | 1.64E-01 | NS | 4.60E-02 | 2.6 |
| A_43_P12890   | NM_053665    | 114124    | Akap1        | A kinase (PRKA) anchor protein 1                                                                               | 5.58E-02 | NS | 8.44E-01 | NS | 3.99E-02 | 2.6 |
| A_44_P372839  | XM_001077739 | 362044    | Cenpe        | centromere protein E                                                                                           | 2.00E-01 | NS | 1.88E-01 | NS | 1.62E-02 | 2.6 |
| A_43_P21963   | XR_005455    |           |              |                                                                                                                | 8.26E-01 | NS | 9.28E-01 | NS | 1.31E-02 | 2.6 |
| A_44_P227121  | XM_001072487 | 361025    | Txndc16      | thioredoxin domain containing 16<br>similar to glyceraldehyde-3-phosphate<br>dehydrogenase                     | 6.36E-01 | NS | 7.78E-01 | NS | 4.15E-02 | 2.6 |
| A_44_P492509  | XR_009063    | 299622    | RGD1560581   | dehydrogenase                                                                                                  | 9.26E-02 | NS | 6.65E-02 | NS | 3.09E-02 | 2.6 |
| A_43_P17298   | NM_001010967 | 497009    | Naaa         | N-acylethanolamine acid amidase                                                                                | 2.30E-01 | NS | 9.86E-01 | NS | 1.98E-02 | 2.6 |
| A_64_P087054  | NM_001108495 | 361615    | Relt         | RELT tumor necrosis factor receptor<br>like-glycosyltransferase                                                | 1.35E-01 | NS | 8.89E-02 | NS | 1.94E-02 | 2.6 |
| A_44_P274491  | NM_001108439 | 361368    | Large        | like-glycosyltransferase                                                                                       | 1.68E-01 | NS | 9.61E-01 | NS | 1.88E-02 | 2.6 |
| A_64_P024020  | NM_001107460 | 308126    | Zbtb2        | zinc finger and BTB domain containing 2                                                                        | 6.02E-02 | NS | 1.43E-01 | NS | 4.70E-03 | 2.6 |
| A_44_P445318  | XM_215985    |           |              |                                                                                                                | 3.76E-01 | NS | 8.25E-02 | NS | 7.71E-03 | 2.7 |
| A_64_P071692  | NM_019325    | 360543    | Myh4         | myosin, heavy chain 4, skeletal muscle<br>BRCA1 associated protein-1 (ubiquitin<br>carboxy-terminal hydrolase) | 1.51E-01 | NS | 9.81E-02 | NS | 4.00E-02 | 2.7 |
| A_44_P217821  | NM_001107292 | 306257    | Bap1         | similar to fatty aldehyde dehydrogenase-<br>like                                                               | 1.53E-01 | NS | 4.75E-01 | NS | 3.50E-02 | 2.7 |
| A_64_P004598  | XM_001068253 | 688778    | LOC688778    | like                                                                                                           | 1.19E-01 | NS | 7.58E-01 | NS | 2.71E-02 | 2.7 |

|              |              |        |            |                                                                                                                                               |          |    |          |    |          |     |
|--------------|--------------|--------|------------|-----------------------------------------------------------------------------------------------------------------------------------------------|----------|----|----------|----|----------|-----|
| A_44_P485246 | XM_231092    |        |            |                                                                                                                                               | 1.10E-01 | NS | 5.89E-01 | NS | 2.65E-02 | 2.7 |
| A_44_P520136 | XM_001071249 | 259273 | Kcnq5l     | potassium voltage-gated channel, subfamily Q, member 5-like                                                                                   | 9.33E-02 | NS | 2.03E-01 | NS | 9.13E-03 | 2.7 |
| A_64_P098996 | XM_001059604 | 305386 | Tapt1      | transmembrane anterior posterior transformation 1                                                                                             | 2.90E-01 | NS | 6.45E-01 | NS | 1.09E-02 | 2.8 |
| A_64_P113301 | XM_001054511 |        |            |                                                                                                                                               | 6.01E-01 | NS | 5.46E-01 | NS | 1.13E-02 | 2.8 |
| A_44_P412265 | NM_013028    | 25546  | Shox2      | short stature homeobox 2                                                                                                                      | 8.28E-01 | NS | 3.11E-01 | NS | 4.19E-03 | 2.8 |
| A_44_P428326 | NM_173094    | 24450  | Hmgcs2     | 3-hydroxy-3-methylglutaryl-Coenzyme A synthase 2 (mitochondrial)                                                                              | 5.23E-01 | NS | 7.12E-01 | NS | 2.89E-02 | 2.8 |
| A_42_P498273 | NM_017033    | 24645  | Pgm1       | phosphoglucomutase 1                                                                                                                          | 5.55E-02 | NS | 1.04E-01 | NS | 4.49E-02 | 2.8 |
| A_64_P042495 | NM_001109127 | 498922 | Cbln1      | cerebellin 1 precursor                                                                                                                        | 6.19E-01 | NS | 1.55E-01 | NS | 1.94E-02 | 2.8 |
| A_43_P23097  | NM_001011965 | 296655 | Stom       | stomatin                                                                                                                                      | 1.42E-01 | NS | 4.42E-01 | NS | 3.55E-02 | 2.8 |
| A_64_P099094 | NM_001012275 | 316005 | Arih2      | ariadne homolog 2 (Drosophila)                                                                                                                | 7.98E-02 | NS | 3.87E-01 | NS | 2.56E-02 | 2.8 |
| A_44_P419922 | NM_001013114 | 302995 | Haghl      | hydroxyacylglutathione hydrolase-like                                                                                                         | 8.08E-01 | NS | 4.23E-01 | NS | 2.01E-02 | 2.8 |
| A_64_P054979 | NM_001109615 | 690987 | Gys1       | glycogen synthase 1, muscle                                                                                                                   | 6.59E-02 | NS | 1.52E-01 | NS | 1.73E-02 | 2.8 |
| A_64_P063886 | XM_002725125 |        |            |                                                                                                                                               | 1.92E-01 | NS | 5.37E-01 | NS | 3.22E-02 | 2.8 |
| A_64_P056648 | NM_001106074 | 290655 | Crif1      | cytokine receptor-like factor 1                                                                                                               | 5.14E-02 | NS | 8.66E-02 | NS | 1.48E-02 | 2.8 |
| A_44_P914438 | NM_080782    | 114851 | Cdkn1a     | cyclin-dependent kinase inhibitor 1A                                                                                                          | 8.50E-01 | NS | 5.53E-01 | NS | 2.72E-02 | 2.8 |
| A_64_P084058 | BC166431     | 685125 | LOC685125  | similar to RIKEN cDNA 5031410106                                                                                                              | 7.45E-01 | NS | 5.78E-02 | NS | 1.62E-02 | 2.9 |
| A_43_P18902  | NM_001109221 | 500034 | LOC500034  | similar to CG3570-PA                                                                                                                          | 4.13E-01 | NS | 2.57E-01 | NS | 1.31E-03 | 2.9 |
| A_44_P291728 | XM_001065955 | 84015  | Ttn        | titin                                                                                                                                         | 5.80E-02 | NS | 1.03E-01 | NS | 3.39E-02 | 2.9 |
| A_64_P012278 | NM_053959    | 117028 | Bin1       | bridging integrator 1                                                                                                                         | 6.67E-02 | NS | 1.12E-01 | NS | 4.48E-02 | 2.9 |
| A_43_P12593  | NM_031573    | 29353  | Phkg1      | phosphorylase kinase, gamma 1                                                                                                                 | 5.87E-02 | NS | 7.02E-02 | NS | 4.72E-02 | 2.9 |
| A_44_P874677 | NM_001007738 | 361744 | RGD1359349 | similar to hypothetical protein MGC34760                                                                                                      | 5.66E-01 | NS | 5.22E-01 | NS | 1.06E-02 | 2.9 |
| A_44_P303982 | NM_001106381 | 294335 | Susd2      | sushi domain containing 2                                                                                                                     | 6.77E-01 | NS | 3.10E-01 | NS | 1.53E-02 | 2.9 |
| A_44_P140514 | NM_001106711 | 298850 | Cenpa      | centromere protein A                                                                                                                          | 2.71E-01 | NS | 1.19E-01 | NS | 1.12E-02 | 2.9 |
| A_44_P391926 | NM_001114405 | 362930 | Ptp4a3     | protein tyrosine phosphatase 4a3                                                                                                              | 6.09E-02 | NS | 9.11E-02 | NS | 2.32E-02 | 3.0 |
| A_44_P858398 | NM_001017485 | 498145 | LOC498145  | similar to RIKEN cDNA 2810453106                                                                                                              | 9.59E-01 | NS | 8.38E-01 | NS | 4.49E-02 | 3.0 |
| A_44_P639365 | XM_575056    | 499723 | Col24a1    | collagen, type XXIV, alpha 1                                                                                                                  | 1.69E-01 | NS | 1.22E-01 | NS | 2.96E-02 | 3.0 |
| A_43_P22484  | XM_222180    |        |            |                                                                                                                                               | 8.37E-01 | NS | 2.75E-01 | NS | 4.46E-02 | 3.0 |
| A_64_P098549 | XR_005447    | 501224 | LOC501224  | similar to RIKEN cDNA 2610042L04                                                                                                              | 8.25E-02 | NS | 2.28E-01 | NS | 5.79E-03 | 3.0 |
| A_64_P013753 | CX569749     | 498924 | RGD1565104 | similar to Discs, large homolog 5 (Placenta and prostate DLG)                                                                                 | 2.46E-01 | NS | 4.89E-01 | NS | 3.10E-02 | 3.1 |
| A_44_P260055 | NM_031043    | 81675  | Gyg1       | glycogenin 1                                                                                                                                  | 5.98E-02 | NS | 1.51E-01 | NS | 1.73E-02 | 3.1 |
| A_44_P153789 | NM_172009    | 83817  | Ache       | acetylcholinesterase                                                                                                                          | 1.13E-01 | NS | 6.81E-02 | NS | 3.53E-02 | 3.1 |
| A_44_P523853 | NM_012638    | 24701  | Pygm       | phosphorylase, glycogen, muscle                                                                                                               | 9.04E-02 | NS | 8.48E-02 | NS | 2.89E-02 | 3.1 |
| A_64_P064120 | XM_001064406 | 685580 | LOC685580  | hypothetical protein LOC685580                                                                                                                | 6.31E-02 | NS | 1.48E-01 | NS | 3.07E-02 | 3.1 |
| A_44_P231457 | NM_173095    | 24520  | Kcna1      | potassium voltage-gated channel, shaker-related subfamily, member 1                                                                           | 1.81E-01 | NS | 6.74E-01 | NS | 4.08E-02 | 3.2 |
| A_64_P138236 | NM_001100827 | 257649 | Cenpf      | centromere protein F                                                                                                                          | 9.11E-01 | NS | 1.96E-01 | NS | 1.04E-02 | 3.2 |
| A_64_P137609 | FQ230487     |        |            |                                                                                                                                               | 6.83E-02 | NS | 2.41E-01 | NS | 1.87E-02 | 3.2 |
| A_64_P003610 | NM_057209    | 117558 | Mylk2      | myosin light chain kinase 2                                                                                                                   | 6.50E-02 | NS | 7.20E-02 | NS | 2.77E-02 | 3.2 |
| A_64_P074102 | XM_001066411 | 116466 | Wnt2b      | wingless-type MMTV integration site family, member 2B                                                                                         | 3.20E-01 | NS | 6.97E-01 | NS | 1.03E-02 | 3.2 |
| A_44_P560973 | NM_001100640 | 192362 | Lamc2      | laminin, gamma 2                                                                                                                              | 2.58E-01 | NS | 6.76E-01 | NS | 3.78E-02 | 3.2 |
| A_44_P355073 | XM_001072867 | 684425 | LOC684425  | similar to Adenylosuccinate synthetase isozyme 1 (Adenylosuccinate synthetase, muscle isozyme) (IMP--aspartate ligase 1) (AdSS 1) (AMPSase 1) | 5.20E-02 | NS | 8.97E-02 | NS | 3.22E-02 | 3.2 |
| A_44_P459918 | NM_001025411 | 300721 | Dnaja4     | DnaJ (Hsp40) homolog, subfamily A, member 4                                                                                                   | 5.27E-02 | NS | 1.80E-01 | NS | 3.14E-02 | 3.2 |
| A_44_P381270 | NM_001109086 | 501195 | RGD1562136 | similar to D1Ert622e protein                                                                                                                  | 2.86E-01 | NS | 7.05E-01 | NS | 3.17E-02 | 3.2 |
| A_44_P231223 | NM_201989    | 311098 | Xirp2      | xin actin-binding repeat containing 2                                                                                                         | 7.67E-02 | NS | 6.84E-02 | NS | 3.46E-02 | 3.2 |
| A_44_P225299 | XM_340807    | 287353 | Obscnl     | obscurin, cytoskeletal calmodulin and titin-interacting RhoGEF-like                                                                           | 1.03E-01 | NS | 1.12E-01 | NS | 4.92E-02 | 3.3 |
| A_44_P932543 | NM_001107284 | 306152 | Slitrk5    | SLIT and NTRK-like family, member 5                                                                                                           | 6.57E-02 | NS | 4.71E-01 | NS | 2.76E-02 | 3.3 |
| A_43_P19706  | NM_001107325 | 291245 | Actn2      | actinin alpha 2                                                                                                                               | 7.95E-02 | NS | 1.21E-01 | NS | 4.55E-02 | 3.3 |
| A_43_P23319  | NM_001107665 | 310306 | Usp13      | ubiquitin specific protease 13 (isopeptidase T-3)                                                                                             | 1.02E-01 | NS | 1.41E-01 | NS | 4.36E-02 | 3.3 |
| A_44_P354302 | NM_001013217 | 362708 | Trim54     | tripartite motif-containing 54                                                                                                                | 8.00E-02 | NS | 1.47E-01 | NS | 3.76E-02 | 3.3 |

|              |              |        |            |                                                                                                                         |          |    |          |    |          |      |
|--------------|--------------|--------|------------|-------------------------------------------------------------------------------------------------------------------------|----------|----|----------|----|----------|------|
| A_44_P116283 | NM_057191    | 117537 | Kbtbd10    | kelch repeat and BTB (POZ) domain containing 10                                                                         | 5.38E-02 | NS | 8.38E-02 | NS | 4.25E-02 | 3.4  |
| A_64_P012846 | XM_346161    |        |            |                                                                                                                         | 3.31E-01 | NS | 1.81E-01 | NS | 3.85E-02 | 3.4  |
| A_44_P178108 | XM_001067026 | 307056 | Anln       | anillin, actin binding protein                                                                                          | 3.73E-01 | NS | 2.60E-01 | NS | 1.24E-02 | 3.4  |
| A_64_P024077 | NM_053297    | 25630  | Pkm2       | pyruvate kinase, muscle                                                                                                 | 1.08E-01 | NS | 5.87E-02 | NS | 3.80E-02 | 3.4  |
| A_44_P405066 | NM_017288    | 29686  | Scn1b      | sodium channel, voltage-gated, type I, beta                                                                             | 5.65E-02 | NS | 1.03E-01 | NS | 1.82E-02 | 3.5  |
| A_64_P159977 | XM_001072194 | 295162 | Tigd4      | tigger transposable element derived 4                                                                                   | 4.27E-01 | NS | 8.40E-01 | NS | 1.83E-02 | 3.5  |
| A_64_P163244 | XM_001054975 | 316740 | Myom1      | myomesin 1                                                                                                              | 5.76E-02 | NS | 7.28E-02 | NS | 2.73E-02 | 3.6  |
| A_64_P120445 | NM_080694    | 140727 | Cacng6     | calcium channel, voltage-dependent, gamma subunit 6                                                                     | 7.21E-02 | NS | 7.40E-02 | NS | 3.44E-02 | 3.6  |
| A_44_P173138 | NM_001129997 | 309169 | Ehbp11     | EH domain binding protein 1-like 1                                                                                      | 7.02E-02 | NS | 1.25E-01 | NS | 3.34E-02 | 3.7  |
| A_43_P12211  | NM_022382    | 64183  | Pde4dip    | phosphodiesterase 4D interacting protein                                                                                | 5.84E-02 | NS | 9.44E-02 | NS | 2.49E-02 | 3.7  |
| A_44_P898195 | NM_001134604 | 498392 | Cyt1       | cytokine like 1                                                                                                         | 1.76E-01 | NS | 1.97E-01 | NS | 4.28E-02 | 3.9  |
| A_64_P162589 | NM_153625    | 266733 | Slc12a8    | solute carrier family 12 (potassium/chloride transporters), member 8                                                    | 9.32E-01 | NS | 2.19E-01 | NS | 1.02E-02 | 4.0  |
| A_44_P316364 | NM_001077675 | 365377 | Trim72     | tripartite motif-containing 72                                                                                          | 1.81E-01 | NS | 1.42E-01 | NS | 3.21E-02 | 4.0  |
| A_44_P189696 | XM_001064803 |        |            |                                                                                                                         | 8.81E-01 | NS | 7.84E-01 | NS | 1.91E-03 | 4.1  |
| A_44_P170874 | XM_001079895 | 294093 | Ankrd22    | ankyrin repeat domain 22                                                                                                | 6.05E-01 | NS | 2.21E-01 | NS | 2.48E-02 | 4.1  |
| A_44_P415274 | XM_001070422 | 363790 | Fbxo40     | F-box protein 40                                                                                                        | 6.41E-02 | NS | 7.18E-02 | NS | 4.67E-02 | 4.2  |
| A_44_P241139 | XM_001068253 | 688778 | LOC688778  | similar to fatty aldehyde dehydrogenase-like                                                                            | 5.96E-01 | NS | 2.33E-01 | NS | 2.65E-02 | 4.3  |
| A_64_P138959 | XM_001056326 | 308064 | Cep72      | centrosomal protein 72kDa                                                                                               | 6.60E-02 | NS | 2.86E-01 | NS | 4.01E-03 | 4.3  |
| A_44_P377886 | XM_001053796 |        |            |                                                                                                                         | 9.41E-02 | NS | 2.64E-01 | NS | 2.25E-02 | 4.4  |
| A_44_P390700 | NM_031677    | 63839  | Fhl2       | four and a half LIM domains 2                                                                                           | 1.04E-01 | NS | 8.65E-01 | NS | 4.56E-03 | 4.4  |
| A_64_P072648 | NM_019334    | 54284  | Pitx2      | paired-like homeodomain 2                                                                                               | 5.92E-02 | NS | 5.11E-02 | NS | 7.51E-03 | 4.4  |
| A_44_P181039 | NM_022626    | 64561  | Phka1      | phosphorylase kinase, alpha 1                                                                                           | 1.87E-01 | NS | 1.14E-01 | NS | 9.98E-03 | 4.5  |
| A_64_P024424 | NM_001108807 | 314771 | Kera       | keratocan                                                                                                               | 2.98E-01 | NS | 5.17E-02 | NS | 1.40E-02 | 4.5  |
| A_44_P241308 | XM_002725321 |        |            |                                                                                                                         | 2.55E-01 | NS | 8.62E-01 | NS | 6.73E-03 | 4.5  |
| A_44_P465233 | NM_022603    | 64535  | Fgfbp1     | fibroblast growth factor binding protein 1                                                                              | 7.77E-01 | NS | 9.29E-02 | NS | 2.90E-02 | 4.6  |
| A_64_P232269 | NM_001099458 | 308248 | Vom2r4     | vomeroneasal 2 receptor, 4                                                                                              | 1.59E-01 | NS | 1.35E-01 | NS | 3.98E-02 | 4.6  |
| A_44_P447373 | NM_013157    | 25698  | Ass1       | argininosuccinate synthetase 1                                                                                          | 3.98E-01 | NS | 8.76E-01 | NS | 4.68E-03 | 4.7  |
| A_64_P002814 | NM_001106690 | 298555 | Grlh3      | grainyhead-like 3 (Drosophila)                                                                                          | 9.57E-02 | NS | 7.20E-01 | NS | 4.84E-02 | 4.8  |
| A_43_P22288  | XM_001068814 | 688915 | Cmya5      | cardiomyopathy associated 5                                                                                             | 6.89E-02 | NS | 1.31E-01 | NS | 3.40E-02 | 4.8  |
| A_64_P116299 | XM_001081221 | 501296 | LOC501296  | hypothetical gene 1 supported by BC059164                                                                               | 7.18E-01 | NS | 9.08E-01 | NS | 4.99E-02 | 5.0  |
| A_64_P131826 | XM_001078623 |        |            |                                                                                                                         | 4.54E-01 | NS | 2.90E-01 | NS | 2.39E-02 | 5.0  |
| A_44_P227243 | NM_001108582 | 362136 | Dapl1      | death associated protein-like 1                                                                                         | 3.80E-01 | NS | 7.70E-01 | NS | 3.46E-02 | 5.0  |
| A_44_P991335 | NM_001109380 | 679870 | Capns2     | calpain, small subunit 2                                                                                                | 6.28E-01 | NS | 2.15E-01 | NS | 4.81E-02 | 5.6  |
| A_64_P094423 | NM_001106934 | 302328 | Pof1b      | premature ovarian failure 1B                                                                                            | 9.65E-01 | NS | 7.54E-01 | NS | 4.38E-02 | 5.7  |
| A_44_P638511 | NM_001014092 | 315741 | Paqr5      | progesterin and adipoQ receptor family member V                                                                         | 8.85E-01 | NS | 1.19E-01 | NS | 1.19E-02 | 5.7  |
| A_44_P563447 | NM_001108227 | 316527 | Wnt10a     | wingless-type MMTV integration site family, member 10A                                                                  | 5.40E-02 | NS | 5.86E-02 | NS | 4.77E-02 | 5.8  |
| A_64_P081939 | XR_007793    |        |            |                                                                                                                         | 2.96E-01 | NS | 9.56E-02 | NS | 7.90E-03 | 6.0  |
| A_44_P461130 | NM_183333    | 369017 | Krt5       | keratin 5                                                                                                               | 9.37E-01 | NS | 6.11E-01 | NS | 2.94E-02 | 6.3  |
| A_42_P665039 | NM_001106366 | 294027 | Col17a1    | collagen, type XVII, alpha 1                                                                                            | 6.74E-02 | NS | 5.14E-01 | NS | 4.88E-02 | 6.3  |
| A_43_P15281  | NM_019221    | 246334 | Tp63       | tumor protein p63                                                                                                       | 5.99E-01 | NS | 3.04E-01 | NS | 4.97E-02 | 6.9  |
| A_64_P068714 | XM_344557    | 364653 | LOC364653  | similar to WD repeat domain 17                                                                                          | 6.42E-01 | NS | 2.43E-01 | NS | 1.86E-02 | 7.2  |
| A_64_P134717 | NM_001101007 | 683313 | LOC683313  | similar to keratin complex 2, basic, gene 6a                                                                            | 6.42E-01 | NS | 9.38E-01 | NS | 4.76E-02 | 7.3  |
| A_64_P029980 | NM_001107181 | 304822 | Pkp1       | plakophilin 1                                                                                                           | 7.90E-01 | NS | 1.71E-01 | NS | 4.79E-02 | 8.5  |
| A_64_P109854 | XM_002726225 | 295714 | RGD1311224 | similar to fatty acid desaturase 2; linoleoyl-CoA desaturase (delta-6-desaturase)-like 2; delta-6 fatty acid desaturase | 3.13E-01 | NS | 9.61E-02 | NS | 4.16E-02 | 8.5  |
| A_64_P150884 | NM_001108388 | 361086 | Scel       | sciellin                                                                                                                | 6.47E-01 | NS | 2.83E-01 | NS | 1.86E-02 | 9.8  |
| A_64_P105389 | NM_001008806 | 315323 | Krt4       | keratin 4                                                                                                               | 6.44E-01 | NS | 8.71E-02 | NS | 3.95E-02 | 10.2 |
| A_44_P478144 | NM_001106063 | 290595 | LOC290595  | hypothetical gene supported by AF152002                                                                                 | 3.74E-01 | NS | 1.88E-01 | NS | 4.33E-02 | 10.9 |

|               |              |        |            |                                                                                                                         |          |    |          |    |          |      |
|---------------|--------------|--------|------------|-------------------------------------------------------------------------------------------------------------------------|----------|----|----------|----|----------|------|
| A_64_P019851  | XM_002726225 | 295714 | RGD1311224 | similar to fatty acid desaturase 2; linoleoyl-CoA desaturase (delta-6-desaturase)-like 2; delta-6 fatty acid desaturase | 2.87E-01 | NS | 1.75E-01 | NS | 3.40E-02 | 11.6 |
| A_64_P140148  | XR_007793    |        |            |                                                                                                                         | 1.87E-01 | NS | 7.59E-02 | NS | 6.41E-03 | 12.0 |
| A_44_P201201  | XM_002725875 | 25681  | Col10a1    | collagen, type X, alpha 1                                                                                               | 9.29E-02 | NS | 1.18E-01 | NS | 3.54E-02 | 12.2 |
| A_44_P1026260 | NM_057108    | 116589 | Serpib5    | serine (or cysteine) peptidase inhibitor, clade B, member 5                                                             | 5.66E-02 | NS | 9.92E-01 | NS | 3.49E-02 | 15.2 |
| A_44_P438272  | NM_022859    | 64827  | Crisp1     | cysteine-rich secretory protein 1                                                                                       | 1.85E-01 | NS | 1.53E-01 | NS | 2.61E-02 | 15.4 |
| A_64_P046288  | NM_001002290 | 432393 | Kprp       | keratinocyte proline-rich protein                                                                                       | 8.88E-01 | NS | 7.98E-02 | NS | 2.91E-02 | 16.8 |
| A_64_P134075  | NM_001101007 | 683313 | LOC683313  | similar to keratin complex 2, basic, gene 6a                                                                            | 5.55E-01 | NS | 2.11E-01 | NS | 4.78E-02 | 21.0 |
| A_44_P1004757 | NM_153733    | 266775 | Serpib10   | serine (or cysteine) peptidase inhibitor, clade B (ovalbumin), member 10                                                | 5.67E-01 | NS | 4.20E-01 | NS | 2.57E-02 | 21.3 |
| A_42_P471653  | NM_001031654 | 306283 | Anxa8      | annexin A8                                                                                                              | 6.02E-01 | NS | 6.41E-01 | NS | 1.15E-02 | 21.5 |
| A_44_P196849  | XM_344627    | 364774 | Calm4      | calmodulin 4                                                                                                            | 4.56E-01 | NS | 7.16E-02 | NS | 2.36E-02 | 22.9 |
| A_44_P499003  | NM_001135867 | 304692 | Serpib12   | serine (or cysteine) peptidase inhibitor, clade B (ovalbumin), member 12                                                | 2.14E-01 | NS | 1.38E-01 | NS | 4.40E-02 | 28.3 |
| A_64_P115536  | NM_212545    | 287702 | Krt17      | keratin 17                                                                                                              | 5.11E-01 | NS | 5.20E-01 | NS | 5.98E-03 | 28.4 |
| A_64_P008246  | NM_001105877 | 288075 | Stfa3      | stefin A3                                                                                                               | 1.87E-01 | NS | 1.13E-01 | NS | 2.24E-02 | 29.5 |
| A_42_P464974  | NM_001130552 | 315075 | Ly6d       | lymphocyte antigen 6 complex, locus D                                                                                   | 8.58E-01 | NS | 3.30E-01 | NS | 3.13E-02 | 54.4 |

NS: Not Significantly regulated. A negative fold change indicates gene is down-regulated and a positive fold change indicates gene is up-regulated.

MN (male, night group); FN (female, night group); FM (female, morning group).

**Table SI-2. Sub-Network Cell Processes (Top 100 pathways) for animals sampled at night**

**A. Male rats sampled at night**

| Type    | Total # of | Overlap | Percent | Gene Set Seed          | Overlapping Entities | p-value  | #  |
|---------|------------|---------|---------|------------------------|----------------------|----------|----|
| Pathway | 6179       | 324     | 5       | Cell proliferation     | CCDC154,HBEGF,AQP    | 8.30E-14 | 1  |
| Pathway | 5424       | 284     | 5       | cell differentiation   | TET2,HBEGF,AQP4,SL   | 1.99E-11 | 2  |
| Pathway | 5852       | 296     | 5       | Apoptosis              | SH3RF2,HBEGF,AQP4,   | 3.40E-10 | 3  |
| Pathway | 3544       | 199     | 5       | cell death             | HBEGF,AQP4,SLC4A1,   | 4.93E-10 | 4  |
| Pathway | 2674       | 156     | 5       | cell migration         | HBEGF,AQP4,AQP1,PT   | 6.31E-09 | 5  |
| Pathway | 2094       | 127     | 6       | Vascularization        | HBEGF,SLC4A1,AQP1,   | 2.74E-08 | 6  |
| Pathway | 3935       | 207     | 5       | cell growth            | HBEGF,AQP1,PTHLH,N   | 5.02E-08 | 7  |
| Pathway | 3401       | 183     | 5       | cell cycle             | HBEGF,AQP4,SLC4A1,   | 9.18E-08 | 8  |
| Pathway | 1278       | 83      | 6       | pregnancy              | HBEGF,SLC4A1,AQP1,   | 7.28E-07 | 9  |
| Pathway | 1445       | 91      | 6       | oxidative stress       | HBEGF,NPY,POMC,HSI   | 7.59E-07 | 10 |
| Pathway | 489        | 41      | 8       | contractile activity   | PTHLH,NPY,POMC,HSI   | 1.65E-06 | 11 |
| Pathway | 2459       | 136     | 5       | cell survival          | HBEGF,PTHLH,POMC,I   | 1.73E-06 | 12 |
| Pathway | 2068       | 118     | 5       | endocytosis            | HBEGF,AQP4,SLC4A1,   | 2.26E-06 | 13 |
| Pathway | 1809       | 105     | 5       | cell adhesion          | HBEGF,AQP4,SLC4A1,   | 4.34E-06 | 14 |
| Pathway | 695        | 51      | 7       | heart function         | HBEGF,PTHLH,NPY,PC   | 4.58E-06 | 15 |
| Pathway | 229        | 24      | 10      | decidualization        | HBEGF,PTHLH,PRL,DE   | 6.79E-06 | 16 |
| Pathway | 595        | 45      | 7       | neuroprotection        | NPY,HSPA1A,HSPB2,IC  | 7.92E-06 | 17 |
| Pathway | 2112       | 117     | 5       | Embryonal development  | HBEGF,PTHLH,NPY,PC   | 1.03E-05 | 18 |
| Pathway | 1182       | 74      | 6       | regeneration           | HBEGF,AQP1,PTHLH,N   | 1.13E-05 | 19 |
| Pathway | 742        | 52      | 6       | lumen formation        | HBEGF,AQP1,PTHLH,N   | 1.34E-05 | 20 |
| Pathway | 1443       | 86      | 5       | contraction            | HBEGF,SLC4A1,PTHLH   | 1.38E-05 | 21 |
| Pathway | 883        | 59      | 6       | neuronal death         | PTHLH,POMC,HSPA1A    | 1.46E-05 | 22 |
| Pathway | 498        | 39      | 7       | eating behavior        | SLC15A1,PTHLH,NPY,F  | 1.47E-05 | 23 |
| Pathway | 847        | 57      | 6       | G2/M transition        | CCDC154,AQP4,PTHLH   | 1.67E-05 | 24 |
| Pathway | 652        | 47      | 7       | SMC proliferation      | HBEGF,PTHLH,NPY,MY   | 1.73E-05 | 25 |
| Pathway | 1547       | 90      | 5       | morphogenesis          | HBEGF,PTHLH,HSPA1A   | 2.15E-05 | 26 |
| Pathway | 567        | 42      | 7       | blood circulation      | HBEGF,AQP1,PTHLH,N   | 2.60E-05 | 27 |
| Pathway | 1390       | 82      | 5       | ROS generation         | HBEGF,AQP4,NPY,POM   | 3.21E-05 | 28 |
| Pathway | 1414       | 83      | 5       | cell motility          | HBEGF,AQP1,PTHLH,N   | 3.41E-05 | 29 |
| Pathway | 691        | 48      | 6       | ossification           | PTHLH,NPY,PRL,MYC,I  | 3.62E-05 | 30 |
| Pathway | 792        | 53      | 6       | mitotic entry          | HBEGF,PTHLH,NPY,PC   | 3.87E-05 | 31 |
| Pathway | 240        | 23      | 9       | muscle development     | PTHLH,POMC,DES,IGF   | 4.40E-05 | 32 |
| Pathway | 227        | 22      | 9       | hormone secretion      | SLC15A1,PTHLH,NPY,F  | 5.43E-05 | 33 |
| Pathway | 46         | 9       | 19      | response to starvation | SLC15A1,NPY,POMC,C   | 5.51E-05 | 34 |
| Pathway | 1504       | 86      | 5       | inflammatory response  | HBEGF,PTHLH,NPY,PC   | 6.20E-05 | 35 |
| Pathway | 109        | 14      | 12      | thyroid function       | NPY,PRL,IL1B,GCG,VW  | 6.66E-05 | 36 |
| Pathway | 812        | 53      | 6       | relaxation             | SLC4A1,AQP1,PTHLH,I  | 7.44E-05 | 37 |
| Pathway | 85         | 12      | 13      | exit from mitosis      | CCNE1,CDK1,HSP90A,   | 8.90E-05 | 38 |
| Pathway | 861        | 55      | 6       | life span              | SLC4A1,PTHLH,NPY,H   | 9.60E-05 | 39 |
| Pathway | 1117       | 67      | 5       | DNA Damage             | HBEGF,POMC,HSPA1A    | 0.00011  | 40 |
| Pathway | 610        | 42      | 6       | myogenesis             | DES,MYC,IGF2,IL1B,M  | 0.00014  | 41 |
| Pathway | 1672       | 92      | 5       | mitosis                | HBEGF,SLC4A1,NPY,P   | 0.00014  | 42 |
| Pathway | 611        | 42      | 6       | vasodilation           | HBEGF,PTHLH,NPY,PC   | 0.00014  | 43 |
| Pathway | 52         | 9       | 16      | vasopressin secretion  | NPY,POMC,PRL,IL1B,C  | 0.00015  | 44 |

|         |      |    |                                 |                        |         |    |
|---------|------|----|---------------------------------|------------------------|---------|----|
| Pathway | 654  | 44 | 6 immunoreactivity              | HBEGF,AQP4,NPY,POMC    | 0.00016 | 45 |
| Pathway | 446  | 33 | 7 kidney function               | HBEGF,AQP1,PTHLH,NPY   | 0.00019 | 46 |
| Pathway | 485  | 35 | 7 vasoconstriction              | HBEGF,PTHLH,NPY,PC     | 0.0002  | 47 |
| Pathway | 320  | 26 | 8 muscle function               | AQP4,PTHLH,NPY,POMC    | 0.00022 | 48 |
| Pathway | 589  | 40 | 6 protein folding               | SLC4A1,HSPA1A,MYC,IL1B | 0.00026 | 49 |
| Pathway | 1197 | 69 | 5 cell invasion                 | HBEGF,SLC4A1,PTHLH,NPY | 0.00028 | 50 |
| Pathway | 221  | 20 | 9 kinetochore assembly          | CDK1,HSP90AA1,ESPL1    | 0.00029 | 51 |
| Pathway | 515  | 36 | 6 adipocyte differentiation     | HBEGF,PTHLH,NPY,PR     | 0.0003  | 52 |
| Pathway | 205  | 19 | 9 thermogenesis                 | NPY,POMC,HSPA1A,PF     | 0.00031 | 53 |
| Pathway | 1115 | 65 | 5 actin organization            | NPY,POMC,HSPA1A,PF     | 0.00031 | 54 |
| Pathway | 58   | 9  | 15 response to heat shock       | POMC,HSPA1A,HSPB2      | 0.00034 | 55 |
| Pathway | 1316 | 74 | 5 immunity                      | NPY,POMC,HSPA1A,PF     | 0.00035 | 56 |
| Pathway | 175  | 17 | 9 lymphangiogenesis             | PRL,MYC,IGF2,IL1B,PC   | 0.00037 | 57 |
| Pathway | 26   | 6  | 22 M/G1 transition              | CCNE1,CDK1,CCNA2,C     | 0.00042 | 58 |
| Pathway | 373  | 28 | 7 reproduction                  | HBEGF,NPY,POMC,HS      | 0.00047 | 59 |
| Pathway | 116  | 13 | 11 leukocyte accumulation       | NPY,POMC,HSPA1A,IL     | 0.00047 | 60 |
| Pathway | 374  | 28 | 7 gluconeogenesis               | NPY,POMC,MYC,IGF2,I    | 0.00049 | 61 |
| Pathway | 1875 | 98 | 5 DNA replication               | HBEGF,PTHLH,NPY,PC     | 0.0005  | 62 |
| Pathway | 338  | 26 | 7 endothelial cell adhesion     | HBEGF,SLC4A1,NPY,P     | 0.00051 | 63 |
| Pathway | 197  | 18 | 9 skeletal development          | PTHLH,MYC,MMP2,NO      | 0.00052 | 64 |
| Pathway | 63   | 9  | 14 DNA replication checkpoint   | MYC,CCNE1,CDK1,MR      | 0.00063 | 65 |
| Pathway | 105  | 12 | 11 fluid transport              | AQP4,AQP1,NPY,PRL,I    | 0.00065 | 66 |
| Pathway | 402  | 29 | 7 microtubule cytoskeleton as   | HSPA1A,FPR1,TNNC1,I    | 0.0007  | 67 |
| Pathway | 661  | 42 | 6 protein degradation           | NPY,POMC,HSPA1A,IG     | 0.00072 | 68 |
| Pathway | 186  | 17 | 9 capillary permeability        | NPY,MYC,IL1B,ALOX5,I   | 0.00074 | 69 |
| Pathway | 138  | 14 | 10 diuresis                     | AQP4,AQP1,PTHLH,NF     | 0.00078 | 70 |
| Pathway | 1289 | 71 | 5 calcium ion homeostasis       | HBEGF,AQP4,PTHLH,N     | 0.00081 | 71 |
| Pathway | 1004 | 58 | 5 memory                        | HBEGF,AQP4,NPY,POM     | 0.00082 | 72 |
| Pathway | 1880 | 97 | 5 immune response               | AQP4,SLC15A1,PTHLH     | 0.00083 | 73 |
| Pathway | 313  | 24 | 7 chromosome segregation        | GAS2L3,CDK1,HSP90A     | 0.00087 | 74 |
| Pathway | 20   | 5  | 23 muscle maintenance           | HSPB2,HSPB1,CRYAB,     | 0.00092 | 75 |
| Pathway | 225  | 19 | 8 appetite                      | PTHLH,NPY,POMC,PRI     | 0.00096 | 76 |
| Pathway | 279  | 22 | 7 response to hypoxia           | MYC,HSPB2,IL1B,CAT,I   | 0.00098 | 77 |
| Pathway | 298  | 23 | 7 bone development              | PTHLH,PRL,IGF2,IL1B,   | 0.00101 | 78 |
| Pathway | 949  | 55 | 5 senescence                    | SLC4A1,POMC,HSPA1,     | 0.00103 | 79 |
| Pathway | 842  | 50 | 5 transmission of nerve impul   | AQP4,NPY,POMC,HSP      | 0.00104 | 80 |
| Pathway | 227  | 19 | 8 neuron apoptoses              | AQP4,HSPA1A,MYC,IL     | 0.00107 | 81 |
| Pathway | 282  | 22 | 7 regulation of action potentie | NPY,POMC,IL1B,CAT,K    | 0.00113 | 82 |
| Pathway | 1021 | 58 | 5 exocytosis                    | SLC4A1,AQP1,PTHLH,I    | 0.00122 | 83 |
| Pathway | 828  | 49 | 5 G1/S transition               | HBEGF,PTHLH,HSPA1,     | 0.00125 | 84 |
| Pathway | 341  | 25 | 7 ovulation                     | POMC,PRL,IGF2,IL1B,I   | 0.00129 | 85 |
| Pathway | 32   | 6  | 18 leukocyte aggregation        | FPR1,MMP2,C5,SELP,\    | 0.0013  | 86 |
| Pathway | 196  | 17 | 8 muscle regeneration           | AQP1,HSPA1A,DES,IGI    | 0.00131 | 87 |
| Pathway | 196  | 17 | 8 visual learning               | NPY,HSPA1A,IL1B,GCC    | 0.00131 | 88 |
| Pathway | 380  | 27 | 7 blood vessel development      | PTHLH,PRL,MYC,IL1B,    | 0.00132 | 89 |
| Pathway | 480  | 32 | 6 osteoblast differentiation    | HBEGF,PTHLH,POMC,I     | 0.00141 | 90 |
| Pathway | 288  | 22 | 7 perception of pain            | AQP4,AQP1,NPY,POMC     | 0.00147 | 91 |

|         |     |    |    |                            |                      |         |     |
|---------|-----|----|----|----------------------------|----------------------|---------|-----|
| Pathway | 307 | 23 | 7  | placenta development       | PTHLH,PRL,IGF2,IL1B, | 0.0015  | 92  |
| Pathway | 326 | 24 | 7  | bone remodeling            | PTHLH,NPY,POMC,PRI   | 0.00151 | 93  |
| Pathway | 33  | 6  | 17 | thyroid hormone generation | NPY,POMC,GCG,TSHR    | 0.00153 | 94  |
| Pathway | 101 | 11 | 10 | cellular extravasation     | POMC,IL1B,ALOX5,FPI  | 0.0016  | 95  |
| Pathway | 328 | 24 | 7  | response to stress         | NPY,POMC,HSPA1A,Pf   | 0.00164 | 96  |
| Pathway | 671 | 41 | 6  | synaptic plasticity        | HBEGF,AQP4,NPY,POM   | 0.00173 | 97  |
| Pathway | 351 | 25 | 7  | cell aging                 | SLC4A1,HSPA1A,MYC,   | 0.00191 | 98  |
| Pathway | 592 | 37 | 6  | Glucose metabolism         | HBEGF,NPY,POMC,HSI   | 0.00195 | 99  |
| Pathway | 410 | 28 | 6  | glucose homeostasis        | HBEGF,NPY,POMC,PRI   | 0.00195 | 100 |

## B. Female Rats Sampled at Night

| Type    | Total # of | Overlap | Percent | Gene Set Seed              | Overlapping Entities | p-value  | #  |
|---------|------------|---------|---------|----------------------------|----------------------|----------|----|
| Pathway | 5852       | 482     | 8       | Apoptosis                  | SPINK2,SYT1,ICAM1,P  | 9.17E-15 | 1  |
| Pathway | 6179       | 483     | 7       | Cell proliferation         | NACC1,ICAM1,P2RX2,1  | 1.05E-10 | 2  |
| Pathway | 5424       | 432     | 7       | cell differentiation       | ICAM1,P2RX2,SLC9A3   | 1.94E-10 | 3  |
| Pathway | 3544       | 296     | 8       | cell death                 | ICAM1,P2RX2,AQP4,P   | 7.62E-09 | 4  |
| Pathway | 3935       | 320     | 8       | cell growth                | ICAM1,SLC2A4,PTGS2   | 2.50E-08 | 5  |
| Pathway | 3401       | 281     | 8       | cell cycle                 | ICAM1,AQP4,PTGS2,E   | 6.35E-08 | 6  |
| Pathway | 1672       | 152     | 9       | mitosis                    | ICAM1,PTGS2,EGF,IRS  | 8.05E-07 | 7  |
| Pathway | 1547       | 141     | 9       | morphogenesis              | ICAM1,PTGS2,EGF,IRS  | 1.86E-06 | 8  |
| Pathway | 1129       | 109     | 9       | S phase                    | PTGS2,EGF,PTK2B,CA   | 2.42E-06 | 9  |
| Pathway | 2674       | 219     | 8       | cell migration             | ICAM1,AQP4,PTGS2,E   | 5.70E-06 | 10 |
| Pathway | 2112       | 179     | 8       | Embryonal development      | PTGS2,EGF,MARCKS,1   | 6.85E-06 | 11 |
| Pathway | 847        | 84      | 9       | G2/M transition            | AQP4,PTGS2,EGF,FAS   | 1.39E-05 | 12 |
| Pathway | 32         | 10      | 30      | vein development           | TGFB1,DUSP6,FBN1,H   | 2.06E-05 | 13 |
| Pathway | 1414       | 125     | 8       | cell motility              | ICAM1,SLC2A4,PTGS2   | 3.22E-05 | 14 |
| Pathway | 331        | 40      | 12      | M phase                    | PTGS2,EGF,TGFB1,MS   | 4.61E-05 | 15 |
| Pathway | 221        | 30      | 13      | kinetochore assembly       | HSP90AA1,PLK1,CHEK   | 5.01E-05 | 16 |
| Pathway | 2459       | 198     | 8       | cell survival              | ICAM1,SLC2A4,PTGS2   | 5.09E-05 | 17 |
| Pathway | 772        | 75      | 9       | meiosis                    | PTGS2,EGF,TGFB1,IGf  | 7.94E-05 | 18 |
| Pathway | 355        | 41      | 11      | dedifferentiation          | SLC2A4,PTGS2,EGF,T   | 0.0001   | 19 |
| Pathway | 703        | 69      | 9       | oncogenesis                | NACC1,PTGS2,EGF,IR   | 0.00011  | 20 |
| Pathway | 691        | 68      | 9       | ossification               | PTGS2,EGF,IRS1,PTK2  | 0.00012  | 21 |
| Pathway | 63         | 13      | 20      | DNA replication checkpoint | PLK1,CHEK1,CHEK2,B   | 0.00013  | 22 |
| Pathway | 580        | 59      | 10      | response to drug           | ICAM1,PTGS2,EGF,FA   | 0.00014  | 23 |
| Pathway | 621        | 62      | 9       | response to DNA damage     | PTGS2,CASP8,TGFB1,   | 0.00016  | 24 |
| Pathway | 214        | 28      | 13      | macrophage differentiation | CASP8,POMC,IL13,TGI  | 0.00017  | 25 |
| Pathway | 225        | 29      | 12      | G2 phase                   | EGF,GSN,PRKCB,HSP    | 0.00017  | 26 |
| Pathway | 152        | 22      | 14      | genetic instability        | EGF,TGFB1,BCL2L1,HI  | 0.0002   | 27 |
| Pathway | 176        | 24      | 13      | G2/M checkpoint            | PTGS2,PLK1,CHEK1,E   | 0.00026  | 28 |
| Pathway | 1182       | 103     | 8       | regeneration               | ICAM1,SLC2A4,PTGS2   | 0.00028  | 29 |
| Pathway | 328        | 37      | 11      | response to stress         | ICAM1,PTGS2,PTK2B,C  | 0.00035  | 30 |
| Pathway | 341        | 38      | 11      | chemosensitivity           | PTGS2,CSF2,HSPB1,B   | 0.00037  | 31 |
| Pathway | 828        | 76      | 9       | G1/S transition            | PTGS2,EGF,IRS1,PTK2  | 0.00041  | 32 |
| Pathway | 1239       | 106     | 8       | neurite outgrowth          | SYT1,EGF,PTK2B,MAR   | 0.00045  | 33 |
| Pathway | 792        | 73      | 9       | mitotic entry              | ICAM1,SLC2A4,PTGS2   | 0.00048  | 34 |

|         |      |     |                                 |                      |         |    |
|---------|------|-----|---------------------------------|----------------------|---------|----|
| Pathway | 110  | 17  | 15 mitotic checkpoint           | CASP8,PLK1,CHEK1,E   | 0.00049 | 35 |
| Pathway | 240  | 29  | 12 muscle development           | POMC,TGFB1,IGF2,MS   | 0.0005  | 36 |
| Pathway | 688  | 65  | 9 hemopoiesis                   | ICAM1,PTGS2,EGF,FA   | 0.00051 | 37 |
| Pathway | 2068 | 164 | 7 endocytosis                   | SYT1,ICAM1,SLC9A3,S  | 0.00052 | 38 |
| Pathway | 38   | 9   | 23 fibroblast accumulation      | PTGS2,FASLG,IL13,TG  | 0.00052 | 39 |
| Pathway | 196  | 25  | 12 muscle regeneration          | PTGS2,EGF,TGFB1,IGF  | 0.00054 | 40 |
| Pathway | 1471 | 122 | 8 cytokinesis                   | ICAM1,PTGS2,EGF,MA   | 0.00057 | 41 |
| Pathway | 155  | 21  | 13 ER-associated protein catal  | HSP90AA1,DDIT3,HSP   | 0.00068 | 42 |
| Pathway | 402  | 42  | 10 microtubule cytoskeleton as  | SYT1,EGF,TGFB1,PRK   | 0.00072 | 43 |
| Pathway | 189  | 24  | 12 GO'                          | PTGS2,EGF,MARCKS,F   | 0.00074 | 44 |
| Pathway | 416  | 43  | 10 erythrocyte differentiation  | SLC2A4,EGF,FASLG,C   | 0.00078 | 45 |
| Pathway | 7    | 4   | 50 nerve maturation             | TGFB1,BCL2L1,COL15   | 0.00085 | 46 |
| Pathway | 610  | 58  | 9 myogenesis                    | PTGS2,EGF,IRS1,MAR   | 0.00086 | 47 |
| Pathway | 1445 | 119 | 8 oxidative stress              | ICAM1,PTGS2,EGF,IRS  | 0.00086 | 48 |
| Pathway | 76   | 13  | 16 xenobiotic metabolism        | PTGS2,POMC,GSTP1,I   | 0.00086 | 49 |
| Pathway | 1875 | 149 | 7 DNA replication               | ICAM1,SLC2A4,PTGS2   | 0.00089 | 50 |
| Pathway | 86   | 14  | 16 mitotic spindle assembly     | PLK1,CHEK1,CHEK2,B   | 0.00091 | 51 |
| Pathway | 335  | 36  | 10 chromosome condensation      | PTGS2,CASP8,TGFB1,   | 0.00103 | 52 |
| Pathway | 589  | 56  | 9 protein folding               | TGFB1,HSPB2,CCL2,C   | 0.00105 | 53 |
| Pathway | 595  | 56  | 9 neuroprotection               | P2RX2,PTGS2,FASLG,I  | 0.00132 | 54 |
| Pathway | 770  | 69  | 8 neurogenesis                  | P2RX2,AQP4,PTGS2,E   | 0.00142 | 55 |
| Pathway | 380  | 39  | 10 chondrogenesis               | EGF,FASLG,TGFB1,IGF  | 0.00153 | 56 |
| Pathway | 283  | 31  | 10 B lymphocyte differentiation | ICAM1,IRS1,FASLG,IL1 | 0.00166 | 57 |
| Pathway | 2094 | 162 | 7 Vascularization               | ICAM1,PTGS2,EGF,IRS  | 0.00167 | 58 |
| Pathway | 102  | 15  | 14 protein processing           | TGFB1,HSPB2,HSP90A   | 0.00172 | 59 |
| Pathway | 524  | 50  | 9 G0/G1 transition              | PTGS2,EGF,PTK2B,MA   | 0.00177 | 60 |
| Pathway | 74   | 12  | 16 colorectal motility          | PTGS2,GAL,POMC,AD    | 0.00216 | 61 |
| Pathway | 783  | 69  | 8 epithelial to mesenchymal t   | PTGS2,EGF,IRS1,PTK2  | 0.00216 | 62 |
| Pathway | 388  | 39  | 10 cell homeostasis             | ICAM1,PTGS2,EGF,FA   | 0.00222 | 63 |
| Pathway | 1443 | 116 | 8 contraction                   | ICAM1,P2RX2,SLC9A3   | 0.00231 | 64 |
| Pathway | 38   | 8   | 20 epithelial cell interaction  | ICAM1,TGFB1,IGF2,SH  | 0.00238 | 65 |
| Pathway | 207  | 24  | 11 lung function                | ICAM1,PTGS2,IL13,TG  | 0.00257 | 66 |
| Pathway | 418  | 41  | 9 macrophage activation         | ICAM1,PTGS2,FASLG,I  | 0.00272 | 67 |
| Pathway | 419  | 41  | 9 ER unfolded protein respon    | CASP8,TGFB1,HSPB2,   | 0.00283 | 68 |
| Pathway | 16   | 5   | 29 alveolar macrophage functi   | ICAM1,IL13,TGFB1,CSI | 0.00304 | 69 |
| Pathway | 88   | 13  | 14 epidermal proliferation      | EGF,TGFB1,CSF2,SHH   | 0.00331 | 70 |
| Pathway | 908  | 77  | 8 growth rate                   | ICAM1,PTGS2,EGF,MA   | 0.00339 | 71 |
| Pathway | 1278 | 103 | 8 pregnancy                     | ICAM1,SLC2A4,PTGS2   | 0.00374 | 72 |
| Pathway | 312  | 32  | 10 DNA methylation              | ICAM1,PTGS2,EGF,CA   | 0.00394 | 73 |
| Pathway | 146  | 18  | 12 male gonad development       | EGF,TGFB1,HSP90AA1   | 0.0045  | 74 |
| Pathway | 1504 | 118 | 7 inflammatory response         | ICAM1,PTGS2,EGF,PTI  | 0.00471 | 75 |
| Pathway | 687  | 60  | 8 spindle assembly              | EGF,TGFB1,PRKCB,PF   | 0.00497 | 76 |
| Pathway | 52   | 9   | 16 keratinization               | EGF,TGFB1,CSF2,HSP   | 0.00501 | 77 |
| Pathway | 381  | 37  | 9 genome instability            | PTGS2,TGFB1,HRAS,F   | 0.00502 | 78 |
| Pathway | 125  | 16  | 12 immune cell chemotaxis       | ICAM1,TGFB1,CCL2,C   | 0.00504 | 79 |
| Pathway | 305  | 31  | 10 engraftment                  | ICAM1,EGF,FASLG,TGI  | 0.00513 | 80 |
| Pathway | 661  | 58  | 8 protein degradation           | SLC9A3,PTGS2,EGF,IF  | 0.00517 | 81 |



|         |      |     |                                 |                       |         |     |
|---------|------|-----|---------------------------------|-----------------------|---------|-----|
| Pathway | 207  | 23  | 11 cell cycle checkpoint        | EGF,HSP90AA1,CHEK1    | 0.00528 | 82  |
| Pathway | 869  | 73  | 8 cell development              | ICAM1,PTGS2,EGF,PTI   | 0.00537 | 83  |
| Pathway | 637  | 56  | 8 viral reproduction            | ICAM1,PTGS2,EGF,FAS   | 0.00572 | 84  |
| Pathway | 693  | 60  | 8 locomotion                    | ICAM1,AQP4,PTGS2,EGF  | 0.00597 | 85  |
| Pathway | 861  | 72  | 8 life span                     | ICAM1,SLC2A4,PTGS2    | 0.0063  | 86  |
| Pathway | 695  | 60  | 8 heart function                | ICAM1,P2RX2,SLC2A4    | 0.00634 | 87  |
| Pathway | 654  | 57  | 8 immunoreactivity              | P2RX2,AQP4,PTGS2,EGF  | 0.00636 | 88  |
| Pathway | 323  | 32  | 9 osteoclast formation          | ICAM1,PTGS2,EGF,PTI   | 0.00655 | 89  |
| Pathway | 27   | 6   | 21 skin changes                 | PTGS2,TGFB1,CCL2,IL1  | 0.00659 | 90  |
| Pathway | 1289 | 102 | 7 calcium ion homeostasis       | SYT1,ICAM1,P2RX2,AC   | 0.00663 | 91  |
| Pathway | 85   | 12  | 13 exit from mitosis            | HSP90AA1,PLK1,CCN1    | 0.00678 | 92  |
| Pathway | 118  | 15  | 12 ovarian follicle development | EGF,POMC,TGFB1,IGF    | 0.00695 | 93  |
| Pathway | 363  | 35  | 9 osteoclast differentiation    | ICAM1,PTGS2,FASLG,IL1 | 0.00697 | 94  |
| Pathway | 249  | 26  | 10 phagocyte activity           | ICAM1,EGF,POMC,IL1    | 0.00706 | 95  |
| Pathway | 1021 | 83  | 8 exocytosis                    | SYT1,ICAM1,P2RX2,SL   | 0.00718 | 96  |
| Pathway | 742  | 63  | 8 lumen formation               | ICAM1,PTGS2,EGF,PTI   | 0.00747 | 97  |
| Pathway | 1197 | 95  | 7 cell invasion                 | ICAM1,PTGS2,EGF,PTI   | 0.00801 | 98  |
| Pathway | 109  | 14  | 12 testis function              | PTGS2,EGF,POMC,TG     | 0.00822 | 99  |
| Pathway | 279  | 28  | 10 response to hypoxia          | P2RX2,SLC2A4,PTGS2    | 0.00895 | 100 |

**Table SI-3. Common Sub-Network Cell Processes**

**A. Males and Females Sampled at Night**

| Type    | Total # of Overlap | Gene Set Seed                   | Overlapping Entities       | p-value  | #  |
|---------|--------------------|---------------------------------|----------------------------|----------|----|
| Pathway | 3544               | 70 cell death                   | POMC,HSPB2,IGF2,ADRB2,H    | 2.22E-07 | 1  |
| Pathway | 5852               | 94 Apoptosis                    | POMC,HSPB2,IGF2,ADRB2,H    | 1.07E-05 | 2  |
| Pathway | 589                | 19 protein folding              | HSPB2,HSPB1,GSTP1,PTGS1    | 3.31E-05 | 3  |
| Pathway | 221                | 11 kinetochore assembly         | PLK1,CCNA2,BUB1B,RAN,TOF   | 3.95E-05 | 4  |
| Pathway | 229                | 11 decidualization              | IGF2,HSPB1,PTGS1,HSPA5,IN  | 5.44E-05 | 5  |
| Pathway | 1278               | 30 pregnancy                    | POMC,IGF2,ADRB2,HSPB1,C    | 7.80E-05 | 6  |
| Pathway | 74                 | 6 colorectal motility           | POMC,ADRB2,PTGS1,CARTP     | 0.00019  | 7  |
| Pathway | 240                | 10 muscle development           | POMC,IGF2,HSPB1,INHBA,INH  | 0.00037  | 8  |
| Pathway | 498                | 15 eating behavior              | POMC,IGF2,ADRB2,C5,INHBA   | 0.00047  | 9  |
| Pathway | 58                 | 5 response to heat shock        | POMC,HSPB2,HSPB1,HSPA5,    | 0.0005   | 10 |
| Pathway | 61                 | 5 oocyte development            | HSPB1,INHBA,MIF,WNT4,INCE  | 0.00062  | 11 |
| Pathway | 695                | 18 heart function               | POMC,HSPB2,IGF2,ADRB2,H    | 0.00078  | 12 |
| Pathway | 419                | 13 ER unfolded protein response | HSPB2,IGF2,HSPB1,HSPA5,H   | 0.00086  | 13 |
| Pathway | 2112               | 39 Embryonal development        | POMC,IGF2,ADRB2,HSPB1,C    | 0.00093  | 14 |
| Pathway | 6179               | 90 Cell proliferation           | POMC,HSPB2,IGF2,ADRB2,H    | 0.00097  | 15 |
| Pathway | 652                | 17 SMC proliferation            | ADRB2,SELP,ID1,INHBA,MIF,N | 0.00101  | 16 |
| Pathway | 102                | 6 protein processing            | HSPB2,HSPA5,HYOU1,PARK2    | 0.00102  | 17 |
| Pathway | 227                | 9 hormone secretion             | POMC,IGF2,ADRB2,ID1,INHBA  | 0.00104  | 18 |
| Pathway | 196                | 8 muscle regeneration           | IGF2,ADRB2,SELP,HIST2H3C,  | 0.00164  | 19 |
| Pathway | 199                | 8 nucleotide-excision repair    | POMC,HSPB2,HSPA5,ADA,HP    | 0.00181  | 20 |
| Pathway | 691                | 17 ossification                 | IGF2,ADRB2,PTGS1,ID1,INHBA | 0.00189  | 21 |
| Pathway | 118                | 6 ovarian follicle development  | POMC,IGF2,INHBA,NPPC,WN    | 0.00214  | 22 |
| Pathway | 307                | 10 placenta development         | IGF2,HSPB1,PLCD1,MIF,FAAH  | 0.0024   | 23 |
| Pathway | 5424               | 79 cell differentiation         | POMC,HSPB2,IGF2,ADRB2,H    | 0.00265  | 24 |
| Pathway | 595                | 15 neuroprotection              | HSPB2,IGF2,ADRB2,HSPB1,G   | 0.00276  | 25 |
| Pathway | 2094               | 37 Vascularization              | POMC,HSPB2,IGF2,ADRB2,H    | 0.0028   | 26 |
| Pathway | 3401               | 54 cell cycle                   | POMC,HSPB2,IGF2,HSPB1,G    | 0.00294  | 27 |
| Pathway | 87                 | 5 sister chromatid cohesion     | PLK1,BUB1B,INCENP,CDCA5,   | 0.00299  | 28 |
| Pathway | 1672               | 31 mitosis                      | POMC,IGF2,PTGS1,GJA3,PLK   | 0.00315  | 29 |
| Pathway | 1390               | 27 ROS generation               | POMC,HSPB2,ADRB2,HSPB1,    | 0.00316  | 30 |
| Pathway | 544                | 14 insulin sensitivity          | POMC,HSPB2,IGF2,ADRB2,ID   | 0.00316  | 31 |
| Pathway | 328                | 10 response to stress           | POMC,HSPB2,ADRB2,HSPB1,    | 0.00384  | 32 |
| Pathway | 94                 | 5 adrenal gland function        | POMC,IGF2,PTGS1,MIF,CD46   | 0.00416  | 33 |
| Pathway | 279                | 9 response to hypoxia           | HSPB2,HSPB1,PTGS1,SELP,H   | 0.00418  | 34 |
| Pathway | 335                | 10 chromosome condensation      | HSPB2,PLK1,MIF,CCNA2,RAN   | 0.00444  | 35 |
| Pathway | 817                | 18 wound healing                | POMC,IGF2,ADRB2,HSPB1,P1   | 0.00452  | 36 |
| Pathway | 1289               | 25 calcium ion homeostasis      | POMC,IGF2,ADRB2,HSPB1,C    | 0.0046   | 37 |
| Pathway | 761                | 17 blood clotting               | POMC,IGF2,ADRB2,C5,PTGS1   | 0.00502  | 38 |
| Pathway | 341                | 10 chemosensitivity             | HSPB1,GSTP1,PLK1,ID1,HSP   | 0.00502  | 39 |

|         |      |                                     |                           |         |    |
|---------|------|-------------------------------------|---------------------------|---------|----|
| Pathway | 1445 | 27 oxidative stress                 | POMC,HSPB2,ADRB2,HSPB1,   | 0.00533 | 40 |
| Pathway | 703  | 16 oncogenesis                      | IGF2,ADRB2,HSPB1,GSTP1,P  | 0.00541 | 41 |
| Pathway | 143  | 6 estrous cycle                     | POMC,HSPB2,ADRB2,PTGS1,   | 0.00548 | 42 |
| Pathway | 402  | 11 microtubule cytoskeleton assembl | PLK1,MIF,NPPC,RAN,PARK2,T | 0.00553 | 43 |
| Pathway | 190  | 7 kidney blood flow                 | POMC,ADRB2,C5,PTGS1,SEL   | 0.00557 | 44 |
| Pathway | 193  | 7 gastric acid secretion            | POMC,IGF2,ADRB2,ATP1A1,C  | 0.00605 | 45 |
| Pathway | 3935 | 59 cell growth                      | POMC,HSPB2,IGF2,ADRB2,H   | 0.00658 | 46 |
| Pathway | 1547 | 28 morphogenesis                    | IGF2,SELP,PLCD1,DSP,HSPA5 | 0.00697 | 47 |
| Pathway | 108  | 5 cardiomyocyte differentiation     | IGF2,INHBA,CCNA2,TBX1,ZNF | 0.00741 | 48 |
| Pathway | 2459 | 40 cell survival                    | POMC,HSPB2,IGF2,ADRB2,H   | 0.00783 | 49 |
| Pathway | 205  | 7 thermogenesis                     | POMC,ADRB2,PLCD1,ID1,CAF  | 0.0083  | 50 |
| Pathway | 740  | 16 G1 phase                         | POMC,IGF2,ID1,INHBA,TFRC, | 0.00866 | 51 |
| Pathway | 207  | 7 embryo implantation               | IGF2,INHBA,MIF,IHH,HPSE,W | 0.00873 | 52 |
| Pathway | 373  | 10 reproduction                     | POMC,IGF2,INHBA,MIF,CARTP | 0.00919 | 53 |
| Pathway | 374  | 10 gluconeogenesis                  | POMC,IGF2,ADRB2,INHBA,PR  | 0.00935 | 54 |
| Pathway | 1880 | 32 immune response                  | POMC,HSPB2,IGF2,ADRB2,H   | 0.00951 | 55 |
| Pathway | 883  | 18 neuronal death                   | POMC,HSPB2,IGF2,HSPB1,G   | 0.00977 | 56 |
| Pathway | 621  | 14 response to DNA damage           | HSPB2,HSPB1,GSTP1,PLK1,I  | 0.00981 | 57 |
| Pathway | 116  | 5 leukocyte accumulation            | POMC,C5,SELP,MIF,ADA      | 0.0099  | 58 |
| Pathway | 498  | 12 cellular immune response         | POMC,ADRB2,HSPB1,C5,INH   | 0.01008 | 59 |
| Pathway | 688  | 15 hemopoiesis                      | POMC,IGF2,ADRB2,GSTP1,SE  | 0.01016 | 60 |
| Pathway | 270  | 8 interphase                        | PLK1,HSPA5,CCNA2,BUB1B,F  | 0.01102 | 61 |
| Pathway | 326  | 9 bone remodeling                   | POMC,IGF2,INHBA,MIF,CARTP | 0.01107 | 62 |
| Pathway | 122  | 5 gastrointestinal motility         | MIF,CARTPT,ADORA2B,CD46,  | 0.01211 | 63 |
| Pathway | 331  | 9 M phase                           | PLK1,CCNA2,CFB,BUB1B,CC   | 0.01213 | 64 |
| Pathway | 1182 | 22 regeneration                     | POMC,HSPB2,IGF2,HSPB1,C   | 0.01221 | 65 |
| Pathway | 332  | 9 heart contraction                 | ADRB2,HSPB1,C5,MIF,PRKAA  | 0.01235 | 66 |
| Pathway | 2068 | 34 endocytosis                      | POMC,IGF2,ADRB2,HSPB1,C   | 0.0124  | 67 |
| Pathway | 1117 | 21 DNA Damage                       | POMC,IGF2,HSPB1,C5,GSTP1  | 0.01285 | 68 |
| Pathway | 227  | 7 neuron apoptoses                  | HSPB1,GSTP1,NUCB2,PARK2   | 0.01395 | 69 |
| Pathway | 341  | 9 ovulation                         | POMC,IGF2,HSPB1,PTGS1,MI  | 0.01447 | 70 |
| Pathway | 592  | 13 Glucose metabolism               | POMC,IGF2,ADRB2,HSPA5,IN  | 0.0154  | 71 |
| Pathway | 288  | 8 perception of pain                | POMC,ADRB2,PTGS1,MIF,CAI  | 0.0157  | 72 |
| Pathway | 1875 | 31 DNA replication                  | POMC,HSPB2,IGF2,ADRB2,C   | 0.01573 | 73 |
| Pathway | 131  | 5 gastric emptying                  | POMC,MIF,CARTPT,CD46,NUC  | 0.01602 | 74 |
| Pathway | 1504 | 26 inflammatory response            | POMC,HSPB2,IGF2,ADRB2,H   | 0.01603 | 75 |
| Pathway | 2674 | 41 cell migration                   | POMC,HSPB2,IGF2,ADRB2,H   | 0.01832 | 76 |
| Pathway | 242  | 7 leukocyte function                | POMC,ADRB2,C5,SELP,MIF,AI | 0.01911 | 77 |
| Pathway | 361  | 9 genome stability                  | PLK1,CCNA2,HPSE,CFB,BUB   | 0.02015 | 78 |
| Pathway | 192  | 6 pigmentation                      | POMC,ADRB2,MIF,IHH,CFB,A  | 0.02099 | 79 |
| Pathway | 425  | 10 xenobiotic clearance             | POMC,GSTP1,GCLC,MIF,FAA   | 0.02102 | 80 |
| Pathway | 305  | 8 engraftment                       | GSTP1,SELP,PLK1,ID1,ADA,I | 0.02132 | 81 |
| Pathway | 143  | 5 pinocytosis                       | POMC,HSPB1,INHBA,CD46,TF  | 0.02243 | 82 |
| Pathway | 693  | 14 locomotion                       | POMC,ADRB2,HSPB1,CARTP    | 0.02316 | 83 |

|         |      |                                    |                           |         |     |
|---------|------|------------------------------------|---------------------------|---------|-----|
| Pathway | 197  | 6 skeletal development             | INHBA,IHH,FGFR4,SULF1,PAF | 0.02345 | 84  |
| Pathway | 313  | 8 chromosome segregation           | PLK1,BUB1B,RAN,TOP2A,NDX  | 0.02441 | 85  |
| Pathway | 147  | 5 salinity response                | POMC,IGF2,NPPC,KLK1,PDXK  | 0.02488 | 86  |
| Pathway | 380  | 9 chondrogenesis                   | IGF2,INHBA,NPPC,IHH,WNT4, | 0.0269  | 87  |
| Pathway | 847  | 16 G2/M transition                 | HSPB1,GSTP1,PLCD1,PLK1,IC | 0.02732 | 88  |
| Pathway | 207  | 6 lung function                    | ADRB2,GSTP1,PTGS1,SELP,C  | 0.02892 | 89  |
| Pathway | 324  | 8 lactation                        | POMC,PTGS1,ID1,TFRC,CAR   | 0.02914 | 90  |
| Pathway | 580  | 12 response to drug                | ADRB2,HSPB1,GSTP1,HSPA5   | 0.02928 | 91  |
| Pathway | 388  | 9 organogenesis                    | POMC,IGF2,INHBA,CALCR,IH  | 0.03017 | 92  |
| Pathway | 388  | 9 cell homeostasis                 | HSPB2,GSTP1,PTGS1,HSPA5   | 0.03017 | 93  |
| Pathway | 155  | 5 ER-associated protein catabolism | HSPA5,PARK2,DERL3,ERP29,  | 0.0303  | 94  |
| Pathway | 1443 | 24 contraction                     | POMC,HSPB2,IGF2,ADRB2,H   | 0.03058 | 95  |
| Pathway | 796  | 15 T lymphocyte proliferation      | POMC,IGF2,ADRB2,HSPB1,C   | 0.03269 | 96  |
| Pathway | 938  | 17 DNA repair                      | POMC,GSTP1,PLK1,MIF,CCN   | 0.03279 | 97  |
| Pathway | 214  | 6 macrophage differentiation       | POMC,HSPB1,SELP,ID1,MIF,C | 0.03322 | 98  |
| Pathway | 400  | 9 glycolysis                       | POMC,ADRB2,TFRC,MIF,ADA,  | 0.03558 | 99  |
| Pathway | 342  | 8 hemato-encephalic barrier        | POMC,ADRB2,C5,PTGS1,SEL   | 0.0382  | 100 |

## B. Females Sampled at Night and in the Morning

| Type    | Total # of | Overlap | Gene Set Seed           | Overlapping Entities      | p-value  | #  |
|---------|------------|---------|-------------------------|---------------------------|----------|----|
| Pathway | 1129       | 22      | S phase                 | POMC,MSTN,CCL2,GAPDH,SI   | 9.02E-08 | 1  |
| Pathway | 1875       | 26      | DNA replication         | POMC,MSTN,CCL2,GAPDH,SI   | 3.63E-06 | 2  |
| Pathway | 828        | 16      | G1/S transition         | MSTN,GAPDH,SPHK1,PLCD1,   | 7.61E-06 | 3  |
| Pathway | 740        | 15      | G1 phase                | POMC,MSTN,AURKB,CCNB1,I   | 8.64E-06 | 4  |
| Pathway | 5852       | 49      | Apoptosis               | POMC,MSTN,HAVCR1,CCL2,C   | 0.00012  | 5  |
| Pathway | 908        | 14      | growth rate             | POMC,MSTN,GAPDH,MIF,KITL  | 0.00033  | 6  |
| Pathway | 3935       | 36      | cell growth             | POMC,MSTN,CCL2,GAPDH,SI   | 0.00035  | 7  |
| Pathway | 192        | 6       | pigmentation            | POMC,MIF,KITLG,CFB,SLC45  | 0.0006   | 8  |
| Pathway | 792        | 12      | mitotic entry           | POMC,CCL2,SPHK1,MIF,KITL  | 0.00105  | 9  |
| Pathway | 6179       | 48      | Cell proliferation      | POMC,MSTN,HAVCR1,CCL2,C   | 0.00109  | 10 |
| Pathway | 1278       | 16      | pregnancy               | POMC,MSTN,CCL2,SPHK1,MI   | 0.00117  | 11 |
| Pathway | 3401       | 31      | cell cycle              | POMC,MSTN,CCL2,GAPDH,SI   | 0.00121  | 12 |
| Pathway | 621        | 10      | response to DNA damage  | GAPDH,MIF,AURKB,CCNB1,SI  | 0.0018   | 13 |
| Pathway | 2459       | 24      | cell survival           | POMC,MSTN,CCL2,GAPDH,SI   | 0.00213  | 14 |
| Pathway | 637        | 10      | viral reproduction      | CCL2,SPHK1,MIF,PPA1,CFB,P | 0.00217  | 15 |
| Pathway | 335        | 7       | chromosome condensation | MIF,AURKB,CCNB1,PPIA,CCN  | 0.00218  | 16 |
| Pathway | 869        | 12      | cell development        | POMC,MSTN,CCL2,KITLG,ZB1  | 0.0023   | 17 |
| Pathway | 3544       | 31      | cell death              | POMC,MSTN,CCL2,GAPDH,SI   | 0.0024   | 18 |
| Pathway | 176        | 5       | G2/M checkpoint         | AURKB,CCNB1,CCNB2,TOPBI   | 0.00262  | 19 |
| Pathway | 179        | 5       | positive chemotaxis     | CCL2,MIF,KITLG,PPIA,CXCL1 | 0.00282  | 20 |
| Pathway | 355        | 7       | dedifferentiation       | HAVCR1,CCL2,GAPDH,SPHK1   | 0.00301  | 21 |
| Pathway | 1414       | 16      | cell motility           | POMC,HAVCR1,CCL2,GAPDH    | 0.00328  | 22 |
| Pathway | 189        | 5       | G0'                     | MIF,KITLG,CCND2,MCM2,SMC  | 0.00355  | 23 |
| Pathway | 580        | 9       | response to drug        | SPHK1,MIF,PPIA,ABCA3,TNFS | 0.00392  | 24 |

|                |            |                                    |                                 |                |           |
|----------------|------------|------------------------------------|---------------------------------|----------------|-----------|
| Pathway        | 1182       | 14 regeneration                    | POMC,MSTN,HAVCR1,CCL2,C         | 0.00404        | 25        |
| Pathway        | 283        | 6 B lymphocyte differentiation     | GAPDH,MIF,KITLG,SOX4,TNF        | 0.00422        | 26        |
| Pathway        | 381        | 7 genome instability               | AURKB,CCNB1,NAIP,TOPBP1,        | 0.00442        | 27        |
| Pathway        | 402        | 7 microtubule cytoskeleton assembl | GAPDH,MIF,AURKB,FKBP5,FI        | 0.00589        | 28        |
| Pathway        | 214        | 5 macrophage differentiation       | POMC,CCL2,MIF,KITLG,IRF8        | 0.00598        | 29        |
| Pathway        | 5424       | 41 cell differentiation            | POMC,MSTN,HAVCR1,CCL2,C         | 0.00607        | 30        |
| Pathway        | 516        | 8 fertilization                    | POMC,CCL2,KITLG,AURKB,C         | 0.00652        | 31        |
| Pathway        | 221        | 5 kinetochore assembly             | AURKB,CCNB1,RANGAP1,INC         | 0.00683        | 32        |
| Pathway        | 757        | 10 spermatogenesis                 | POMC,MIF,KITLG,TSPO,ZBTB        | 0.00729        | 33        |
| Pathway        | 227        | 5 neuron apoptoses                 | GAPDH,KITLG,NAIP,PPIA,ZNF       | 0.00762        | 34        |
| Pathway        | 425        | 7 xenobiotic clearance             | POMC,GAPDH,MIF,ABCA3,GS         | 0.0079         | 35        |
| Pathway        | 770        | 10 neurogenesis                    | CCL2,MIF,KITLG,ZBTB16,PPIA      | 0.00817        | 36        |
| Pathway        | 231        | 5 hemostasis                       | KITLG,F5,MFAP2,PLSCR1,CAI       | 0.00818        | 37        |
| Pathway        | 331        | 6 M phase                          | MSTN,KITLG,AURKB,CCNB1,C        | 0.00885        | 38        |
| Pathway        | 236        | 5 parturition                      | POMC,CCL2,SPHK1,F5,CLDN         | 0.00892        | 39        |
| Pathway        | 1048       | 12 chromatin remodeling            | GAPDH,AURKB,CCNB1,ZBTB          | 0.01004        | 40        |
| Pathway        | 341        | 6 ovulation                        | POMC,CCL2,MIF,SERPINF2,C        | 0.01015        | 41        |
| Pathway        | 1880       | 18 immune response                 | POMC,MSTN,CCL2,GAPDH,M          | 0.01023        | 42        |
| Pathway        | 345        | 6 oocyte maturation                | POMC,KITLG,AURKB,CCNB1,I        | 0.01071        | 43        |
| Pathway        | 345        | 6 B lymphocyte proliferation       | POMC,MIF,KITLG,CFB,TNFSF        | 0.01071        | 44        |
| Pathway        | 566        | 8 leukocyte migration              | POMC,CCL2,MIF,KITLG,CCNB        | 0.01104        | 45        |
| Pathway        | 568        | 8 endothelial cell proliferation   | CCL2,SPHK1,MIF,PPIA,SPRY1       | 0.01126        | 46        |
| Pathway        | 1471       | 15 cytokinesis                     | POMC,MSTN,GAPDH,SPHK1,I         | 0.01127        | 47        |
| Pathway        | 2068       | 19 endocytosis                     | POMC,HAVCR1,CCL2,GAPDH          | 0.01261        | 48        |
| Pathway        | 2674       | 23 cell migration                  | POMC,CCL2,SPHK1,PLCD1,M         | 0.01262        | 49        |
| Pathway        | 361        | 6 genome stability                 | AURKB,CFB,TOPBP1,FANCD2         | 0.01315        | 50        |
| Pathway        | 589        | 8 protein folding                  | CCL2,GAPDH,FKBP5,PPIA,DU        | 0.01377        | 51        |
| Pathway        | 964        | 11 DNA recombination               | POMC,CCL2,CCNB1,TOPBP1,         | 0.01394        | 52        |
| Pathway        | 592        | 8 Glucose metabolism               | POMC,MSTN,CCL2,GAPDH,SI         | 0.01416        | 53        |
| Pathway        | 1672       | 16 mitosis                         | POMC,MSTN,GAPDH,MIF,KITL        | 0.01562        | 54        |
| Pathway        | 496        | 7 steroid metabolism               | POMC,MIF,KITLG,TSPO,F5,CC       | 0.01728        | 55        |
| Pathway        | 400        | 6 glycolysis                       | POMC,MSTN,GAPDH,MIF,PPA         | 0.0207         | 56        |
| Pathway        | 772        | 9 meiosis                          | KITLG,AURKB,CCNB1,PPIA,C        | 0.02256        | 57        |
| Pathway        | 410        | 6 glucose homeostasis              | POMC,MSTN,CCL2,MIF,CCND         | 0.02303        | 58        |
| Pathway        | 1197       | 12 cell invasion                   | POMC,CCL2,MIF,SOX4,SERPI        | 0.02591        | 59        |
| Pathway        | 1060       | 11 cytokine production             | POMC,CCL2,GAPDH,SPHK1,M         | 0.02614        | 60        |
| Pathway        | 544        | 7 insulin sensitivity              | POMC,MSTN,CCL2,MIF,FGFR         | 0.02696        | 61        |
| Pathway        | 429        | 6 stress fiber assembly            | CCL2,SPHK1,KITLG,SOX4,SPI       | 0.02794        | 62        |
| Pathway        | 2094       | 18 Vascularization                 | POMC,CCL2,SPHK1,PLCD1,M         | 0.02801        | 63        |
| Pathway        | 807        | 9 calcium mobilization             | POMC,CCL2,SPHK1,PLCD1,KI        | 0.02895        | 64        |
| Pathway        | 2112       | 18 Embryonal development           | POMC,MSTN,PLCD1,MIF,KITL        | 0.0302         | 65        |
| Pathway        | 326        | 5 bone remodeling                  | POMC,CCL2,MIF,KITLG,MFAP        | 0.03113        | 66        |
| <b>Pathway</b> | <b>328</b> | <b>5 response to stress</b>        | <b>POMC,MIF,KITLG,FKBP5,TSP</b> | <b>0.03184</b> | <b>67</b> |
| Pathway        | 693        | 8 locomotion                       | POMC,CCL2,SPHK1,KITLG,TS        | 0.0325         | 68        |

|                |             |                              |                               |                |           |
|----------------|-------------|------------------------------|-------------------------------|----------------|-----------|
| Pathway        | 703         | 8 oncogenesis                | GAPDH,SPHK1,MIF,AURKB,ZE      | 0.03493        | 69        |
| Pathway        | 341         | 5 chemosensitivity           | GAPDH,SPHK1,MIF,CCNB1,FA      | 0.03669        | 70        |
| Pathway        | 349         | 5 quiescence                 | MSTN,MIF,ZBTB16,SPRY1,CC      | 0.03988        | 71        |
| Pathway        | 595         | 7 neuroprotection            | CCL2,GAPDH,KITLG,TSPO,ZE      | 0.04074        | 72        |
| Pathway        | 1289        | 12 calcium ion homeostasis   | POMC,MSTN,CCL2,SPHK1,PL       | 0.04225        | 73        |
| Pathway        | 355         | 5 receptor internalization   | POMC,CCL2,SPHK1,KITLG,SF      | 0.04239        | 74        |
| Pathway        | 1151        | 11 chemotaxis                | POMC,MSTN,CCL2,GAPDH,SI       | 0.04361        | 75        |
| <b>Pathway</b> | <b>1445</b> | <b>13 oxidative stress</b>   | <b>POMC,MSTN,CCL2,GAPDH,M</b> | <b>0.04418</b> | <b>76</b> |
| Pathway        | 742         | 8 lumen formation            | POMC,CCL2,SPHK1,MIF,KITL      | 0.04559        | 77        |
| Pathway        | 742         | 8 T-cell response            | POMC,CCL2,MIF,CCNB1,CFB,      | 0.04559        | 78        |
| Pathway        | 363         | 5 osteoclast differentiation | CCL2,SPHK1,MIF,KITLG,IRF8     | 0.04587        | 79        |
| Pathway        | 883         | 9 neuronal death             | POMC,CCL2,GAPDH,SPHK1,M       | 0.047          | 80        |
| Pathway        | 1316        | 12 immunity                  | POMC,CCL2,MIF,KITLG,CFB,Z     | 0.04819        | 81        |

---

**Table SI-4. Gene Set Enrichment analysis**

**A. Male Rats Sampled at Night**

| Name                                    | Type    | Total Entities | Expanded # of Entities | # of Measured Entities | Measured Entities     | Enrichment Score (ES) | Normalized ES | Median change | p-value  | Gene Set Category             |
|-----------------------------------------|---------|----------------|------------------------|------------------------|-----------------------|-----------------------|---------------|---------------|----------|-------------------------------|
| INO80 Chromatin Remodeling              | Pathway | 25             | 449                    | 319                    | ORC6, PARG, DNMT3A, H | 0.3151                | 1.552         | 1.2           | 0.00E+00 | Ariadne Cell Process Pathways |
| TRRAP/Tip60 Chromatin Remodeling        | Pathway | 35             | 412                    | 283                    | PARG, DNMT3A, H       | 0.3051                | 1.45          | 1.2           | 0.00E+00 | Ariadne Cell Process Pathways |
| Translation                             | Pathway | 84             | 1104                   | 259                    | PTRH1, EEF1A2, F      | 0.3547                | 1.681         | 1.2           | 0.00E+00 | Ariadne Cell Process Pathways |
| mRNA Transcription and Processing       | Pathway | 49             | 391                    | 272                    | PARG, DNMT3A, H       | 0.3092                | 1.475         | 1.2           | 0.00E+00 | Ariadne Cell Process Pathways |
| rRNA Transcription and Processing       | Pathway | 35             | 292                    | 162                    | RPL23A, LOC6806       | 0.4173                | 1.833         | 1.3           | 0.00E+00 | Ariadne Cell Process Pathways |
| Tight Junction Assembly (JAMs)          | Pathway | 32             | 119                    | 95                     | MYH2, MYH7, MYH       | -0.5312               | -2.25         | 1.0           | 0.00E+00 | Ariadne Cell Process Pathways |
| Histone Phosphorylation                 | Pathway | 35             | 248                    | 173                    | MAPK12, NCAPG,        | 0.3712                | 1.654         | 1.1           | 0.00E+00 | Ariadne Cell Process Pathways |
| Single-Strand Mismatch DNA Repair       | Pathway | 19             | 125                    | 105                    | ALKBH1, UBE2V2,       | 0.3747                | 1.598         | 1.2           | 0.00E+00 | Ariadne Cell Process Pathways |
| Double Strand DNA Homologous Repair     | Pathway | 30             | 184                    | 156                    | ORC6, MCM4, ALK       | 0.3566                | 1.596         | 1.2           | 0.00E+00 | Ariadne Cell Process Pathways |
| Tight Junction Assembly (Claudins)      | Pathway | 37             | 137                    | 106                    | MYH2, MYH7, MYH       | -0.5124               | -2.26         | 1.0           | 0.00E+00 | Ariadne Cell Process Pathways |
| Tight Junction Assembly (Occludin)      | Pathway | 38             | 294                    | 226                    | MYH2, MYH7, MYH       | -0.3175               | -1.52         | 1.2           | 0.00E+00 | Ariadne Cell Process Pathways |
| Cell cycle                              | Pathway | 140            | 585                    | 413                    | MLF1, PKIA, ORC6      | 0.3394                | 1.68          | 1.2           | 0.00E+00 | Ariadne Cell Process Pathways |
| mRNA Transcription and Processing       | Pathway | 39             | 376                    | 266                    | PARG, DNMT3A, H       | 0.3105                | 1.465         | 1.2           | 0.00E+00 | Ariadne Cell Process Pathways |
| Actin Cytoskeleton Assembly             | Pathway | 31             | 55                     | 41                     | ACTA1, FLNC, TM       | -0.4903               | -1.81         | 1.1           | 0.00E+00 | Ariadne Cell Process Pathways |
| top GSEA process DNA Replication        | Pathway | 29             | 134                    | 107                    | ORC6, MCM4, MCI       | 0.3663                | 1.53          | 1.3           | 8.23E-03 | Ariadne Cell Process Pathways |
| DNA Replication                         | Pathway | 29             | 134                    | 107                    | ORC6, MCM4, MCI       | 0.3663                | 1.565         | 1.3           | 8.55E-03 | Ariadne Cell Process Pathways |
| Single-Strand Base Excision DNA Repair  | Pathway | 20             | 120                    | 97                     | ALKBH1, UBE2V2,       | 0.3565                | 1.469         | 1.2           | 8.77E-03 | Ariadne Cell Process Pathways |
| Histone and DNA Methylation low         | Pathway | 32             | 351                    | 237                    | ORC6, PARG, NCA       | 0.2994                | 1.405         | 1.2           | 1.19E-02 | Ariadne Cell Process Pathways |
| Double Strand DNA Non-Homologous Repair | Pathway | 32             | 136                    | 99                     | ALKBH1, UBE2V2,       | 0.3616                | 1.475         | 1.2           | 1.20E-02 | Ariadne Cell Process Pathways |
| Circadian Clock                         | Pathway | 32             | 59                     | 46                     | BHLHE40, NR1D1,       | -0.413                | -1.58         | 1.0           | 1.30E-02 | Ariadne Cell Process Pathways |
| NURD Chromatin Remodeling               | Pathway | 31             | 307                    | 190                    | PARG, NCAPG, DN       | 0.3057                | 1.399         | 1.2           | 1.49E-02 | Ariadne Cell Process Pathways |
| Histone and DNA Methylation             | Pathway | 32             | 351                    | 237                    | ORC6, PARG, NCA       | 0.2994                | 1.416         | 1.2           | 1.49E-02 | Ariadne Cell Process Pathways |
| Direct DNA Repair                       | Pathway | 23             | 129                    | 103                    | ALKBH1, UBE2V2,       | 0.3399                | 1.425         | 1.1           | 1.69E-02 | Ariadne Cell Process Pathways |
| Actin Cytoskeleton Assembly             | Pathway | 31             | 55                     | 41                     | ACTA1, FLNC, TM       | -0.4903               | -1.71         | 1.1           | 2.04E-02 | Ariadne Cell Process Pathways |
| top GSEA process DNA Replication        | Pathway | 29             | 134                    | 107                    | ORC6, MCM4, MCI       | 0.3663                | 1.529         | 1.3           | 2.08E-02 | Ariadne Cell Process Pathways |
| CHRAC Chromatin Remodeling              | Pathway | 16             | 289                    | 187                    | PARG, DNMT3A, H       | 0.2778                | 1.264         | 1.2           | 3.52E-02 | Ariadne Cell Process Pathways |
| SWI/SNF BRM/BAF Chromatin Remodeling    | Pathway | 24             | 284                    | 180                    | PARG, DNMT3A, H       | 0.2797                | 1.282         | 1.2           | 4.10E-02 | Ariadne Cell Process Pathways |

**B. GSEA for Female Rats Sampled at Night**

| Name                                   | Type    | Total Entities | Expanded # of Entities | # of Measured Entities | Measured Entities | Enrichment Score (ES) | Normalized ES | Median change | p-value  | Gene Set Category             |
|----------------------------------------|---------|----------------|------------------------|------------------------|-------------------|-----------------------|---------------|---------------|----------|-------------------------------|
| DNA Replication                        | Pathway | 29             | 134                    | 107                    | ORC1, TOP2A, GM   | 0.4828                | 2.0           | 1.1           | 0.00E+00 | Ariadne Cell Process Pathways |
| SWI/SNF BRG1/BAF Chromatin Remodeling  | Pathway | 25             | 284                    | 180                    | SIRT5, HELLS, SU  | 0.3596                | 1.6           | 1.1           | 0.00E+00 | Ariadne Cell Process Pathways |
| SWI/SNF BRG1/PBAF Chromatin Remodeling | Pathway | 26             | 285                    | 181                    | SIRT5, ARID2, HEL | 0.3724                | 1.7           | 1.1           | 0.00E+00 | Ariadne Cell Process Pathways |
| NURD Chromatin Remodeling              | Pathway | 31             | 307                    | 190                    | SIRT5, HELLS, SU  | 0.3834                | 1.8           | 1.1           | 0.00E+00 | Ariadne Cell Process Pathways |
| NURF Chromatin Remodeling              | Pathway | 17             | 288                    | 177                    | SIRT5, HELLS, SU  | 0.3631                | 1.7           | 1.1           | 0.00E+00 | Ariadne Cell Process Pathways |
| CHRAC Chromatin Remodeling             | Pathway | 16             | 289                    | 187                    | SIRT5, HELLS, SU  | 0.3673                | 1.7           | 1.1           | 0.00E+00 | Ariadne Cell Process Pathways |
| INO80 Chromatin Remodeling             | Pathway | 25             | 449                    | 319                    | SIRT5, PARP2, MP  | 0.4076                | 2.0           | 1.1           | 0.00E+00 | Ariadne Cell Process Pathways |
| SRCAP Chromatin Remodeling             | Pathway | 20             | 284                    | 182                    | SIRT5, ZNF483, H  | 0.3391                | 1.6           | 1.1           | 0.00E+00 | Ariadne Cell Process Pathways |
| TRRAP/Tip60 Chromatin Remodeling       | Pathway | 35             | 412                    | 283                    | SIRT5, PARP2, MP  | 0.3959                | 1.9           | 1.1           | 0.00E+00 | Ariadne Cell Process Pathways |
| Histone and DNA Methylation            | Pathway | 37             | 352                    | 238                    | SIRT5, HELLS, SU  | 0.4013                | 1.9           | 1.1           | 0.00E+00 | Ariadne Cell Process Pathways |
| Histone Acetylation                    | Pathway | 33             | 329                    | 227                    | SIRT5, HELLS, SU  | 0.3762                | 1.7           | 1.1           | 0.00E+00 | Ariadne Cell Process Pathways |

|                                                      |     |     |     |                   |         |      |      |          |                               |
|------------------------------------------------------|-----|-----|-----|-------------------|---------|------|------|----------|-------------------------------|
| Presentation of Endogenous Peptide Antigen Pathway   | 16  | 69  | 41  | HLA-C, CD8A, RAE1 | 0.6715  | 2.3  | 1.1  | 0.00E+00 | Ariadne Cell Process Pathways |
| mRNA Transcription and Processing Pathway            | 49  | 391 | 272 | SIRT5, TRAPPC9,   | 0.3912  | 1.9  | 1.1  | 0.00E+00 | Ariadne Cell Process Pathways |
| rRNA Transcription and Processing Pathway            | 35  | 292 | 162 | RPS4Y1, RPS4X,    | 0.4066  | 1.8  | 1.1  | 0.00E+00 | Ariadne Cell Process Pathways |
| tRNA Transcription and Processing Pathway            | 20  | 735 | 45  | BRF1, GTF3C4,     | 0.493   | 1.7  | 1.1  | 0.00E+00 | Ariadne Cell Process Pathways |
| Tight Junction Assembly (JAMs) Pathway               | 32  | 119 | 95  | MYH6, MYH7, MYE   | -0.5195 | -1.8 | 1.0  | 0.00E+00 | Ariadne Cell Process Pathways |
| RNA Gene Silencing Pathway                           | 23  | 110 | 56  | NUP107, DCP2,     | 0.4769  | 1.8  | 1.1  | 0.00E+00 | Ariadne Cell Process Pathways |
| Histones Sumoylation Pathway                         | 25  | 252 | 169 | SIRT5, HELLS, SU  | 0.3914  | 1.8  | 1.1  | 0.00E+00 | Ariadne Cell Process Pathways |
| Histones Ubiquitylation Pathway                      | 23  | 334 | 228 | SIRT5, UBE2D1,    | 0.3247  | 1.5  | 1.1  | 0.00E+00 | Ariadne Cell Process Pathways |
| Histone Phosphorylation Pathway                      | 35  | 248 | 173 | PARP2, MPG, MAF   | 0.3854  | 1.7  | 1.1  | 0.00E+00 | Ariadne Cell Process Pathways |
| Direct DNA Repair Pathway                            | 19  | 129 | 103 | PARP2, MPG, BRIF  | 0.4017  | 1.7  | 1.1  | 0.00E+00 | Ariadne Cell Process Pathways |
| Single-Strand Mismatch DNA Repair Pathway            | 19  | 125 | 105 | PARP2, MPG, BRIF  | 0.4476  | 1.9  | 1.1  | 0.00E+00 | Ariadne Cell Process Pathways |
| Double Strand DNA Homologous Repair Pathway          | 30  | 184 | 156 | PARP2, MPG, BRIF  | 0.4952  | 2.2  | 1.1  | 0.00E+00 | Ariadne Cell Process Pathways |
| Single-Strand Base Excision DNA Repair Pathway       | 20  | 120 | 97  | PARP2, MPG, BRIF  | 0.4472  | 1.9  | 1.1  | 0.00E+00 | Ariadne Cell Process Pathways |
| Double Strand DNA Non-Homologous Repair Pathway      | 32  | 136 | 99  | PARP2, MPG, BRIF  | 0.4552  | 1.9  | 1.1  | 0.00E+00 | Ariadne Cell Process Pathways |
| Tight Junction Assembly (Claudins) Pathway           | 37  | 137 | 106 | MYH6, MYH7, MYE   | -0.484  | -1.7 | 1.0  | 0.00E+00 | Ariadne Cell Process Pathways |
| Cell cycle Pathway                                   | 140 | 585 | 413 | MLF1, PKIA, CDC2  | 0.3768  | 1.9  | 1.1  | 0.00E+00 | Ariadne Cell Process Pathways |
| Single-Strand Nucleotide Excision DNA Repair Pathway | 26  | 49  | 32  | GTF2H5, RPA1,     | 0.4706  | 1.6  | 1.1  | 7.52E-03 | Ariadne Cell Process Pathways |
| Actin Cytoskeleton Assembly Pathway                  | 31  | 55  | 41  | FLNC, ACTA1,      | 0.5114  | -1.6 | -1.0 | 1.87E-02 | Ariadne Cell Process Pathways |
| SWI/SNF BRM/BAF Chromatin Remodeling Pathway         | 24  | 284 | 180 | SIRT5, HELLS, SU  | 0.3596  | 1.6  | 1.1  | 2.04E-02 | Ariadne Cell Process Pathways |
| Mitochondrial Protein Transport Pathway              | 25  | 111 | 99  | HSPB3, CRYAB,     | 0.3157  | 1.4  | 1.1  | 2.56E-02 | Ariadne Cell Process Pathways |
| Tight Junction Assembly (Occludin) Pathway           | 38  | 294 | 226 | DDX41, MYH6, MY   | -0.3419 | -1.3 | 1.1  | 2.84E-02 | Ariadne Cell Process Pathways |
| Lectin-induced Complement Pathway Pathway            | 23  | 25  | 11  | C5, MASP2, C2,    | 0.6562  | -1.5 | -1.2 | 2.95E-02 | Ariadne Cell Process Pathways |
| Classical Complement Pathway Pathway                 | 26  | 36  | 19  | C5, C1QL3, C2,    | 0.56    | -1.5 | -1.2 | 4.05E-02 | Ariadne Cell Process Pathways |
| Ubiquitin-dependent Protein Degradation Pathway      | 15  | 125 | 86  | UBE2D1, UBE2QL    | 0.3337  | 1.3  | 1.1  | 4.17E-02 | Ariadne Cell Process Pathways |

### C. GSEA for Female Rats Sampled in the Morning

| Name                                            | Type | Total Experiments | # of Measured Entities | Enrichment Normalized Median | p-value | Gene Set Category |      |          |                               |
|-------------------------------------------------|------|-------------------|------------------------|------------------------------|---------|-------------------|------|----------|-------------------------------|
| DNA Replication Pathway                         | 29   | 134               | 107                    | TOP2A, POLE2, M              | 0.4035  | 1.7               | 1.1  | 0.00E+00 | Ariadne Cell Process Pathways |
| INO80 Chromatin Remodeling Pathway              | 25   | 449               | 319                    | TOP2A, CENPF, CI             | 0.3275  | 1.6               | 1.1  | 0.00E+00 | Ariadne Cell Process Pathways |
| RNA Gene Silencing Pathway                      | 23   | 110               | 56                     | NUP210, EIF4E, DI            | 0.4583  | 1.8               | 1.2  | 0.00E+00 | Ariadne Cell Process Pathways |
| Histone Phosphorylation Pathway                 | 35   | 248               | 173                    | TOP2A, AURKB, F              | 0.3445  | 1.6               | 1.1  | 0.00E+00 | Ariadne Cell Process Pathways |
| Single-Strand Mismatch DNA Repair Pathway       | 19   | 125               | 105                    | TOP2A, FANCD2, I             | 0.4087  | 1.8               | 1.1  | 0.00E+00 | Ariadne Cell Process Pathways |
| Double Strand DNA Homologous Repair Pathway     | 30   | 184               | 156                    | TOP2A, FANCD2, I             | 0.4253  | 1.9               | 1.1  | 0.00E+00 | Ariadne Cell Process Pathways |
| Single-Strand Base Excision DNA Repair Pathway  | 20   | 120               | 97                     | TOP2A, FANCD2, I             | 0.3998  | 1.7               | 1.1  | 0.00E+00 | Ariadne Cell Process Pathways |
| Cell cycle Pathway                              | 140  | 585               | 413                    | MLF1, TOP2A, LAM             | 0.4189  | 2.1               | 1.1  | 0.00E+00 | Ariadne Cell Process Pathways |
| Histone and DNA Methylation Pathway             | 37   | 352               | 238                    | SALL1, TOP2A, CE             | 0.3021  | 1.5               | 1.0  | 4.57E-03 | Ariadne Cell Process Pathways |
| TRRAP/Tip60 Chromatin Remodeling Pathway        | 35   | 412               | 283                    | TOP2A, CENPF, CI             | 0.2875  | 1.4               | 1.1  | 4.63E-03 | Ariadne Cell Process Pathways |
| Ubiquitin-dependent Protein Degradation Pathway | 15   | 125               | 86                     | PSMB11, UBE2V1,              | 0.3889  | 1.6               | 1.1  | 4.90E-03 | Ariadne Cell Process Pathways |
| Direct DNA Repair Pathway                       | 19   | 129               | 103                    | TOP2A, FANCD2, I             | 0.3695  | 1.6               | 1.1  | 5.08E-03 | Ariadne Cell Process Pathways |
| Tight Junction Assembly (Occludin) Pathway      | 38   | 294               | 226                    | MYOM1, MYH2, M               | 0.2984  | 1.4               | 1.0  | 5.13E-03 | Ariadne Cell Process Pathways |
| Histone Acetylation Pathway                     | 33   | 329               | 227                    | SALL1, CENPF, CE             | 0.2737  | 1.3               | 1.1  | 9.52E-03 | Ariadne Cell Process Pathways |
| Actin Cytoskeleton Assembly Pathway             | 31   | 55                | 41                     | TMOD1, FLNC, AK              | 0.4626  | 1.7               | 1.2  | 1.04E-02 | Ariadne Cell Process Pathways |
| Double Strand DNA Non-Homologous Repair Pathway | 32   | 136               | 99                     | TOP2A, FANCD2, I             | 0.3864  | 1.6               | 1.1  | 1.07E-02 | Ariadne Cell Process Pathways |
| tRNA Transcription and Processing Pathway       | 20   | 735               | 45                     | POLR3A, RPP14,               | 0.4314  | 1.6               | 1.1  | 2.02E-02 | Ariadne Cell Process Pathways |
| Mitochondrial Protein Transport Pathway         | 25   | 111               | 99                     | DNAJB5, FKBP5,               | 0.336   | 1.4               | 1.1  | 3.09E-02 | Ariadne Cell Process Pathways |
| Lectin-induced Complement Pathway Pathway       | 23   | 25                | 11                     | C9, C2, C7, C5,              | 0.6051  | -1.6              | -1.3 | 3.65E-02 | Ariadne Cell Process Pathways |
| Histones Ubiquitylation Pathway                 | 23   | 334               | 228                    | CENPF, CENPA, SI             | 0.2729  | 1.3               | 1.0  | 3.90E-02 | Ariadne Cell Process Pathways |
